# Supplementary material for: Cortical anchoring of the microtubule cytoskeleton is essential for neuron polarity
Source: eLife. 2020 Apr 15;9:e55111. doi: 10.7554/eLife.55111 (PMC7159925; doi:10.7554/eLife.55111)
Supplement: Figure 1—figure supplement 1—source data 1. [file elife-55111-fig1-figsupp1-data1.xlsx]

## Sheet: Figure 1 Sup 1
Figure 1 Sup 1A	Antrograde EBP2 growth events in PVD axon (%)	wild type	unc-119(ed3)
	w1	100	0
	w2	100	100
	w3	100	100
	w4	100	100
	w5	100	40
	w6	100	100
	w7	100
Figure 1 Sup 1B	Retrograde EBP-2 growth events in PHC dendrite (%)	wild-type	unc-119(de3)
	w1	96.8	66.6667
	w2	98.4	54.5455
	w3	93.5	66.6667
	w4	94.9	70
	w5	95.8	43.75
	w6	100	0
	w7	95.6	30
	w8	95	100
	w9	100	28.5714
	w10	78	31.25
Figure 1 Sup 1C	Retrograde EBP-2 growth events in URX dendrite (%)	wild-type	UNC-119(ed3)
	w1	100	70
	w2	100	100
	w3	98.0392	100
	w4	100	100
	w5	100	100
	w6	100	100
	w7	100	100
	w8	100	100
	w9	100	100
	w10	95	100
	w11	100	100
	w12		100
	w13		100
Figure 1 Sup 1D	Retrograde EBP-2 growth events in PQR dendrite (%)	wild-type	unc-119(ed3)
	w1	73.3	100
	w2	100	66.6667
	w3	100	100
	w4	100	76.1905
	w5	100	100
	w6	96.9	100
	w7	86.2	100
	w8	93.8	100
	w9	100	66.6667
	w10	91.3
	w11	100
	w12
	w13
Figure 1 Sup 1E	RAB3::mCherry intensity in axon (a.u.)	wild type	unc-119(ed3)
	w1	751049	107240
	w2	473129	347213
	w3	853962	91887
	w4	868557	588070
	w5	611714	511822
	w6	981570	542851
	w7	1384948	611503
	w8	915498	241564
	w9	448485	120837
	w10	526788	153133
	w11	472540	54036
	w12	590915	89301
	w13	177878	325980
	w14	640638	363941
	w15	482271	232104
	w16	983390	114638
	w17	326054
	w18	882615
Figure 1 Sup 1F	RAB-3::mCherry intensity in cell body (a.u.)
		wild type	unc-119(ed3)
	w1	104923	361613
	w2	173905	158354
	w3	77696	222281
	w4	164999	157542
	w5	79191	364543
	w6	39228	388006
	w7	22039	429707
	w8	256525	323347
	w9	67454	316326
	w10	157222	252406
	w11	247488	507393
	w12	55572	469169
	w13	91529	463282
	w14	186079	387453
	w15	197039	235257
	w16	177739	406761
	w17		584897
	w18
Figure 1 Sup 1G	RAB-3::mCherry intensity in the PVD dendrite (a.u.)	wild type	unc-119(ed3)
	w1	33541	122312
	w2	15377	22842
	w3	35746	138760
	w4	72115	66574
	w5	32390	85195
	w6	17786	106140
	w7	28593	204120
	w8	64432	104278
	w9	11518	41392
	w10	20272	96533
	w11	54218	163707
	w12	37950	127984
	w13	28875	68416
	w14	67231	95655
	w15	43863	116238
	w16	40928	86003
	w17		202893
	w18
Figure 1 Sup 1H	RAB3::GFP puntas in PVD axon /50 µm	wild type cellbody	unc-119 CB
	w1	17	5
	w2	14	3
	w3	14	5
	w4	11	4
	w5	8	3
	w6	15	3
	w7	15	3
	w8	13	4
	w9	7	4
	w10	13	3
	w11	11	4
	w12	10	3
	w13	12	0
	w14	12	3
	w15	13	5
	w16	10	3
	w17	12	2
	w18	10
Figure 1 Sup 1I	Rab3:GFP puntas in dendrites/50um	wild type dendrites	unc-119 dendrites
	w1	0	5
	w2	1	1
	w3	0	1
	w4	2	1
	w5	0	11
	w6	1	5
	w7	0	10
	w8	1	11
	w9	1	3
	w10	3	5
	w11	0	11
	w12	0	9
	w13	0	8
	w14	5	9
	w15	1	3
	w16	1	7
	w17		8
	w18
Figure 1 Sup 1J	wild type secondary branching	unc-119(ed3) secondary/2° branching	wild type tertiary/3°	unc-119(ed3) tertiary/3°	wild type quaternary/4° branching	unc-119(ed3) quaternary/4°
neuron branching quantification/200um	17	14	14	11	44	25
	24	14	20	8	54	28
	21	10	15	10	47	28
	17	16	17	10	48	26
	20	14	17	8	48	33
	19	15	16	9	42	28
	19	15	18	8	52	38
	17	15	15	8	44	29
	17	16	12	12	42	39
	16	16	13	11	40	26
	18	18	16	7	49	19
	19	13	16	6	33	34
	14	14	14	9	38	30
		17		11		23
		18		10		23
		14		8		25
		17		11		40
Figure 1 Sup 1K	wild type	unc-119(ed3)
axon length/worms body length	0.18641	0.050378
	0.216592	0.086987
	0.205725	0.100018
	0.253844	0.213405
	0.279158	0.069634
	0.256248	0.112778
	0.223283	0.148284
	0.233774	0.130611
	0.180454	0.19025
	0.220929	0.06161
	0.194315	0.153375
	0.151526	0.090495
	0.221642	0.118227
		0.140778
		0.073903
		0.132789
		0.097345
Figure 1 Sup 1L
PVD anterior dendrtites length (%) of PVD CB to the FLP CB	wild type	unc-119(ed3)
	100	100
	100	100
	100	62
	100	100
	100	100
	100	69.6226
	100	51.7089
	100	100
	100	100
	100	100
	100	85.0853
	100	90.9295
	100	100
		100
		100
		71.1579
		100
Figure 1 Sup 1M	Wild type	unc-119(ed3)	unc-119::GFP
worms bends /3min	36	3	40
	37	4	57
	38	5	41
	47	1	65
	78	2	30
	35	13	56
	44	7	28
	57	1	45
	47	1	56
	79	2	55
	53	0	69
	61	2	52
