# Supplementary material for: Cortical anchoring of the microtubule cytoskeleton is essential for neuron polarity
Source: eLife. 2020 Apr 15;9:e55111. doi: 10.7554/eLife.55111 (PMC7159925; doi:10.7554/eLife.55111)
Supplement: Figure 1—source data 1. [file elife-55111-fig1-data1.xlsx]

## Sheet: Figure 1C
Retrograde EBP-2 growth events (% per animal)	wildtype	unc-119(ed3) (Si)	unc119(ed3)(Ex)	unc-119(ed3)(EX); PVD> unc-119::GFP
	100	5.55556	0	100
	100	22.2222	0	100
	100	25	82.1	100
	100	16.6667	62.5	100
	100	0	0	87.5
	100	0	54.5	100
	100	5.55556	25	100
	100	5.26316	0	100
	100	14.2857	8	100
	100	0	0
		53.8462	16.7
		18.75
		25

## Sheet: Figure 1H
	Amphid
time(s)	w1 20180109	w2 20180109	w3 20180109	w1 20180206	w2 20180206	w3 20180206	w4 20180206	w5 20180206	w6 20180206		VNC neurons
0	0	0	0	0	0	0	0	0	0			0	0	0	0	0
0.5	4.58823	2.32034	1.6783	11.6474	1.1903	3.14258	6.49307	4.26751	2.99383			5.91876	5.91876	5.91876	2.61391	2.71653
1	2.89406	4.47718	3.41188	13.6501	3.85152	5.49772	9.57689	7.52035	2.07869			7.60365	7.60365	7.60365	2.4434	7.32109
1.5	3.11833	4.92158	5.10257	15.8971	7.37057	5.8625	10.5534	6.06483	2.07604			10.2461	10.2461	10.2461	2.74669	5.53448
2	6.63138	7.39648	6.12441	12.6965	8.29202	6.59631	11.9419	6.68568	4.39102			12.863	12.863	12.863	3.2534	7.6767
2.5	5.92107	6.96246	5.27583	14.2114	7.28295	7.51213	9.41473	7.75056	3.85099			9.10747	9.10747	9.10747	4.40742	6.93917
3	4.10857	6.90727	4.80285	17.3939	11.6369	6.42933	12.6885	9.70543	4.5966			13.4068	13.4068	13.4068	4.144	7.33197
3.5	6.50476	8.53161	6.84387	19.9809	10.7267	8.34853	11.2185	9.29405	6.22053			15.2653	15.2653	15.2653	5.40958	5.28261
4	7.50677	8.51991	6.89997	17.0441	13.3266	8.40187	13.8623	8.90202	6.5977			14.1757	14.1757	14.1757	5.40998	8.63243
4.5	5.21143	6.53718	7.51452	21.001	11.8331	9.31148	13.6768	9.13637	5.29445			14.909	14.909	14.909	5.88097	8.76502
5	6.71924	7.6049	7.12597	20.272	12.5989	9.02554	13.9349	10.6676	7.06283			19.1491	19.1491	19.1491	6.23135	9.67812
5.5	9.61854	10.0908	6.99476	19.9974	13.259	9.16276	14.328	13.4569	7.01631			17.7909	17.7909	17.7909	5.57231	8.32423
6	10.3003	8.84346	8.55786	22.1208	13.6951	9.95551	15.7726	12.764	6.381			14.8192	14.8192	14.8192	5.62344	8.67754
6.5	13.0004	10.3412	7.66661	22.294	14.6144	9.86166	13.6455	16.7518	6.71112			14.2649	14.2649	14.2649	6.5104	8.23499
7	7.27524	12.2299	6.74428	22.9142	15.3058	9.8485	15.5164	13.7892	6.56808			12.8668	12.8668	12.8668	6.05989	7.64498
7.5	7.82847	12.9389	7.07639	20.0654	16.0349	10.7644	17.0116	14.959	7.19892			12.502	12.502	12.502	6.22283	10.5452
8	10.1995	10.7551	8.25669	26.165	16.5278	11.9541	18.4343	17.4078	8.51618			14.6059	14.6059	14.6059	7.09677	10.3351
8.5	10.8674	12.0726	8.91869	25.3222	16.9108	10.965	17.8791	15.3114	7.646			16.1723	16.1723	16.1723	7.22224	10.7988
9	13.1208	12.9283	7.94456	25.1242	16.3469	12.0736	17.0039	16.3959	8.81334			15.3022	15.3022	15.3022	7.57658	10.1159
9.5	12.4394	11.6025	8.75291	24.853	17.3741	12.5325	16.4803	16.0336	8.83551			14.6154	14.6154	14.6154	9.08781	8.48889
10	11.5699	11.476	8.86776	28.2613	18.0491	11.2784	16.7697	17.3192	7.73384			16.117	16.117	16.117	9.08006	11.3248
10.5	11.6919	11.3949	7.26258	23.0495	18.2123	12.8238	18.2915	17.8503	6.82703			16.5783	16.5783	16.5783	8.82931	10.5331
11	12.0245	10.5993	7.8849	27.91	16.6757	13.128	18.0927	17.4911	8.20231			18.4986	18.4986	18.4986	9.24348	10.1213
11.5	14.0032	12.0111	9.66366	27.3816	17.4934	12.4261	17.2296	20.9336	7.03376			16.8122	16.8122	16.8122	10.4412	12.7555
12	18.3501	11.1462	8.0055	25.8799	17.5967	12.2969	20.0686	19.793	9.04438			19.1801	19.1801	19.1801	9.53691	12.6775
12.5	13.9399	14.2427	8.48677	21.7767	17.9794	13.7143	17.2567	19.1399	7.88251			17.2971	17.2971	17.2971	10.8875	12.5758
13	11.8415	13.5454	9.22608	24.7165	19.6983	14.4929	17.5831	18.4624	10.0056			17.7387	17.7387	17.7387	9.5434	11.2083
13.5	15.0786	11.4303	9.44296	24.5354	21.7304	13.8872	17.9694	18.9201	9.66042			18.5167	18.5167	18.5167	9.57386	11.307
14	13.7334	12.3633	9.27923	23.3793	21.9066	15.0177	18.2552	16.9169	10.3675			19.6711	19.6711	19.6711	10.6173	11.2023
14.5	19.653	11.929	10.6402	25.5047	18.0584	14.9623	20.0493	19.1033	12.4454			20.2915	20.2915	20.2915	11.9005	12.0177
15	13.6524	13.0989	10.4454	31.638	23.2539	14.8943	23.0378	22.4131	10.3283			18.8455	18.8455	18.8455	10.1141	12.4906
15.5	13.6636	16.2415	11.0699	26.9349	19.983	13.8261	20.7751	20.2279	10.9518			17.1898	17.1898	17.1898	11.6094	12.0114
16	14.2224	15.0629	10.0019	28.8413	19.9397	13.8094	20.9241	20.6579	10.7644			20.6602	20.6602	20.6602	11.9002	12.6803
16.5	12.9952	15.485	9.72454	30.0892	23.0916	12.927	21.3513	19.7126	10.9453			21.8279	21.8279	21.8279	12.2755	13.0986
17	13.2814	14.3334	8.98645	28.8113	24.9086	14.7478	20.7233	22.5127	11.2162			20.0162	20.0162	20.0162	12.5785	11.9673
17.5	8.77272	14.6765	10.1487	29.3305	24.0695	13.8684	22.9036	22.9241	11.8702			20.4435	20.4435	20.4435	11.2876	13.6017
18	12.3841	13.9967	9.99409	29.7681	22.5911	15.2424	21.4173	21.1594	11.3505			22.5076	22.5076	22.5076	11.464	14.6289
18.5	14.2113	14.0262	11.2969	26.0501	24.0715	14.6398	22.9702	24.0676	10.56			24.5384	24.5384	24.5384	12.4006	12.5815
19	17.5301	15.5587	9.51156	30.2474	23.1764	15.6372	22.5056	22.3105	10.676			22.0055	22.0055	22.0055	11.913	16.0157
19.5	16.1105	15.1346	10.2743	30.8484	25.822	15.4009	21.2298	21.2297	9.57781			19.9588	19.9588	19.9588	12.9486	14.8559
20	18.4811	17.2894	11.0299	26.0133	22.5419	15.8916	23.366	24.8385	10.3243			22.8026	22.8026	22.8026	13.9065	15.5814
20.5	17.0247	14.7719	10.8136	30.3597	21.8946	16.8166	25.2377	24.4004	9.261			20.6209	20.6209	20.6209	13.5589	15.2294
21	17.4216	15.8112	11.3187	32.1579	22.257	17.0608	24.5204	23.9667	12.2902			19.3549	19.3549	19.3549	12.9179	14.4138
21.5	16.6121	15.2991	11.4564	30.0417	21.3642	16.0801	25.868	20.9701	10.8186			19.9201	19.9201	19.9201	14.1232	14.5373
22	15.8109	16.2744	11.2982	26.8451	22.5089	17.3883	26.8276	24.003	10.61			23.0948	23.0948	23.0948	15.3136	14.2989
22.5	11.3212	17.7687	10.6622	31.3622	23.1152	18.8441	26.7679	21.3205	12.1527			22.8436	22.8436	22.8436	14.9844	15.9762
23	12.3066	17.4206	11.4032	24.505	23.8524	20.1004	25.8116	21.5993	11.2376			21.8242	21.8242	21.8242	14.6391	14.8044
23.5	15.3425	17.4791	11.5938	28.3114	22.7356	17.3663	24.2494	22.1784	12.5055			23.6476	23.6476	23.6476	13.9552	16.2777
24	11.5016	17.4706	11.2973	27.3667	25.9551	18.7171	22.4062	23.8598	12.2581			19.7076	19.7076	19.7076	13.0252	16.2339
24.5	14.0783	15.2325	11.9337	28.5713	24.6506	16.7216	25.4919	24.8853	14.0186			19.1485	19.1485	19.1485	14.0067	17.1039
25	12.9665	17.6029	9.27755	32.6546	26.1549	19.0646	26.5966	24.1175	12.6116			19.0833	19.0833	19.0833	16.4401	15.4475
25.5	14.5596	17.9178	12.6897	34.8775	25.6054	17.9174	25.8305	23.5831	11.3524			19.4916	19.4916	19.4916	15.957	14.7373
26	18.0802	18.2495	10.3973	32.7568	26.521	17.8686	25.7965	25.7992	11.4268			18.7533	18.7533	18.7533	16.9092	16.8311
26.5	12.7959	17.3436	12.5854	31.7993	24.8618	18.8508	26.6163	26.2689	13.4247			20.9796	20.9796	20.9796	17.2639	14.5468
27	15.6378	16.6047	12.6952	32.2987	24.8323	18.3658	25.0312	24.6094	14.1449			17.9546	17.9546	17.9546	16.3206	15.9217
27.5	19.5322	17.1681	13.2566	32.8774	24.6707	17.368	23.9124	23.5501	14.3704			21.0125	21.0125	21.0125	16.4039	17.7797
28	13.8069	16.5497	11.0974	34.4481	26.759	16.365	29.8446	24.345	14.2916			17.2301	17.2301	17.2301	15.9676	15.9096
28.5	16.729	18.3034	11.4111	35.6532	25.8432	19.3298	28.3008	25.267	14.7532			18.7922	18.7922	18.7922	15.2652	18.3281
29	18.59	16.7791	10.8103	34.3631	26.4172	18.0805	25.8319	23.4299	16.0007			18.5529	18.5529	18.5529	15.2806	17.074
29.5	17.3284	19.4379	10.7469	33.9257	29.0644	16.725	27.1907	26.3287	14.8044			18.2199	18.2199	18.2199	16.4889	17.1773
30	19.7301	19.3797	12.2982	34.4477	27.14	19.6917	27.8627	26.5021	13.3853			18.6646	18.6646	18.6646	18.6112	18.7761
30.5	17.6357	17.9795	11.7828	32.8686	25.7521	18.8464	28.0602	27.6524	16.2205			19.7036	19.7036	19.7036	19.0139	18.8591
31	14.2855	18.7523	11.2276	34.8966	28.3484	19.6828	27.7743	27.0475	14.6887			19.4385	19.4385	19.4385	17.6906	14.4858
31.5	17.1922	19.3033	11.4014	33.5516	28.0996	19.6707	25.4416	28.2875	15.1137			20.3286	20.3286	20.3286	18.6362	17.8571
32	21.7683	19.4253	11.1133	28.2216	27.8547	20.7964	28.08	27.5202	14.3714			18.3716	18.3716	18.3716	19.1276	17.2438
32.5	16.4306	20.363	13.2045	35.7695	27.7644	19.6647	26.4849	24.3276	14.4106			18.3487	18.3487	18.3487	19.8135	16.1578
33	20.2833	20.3833	11.2029	34.9998	28.973	18.7724	27.2196	25.8104	14.0037			17.3865	17.3865	17.3865	19.9235	18.1147
33.5	15.7023	18.9038	11.7495	35.6565	28.4524	18.8363	26.5009	26.2751	13.695			19.0698	19.0698	19.0698	18.1692	15.4344
34	15.4657	18.3302	13.0876	31.8678	27.4257	18.6263	28.5573	27.1065	13.5274			21.8443	21.8443	21.8443	18.4814	18.1538
34.5	19.6544	21.3795	13.1595	33.6075	26.7189	18.9275	29.7528	26.5041	16.3755			20.2382	20.2382	20.2382	21.0503	16.6127
35	17.9339	19.4758	13.0928	33.8154	29.3831	19.7463	26.6628	29.2817	15.1781			21.6647	21.6647	21.6647	20.2501	16.7537
35.5	14.7613	21.0711	14.6687		28.3704	19.5279	29.5251	25.6867	16.7249			21.9464	21.9464	21.9464	19.5049	16.5474
36	15.2744	20.3889	13.7778		29.0966	20.1281	29.6736	27.8174	16.9437						19.9014	16.2276
36.5	17.1816	21.2979	13.8014		28.495	21.2351	28.2474	29.3814	17.6899						17.5375	16.7113
37	17.1639	21.553	11.6241		29.3219	21.046	25.4581	30.6548	16.947						19.0554	17.4182
37.5	17.9331	23.3583	11.1231		26.909	21.069	23.1644	29.1015	15.7132						19.0345	18.18
38	20.0164	21.5792	12.7116		27.1738	19.9417	25.6127	31.1348	15.9172						17.6196	18.6226
38.5	20.3503	21.2765	14.4814		29.809	20.9529	29.8729	28.7287	16.8183						18.5237	19.2181
39	18.8179	20.2243	11.7987		30.7736	22.2612	29.2836	29.1775	16.2606						20.2457	19.2823
39.5	17.6608	22.8752	12.7136		32.6757	20.7341	29.2274	29.7715	16.2158						16.2164	16.9414
40	17.8071	21.4602	13.7606		30.2176	21.3143	29.2904	28.8373	16.9345						19.5598	18.3515
40.5	17.233	21.4529	12.9576		28.1492	20.7689	29.2793	28.9468	17.2588						19.8912	18.0118
41	16.4276	22.6348	13.3352		28.4955	20.4627	32.2311	28.3043	15.4628						20.2925	18.6692
41.5	13.3188	22.2781	15.1262		28.5752	21.1994	26.6592	31.4319	16.2877						21.5429	18.1827
42	21.5127	20.8345	15.2646		31.6439	20.7159	28.2858	31.2743	16.7803						20.6799	17.3717
42.5	21.6161	22.5332	14.95		31.7151	22.0619	29.6966	26.8444	16.9825						20.8825	17.088
43	20.1035	23.0781	12.6727		30.0927	21.6536	28.933	26.6657	15.6121						18.9447	17.3548
43.5	18.4019	21.5468	16.6672		31.5767	22.8941	29.4971	27.4456	16.9866						20.1642	18.0681
44	19.0655	23.8602	12.3529		29.1702	21.504	28.4154	27.8306	16.9638						19.8612	18.2833
44.5	19.368	25.3971	15.6293		31.3319	22.2882	26.9472	30.8564	16.7591						18.8279	17.6028
45	17.92	26.6525	15.3362		30.1502	21.6493	26.7839	29.6981	16.003						17.8834	21.0439
45.5	19.4854	24.2386	14.6122		27.2015	22.3985	26.9905	30.2699	17.2696						18.5099	18.5312
46	16.3543	22.8731	14.4627		31.3847	20.9652	30.9691	31.2279	16.5778						18.0598	19.3579
46.5	20.3872	21.9813	14.4467		32.531	22.3974	29.7381	32.4546	15.0819						19.2628	19.3709
47	19.5048	21.454	12.9969		31.6095	22.8359	30.3597	28.3107	18.5318						20.4073	18.7001
47.5	18.8613	24.0826	14.8686		30.7979	23.5056	28.47	30.6107	17.1868						20.7947	20.6068
48	18.5828	23.7893	14.8423		29.735	23.805	28.7369	29.0935	17.2311						21.3255	18.1371
48.5	19.5604	24.095	14.8093		28.4111	22.7877	28.1634	32.8018	15.7116						22.2572	19.3087
49	15.7051	23.308	13.4982		31.4356	24.2164	28.0433	30.5843	15.2783						20.1747	19.5599
49.5	25.7091	24.994	14.2197		30.5493	23.7905	30.035	32.6549	16.1195						21.0268	19.2994
50	20.5326	21.8048	14.3137		31.3931	25.1609	28.5631	33.859	18.0664						20.0893	18.4838
50.5	21.2196	25.8209	15.7997		32.6091	25.3511	28.6146	30.4358	18.3862						19.4007	19.5859
51	17.5475	25.0987	15.2911		32.2382	23.9273	30.0193	31.2298	18.2529						21.425	20.7876
51.5	15.8823	24.5474	17.6844		31.9434	24.9295	31.8188	30.5655	18.4801						20.5675	21.2792
52	22.412	23.4573	16.2659		31.558	25.5803	29.9114	31.3248	18.512						20.4853	20.0894
52.5	17.1141	24.5558	15.4083		32.3315	24.0455	31.1166	29.0005	18.385						20.2772	20.457
53	18.1219	25.3687	14.9289		32.2884	23.1795	29.0904	28.5497	19.2254						19.926	21.1833
53.5	18.4216	23.1595	16.2374		35.5024	25.0805			17.8802						20.4995	19.8991
54	16.1457	23.2696	14.2885		33.5857	25.8517			18.8502						20.7075	20.0297
54.5	20.2829	23.2959	15.2029		36.3561	25.371			19.0882						20.0935	21.2378
55	20.2736	22.7763	15.9039		33.8348	24.1645			20.0432						21.2624	19.7874
55.5	15.1654	21.7872	17.1092		39.048	26.23			19.2924						19.8014	20.4442
56	18.7209	22.4714	17.8376		34.0808	25.1119			17.9801						21.5438	21.2354
56.5	18.2134	22.3256	16.0183		36.7987	25.7061			19.1567						20.9237	21.506
57	18.2432	24.6941	16.7816		36.0776	25.48			18.6979						21.9593	24.7213
57.5	18.725	24.5514	16.064		34.2535	25.8913			18.2929						21.8712	22.8414
58	17.594	23.6715	17.416		34.9305	24.2156			19.6202						24.6754	23.94
58.5	22.5814	25.1078	17.3716		33.7249	25.5496			18.7737						21.7099	22.2605
59	12.8849	25.3469	15.6982		33.9415	27.1076			17.1168						20.2373	22.2317
59.5	17.0087	24.3299	16.3263		35.9795	27.1126			18.4481						22.2591	22.4246
60	20.3833	23.1603	15.705		36.6933	25.9642			19.643						20.7588	24.7924
60.5	19.3986	24.6764	16.6048		35.4541	25.6053			19.7217						22.5185	22.6341
61	20.1969	23.5422	15.7306		35.4479	25.7079			17.4615						21.91	23.964
61.5	19.6063	25.3563	17.5404		36.2819	24.9423			19.3488						22.8557	22.0307
62	16.8819	22.3497	16.5515		36.9557	26.1355			18.2219						24.025	22.8373
62.5	19.5496	24.0712	15.3448		32.2224	23.4259			18.7034						21.3586	22.6934
63	20.1038	23.2425	17.9827		35.5921	25.3575			18.3901						22.1493	22.1362
63.5	14.3079	22.5861	16.4355		35.716	26.5095			18.9632						22.3938	22.8244
64	16.3918	24.2314	16.3033		36.2998	26.7248			20.1725						22.1678	22.6003
64.5	17.8523	24.1821	16.6844		36.4109	25.2077			18.8604						23.462	23.4063
65	14.9229	25.278	16.4451		36.8881	26.9983			19.5401						23.9926	20.9376
65.5	14.9047	24.1358	18.4264		34.7251	26.8004			19.8159						23.0164	22.4338
66	16.8075	23.8417	16.6541		38.2545	25.2326			20.0822						23.0468	22.8527
66.5	16.2495	24.7753	17.7725		38.6837	25.4999			19.0331						21.8381	21.6368
67	21.4181	22.8543	17.9874		36.6206	26.0441			19.2747						23.4591	21.6145
67.5	16.9794	23.9621	19.233		34.7742	27.3361			17.8483						22.6558	21.3544
68	19.8042	21.7882	18.6584		34.3972	25.2504			19.2441						22.7608	22.7458
68.5	23.7947	23.434	19.2146		36.2064	24.5246			19.5864						25.1862	22.619
69	22.3662	22.9247	20.0585		37.1016	25.7616			18.8801						23.3467	24.2862
69.5	25.6107	23.0358	17.7413		34.7449	27.2033			17.9917						24.8191	24.3356
70	22.7886	25.7999	16.5942		37.5814	26.4598			18.9613						24.7716	23.9764
70.5	20.2627	22.9764	17.783		35.4637	26.5359			18.7269						24.7832	22.6802
71	23.7906	25.1855	17.2472		35.8687	26.1201			19.7039						22.8597	24.6156
71.5	20.9109	20.7602	17.7618		35.3407	26.7688			20.2427						25.999	25.7019
72	26.0857	23.7582	20.7747		36.7667	26.1067			20.8256						23.1099	21.9858
72.5	23.3897	21.6595	20.2353		39.2682	26.5578			19.1576						24.0563	22.6243
73	20.2533	23.4651	19.4098		38.1236	26.8943			19.5985						20.4635	24.5504
73.5	19.9998	24.1352	19.1324		36.4941	26.9211			18.8961						23.1889	22.729
74	23.1773	22.0556	20.083		37.1141	27.5377			19.4007						24.5324	23.0434
74.5	18.0004	24.0627	17.4289		40.4253	27.1791			21.0381						24.2971	24.471
75	16.9979	24.0321	19.7768		35.0347	25.6528			19.2963						24.8824	23.1169
75.5	19.0346	24.5019	19.1781		35.0955	28.0322			18.9857						23.7951	21.8063
76	17.5103	25.0286	19.9141		37.4924	28.973			19.8654						25.6416	21.5991
76.5	21.9708	23.8023	21.008		37.2207	29.2425			19.1865						24.4942	24.3513
77	18.3254	25.2368	17.0676		37.0964	27.6621			20.9966						25.4614	22.5307
77.5	17.009	25.5022	18.4848		37.0126	27.3878			19.9793						23.8862	24.6793
78	23.905	25.8603	19.3628		40.2751	28.3647			21.5684						26.0104	26.5663
78.5	18.9214	24.232	18.9331		36.7943	27.5709			18.9708						25.1264	24.7219
79	16.6819	22.2578	20.4868		36.5489	28.7741			17.9626						24.825	25.6487
79.5	19.9267	24.2677	19.7696		38.8164	27.9708			19.7152						24.7016	22.7954
80	20.2722	26.9433	21.4189		41.921	28.2065			20.1577						24.9372	23.0764
80.5	22.94	24.6197	19.9271			26.4299			19.0335						26.7656	24.0452
81	20.1038	28.2101	17.4286			25.9544			20.8341						26.1741	22.4301
81.5	19.4193	25.1486	19.5953			27.7635			20.1356						26.026	23.6167
82	23.7198	28.1274	18.5501			28.1894			20.1789						27.7707	23.5315
82.5	20.1486	23.7884	18.5202			27.6928			19.1748						26.3218	24.2738
83	22.779	24.726	18.2615			28.2766			19.0915						25.0827	25.8115
83.5	20.875	26.7908	17.9818			28.5593			18.8321						25.7322	26.9141
84	21.4451	26.747	22.6317			27.2401			22.1597						26.1645	24.8002
84.5	23.0817	25.5982	20.5078			27.872			19.5681						24.2939	25.8815
85	18.3854	25.646	18.9754			27.5471			18.9177						24.8565	23.9409
85.5	25.7101	26.3396	18.2039			28.1814			22.1408						26.4965	23.7512
86	21.1461	26.8823	21.3237			27.2054			21.3397						27.6597	24.0289
86.5	20.7232	28.2579	18.3757			28.0567			20.5227						26.1327	25.211
87	23.4404	25.061	18.5994			27.7416			19.5491						25.7561	22.6704
87.5	19.1323	26.5707	19.4059			27.7599			23.1069						25.7864	23.0215
88	23.9852	27.7888	22.5426			28.0703			18.6887						27.2852	24.543
88.5	26.6215	25.6617	21.7834			29.0058			21.3504						26.8349	23.3548
89		25.9907	20.1798			30.0928			19.7432						27.4708	25.4244
89.5		28.0193	23.1127			28.9034			21.2814						26.842	25.077
90		28.5296	21.9065			28.5111			20.1115						27.9387	25.3223
90.5		25.4979	19.2704			29.742			19.7						29.0082	24.1249
91		25.9647	19.5526			28.1354			21.4662						26.541	23.4871
91.5		28.4617	20.5181			29.43			21.3809						27.4096	26.1618
92		28.4617	23.1005			28.5976			20.9787						27.5957	24.5179
92.5			19.2886			30.1926			22.4604						27.4556	24.1619
93			20.7511			29.4655			20.4932						26.727	27.1096
93.5			18.7654			31.074			21.5456						27.0967	25.5036
94			20.3038			33.0309			21.7536						28.7108	24.8229
94.5			21.3228			29.53			21.5564							25.0247
95			21.7555			28.8477										25.8213
95.5			22.3773			29.4881
96
96
96
96
96
96

## Sheet: Figure1I
unc-119::gfp KI immobile fraction	Amphid	VNC neurons
w1	80.6809	80.2495
w2	76.295	80.2495
w3	83.087	80.2495
w4	66.3907	77.3957
w5	66.7227	78.3564
w6	74.8018
w7	71.508
w8	70.8749
w9	81.5009
