# Supplementary material for: Cortical anchoring of the microtubule cytoskeleton is essential for neuron polarity
Source: eLife. 2020 Apr 15;9:e55111. doi: 10.7554/eLife.55111 (PMC7159925; doi:10.7554/eLife.55111)
Supplement: Figure 3—figure supplement 1—source data 1. [file elife-55111-fig3-figsupp1-data1.xlsx]

## Sheet: Figure 3 - sup 1A,B
Figure 3 - sup 1A	N2	unc-44(hrt2)	unc-44::GFP-KI
worms bends/3min	50	3	15
	49	6	34
	56	1	13
	57	0	15
	33	0	23
	48	1	25
	56	2	39
	61	1	25
	35	2	38
	57	1	23
	47	3	12
	59	0	42
	60	1	52
	59	0	37
	33	0	35
	47	0	20
	33	2	32
	42	0	19
	45	0	39
		0	30
		0	43
		1	21
		1	45
Figure 3 - sup 1B	stop	stop	stop	stop	backwards	backwards	backwards	backwards
worms movement	N2	UNC-44::gfp KI	UNC-44::gfp,vhhGFP:UNC-33S	unc-119(ed3);UNC-44::gfp,vhhGFP:UNC-33S	N2	UNC-44::gfp KI	UNC-44::gfp,vhhGFP:UNC-33S	unc-119(ed3)UNC-44::gfp,vhhGFP:UNC-33S
	6	18	8	11	0	18	4	7
	6	15	20	14	3	8	13	6
	10	16	6	15	0	12	2	13
	9	14	13	12	2	8	5	5
	10	16	20	22	0	9	6	2
	10	17	6	14	1	6	1	2
	11	20	12	11	0	13	7	7
	10	21	16	12	4	17	6	2
	13	20	7	13	3	10	3	4
	10	21	22	19	3	12	11	1
	7	15	11	7	1	4	3	7
	6	12	16	12	1	4	3	4
	8	10	17	12	0	6	4	6
	6	8	21	18	0	2	15	5
	8	19	18	12	2	7	7	5
	7	19	11	14	0	12	4	7
			13	15			6	5
			15	11			3	6
				16				2
				15				4
				12				5

## Sheet: Figure 3 - sup 1C
unc-44:gfp KI FRAP in VNC	(time(s)		wild type										unc-119(de3)											unc-33(mn407)
			w1	w2	w3	w4	w5	w6	w7	w8			0	0	0	0	0	0	0	0	0	0		0	0	0	0	0	0	0	0	0	0
	0		0	0	0	0	0	0	0	0			3.60479	0.493619	3.28628	2.3335	-3.14506	2.93221	0.530992	0.20134	3.5202	2.66624		5.22643	2.67725	0.611132	3.47273	4.82702	4.67359	5.6466	1.39236	-0.51543	2.39529
	0.5		3.44082	1.6831	4.36223	4.01103	3.1595	2.99159	5.52116	6.07821			1.85321	3.89995	2.93117	2.53801	-5.86924	6.24471	0.379042	5.75709	6.03556	6.84965		6.18766	2.16366	2.29084	4.92111	6.90559	6.91365	4.54046	5.10209	2.63297	3.16479
	1		4.83965	1.78034	8.89765	5.60655	5.10784	3.89667	7.34397	7.10353			2.75579	3.32566	3.27072	3.81898	-3.89494	4.83919	0.322806	5.35407	8.29422	9.23571		6.48605	4.55628	2.81669	5.20933	6.60473	7.63672	4.87932	1.86026	2.89883	3.9566
	1.5		7.07887	1.78336	9.59999	7.02605	5.29265	6.71561	9.50901	7.55677			5.53637	4.52565	4.01292	4.3342	-4.83915	6.57017	1.06786	6.31282	9.09407	11.0059		7.21559	4.34722	1.90459	5.27403	7.61684	8.01584	5.38927	3.07668	3.62611	3.84427
	2		7.26957	4.4048	8.77484	7.5154	6.34034	5.61717	9.83523	8.42066			2.94973	2.70772	2.70139	1.26617	-4.82179	5.8961	1.92984	6.33787	10.9504	9.78356		7.13112	3.9147	3.15496	5.61545	7.93263	6.80004	7.07553	4.06157	1.65365	3.84971
	2.5		8.06743	4.78053	9.34273	5.02927	6.8957	7.55364	10.4173	10.3585			4.6764	5.05416	4.23719	3.09294	-8.31533	7.28933	1.90587	7.03074	6.89834	11.7566		7.96722	3.9667	2.60638	6.54912	8.58983	7.6595	6.63919	3.48641	3.88624	5.44192
	3		7.44981	3.85933	8.41958	6.46612	7.01175	6.29783	10.3988	9.57888			5.22624	5.97774	3.93496	7.71525	-6.33099	7.69575	0.820674	8.31771	10.018	13.6193		7.61659	5.91127	2.74575	7.06428	6.73125	9.14276	8.18007	3.29206	5.14069	4.37103
	3.5		7.83519	1.28027	8.90775	4.51872	5.4696	7.72482	10.8284	9.67133			5.14278	7.59718	3.37067	4.01886	-4.55669	8.08873	0.085191	10.9081	9.34265	13.9511		7.80521	6.5712	3.74966	7.608	8.22942	9.19318	8.90889	3.1737	4.14754	5.43665
	4		8.95335	3.47081	8.74463	7.04199	5.88182	5.85987	11.3009	10.2813			5.06496	3.75359	5.84792	6.49545	-5.57356	5.61178	1.13466	9.06442	13.1171	9.55162		6.93582	4.95797	3.19403	7.45702	9.4205	7.43793	6.71099	5.35773	4.26486	4.10408
	4.5		6.38935	3.2717	8.71049	8.90122	6.63584	7.07804	10.9588	10.5624			4.14392	4.58436	6.56471	5.50795	-5.7847	7.33216	2.86682	10.7081	10.461	13.4971		8.8127	5.60947	3.74914	7.18221	8.90533	8.60658	5.66143	4.91745	3.67648	4.1528
	5		9.19701	3.63609	8.18308	5.79919	6.39816	7.83239	11.5383	10.1809			5.41177	7.11324	3.82837	4.54675	-9.33831	8.14768	5.19255	7.29818	13.3014	9.83545		8.66421	4.70386	3.47388	8.24993	8.73602	10.1602	7.6765	3.86632	5.79731	4.81459
	5.5		11.4681	4.47603	6.93961	7.25175	6.55133	7.10865	10.2586	10.4506			7.62983	5.10938	5.14822	4.58789	-5.20202	8.46701	1.98392	9.60985	12.9901	15.5936		8.7766	7.1013	4.82076	9.02822	8.41563	10.4114	10.846	3.52821	5.73336	5.0403
	6		10.4677	3.85217	6.08018	9.01547	6.80857	6.63501	11.6173	9.51118			5.59752	6.84042	3.46456	4.51287	-6.46914	9.64579	2.26213	10.4968	14.4751	12.3342		8.40747	9.00197	4.5956	9.88922	10.0951	10.1164	11.294	5.53437	4.71415	6.48661
	6.5		9.92564	4.89475	5.6582	10.1248	4.67084	7.74341	12.1223	10.8565			7.15399	5.13652	4.0622	4.45169	-6.82856	7.47778	4.09138	6.75009	13.5148	12.1887		8.58709	7.83626	4.063	8.62568	8.17041	11.1944	9.0404	3.1198	2.7684	3.86947
	7		8.95184	2.04753	8.13472	6.71459	6.85266	7.93569	11.9708	11.2814			6.80657	5.53813	3.72731	7.48989	-7.14434	9.6353	3.22574	11.9747	15.7406	12.7253		10.3085	7.51079	4.94056	8.51204	9.64764	9.1065	10.2496	3.85689	8.03308	4.33167
	7.5		7.76481	4.63164	3.03189	11.9523	6.74621	7.52338	12.4217	10.7108			6.31109	3.5213	4.49883	6.21111	-5.44577	9.22259	3.36284	9.91539	15.5308	15.0796		9.9378	8.6365	4.80213	9.6745	9.46026	9.89961	7.52254	4.30742	3.43968	3.77394
	8		8.03419	4.60147	6.53093	7.81268	6.59238	7.91648	12.8104	10.2125			6.95094	4.63269	6.04453	4.30049	-10.1514	9.77624	2.85241	10.7361	14.9558	16.5021		11.3598	10.849	4.63576	9.46395	9.91027	10.2112	10.7196	4.18154	6.1639	4.82822
	8.5		7.23511	3.91813	8.97837	12.9302	5.25725	6.50445	11.6046	9.68504			6.30214	6.30669	5.72703	4.25127	-6.96469	9.32822	4.83629	8.79189	14.2417	12.8316		9.45184	9.32111	3.96003	9.12855	10.5695	11.295	9.87306	5.07857	2.5905	4.08163
	9		10.1489	5.4987	8.15627	7.40003	5.40062	8.36419	11.8282	11.1119			4.95951	2.2572	5.03537	2.17514	-4.96781	7.22324	4.30629	9.10523	16.5907	11.7437		9.31763	9.85533	6.13452	8.71466	10.2616	11.4907	8.86926	5.3546	6.65668	5.10665
	9.5		9.14028	4.31982	6.3516	11.6092	6.39669	6.75953	12.0949	9.52868			6.60298	6.06472	6.10461	4.74605	-6.65317	10.9833	4.25796	9.95178	17.8887	15.0297		11.756	11.0106	6.29022	8.59829	9.02953	9.67995	10.2628	7.52936	9.1902	5.11139
	10		9.20378	3.25589	7.90178	10.5146	7.18574	8.70522	11.4922	9.70058			6.18955	6.3783	6.45606	6.66066	-5.5294	10.373	3.61546	9.70659	15.907	11.4855		12.3074	10.6308	6.05405	9.20903	10.2961	10.6619	0.832905	8.54933	7.82782	5.45552
	10.5		8.66958	5.09606	8.64915	8.10105	7.71921	7.0823	10.0556	10.7058			4.08671	7.29976	5.95128	6.42319	-5.73207	9.92678	4.96606	11.0531	14.6989	11.9848		11.0662	7.81439	5.61201	8.3332	10.2302	12.1563	1.85588	7.40674	6.22192	5.76551
	11		10.3602	5.02306	8.25088	9.40454	5.69468	8.08217	10.9393	10.0972			5.34634	6.10182	5.19068	2.37223	-7.6991	8.38434	3.59408	10.7473	13.4744	12.7554		10.7916	8.12406	6.44073	8.07075	10.4185	11.0355	0.303457	6.58623	7.75194	6.13368
	11.5		10.193	3.75626	11.193	6.86313	3.56539	7.31191	12.357	10.2132			5.08845	7.86472	4.70882	3.95157	-5.97573	10.3415	6.2218	9.37976	11.8682	14.5286		9.45455	8.93844	7.01897	7.90553	10.4826	10.7522	2.38122	7.26257	6.10956	5.00419
	12		12.5557	3.82685	9.68386	8.25984	6.78318	7.53935	11.4059	11.8525			5.90985	6.58955	3.6421	7.46035	-6.56027	8.91624	6.91085	14.5738	15.1138	11.9266		9.54181	10.7412	4.92802	8.40868	11.7331	11.5432	3.97959	7.9374	6.27537	6.15493
	12.5		14.8527	4.23688	5.77011	9.39864	6.34635	8.14542	9.37984	10.7112			5.13123	6.39162	4.91168	3.46767	-6.31989	11.0015	5.60496	11.0498	15.1025	17.1685		11.9262	8.89683	6.35305	7.75623	11.0505	10.5632	2.41806	8.0972	5.4815	6.50969
	13		10.8406	4.32937	7.07246	9.30619	6.44382	6.5599	10.4582	10.6867			6.32398	4.81771	3.05478	4.17056	-5.46003	10.948	4.31137	9.90915	11.762	13.4982		13.1494	9.48473	7.07228	8.34526	11.3894	10.5273	0.728752	7.04428	3.52718	6.58187
	13.5		11.1827	4.25368	10.8895	10.3695	4.7767	8.00562	11.8009	9.434			4.404	2.19357	5.83047	4.60196	-8.17787	11.2215	6.12065	13.542	13.0924	15.2747		11.1843	9.23231	5.71985	7.58697	11.4018	12.578	0.838315	7.38732	3.49254	6.48661
	14		10.8981	4.7167	8.09953	9.47419	4.40925	8.08351	10.3136	10.681			6.10365	3.94394	4.31984	6.55448	-7.67875	9.66757	1.80764	10.6993	12.4933	17.6541		14.0478	11.9181	5.93917	7.90067	11.5298	12.5366	2.12471	8.78192	4.98222	6.83877
	14.5		10.0561	4.43268	6.57084	9.83769	7.07665	8.45474	11.1461	10.2454			5.64638	4.59202	6.35949	3.95866	-8.59481	8.04683	4.08983	9.7398	16.7618	15.454		9.8619	9.43793	7.20929	8.03411	11.8932	11.4055	2.87532	7.15331	5.69098	6.37119
	15		10.1247	4.2738	10.4862	7.65393	3.90329	8.65148	10.6635	10.7929			4.91163	7.08644	4.52812	6.57882	-6.93229	9.42512	5.21184	10.4495	16.0292	11.1113		9.51533	7.96052	5.72919	6.6776	11.5501	12.1375	3.69859	6.60382	4.26291	6.85292
	15.5		10.3778	5.40207	9.36911	9.74732	6.92397	8.35915	10.7226	10.3008			6.74537	3.33173	4.05647	6.18897	-9.75598	8.70877	3.7081	10.2711	12.7902	10.7424		10.5409	9.13305	7.27921	7.60478	12.2235	11.904	1.24631	7.30464	3.97835	8.06344
	16		10.8975	3.69356	10.8839	10.8544	5.99564	9.38571	11.231	10.2559			6.12604	5.93441	2.0873	3.30945	-5.81055	10.8352	1.49107	9.84184	17.1148	15.5214		10.7306	9.62563	7.41195	7.20255	11.14	12.2417	4.66858	7.06556	3.59573	7.53623
	16.5		10.5878	5.62433	9.34782	8.35166	6.83132	7.80573	12.5346	10.2524			4.61353	3.31002	3.13236	7.07083	-5.58122	12.4245	2.0261	8.48088	17.4898	13.5103		9.87486	9.49247	8.07995	8.49751	11.4862	11.3687	5.04506	6.5472	5.85469	8.12788
	17		9.96431	4.83263	11.1378	8.97211	7.14884	7.11022	11.4386	10.5811			4.69887	3.82565	5.39631	5.29796	-7.24087	8.98662	4.84557	9.58268	16.8389	13.5111		11.0789	9.43932	7.18374	7.4851	10.7659	13.5069	5.61813	9.92245	8.82092	7.87986
	17.5		12.6155	4.00331	8.88002	9.37687	4.38526	7.64363	11.8493	10.53			4.80145	5.58331	3.76769	4.86253	-9.99951	7.45878	3.33181	10.3632	13.8203	16.0805		9.4083	11.0212	7.70064	7.67794	11.4691	13.4271	5.16158	8.5384	6.09782	7.59952
	18		10.7118	5.46105	9.84091	5.8917	7.42303	7.66395	11.9632	10.1074			5.80631	4.16866	5.39299	6.08648	-8.07154	8.49584	3.55561	13.032	12.7503	11.4384		10.8804	11.0139	7.29941	7.74119	11.36	13.6883	3.56643	7.26257	6.58881	6.262
	18.5		13.3139	6.43184	7.58721	8.56202	6.40853	7.64245	11.5971	12.0224			6.58749	6.30331	5.92394	4.16365	-6.42055	8.51911	5.95404	10.0804	14.4591	13.1582		11.2523	10.5023	6.61327	8.12709	10.3885	13.4054	4.48667	9.07385	4.3787	5.94733
	19		12.5433	5.98769	7.77909	7.20078	5.84425	8.39134	10.8498	9.94827			7.28091	4.2226	3.80525	5.54955	-7.80624	10.1283	4.30629	9.77288	16.4803	13.5703		10.0166	11.605	7.04736	7.76532	10.1975	14.2514	5.51038	9.17532	4.86731	7.20236
	19.5		11.1193	5.78639	9.70171	11.9771	6.48735	8.48233	10.7006	10.9156			6.69295	5.29423	3.34564	5.31468	-7.89825	7.9013	4.33525	8.23682	14.8643	13.2463		10.6027	10.9231	6.80549	8.09844	11.3308	14.1455	6.45365	9.23974	8.43665	7.59952
	20		9.48233	4.80571	5.51626	13.4501	4.64093	9.49107	11.6575	11.177			5.46179	7.85521	5.09735	7.55715	-7.65057	11.7007	2.83069	12.8224	15.2188	17.124		11.3806	12.1149	6.35391	7.633	12.5334	14.2335	6.51462	8.5755	8.2824	6.47668
	20.5		9.58956	5.07783	9.35677	10.3581	7.66274	8.52561	11.2423	11.3848			6.70212	6.98925	5.06392	6.41891	-8.56814	11.0261	5.73221	11.6015	16.0845	11.3043		10.6425	10.6941	8.78773	7.18006	11.9916	13.8893	3.93079	8.7631	6.68365	6.20946
	21		9.66065	6.678	8.39295	13.3962	4.95752	8.99142	10.3688	10.308			6.29205	7.01668	4.64581	5.11228	-6.35441	10.9279	3.72939	10.4283	16.9953	14.9361		11.0661	12.4246	8.30802	7.76086	13.4411	12.7581	7.98555	10.445	4.99053	6.7934
	21.5		11.2597	7.52666	7.39627	12.1313	6.78728	7.76624	12.8876	9.98715			4.61893	5.43079	4.7647	6.97159	-6.62275	11.1497	2.57702	8.40666	14.9211	13.7327		11.0538	11.9157	9.41402	7.5766	11.9266	13.9014	5.74382	8.99677	5.95471	5.99965
	22		10.8232	5.31062	9.19343	7.78117	6.75885	7.41665	12.2589	10.577			6.16613	4.25543	5.36414	5.37554	-7.11095	7.47122	2.10034	12.2118	13.7053	19.2911		10.2173	13.102	10.3328	6.51428	11.5426	14.4785	7.35685	8.36722	8.125	5.56227
	22.5		9.90079	5.33703	8.12483	7.72067	5.54943	9.29977	10.8599	11.2176			5.63204	4.82288	3.63105	3.822	-5.66192	8.8213	4.76861	11.0105	16.9304	18.2933		10.2114	10.3083	7.17497	6.31303	12.8041	14.5202	6.93278	9.04935	9.7394	6.04152
	23		9.51808	5.44919	10.9445	11.5763	6.46222	8.31335	11.0365	10.9345			4.40195	6.10484	3.4077	4.06458	-5.45659	11.6039	4.08009	11.0531	16.9553	12.3628		10.2271	12.1874	8.00066	5.87231	12.8672	15.5082	6.17441	10.2719	9.55187	6.48325
	23.5		10.6323	4.91847	13.3306	8.91725	5.88695	8.22831	11.1756	10.4662			4.64582	8.24211	5.24897	7.15427	-5.58271	10.2688	4.50478	11.5718	14.4713	18.114		11.5276	12.6255	6.32356	5.89011	14.1398	15.0914	3.77386	8.05212	6.17334	6.19529
	24		9.68928	5.45009	9.75905	10.8966	7.27047	7.65651	12.0486	10.3091			4.50003	5.53429	4.43517	5.56503	-9.5954	9.87475	4.79883	13.5693	13.8625	13.873		11.7843	11.4617	7.95681	7.02678	13.3322	13.0166	7.45329	10.2347	8.99451	6.17853
	24.5		10.8994	6.22055	8.71245	10.2801	6.59041	9.65758	10.723	10.3898			5.70573	3.9817	5.39808	4.68601	-5.23336	9.18167	3.52818	13.2781	15.7901	16.0115		10.5837	12.5617	6.32801	6.49429	14.0493	14.3364	6.31555	9.31343	10.1144	6.60396
	25		7.16479	6.49968	8.45679	6.74569	5.90721	7.41665	11.6461	10.9858			6.95265	5.42059	3.44525	5.23865	-6.14181	10.8256	4.45937	10.0145	11.1778	17.7865		11.7842	11.2553	7.77711	7.03503	12.9809	14.6458	9.70408	7.95727	7.44972	5.48893
	25.5		9.22669	5.32681	7.86467	6.78069	6.73277	7.31121	12.7339	11.269			7.25116	5.13834	4.27825	5.574	-8.03788	10.0694	3.34691	10.554	17.0149	14.6994		11.2293	10.4639	7.69973	7.6653	13.6718	14.3804	7.61418	8.76103	11.5531	7.76784
	26		8.24643	5.65978	8.28377	9.32169	7.75374	7.95999	13.0829	11.1			6.58546	5.49218	3.70754	8.23748	-6.162	10.654	4.16197	17.4723	14.4126	14.7064		9.99301	10.9743	8.60681	7.79935	14.7356	14.7978	6.42161	8.03916	8.93072	6.39293
	26.5		10.4957	7.87253	8.22759	9.71983	6.81392	8.21746	12.5862	10.5778			5.80884	5.55529	3.2557	6.67217	-5.09196	9.98564	4.63735	10.0925	14.2507	16.4436		11.7053	13.5381	7.93121	6.34673	14.9814	12.3145	7.5699	8.55082	9.54664	6.92519
	27		8.95301	5.93533	8.68335	9.21161	5.83972	8.72355	11.8402	10.7704			6.66528	7.05732	4.05932	9.04957	-5.57826	12.9806	4.31575	12.9532	14.1105	12.5153		10.4008	11.6815	9.42626	6.68142	15.4879	15.686	7.07458	9.51482	8.18806	6.69781
	27.5		10.6367	5.66125	8.60921	10.249	5.85069	7.61343	11.2143	10.4957			6.7524	5.63628	6.14019	5.95121	-8.41777	11.4356	3.23304	12.6265	14.632	13.6072		11.8996	12.6959	6.79159	5.44267	15.9386	14.3495	8.47564	9.90668	7.76711	6.14159
	28		9.99133	6.22107	11.2559	10.7632	7.00564	8.94675	10.0721	10.0485			7.4727	6.06808	5.3605	5.06467	-4.89653	9.56387	3.22417	11.3697	14.0875	14.667		13.8215	11.3399	8.75264	5.64622	14.5466	13.8417	4.04964	10.3466	7.02604	6.34554
	28.5		9.77688	6.67556	9.66408	10.9752	6.95585	8.84419	11.4773	10.3631			7.14363	8.34399	4.75486	3.51768	-2.32777	7.98209	3.59977	15.7348	15.2194	12.1743		10.5051	13.1287	9.06468	6.23798	14.0204	14.2519	7.1739	9.52632	8.99742	5.36212
	29		8.90867	6.65513	11.0144	11.2418	7.66629	9.35178	11.0977	10.6206			5.18272	6.18274	3.49547	6.91676	-6.18877	10.6398	5.90734	11.4672	14.9631	13.5332		8.82443	13.491	6.82162	6.03379	15.2616	13.9993	7.84955	9.15604	9.05811	5.49406
	29.5		11.2473	5.97995	9.40761	9.37704	7.3694	8.99858	11.2279	9.89742			6.12604	7.93681	6.23037	6.17726	-3.41824	9.19815	2.6309	10.3851	14.8297	13.6066		9.8974	13.6246	9.44928	6.09696	17.0837	15.3986	8.20122	8.84021	6.51518	6.00598
	30		11.4815	7.43809	9.45851	14.3705	5.78761	8.06557	11.031	10.8466			6.71051	9.38281	4.13549	6.94274	-4.28436	9.63111	5.66776	15.7266	14.9098	11.8751		10.2411	11.9285	8.46087	6.08393	14.8601	16.1132	8.81413	10.096	6.34849	5.23804
	30.5		11.0608	6.59881	9.49025	11.4204	5.86574	8.69533	11.0958	10.3517			3.90541	4.89875	3.62302	7.34026	-6.09007	9.80824	4.53578	8.47333	16.0171	14.8696		8.45027	11.8853	9.55395	6.20155	15.2587	13.9008	6.89506	9.1609	6.21408	5.45622
	31		11.842	7.94104	10.9812	10.1107	6.00952	7.43074	11.6223	10.4908			7.11533	6.58327	2.94796	6.43568	-3.11732	8.1538	2.63649	10.3401	18.0839	15.1697		9.26589	14.5093	9.36763	7.00145	15.4804	13.7913	7.84035	10.8299	5.3429	4.67055
	31.5		10.4401	5.58203	9.39887	8.65353	6.28684	9.25783	11.1362	10.6341			7.38168	8.13742	2.97686	4.41158	-4.20257	12.1141	2.79134	9.35418	14.9555	15.5066		9.79354	12.385	9.86901	6.88607	16.5315	15.4785	4.02365	10.1687	2.59396	5.88883
	32		11.2261	7.30956	7.62549	11.412	6.67512	8.33356	10.3591	11.693			4.5625	7.41203	1.55954	3.11695	-4.97278	11.7027	3.41948	8.70714	15.3836	15.6922		11.2071	13.402	9.24623	7.42074	13.9281	14.8402	8.51479	9.83916	6.67795	4.35909
	32.5		11.7749	5.05952	10.0925	9.61441	6.42736	8.12413	11.753	10.5476			6.49408	8.09641	5.48983	3.67394	-2.70584	11.0332	5.74461	10.6902	16.6557	12.4911		9.5841	15.3787	8.19404	7.36488	16.038	14.2075	8.15834	8.9702	6.87235	6.77676
	33		13.3063	5.93718	8.50699	11.1478	9.27184	8.75557	11.4004	10.9598			7.10079	9.98855	3.10245	4.90551	-3.63018	11.7481	5.8343	10.0327	14.4369	9.22248		8.88267	14.9649	7.93789	8.03538	15.7935	14.0231	7.34643	8.01014	3.35428	6.04734
	33.5		14.2391	6.32031	8.44249	12.4678	5.76353	9.00763	11.6863	10.6206			5.81637	10.2487	4.44001	6.16795	-6.81819	11.487	3.28467	9.84895	16.8322	10.6968		10.8576	12.0809	8.84348	7.3728	14.2178	15.0478	9.0434	7.72961	5.021	4.43574
	34		10.1703	5.77926	9.13829	13.9541	4.7158	7.39769	9.93591	10.9809			9.28318	6.18274	4.86654	9.19563	-6.59438	11.4792	2.6432	13.9989	18.3579	16.4831		10.7083	14.8335	7.65007	7.26191	14.6554	16.0647	8.4774	9.51894	3.07181	5.38423
	34.5		12.3742	7.33523	12.7729	12.5966	5.38296	8.50436	11.6695	10.4433			7.07551	9.20442	3.2416	5.67834	-6.9338	12.2199	3.30287	15.0546	15.9029	15.3172		10.6644	13.5136	9.40408	7.16897	13.9321	15.5951	7.4449	9.06774	3.78603	5.07416
	35		11.9723	6.48504	11.0899	8.97927	6.4303	8.25253	10.8157	11.1436			8.70209	8.98173	5.30858	5.41271	-2.05625	8.32678	4.12044	8.83117	15.9761	14.6662		10.8252	14.5247	10.2432	7.88759	13.8846	14.3582	10.9914	9.43559	5.51689	3.68437
	35.5		11.8292	8.05608	12.0786	10.5473	5.83725	8.65011	10.6507	10.9437			5.96198	8.51096	3.72167	4.56928	-6.45448	9.3673	3.91364	7.48955	15.1791	10.8304		11.3235	15.5631	9.65318	6.77726	14.4186	14.9504	10.2854	8.84464	5.62089	4.31581
	36		12.6623	6.34083	12.2942	11.7685	7.2971	9.10842	10.8293	11.3737			6.95836	6.12418	3.71493	5.95577	-7.80791	8.67014	5.12631	14.981	16.1618	11.5273		10.0567	14.3713	8.958	8.35408	13.6987	16.0879	11.1998	7.61567	7.12179	4.47382
	36.5		12.0124	7.62513	10.7489	9.41109	6.59345	8.64095	9.64475	10.0288			7.23647	8.65046	4.66434	5.19144	-2.32861	8.66691	4.45608	7.08307	15.4901	13.5327		10.47	12.6414	8.72395	7.74412	13.2527	16.6806	11.6387	11.0211	6.44623	5.51228
	37		13.4771	5.29818	10.2528	13.6886	8.24096	8.40422	10.3864	10.7619			7.3647	9.74994	4.65507	6.4935	-6.93177	12.8266	4.15578	11.9732	14.5814	13.5609		9.90403	13.9028	8.7338	7.53182	13.6247	16.4299	8.8462	9.44555	7.85549	6.18647
	37.5		11.8406	6.31857	11.5676	12.9712	6.75748	9.24306	11.1305	11.5289			7.98133	7.86277	3.70058	3.99095	-5.43756	11.6683	5.43801	11.7866	16.4064	13.4864		11.31	14.8719	9.72518	8.49276	15.5655	15.9728	9.74637	9.69969	7.16063	5.0176
	38		11.9521	6.16837	9.5065	11.3011	7.97548	8.26618	10.4794	11.12			6.76181	8.95947	2.94476	4.59708	-6.89172	7.49531	3.5888	11.0863	14.3597	13.1171		11.1794	10.369	9.18263	7.30659	14.1486	15.225	9.91584	8.24226	7.02317	6.99054
	38.5		13.234	7.03185	9.85728	9.99436	8.3136	7.67727	11.3188	10.8707			8.20182	8.06854	4.96579	4.25207	-5.31924	12.842	4.3449	13.8545	16.5375	11.1998		11.3441	13.5994	9.95938	7.88571	14.8796	16.0277	9.43097	10.1103	6.90911	6.71078
	39		12.6546	7.22482	10.5709	9.23618	7.97392	8.41068	10.0591	11.0477			7.45643	6.90048	4.47354	4.50546	-1.18125	7.51602	2.98038	14.5408	16.0448	12.8518		11.1017	14.109	10.233	7.32608	14.2592	17.771	9.21693	10.0074	6.63442	7.63471
	39.5		9.57014	7.28968	9.02932	10.4467	8.12598	8.09686	11.0247	10.9906			6.00914	10.0947	5.2668	3.77659	-5.26348	12.4521	4.22046	11.1909	14.4644	14.6804		10.9292	11.5757	10.0578	7.85363	16.5341	16.6442	9.1617	11.5115	8.02938	5.58687
	40		9.88925	6.76143	10.6844	12.9933	7.92967	7.20823	12.2225	10.7818			7.99825	9.12066	4.10867	4.45205	-4.04222	9.55384	2.66081	11.9983	18.6052	11.867		12.5015	11.8823	10.099	8.24952	14.9292	16.2201	8.63263	9.08673	3.1362	5.59216
	40.5		10.6458	6.29498	11.3287	8.12762	7.56869	9.42441	11.5022	9.94105			6.98787	6.28584	4.17802	5.87052	-6.22439	9.79286	3.28799	7.22463	15.3552	16.283		11.1286	11.4155	9.86094	7.30255	15.6584	14.9509	7.76219	10.7896	1.40989	6.62372
	41		12.434	6.90329	8.7431	12.7883	6.15595	7.71439	11.5258	11.472			5.61529	8.93219	3.18159	5.89917	-5.6848	11.1319	4.43753	7.52889	18.9936	15.9681		12.5082	12.6827	9.12085	9.01142	14.4828	16.5247	9.55638	9.27007	2.69784	5.04989
	41.5		11.8208	5.60966	11.2577	9.21605	6.82008	8.81233	12.3662	11.2267			5.96056	7.70335	4.73542	6.99162	-2.62204	10.8819	3.89161	12.7755	18.145	13.3323		13.8861	11.8459	9.65447	7.73116	16.1957	16.7486	9.34778	10.2822	4.94734	6.59183
	42		12.8874	6.50685	9.22918	12.1533	7.61049	9.94637	11.138	10.7708			7.06821	8.75676	7.12575	5.00425	-2.4471	8.59734	4.78498	12.3595	17.3495	13.061		11.8123	13.7645	8.04013	7.50332	16.6753	16.1655	12.878	10.705	4.72123	5.37451
	42.5		15.1981	7.07656	10.42	12.5081	5.34858	8.59674	11.5079	10.9679			5.43492	6.42128	5.42022	2.41361	-7.23615	9.00931	5.04482	9.42887	16.026	12.2981		11.9672	13.5308	8.24953	7.64973	15.4995	18.2599	9.53162	10.4295	6.67067	6.37899
	43		13.6723	6.8868	9.86294	10.7341	6.04884	8.92991	10.2645	10.5058			6.10508	7.22425	5.96501	6.22627	-4.77779	8.34026	4.48654	10.5783	16.4288	7.9266		11.5781	10.0784	8.84883	7.9808	15.2631	16.839	9.09789	10.6081	5.07827	6.9686
	43.5		11.6775	5.47493	9.47158	15.5316	5.50798	7.73505	11.4402	9.93805			6.79972	9.17359	4.8782	5.35045	-4.76499	10.2885	3.82241	16.0279	14.8748	17.1685		13.5298	11.7497	9.60152	8.35205	14.0308	16.9032	11.2011	9.69403	5.85819	6.8569
	44		15.411	6.07231	10.2068	9.56971	5.10248	8.6826	10.1568	9.94329			8.01295	8.20711	7.11641	5.86759	-4.82972	7.15958	2.79134	15.0935	15.8673	12.5683		11.3216	14.9141	9.21885	7.90951	14.5444	16.6292	8.10836	12.1426	2.76603	5.97076
	44.5		13.2666	5.85895	10.6206	10.0846	6.74061	8.12608	12.3051	10.9295			6.83489	10.8354	3.81682	5.94184	-8.36573	9.1956	3.91633	12.3273	19.1746	10.4857		11.0875	12.2245	9.86694	7.80008	14.6149	17.3436	13.6649	11.6115	3.83093	5.00555
	45		13.6505	6.32929	11.768	9.05312	6.2122	8.55573	11.6744	10.3054			6.722	7.89119	4.99482	6.31152	-8.35916	12.1056	3.92686	11.1663	19.3052	12.5283		11.1119	11.2743	7.80022	8.5878	12.9331	16.0389	11.0077	10.4276	2.89865	6.04743
	45.5		9.85075	6.16186	10.0777	8.23619	7.05984	9.03687	11.7429	10.9753			7.82072	9.74785	7.22139	7.13907	-5.63944	10.4061	3.03686	12.7081	16.7433	15.4391		12.0551	14.4974	7.62802	7.96555	13.6439	16.9137	15.2357	9.93636	3.82392	6.96487
	46		12.4513	7.10129	13.3888	12.728	6.27822	7.49218	11.0167	10.9468			7.65325	9.88238	5.55478	5.11033	-2.98204	12.5292	3.37651	14.4442	17.7772	14.6939		11.7149	14.2283	7.52451	8.895	14.6992	18.0093	11.7123	10.9999	5.80505	5.9121
	46.5		13.9487	5.33752	9.26201	12.2709	7.00794	8.89406	12.037	11.075			4.63598	8.61226	6.42843	6.11377	-6.88909	7.99346	4.86492	12.4255	17.1125	14.0583		13.4343	13.45	9.51329	8.79163	15.6272	16.7916	12.9361	12.3984	4.64768	5.70044
	47		12.7787	7.58326	9.61957	12.6379	8.52136	8.15895	11.449	10.7655			4.62268	9.02917	6.93898	6.29774	-9.76683	11.2432	2.84487	13.9602	18.6481	14.607		13.1438	10.0989	7.42244	7.95895	14.5649	16.9091	13.57	9.69388	4.90229	5.37453
	47.5		11.6181	8.06924	12.026	9.89065	6.53267	8.21186	11.3512	10.6654			5.11578	6.9217	4.42832	3.86526	-8.99842	8.91563	3.80865	14.2909	14.1411	13.4226		13.4239	13.2022	9.25408	7.88759	14.4034	17.1727	13.0128	11.028	5.27901	5.80405
	48		11.8929	5.67024	9.91444	8.72993	6.69473	7.4532	11.3279	10.6584			7.55428	8.48653	4.21814	6.6353	-6.74891	9.20411	5.40181	9.78821	16.0355	15.7391		14.5762	14.7556	10.1264	7.95784	14.8014	17.6366	6.72915	10.7872	2.77556	7.33603
	48.5		11.3902	7.59971	11.0835	10.1751	7.93772	8.45155	11.993	10.1674			5.11788	11.3601	4.4806	5.61893	-7.38375	9.91978	2.72904	11.3218	14.6242	18.7545		12.6233	14.7166	8.92718	7.26135	14.2443	17.1527	12.8254	11.7539	5.12741	6.80989
	49		11.0294	7.82309	10.6417	12.8332	8.7577	7.67796	10.3093	10.7234			6.09276	7.80429	5.56015	7.04175	-4.36859	9.82812	3.50858	10.3632	18.8135	18.0136		12.7064	14.6738	9.53993	8.60925	14.7018	17.1812	2.89957	11.0649	3.0218	5.86366
	49.5		10.4649	7.96394	12.5989	9.48148	7.61655	9.09571	11.0393	11.1965			6.25009	10.0722	6.26978	4.71832	-5.73981	10.646	3.1287	11.0046	17.5186	16.6384		14.6102	15.5261	7.51944	6.88726	14.0907	17.0098	1.99226	11.0865	3.7093	6.60069
	50		11.4167	6.49994	10.2215	9.76929	8.72095	7.78761	11.1863	10.4552			6.67438	7.83752	5.66911	4.18401	-9.84264	9.66518	4.98079	12.2902	20.5462	14.1241		13.8075	15.4976	8.40896	7.01754	14.2174	16.0367	5.3112	11.7919	2.25195	6.15451
	50.5		10.8079	7.15365	9.25207	11.6014	5.68183	7.94514	11.0747	10.425			4.50604	7.42846	3.53025	7.17171	-6.38475	13.0538	0.946779	12.0725	15.8056	18.3856		14.4274	13.2257	7.09706	7.65698	13.4603	16.3315	12.5768	12.0799	5.12741	6.16017
	51		12.2778	6.63346	14.1743	11.9857	7.52586	9.75977	10.6056	10.4649			8.01491	8.71736	5.8575	6.5805	-5.98904	8.83357	3.3121	13.3302	12.6385	18.6894		14.2603	15.4751	7.03437	6.46704	13.1855	16.1041	3.21658	10.9619	8.68574	5.62357
	51.5		12.6645	6.38455	10.3898	12.3232	8.75837	8.30795	12.5592	11.0484			6.91209	9.69326	3.5671	0.708894	-8.37266	10.4462	1.91856	6.82776	16.8616	17.1245		13.8503	13.7693	8.68259	6.91137	15.0721	16.0806	3.6491	10.1039	6.27169	6.37511
	52		12.7832	5.92013	11.1898	8.13796	7.92778	9.01644	10.9078	10.7811			6.36469	7.95295	3.58854	1.32648	-10.4251	8.45672	3.4304	11.2208	17.9178	14.981		15.6719	14.1965	8.2312	7.26819	16.3188	16.6009	12.6373	9.88852	4.94888	4.29848
	52.5		13.9802	5.99165	11.9525	7.92681	7.12725	7.93554	12.1548	11.0617			6.75063	8.30376	3.30789	7.50088	-7.88863	9.68608	2.88826	13.0981	16.6207	16.8023		15.2848	14.4058	9.05711	6.23965	15.9317	17.0711	14.2088	9.9624	3.4375	5.69113
	53		13.2728	5.38349	8.48438	10.8188	7.16252	8.30675	10.6553	10.8969			7.99728	8.64824	4.26932	9.15425	-6.64686	9.09671	4.9029	15.9896	16.593	16.5898		15.0242	16.4779	8.04544	7.0164	15.2758	17.1394	1.44676	8.92549	1.79781	6.44715
	53.5		12.7521	6.00811	12.4968	13.6728	7.98153	8.12137	11.789	11.0105			5.61556	8.30158	4.28862	8.23062	-7.91184	8.95962	5.10824	10.7238	17.415	16.5459		16.8576	16.0763	9.43048	6.68303	15.6167	16.2922	12.6879	7.45726	3.22729	8.04289
	54		15.3999	7.36299	13.0169	7.15862	8.31962	7.70845	11.7831	10.6538			6.60129	8.15841	3.27538	4.7333	-8.43599	9.12289	1.94806	13.9975	15.7377	13.933		15.4576	17.8317	9.56131	6.7075	14.2281	17.8866	4.80124	8.95136	6.81387	6.11936
	54.5		14.8221	6.52233	7.74622	7.56144	8.16162	6.78613	11.2629	11.2801			7.76839	10.4026	5.25445	6.68476	-12.6311	11.0827	3.34407	14.195	16.4165	13.3445		18.3714	15.5672	7.99351	5.93514	14.6384	17.8533	11.1629	10.5077	5.77416	6.97541
	55		14.5655	6.04991	11.7683	9.11624	8.64358	8.53583	13.9465	10.6214			7.53287	9.99148	2.13756	5.39913	-8.41052	10.7618	3.89161	10.4283	16.8764	17.5985		16.0302	16.3082	8.36654	5.96387	14.9007	18.1557	3.54566	10.2034	4.83462	5.36185
	55.5		16.6768	7.20171	11.0719	13.3488	5.90429	8.07013	12.3826	10.9331			7.70088	6.49931	3.45523	7.76231	-7.55378	9.06121	2.6309	10.9783	17.6756	13.5503		15.1509	14.7233	8.19124	6.16995	15.9857	17.5469	10.2377	9.35234	2.96303	6.65747
	56		15.2224	6.84666	10.8567	11.0721	6.19012	9.03284	10.6174	10.6374			6.57707	8.43462	4.41937	5.38599	-7.64155	8.99735	3.17122	10.0553	14.5479	12.8346		17.8243	18.7539	8.35278	7.16346	13.0034	18.2107	4.14425	10.1461	5.2207	5.03786
	56.5		12.0854	6.04099	11.6557	9.93413	7.47431	7.74306	10.7713	10.8029			5.95659	8.43809	3.99899	7.35234	-5.30754	7.21042	5.48796	10.7711	16.0873	12.2377		16.654	15.779	7.727	5.9466	14.0661	18.5007	3.7433	9.74515	1.63986	6.39821
	57		13.3573	7.95639	11.6791	12.505	6.95585	7.55486	10.0268	10.3241			6.03949	6.32699	3.28939	6.56374	-9.32776	11.1816	3.64265	13.5834	13.8258	17.3078		16.8691	19.016	8.94035	4.25798	15.0784	19.454	3.89021	9.26886	3.08499	6.20203
	57.5		14.5916	7.65226	11.2658	8.1337	9.27112	8.48113	9.35952	10.2615			6.33068	9.06439	1.74389	6.50019	-5.54013	10.4646	4.24963	9.81203	13.9035	19.9445		17.8205	17.2608	9.85503	4.37152	15.8163	17.7227	2.95711	10.5842	4.65792	6.91036
	58		15.4874	8.10224	15.2532	9.46158	6.78051	8.21876	10.966	11.3634			6.53639	9.31426	4.40372	5.42515	-7.21503	9.75012	1.84825	12.4052	13.9605	15.393		17.7997	17.6365	8.33601	5.20408	14.4637	18.738	5.3329	9.06404	5.07814	5.06455
	58.5		12.6847	9.42095	11.6839	9.43405	7.67739	8.02599	9.65429	11.0654			8.39036	9.04035	1.98274	8.29885	-8.62532	7.66709	2.26801	8.25768	13.9666	11.6341		17.8166	16.5423	9.7042	4.92259	15.7017	18.9906	5.13628	8.26902	5.61295	5.32626
	59		11.6725	9.70525	12.3149	7.88131	9.79516	8.74906	10.8951	10.4125			7.33338	7.38621	3.45234	6.40603	-6.16958	8.25511	1.74117	8.31771	20.6837	17.7551		14.8782		8.92857	6.29076	15.2886	17.2931	3.99714	10.4481	5.34609	6.30426
	59.5		13.4749	7.38961	12.8325	11.0357	9.19337	8.93253	9.80534	10.5855			6.56182	7.78613	3.02561	7.2897	-9.98478	8.23429	1.5703	12.6643	15.6057	12.8909		16.5683		8.04431	5.26425	15.241	17.977	6.08677	9.61041	5.62223	7.57651
	60		11.7519	6.9248	14.3706	11.4156	7.43384	8.69093	11.8087	10.5904			8.01401	5.50888	3.75959	5.51775	-7.48454	11.196	4.4225	9.99163	17.7635	15.9954		15.7344		6.54726	5.27786	14.971	20.1129	4.91827	9.96557	5.45943	6.50481
	60.5		10.3589	6.00627	13.7146	9.03522	6.01191	9.18587	9.37179	10.6451			7.06009	8.38073	1.62726	5.00425	-8.05915	11.6993	3.03071	14.3391	14.0159	16.2848		17.7849		7.95137	6.58797	16.1718	20.672	6.52049	11.2985	4.60114	5.21007
	61		12.7907	5.6087	13.9811	11.2055	8.7577	7.6972	10.6611	10.3636			7.49508	9.58418	1.36106	6.37274	-6.84046	10.1731	3.47696	17.0113	14.9617	15.686		18.9488		8.60582	5.55529	15.8163	20.3073	5.92671	9.6772	6.70537	5.98172
	61.5		14.2929	9.06867	9.61957	9.89646	5.61285	8.04628	9.56143	10.1706			4.38543	6.09656	2.69539	6.30949	-9.49911	8.68801	4.13493	6.30469	17.0317	10.281		17.6981		8.51996	5.36329	17.2158	19.1719	8.40614	9.69413	1.20901	5.65036
	62		13.1767	6.16311	12.1104	9.69423	5.6816	8.43383	10.9982	11.4253			7.68855	5.09236	2.93466	6.35736	-8.28349	7.76285	4.29715	12.2462	18.5575	15.39		18.9285		8.57672	5.72912	16.155	21.4267	5.60426	10.761	4.06965	5.74872
	62.5		14.4379	9.07097	10.1992	9.61099	7.13512	8.68072	10.3036	10.6873			7.5108	7.72035	1.77426	4.92883	-8.89197	10.0233	4.66514	11.9605	17.8749	15.092		16.9192		9.86094	5.19066	13.4509	19.5355	7.84753	10.1834	5.69556	5.51672
	63		13.7341	8.47761	12.5205	10.4858	7.97392	8.82526	12.4916	11.2787			6.71192	7.18071	1.22084	5.48499	-5.1981	9.57669	4.73514	14.9526	16.6074	19.3135		18.0301		7.5948	5.33672	14.9782	21.1091	6.26819	9.38823	1.14375	4.10144
	63.5		8.90489	7.92579	9.68267	14.5924	4.64235	7.57369	10.5751	10.0505			6.84785	4.43337	3.04036	8.32743	-7.33393	10.3557	5.09144	11.7599	18.9502	13.4103		16.909		9.54768	5.21304	14.7482	19.7658	4.90593	9.12919	5.10344	4.68879
	64		11.4305	6.65941	15.2396	12.4378	7.05243	8.69649	10.8482	11.0251			8.1875	6.23535	3.13048	4.85235	-7.09712	10.2192	3.79585	9.4311	15.5139	16.2328		17.4547		10.4588	5.48474	15.1708	21.2583	4.31205	9.29652	3.49834	3.92306
	64.5		10.5368	7.99026	9.86551	12.9646	8.89764	8.68522	9.41155	11.188			6.64629	2.9649	2.92175	5.16341	-4.62578	9.90889	2.80446	12.4255	19.1071	11.5701		18.9675		8.21095	6.24246	15.2375	19.9319	7.30905	8.27995	4.98562	5.36693
	65		12.7727	8.01484	8.17812	11.5378	7.77586	8.89011	11.3989	10.1446			5.5972	5.92474	3.23499	7.68889	-3.93816	9.18303	3.48159	6.71258	19.6169	14.1944		19.2498		8.932	6.18879	14.5971	19.3354	6.83956	8.06193	6.74937	5.29851
	65.5		12.1732	6.26856	10.3508	13.9268	7.41953	8.53256	10.0786	11.03			6.99537	6.45456	4.29631	7.90133	-6.19532	9.46386	4.4225	11.7409	17.9976	19.4455		19.219		8.47726	6.04992	16.946	20.7346	6.6072	10.3336	8.65152	5.25522
	66		11.6633	7.86395	9.57973	11.6684	8.77151	9.58629	10.8224	11.0448			7.23555	6.06665	1.92187	5.25536	-9.9568	10.119	4.18875	8.94966	17.5232	17.814		19.6116		8.4344	6.70117	14.6959	20.9001	4.34472	8.63678	7.05352	4.13909
	66.5		12.3354	8.1992	10.1545	12.2839	10.4337	9.10388	9.36445	11.1142			8.04214	5.88054	1.03729	6.90508	-7.71671	10.1567	4.70345	12.562	18.2712	16.6664		19.7862		9.96848	6.43555	14.791	20.8936	7.49482	10.4316	6.63795	3.94229
	67		14.4829	6.87054	8.93633	13.137	8.32506	9.1285	10.8115	11.0303			7.31823	1.5567	3.93634	5.58103	-3.08036	10.1796	4.57138	9.53077	19.1149	14.4268		20.122		9.50538	5.67914	15.2928	19.3941	6.41899	10.3684	2.37803	4.84582
	67.5		15.0105	9.21856	10.4186	14.4087	8.69486	8.45993	8.30132	10.218			6.04923	5.36351	2.25242	6.79208	-8.04728	10.6808	3.36929	8.01459	15.6013	16.0228		20.5549		9.0461	5.68149	14.8596	19.1421	6.27907	9.44259	4.76353	5.88355
	68		10.9286	8.39613	8.87808	12.9483	7.91149	7.06284	9.55936	11.3419			7.5354	3.57053	1.98731	6.33887	-6.3423	9.72002	2.26213	10.5522	16.9964	17.9232		18.0748		9.26145	5.41874	15.1397	19.5559	5.07966	8.92896	6.15555	4.81926
	68.5		12.716	7.58582	8.80013	9.06185	7.40032	7.85925	10.1678	9.92303			8.78072	5.7901	2.4099	5.8496	-8.80456	9.2914	4.0568	7.94873	17.7222	18.178		18.7595		11.1297	7.21193	14.467	19.1335	5.07974	7.2487	4.23254	5.28998
	69		11.5691	7.05507	8.28162	7.57718	6.88977	8.57246	10.7658	11.1312			7.03988	6.18168	3.46237	7.44915	-7.70793	9.81179	3.65161	11.5027	18.6587	14.2447		19.0357		11.2609	5.27183	14.9079	21.3456	5.84038	7.85644	5.28423	5.46807
	69.5		12.2554	10.3631	7.89322	9.141	8.56295	7.55033	10.4313	10.8414			7.83744	3.77264	1.77426	9.08976	-7.48454	12.3276	5.82578	10.7278	17.946	20.0927		18.7901		10.1799	6.18334	14.874	20.9622	8.08994	8.3668	6.54559	5.24121
	70		11.907	9.75864	9.6606	8.85601	8.47869	7.04189	11.0094	10.6211			7.63264	1.33971	1.5881	8.94854	-7.05376	9.37241	2.22668	6.31282	13.8324	16.1486				11.2948	5.50346	13.818	19.4464	7.28897	10.985	6.0134	5.0403
	70.5		10.7477	8.74357	11.0023	7.81852	7.38242	7.43854	10.8174	10.6344			5.97537	0.846212	1.37055	5.49286	-5.43958	9.8407	4.92889	9.14287	16.2757	16.7709				11.6952	6.70919	14.4306	20.6354	9.34686	10.5488	4.54452	4.30025
	71		16.2844	7.58187	9.21533	10.6667	8.11388	7.45093	10.6269	10.9526			8.22791	2.8273	4.13849	7.53769	-9.50336	11.6579	3.17939	10.7622	20.7639	16.7698				10.2101	6.57304	14.6059	18.8864	6.00272	10.597	6.13612	5.64688
	71.5		15.1655	8.19719	11.2527	11.691	6.09695	8.07924	10.2489	10.7431			8.07909	6.33869	1.82702	6.9183	-5.91189	10.2179	3.80956	11.9152	18.6826	19.2029				12.0029	5.538	14.6911	19.2249	7.76302	9.24279	4.48343	5.85304
	72		13.1693	8.91092	11.1869	10.127	8.92311	8.64263	9.67321	10.5847			5.94206	5.13083	0.545772	9.28986	-6.88725	11.4587	4.73514	10.5558	18.4147	15.7725				12.3618	5.0998	16.1137	19.3792	8.06625	9.64357	6.71212	5.84723
	72.5		11.3983	7.96048	12.4746	11.1859	8.54379	9.27618	10.3891	10.1532			7.25054	1.70403	2.3394	6.06713	-11.1822	9.40166	5.24581	12.1328	18.4861	16.6903				13.1883	5.40022	14.5106	19.4444	8.22354	9.55327	4.19688	4.13568
	73		11.8988	8.99696	10.5007	14.2667	7.30152	8.59838	10.5798	11.8301			7.78118	2.7743	3.58831	7.22772	-11.6226	9.00548	4.94357	13.4329	16.5945	17.2138				12.8346	6.06306	14.7481	19.9421	8.0582	8.54384	4.65752	4.35759
	73.5		12.6609	6.70706	9.55768	12.2537	8.10134	8.36552	10.4985	10.5257			6.48093	3.46877	1.30326	7.77377	-10.3357	10.1131	4.42981	14.8972	15.372	13.8331				12.5124	5.73692	16.0073	17.5927	7.80907	9.13657	5.65968	6.33391
	74		11.5163	7.70397	13.2303	10.4913	8.56061	8.35221	10.3729	11.7026			7.19223	3.62537	4.90847	7.77961	-9.50955	10.2706	4.60444	11.1384	14.6481	17.9386				12.6048	6.0614	15.824	18.7087	8.43956	7.274	6.91753	5.94444
	74.5		11.6261	9.72486	12.4307	12.8255	6.89565	8.1044	10.0847	11.2914			8.32474	2.01023	4.49557	7.30643	-11.7804	9.25646	3.24273	11.3105	16.9304	16.1338				12.2755	6.32036	16.1248	18.1587	6.84063	10.3517	7.40543	7.07189
	75		14.2792	7.78681	7.94167	11.2628	7.05536	9.63502	9.85143	10.3257			9.5397	0.266768	4.68631	8.11242	-9.85188	7.41121	4.39287	13.1044	15.0589	13.1173				12.7804	5.13203	17.6799	17.8628	5.68866	9.59262	4.4662	7.03095
	75.5		13.3659	8.40895	11.3739	11.9781	7.21041	8.61647	11.3112	11.2365			8.51503	-0.44962	2.41535	6.0274	-8.22402	11.0155	5.73724	11.87	18.1557	15.7035				11.5199	5.8201	16.1157	18.5169	7.07005	8.24226	7.32392	6.22823
	76		11.8448	10.0764	10.2347	13.633	7.48644	7.86322	10.435	10.6049			7.52876	0.389186	2.34785	4.7287	-8.82149	8.71437	3.77505	12.039	18.9957	16.2765				13.1079	6.36118	17.2738	18.4331	10.2188	10.7727	7.22985	4.85019
	76.5		16.027	9.80135	8.32345	11.7188	11.1649	9.05607	9.61898	12.1504			9.08639	0.236979	3.58411	4.40758	-7.06733	8.82852	5.65906	9.03662	15.6245	17.966				13.5725	6.53011	16.4214	19.6657	4.37597	8.8472	9.78683	5.78811
	77		14.8804	7.54656	11.278	10.8703	7.87013	7.77541	10.214	10.8897			7.37355	0.241632	2.21977	8.11083	-8.28009	7.56199	4.81512	10.7361	16.0076	19.8575				12.2693	6.61076	15.6076	19.5717	6.79491	10.4133	5.31435	5.36176
	77.5		10.6636	8.21919	9.30375	12.3064	7.91073	8.04935	9.05571	10.9614			8.53436	0.801466	1.98294	5.69546	-8.72982	9.80475	3.96568	13.3672	16.3568	15.4207				10.9347	6.76046	16.4629	19.0125	9.15321	10.0101	6.38691	5.41613
	78		13.4639	8.54925	8.65632	12.0932	8.42631	8.64513	9.24187	10.8233			10.3148	-0.7113	2.87211	7.21903	-8.757	11.4405	2.57702	13.2888	16.9263	16.9027				12.9138	6.6573	16.5744	17.7128	6.60229	10.7013	8.237	6.27263
	78.5		12.2497	8.84224	11.4573	13.5738	8.4694	7.713	10.2449	10.6991			7.87315	-1.65336	-0.58856	5.61463	-7.43817	9.81457	3.17195	12.2001	19.3281	15.1004				11.0163	6.29389	16.7366	19.3833	9.31865	8.81821	9.78486	6.15004
	79		10.6821	10.0203	11.6156	11.8161	7.95351	8.80269	9.71088	10.611			9.03018	1.21596	3.1466	5.28546	-7.87291	9.22368	4.56397	7.70911	18.0519	12.3284				12.1818	5.25172	16.6305	19.3394	5.37188	9.57021	7.807	6.45179
	79.5		11.0475	8.84925	9.24997	13.4775	8.30294	9.64252	10.252	11.351			7.47163	-1.7851	5.09564	6.53872	-9.37034	10.4964	3.88154	14.3844	15.592	14.684				10.9737	5.16002	14.8652	20.378	3.92578	8.92726	8.69881	5.54591
	80		13.3572	10.7911	7.57736	13.4495	9.6301	9.76813	9.30982	11.1738			8.174	-3.34988	2.37116	6.46632	-7.58236	9.64768	1.87313	10.0697	14.5252	18.6842				11.2973	6.34567	15.4671	18.7838	5.03349	10.2655	5.957	4.49198
	80.5		11.7281	9.06799	8.03768	11.9983	9.92816	8.68313	9.61067	10.8005			6.90462	-4.09836	2.04962	7.81694	-11.5121	10.2975	2.9183	8.01102	17.4283	20.7257				11.7902	4.96749	17.018	18.1721	4.9297	8.95008	6.90785	5.69398
	81		12.0961	10.7276	8.95943	11.9922	9.36295	7.93845	8.01147	10.4988			8.1064	-4.2268	0.628966	6.46062	-7.05624	7.58828	4.04893	9.22213	18.0143	16.9094				11.6064	5.15186	17.0755	19.3138	5.04506	10.6987	9.92263	7.9595
	81.5		7.80217	9.8625	10.4116	12.6739	10.2041	9.31621	9.53602	11.4443			5.63289	-5.81252	2.4598	7.48598	-7.68124	9.14192	3.54233	7.64872	17.5647	17.4948				11.2417	5.58826	16.036	20.1506	6.12464	9.78477	6.81247	7.17528
	82		9.0271	9.31791	7.62104	9.63304	6.33956	9.06098	7.89662	12.0677			5.92459	-5.4592	0.917865	6.67851	-9.19836	8.28325	3.81352	7.93446	17.4451	13.9511				11.8834	4.48764	15.3784	19.964	9.17936	11.1756	7.76848	8.4898
	82.5		10.891	9.60545	11.8955	12.6984	8.36312	8.36939	8.82074	10.9888			7.26943	-6.46914	2.23259	5.19817	-10.6936	9.44923	4.35109	9.73154	17.5575	15.5364				12.5296	4.59482	14.9115	18.1347	5.3654	10.3317	8.30354	6.22752
	83		14.1109	11.7751	8.89906	14.8769	9.26416	8.50591	11.2223	10.8102			8.35525	-7.91817	1.94817	2.35324	-7.95436	8.92608	4.63618	8.23452	16.1702	16.2926				10.3403	5.0109	16.9246	17.1257	5.99206	8.64647	9.23455	6.66015
	83.5		11.451	10.3246	12.4035	11.8562	8.32859	8.88909	10.2494	10.231			8.04463	-6.34127	3.20488	6.41452	-5.99426	10.7247	5.37418	10.9017	17.9845	17.79				11.7393	5.6417	16.3214	18.1925	8.14465	9.85263		5.41573
	84		10.7276	10.7408	10.9846	9.77563	8.51198	7.718	9.39368	11.0025			7.61609	-6.93206	1.47438	7.31203	-11.015	11.27	1.53494	8.45583	15.3552	13.3907				11.5538	4.85658	15.6841	18.1312	10.7457	9.29291		6.6143
	84.5		11.1509	9.73767	12.0749	10.5825	9.76946	8.10667	8.97063	10.7101			8.51027	-7.49747	1.26025	7.61683	-6.58552	7.61592	2.6733	10.7516	18.2917	18.3852				12.3575	4.67426	15.2028	18.2436	10.8375	9.0888		8.15583
	85		11.442	8.38484	10.8095	12.7383	7.32478	8.35525	9.49141	11.2756			9.08278	-9.30655	1.94996	5.20873	-9.44597	9.44093	3.4555	10.1468	18.095	15.2747				11.8616	4.98892	15.6762	18.2979	9.1465	7.20455		8.65101
	85.5		9.85418	8.74863	10.1184	12.7556	7.8595	9.26811	9.07542	9.76681			5.27512	-10.1389	0.641479	6.96941	-9.00806	10.1829	2.49578	10.781	18.5575	9.08368				10.8628	5.76837	16.28	16.5782	6.63655	9.63089		7.89774
	86		9.94936	8.36461	10.302	11.317	10.2374	9.79079	8.83541	11.1756			9.18076	-9.57222	2.12043	8.78272	-9.31488	8.01571	3.25295	7.45239	14.8977	16.8867				12.9794	6.6419	16.4663	16.6737	9.38019	10.607		8.60434
	86.5		13.5098	7.19358	11.8646	11.679	8.79032	7.17989	9.61607	9.80918			6.94512	-11.5388	0.811773	3.41656	-11.1118	12.3318	2.75608	10.2126	17.9795	16.8605				13.1306	5.49732	17.0638	16.0427	8.17299	11.5279		8.44285
	87		9.91451	9.86273	10.4561	13.1541	7.95369	8.34241	10.6099	11.3062			6.64117	-10.523	3.36901	5.72161	-13.3325	10.857	2.85931	10.7032	15.2786	15.093				11.4309	5.57899	16.7699	17.0044	9.89767			9.97729
	87.5		10.5832	9.9054	10.4865	13.2726	10.3457	8.23765	9.7687	10.4017			7.6363	-11.9795	3.2888	7.61912	-13.1702	11.2106	4.92445	9.01803	18.0287	16.3948				12.2877	5.42744	15.8943	17.3179	9.91102			6.57302
	88		12.9906	8.58896	9.2622	14.0403	8.99837	8.6664	10.506	10.2859			8.26091	-12.7884	2.29467	5.07304	-14.0082	9.73485	5.41795	10.914	18.9128	16.6132				12.0747	4.62634	16.3579	17.0009	8.72812			8.27969
	88.5		12.7438	8.90399	11.6126	13.6707	10.6449	7.99592	8.55636	10.4955			7.6231	-10.5642	1.65735	5.59947	-17.1344	8.80504	3.8318	11.6462	16.011	20.2875				13.5147		17.505	17.394	7.44607			9.21463
	89		16.1498	8.94999	11.2898	11.0421	9.04348	9.54932	9.4381	10.6301			10.5015	-14.8313	2.0851	6.14862	-14.7223	9.79571	3.71679	11.6164	19.7955	18.3792				12.7578		19.3231		10.2793			9.29883
	89.5		12.0613	12.4461	10.6993	11.3826	7.88003	8.76049	9.72064	11.3786			7.70664	-15.2097	2.93616	5.84584	-13.6076	10.0512	3.31907	4.88111	18.3658	14.7632				11.308		19.6641		5.84038			8.82707
	90		12.9506	9.47341	11.0488	10.2443	11.3767	9.00958	9.90916	11.4134			6.70976	-13.0533	2.34986	4.87493	-12.7197	9.48573	2.25371	10.7652	14.8047	11.3153				13.2135		18.9093		9.96801			8.88094
	90.5		9.09457	10.3506	8.04692	7.64129	7.64248	8.74809	8.6756	10.5476			7.66738	-12.9609	3.59988	5.66871	-13.854	9.49434	5.06852	10.1842	21.057	14.2697				14.9199		18.2012		7.97615			9.72369
	91		9.38375	9.15743	12.2568	11.8299	9.72219	8.29023	9.77968	10.1458			7.94726	-13.7118	2.21058	5.43453	-17.1196	11.1312	4.5033	6.61868	17.0504	15.7535				13.8437		16.7343		10.2909			8.8502
	91.5		10.9572	8.18641	9.87366	9.72417	8.17534	7.85664	10.0413	10.56			6.79479	-12.485	1.18736	7.37989	-13.2527	9.91375	4.38025	8.85322	18.4197	16.2219				11.8357		18.2703		7.27757			8.83563
	92		11.3235	9.50254	11.1255	14.0097	8.66836	9.61371	8.47998	9.94156			7.5133	-15.008	2.28913	6.21457	-16.0131	10.2151	5.34459	8.86395	16.1846	14.031				12.3301		16.7271		8.77208			10.3536
	92.5		9.84946	9.6629	11.8608	12.9876	7.703	8.15289	10.273	11.6			7.47865	-12.26	4.56541	3.42137	-17.1953	9.94017	2.39889	12.5497	18.2407	13.6424				13.7202		18.2899		7.46753			9.97539
	93		9.48377	10.5326	11.9507	12.0774	7.10074	8.88715	9.37918	11.4057			8.36048	-11.9503	2.4298	6.84156	-15.193	10.0302	2.39035	8.96517	20.3496	13.061				11.6353							10.2522
	93.5		10.0125	11.6771	10.8916	8.50398	10.4461	8.36912	8.83604	11.4238			6.23958	-11.1293	3.64971	7.29719	-11.3474	8.69584	2.91068	5.88699	16.6772	15.5225				13.7461
	94		10.5393	8.36112	12.4035	9.60923	7.91206	9.62033	7.17761	11.4614			7.2087	-9.35487	2.93466	5.57474	-15.763	8.14045	2.35852	9.82423	15.687	14.1241				12.8811
	94.5		10.5794					8.51338	8.87791	10.4545			8.57398	-11.4125	2.27105	5.32713	-14.184	10.9944	2.72564	10.5336	18.0448	14.419				13.3025
	95							9.68896	7.95493	10.5543			8.00124	-12.9732	3.14554	7.999	-13.5744	10.2477	7.02782	12.1518	16.3156	20.0231
	95.5							10.1484	9.73911	11.6348			8.3929	-12.2796	3.46456	6.99416	-16.3173	7.79638	4.44926	8.07641	15.7866	12.5432
	96							8.74114		11.4199			7.01784	-10.0033	2.72492	5.91779	-14.8877	9.59238	2.91348	9.62387	16.9609	16.3786
													7.22482	-10.6078	0.713576	7.86566	-16.0823	9.56239	2.40039	13.0311	17.2025	18.3233
													7.19648	-12.3175	0.642226	5.65722	-14.7744	7.8209	3.94152	5.77887	16.3983	13.8656
													8.57398	-10.7982	4.21134	7.25632	-13.8071	10.9684	2.75608	9.9685	15.5769	15.3079
													8.95327	-12.6632	2.04996	6.4227	-17.0505	8.96345	4.03263	8.2907	21.47	12.2233
													10.7898	-10.322	3.58154	5.97676	-5.99426	9.28971	3.96362	10.6918	20.4307	17.8313
													8.84195	-9.98843	3.70572	5.74127	-11.015	8.87373	2.89389	9.42118	15.3528	16.3879
													9.5272	-9.21613	4.14746	6.45154	-6.58552	11.8708	5.10824	8.91995	18.5998	15.8686
													10.1292	-11.4644	2.59417	4.05071	-9.44597	10.3398	2.59307	6.59707	19.5154	15.1103
													8.17077	-13.3208	0.769494	9.81953	-9.00806	15.8044	4.50199	9.60985	19.4707	17.4018
													9.05372	-11.6718	1.92792	7.79449	-9.31488	8.67987	3.38157	8.63661	20.1297	19.4237
													10.1202	-10.3364	3.80449	5.992	-11.1118	9.53244	2.81454	9.80124	17.6864	12.6607
													9.70218	-9.97982	2.93428	8.68254	-13.3325	8.91594	2.39368	7.45398	15.391	17.9165
													10.4475	-12.12	3.3294	8.07261	-13.1702	10.1121	1.45533	11.4462	18.8068	17.49
													7.95889	-13.2144	3.59116	8.39235	-14.0082	9.55139	2.52151	9.14287	15.0469	14.1426
													10.1181	-11.6623	2.31887	11.2383	-17.1344	9.81378	1.94716	6.57662	18.6316	14.1687
													9.41807	-13.6133	2.36827	8.00161	-14.7223	11.2107	3.07492	6.90509	15.797	14.4906
													7.97765	-11.3631	1.53831	9.03599	-13.6076	11.2514	2.14052	8.02692	16.0703	15.4639
													8.5505	-9.98426	1.3297	3.85835	-12.7197	10.6677	3.777	11.3939	21.5512	15.2173
													8.91249	-11.2702	1.8058	3.89311	-13.854	9.97742	6.41992	12.2563	17.2945	20.6687
													7.99038	-10.6233	3.11568	8.54516	-17.1196	9.78757	2.96555	8.68748	16.8502	19.7481
													10.2163	-11.0529	2.51072	5.5071	-13.2527	10.0844	2.027	9.53077	18.837	17.6224
													10.1561	-10.0962	3.20601	7.92485	-16.0131	9.94876	1.57282	8.94674	18.1409	21.4716
													8.05947	-10.9561	1.23239	6.15751	-17.1953	8.88853	1.10962	10.3427	19.0371	20.4919
													9.02765	-10.6466	1.99256	9.54075	-15.193	10.9709	0.867212	9.65583	17.0642	22.5162
													8.17563	-13.2182	4.6536	5.92465	-11.3474	10.4561	3.13559	11.0785	20.2396	19.9053
													10.4398	-10.366	3.8822	8.25334	-15.763	7.65366	1.65025	8.60945	16.2869	22.5676
													8.94521	-10.9515	3.98593	4.55058	-14.184	9.5616	4.17568	13.3522	16.087	17.3905
													8.98559	-10.8485	2.15786	6.23221	-13.5744	13.1402	2.24928	9.91483	16.7433	19.1692
													7.97055	-10.1889	2.98098	6.51032	-16.3173	9.93587	2.93004	9.29699	20.2735	23.944
													9.24964	-11.759	3.5252	5.9231	-14.8877	11.6749	2.93556	8.58094	17.244	19.4623
													10.5992		1.17404	6.33498	-16.0823	10.4557	2.29852	7.86872	18.104	20.3454
													9.80603		3.29925		-14.7744	9.40105	3.00372	17.416	17.776	20.6091
													8.11648		2.85997		-13.8071	10.6031	2.88039	13.1089	19.3205	18.4219
													7.31086		2.82479		-17.0505		1.92425	9.08784	18.9686	23.6081
													8.67804		1.34764				2.64854	9.36671	17.7752	27.0917
													10.6571		4.15353				1.41309	8.75983	18.7543	21.7663
													9.05372						1.33493	7.91779	17.7222	18.2411
													9.80595

## Sheet: Figure 3 - sup 1D
unc-44:gfp KI in VNC	wild type	unc-119(de3)	unc-33(mn407)
immobile fraction	87.6899	92.604	82.7899
	91.6118	100.032	83.9964
	89.2444	97.2125	89.3208
	88.7187	93.6791	94.1464
	91.8605	109.343	84.2591
	91.51	90.2631	81.3228
	89.977	96.2592	92.9678
	89.163	89.3373	90.3388
		82.9461	94.3574
		84.1492	93.7873

## Sheet: Figure 3 - sup 1E
	Time(s)
		wild type							unc-33(mn407)					unc-44(grt2)
		w1	w2	w3	w4	w5			w1	w2	w3			w1	w2	w3	w4	w5	w6	w7	w8	w9	w10	w11
	0	0	0	0	0	0			0	0	0			0	0	0	0	0	0	0	0	0	0	0
	0.5	5.91876	5.91876	5.91876	2.61391	2.71653			7.25236	-0.07363	1.54802			9.20095	15.6455	10.498	5.56172	13.127	8.26515	12.1483	10.3161	14.9637	13.618	9.56697
	1	7.60365	7.60365	7.60365	2.4434	7.32109			14.1167	-15.7728	4.34683			10.7352	19.4568	10.0868	16.4532	13.2449	11.2552	21.5754	14.8713	26.0198	17.0938	13.9858
	1.5	10.2461	10.2461	10.2461	2.74669	5.53448			12.0722	-1.9928	6.48142			22.5912	19.9352	11.423	14.2918	22.1764	13.1527	28.9429	19.5453	24.0777	26.5034	16.5992
	2	12.863	12.863	12.863	3.2534	7.6767			20.1562	-9.10832	7.84687			26.3651	22.4141	22.4031	18.0643	21.3194	19.6769	34.539	24.0462	28.7466	29.566	21.0937
	2.5	9.10747	9.10747	9.10747	4.40742	6.93917			24.3096	-1.07486	9.24884			23.607	21.9736	33.8966	28.4156	25.0807	21.1955	35.1733	26.7169	32.8501	29.9926	21.3161
	3	13.4068	13.4068	13.4068	4.144	7.33197			18.9412	2.77126	8.5155			26.3589	23.7192	29.4247	23.2109	16.3279	23.9965	40.5215	29.2149	42.7999	30.147	24.1001
	3.5	15.2653	15.2653	15.2653	5.40958	5.28261			21.5918	2.09867	14.338			27.049	27.119	35.4068	23.8654	20.9546	31.6784	38.348	34.1617	42.7978	31.1247	28.4173
	4	14.1757	14.1757	14.1757	5.40998	8.63243			18.3893	2.41263	14.4389			28.3791	25.4132	33.4676	30.8294	31.7229	28.0016	37.4158	34.6568	40.5697	41.7504	28.5808
	4.5	14.909	14.909	14.909	5.88097	8.76502			22.2291	-2.79258	15.8338			29.4701	27.7117	33.6786	27.3562	28.9503	30.7845	45.9321	30.0625	47.9834	38.6289	33.6052
	5	19.1491	19.1491	19.1491	6.23135	9.67812			21.9752	6.29578	12.833			27.9011	26.7646	36.9265	28.0558	35.933	26.5713	49.7107	34.8097	46.0528	39.3111	35.2327
	5.5	17.7909	17.7909	17.7909	5.57231	8.32423			20.5483	13.6105	15.0183			29.3029	32.1909	39.3249	26.2523	37.9489	30.0878	46.0675	31.4958	46.1654	42.775	37.7105
	6	14.8192	14.8192	14.8192	5.62344	8.67754			22.0857	6.25354	15.9434			35.7509	26.3348	42.1191	30.3972	36.5572	32.0046	50.2246	32.325	45.7856	40.8467	43.1873
	6.5	14.2649	14.2649	14.2649	6.5104	8.23499			23.7603	6.39834	13.6521			31.079	31.4501	47.3571	35.1339	35.6465	32.8669	50.4836	39.5952	44.6334	41.5337	37.0826
	7	12.8668	12.8668	12.8668	6.05989	7.64498			19.4567	20.4478	9.95465			31.5622	32.0876	38.1707	34.6598	36.753	36.5484	51.0282	41.2582	48.3246	45.2875	39.307
	7.5	12.502	12.502	12.502	6.22283	10.5452			21.3531	17.9151	14.2638			37.5932	33.5117	32.9704	31.6876	40.011	38.6834	56.6809	40.6007	51.9906	46.5304	39.0694
	8	14.6059	14.6059	14.6059	7.09677	10.3351			24.0574	7.18217	12.0854			47.929	31.4919	33.5643	25.6745	35.1001	36.4487	56.8	42.178	53.3601	41.2105	40.4563
	8.5	16.1723	16.1723	16.1723	7.22224	10.7988			20.1607	7.77842	16.176			42.8308	33.0457	37.4736	41.8199	35.88	37.9015	55.5984	37.6295	59.7388	47.371	38.6909
	9	15.3022	15.3022	15.3022	7.57658	10.1159			21.274	-0.55697	16.8213			41.8207	36.3879	40.4284	35.1408	38.8557	36.3167	56.7228	30.3224	57.4948	45.986	35.4451
	9.5	14.6154	14.6154	14.6154	9.08781	8.48889			21.4463	21.314	18.0555			38.889	38.213	39.3246	24.5682	38.8434	41.4067	60.8043	40.5349	61.1292	45.3561	39.2483
	10	16.117	16.117	16.117	9.08006	11.3248			25.0095	19.5343	13.7204			37.8272	33.9007	50.9083	28.2445	31.6332	43.1199	59.2545	42.2322	59.5212	46.133	40.4361
	10.5	16.5783	16.5783	16.5783	8.82931	10.5331			22.0335	17.3526	17.5784			35.2142	37.8965	43.8433	41.7676	38.156	44.8257	60.8837	44.0345	62.603	41.3612	41.9115
	11	18.4986	18.4986	18.4986	9.24348	10.1213			22.2073	29.1955	17.0792			41.5767	34.9652	39.2098	40.2659	42.177	46.1516	62.4911	43.3546	59.8027	49.8487	38.1124
	11.5	16.8122	16.8122	16.8122	10.4412	12.7555			28.4917	8.07979	20.3476			40.4834	31.6805	39.7909	41.9248	34.6363	44.2891	68.0949	45.4684	55.9424	46.9269	43.5506
	12	19.1801	19.1801	19.1801	9.53691	12.6775			24.6522	16.2598	15.9275			42.9301	33.0113	37.4164	43.3268	44.5095	42.6935	58.7866	46.6311	59.6381	46.3082	39.8579
	12.5	17.2971	17.2971	17.2971	10.8875	12.5758			26.412	16.0017	20.406			42.1412	36.6949	45.1052	45.0883	45.1813	45.2139	61.8311	51.5664	58.1277	47.5493	42.8149
	13	17.7387	17.7387	17.7387	9.5434	11.2083			24.9672	20.189	19.2556			48.5289	40.4922	39.2053	45.9402	50.9345	38.304	62.8726	47.6116	53.9237	49.3263	43.0903
	13.5	18.5167	18.5167	18.5167	9.57386	11.307			28.932	29.2918	23.833			38.2999	40.774	45.7238	42.536	49.8238	40.3433	65.2794	49.9645	52.2866	50.3262	44.536
	14	19.6711	19.6711	19.6711	10.6173	11.2023			31.4166	6.02646	18.645			49.3313	34.432	41.8274	52.1268	51.0193	41.5873	67.7492	50.7544	59.5482	49.7686	43.6399
	14.5	20.2915	20.2915	20.2915	11.9005	12.0177			29.9816	12.407	20.6261			44.4399	35.2045	44.7215	42.8952	56.9679	42.0492	72.623	54.5721	55.8092	51.1882	42.4077
	15	18.8455	18.8455	18.8455	10.1141	12.4906			26.0842	0.612179	18.1373			45.4275	43.1478	43.4947	50.4559	50.4605	42.6275	76.1803	53.1519	62.8713	51.4831	46.2583
	15.5	17.1898	17.1898	17.1898	11.6094	12.0114			28.2334	34.9081	19.2117			49.7329	42.8201	47.4292	46.7206	51.4111	46.3268	77.137	48.8779	60.6431	56.8109	47.9666
	16	20.6602	20.6602	20.6602	11.9002	12.6803			26.1852	14.2609	17.9352			46.9306	42.2111	52.1718	46.8774	45.2724	43.5763	80.7026	48.1731	58.209	56.4514	49.2354
	16.5	21.8279	21.8279	21.8279	12.2755	13.0986			26.2727	25.9743	22.6829			48.8116	41.4087	43.4696	38.1646	45.632	40.6074	79.8478	47.418	60.7281	52.9055	48.2846
	17	20.0162	20.0162	20.0162	12.5785	11.9673			27.878	21.7168	22.6247			46.8157	37.1166	51.3142	43.8568	51.1618	48.8337	78.9103	47.9162	57.0792	55.261	49.0772
	17.5	20.4435	20.4435	20.4435	11.2876	13.6017			25.653	27.5036	28.7925			43.6298	43.8012	50.2663	51.4667	42.0319	43.6166	68.5537	52.5911	53.3828	50.2615	47.1398
	18	22.5076	22.5076	22.5076	11.464	14.6289			31.3686	20.4305	21.7732			51.5048	43.0374	51.8616	46.7534	46.8007	47.4753	74.3659	44.6067	64.222	56.9486	42.8327
	18.5	24.5384	24.5384	24.5384	12.4006	12.5815			34.4243	23.457	26.7594			44.3214	45.6054	44.8802	44.5222	48.1861	50.3392	72.6539	50.4733	62.6672	55.716	45.2253
	19	22.0055	22.0055	22.0055	11.913	16.0157			29.5134	25.0471	24.2451			48.1168	48.4166	44.7512	46.5981	38.0191	42.5233	73.9312	48.4012	61.8678	58.8854	45.6612
	19.5	19.9588	19.9588	19.9588	12.9486	14.8559			25.7657	17.7691	26.751			50.2866	46.8209	52.9136	53.5815	46.9075	47.9613	71.8945	49.2945	60.8648	50.6654	48.7065
	20	22.8026	22.8026	22.8026	13.9065	15.5814			31.7874	37.8364	25.7179			48.7227	50.2078	52.4532	56.9372	45.0972	51.0808	73.9189	54.0006	66.8238	60.447	55.7839
	20.5	20.6209	20.6209	20.6209	13.5589	15.2294			28.1523	19.7981	24.8169			48.5099	48.3447	44.3258	54.9615	57.3127	48.2851	81.3854	54.2689	60.8955	53.0312	50.302
	21	19.3549	19.3549	19.3549	12.9179	14.4138			27.7247	23.34	27.563			51.0362	44.2746	50.7048	62.1557	47.2525	50.0115	73.8199	51.7812	70.1847	54.5871	55.1669
	21.5	19.9201	19.9201	19.9201	14.1232	14.5373			26.0049	15.0619	19.6171			50.6288	39.1816	42.5866	58.9463	49.9027	48.7147	77.4417	55.9495	68.9822	53.9175	52.8086
	22	23.0948	23.0948	23.0948	15.3136	14.2989			28.5539	32.093	22.726			54.7872	46.0763	42.1722	58.9463	51.9569	50.2072	70.2741	60.0719	66.3745	54.8795	51.3133
	22.5	22.8436	22.8436	22.8436	14.9844	15.9762			30.0274	18.7433	21.6057			44.2634	40.7245	47.7111	49.8283	53.5016	47.0592	77.2976	57.509	66.9838	63.1277	51.8591
	23	21.8242	21.8242	21.8242	14.6391	14.8044			31.1549	27.8222	27.2343			57.3233	44.9771	47.5601	57.1153	55.4649	49.438	86.0279	54.8718	67.4668	58.3527	51.1564
	23.5	23.6476	23.6476	23.6476	13.9552	16.2777			31.0914	19.5064	30.4611			60.7807	50.8516	39.6976	53.1437	58.2898	50.4421	81.0723	53.8625	63.2609	56.8972	52.8639
	24	19.7076	19.7076	19.7076	13.0252	16.2339			27.8006	21.1934	25.4479			55.5466	42.0369	49.9067	58.627	45.302	54.0973	77.2488	54.7522	61.9026	58.8935	51.997
	24.5	19.1485	19.1485	19.1485	14.0067	17.1039			28.7226	19.4503	32.8062			47.6792	41.7976	53.5412	59.7802	44.2547	48.2755	76.8241	53.6851	63.909	59.0243	49.2224
	25	19.0833	19.0833	19.0833	16.4401	15.4475			27.7514	17.2811	28.2185			56.6459	43.7108	54.1163	49.3701	51.7209	56.7843	75.7958	55.6504	60.0632	61.0429	51.5029
	25.5	19.4916	19.4916	19.4916	15.957	14.7373			30.5076	19.2046	25.9239			55.2988	49.1563	54.9017	53.2632	54.1304	56.2614	71.3737	53.616	65.5439	70.1325	50.7497
	26	18.7533	18.7533	18.7533	16.9092	16.8311			31.6243	30.0209	30.3002			59.2684	39.3501	53.3952	57.6581	49.0969	57.6774	81.4389	55.6557	64.2368	68.2472	53.7455
	26.5	20.9796	20.9796	20.9796	17.2639	14.5468			28.7061	29.5689	27.705			54.6354	46.2715	53.5925	50.6588	49.6746	50.6412	75.8995	55.27	55.0639	68.1774	54.1402
	27	17.9546	17.9546	17.9546	16.3206	15.9217			27.9995	34.8491	31.9746			41.8816	40.9252	48.4568	56.4219	41.8395	52.3397	83.8954	57.2335	63.0963	61.8929	49.3355
	27.5	21.0125	21.0125	21.0125	16.4039	17.7797			30.1648	30.5735	30.2442			46.4404	41.5068	54.7664	48.0326	45.9405	57.1087	81.7833	57.2053	60.8831	66.3311	47.4985
	28	17.2301	17.2301	17.2301	15.9676	15.9096			30.0459	27.1415	27.0081			46.7753	45.8213	53.1817	52.4128	44.7735	59.2552	76.2254	54.1699	63.6705	63.0338	45.959
	28.5	18.7922	18.7922	18.7922	15.2652	18.3281			32.1386	24.7784	27.1157			47.2436	48.4936	49.9718	50.271	51.9605	59.2928	83.5578	61.45	67.8644	61.2066	49.9262
	29	18.5529	18.5529	18.5529	15.2806	17.074			31.8382	22.3073	27.8259			51.1169	47.3004	57.3678	56.8126	51.0507	57.798	81.3854	57.4354	72.368	60.5345	52.2661
	29.5	18.2199	18.2199	18.2199	16.4889	17.1773			31.3736	27.1086	30.8469			51.0003	48.1564	55.505	54.0316	44.0702	56.7623	81.0084	61.1653	67.673	59.8623	54.8367
	30	18.6646	18.6646	18.6646	18.6112	18.7761			31.8926	19.6594	29.5205			50.3497	45.1729	46.7244	60.6844	41.7069	56.8621	80.1688	68.3111	77.3685	66.7201	53.1228
	30.5	19.7036	19.7036	19.7036	19.0139	18.8591			32.844	21.1478	27.9618				51.2409	62.8199	54.8469	65.8856	59.4879	71.0852	63.193	74.6052	66.463	52.1724
	31	19.4385	19.4385	19.4385	17.6906	14.4858			30.6805	29.7106	29.3108				46.6557	58.3697	56.3652	55.6209	62.4549	73.5449	60.5403	72.5108	67.618	53.425
	31.5	20.3286	20.3286	20.3286	18.6362	17.8571			31.9174	29.5715	29.9222				54.6678	51.7171	52.5147	52.7659	61.8337	79.5129	63.8186	68.6696	63.411	49.8659
	32	18.3716	18.3716	18.3716	19.1276	17.2438			34.5652	25.334	31.1125				54.987	52.2656	56.7967	47.9993	63.7486	79.853	59.9878	70.5245	64.8653	53.0834
	32.5	18.3487	18.3487	18.3487	19.8135	16.1578			31.6531	34.5293	31.7513				46.2763	51.5625	61.8727	59.9498	61.8802	87.027	60.02	68.5594	60.0084	56.852
	33	17.3865	17.3865	17.3865	19.9235	18.1147			34.3708	29.6108	29.0409				40.1414	48.8624	57.7912	52.8735	57.4225	85.8657	56.2494	68.1131	59.3258	56.911
	33.5	19.0698	19.0698	19.0698	18.1692	15.4344			36.5387	28.108	28.8139				46.6569	59.4826	53.3857	54.0802	61.301	97.9227	58.4471	71.757	63.611	54.8934
	34	21.8443	21.8443	21.8443	18.4814	18.1538			33.5742	28.0865	28.4952				44.7793	58.4354	55.1052	55.9961	59.4005	88.3259	63.1812	77.4767	59.9765	56.5224
	34.5	20.2382	20.2382	20.2382	21.0503	16.6127			33.6112	34.5559	26.0685				48.2709	58.1184	72.9184	57.5044	55.9151	90.2143	57.8047	74.5529	60.1223	55.9002
	35	21.6647	21.6647	21.6647	20.2501	16.7537			32.0533	35.3375	28.3516				44.6559	45.2103	56.3868	57.586	54.5195	85.1113	60.4331	67.7302	63.3938	59.2277
	35.5	21.9464	21.9464	21.9464	19.5049	16.5474			33.0939	36.6514	35.7492				43.9579	59.5808	53.008	61.111	51.3111	85.4532	64.5479	73.5323	62.1262	55.5944
	36				19.9014	16.2276			42.489	27.5016	29.0041				48.2971	58.1746	57.8265	59.4993	54.2453	86.3983	68.8568	80.7619	64.1137	55.6168
	36.5				17.5375	16.7113			34.9778	39.7139	36.3483				42.1215	63.2152	67.8907	50.0055	57.3461	89.454	73.0094	76.0861	66.9445	62.9159
	37				19.0554	17.4182			32.6186	34.6154	32.3029				45.9837	57.6504	72.0073	61.0819	60.9544	92.083	65.65	72.5445	66.3436	58.0992
	37.5				19.0345	18.18			33.5867	44.0504	32.8883				45.7253	53.5613	71.1426	60.6869	53.8138	82.1541	74.1467	77.6901	65.5752	60.5699
	38				17.6196	18.6226			30.8462	27.5171	32.434				45.9926	58.4699	68.1748	58.3787	54.6049	78.8996	68.23	77.2856	63.9877	51.7049
	38.5				18.5237	19.2181			31.8086	42.0934	30.1712				54.4358	61.074	68.2298	56.4101	58.2707	83.6525	67.8403	80.6028	66.8974	58.9499
	39				20.2457	19.2823			34.127	22.9027	25.9792				52.713	52.9808	72.3609	54.2075	57.3913	81.2477	63.7236	80.2999	67.311	54.8563
	39.5				16.2164	16.9414			30.7561	34.7483	31.0737				41.3888	55.5328	65.5255	61.8903	58.9628	90.3945	69.9209	70.9219	62.7445	54.4773
	40				19.5598	18.3515			34.524	29.8459	32.3682				49.1125	52.8655	66.8879	59.8728	56.316	91.2778	67.9315	76.6327	65.283	54.8975
	40.5				19.8912	18.0118			35.6779	39.1343	34.2391				48.736	54.1472	55.4804	64.2815	56.6126	88.6023	73.3973	73.1313	69.2795	57.9831
	41				20.2925	18.6692			45.7492	37.8055	32.0783				47.4746	56.6774	60.3536	65.01	67.8928	88.1397	68.5687	69.5898	67.8075	54.3979
	41.5				21.5429	18.1827			31.0284	34.069	32.2384				54.0865	56.9471	50.5399	62.5677	63.6646	84.512	73.1079	79.145	74.0384	56.9609
	42				20.6799	17.3717			33.3183	26.5388	33.5814				52.4641	58.9656	58.7773	67.9805	60.331	86.7679	76.8325	73.7285	65.2786	56.5987
	42.5				20.8825	17.088			31.6674	35.3999	28.6132				55.7041	65.6773	56.8593	54.8499	59.1754	88.8519	74.953	68.3167	71.8718	54.3931
	43				18.9447	17.3548			34.657	16.7683	29.9368				55.194	61.2435	57.5841	67.5879	56.7944	86.7853	67.7189	70.4989	60.8863	55.4388
	43.5				20.1642	18.0681			34.1421	36.3668	34.3764				49.4956	57.5439	77.2197	65.9742	65.5027	86.9178	72.5013	71.9888	64.8468	53.7698
	44				19.8612	18.2833			37.0668	23.287	32.1219				47.2052	54.7501	60.167	59.0807	66.0711	89.1891	70.1458	69.1478	67.7617	55.4261
	44.5				18.8279	17.6028			43.7775	32.9965	31.1776				55.3523	69.3114	59.7872	55.2357	69.947	87.2848	73.6644	66.9817	68.5019	55.4371
	45				17.8834	21.0439			47.156	36.3849	33.5288				53.4413	73.0718	68.0298	64.5647	67.2608	91.8343	75.0071	61.1466	72.3534	59.4224
	45.5				18.5099	18.5312			41.7852	30.5835	32.4782				42.605	67.0227	57.6772	63.252	63.0283	86.9998	77.4928	70.7124	69.2052	56.8082
	46				18.0598	19.3579			35.9608	31.1688	30.2797				59.5284	63.3864	47.3971	70.719	56.0818	82.6	75.3731	77.5506	73.5251	60.0973
	46.5				19.2628	19.3709			46.5224	34.2627	36.4475				53.1865	64.7606	65.5349	56.1341	57.0784	91.0791	76.8284	68.6036	70.6885	64.0135
	47				20.4073	18.7001			43.7078	23.853	34.5831				50.4744	79.0839	56.3492	57.9926	62.2318	85.1882	66.8641	68.6677	73.1074	59.6156
	47.5				20.7947	20.6068			40.1565	28.0844	38.1594				57.9489	64.7771	50.8315	57.4625	61.9481	80.7973	74.2592	69.7177	71.6015	55.7941
	48				21.3255	18.1371			36.5991	28.0666	34.6334				53.7101	61.1474	58.665	56.6198	68.2563	80.8851	76.1814	73.6729	72.8115	58.6129
	48.5				22.2572	19.3087			38.4378	39.2084	30.3318				59.1832	75.5555	64.2648	59.5301	64.168	77.418	76.6249	72.6062	63.9639	58.2702
	49				20.1747	19.5599			38.6957	39.5462	37.9866				52.6988	66.1388	62.1446	48.6457	59.8957	84.174	74.5991	69.6082	67.9012	61.1363
	49.5				21.0268	19.2994			53.5951	24.7013	40.1445				63.689	75.8744	58.0398	57.643	65.6575	90.2085	65.6094	75.2687	70.62	60.8054
	50				20.0893	18.4838			44.9531	33.5961	38.7416				58.1486	74.7907	59.7192	61.8006	65.8	86.3174	67.0772	76.6091	72.4997	58.1441
	50.5				19.4007	19.5859			44.9674	33.754	36.2239				56.7311	65.2545	52.8066	69.4557	63.0337	72.9539	70.2224	76.7058	67.1448	58.3944
	51				21.425	20.7876			35.9706	21.1123	35.8288				55.4305	68.437	59.7988	54.3034	70.4702	78.7947	72.4072	73.7584	71.2268	66.1772
	51.5				20.5675	21.2792			38.0597	36.3087	36.2495				52.2133	72.1523	55.4534	44.6942	63.0254	76.5351	77.2384	69.5464	69.9899	61.3979
	52				20.4853	20.0894			58.5791	31.5562	32.8153				60.0538	62.782	69.1308	63.7965	63.4234	81.7263	76.1329	73.9201	72.1385	61.3259
	52.5				20.2772	20.457			46.4262	32.2324	33.8117				66.8832	63.9192	58.7473	67.0136	63.7688	82.1386	73.5602	74.4203	65.3823	62.3775
	53				19.926	21.1833			37.2708	27.181	34.4809				64.6752	69.3445	50.0409	58.3889	60.2422	83.002	74.8469	70.0585	71.5681	57.0029
	53.5				20.4995	19.8991			35.812	29.574	37.3612				57.928	59.1487	52.2264	72.0073	65.1776	74.7949	75.9919	76.0438	63.1682	62.2169
	54				20.7075	20.0297			34.0336	36.4174	35.6927				57.5906	62.42	43.223	62.0917	71.5001	72.0579	75.2802	74.4561	61.3101	59.1558
	54.5				20.0935	21.2378			37.2923	30.9727	32.8769				60.7136	65.8523	61.6437	56.7269	70.4185	75.6882	72.2106	71.2407	65.938	61.6934
	55				21.2624	19.7874			35.9997	40.2971	36.2767				54.5941	65.3929	55.5134	67.4422	66.6371	78.487	79.2549	75.9736	64.3799	63.5964
	55.5				19.8014	20.4442			38.863	30.2416	40.0231				64.3346	69.1363	63.4709	60.3724	71.3327	75.0067	75.7716	74.6233	65.7699	62.8681
	56				21.5438	21.2354			47.1056	24.3275	37.1506				65.1625	62.1157	56.6692	63.7376	81.4948	84.7503	70.2957	76.1598	72.6746	66.2598
	56.5				20.9237	21.506			37.6282	27.1728	39.0473				62.7056	66.1195	60.1645	63.396	72.5052	81.9476	75.4531	74.7039	74.7238	67.3306
	57				21.9593	24.7213			37.2949	23.394	37.9764				62.9468	60.1189	63.8006	60.8586	69.5929	83.6771	79.4511	74.1569	67.9893	65.2631
	57.5				21.8712	22.8414			48.6901	29.9961	38.3113				56.3437	58.6761	51.02	56.2614	66.7924	84.5266	78.8194	73.3113	70.5814	65.0215
	58				24.6754	23.94			35.6729	25.5502	38.653				58.7662	69.0316	54.135	56.7959	68.6025	80.1955	82.9087	75.8735	69.4906	63.9516
	58.5				21.7099	22.2605			37.2893	27.0962	40.2228				53.4678	71.5047	63.5341	69.0337	63.4555	89.5529	76.5001	76.747	71.4804	64.2084
	59				20.2373	22.2317			36.2675	24.3247	39.3534				59.3883	67.5005	67.3659	64.3485	65.5365	80.8818	79.7939	76.2497	78.8928	61.611
	59.5				22.2591	22.4246			38.1288	44.4552	36.2525				61.6082	64.6935	58.9842	73.1425	68.6727	77.036	79.54	76.5445	71.3316	63.3977
	60				20.7588	24.7924			36.8491	26.8558	41.6424				67.2201	64.424	61.2796	57.0403	67.5659	83.3858	68.4139	72.1647	71.4167	64.2442
	60.5				22.5185	22.6341			37.447	44.4647	39.8501				66.8039	65.3088	59.3414	62.5144	69.8189	81.9104	72.2221	79.3873	66.2625	60.6679
	61				21.91	23.964			41.7816	34.5692	46.064				63.4963	64.337	58.0103	67.5984	68.8431	77.0894	71.7169	78.1773	73.7686	66.9372
	61.5				22.8557	22.0307			40.0083	29.6442	36.377				60.5137	72.704	56.0999	67.3457	65.8546	88.1869	72.9723	78.2662	65.8003	66.6983
	62				24.025	22.8373			40.4563	33.5224	41.7927				53.8507	72.6008	56.3663	63.1887	61.0603	85.3704	66.1281	76.4613	72.9556	67.8362
	62.5				21.3586	22.6934			40.321	28.3986	40.3849				60.7802	73.8495	56.9575	61.8601	69.3952	78.0119	74.4855	73.9542	69.3946	69.1166
	63				22.1493	22.1362			39.0744	23.0516	42.2524				58.0483	65.7891	56.6419	54.8591	67.8753	74.1757	76.8448	72.8547	68.3041	66.3008
	63.5				22.3938	22.8244			43.393	34.7201	43.6136				63.8292	62.7124	62.6919	69.9654	74.0737	74.9862	66.9663	74.4399	69.6563	65.8368
	64				22.1678	22.6003			45.1611	33.4911	43.6715				58.5067	64.8289	47.3999	67.3507	77.9014	81.6764	69.493	79.7219	75.357	70.1624
	64.5				23.462	23.4063			39.3987	50.6894	42.3757				63.1787	87.2178	50.788	60.6759	66.9734	81.6673	68.0474	79.4614	72.5668	63.7331
	65				23.9926	20.9376			37.4105	43.7917	39.2763				58.2747	62.7567	65.643	62.3422	68.4095	74.4307	72.0118	78.2349	81.6247	65.8329
	65.5				23.0164	22.4338			38.9956	42.444	39.1317				55.5439	75.5088	46.0191	70.4998	72.064	78.0952	68.6515	78.5037	86.8144	66.9956
	66				23.0468	22.8527			37.9094	20.5895	44.7085				54.4852	71.7192	51.7648	64.6128	80.5006	71.7746	74.6641	74.9918	80.5332	66.6192
	66.5				21.8381	21.6368			37.9467	32.3119	42.2151				53.0034	73.2493	63.4701	70.4481	75.1897	79.0784	77.8488	74.7787	75.402	65.2078
	67				23.4591	21.6145			41.6278	31.7698	39.7489				59.8544	65.7822	59.8821	73.5178	79.8567	80.2572	77.8321	74.7351	74.83	73.6747
	67.5				22.6558	21.3544			42.5073	38.6045	43.061				62.2607	67.3546	45.3122	69.5665	77.2596	76.9811	81.9832	75.2184	78.7598	68.2385
	68				22.7608	22.7458			37.8372	28.0707	49.023				58.013	68.7429	66.2185	73.9855	79.9755	85.8375	81.4767	85.4043	68.6348	62.6657
	68.5				25.1862	22.619			43.1653	22.602	38.72				59.5412	60.3262	67.2501	65.8714	78.3091	77.6984	78.3758	70.3877	76.8376	65.364
	69				23.3467	24.2862			44.0003	28.0942	39.3186				54.0527	76.0767	53.2053	67.3871	72.2224	75.5946	80.3636	75.0323	77.3135	64.0527
	69.5				24.8191	24.3356			41.9648	20.033	40.4851				56.9334	73.0725	57.2988	66.0293	70.6161	81.7567	84.0121	75.9585	83.764	61.9961
	70				24.7716	23.9764			40.2882	23.9719	41.157				50.9213	69.4835	66.1809	55.8551	80.6115	80.3504	73.6076	80.4637	86.3925	64.9788
	70.5				24.7832	22.6802			44.7682	28.6931	41.8402				52.2431	68.2728	47.8171	53.7655	77.1749	76.1249	77.0948	81.0878	73.165	63.6857
	71				22.8597	24.6156			42.9379	27.1999	40.1564				52.1635	73.545	49.519	73.7759	76.9845	72.4363	79.1838	78.0959	74.5688	61.8612
	71.5				25.999	25.7019			46.3321	31.6663	46.2159				57.8818	75.7655	56.9631	58.0544	75.5009	75.2001	74.7947	74.5879	75.844	65.1339
	72				23.1099	21.9858			42.0452	27.0022	43.6574				61.078	66.943	60.5145	54.6371	71.1061	81.3199	81.2227	71.1182	72.8838	63.4306
	72.5				24.0563	22.6243			42.5898	34.3374	45.9923				54.7984	62.655	61.6437	66.7478	79.6718	79.3193	79.6233	70.7311	76.0805	62.8537
	73				20.4635	24.5504			43.2831	31.2154	44.3148				56.6426	60.5632	63.1825	65.9684	76.7675	78.7932	86.0733	73.969	77.5471	63.1318
	73.5				23.1889	22.729			41.349	33.6568	44.5692				59.9713	62.1655	54.4566	64.7306	79.0357	79.2954	87.3168	76.6612	79.864	66.4174
	74				24.5324	23.0434			46.1986	31.3055	43.8518				56.0854	61.9732	58.0748	55.7195	83.6435	76.1804	85.9328	73.1313	72.4329	67.0954
	74.5				24.2971	24.471			41.5801	22.6222	42.8129				53.6617	55.6087	63.1073	54.0213	80.6783	79.1806	82.5719	69.8735	81.7468	69.1746
	75				24.8824	23.1169			45.7968	25.2148	47.0881				64.8603	65.8142	67.4618	69.0857	82.9462	77.3541	81.648	71.9186	79.7622	69.8796
	75.5				23.7951	21.8063			46.9278	21.211	48.1444				59.1568	58.9463	57.1012	67.0136	81.3952	77.8724	85.7992	75.1332	82.589	69.6445
	76				25.6416	21.5991			48.3395	15.9902	47.4673				62.9787	62.7632	75.8732	65.7976	70.4813	79.3553	84.6649	74.8405	79.8696	63.2327
	76.5				24.4942	24.3513			44.1003	20.3675	43.4258				50.7137	57.7522	65.362	60.6174	82.6079	76.0842	85.3646	69.4438	80.133	66.0607
	77				25.4614	22.5307			41.5253	23.1462	49.3228				60.2934	74.1695	62.5024	55.9834	83.1708	75.4951	87.6143	68.7067	73.6967	64.5184
	77.5				23.8862	24.6793			43.6259	13.6457	48.0734				53.4013	62.2189	56.6834	56.0791	75.5981	81.4605	85.0373	75.2749	77.9359	67.6255
	78				26.0104	26.5663			41.7076	28.9247	52.047				61.6895	77.7612	51.9466	74.6028	79.8176	76.4483	90.1825	70.9936	78.4874	61.5941
	78.5				25.1264	24.7219			56.1632	30.4786	46.4713				59.8427	67.8265	63.0125	54.868	78.1695	73.3847	84.1999	74.2464	72.6492	65.4702
	79				24.825	25.6487			47.7355	23.7277	47.6972				65.4638	71.6468	70.5505	50.1347	75.8679	75.7802	84.6785	74.0201	76.5176	64.3813
	79.5				24.7016	22.7954			43.837	35.8356	48.0139				66.0058	74.6913	66.7987	60.4838	81.6369	67.0831	84.7716	69.9351	80.203	64.194
	80				24.9372	23.0764			40.1017	33.8467	47.8072				54.3624	75.7376	59.1555	60.5243	79.1074	77.7931	86.0482	74.4807	82.9272	68.1611
	80.5				26.7656	24.0452			41.673	30.1353	44.3434				54.816	68.2046	50.738	58.454	79.0991	77.5858	85.958	79.5713	76.0936	63.7893
	81				26.1741	22.4301			43.4376	19.3681	45.6588				55.8072	69.3756	44.1431	64.2382	85.868	82.3496	90.1639	80.3175	75.9737	64.6995
	81.5				26.026	23.6167			42.7839	13.2046	45.6434				55.1145	63.9163	61.3978	59.9393	86.7531	70.7211	84.5894	75.3295	75.7296	67.5418
	82				27.7707	23.5315			49.6936	28.3986	47.7974				60.1561	62.295	44.1283	59.6973	81.4445	67.2613	84.0001	75.5103	79.2405	67.836
	82.5				26.3218	24.2738			44.0743	14.1666	46.399				61.5579	65.3657	61.8331	69.8165	80.386	71.8285	84.687	74.8431	74.7238	68.6878
	83				25.0827	25.8115			40.8794	25.5496	46.8107				61.2269	62.8507	53.0124	56.6198	81.5075	72.4162	82.3189	84.0361	85.5948	66.9953
	83.5				25.7322	26.9141			47.2277	23.2819	41.7201				52.7421	67.7596	51.4531	66.1098	79.2162	71.4541	84.552	87.7721	80.9966	67.1287
	84				26.1645	24.8002			52.6588	20.6653	50.4894				55.7469	71.72	51.4649	58.2886	79.7024	67.8139	84.2602	79.6501	82.7879	66.1715
	84.5				24.2939	25.8815			45.2781	29.4191	44.7295				57.4622	59.8741	60.8328	69.537	75.6256	74.2274	74.7364	80.1868	79.5868	70.977
	85				24.8565	23.9409			42.1438	29.6017	51.4364				48.9556	61.0395	63.8647	58.8245	73.5312	73.2735	88.0931	83.1148	78.3837	72.1994
	85.5				26.4965	23.7512			42.244	18.0416	45.1144				63.2143	78.86	58.9188	69.9194	77.2056	68.5555	80.4818	74.7196	80.4318	71.9986
	86				27.6597	24.0289			42.196	32.6391	50.7361				53.4189	72.1175	62.4027	67.6513	75.6436	65.1395	78.6071	78.2485	80.884	71.2394
	86.5				26.1327	25.211			47.4854	18.6516	52.5915				57.7549	61.6057	60.8077	73.3722	86.6376	65.8518	83.1064	86.3318	90.9658	67.3774
	87				25.7561	22.6704			42.5241	27.7214	46.3508				54.78	66.9912	64.5885	67.6286	75.6615	69.8757	73.9422	88.8052	77.5598	60.9057
	87.5				25.7864	23.0215			45.0616	15.0971	46.355				57.6577	61.979	49.9001	66.2885	83.0514	71.4945	77.0583	89.6355	82.7773	68.9977
	88				27.2852	24.543			48.3657	11.5365	47.7984				64.4097	62.3773	62.4748	71.2729	75.6161	66.2681	80.9718	87.3221	82.827	67.2476
	88.5				26.8349	23.3548			49.572	31.0137	46.1403				62.625	69.3298	63.1422	67.0739	75.4281	76.6331	80.7953	90.692	85.8932	65.6357
	89				27.4708	25.4244			47.2811	20.9727	48.0967				55.8409	56.815	66.9089	71.7302	76.3654	71.349	80.4395	80.2346	78.758	71.7639
	89.5				26.842	25.077			46.3158	9.19177	44.3154				64.5221	62.1486	62.7709	69.8022	77.9449	73.1314	72.3545	81.325	76.2786	74.4758
	90				27.9387	25.3223			50.0032	20.651	49.715				58.7407	53.1671	57.9256	72.2568	81.7601	73.0718	73.5524	76.7198	76.1834	70.3487
	90.5				29.0082	24.1249			47.5439	14.7771	44.4057				58.9649	68.19	68.1483	84.1495	80.266	74.695	76.9648	81.6066	79.907	63.5471
	91				26.541	23.4871			47.6312	16.8029	40.2863				60.7481	70.5466	64.392	71.4884	77.9785	70.1587	81.9142	79.1649	73.6386	68.7278
	91.5				27.4096	26.1618			43.7265	22.8965	48.0709				63.1521	70.8124	67.5639	64.2212	80.105	75.1002	82.8175	76.4339	69.1199	68.4621
	92				27.5957	24.5179			46.2323	29.4759	52.5245				56.2895	73.3779	64.1064	65.432	78.0164	74.341	81.569	81.1029	72.3955	71.9251
	92.5				27.4556	24.1619			50.9183	29.1348	46.3464				64.1183	61.9341	51.1096	81.3127	74.7238	78.1789	84.3174	79.0337	73.7777	72.8093
	93				26.727	27.1096				32.6989	48.7862				66.1635	66.2837	59.4676	68.9504	75.3539	69.3487	77.9553	85.2302	81.6894	71.7647
	93.5				27.0967	25.5036				31.5186	43.9685				63.8108	76.5291	58.321	79.5802		74.1766	82.6542	80.682	72.9693	67.719
	94				28.7108	24.8229				26.5717	48.197				62.8861	77.6634	50.1553	79.5889			88.7749	87.7082
	94.5					25.0247
	95					25.8213				36.6998
	95.5
	96
	96
	96
	96
	96
	96
										28.3986
										28.3986
										28.3986
										28.3986

## Sheet: Figure 3 - sup 1F
immoblie fraction	wild type	unc-33(mn407)	unc-44(hrt2)
	75.9866	57.0727	41.0699
	76.7602	72.3088	32.8519
		56.7863	41.4273
			35.3479
			25.2631
			23.2881
			21.0524
			22.9969
			24.5666
			34.1242

## Sheet: Figure 3 - sup 1G
RAB-3::mCherry axonal enriched (%)	wild type	unc-33(mn407)	unc-33(mn407);unc-33M:GFP	unc-33(mn407);unc-33L:GFP
	100	0	0	80
	90	10	0	100
	100	10	11.1111	80
	100	0	20	80
			10	80
			20	100
