# Supplementary material for: Cortical anchoring of the microtubule cytoskeleton is essential for neuron polarity
Source: eLife. 2020 Apr 15;9:e55111. doi: 10.7554/eLife.55111 (PMC7159925; doi:10.7554/eLife.55111)
Supplement: Figure 3—source data 1. [file elife-55111-fig3-data1.xlsx]

## Sheet: Figure 3E
		ALM								Amphid						VNC
time(s)		w1	w2	w3	w4	w5	w6	w7		w1	w2	w3	w4	w5		w1	w2	w3	w4	w5	w6	w7	w8
0		0	0	0	0	0	0	0		0	0	0	0	0		0	0	0	0	0	0	0	0
0.5		9.04912	6.54599	13.9466	10.6375	22.5833	11.1112	14.7412		1.63213	3.3482	0.798091	2.66508	-0.23033		3.44082	1.6831	4.36223	4.01103	3.1595	2.99159	5.52116	6.07821
1		13.9553	12.0641	18.7123	17.7655	34.4257	14.0011	17.8065		4.2176	8.33108	1.45893	2.25396	0.847531		4.83965	1.78034	8.89765	5.60655	5.10784	3.89667	7.34397	7.10353
1.5		16.366	13.6351	21.2725	14.2239	38.4357	12.7155	18.0397		6.61408	6.97878	1.60943	0.53546	1.90555		7.07887	1.78336	9.59999	7.02605	5.29265	6.71561	9.50901	7.55677
2		18.1272	15.7357	24.8503	14.0281	34.0938	21.5432	24.0024		9.83972	7.78125	0.818881	1.58488	2.70639		7.26957	4.4048	8.77484	7.5154	6.34034	5.61717	9.83523	8.42066
2.5		18.7591	15.9585	26.3465	16.1483	37.7864	19.6504	21.8352		10.4191	6.65459	2.27727	4.50655	2.35855		8.06743	4.78053	9.34273	5.02927	6.8957	7.55364	10.4173	10.3585
3		18.9716	18.6145	26.6078	18.3167	37.2326	21.735	23.7979		5.30933	5.64083	1.81514	2.55782	3.84492		7.44981	3.85933	8.41958	6.46612	7.01175	6.29783	10.3988	9.57888
3.5		16.8653	21.9068	31.8503	19.7273	33.8301	17.8744	24.5512		7.85539	6.92161	2.49914	3.21418	1.75158		7.83519	1.28027	8.90775	4.51872	5.4696	7.72482	10.8284	9.67133
4		16.5869	20.5496	33.5092	19.1455	36.2521	22.1931	22.2902		7.78219	7.2242	0.706345	1.8386	3.01328		8.95335	3.47081	8.74463	7.04199	5.88182	5.85987	11.3009	10.2813
4.5		18.5976	19.6422	29.3319	18.4102	39.9993	24.2523	27.2464		3.69101	7.20699	0.294563	3.05354	3.75063		6.38935	3.2717	8.71049	8.90122	6.63584	7.07804	10.9588	10.5624
5		18.4153	22.4513	29.5785	19.5116	38.5607	20.2339	26.8534		6.56766	9.43216	2.58475	2.64694	4.21961		9.19701	3.63609	8.18308	5.79919	6.39816	7.83239	11.5383	10.1809
5.5		20.6616	19.7093	27.2161	21.6828	33.9723	22.0689	24.4006		11.5293	8.23274	1.48591	1.72987	2.08103		11.4681	4.47603	6.93961	7.25175	6.55133	7.10865	10.2586	10.4506
6		20.6968	23.0012	31.0781	22.1339	39.235	14.1303	28.3578		0.405051	9.02028	2.43284	1.46942	2.98395		10.4677	3.85217	6.08018	9.01547	6.80857	6.63501	11.6173	9.51118
6.5		16.614	23.9168	27.4447	19.8056	37.2947	16.347	28.9893		7.49123	9.24372	1.96349	3.00628	3.58822		9.92564	4.89475	5.6582	10.1248	4.67084	7.74341	12.1223	10.8565
7		18.1759	23.5611	30.3754	20.4642	37.5328	21.65	26.5496		8.27677	9.17157	2.92789	3.04033	4.02544		8.95184	2.04753	8.13472	6.71459	6.85266	7.93569	11.9708	11.2814
7.5		18.9438	22.8947	35.9087	21.0227	34.6239	22.3282	25.906		5.8188	10.1534	1.78842	1.7796	5.21641		7.76481	4.63164	3.03189	11.9523	6.74621	7.52338	12.4217	10.7108
8		16.9534	21.2152	33.1732	21.7361	34.3634	18.1109	27.5146		6.99205	9.58803	1.71983	1.15818	4.88174		8.03419	4.60147	6.53093	7.81268	6.59238	7.91648	12.8104	10.2125
8.5		20.6882	24.0434	32.1846	18.5757	35.5291	20.7303	29.9406		7.56158	8.54665	2.49398	2.21904	3.66051		7.23511	3.91813	8.97837	12.9302	5.25725	6.50445	11.6046	9.68504
9		18.0303	20.4494	29.8182	18.3931	39.3583	22.6673	27.3246		11.0319	9.47387	0.637601	2.61222	5.16559		10.1489	5.4987	8.15627	7.40003	5.40062	8.36419	11.8282	11.1119
9.5		21.8876	22.1934	31.0471	19.8025	40.7371	18.4781	25.9943		6.07185	9.4838	1.89471	3.39979	3.91271		9.14028	4.31982	6.3516	11.6092	6.39669	6.75953	12.0949	9.52868
10		20.1739	21.3122	30.7783	18.7752	37.5938	23.7977	28.2007		8.62817	12.4144	2.84879	2.35298	3.44145		9.20378	3.25589	7.90178	10.5146	7.18574	8.70522	11.4922	9.70058
10.5		21.8463	21.3676	27.45	20.8139	37.5005	23.2294	27.7906		11.0019	10.6199	1.48255	2.45565	4.98304		8.66958	5.09606	8.64915	8.10105	7.71921	7.0823	10.0556	10.7058
11		18.8567	25.9325	30.24	19.8785	36.6058	19.5141	29.2638		8.85338	9.98826	1.94441	3.16885	3.25046		10.3602	5.02306	8.25088	9.40454	5.69468	8.08217	10.9393	10.0972
11.5		20.0862	18.6409	31.709	21.9967	39.7889	21.3109	25.8213		4.02909	10.9702	2.88414	4.16816	3.94791		10.193	3.75626	11.193	6.86313	3.56539	7.31191	12.357	10.2132
12		21.3589	21.8057	32.3914	20.8116	38.1048	21.0836	25.6288		10.7003	10.2463	1.41085	4.62548	5.0294		12.5557	3.82685	9.68386	8.25984	6.78318	7.53935	11.4059	11.8525
12.5		23.9323	24.9598	32.6748	23.276	37.8212	24.4457	28.568		5.97502	9.72309	2.17764	3.79457	5.74735		14.8527	4.23688	5.77011	9.39864	6.34635	8.14542	9.37984	10.7112
13		22.0159	21.4304	32.9079	22.7088	41.0491	24.0201	25.0644		5.46384	9.40903	1.7899	3.96839	5.74818		10.8406	4.32937	7.07246	9.30619	6.44382	6.5599	10.4582	10.6867
13.5		23.0162	19.5228	31.0603	24.0382	41.901	19.2919	26.2926		7.64315	12.2553	2.81862	2.15571	5.94055		11.1827	4.25368	10.8895	10.3695	4.7767	8.00562	11.8009	9.434
14		24.1346	21.4239	30.24	23.2667	43.8113	22.316	28.3713		7.82085	9.08044	2.44814	4.02588	5.12721		10.8981	4.7167	8.09953	9.47419	4.40925	8.08351	10.3136	10.681
14.5		17.9749	23.8023	34.0094	20.3142	38.5964	22.5875	24.6986		9.75305	10.3968	1.48172	2.24025	7.15252		10.0561	4.43268	6.57084	9.83769	7.07665	8.45474	11.1461	10.2454
15		19.0379	24.0434	29.5453	18.2636	45.354	23.0064	23.5966		4.763	10.0614	2.54353	3.69887	3.69258		10.1247	4.2738	10.4862	7.65393	3.90329	8.65148	10.6635	10.7929
15.5		21.5639	19.2576	31.711	22.0992	44.5827	24.7095	24.7032		6.29167	9.15633	3.00997	3.86392	4.36631		10.3778	5.40207	9.36911	9.74732	6.92397	8.35915	10.7226	10.3008
16		19.4205	16.1779	31.0229	18.8561	45.359	23.2563	27.5129		10.9011	10.727	2.09507	5.34976	4.52977		10.8975	3.69356	10.8839	10.8544	5.99564	9.38571	11.231	10.2559
16.5		23.1937	21.7167	30.4202	21.6358	38.2872	19.3771	28.7643		3.99361	8.30784	1.2588	4.67769	5.23927		10.5878	5.62433	9.34782	8.35166	6.83132	7.80573	12.5346	10.2524
17		22.1078	24.7784	31.1392	20.0941	42.4444	23.3634	26.7795		8.00981	8.4389	1.25613	4.46359	5.19851		9.96431	4.83263	11.1378	8.97211	7.14884	7.11022	11.4386	10.5811
17.5		23.7167	20.0683	33.0485	21.7575	43.7475	29.3671	26.9277		6.5229	10.5142	-0.34525	5.82625	3.20932		12.6155	4.00331	8.88002	9.37687	4.38526	7.64363	11.8493	10.53
18		22.5456	20.9935	32.4618	19.0712	39.1076	19.1759	27.6368		11.7578	11.2095	2.0817	4.15404	4.4611		10.7118	5.46105	9.84091	5.8917	7.42303	7.66395	11.9632	10.1074
18.5		23.7609	20.7464	33.6467	21.1959	38.0435	24.9835	29.6394		5.86985	10.1576	2.07061	5.10663	5.34752		13.3139	6.43184	7.58721	8.56202	6.40853	7.64245	11.5971	12.0224
19		23.7034	20.8384	32.8223	21.951	40.7558	19.484	25.2158		7.85485	11.5358	3.26477	3.6074	5.39119		12.5433	5.98769	7.77909	7.20078	5.84425	8.39134	10.8498	9.94827
19.5		22.5323	23.6342	32.8952	21.0646	45.6731	22.1114	26.4398		6.45881	9.76248	2.11696	5.28512	5.47998		11.1193	5.78639	9.70171	11.9771	6.48735	8.48233	10.7006	10.9156
20		20.2448	22.8644	33.0661	20.6058	37.5222	22.1796	26.8618		3.16564	10.9454	3.16438	3.95073	4.84786		9.48233	4.80571	5.51626	13.4501	4.64093	9.49107	11.6575	11.177
20.5		19.4283	25.0621	30.523	22.3755	48.7823	22.316	27.2583		4.82162	7.4786	2.28829	3.57218	5.07638		9.58956	5.07783	9.35677	10.3581	7.66274	8.52561	11.2423	11.3848
21		18.5564	20.7269	34.6425	25.787	40.9041	21.285	25.4399		6.96259	6.61917	1.95144	6.14484	6.4382		9.66065	6.678	8.39295	13.3962	4.95752	8.99142	10.3688	10.308
21.5		19.5749	21.596	34.6161	23.4727	39.385	25.8898	26.0175		11.0262	9.53075	1.72775	3.55048	8.3229		11.2597	7.52666	7.39627	12.1313	6.78728	7.76624	12.8876	9.98715
22		23.4949	21.5053	33.4418	24.2191	45.135	25.2876	25.7233		11.2118	10.7318	1.64765	4.67909	6.60063		10.8232	5.31062	9.19343	7.78117	6.75885	7.41665	12.2589	10.577
22.5		20.7382	21.8433	33.278	23.7356	43.5484	25.1925	28.8207		4.67811	10.0748	4.34246	5.1843	6.25371		9.90079	5.33703	8.12483	7.72067	5.54943	9.29977	10.8599	11.2176
23		19.2705	19.8556	32.1702	22.2475	42.5019	26.0506	28.8922		9.92581	9.31173	1.85879	2.9683	5.528		9.51808	5.44919	10.9445	11.5763	6.46222	8.31335	11.0365	10.9345
23.5		20.5094	18.9332	36.5831	22.2222	44.2086	29.8385	21.8339		10.6294	7.81565	4.81024	4.10839	6.48738		10.6323	4.91847	13.3306	8.91725	5.88695	8.22831	11.1756	10.4662
24		20.7282	20.7127	34.5553	23.8031	44.6194	22.5264	27.2938		7.15069	9.7542	2.0452	4.69887	5.62219		9.68928	5.45009	9.75905	10.8966	7.27047	7.65651	12.0486	10.3091
24.5		22.2695	23.5565	34.5287	23.308	43.7884	31.4689	29.6732		8.61415	9.80399	0.614925	5.28447	7.93718		10.8994	6.22055	8.71245	10.2801	6.59041	9.65758	10.723	10.3898
25		23.5959	21.7976	37.6219	22.8008	40.2015	22.4375	23.1009		10.7019	11.98	2.809	4.715	6.14357		7.16479	6.49968	8.45679	6.74569	5.90721	7.41665	11.6461	10.9858
25.5		22.8378	24.9528	33.0485	22.6443	46.1901	18.8139	22.9616		8.79557	11.7476	2.66851	5.75509	5.63495		9.22669	5.32681	7.86467	6.78069	6.73277	7.31121	12.7339	11.269
26		18.5184	25.1482	38.0122	21.1307	38.9723	22.5264	27.2259		8.99105	9.0651	2.91196	5.70695	4.90407		8.24643	5.65978	8.28377	9.32169	7.75374	7.95999	13.0829	11.1
26.5		21.1932	22.3245	36.795	23.7833	43.087	18.7714	26.3667		8.74215	10.118	2.49919	5.40493	6.92307		10.4957	7.87253	8.22759	9.71983	6.81392	8.21746	12.5862	10.5778
27		20.775	21.0291	34.3798	24.118	45.0682	25.9573	26.9077		9.42094	10.2706	2.3251	3.19497	5.84833		8.95301	5.93533	8.68335	9.21161	5.83972	8.72355	11.8402	10.7704
27.5		17.7004	23.5691	34.4691	23.5817	42.4125	23.2198	25.7129		4.74174	11.1479	3.08876	5.87612	5.16816		10.6367	5.66125	8.60921	10.249	5.85069	7.61343	11.2143	10.4957
28		20.5467	27.5267	31.6327	20.166	41.1659	27.8889	30.253		12.1159	10.4325	3.563	5.00506	5.79526		9.99133	6.22107	11.2559	10.7632	7.00564	8.94675	10.0721	10.0485
28.5		21.215	29.2185	32.0827	25.5998	39.1076	28.9409	27.4256		13.2219	12.0392	3.72009	5.52832	6.18299		9.77688	6.67556	9.66408	10.9752	6.95585	8.84419	11.4773	10.3631
29		17.7925	28.2257	29.334	23.8564	42.9473	21.8614	26.5533		1.06443	8.81883	2.09824	3.37958	6.83645		8.90867	6.65513	11.0144	11.2418	7.66629	9.35178	11.0977	10.6206
29.5		21.3203	25.0377	38.1492	23.2618	40.4562	22.4467	24.8175		11.6851	10.7276	2.4254	6.59804	5.43872		11.2473	5.97995	9.40761	9.37704	7.3694	8.99858	11.2279	9.89742
30		21.953	27.4231	34.6787	24.1074	45.3648	31.5345	28.3713		7.52074	8.77851	1.87531	4.37675	5.67051		11.4815	7.43809	9.45851	14.3705	5.78761	8.06557	11.031	10.8466
30.5		21.58	25.2558	32.9864	21.5602	40.9999	21.25	26.4329		9.47639	8.28803	2.26677	6.17681	6.43111		11.0608	6.59881	9.49025	11.4204	5.86574	8.69533	11.0958	10.3517
31		18.6283	22.5509	32.2439	22.0514	44.8961	26.0506	27.8074		11.0765	8.31133	3.05163	6.71206	4.96383		11.842	7.94104	10.9812	10.1107	6.00952	7.43074	11.6223	10.4908
31.5		17.281	27.037	34.4574	23.7028	42.0512	24.2846	26.7579		7.14869	8.35066	3.94078	5.77865	5.74647		10.4401	5.58203	9.39887	8.65353	6.28684	9.25783	11.1362	10.6341
32		23.4156	21.8698	32.4618	22.1544	39.5222	28.3166	30.0979		9.59637	9.47175	2.54087	7.8067	5.98311		11.2261	7.30956	7.62549	11.412	6.67512	8.33356	10.3591	11.693
32.5		19.9215	28.8579	35.7622	20.4145	42.4058	23.9228	27.2682		6.23022	7.87199	4.59253	5.25024	6.09755		11.7749	5.05952	10.0925	9.61441	6.42736	8.12413	11.753	10.5476
33		19.3835	26.1953	31.419	22.4729	39.2393	24.4082	28.8087		8.70115	8.23234	3.23591	6.76954	6.93737		13.3063	5.93718	8.50699	11.1478	9.27184	8.75557	11.4004	10.9598
33.5		22.7687	23.6981	36.1609	22.2795	41.5329	21.1815	26.028		5.62915	12.6794	2.48568	7.55483	6.99305		14.2391	6.32031	8.44249	12.4678	5.76353	9.00763	11.6863	10.6206
34		21.8128	28.2565	35.3958	22.6771	38.3697	27.2585	24.7129		11.4753	11.8408	4.49367	6.44709	6.74646		10.1703	5.77926	9.13829	13.9541	4.7158	7.39769	9.93591	10.9809
34.5		21.0639	27.6863	31.8043	20.7154	40.7485	18.935	28.7391		8.05235	9.64668	2.24322	3.89154	5.80069		12.3742	7.33523	12.7729	12.5966	5.38296	8.50436	11.6695	10.4433
35		23.5959	25.216	37.1723	24.1571	40.6277	26.3774	23.7446		8.77067	9.53364	2.09551	5.81702	6.45311		11.9723	6.48504	11.0899	8.97927	6.4303	8.25253	10.8157	11.1436
35.5		21.9816	23.0858	34.9152	22.2603	41.3423	22.354	25.7233		5.93287	11.0448	3.26125	6.70728	6.42833		11.8292	8.05608	12.0786	10.5473	5.83725	8.65011	10.6507	10.9437
36		22.7916	24.846	34.3576	25.5998	36.1202	20.1035	26.1016		5.16421	7.16183	4.9714	3.31578	7.52886		12.6623	6.34083	12.2942	11.7685	7.2971	9.10842	10.8293	11.3737
36.5		21.5328	25.8581	33.9907	21.9124	43.8005	28.7106	27.5727		6.44695	10.3832	2.26935	4.61312	5.96045		12.0124	7.62513	10.7489	9.41109	6.59345	8.64095	9.64475	10.0288
37		19.9573	24.5218	35.6937	19.5006	40.1565	24.5195	29.0313		6.11966	12.1553	3.1214	5.15891	5.99096		13.4771	5.29818	10.2528	13.6886	8.24096	8.40422	10.3864	10.7619
37.5		21.3457	26.6606	35.0247	26.8539	37.2316	30.735	27.9229		4.90991	9.90531	3.83523	4.53899	6.81556		11.8406	6.31857	11.5676	12.9712	6.75748	9.24306	11.1305	11.5289
38		21.3787	21.9211	35.9711	24.3971	42.3086	21.5736	27.4869		8.15867	9.85974	2.48568	4.85244	4.50762		11.9521	6.16837	9.5065	11.3011	7.97548	8.26618	10.4794	11.12
38.5		20.4196	27.2784	37.8244	24.4165	39.6785	31.1451	26.2914		11.8977	11.2111	2.82004	3.72356	6.80458		13.234	7.03185	9.85728	9.99436	8.3136	7.67727	11.3188	10.8707
39		23.3687	24.7843	34.5175	22.4875	39.1076	21.875	27.2464		7.68958	10.2703	2.47118	5.92216	5.93336		12.6546	7.22482	10.5709	9.23618	7.97392	8.41068	10.0591	11.0477
39.5		20.6655	28.0413	32.3163	24.8644	35.1231	32.6326	24.4624		7.64264	8.90133	2.31087	5.88187	7.61382		9.57014	7.28968	9.02932	10.4467	8.12598	8.09686	11.0247	10.9906
40		21.2565	27.4753	34.6922	21.1236	43.2242	30.0721	24.8838		9.83652	9.84232	1.17332	3.4061	6.8787		9.88925	6.76143	10.6844	12.9933	7.92967	7.20823	12.2225	10.7818
40.5		21.4579	24.4686	35.8051	24.3586	42.2785	24.9513	27.4942		5.25953	9.30169	2.17126	4.53872	8.97732		10.6458	6.29498	11.3287	8.12762	7.56869	9.42441	11.5022	9.94105
41		22.2446	27.6724	35.7226	21.9566	44.6157	25.6511	27.115		4.763	10.6699	2.75075	2.69402	6.25108		12.434	6.90329	8.7431	12.7883	6.15595	7.71439	11.5258	11.472
41.5		19.4085	26.2448	36.918	24.3351	43.1334	25.7806	29.1766		9.8804	9.39007	2.83559	4.49672	6.81316		11.8208	5.60966	11.2577	9.21605	6.82008	8.81233	12.3662	11.2267
42		16.9738	26.1791	33.6039	21.9235	44.6538	28.5552	24.8181		3.38834	10.0239	2.01299	3.29545	5.59094		12.8874	6.50685	9.22918	12.1533	7.61049	9.94637	11.138	10.7708
42.5		22.6556	25.152	34.4458	25.1472	40.1896	29.0281	30.8436		13.9131	9.13842	2.24462	4.14787	6.76086		15.1981	7.07656	10.42	12.5081	5.34858	8.59674	11.5079	10.9679
43		19.8156	25.7891	35.8875	25.3475	42.6889	26.9441	27.8901		10.1089	10.9559	3.37216	4.45809	7.88086		13.6723	6.8868	9.86294	10.7341	6.04884	8.92991	10.2645	10.5058
43.5		20.9681	27.4037	36.5687	25.0874	46.8737	23.5381	23.7735		10.9081	10.6751	2.00351	2.97605	6.47267		11.6775	5.47493	9.47158	15.5316	5.50798	7.73505	11.4402	9.93805
44		21.3004	23.4464	34.7187	22.4443	37.9225	23.4167	26.9895		9.93039	14.0455	3.76803	6.64085	7.22005		15.411	6.07231	10.2068	9.56971	5.10248	8.6826	10.1568	9.94329
44.5		20.1714	24.652	31.5697	25.6413	40.8457	30.5076	27.1032		6.10765	10.5801	0.900726	5.27262	7.13053		13.2666	5.85895	10.6206	10.0846	6.74061	8.12608	12.3051	10.9295
45		17.257	29.7147	34.624	26.1287	39.3973	28.4373	28.242		3.33889	10.4221	1.20885	4.29826	6.74533		13.6505	6.32929	11.768	9.05312	6.2122	8.55573	11.6744	10.3054
45.5		19.9151	29.0293	34.2567	22.3973	46.3498	27.2678	29.5492		8.30968	11.0323	0.493475	3.7677	8.25019		9.85075	6.16186	10.0777	8.23619	7.05984	9.03687	11.7429	10.9753
46		22.2139	27.529	33.9546	26.5451	38.9674	32.3899	26.366		5.97502	7.80074	3.18644	2.84232	8.39406		12.4513	7.10129	13.3888	12.728	6.27822	7.49218	11.0167	10.9468
46.5		20.5153	26.0435	33.1471	26.0603	40.0818	22.3666	26.1125		10.3686	9.6582	1.74931	3.99461	7.27918		13.9487	5.33752	9.26201	12.2709	7.00794	8.89406	12.037	11.075
47		20.9999	26.6205	34.6644	26.7485	45.1242	30.386	30.3702		10.7248	9.82793	1.82254	3.73573	6.44291		12.7787	7.58326	9.61957	12.6379	8.52136	8.15895	11.449	10.7655
47.5		19.2431	26.0435	34.3024	24.8486	39.3995	38.3122	29.6953		11.3581	8.21287	2.50184	2.38987	5.66852		11.6181	8.06924	12.026	9.89065	6.53267	8.21186	11.3512	10.6654
48		19.7729	27.9113	35.1541	25.6653	43.7772	29.1754	24.7395		11.0375	8.34103	2.05497	4.11299	8.69969		11.8929	5.67024	9.91444	8.72993	6.69473	7.4532	11.3279	10.6584
48.5		19.0346	22.1836	35.9288	25.9918	43.3614	28.9409	26.5425		5.38921	10.7564	1.80555	5.34497	6.66282		11.3902	7.59971	11.0835	10.1751	7.93772	8.45155	11.993	10.1674
49		20.6738	26.3061	36.9406	26.7053	38.7099	29.9503	29.1717		11.0075	11.2405	3.59009	3.43248	8.08642		11.0294	7.82309	10.6417	12.8332	8.7577	7.67796	10.3093	10.7234
49.5		19.8715	24.7941	33.37	25.0874	43.1935	28.5313	26.3286		4.27733	11.3166	3.85787	4.1649	6.46833		10.4649	7.96394	12.5989	9.48148	7.61655	9.09571	11.0393	11.1965
50		21.0829	25.6002	35.3561	25.7194	46.2847	31.7103	32.6605		8.72225	11.7046	3.28151	4.93274	6.76375		11.4167	6.49994	10.2215	9.76929	8.72095	7.78761	11.1863	10.4552
50.5		22.7645	27.0263	33.816	25.1833	42.5539	33.0647	29.6983		5.99464	9.41431	1.44216	4.47664	9.1089		10.8079	7.15365	9.25207	11.6014	5.68183	7.94514	11.0747	10.425
51		20.3293	25.7834	34.8126	22.2468	42.5869	29.3579	28.9361		12.0364	6.43105	3.21457	2.52013	5.39229		12.2778	6.63346	14.1743	11.9857	7.52586	9.75977	10.6056	10.4649
51.5		21.0548	26.864	34.7459	28.0564	40.233	26.7367	28.2639		4.41863	10.448	2.16822	3.2007	5.59532		12.6645	6.38455	10.3898	12.3232	8.75837	8.30795	12.5592	11.0484
52		21.6312	26.1691	35.8095	27.0556	41.2722	27.4026	28.4008		12.0434	9.13648	3.22777	4.32225	8.20469		12.7832	5.92013	11.1898	8.13796	7.92778	9.01644	10.9078	10.7811
52.5		21.464	26.4719	35.2343	27.6494	43.1532	26.7107	31.2252		7.78219	11.2482	1.4862	4.11718	7.01348		13.9802	5.99165	11.9525	7.92681	7.12725	7.93554	12.1548	11.0617
53		19.8974	28.7561	38.5984	30.1651	44.3694	29.4986	28.8422		4.57923	11.0773	1.76341	2.13049	5.63886		13.2728	5.38349	8.48438	10.8188	7.16252	8.30675	10.6553	10.8969
53.5		20.5545	22.4531	34.5724	26.6968	39.964	36.0109	27.9835		11.3304	10.9957	2.05704	4.75563	8.34763		12.7521	6.00811	12.4968	13.6728	7.98153	8.12137	11.789	11.0105
54		21.1936	24.9635	39.144	28.1669	45.5765	39.5637	28.7037		3.10362	9.81601	1.49147	2.77749	7.81623		15.3999	7.36299	13.0169	7.15862	8.31962	7.70845	11.7831	10.6538
54.5		22.3837	28.545	31.0268	25.0145	43.5182	31.7103	28.1514		9.20978	10.0671	3.49144	4.89193	7.1834		14.8221	6.52233	7.74622	7.56144	8.16162	6.78613	11.2629	11.2801
55		23.5067	28.2204	34.5979	24.3971	37.3026	21.4465	30.2476		5.97502	9.54602	2.39267	4.43257	6.77278		14.5655	6.04991	11.7683	9.11624	8.64358	8.53583	13.9465	10.6214
55.5		18.6324	25.8581	32.3093	21.2063	44.8631	26.416	27.5129		13.3847	12.6073	2.67511	4.84921	5.47889		16.6768	7.20171	11.0719	13.3488	5.90429	8.07013	12.3826	10.9331
56		22.7206	22.4536	32.6094	21.8273	43.6092	26.7367	28.1187		8.42168	12.0209	2.3993	4.38689	7.13647		15.2224	6.84666	10.8567	11.0721	6.19012	9.03284	10.6174	10.6374
56.5		22.1838	23.8503	27.8899	25.1119	39.6663	31.7103	29.3717		7.19204	10.4813	2.49258	5.56934	6.90407		12.0854	6.04099	11.6557	9.93413	7.47431	7.74306	10.7713	10.8029
57		22.4619	30.6143	31.3198	24.5135	39.9832	31.1989	32.7383		5.38921	11.3371	3.13031	3.53091	10.6086		13.3573	7.95639	11.6791	12.505	6.95585	7.55486	10.0268	10.3241
57.5		20.1788	27.6006	32.6862	24.7946	43.2977	23.9205	27.7557		10.5153	10.9231	3.01163	4.42316	6.68736		14.5916	7.65226	11.2658	8.1337	9.27112	8.48113	9.35952	10.2615
58		22.1078	24.5561	31.2677	23.2524	47.8927	31.5682	27.2172		9.6419	9.57101	3.0987	4.47153	5.98697		15.4874	8.10224	15.2532	9.46158	6.78051	8.21876	10.966	11.3634
58.5		21.6484	23.1784	34.7178	24.4352	40.6385	29.473	31.1537		4.89817	12.1679	1.43468	4.58446	6.69051		12.6847	9.42095	11.6839	9.43405	7.67739	8.02599	9.65429	11.0654
59		21.1285	24.4019	31.8659	23.2524	44.5429	32.8326	32.4941		10.4812	10.5192	1.21464	3.68926	8.43613		11.6725	9.70525	12.3149	7.88131	9.79516	8.74906	10.8951	10.4125
59.5		22.3307	23.8708	32.3111	24.8623	42.9925	37.4295	32.7914		10.6464	11.3802	2.37765	2.9376	7.71841		13.4749	7.38961	12.8325	11.0357	9.19337	8.93253	9.80534	10.5855
60		22.6332	30.4383	35.3958	23.4727	41.8495	27.1762	29.9132		3.63179	7.6876	2.90592	4.04397	8.00311		11.7519	6.9248	14.3706	11.4156	7.43384	8.69093	11.8087	10.5904
60.5		21.5966	29.0028	34.1785	21.7824	42.7917	29.9258	31.4909		4.88043	10.1428	0.67673	3.81082	7.76101		10.3589	6.00627	13.7146	9.03522	6.01191	9.18587	9.37179	10.6451
61		23.7476	25.2637	35.4022	24.5646	40.8915	35.3338	28.5964		7.43696	7.87781	0.844665	4.87016	7.05889		12.7907	5.6087	13.9811	11.2055	8.7577	7.6972	10.6611	10.3636
61.5		20.8031	24.2078	38.1601	25.1167	44.196	34.2095	31.3428		-0.19454	10.134	2.09665	4.51899	7.97329		14.2929	9.06867	9.61957	9.89646	5.61285	8.04628	9.56143	10.1706
62		21.0829	31.8886	34.2142	22.7627	43.7332	28.045	29.8254		5.04394	11.7052	2.89923	4.11608	7.09166		13.1767	6.16311	12.1104	9.69423	5.6816	8.43383	10.9982	11.4253
62.5		21.4938	26.4965	35.7226	28.0103	41.1235	35.9986	30.9075		10.7559	13.4728	0.834337	3.39819	8.39087		14.4379	9.07097	10.1992	9.61099	7.13512	8.68072	10.3036	10.6873
63		18.6367	27.1659	36.2	25.8045	42.7613	32.982	31.0193		12.7867	7.62495	1.79579	4.83516	7.69841		13.7341	8.47761	12.5205	10.4858	7.97392	8.82526	12.4916	11.2787
63.5		22.3213	25.6236	35.5618	25.8198	44.9264	31.8017	27.5344		9.92581	6.69554	3.38625	3.7634	7.99988		8.90489	7.92579	9.68267	14.5924	4.64235	7.57369	10.5751	10.0505
64		22.119	26.8442	33.7693	26.198	41.2102	30.4839	29.8254		7.88325	10.406	1.02134	3.88984	8.78094		11.4305	6.65941	15.2396	12.4378	7.05243	8.69649	10.8482	11.0251
64.5		19.0598	26.5175	37.3443	22.405	39.1076	34.1522	30.7372		11.2935	12.1384	3.35822	5.27184	9.09627		10.5368	7.99026	9.86551	12.9646	8.89764	8.68522	9.41155	11.188
65		20.9195	28.3981	35.6404	24.0607	40.275	27.9885	31.3178		10.7396	10.2036	3.61637	5.00126	9.9111		12.7727	8.01484	8.17812	11.5378	7.77586	8.89011	11.3989	10.1446
65.5		21.6815	28.3705	38.2089	26.4119	37.837	32.3325	30.3542		6.9591	10.1366	0.725381	3.47159	8.67267		12.1732	6.26856	10.3508	13.9268	7.41953	8.53256	10.0786	11.03
66		23.7609	27.2227	32.8464	25.0601	43.6092	34.4797	29.8844		7.46765	10.1037	0.999573	3.50857	7.73772		11.6633	7.86395	9.57973	11.6684	8.77151	9.58629	10.8224	11.0448
66.5		21.3386	27.8043	32.5391	23.8892	42.739	38.3728	28.6315		13.578	13.3545	2.02459	4.07463	6.25198		12.3354	8.1992	10.1545	12.2839	10.4337	9.10388	9.36445	11.1142
67		20.294	24.9265	29.9	23.5225	47.9206	28.9872	31.0779		9.55111	9.17568	1.36962	3.68926	8.58118		14.4829	6.87054	8.93633	13.137	8.32506	9.1285	10.8115	11.0303
67.5		21.2162	25.3388	36.5523	25.1833	45.033	26.8455	29.3051		9.90971	8.29487	2.24537	2.98069	8.50938		15.0105	9.21856	10.4186	14.4087	8.69486	8.45993	8.30132	10.218
68		22.3487	29.6891	33.7535	28.0293	38.2636	32.3373	26.0733		7.52776	8.43591	2.30729	4.47266	7.85623		10.9286	8.39613	8.87808	12.9483	7.91149	7.06284	9.55936	11.3419
68.5		21.1285	25.9957	34.5979	23.3546	41.9622	36.0404	27.9615		9.13021	9.58178	1.77856	5.15397	7.6317		12.716	7.58582	8.80013	9.06185	7.40032	7.85925	10.1678	9.92303
69		22.9356	26.6193	29.4003	25.6913	37.2176	35.4473	32.3727		7.95307	7.79346	4.23368	2.66268	7.34722		11.5691	7.05507	8.28162	7.57718	6.88977	8.57246	10.7658	11.1312
69.5		23.5584	25.8852	36.5348	25.7232	43.3614	38.5404	28.8671		6.98286	12.7373	1.80442	3.56568	6.42769		12.2554	10.3631	7.89322	9.141	8.56295	7.55033	10.4313	10.8414
70		22.1892	28.0084	32.6176	25.7902	45.5539	34.4035	33.0686		8.30273	9.68177	2.50056	2.22361	9.45788		11.907	9.75864	9.6606	8.85601	8.47869	7.04189	11.0094	10.6211
70.5		22.5803	29.4634	36.0117	26.548	43.7666	35.3289	29.6804		4.09877	11.3622	2.35725	3.5694	5.9819		10.7477	8.74357	11.0023	7.81852	7.38242	7.43854	10.8174	10.6344
71		23.6135	28.5742	32.7805	25.7376	43.5141	37.7299	32.1784		10.86	10.0712	-0.10719	3.46397	8.19282		16.2844	7.58187	9.21533	10.6667	8.11388	7.45093	10.6269	10.9526
71.5		23.5376	33.7271	38.0376	25.6193	40.0615	39.9905	32.8509		9.53902	11.8754	1.88701	4.87255	7.0517		15.1655	8.19719	11.2527	11.691	6.09695	8.07924	10.2489	10.7431
72		22.3398	26.6708	35.476	27.7958	39.8744	44.1806	33.1795		8.9925	8.24854	1.03936	5.11056	10.0388		13.1693	8.91092	11.1869	10.127	8.92311	8.64263	9.67321	10.5847
72.5		21.0171	27.2623	35.7226	25.6913	40.1104	40.3825	30.4003		9.08944	10.4882	2.44228	3.41768	9.00493		11.3983	7.96048	12.4746	11.1859	8.54379	9.27618	10.3891	10.1532
73		21.5304	22.6805	36.0728	25.5908	39.9456	36.4068	29.8277		4.64313	11.0692	3.137	3.82683	8.20427		11.8988	8.99696	10.5007	14.2667	7.30152	8.59838	10.5798	11.8301
73.5		22.7876	29.8929	33.6178	26.7975	42.0096	35.4029	29.3073		7.417	9.08402	4.24659	3.87696	8.90907		12.6609	6.70706	9.55768	12.2537	8.10134	8.36552	10.4985	10.5257
74		22.938	21.1854	32.5381	30.2697	39.6663	25.9444	32.4393		10.2279	10.0748	2.12775	3.38544	7.94414		11.5163	7.70397	13.2303	10.4913	8.56061	8.35221	10.3729	11.7026
74.5		23.0452	27.4943	34.5504	26.5639	42.2025	34.1176	31.6682		13.1465	10.0841	3.08347	4.8791	7.91881		11.6261	9.72486	12.4307	12.8255	6.89565	8.1044	10.0847	11.2914
75		24.1842	26.6505	35.9087	25.7742	41.4424	41.3744	32.7323		6.22788	9.21576	2.80082	4.72217	8.86399		14.2792	7.78681	7.94167	11.2628	7.05536	9.63502	9.85143	10.3257
75.5		20.3305	25.9734	36.918	28.6815	47.8631	26.594	33.7934		9.42094	10.1213	1.00249	4.67968	8.58895		13.3659	8.40895	11.3739	11.9781	7.21041	8.61647	11.3112	11.2365
76		24.2312	25.625	36.918	26.2516	43.2019	39.2977	31.2662		7.20944	10.4976	2.7936	4.76563	8.73267		11.8448	10.0764	10.2347	13.633	7.48644	7.86322	10.435	10.6049
76.5		23.7476	31.4306	34.7187	29.0638	42.0929	37.0747	28.0229		10.2504	11.0561	3.04257	4.13958	8.61729		16.027	9.80135	8.32345	11.7188	11.1649	9.05607	9.61898	12.1504
77		23.2689	31.9718	36.9682	25.8062	45.2825	36.7036	34.4556		9.85136	10.727	4.14881	5.11693	7.05521		14.8804	7.54656	11.278	10.8703	7.87013	7.77541	10.214	10.8897
77.5		20.2993	30.3721	32.542	28.7472	39.6508	35.2405	35.4382		10.5103	10.4338	2.22439	3.77837	6.17497		10.6636	8.21919	9.30375	12.3064	7.91073	8.04935	9.05571	10.9614
78		22.3752	24.8284	39.9082	24.2668	42.4838	35.2645	32.9361		9.55903	8.77851	2.47942	5.78864	9.3113		13.4639	8.54925	8.65632	12.0932	8.42631	8.64513	9.24187	10.8233
78.5		25.3331	29.2136	34.5504	27.1798	42.3548	36.234	31.4452		10.3345	10.4701	1.63566	7.79745	7.01494		12.2497	8.84224	11.4573	13.5738	8.4694	7.713	10.2449	10.6991
79		22.6152	25.0372	29.6163	23.6329	43.3318	39.0465	32.3004		10.7406	8.94668	3.08444	4.33398	7.48789		10.6821	10.0203	11.6156	11.8161	7.95351	8.80269	9.71088	10.611
79.5		24.8528	27.2718	33.1086	24.9859	43.075	35.9454	33.6173		8.63597	9.75389	1.18386	5.71081	10.2647		11.0475	8.84925	9.24997	13.4775	8.30294	9.64252	10.252	11.351
80		23.6889	26.2914	32.7825	31.1218	38.6779	48.648	29.9569		10.2164	11.0309	2.41512	6.56296	6.59404		13.3572	10.7911	7.57736	13.4495	9.6301	9.76813	9.30982	11.1738
80.5		20.5545	24.3463	33.2534	25.921		41.7906	34.7172		8.10523	9.67	2.96478	6.24296	7.10052		11.7281	9.06799	8.03768	11.9983	9.92816	8.68313	9.61067	10.8005
81		23.46	25.3635	31.9995	21.1406		46.5257	31.852		12.4361	11.0566	3.94929	2.98069	8.13289		12.0961	10.7276	8.95943	11.9922	9.36295	7.93845	8.01147	10.4988
81.5		23.871	23.7061	35.3234	24.584		44.7847	34.4822		7.05141	11.7105	2.48257	4.40695	6.21942		7.80217	9.8625	10.4116	12.6739	10.2041	9.31621	9.53602	11.4443
82		20.9428	28.6051	37.7888	27.5421			32.5575		7.6832	11.9868	2.60524	1.75035	7.04704		9.0271	9.31791	7.62104	9.63304	6.33956	9.06098	7.89662	12.0677
82.5		22.8163	26.9743	33.0734	19.9497			31.2629		8.69926	8.45592	2.05037	4.03134	8.36789		10.891	9.60545	11.8955	12.6984	8.36312	8.36939	8.82074	10.9888
83		24.9565	25.837	32.3025	23.9562			35.0211		8.84383	9.58552	2.98736	1.7442	8.42819		14.1109	11.7751	8.89906	14.8769	9.26416	8.50591	11.2223	10.8102
83.5		23.5911	28.3705	36.9406	23.2339			34.679		11.6861	11.7376	3.01087	2.45565	7.58286		11.451	10.3246	12.4035	11.8562	8.32859	8.88909	10.2494	10.231
84		22.0459	30.6307	33.7458	25.1624			35.4362		8.8616	11.8722	2.1153	3.11981	6.73681		10.7276	10.7408	10.9846	9.77563	8.51198	7.718	9.39368	11.0025
84.5		21.8065	25.6946	32.0685	25.5752			35.44		12.7218	12.747	2.84042	5.60405	7.84191		11.1509	9.73767	12.0749	10.5825	9.76946	8.10667	8.97063	10.7101
85		21.8717	22.7945	34.8557				33.6606		6.49713	10.0348	2.00322	4.88422	7.20947		11.442	8.38484	10.8095	12.7383	7.32478	8.35525	9.49141	11.2756
85.5		20.7106	26.5682	33.3755				34.2894		10.9667	10.0038	2.06767	5.58182	7.019		9.85418	8.74863	10.1184	12.7556	7.8595	9.26811	9.07542	9.76681
86		22.096	23.9317	33.5586				34.2392		5.44514	8.94586	1.18971	5.97653	7.47739		9.94936	8.36461	10.302	11.317	10.2374	9.79079	8.83541	11.1756
86.5		22.5111	23.5599	34.9157				34.3477		14.2123	6.21125	2.72301	3.29035	7.04347		13.5098	7.19358	11.8646	11.679	8.79032	7.17989	9.61607	9.80918
87		25.351	22.6199	36.0614				31.2369		8.27677	9.9279	1.19911	5.1698	7.73729		9.91451	9.86273	10.4561	13.1541	7.95369	8.34241	10.6099	11.3062
87.5		22.0159	26.1094	34.1202				32.6522		14.7043	10.6928	1.87691	5.41505	7.97703		10.5832	9.9054	10.4865	13.2726	10.3457	8.23765	9.7687	10.4017
88		21.8924	27.4758	41.0581				34.9858		10.654	10.778	2.70405	5.09903	7.96966		12.9906	8.58896	9.2622	14.0403	8.99837	8.6664	10.506	10.2859
88.5		21.7463	26.5706	34.0722				33.8558		10.7322	12.3109	0.839499	4.8142	7.38301		12.7438	8.90399	11.6126	13.6707	10.6449	7.99592	8.55636	10.4955
89			27.8383	32.9214				31.3286		4.67759	8.15973	2.95792	4.72445	7.00217		16.1498	8.94999	11.2898	11.0421	9.04348	9.54932	9.4381	10.6301
89.5			27.2227	35.1536				34.8688		13.7467	10.0784	0.816864	5.72472	7.13136		12.0613	12.4461	10.6993	11.3826	7.88003	8.76049	9.72064	11.3786
90			24.4833	37.5224				32.3433		8.45262	11.2521	1.54687	5.18515	6.36135		12.9506	9.47341	11.0488	10.2443	11.3767	9.00958	9.90916	11.4134
90.5			26.5089	32.6973				35.3436		11.975	11.9014	2.01204	6.66654	5.55791		9.09457	10.3506	8.04692	7.64129	7.64248	8.74809	8.6756	10.5476
91			26.5005	41.1304				35.4899		6.54654	11.6925	4.1139	4.31661	9.48655		9.38375	9.15743	12.2568	11.8299	9.72219	8.29023	9.77968	10.1458
91.5			25.0117	38.5696				34.8474		9.38709	11.4881	2.48817	5.92251	8.95313		10.9572	8.18641	9.87366	9.72417	8.17534	7.85664	10.0413	10.56
92			28.8844	35.4673				31.6518		5.51855	10.9281	2.41617	8.15473	8.58972		11.3235	9.50254	11.1255	14.0097	8.66836	9.61371	8.47998	9.94156
92.5			25.1821	34.5813				32.7812		6.18875	10.2715	0.565991	7.41289	6.47423		9.84946	9.6629	11.8608	12.9876	7.703	8.15289	10.273	11.6
93			31.1495	35.1701				32.4036		10.2981	10.8268	2.66962	6.25485	10.037		9.48377	10.5326	11.9507	12.0774	7.10074	8.88715	9.37918	11.4057
93.5			26.3189	35.0247				31.8383		8.70115	10.486	2.08779	6.15575	8.92252		10.0125	11.6771	10.8916	8.50398	10.4461	8.36912	8.83604	11.4238
94										3.57225	13.5476	3.86113	5.8044	7.47929		10.5393	8.36112	12.4035	9.60923	7.91206	9.62033	7.17761	11.4614
										7.30924	11.1909					10.5794					8.51338	8.87791	10.4545
										10.0757											9.68896	7.95493	10.5543
										9.25226											10.1484	9.73911	11.6348
																					8.74114		11.4199

## Sheet: Figure 3F 
unc 44::gfp immoblie fraction
	ALM	Amphid	VNC
	74.6806	90.8283	88.8095
	92.9533	89.314	90.3378
	80.4376	97.6703	89.475
	88.6879	94.9844	88.2339
	85.4146	92.4185	91.1197
	86.7243		91.3479
	93.7376		90.6644
			89.1598

## Sheet: Figure 3G 
		wild type						unc-119(de3)									unc-33(mn407)
time(s）		w1	w2	w3	w4	w5		w1	w2	w3	w4	w5	w6				w1	w2	w3	w4	w5	w6
0		0	0	0	0	0		0	0	0	0	0	0				0	0	0	0	0	0
0.5		0.816067	1.6741	0.399046	1.33254	-0.11517		3.10765	2.75585	4.64232	5.26975	-0.56595	0.699033				1.40595	3.17657	1.2921	1.31001	1.86969	4.99289
1		1.63213	3.3482	0.798091	2.66508	-0.23033		3.26677	3.49753	5.4012	8.18739	2.93118	1.29662				2.81191	6.35314	2.5842	2.62001	3.73938	9.98578
1.5		2.92487	5.83964	1.12851	2.45952	0.308601		3.52358	4.59469	10.8605	5.75795	5.76924	5.11182				2.20255	7.20638	4.39813	3.00705	3.95153	11.7535
2		4.2176	8.33108	1.45893	2.25396	0.847531		2.15096	3.80219	9.97433	9.03208	4.31504	3.41382				1.5932	8.05961	6.21205	3.39408	4.16368	13.5212
2.5		5.41584	7.65493	1.53418	1.39471	1.37654		4.33914	4.29619	10.8336	10.8471	7.50976	4.43024				1.76951	8.58733	5.81682	3.53895	4.86954	14.7139
3		6.61408	6.97878	1.60943	0.53546	1.90555		4.01969	3.91692	14.5849	8.8805	8.14766	4.88265				1.94582	9.11506	5.42159	3.68382	5.5754	15.9067
3.5		8.2269	7.38001	1.21416	1.06017	2.30597		6.4356	4.50305	7.87197	11.2978	10.0846	2.24841				2.5919	8.99139	5.70789	3.87112	5.66647	15.0567
4		9.83972	7.78125	0.818881	1.58488	2.70639		2.55713	4.17337	10.6557	9.54218	8.77071	6.38579				3.23798	8.86772	5.99418	4.05841	5.75754	14.2068
4.5		10.1294	7.21792	1.54808	3.04572	2.53247		3.85586	4.07079	7.98382	13.1312	14.9344	7.28591				3.62591	7.86318	6.51524	4.38939	6.42733	14.5969
5		10.4191	6.65459	2.27727	4.50655	2.35855		3.91188	4.42257	10.8643	9.89366	13.2861	9.9175				4.01384	6.85865	7.0363	4.72037	7.09712	14.987
5.5		7.8642	6.14771	2.0462	3.53219	3.10174		6.03235	5.02789	9.8027	11.6234	16.4579	9.13577				3.84174	7.98262	7.70534	4.72428	7.12639	14.7099
6		5.30933	5.64083	1.81514	2.55782	3.84492		4.34501	4.03942	8.48258	13.2013	12.768	5.275				3.66965	9.10659	8.37438	4.72818	7.15566	14.4328
6.5		6.58236	6.28122	2.15714	2.886	2.79825		6.28348	5.28446	13.2895	9.29855	15.4086	11.0066				3.99628	9.54986	9.26096	5.05944	6.74572	16.923
7		7.85539	6.92161	2.49914	3.21418	1.75158		4.43679	5.56974	5.68751	10.7454	19.7478	12.4516				4.32291	9.99313	10.1475	5.3907	6.33578	19.4132
7.5		7.81879	7.0729	1.60274	2.52639	2.38243		3.40634	4.61079	8.20957	12.8158	11.2105	6.36372				3.89217	9.75175	9.67312	5.52687	6.15644	19.2294
8		7.78219	7.2242	0.706345	1.8386	3.01328		5.70392	4.73139	4.21523	9.6837	14.2143	8.9981				3.46143	9.51038	9.1987	5.66304	5.97711	19.0456
8.5		5.7366	7.2156	0.500454	2.44607	3.38195		5.02025	5.39382	7.91062	13.5509	20.2898	10.7107				3.68508	10.5036	9.45084	5.39359	5.98877	17.9851
9		3.69101	7.20699	0.294563	3.05354	3.75063		5.63694	4.71785	8.20469	13.8524	15.8797	11.5006				3.90874	11.4968	9.70298	5.12415	6.00042	16.9246
9.5		5.12934	8.31958	1.43966	2.85024	3.98512		3.6227	5.61824	8.23305	14.372	9.70621	12.6454				5.16919	13.2222	9.83883	5.2512	6.45766	15.5425
10		6.56766	9.43216	2.58475	2.64694	4.21961		3.05184	4.75457	9.99277	11.328	14.3751	10.9985				6.42964	14.9477	9.97469	5.37825	6.9149	14.1604
10.5		9.0485	8.83245	2.03533	2.18841	3.15033		4.28215	5.27975	8.18064	15.4807	16.156	9.77917				5.70186	11.7783	8.48224	5.32129	6.90693	16.9001
11		11.5293	8.23274	1.48591	1.72987	2.08103		4.47039	5.22602	6.51826	10.9823	12.3036	15.2716				4.97408	8.60888	6.98979	5.26432	6.89897	19.6399
11.5		5.9672	8.62651	1.95937	1.59965	2.53249		5.3228	4.2315	11.8822	14.1341	13.9789	16.7975				5.37567	11.0866	8.2294	5.78694	7.15232	17.4723
12		0.405051	9.02028	2.43284	1.46942	2.98395		3.25556	5.27686	6.43601	9.71675	14.628	11.9689				5.77726	13.5643	9.46902	6.30956	7.40567	15.3047
12.5		3.94814	9.132	2.19817	2.23785	3.28609		5.03538	4.84092	7.70261	12.3694	12.2131	11.9059				5.21227	12.5179	9.37114	6.02274	8.66548	17.6848
13		7.49123	9.24372	1.96349	3.00628	3.58822		4.23215	4.95402	7.96887	13.9413	15.5641	11.9184				4.64726	11.4715	9.27325	5.73591	9.92529	20.0649
13.5		7.884	9.20764	2.44569	3.02331	3.80683		5.3214	5.24652	7.09346	12.8055	17.0473	11.5963				4.61363	10.9485	9.9289	6.03128	8.67363	19.551
14		8.27677	9.17157	2.92789	3.04033	4.02544		6.1418	5.17618	8.43614	11.9327	15.452	13.4359				4.58	10.4254	10.5846	6.32665	7.42197	19.0371
14.5		7.04779	9.66249	2.35816	2.40996	4.62093		5.23443	5.75988	7.93765	14.0105	13.5256	15.3219				4.70683	10.9689	9.89776	6.64252	7.5946	20.5389
15		5.8188	10.1534	1.78842	1.7796	5.21641		4.95577	5.67686	7.67828	13.3535	12.246	10.8908				4.83366	11.5124	9.21096	6.95839	7.76723	22.0408
15.5		6.40543	9.87072	1.75413	1.46889	5.04908		5.3915	4.43489	9.10136	15.413	19.0014	15.3155				5.58826	10.8622	9.26437	6.49557	7.94566	20.3847
16		6.99205	9.58803	1.71983	1.15818	4.88174		3.39116	6.16411	6.10502	10.6071	11.4851	15.0967				6.34285	10.212	9.31778	6.03276	8.12408	18.7287
16.5		7.27681	9.06734	2.1069	1.68861	4.27112		4.41604	5.20971	4.10052	9.51259	12.8752	15.5835				5.63727	11.6314	10.5091	6.51032	7.21798	19.3523
17		7.56158	8.54665	2.49398	2.21904	3.66051		7.07641	5.64717	6.33198	11.7167	19.0244	11.6638				4.93168	13.0508	11.7003	6.98787	6.31188	19.9759
17.5		9.29674	9.01026	1.56579	2.41563	4.41305		6.01812	5.63819	7.5738	13.5383	10.966	14.2284				4.43178	11.5984	11.3728	6.53976	6.38221	20.126
18		11.0319	9.47387	0.637601	2.61222	5.16559		5.62354	5.82307	8.79136	14.2922	9.96514	11.1496				3.93188	10.1459	11.0453	6.09164	6.45254	20.2761
18.5		8.55187	9.47883	1.26615	3.00601	4.53915		6.08109	5.29098	7.82291	15.472	12.6528	12.5311				4.42558	11.3408	11.6725	6.34864	6.25803	21.1582
19		6.07185	9.4838	1.89471	3.39979	3.91271		5.90206	5.60312	7.85689	12.8379	8.7137	10.8177				4.91929	12.5357	12.2996	6.60564	6.06352	22.0404
19.5		7.35001	10.9491	2.37175	2.87639	3.67708		5.34733	5.21097	9.12079	14.0742	11.3064	9.67655				4.71759	12.4165	11.3128	6.95036	6.1044	21.2218
20		8.62817	12.4144	2.84879	2.35298	3.44145		6.39719	6.45064	5.90912	15.798	12.2814	13.8955				4.51589	12.2973	10.3259	7.29508	6.14527	20.4032
20.5		9.81503	11.5172	2.16567	2.40432	4.21224		5.95205	4.87247	6.65224	12.9109	9.75449	11.8284				4.62238	11.4357	10.8807	6.87249	6.47226	20.8718
21		11.0019	10.6199	1.48255	2.45565	4.98304		6.11531	6.33047	5.44541	14.0619	6.09204	9.64568				4.72887	10.5741	11.4355	6.44989	6.79924	21.3403
21.5		9.92763	10.3041	1.71348	2.81225	4.11675		5.208	5.02827	5.98739	14.2417	4.6248	11.227				4.95113	12.5713	11.6596	6.72536	7.89612	21.2683
22		8.85338	9.98826	1.94441	3.16885	3.25046		5.80958	3.94378	6.31312	16.1728	5.55955	12.7178				5.17339	14.5684	11.8837	7.00082	8.99301	21.1963
22.5		6.44123	10.4792	2.41427	3.66851	3.59919		5.5127	6.46691	9.09048	14.3369	9.28188	11.8493				4.95117	15.052	10.3955	6.83102	7.94599	20.6726
23		4.02909	10.9702	2.88414	4.16816	3.94791		4.64733	5.71313	5.38326	14.287	11.4534	29.1815				4.72895	15.5356	8.90738	6.66122	6.89897	20.1489
23.5		7.3647	10.6082	2.1475	4.39682	4.48865		4.45366	5.26934	4.62372	14.9813	5.8335	12.4519				5.0075	14.7449	8.75202	6.52467	7.16754	20.7041
24		10.7003	10.2463	1.41085	4.62548	5.0294		5.90363	6.00747	4.73584	15.2102	1.05781	15.8731				5.28605	13.9542	8.59666	6.38811	7.43612	21.2592
24.5		8.33766	9.98468	1.79425	4.21003	5.38837		7.12852	5.29896	3.10148	11.3979	2.80639	8.63373				5.55302	15.1642	9.72665	6.68608	7.65515	21.269
25		5.97502	9.72309	2.17764	3.79457	5.74735		6.81689	6.18268	6.5958	13.6787	7.20357	13.5421				5.82	16.3742	10.8566	6.98405	7.87419	21.2787
25.5		5.71943	9.56606	1.98377	3.88148	5.74777		6.51568	5.42648	8.98253	12.898	4.97302	12.8053				5.36067	14.9827	11.5377	7.0755	7.6018	20.5165
26		5.46384	9.40903	1.7899	3.96839	5.74818		5.87902	6.6586	6.63891	14.8627	4.84772	14.6143				4.90135	13.5911	12.2187	7.16696	7.32942	19.7544
26.5		6.55349	10.8322	2.30426	3.06205	5.84436		5.95869	5.95402	5.67949	14.3001	4.82379	13.5129				5.33744	14.1797	11.0382	7.25064	6.77498	21.8016
27		7.64315	12.2553	2.81862	2.15571	5.94055		6.89579	5.89989	8.44193	15.6788	10.6746	13.4329				5.77354	14.7683	9.85768	7.33432	6.22055	23.8488
27.5		7.732	10.6679	2.63338	3.09079	5.53388		6.1862	4.8882	2.78045	13.3857	8.27157	10.4443				5.5506	13.7997	11.1591	7.16387	7.32003	21.5403
28		7.82085	9.08044	2.44814	4.02588	5.12721		5.72771	6.21414	7.74454	12.6393	4.84168	10.6596				5.32766	12.831	12.4606	6.99343	8.41952	19.2317
28.5		8.78695	9.7386	1.96493	3.13307	6.13987		4.34321	5.19316	0.882317	15.2718	7.01012	13.1824				5.6482	14.1058	12.2636	7.06496	7.92782	17.9175
29		9.75305	10.3968	1.48172	2.24025	7.15252		6.0204	4.37367	7.67056	14.6431	4.22077	11.4684				5.96875	15.3805	12.0665	7.13648	7.43612	16.6033
29.5		7.25803	10.2291	2.01263	2.96956	5.42255		4.20102	4.60308	5.62391	14.0341	4.13394	14.2683				4.96304	15.9348	11.2051	7.05044	7.38907	17.9418
30		4.763	10.0614	2.54353	3.69887	3.69258		5.09807	4.77972	8.8828	13.261	4.47482	9.2094				3.95733	16.4892	10.3437	6.9644	7.34201	19.2804
30.5		5.52734	9.60888	2.77675	3.7814	4.02945		5.65623	6.39427	6.64199	14.2121	1.67976	14.7042				5.31927	15.5981	10.8946	6.89688	7.92975	20.651
31		6.29167	9.15633	3.00997	3.86392	4.36631		5.90409	5.46361	3.0093	12.0962	5.59913	13.3856				6.6812	14.707	11.4455	6.82936	8.51748	22.0217
31.5		8.5964	9.94164	2.55252	4.60684	4.44804		6.13515	5.41587	2.50906	16.5933	5.29532	16.742				6.40062	13.0395	12.499	6.46965	8.05327	21.075
32		10.9011	10.727	2.09507	5.34976	4.52977		6.41564	5.94243	4.30783	14.4717	6.51677	16.9126				6.12003	11.3721	13.5524	6.10994	7.58906	20.1283
32.5		7.44737	9.5174	1.67694	5.01372	4.88452		7.24645	4.64991	6.98274	12.4831	4.01364	11.3046				6.34757	11.6136	12.9841	6.44775	7.94088	21.0057
33		3.99361	8.30784	1.2588	4.67769	5.23927		6.65765	5.24002	6.09109	14.1562	4.14759	19.2036				6.57512	11.8551	12.4157	6.78555	8.29271	21.883
33.5		6.00171	8.37337	1.25746	4.57064	5.21889		5.58979	6.44958	9.20864	11.5622	4.24477	17.4081				6.45975	12.5161	13.0815	6.62738	8.55849	20.671
34		8.00981	8.4389	1.25613	4.46359	5.19851		6.25584	6.45011	7.26184	13.0389	4.23526	15.7072				6.34437	13.1772	13.7474	6.46921	8.82427	19.459
34.5		7.26635	9.47657	0.45544	5.14492	4.20391		7.10339	7.60274	7.73644	12.99	4.54069	16.8487				5.6499	11.8277	12.8092	6.59009	8.82671	20.2722
35		6.5229	10.5142	-0.34525	5.82625	3.20932		6.68185	3.78321	7.069	12.3665	5.90896	14.3272				4.95542	10.4782	11.8709	6.71098	8.82915	21.0853
35.5		9.14037	10.8619	0.868226	4.99015	3.83521		6.45541	4.18116	4.90318	15.9546	8.4471	15.1506				5.41141	11.9237	11.2823	6.6026	8.44395	20.8872
36		11.7578	11.2095	2.0817	4.15404	4.4611		4.87737	5.02424	6.75295	12.7859	7.40738	13.3256				5.8674	13.3692	10.6938	6.49421	8.05875	20.689
36.5		8.81385	10.6835	2.07615	4.63034	4.90431		6.84828	6.21171	4.49383	14.5412	3.49909	15.8348				5.42612	14.0131	11.5057	6.76851	8.30032	22.529
37		5.86985	10.1576	2.07061	5.10663	5.34752		6.0558	6.15382	7.38143	16.7716	4.78897	17.8522				4.98485	14.657	12.3176	7.0428	8.5419	24.369
37.5		6.86235	10.8467	2.66769	4.35702	5.36936		5.1019	5.83722	3.80871	9.82539	8.41088	18.1114				6.10346	13.7729	12.3984	7.00687	7.77011	23.6237
38		7.85485	11.5358	3.26477	3.6074	5.39119		6.03157	4.66432	5.31208	13.1643	9.3362	18.9212				7.22207	12.8887	12.4793	6.97093	6.99832	22.8783
38.5		7.15683	10.6491	2.69086	4.44626	5.43559		6.08883	4.11202	7.55789	12.021	5.92082	16.3774				6.22692	12.1935	12.6737	7.26629	8.14655	23.3405
39		6.45881	9.76248	2.11696	5.28512	5.47998		4.25967	5.22976	6.2052	14.8813	3.26193	14.0635				5.23176	11.4983	12.8681	7.56165	9.29477	23.8027
39.5		4.81223	10.3539	2.64067	4.61792	5.16392		6.3464	5.80818	5.48781	12.4042	6.91483	11.4303				6.01819	12.1103	12.1943	7.8415	8.67448	22.7271
40		3.16564	10.9454	3.16438	3.95073	4.84786		6.76165	5.83143	6.44728	13.0878	6.41345	15.4581				6.80462	12.7224	11.5205	8.12135	8.05419	21.6515
40.5		3.99363	9.212	2.72633	3.76145	4.96212		4.71958	6.84003	7.50632	15.0827	4.89608	15.7872				5.71042	13.5653	12.1711	7.87353	8.19595	21.3701
41		4.82162	7.4786	2.28829	3.57218	5.07638		6.29744	5.98191	8.03226	14.1484	5.93724	14.927				4.61623	14.4081	12.8218	7.62571	8.33772	21.0888
41.5		5.8921	7.04888	2.11986	4.85851	5.75729		6.53098	5.557	9.27347	13.5369	9.0286	16.8297				5.87265	13.3174	12.5798	7.33088	8.7971	21.4705
42		6.96259	6.61917	1.95144	6.14484	6.4382		6.4345	4.95172	8.86008	12.9416	3.8525	15.4317				7.12906	12.2267	12.3378	7.03606	9.25648	21.8523
42.5		8.99437	8.07496	1.8396	4.84766	7.38055		6.20477	5.19568	6.31816	14.58	2.16255	14.6342				7.08537	13.5931	12.4122	6.8797	8.72572	21.2907
43		11.0262	9.53075	1.72775	3.55048	8.3229		5.95954	6.38509	7.24279	13.5318	1.2305	15.3594				7.04167	14.9595	12.4866	6.72335	8.19497	20.7291
43.5		11.119	10.1313	1.6877	4.11478	7.46177		7.11203	6.48799	6.89893	14.6155	4.93081	16.9594				6.5222	14.2944	13.0016	6.99147	8.37255	21.8387
44		11.2118	10.7318	1.64765	4.67909	6.60063		5.608	6.91756	8.46105	12.8531	2.52259	17.1893				6.00272	13.6293	13.5165	7.25959	8.55013	22.9484
44.5		7.94494	10.4033	2.99505	4.9317	6.42717		5.42387	5.00735	7.92156	14.1713	7.4202	12.6036				5.5464	15.2644	12.6826	7.31234	9.46742	23.1446
45		4.67811	10.0748	4.34246	5.1843	6.25371		6.02229	5.63854	9.64092	13.9673	5.83399	13.1296				5.09007	16.8995	11.8488	7.36509	10.3847	23.3408
45.5		7.30196	9.69329	3.10062	4.0763	5.89086		5.91962	5.9947	6.2822	13.7274	6.35487	15.4734				5.4452	17.872	12.2122	7.35479	9.57033	25.2892
46		9.92581	9.31173	1.85879	2.9683	5.528		6.37642	7.01429	6.70052	18.519	7.56278	14.6221				5.80032	18.8444	12.5757	7.34449	8.75594	27.2375
46.5		10.2776	8.56369	3.33451	3.53835	6.00769		6.15323	4.73884	8.97418	13.8676	6.30106	11.9561				5.91248	17.674	12.3853	7.14342	8.60444	25.9306
47		10.6294	7.81565	4.81024	4.10839	6.48738		7.24125	5.58234	2.67179	13.6168	5.0063	14.2369				6.02463	16.5035	12.195	6.94235	8.45293	24.6237
47.5		8.89003	8.78492	3.42772	4.40363	6.05478		5.91819	6.20183	4.32632	13.9966	3.86826	14.4408				5.42091	14.56	12.7557	6.94419	9.56142	22.6986
48		7.15069	9.7542	2.0452	4.69887	5.62219		5.22597	6.43138	5.70045	13.9167	7.21514	13.8526				4.81718	12.6165	13.3164	6.94603	10.6699	20.7735
48.5		7.88242	9.77909	1.33006	4.99167	6.77968		6.69522	7.04306	7.61974	14.5101	6.24904	17.0074				5.10436	11.6716	12.2488	7.15367	10.093	21.4774
49		8.61415	9.80399	0.614925	5.28447	7.93718		3.73871	6.41097	6.85074	16.1414	8.81596	14.0449				5.39154	10.7267	11.1812	7.3613	9.51604	22.1813
49.5		9.65802	10.892	1.71196	4.99974	7.04038		6.3351	6.82871	4.85738	15.5563	6.77072	12.4367				5.45692	13.0762	12.4543	7.30063	8.72843	21.7981
50		10.7019	11.98	2.809	4.715	6.14357		5.48059	6.33368	8.6609	13.6352	5.02079	14.7594				5.52229	15.4257	13.7273	7.23995	7.94081	21.415
50.5		9.74873	11.8638	2.73875	5.23505	5.88926		6.30106	5.89508	5.25706	15.6667	5.34818	13.6486				6.23954	15.6044	13.3914	7.62341	8.63596	22.212
51		8.79557	11.7476	2.66851	5.75509	5.63495		5.84738	5.62648	6.39526	16.1004	0.513104	14.007				6.95678	15.783	13.0556	8.00688	9.33111	23.0089
51.5		8.89331	10.4063	2.79023	5.73102	5.26951		5.68823	6.0284	6.1106	13.2971	5.22549	15.2325				6.42206	13.6318	12.2301	8.33185	8.88005	23.6507
52		8.99105	9.0651	2.91196	5.70695	4.90407		4.98444	5.88771	2.26282	15.6727	5.94686	11.5339				5.88734	11.4806	11.4045	8.65682	8.42899	24.2925
52.5		8.8666	9.59154	2.70558	5.55594	5.91357		5.91954	6.23496	3.38224	14.0764	5.30313	12.5466				5.77851	12.4006	11.2209	8.21349	9.50334	24.3981
53		8.74215	10.118	2.49919	5.40493	6.92307		6.40724	7.17087	4.70155	13.694	3.03102	14.5254				5.66967	13.3206	11.0372	7.77017	10.5777	24.5037
53.5		9.08155	10.1943	2.41215	4.29995	6.3857		4.94355	6.4017	2.00338	15.7163	3.87184	11.7042				6.00575	13.1087	12.067	8.25559	9.34147	22.8169
54		9.42094	10.2706	2.3251	3.19497	5.84833		5.54088	5.23093		12.9906	-1.84227	12.3316				6.34182	12.8968	13.0968	8.74101	8.10525	21.13
54.5		7.08134	10.7092	2.70693	4.53555	5.50825		7.20797	6.39114		14.5772	3.78911	10.9734				5.82335	12.256	13.2288	8.62115	9.02453	23.2819
55		4.74174	11.1479	3.08876	5.87612	5.16816		6.62199	6.03855		13.8348	2.21329	13.5327				5.30488	11.6152	13.3607	8.50129	9.94381	25.4338
55.5		8.42882	10.7902	3.32588	5.44059	5.48171		6.58931	5.47588		14.6616	7.58772	12.4119				6.02816	13.9967	12.208	8.44379	9.77583	25.2
56		12.1159	10.4325	3.563	5.00506	5.79526		5.82182	4.73072		16.7823	2.80842	10.9049				6.75144	16.3782	11.0553	8.38629	9.60785	24.9661
56.5		12.6689	11.2358	3.64154	5.26669	5.98913		7.55187	5.46911		14.0547	4.80494	13.5416				6.68908	15.5263	11.7643	8.17286	9.51125	23.742
57		13.2219	12.0392	3.72009	5.52832	6.18299		5.72489	6.205		14.9556	9.45426	13.7555				6.62672	14.6744	12.4733	7.95943	9.41464	22.518
57.5		7.14316	10.429	2.90916	4.45395	6.50972		6.03346	5.3475		13.1795	1.9461	13.044				6.22258	13.5671	12.3807	8.26441	10.003	22.8159
58		1.06443	8.81883	2.09824	3.37958	6.83645		5.66603	6.44398		11.2811	5.98761	16.9096				5.81845	12.4598	12.2882	8.56938	10.5913	23.1137
58.5		6.37474	9.77319	2.26182	4.98881	6.13758		5.55349	5.53266		15.6486	8.7203	16.0486				5.81573	13.7088	13.1372	8.32863	10.0642	23.6473
59		11.6851	10.7276	2.4254	6.59804	5.43872		6.2755	5.5227		12.8354	7.12925	13.9466				5.81302	14.9578	13.9862	8.08787	9.53711	24.1808
59.5		9.6029	9.75303	2.15035	5.4874	5.55462		6.25319	5.58228		14.2298	6.82462	11.5447				6.38527	13.7458	13.4633	7.42788	9.40318	22.9439
60		7.52074	8.77851	1.87531	4.37675	5.67051		4.92722	7.03815		11.8788	10.8253	14.8417				6.95752	12.5338	12.9405	6.76788	9.26925	21.7068
60.5		8.49857	8.53327	2.07104	5.27678	6.05081		6.21074	6.08311		12.0643	9.50311	13.2863				6.2031	14.7994	12.9719	7.31179	8.53143	22.1893
61		9.47639	8.28803	2.26677	6.17681	6.43111		6.63261	4.98479		15.2402	11.0639	12.8187				5.44869	17.065	13.0035	7.8557	7.79361	22.6717
61.5		10.2765	8.29968	2.6592	6.44444	5.69747		6.14331	5.72591		15.4091	4.82	16.0401				5.75961	15.1775	12.7301	7.57783	8.44221	23.3365
62		11.0765	8.31133	3.05163	6.71206	4.96383		4.30663	6.40633		16.2258	10.4143	13.6348				6.07052	13.2899	12.4567	7.29996	9.09081	24.0013
62.5		9.1126	8.331	3.4962	6.24535	5.35515		6.2779	4.63322		15.9122	3.85387	13.4265				5.78528	12.2053	12.7068	7.81102	8.44521	23.1161
63		7.14869	8.35066	3.94078	5.77865	5.74647		4.54715	5.85735		16.0959	7.06128	8.85151				5.50003	11.1207	12.9569	8.32208	7.79962	22.2309
63.5		8.37253	8.91121	3.24083	6.79268	5.86479		6.96722	6.23447		15.0427	4.57833	11.479				5.86377	13.1208	12.1685	8.12119	8.41435	22.5414
64		9.59637	9.47175	2.54087	7.8067	5.98311		6.98409	5.46415		14.6045	6.35649	14.3558				6.22751	15.1209	11.3801	7.9203	9.02909	22.8518
64.5		7.9133	8.67187	3.5667	6.52847	6.04033		6.42443	5.37387		14.5173	7.37057	12.7262				6.04012	12.4161	11.981	7.77904	9.23292	23.7391
65		6.23022	7.87199	4.59253	5.25024	6.09755		4.87368	3.7079		13.9496	12.6935	16.6092				5.85273	9.71134	12.5818	7.63779	9.43675	24.6264
65.5		7.46569	8.05216	3.91422	6.00989	6.51746		6.44584	6.16362		13.7308	11.5235	12.8757				5.42338	12.3519	12.7835	7.6093	9.1225	23.8363
66		8.70115	8.23234	3.23591	6.76954	6.93737		6.39062	5.1955		14.325	7.50674	13.8557				4.99402	14.9924	12.9851	7.58082	8.80825	23.0462
66.5		7.16516	10.4559	2.8608	7.16219	6.96521		6.32509	4.46358		13.2736	8.86839	16.7789				5.87677	14.1446	12.0265	7.43121	8.45942	22.6379
67		5.62915	12.6794	2.48568	7.55483	6.99305		5.30029	5.85519		14.3722	3.58042	15.6773				6.75951	13.2968	11.0678	7.2816	8.11059	22.2295
67.5		8.55221	12.2601	3.48968	7.00096	6.86976		4.95707	5.61245		13.4248	5.81092	16.5778				5.4039	13.8945	12.2954	7.28065	8.53671	23.5562
68		11.4753	11.8408	4.49367	6.44709	6.74646		6.52253	6.12673		15.5344	8.20431	15.013				4.0483	14.4921	13.5229	7.27969	8.96284	24.883
68.5		9.76381	10.7437	3.36845	5.16932	6.27358		5.11409	5.9854		12.3015	8.01507	15.2835				6.31825	14.2674	12.1244	7.70407	9.51566	23.7693
69		8.05235	9.64668	2.24322	3.89154	5.80069		4.32468	4.54454		19.2847	4.83677	14.4909				8.58821	14.0426	10.7259	8.12845	10.0685	22.6557
69.5		8.41151	9.59016	2.16936	4.85428	6.1269		5.5876	5.42431		15.821	3.98207	17.1613				8.0347	14.0275	11.4441	8.11767	9.36671	22.4878
70		8.77067	9.53364	2.09551	5.81702	6.45311		6.32895	5.8804		13.7019	8.74381	13.4657				7.48119	14.0124	12.1623	8.1069	8.66493	22.32
70.5		7.35177	10.2892	2.67838	6.26215	6.44072		6.5728	5.53653		15.0022	9.66932	16.3916				6.60951	14.9616	12.9244	8.22178	8.93814	22.8549
71		5.93287	11.0448	3.26125	6.70728	6.42833		5.61355	5.89826		15.0128	4.19693	16.8342				5.73783	15.9109	13.6865	8.33667	9.21135	23.3898
71.5		5.54854	9.10332	4.11632	5.01153	6.9786		6.81147	5.56354		15.2992	3.18355	16.1609				6.68519	15.3758	14.0838	8.12822	9.75643	23.2718
72		5.16421	7.16183	4.9714	3.31578	7.52886		7.27802	6.16591		14.1761	7.59411	15.7708				7.63255	14.8406	14.4811	7.91978	10.3015	23.1537
72.5		5.80558	8.7725	3.62037	3.96445	6.74466		6.84096	5.42789		11.8442	8.63725	18.448				7.48165	15.0547	14.0006	8.25364	9.96594	23.5252
73		6.44695	10.3832	2.26935	4.61312	5.96045		7.03439	5.07303		12.8656	4.40939	12.2376				7.33075	15.2688	13.52	8.5875	9.63037	23.8967
73.5		6.28331	11.2692	2.69537	4.88602	5.97571		6.6623	5.09119		12.7418	11.1534	16.3276				6.20008	12.2315	11.869	8.09663	8.99215	23.0186
74		6.11966	12.1553	3.1214	5.15891	5.99096		6.31404	5.51794		16.0867	10.0576	14.9211				5.06942	9.19415	10.218	7.60576	8.35393	22.1406
74.5		5.51479	11.0303	3.47831	4.84895	6.40326		5.5762	6.55679		12.8459	2.81251	15.6419				5.39931	12.3768	11.3252	7.97787	8.94809	22.5856
75		4.90991	9.90531	3.83523	4.53899	6.81556		7.79313	4.4275		14.6376	10.7329	17.0391				5.7292	15.5595	12.4323	8.34998	9.54224	23.0306
75.5		6.53429	9.88252	3.16045	4.69572	5.66159		4.79928	5.57903		13.1676	3.50902	16.2621				5.33541	15.2226	12.8049	7.97902	9.93778	22.9342
76		8.15867	9.85974	2.48568	4.85244	4.50762		6.21931	6.56733		17.7117	3.37807	14.533				4.94162	14.8856	13.1775	7.60806	10.3333	22.8378
76.5		10.0282	10.5354	2.65286	4.288	5.6561		5.42391	5.25635		14.2803	5.93419	13.9989				5.53524	14.449	14.0136	7.40173	10.3119	23.9356
77		11.8977	11.2111	2.82004	3.72356	6.80458		5.63909	6.66189		12.8131	1.94565	13.8641				6.12885	14.0124	14.8497	7.19539	10.2905	25.0333
77.5		9.79362	10.7407	2.64561	4.82286	6.36897		5.76524	6.98295		15.2102	5.86792	14.7027				6.36518	14.0414	13.9033	7.65921	10.2524	24.9656
78		7.68958	10.2703	2.47118	5.92216	5.93336		4.8975	5.37999		14.0341	4.46426	13.0628				6.60151	14.0705	12.9569	8.12303	10.2143	24.8978
78.5		7.66611	9.58583	2.39102	5.90202	6.77359		5.96827	6.43951		12.3488	6.01696	14.1243				6.53784	13.9838	11.8823	8.24302	10.1117	24.686
79		7.64264	8.90133	2.31087	5.88187	7.61382		5.67453	7.25075		15.9707	6.05334	12.3956				6.47416	13.8971	10.8078	8.36302	10.0092	24.4742
79.5		8.73958	9.37183	1.7421	4.64399	7.24626		6.89037	6.23642		11.1805	2.34357	14.0705				6.05271	15.7655	11.3303	8.71289	9.67616	25.7283
80		9.83652	9.84232	1.17332	3.4061	6.8787		7.23637	6.76988		16.2104	6.66997	14.8559				5.63125	17.6339	11.8528	9.06276	9.34312	26.9823
80.5		7.54802	9.57201	1.67229	3.97241	7.92801		6.42153	5.56974		16.2027	3.68946	11.8084				5.57421	17.2967	12.07	9.10391	10.6748	26.4131
81		5.25953	9.30169	2.17126	4.53872	8.97732		6.28301	6.42466		13.7683	8.84433	10.1713				5.51717	16.9595	12.2871	9.14506	12.0064	25.8438
81.5		5.01127	9.9858	2.46101	3.61637	7.6142		5.58542	5.26152		12.6084	8.41035	15.5076				4.5047	15.2994	12.5467	8.86721	11.8369	25.1567
82		4.763	10.6699	2.75075	2.69402	6.25108		6.18609	5.9347		12.4623	8.18398	14.5731				3.49222	13.6392	12.8063	8.58936	11.6673	24.4696
82.5		7.3217	10.03	2.79317	3.59537	6.53212		5.73367	5.34817		15.6546	6.6778	13.1363				4.0572	14.267	13.6185	8.98722	10.6719	24.5779
83		9.8804	9.39007	2.83559	4.49672	6.81316		7.495	6.00646		14.3141	7.73281	13.0264				4.62219	14.8947	14.4308	9.38507	9.67645	24.6863
83.5		6.63437	9.70701	2.42429	3.89608	6.20205		5.74645	6.92498		13.4863	5.79057	12.2962				5.07007	15.4173	13.434	8.7153	11.2531	22.8301
84		3.38834	10.0239	2.01299	3.29545	5.59094		5.70755	6.97584		13.4351	6.68601	13.2547				5.51796	15.9398	12.4373	8.04553	12.8298	20.9739
84.5		8.65073	9.58118	2.12881	3.72166	6.1759		5.8657	6.33172		15.5672	4.19693	13.9465				6.17995	17.1287	13.0636	8.31769	11.3453	22.2759
85		13.9131	9.13842	2.24462	4.14787	6.76086		4.53562	6.0222		14.411	3.13125	12.9851				6.84195	18.3175	13.6899	8.58986	9.86092	23.5779
85.5		12.011	10.0471	2.80839	4.30298	7.32086		6.08009	5.35942		16.7297	4.6319	11.6423				7.0037	15.9243	13.0376	8.71143	10.0757	23.3696
86		10.1089	10.9559	3.37216	4.45809	7.88086		5.55399	6.98999		14.8188	4.72668	18.1763				7.16546	13.5312	12.3853	8.833	10.2905	23.1613
86.5		10.5085	10.8155	2.68784	3.71707	7.17676		5.54702	5.27498		14.2689	4.20946	18.3186				7.42657	13.2831	13.5641	9.07084	10.8508	24.1775
87		10.9081	10.6751	2.00351	2.97605	6.47267		6.30319	6.0655		14.4089	5.20064	16.4098				7.68768	13.0351	14.7428	9.30868	11.4112	25.1937
87.5		10.4193	12.3603	2.88577	4.80845	6.84636		7.24714	5.96325		14.5841	3.91192	12.1944				7.24045	13.2944	15.2981	9.02285	11.722	24.2176
88		9.93039	14.0455	3.76803	6.64085	7.22005		7.19025	5.33231		16.1074	3.00211	18.0888				6.79322	13.5538	15.8534	8.73702	12.0328	23.2416
88.5		8.01902	12.3128	2.33438	5.95674	7.17529		5.85834	6.24489		13.9673	3.01141	15.4025				7.20034	13.0685	13.9589	8.9328	10.6483	24.3031
89		6.10765	10.5801	0.900726	5.27262	7.13053		6.44584	6.72352		14.7388	5.19864	12.1139				7.60746	12.5832	12.0645	9.12859	9.26382	25.3645
89.5		4.72327	10.5011	1.05479	4.78544	6.93793		6.58132	6.23687		16.1277	11.1257	16.2462				6.70465	12.3811	13.1588	9.00866	9.76308	26.3442
90		3.33889	10.4221	1.20885	4.29826	6.74533		7.46507	6.61721		16.2599	8.93864	15.7702				5.80184	12.179	14.2531	8.88873	10.2623	27.3239
90.5		5.82428	10.7272	0.851161	4.03298	7.49776		6.92656	4.41197		14.9119	3.99337	14.6354				6.30463	11.9032	13.9816	9.28327	9.47262	26.3105
91		8.30968	11.0323	0.493475	3.7677	8.25019		6.26339	5.20371		16.0394	4.59074	17.0373				6.80741	11.6274	13.7101	9.67782	8.68288	25.2972
91.5		7.14235	9.4165	1.83996	3.30501	8.32213		6.7748	6.15753		14.5985	6.42426	19.6974				7.30191	13.9859	13.023	9.43207	8.46697	24.4343
92		5.97502	7.80074	3.18644	2.84232	8.39406		6.63687	5.42283		15.6205	3.62282	16.96				7.7964	16.3444	12.3359	9.18633	8.25106	23.5715
92.5		8.17179	8.72947	2.46788	3.41846	7.83662		6.39425	6.80731		14.3005	2.61329	11.4303				6.92725	15.2432	12.0768	9.46449	9.94936	23.9537
93		10.3686	9.6582	1.74931	3.99461	7.27918		6.52274	7.18272		14.5197	2.90558	16.8359				6.05809	14.1421	11.8176	9.74264	11.6477	24.3359
93.5		10.5467	9.74306	1.78592	3.86517	6.86105		7.32597	5.66682		13.7591	6.58424	17.3624				6.11537	14.6942	13.6984	9.65833	10.5665	24.5278
94		10.7248	9.82793	1.82254	3.73573	6.44291		6.58163	6.06447		13.2908	3.35848	16.8843				6.17265	15.2462	15.5792	9.57402	9.48534	24.7198
94.5		11.0415	9.0204	2.16219	3.0628	6.05571		7.19119	6.21798		14.0207	4.12532	16.8681				6.62159	14.4013	14.299	9.11924	8.95123	24.9846
95		11.3581	8.21287	2.50184	2.38987	5.66852		8.02688	5.41229		14.646	6.05028	12.4446				7.07054	13.5563	13.0188	8.66446	8.41712	25.2495
95.5		11.1978	8.27695	2.2784	3.25143	7.1841		8.34526	6.2145		14.976	8.50393	15.4898				6.55505	13.0194	13.7839	8.68434	9.47447	25.3608
96		11.0375	8.34103	2.05497	4.11299	8.69969		7.43733	5.83543		13.436	6.14107	16.7549				6.03956	12.4824	14.5491	8.70421	10.5318	25.4721
96.5		8.21338	9.54871	1.93026	4.72898	7.68126		7.58251	6.7251		13.4795	3.78659	15.5043				6.53228	13.093	13.7602	8.29689	10.2469	24.8396
97		5.38921	10.7564	1.80555	5.34497	6.66282		7.29437	5.85516		11.9779	4.81524	16.1245				7.025	13.7035	12.9713	7.88956	9.96204	24.2071
97.5		8.19833	10.9985	2.69782	4.38873	7.37462		7.53434	6.16419		12.8086	6.0625	16.2271				6.47284	12.9304	13.3294	8.1132	9.67116	23.4077
98		11.0075	11.2405	3.59009	3.43248	8.08642		7.91177	5.72624		13.5707	6.1982	14.7721				5.92067	12.1573	13.6874	8.33684	9.38028	22.6083
98.5		7.64239	11.2785	3.72398	3.79869	7.27737		6.74215	7.65558		15.0796	5.49833	14.7724				5.88544	12.8605	12.8983	8.5252	10.0849	25.2468
99		4.27733	11.3166	3.85787	4.1649	6.46833		6.34658	5.48357		15.4504	8.28048	15.3866				5.8502	13.5638	12.1092	8.71356	10.7894	27.8852
99.5		6.49979	11.5106	3.56969	4.54882	6.61604		5.96373	6.42591		13.2682	7.26187	17.4322				6.28378	15.1443	12.7645	8.60405	10.2201	26.4968
100		8.72225	11.7046	3.28151	4.93274	6.76375		8.13236	6.94782		17.183	1.35008	13.5395				6.71735	16.7249	13.4198	8.49453	9.65068	25.1084
100.5		7.35845	10.5595	2.36183	4.70469	7.93632		7.14924	5.49063		12.9931	0.25538	17.858				5.71043	17.1318	13.9231	8.72755	9.18822	24.872
101		5.99464	9.41431	1.44216	4.47664	9.1089		6.83946	7.6351		15.0355	3.53088	14.0532				4.70351	17.5387	14.4265	8.96056	8.72576	24.6356
101.5		9.01554	7.92268	2.32836	3.49839	7.25059		7.09454	6.19115		13.9968	10.7087	17.7662				5.58961	16.7916	13.0149	8.77937	8.95241	25.3776
102		12.0364	6.43105	3.21457	2.52013	5.39229		9.07442	5.76914		15.8973	5.42803	14.1955				6.4757	16.0445	11.6034	8.59819	9.17906	26.1196
102.5		8.22753	8.43951	2.69139	2.86042	5.49381		7.19119	4.67855		14.5013	2.01452	17.5383				5.37427	15.7087	12.764	8.36574	8.58858	25.5052
103		4.41863	10.448	2.16822	3.2007	5.59532		6.517	6.8911		16.218	5.98621	14.6127				4.27283	15.3728	13.9247	8.13329	7.99811	24.8907
103.5		8.23101	9.79222	2.69799	3.76148	6.90001		8.17481	6.36768		15.1119	10.5706	14.4496				4.90729	14.5145	14.128	8.83609	8.45288	23.9306
104		12.0434	9.13648	3.22777	4.32225	8.20469		9.75083	5.80818		16.3966	8.37201	14.7563				5.54175	13.6562	14.3314	9.53889	8.90764	22.9705
104.5		9.91278	10.1923	2.35698	4.21971	7.60909		8.44916	6.20604		14.6456	7.54049	14.4306				6.42665	13.3042	13.4175	9.23967	8.89066	24.347
105		7.78219	11.2482	1.4862	4.11718	7.01348		7.95788	5.58544		14.7846	4.71945	15.703				7.31156	12.9523	12.5036	8.94045	8.87368	25.7235
105.5		6.18071	11.1628	1.6248	3.12383	6.32617		7.54299	5.32094		13.9252	5.9183	14.8289				7.01666	13.2967	12.2906	8.90764	9.20922	27.0173
106		4.57923	11.0773	1.76341	2.13049	5.63886		8.13222	5.09591		15.4999	7.70193	12.7				6.72175	13.6412	12.0777	8.87483	9.54475	28.311
106.5		7.95481	11.0365	1.91022	3.44306	6.99325		8.454	5.20606		15.322	7.68552	17.6011				6.28441	13.4349	12.1918	8.93154	9.26754	27.498
107		11.3304	10.9957	2.05704	4.75563	8.34763		8.63987	4.92466		14.7108	9.59584	13.6377				5.84706	13.2286	12.306	8.98826	8.99032	26.685
107.5		7.217	10.4059	1.77425	3.76656	8.08193		6.15123	5.63237		13.3613	9.80438	13.8612				6.89485	14.5326	11.6225	8.97336	9.6068	26.9836
108		3.10362	9.81601	1.49147	2.77749	7.81623		8.6533	5.23914		13.7916	2.4621	14.6168				7.94265	15.8366	10.9389	8.95847	10.2233	27.2822
108.5		6.1567	9.94158	2.49146	3.83471	7.49981		8.10934	7.92728		17.3783	12.2706	16.4705				6.88811	15.8216	12.2795	8.93532	9.62612	26.0811
109		9.20978	10.0671	3.49144	4.89193	7.1834		8.71972	5.93486		13.2775	8.35148	15.5028				5.83358	15.8066	13.6201	8.91217	9.02895	24.8799
109.5		7.5924	9.80658	2.94205	4.66225	6.97809		9.67269	7.03653		13.7757	8.82795	14.0692				6.56074	14.0722	13.1261	9.24366	8.76007	25.6157
110		5.97502	9.54602	2.39267	4.43257	6.77278		7.5522	5.68249		15.7459	4.50178	14.509				7.28791	12.3377	12.6321	9.57514	8.49118	26.3515
110.5		9.67985	11.0767	2.53389	4.64089	6.12584		6.64738	5.65694		13.1795	5.61783	17.4304				6.52269	13.5379	13.8142	9.86962	7.7905	25.9221
111		13.3847	12.6073	2.67511	4.84921	5.47889		6.34363	4.97684		14.1471	10.0249	20.449				5.75748	14.738	14.9964	10.1641	7.08983	25.4927
111.5		10.9032	12.3141	2.53721	4.61805	6.30768		6.90276	5.51608		16.1283	6.16137	15.3033				5.69294	14.941	14.2658	9.52457	8.45865	25.3379
112		8.42168	12.0209	2.3993	4.38689	7.13647		7.24144	6.02154		16.6891	7.76201	15.3748				5.62839	15.144	13.5351	8.88503	9.82747	25.1831
112.5		7.80686	11.2511	2.44594	4.97811	7.02027		8.89214	4.8323		13.7092	9.70166	16.3803				5.78623	14.7511	12.7342	9.24239	10.4046	26.2574
113		7.19204	10.4813	2.49258	5.56934	6.90407		8.59493	5.38939		14.852	9.91397	16.0825				5.94407	14.3582	11.9334	9.59976	10.9818	27.3318
113.5		6.29063	10.9092	2.81144	4.55012	8.75631			5.66258		14.5437	7.07713	16.4873				5.89154	15.0549	12.1442	9.83876	10.6549	26.9263
114		5.38921	11.3371	3.13031	3.53091	10.6086			5.74684		14.7652	7.12254	16.9944				5.839	15.7515	12.355	10.0778	10.328	26.5209
114.5		7.95226	11.1301	3.07097	3.97703	8.64796			5.73487			7.28584	15.4667				6.06871	15.7978	12.8334	9.61949	9.942	25.7175
115		10.5153	10.9231	3.01163	4.42316	6.68736						7.78992	13.8981				6.29843	15.8441	13.3119	9.16122	9.55603	24.9142
115.5		10.0786	10.2471	3.05517	4.44735	6.33717											6.84595	15.5199	13.4496	8.93794	9.18788	25.8148
116		9.6419	9.57101	3.0987	4.47153	5.98697											7.39348	15.1958	13.5872	8.71466	8.81973	26.7154
116.5		7.27004	10.8695	2.26669	4.52799	6.33874											6.95613	13.801	15.0251	8.82593	9.49068	27.0885
117		4.89817	12.1679	1.43468	4.58446	6.69051											6.51878	12.4063	16.463	8.93721	10.1616	27.4616
117.5		7.6897	11.3436	1.32466	4.13686	7.56332											6.35256	13.2977	13.2529	9.02481	8.77507	25.8527
118		10.4812	10.5192	1.21464	3.68926	8.43613											6.18633	14.1891	10.0428	9.11242	7.3885	24.2437
118.5		10.5638	10.9497	1.79615	3.31343	8.07727											6.16637	14.0599	11.5625	9.42172	8.34385	25.2991
119		10.6464	11.3802	2.37765	2.9376	7.71841											6.14641	13.9308	13.0821	9.73103	9.2992	26.3545
119.5		7.1391	9.5339	2.64178	3.49079	7.86076											6.54252	15.3202	12.5507	9.68114	10.001	27.1506
120		3.63179	7.6876	2.90592	4.04397	8.00311											6.93863	16.7096	12.0193	9.63125	10.7028	27.9467
120.5		4.25611	8.9152	1.79133	3.9274	7.88206											6.51434	14.0519	13.3515	9.71612	10.1899	29.0172
121		4.88043	10.1428	0.67673	3.81082	7.76101											6.09005	11.3943	14.6837	9.80098	9.677	30.0877
121.5		6.1587	9.01031	0.760698	4.34049	7.40995											5.81621	13.2556	13.6885	9.53062	9.51292	27.3893
122		7.43696	7.87781	0.844665	4.87016	7.05889											5.54237	15.1169	12.6932	9.26025	9.34883	24.691
122.5		3.62121	9.00592	1.47066	4.69458	7.51609											6.18374	14.7457	12.3185	9.24294	10.1935	24.8076
123		-0.19454	10.134	2.09665	4.51899	7.97329											6.82511	14.3745	11.9438	9.22563	11.0382	24.9241
123.5		2.4247	10.9196	2.49794	4.31754	7.53247											6.50011	13.2835	12.2517	9.13955	10.5143	26.0396
124		5.04394	11.7052	2.89923	4.11608	7.09166											6.1751	12.1924	12.5596	9.05346	9.99031	27.155
124.5		7.8999	12.589	1.86678	3.75714	7.74127											7.36482	11.6444	12.9716	9.43517	10.4271	26.2933
125		10.7559	13.4728	0.834337	3.39819	8.39087											8.55454	11.0964	13.3836	9.81687	10.864	25.4315
125.5		11.7713	10.5489	1.31506	4.11667	8.04464											7.92684	12.277	13.2693	9.35039	11.8286	25.5617
126		12.7867	7.62495	1.79579	4.83516	7.69841											7.29913	13.4577	13.155	8.8839	12.7933	25.6919
126.5		11.3563	7.16024	2.59102	4.29928	7.84915											6.59576	13.0107	13.6418	9.11918	11.7095	25.8992
127		9.92581	6.69554	3.38625	3.7634	7.99988											5.89239	12.5638	14.1285	9.35445	10.6258	26.1064
127.5		8.90453	8.55076	2.20379	3.82662	8.39041											6.2552	11.9576	13.6608	9.34623	10.1081	27.9655
128		7.88325	10.406	1.02134	3.88984	8.78094											6.61801	11.3515	13.1931	9.33801	9.59039	29.8245
128.5		9.58839	11.2722	2.18978	4.58084	8.93861											7.00281	12.4976	13.997	9.25101	9.17874	29.3373
129		11.2935	12.1384	3.35822	5.27184	9.09627											7.3876	13.6437	14.8009	9.16401	8.76709	28.85
129.5		11.0166	11.171	3.48729	5.13655	9.50369											6.90494	15.3185	13.8402	9.39625	9.41224	27.696
130		10.7396	10.2036	3.61637	5.00126	9.9111											6.42228	16.9932	12.8796	9.62849	10.0574	26.542
130.5		8.84934	10.1701	2.17087	4.23643	9.29189											6.84664	16.6862	13.4603	9.25004	9.71555	25.7863
131		6.9591	10.1366	0.725381	3.47159	8.67267											7.27101	16.3791	14.0409	8.87158	9.37371	25.0305
131.5		7.21338	10.1202	0.862477	3.49008	8.2052											7.32445	15.0585	13.5485	9.03971	9.75125	25.208
132		7.46765	10.1037	0.999573	3.50857	7.73772											7.3779	13.7379	13.0561	9.20783	10.1288	25.3854
132.5		10.5229	11.7291	1.51208	3.7916	6.99485											6.86559	12.0375	13.7629	9.4145	9.09052	26.1662
133		13.578	13.3545	2.02459	4.07463	6.25198											6.35328	10.3372	14.4697	9.62118	8.05226	26.947
133.5		11.5646	11.2651	1.69711	3.88195	7.41658											5.93695	12.1892	13.7205	9.68976	9.42978	26.6981
134		9.55111	9.17568	1.36962	3.68926	8.58118											5.52062	14.0412	12.9713	9.75834	10.8073	26.4492
134.5		9.73041	8.73528	1.80749	3.33498	8.54528											5.93044	14.735	14.3766	9.17523	11.1713	26.7177
135		9.90971	8.29487	2.24537	2.98069	8.50938											6.34027	15.4287	15.7818	8.59212	11.5353	26.9861
135.5		8.71873	8.36539	2.27633	3.72668	8.1828											6.25385	15.0288	15.3915	9.0592	10.6113	27.372
136		7.52776	8.43591	2.30729	4.47266	7.85623											6.16743	14.6289	15.0011	9.52627	9.68727	27.758
136.5		8.32899	9.00885	2.04292	4.81331	7.74396											6.67751	15.0047	14.0092	9.45755	10.0215	27.178
137		9.13021	9.58178	1.77856	5.15397	7.6317											7.1876	15.3805	13.0173	9.38882	10.3557	26.598
137.5		8.54164	8.68762	3.00612	3.90833	7.48946											6.62744	14.1896	12.5721	9.55688	10.3272	27.5827
138		7.95307	7.79346	4.23368	2.66268	7.34722											6.06728	12.9986	12.1269	9.72495	10.2987	28.5673
138.5		7.46796	10.2654	3.01905	3.11418	6.88746											6.8196	16.8859	12.3471	8.79655	10.553	29.0412
139		6.98286	12.7373	1.80442	3.56568	6.42769											7.57193	20.7733	12.5674	7.86816	10.8073	29.5151
139.5		7.64279	11.2095	2.15249	2.89465	7.94278											7.20719	18.0459	13.0787	8.67318	11.1719	28.9219
140		8.30273	9.68177	2.50056	2.22361	9.45788											6.84246	15.3186	13.5901	9.4782	11.5365	28.3286
140.5		6.20075	10.522	2.42891	2.89651	7.71989											6.48716	16.5515	12.9865	9.7349	11.2282	27.0708
141		4.09877	11.3622	2.35725	3.5694	5.9819											6.13187	17.7843	12.3829	9.99161	10.9199	25.813
141.5		7.47941	10.7167	1.12503	3.51668	7.08736											6.91775	15.2328	13.2661	9.767	9.82285	24.3506
142		10.86	10.0712	-0.10719	3.46397	8.19282											7.70364	12.6814	14.1492	9.54238	8.72576	22.8882
142.5		10.1995	10.9733	0.889911	4.16826	7.62226											7.37423	14.2056	13.6838	9.76713	9.58298	26.048
143		9.53902	11.8754	1.88701	4.87255	7.0517											7.04482	15.7298	13.2185	9.99187	10.4402	29.2077
143.5		9.26576	10.062	1.46319	4.99155	8.54526											6.87006	15.9788	14.5724	9.78317	9.45237	26.5021
144		8.9925	8.24854	1.03936	5.11056	10.0388											6.69529	16.2278	15.9263	9.57447	8.46454	23.7965
144.5		9.04097	9.36836	1.74082	4.26412	9.52187											6.67759	16.389	15.2147	10.1648	8.24659	23.9608
145		9.08944	10.4882	2.44228	3.41768	9.00493											6.65988	16.5502	14.5032	10.7551	8.02863	24.1251
145.5		6.86628	10.7787	2.78964	3.62226	8.6046											7.62118	14.8583	14.8826	9.97946	8.12126	25.8103
146		4.64313	11.0692	3.137	3.82683	8.20427											8.58248	13.1664	15.2621	9.20384	8.2139	27.4956
146.5		6.03007	10.0766	3.69179	3.8519	8.55667											8.41441	12.5109	14.7651	9.56543	8.13648	28.3695
147		7.417	9.08402	4.24659	3.87696	8.90907											8.24635	11.8554	14.268	9.92703	8.05906	29.2434
147.5		8.82243	9.57944	3.18717	3.6312	8.4266											7.75161	14.4474	13.642	9.79632	7.94046	28.2451
148		10.2279	10.0748	2.12775	3.38544	7.94414											7.25687	17.0393	13.016	9.66561	7.82186	27.2468
148.5		11.6872	10.0795	2.60561	4.13227	7.93147											7.58555	16.4762	13.538	9.26182	8.60919	26.1441
149		13.1465	10.0841	3.08347	4.8791	7.91881											7.91423	15.9131	14.06	8.85802	9.39653	25.0413
149.5		9.68717	9.64994	2.94215	4.80063	8.3914											7.81929	15.605	12.5195	9.28477	9.85328	26.9358
150		6.22788	9.21576	2.80082	4.72217	8.86399											7.72435	15.2968	10.979	9.71152	10.31	28.8304
150.5		7.82441	9.66855	1.90166	4.70093	8.72647											7.15663	15.7606	12.422	9.72138	11.0066	29.6899
		9.42094	10.1213	1.00249	4.67968	8.58895											6.58891	16.2243	13.8649	9.73123	11.7031	30.5495
		8.31519	10.3095	1.89805	4.72265	8.66081											7.17751	15.4732	13.2927	10.2408	9.61793	28.4548
		7.20944	10.4976	2.7936	4.76563	8.73267											7.7661	14.7221	12.7204	10.7504	7.53278	26.3602
		8.72991	10.7768	2.91809	4.4526	8.67498											7.46399	13.6333	13.0483	9.73421	8.81048	28.2605
		10.2504	11.0561	3.04257	4.13958	8.61729											7.16187	12.5445	13.3762	8.71801	10.0882	30.1609
		10.0509	10.8915	3.59569	4.62826	7.83625											7.28404	13.7801	13.5085	9.29638	9.85726	29.5125
		9.85136	10.727	4.14881	5.11693	7.05521											7.40622	15.0157	13.6408	9.87476	9.62634	28.864
		10.1808	10.5804	3.1866	4.44765	6.61509											7.31398	16.729	12.8183	9.80789	9.75957	28.7658
		10.5103	10.4338	2.22439	3.77837	6.17497											7.22175	18.4422	11.9958	9.74103	9.89281	28.6675
		10.0347	9.60618	2.35191	4.78351	7.74313											7.68414	17.5825	13.1573	9.70974	9.84776	28.9666
		9.55903	8.77851	2.47942	5.78864	9.3113											8.14653	16.7228	14.3189	9.67845	9.80271	29.2656
		9.94677	9.62429	2.05754	6.79305	8.16312											7.0777	16.1739	13.6613	9.90943	9.8839	28.5845
		10.3345	10.4701	1.63566	7.79745	7.01494											6.00886	15.625	13.0037	10.1404	9.96508	27.9034
		10.5375	9.70837	2.36005	6.06571	7.25141											6.9805	16.4343	13.6421	9.6788	10.4245	29.0346
		10.7406	8.94668	3.08444	4.33398	7.48789											7.95213	17.2435	14.2805	9.21721	10.884	30.1659
		9.68826	9.35028	2.13415	5.02239	8.87628											7.91411	16.7749	15.0321	9.2791	10.796	29.4748
		8.63597	9.75389	1.18386	5.71081	10.2647											7.8761	16.3064	15.7836	9.34099	10.7079	28.7837
		9.42616	10.3924	1.79949	6.13689	8.42936											8.41875	15.2871	14.9929	8.9059	10.7311	29.6341
		10.2164	11.0309	2.41512	6.56296	6.59404											8.9614	14.2678	14.2021	8.47081	10.7544	30.4845
		9.16079	10.3504	2.68995	6.40296	6.84728											7.85865	15.8681	14.1657	8.77149	10.637	30.8881
		8.10523	9.67	2.96478	6.24296	7.10052											6.7559	17.4684	14.1292	9.07216	10.5196	31.2918
		10.2707	10.3633	3.45704	4.61183	7.6167											6.79307	16.5449	14.7782	9.14195	9.94664	30.813
		12.4361	11.0566	3.94929	2.98069	8.13289											6.83023	15.6214	15.4273	9.21175	9.37371	30.3343
		9.74377	11.3835	3.21593	3.69382	7.17615											7.05084	15.1535	15.87	9.53872	9.56295	30.8014
		7.05141	11.7105	2.48257	4.40695	6.21942											7.27146	14.6857	16.3127	9.8657	9.75219	31.2686
		7.36731	11.8486	2.5439	3.07865	6.63323											7.90665	14.2445	15.603	9.49464	9.95114	30.3956
		7.6832	11.9868	2.60524	1.75035	7.04704											8.54183	13.8033	14.8932	9.12359	10.1501	29.5225
		8.19123	10.2213	2.3278	2.89085	7.70746											8.25215	14.8787	15.163	9.346	10.1483	28.9878
		8.69926	8.45592	2.05037	4.03134	8.36789											7.96246	15.954	15.4327	9.56841	10.1466	28.4531
		8.77154	9.02072	2.51886	2.88777	8.39804											6.8426	20.1493	14.3607	9.79627	10.019	28.5713
		8.84383	9.58552	2.98736	1.7442	8.42819											5.72275	24.3445	13.2888	10.0241	9.89152	28.6896
		10.265	10.6615	2.99911	2.09993	8.00553											6.42018	20.6682	14.2282	9.56067	10.1155	29.105
		11.6861	11.7376	3.01087	2.45565	7.58286											7.1176	16.9918	15.1677	9.09723	10.3394	29.5204
		10.2739	11.8049	2.56308	2.78773	7.15984											7.6285	15.7887	14.8187	9.13639	10.226	30.8763
		8.8616	11.8722	2.1153	3.11981	6.73681											8.1394	14.5856	14.4697	9.17556	10.1126	32.2323
		10.7917	12.3096	2.47786	4.36193	7.28936											8.2227	16.8195	14.9314	9.05581	11.3437	31.0641
		12.7218	12.747	2.84042	5.60405	7.84191											8.30601	19.0533	15.3931	8.93607	12.5748	29.896
		9.60945	11.3909	2.42182	5.24413	7.52569											7.72573	18.2628	14.6882	8.99803	11.4555	28.6836
		6.49713	10.0348	2.00322	4.88422	7.20947											7.14546	17.4723	13.9833	9.06	10.3363	27.4713
		8.73194	10.0193	2.03545	5.23302	7.11423											6.72594	18.4333	13.653	8.86961	10.4791	28.397
		10.9667	10.0038	2.06767	5.58182	7.019											6.30642	19.3942	13.3227	8.67922	10.6219	29.3227
		8.20595	9.47482	1.62869	5.77918	7.24819											7.09605	17.8499	13.6605	8.91167	10.8049	30.8811
		5.44514	8.94586	1.18971	5.97653	7.47739											7.88568	16.3057	13.9982	9.14413	10.9879	32.4394
		9.82872	7.57856	1.95636	4.63344	7.26043											7.8038	16.2863	14.1527	9.28343	10.1729	31.4524
		14.2123	6.21125	2.72301	3.29035	7.04347											7.72191	16.2669	14.3073	9.42273	9.3578	30.4654
		11.2445	8.06958	1.96106	4.23007	7.39038											8.39402	15.4868	14.6163	9.38957	10.1434	31.3048
		8.27677	9.9279	1.19911	5.1698	7.73729											9.06612	14.7066	14.9253	9.35641	10.9291	32.1442
		11.4905	10.3104	1.53801	5.29242	7.85716											9.53486	15.303	14.4769	9.11759	10.3153	33.1172
		14.7043	10.6928	1.87691	5.41505	7.97703											10.0036	15.8994	14.0285	8.87878	9.70157	34.0902
		12.6791	10.7354	2.29048	5.25704	7.97335											9.10617	15.7864	14.4417	9.23408	9.94416	33.261
		10.654	10.778	2.70405	5.09903	7.96966											8.20872	15.6733	14.8549	9.58938	10.1867	32.4317
		10.6931	11.5444	1.77178	4.95662	7.67634											8.48008	16.1693	15.0073	9.55635	10.1959	32.561
		10.7322	12.3109	0.839499	4.8142	7.38301											8.75144	16.6653	15.1597	9.52331	10.2051	32.6902
		7.70492	10.2353	1.89871	4.76933	7.19259											8.71742	17.2316	15.5003	9.95148	9.87705	32.1125
		4.67759	8.15973	2.95792	4.72445	7.00217											8.68339	17.798	15.841	10.3796	9.54896	31.5348
		9.21216	9.11904	1.88739	5.22459	7.06677											8.49061	16.069	14.1923	9.64144	9.04869	33.2969
		13.7467	10.0784	0.816864	5.72472	7.13136											8.29782	14.34	12.5437	8.90324	8.54841	35.059
		11.0997	10.6652	1.18187	5.45494	6.74635											7.18497	15.9423	13.6702	9.05951	8.86374	32.8279
		8.45262	11.2521	1.54687	5.18515	6.36135											6.07212	17.5446	14.7968	9.21578	9.17906	30.5968
		10.2138	11.5768	1.77946	5.92585	5.95963											7.27783	17.0706	15.5424	9.39713	9.38473	32.1227
		11.975	11.9014	2.01204	6.66654	5.55791											8.48354	16.5966	16.2879	9.57849	9.59039	33.6485
		9.26076	11.797	3.06297	5.49158	7.52223											8.56135	15.3484	15.6375	9.56982	10.2812	33.5691
		6.54654	11.6925	4.1139	4.31661	9.48655											8.63917	14.1002	14.987	9.56115	10.972	33.4898
		7.96681	11.5903	3.30104	5.11956	9.21984											8.27578	14.7933	14.6257	9.7014	10.463	33.2353
		9.38709	11.4881	2.48817	5.92251	8.95313											7.91239	15.4863	14.2645	9.84164	9.95394	32.9807
		7.45282	11.2081	2.45217	7.03862	8.77142											8.4931	15.1751	15.0088	9.39649	9.68302	31.4953
		5.51855	10.9281	2.41617	8.15473	8.58972											9.07381	14.8638	15.7531	8.95134	9.41211	30.0098
		5.85365	10.5998	1.49108	7.78381	7.53197											8.57552	15.4474	14.6103	9.62346	10.2644	30.8261
		6.18875	10.2715	0.565991	7.41289	6.47423											8.07723	16.0309	13.4675	10.2956	11.1166	31.6423
		8.24342	10.5491	1.61781	6.83387	8.25559											8.39811	16.6153	13.3581	5.14779	10.8652	31.8026
		10.2981	10.8268	2.66962	6.25485	10.037
		9.49962	10.6564	2.37871	6.2053	9.47974
		8.70115	10.486	2.08779	6.15575	8.92252
		6.1367	12.0168	2.97446	5.98008	8.20091
		3.57225	13.5476	3.86113	5.8044	7.47929
		5.44075	12.3693	1.93056	2.9022	3.73964

## Sheet: Figure 3H
unc44::gfp immobile fraction
	wild type	unc-119(de3)	unc-33(mn407)
w1	91.7452	93.7348	93.7952
w2	89.9156	94.1002	85.9389
w3	97.3121	95.1533	87.1166
w4	95.1487	85.5654	91.6643
w5	93.4556	94.1446	90.308
w6		85.4552	76.0736
w7

## Sheet: Figure 3I
	wild type										unc-33(mn407)													unc-44(hrt2)
time(s)	w1 20180109	w2 20180109	w3 20180109	w1 20180206	w2 20180206	w3 20180206	w4 20180206	w5 20180206	w6 20180206		20180202 w1	20180202 w2	20180202 w3	20180202 w4	20180306w1	20180306w1	20180606w1	20180606w2	20180606w3	20180606w4	20180606w5	20180606w6		20180202 w1	20180202 w2	20180202 w3	20180202 w4	20180202 w5	20180529w1	20180529w2	20180529w3	20180529w5	20180529w6
0	0	0	0	0	0	0	0	0	0		0	0	0	0	0	0	0	0	0	0	0	0		0	0	0	0	0	0	0	0	0	0
0.5	4.58823	2.32034	1.6783	11.6474	1.1903	3.14258	6.49307	4.26751	2.99383		3.10112	2.1107	7.98133	6.25964	2.08686	13.8142	7.07606	8.70898	2.19464	2.40055	5.79241	0.978195		18.4433	14.6478	10.4909	7.33417	12.9263	19.6585	13.3628	12.4716	6.23975	0.935626
1	2.89406	4.47718	3.41188	13.6501	3.85152	5.49772	9.57689	7.52035	2.07869		5.47459	10.8464	12.3529	8.00734	6.50364	11.1235	8.33241	13.3135	1.65298	5.80124	9.86067	3.87842		26.8265	26.7125	12.8533	14.1829	21.465	26.4936	20.4355	22.0877	12.4167	12.0669
1.5	3.11833	4.92158	5.10257	15.8971	7.37057	5.8625	10.5534	6.06483	2.07604		10.1512	12.6853	10.045	10.3976	6.64573	19.0867	10.1795	12.1193	5.75751	5.006	9.35385	5.82095		34.9722	27.9886	19.2831	17.1248	26.8599	36.3666	24.5064	33.5606	20.415	28.8141
2	6.63138	7.39648	6.12441	12.6965	8.29202	6.59631	11.9419	6.68568	4.39102		11.7616	12.16	12.5574	12.1293	7.29088	5.42155	12.0105	15.3362	5.41394	5.89684	7.66224	8.59915		36.0865	32.5813	20.8446	20.6503	33.7047	39.2203	35.9879	28.9983	31.7125	26.4176
2.5	5.92107	6.96246	5.27583	14.2114	7.28295	7.51213	9.41473	7.75056	3.85099		10.6915	15.5038	12.9353	14.9523	8.96299	15.5061	12.3336	13.0257	5.3981	9.46621	10.9088	10.4486		41.496	32.4131	24.2697	26.4314	34.8514	42.5568	31.082	37.6609	31.4401	37.7982
3	4.10857	6.90727	4.80285	17.3939	11.6369	6.42933	12.6885	9.70543	4.5966		15.3463	15.9686	12.091	14.4867	8.98132	12.0515	10.3676	15.5133	6.17294	10.5179	11.4276	7.12593		45.4686	32.616	24.2389	25.6583	37.5653	47.6514	30.4184	38.0888	42.1686	43.8586
3.5	6.50476	8.53161	6.84387	19.9809	10.7267	8.34853	11.2185	9.29405	6.22053		15.9954	20.428	13.9176	13.701	9.99385	24.4642	13.5827	15.9139	9.51952	10.309	14.4482	10.4512		48.7615	33.7326	24.1657	33.1122	39.3321	52.7841	36.4255	43.7827	44.2367	47.3283
4	7.50677	8.51991	6.89997	17.0441	13.3266	8.40187	13.8623	8.90202	6.5977		18.2274	16.2472	15.2093	19.2935	8.98116	13.5939	16.0441	20.758	9.9908	8.58931	16.2959	9.40253		53.5406	32.8329	30.2244	33.4582	45.3094	52.4637	32.6439	43.2701	47.3268	43.8845
4.5	5.21143	6.53718	7.51452	21.001	11.8331	9.31148	13.6768	9.13637	5.29445		19.3026	18.5775	18.7211	18.879	8.90205	22.8273	18.4354	16.6132	9.5567	10.3748	14.7924	11.1197		56.0768	36.6013	28.8221	38.4999	44.3304	54.1654	36.3603	42.2811	48.841	40.6998
5	6.71924	7.6049	7.12597	20.272	12.5989	9.02554	13.9349	10.6676	7.06283		20.0417	20.2828	19.2809	20.4687	10.016	19.1016	17.6744	18.8661	10.3321	13.5902	15.8274	10.6483		63.5904	38.864	32.7394	41.9522	42.7635	56.0159	44.6094	47.8585	48.45	36.0791
5.5	9.61854	10.0908	6.99476	19.9974	13.259	9.16276	14.328	13.4569	7.01631		22.7549	21.235	17.3974	17.6262	10.4137	22.772	15.0389	19.8338	11.1935	15.3865	16.3349	10.8884		65.5659	38.0751	33.1107	40.756	52.4263	58.1003	48.7669	46.659	55.2779	27.7731
6	10.3003	8.84346	8.55786	22.1208	13.6951	9.95551	15.7726	12.764	6.381		24.0798	22.7185	17.6415	17.6901	4.79644	15.289	16.3954	16.5594	12.2231	12.2169	21.6891	12.1227		58.2102	38.3782	35.1033	42.5512	48.0692	56.5222	50.1961	50.2983	56.3785	33.793
6.5	13.0004	10.3412	7.66661	22.294	14.6144	9.86166	13.6455	16.7518	6.71112		22.4871	17.4723	17.7645	20.683	9.23983	26.3821	16.3609	23.6039	12.4219	13.8729	18.4152	8.98669		48.9606	49.5886	32.0622	35.6065	57.2526	60.9517	41.7657	50.7595	48.6964	47.7955
7	7.27524	12.2299	6.74428	22.9142	15.3058	9.8485	15.5164	13.7892	6.56808		22.3734	19.9405	18.6528	20.9611	10.1417	26.4474	20.5397	22.216	13.9711	15.6425	20.483	12.0385		55.6802	48.6965	36.744	46.1393	56.4165	61.6828	53.4131	45.4461	47.077	47.7955
7.5	7.82847	12.9389	7.07639	20.0654	16.0349	10.7644	17.0116	14.959	7.19892		20.9224	19.4202	20.8145	22.7874	9.20196	24.5291	17.0588	17.4487	11.6091	13.9364	25.4655	13.9036		62.4124	48.9474	38.7256	42.6314	48.7829	64.0798	50.1958	48.2676	55.3428	47.8463
8	10.1995	10.7551	8.25669	26.165	16.5278	11.9541	18.4343	17.4078	8.51618		22.2352	21.0807	18.7915	21.0208	10.877	26.1821	21.7225	20.031	15.6239	14.7442	20.7322	13.9316		58.4067	48.0473	45.3082	49.0952	47.2818	67.635	39.1165	46.9521	54.7925	52.8202
8.5	10.8674	12.0726	8.91869	25.3222	16.9108	10.965	17.8791	15.3114	7.646		20.0965	24.2469	20.9759	21.4567	10.6818	28.9543	18.009	24.0699	11.9987	15.8844	20.26	14.8134		69.4486	43.5847	39.7003	48.0453	53.0987	71.6093	54.6876	49.3301	58.5354	49.0018
9	13.1208	12.9283	7.94456	25.1242	16.3469	12.0736	17.0039	16.3959	8.81334		21.7865	24.5569	24.2156	24.2276	9.48224	23.3298	23.4138	25.8961	13.9878	17.0859	23.6653	12.0101		65.2762	45.3711	41.0251	43.8076	54.1674	68.4596	57.5082	54.3237	62.1814	49.5606
9.5	12.4394	11.6025	8.75291	24.853	17.3741	12.5325	16.4803	16.0336	8.83551		25.8268	28.326	22.3707	22.9136	10.3741	19.1644	19.2837	22.8177	14.2666	16.1951	23.746	14.8939		68.5964	52.4178	44.6449	44.5268	61.7333	68.1104	55.4173	58.038	58.8706	46.4683
10	11.5699	11.476	8.86776	28.2613	18.0491	11.2784	16.7697	17.3192	7.73384		28.9567	25.575	20.4424	22.0709	11.4202	29.633	17.9575	22.3097	13.7296	17.1286	20.9749	14.2151		67.0234	49.625	42.1472	41.8869	62.8481	65.2535	60.1901	58.3668	55.9875	60.158
10.5	11.6919	11.3949	7.26258	23.0495	18.2123	12.8238	18.2915	17.8503	6.82703		29.2222	26.4164	25.3197	25.6734	11.4631	20.147	17.9967	24.5593	12.8187	18.9529	25.2521	13.9473		67.031	45.8334	41.4008	44.2759	62.0174	67.9543	52.9299	63.2465	57.517	54.2247
11	12.0245	10.5993	7.8849	27.91	16.6757	13.128	18.0927	17.4911	8.20231		30.5973	24.7702	22.309	26.745	11.6043	22.2253	21.5573	22.7537	14.0119	18.31	26.2725	13.5886		60.065	54.1446	42.3444	44.7922	64.1966	69.0992	54.6488	62.4785	67.146	38.6722
11.5	14.0032	12.0111	9.66366	27.3816	17.4934	12.4261	17.2296	20.9336	7.03376		28.5833	26.1027	24.9741	28.0181	11.8624	19.2162	23.597	23.0553	14.2355	20.21	20.7421	12.9304		72.4218	49.4751	45.3113	40.4618	64.9382	66.6384	63.863	60.2543	70.3042	62.2517
12	18.3501	11.1462	8.0055	25.8799	17.5967	12.2969	20.0686	19.793	9.04438		31.6013	26.7647	26.7109	29.6841	11.1343	29.5886	21.7369	21.3841	17.0471	20.7334	21.3627	12.5576		67.7491	48.8228	45.8876	44.6583	58.8485	72.4882	62.5226	56.3498	70.3803	70.0823
12.5	13.9399	14.2427	8.48677	21.7767	17.9794	13.7143	17.2567	19.1399	7.88251		30.4151	21.3949	25.5396	28.6903	9.82986	27.933	26.203	22.8069	17.9597	18.6774	20.3582	11.8176		67.914	50.2208	41.281	40.9319	61.9978	68.3029	55.7094	58.569	77.3922	57.4609
13	11.8415	13.5454	9.22608	24.7165	19.6983	14.4929	17.5831	18.4624	10.0056		29.066	22.9647	24.5724	27.902	11.303	27.7686	22.2983	23.76	16.7682	21.8165	19.7002	14.965		64.2297	51.319	45.1499	41.217	58.4022	71.8048	53.8522	64.3767	71.0813	59.2315
13.5	15.0786	11.4303	9.44296	24.5354	21.7304	13.8872	17.9694	18.9201	9.66042		32.5565	27.6231	24.6014	28.0011	11.5862	30.2582	22.6592	23.2963	18.7311	18.2775	21.4928	14.099		60.1292	51.0017	48.1541	42.5307	67.4075	72.2185	61.4892	60.6534	74.2139	66.8643
14	13.7334	12.3633	9.27923	23.3793	21.9066	15.0177	18.2552	16.9169	10.3675		28.7733	26.5568	26.5998	29.6458	10.6458	28.1634	24.1688	24.1381	18.8836	20.6934	17.4057	16.3978		66.493	62.1039	44.3359	48.0538	70.4884	73.5135	49.2279	65.6073	70.6759	69.5914
14.5	19.653	11.929	10.6402	25.5047	18.0584	14.9623	20.0493	19.1033	12.4454		33.4202	24.1687	25.3872	29.1912	11.7565	27.1934	22.4197	22.564	19.3748	21.8333	23.5703	18.0963		57.4453	55.6199	47.1101	44.2455	61.3257	70.67	56.997	65.1914	80.9631	65.2459
15	13.6524	13.0989	10.4454	31.638	23.2539	14.8943	23.0378	22.4131	10.3283		34.032	29.8023	27.1098	27.9741	10.433	28.535	27.582	26.078	19.5427	20.4234	16.5901	15.5615		63.4331	56.4984	47.5862	43.3503	65.8615	73.9235	57.8898	66.5305	85.3778	61.2554
15.5	13.6636	16.2415	11.0699	26.9349	19.983	13.8261	20.7751	20.2279	10.9518		31.839	31.9813	30.2967	30.815	12.27	30.1813	28.9653	23.4868	19.444	21.6046	21.8072	21.4653		58.4593	62.8871	45.5885	47.9717	67.0176	74.7606	52.7653	65.6698	79.0831	69.0731
16	14.2224	15.0629	10.0019	28.8413	19.9397	13.8094	20.9241	20.6579	10.7644		33.381	32.9136	29.8634	27.312	13.3258	25.1087	27.2144	29.2554	19.354	23.2007	22.9725	18.0619		59.358	67.3688	49.4883	40.306	68.8423	72.1693	59.2184	67.6788	76.4904	57.5936
16.5	12.9952	15.485	9.72454	30.0892	23.0916	12.927	21.3513	19.7126	10.9453		33.7865	29.1691	24.2328	28.4413	10.2241	32.3506	23.5089	27.1165	22.3249	24.134	20.922	19.9365		67.139	58.588	53.6173	45.3817	67.6692	74.7493	55.7224	68.8426	86.2271	65.1539
17	13.2814	14.3334	8.98645	28.8113	24.9086	14.7478	20.7233	22.5127	11.2162		34.6138	28.3861	28.5225	31.6919	10.9404	31.631	25.0779	29.3744	24.3021	22.4514	23.223	21.4709		57.4787	65.2364	56.0525	44.4914	68.8607	73.6861	63.1634	57.381	74.8546	66.2471
17.5	8.77272	14.6765	10.1487	29.3305	24.0695	13.8684	22.9036	22.9241	11.8702		31.6646	26.5326	30.0756	31.3931	12.9314	36.4059	22.8955	26.8341	23.8773	18.8834	25.612	21.7918		65.9762	60.1895	48.7803	48.3084	68.8667	74.3208	61.3647	61.2217	76.2746	67.0286
18	12.3841	13.9967	9.99409	29.7681	22.5911	15.2424	21.4173	21.1594	11.3505		35.086	28.643	31.1504	33.1744	12.2038	34.747	27.5654	26.6036	23.2129	21.6558	19.5073	17.8207		62.4576	62.8635	54.933	46.7945	73.0816	74.3173	57.6673	70.5716	75.5767	61.9128
18.5	14.2113	14.0262	11.2969	26.0501	24.0715	14.6398	22.9702	24.0676	10.56		30.8982	33.5027	29.8692	31.3262	12.7187	31.1094	22.687	28.6246	22.3155	21.5124	25.6617	20.4405		72.6261	63.5012	54.8085	46.4066	67.3805	73.6191	59.6286	64.9761	71.9931	50.4595
19	17.5301	15.5587	9.51156	30.2474	23.1764	15.6372	22.5056	22.3105	10.676		34.1705	31.3125	29.2195	28.8751	13.1519	34.0751	26.7939	27.7813	20.9102	23.7811	23.8744	21.2471		67.2167	56.7859	52.597	46.788	67.4427	72.4012	56.3403	73.319	72.8378	56.1339
19.5	16.1105	15.1346	10.2743	30.8484	25.822	15.4009	21.2298	21.2297	9.57781		30.9753	26.2145	31.3934	29.5733	13.5258	23.6788	25.9786	26.2433	21.2219	23.4483	26.7479	20.8967		62.6611	47.9959	52.9216	54.4529	73.6401	68.9963	61.211	63.7979	74.7133	58.6706
20	18.4811	17.2894	11.0299	26.0133	22.5419	15.8916	23.366	24.8385	10.3243		31.0292	29.5091	26.9749	29.6778	13.2824	38.8847	26.668	26.354	21.4349	21.5575	22.429	19.4705		69.3617	50.2895	57.4614	51.4887	68.3871	68.5085	55.6095	71.5431	72.0955	61.5945
20.5	17.0247	14.7719	10.8136	30.3597	21.8946	16.8166	25.2377	24.4004	9.261		31.5666	35.5433	29.1482	34.6259	10.598	31.4255	29.1067	30.68	21.9397	23.0843	25.7341	15.3021		59.0109	49.5155	54.8062	48.3906	69.4997	80.0459	60.3169	77.1637	73.2226	58.9882
21	17.4216	15.8112	11.3187	32.1579	22.257	17.0608	24.5204	23.9667	12.2902		32.6049	31.6345	31.6573	32.452	12.7973	37.0906	27.6208	27.9601	21.0544	24.7029	25.9495	20.8876		66.8159	54.7263	51.1393	50.4588	70.2703	75.2974	64.233	78.8868	77.3881	58.4811
21.5	16.6121	15.2991	11.4564	30.0417	21.3642	16.0801	25.868	20.9701	10.8186		35.7065	33.4483	30.6085	28.9791	12.138	31.1871	30.0056	29.2259	21.909	27.9874	27.2889	22.0563		60.5321	53.1361	48.9139	49.0919	68.0533	75.3688	62.6395	77.4394	68.7381	59.5846
22	15.8109	16.2744	11.2982	26.8451	22.5089	17.3883	26.8276	24.003	10.61		29.7619	32.4135	30.0441	29.8428	13.2622	30.3146	31.2611	29.6333	23.8387	25.1145	25.3987	21.516		63.346	55.9644	56.8239	51.4138	72.7198	80.011	58.862	77.6572	67.3825	65.8036
22.5	11.3212	17.7687	10.6622	31.3622	23.1152	18.8441	26.7679	21.3205	12.1527		32.2568	31.9836	29.3449	34.3749	9.16938	40.9319	30.9974	30.6622	23.2589	26.7345	25.1385	19.6938		68.4948	54.1595	54.4698	53.6659	68.0131	77.4686	60.9328	73.6368	69.0655	57.8945
23	12.3066	17.4206	11.4032	24.505	23.8524	20.1004	25.8116	21.5993	11.2376		33.5549	31.032	33.0355	29.9425	15.0686	37.6321	28.2607	29.7879	22.7716	24.2983	25.8598	22.6065		78.0023	68.4766	58.8739	51.0892	69.6497	86.9145	67.5023	69.8784	77.4532	74.6481
23.5	15.3425	17.4791	11.5938	28.3114	22.7356	17.3663	24.2494	22.1784	12.5055		33.9871	31.7336	28.4006	29.7404	11.1453	29.7792	27.1259	26.5828	23.7863	24.9906	27.8073	21.2463		78.9376	60.1086	55.0272	58.7677	68.6944	84.1324	74.8151	76.2413	77.4534	72.1785
24	11.5016	17.4706	11.2973	27.3667	25.9551	18.7171	22.4062	23.8598	12.2581		28.0132	30.831	26.4032	34.6983	12.6399	41.6752	28.8711	32.0415	22.6059	24.0198	29.4633	20.2737		70.2797	60.3145	54.2428	51.5403	75.3641	85.4724	65.9293	86.2821	81.3123	76.8103
24.5	14.0783	15.2325	11.9337	28.5713	24.6506	16.7216	25.4919	24.8853	14.0186		29.5873	36.9417	28.7006	33.6888	12.5989	40.1629	27.5021	33.2934	25.2218	23.322	34.8715	20.8809		68.607	63.4515	54.1426	48.0691	78.3238	82.5543	70.0862	81.7766	77.881	76.838
25	12.9665	17.6029	9.27755	32.6546	26.1549	19.0646	26.5966	24.1175	12.6116		32.1957	32.7615	30.5553	33.3409	11.5359	39.0784	29.0147	31.3504	24.9386	24.9028	31.3159	21.3335		64.1676	69.2744	49.1737	49.9731	75.9374	74.4425	73.189	88.4585	79.3447	50.6527
25.5	14.5596	17.9178	12.6897	34.8775	25.6054	17.9174	25.8305	23.5831	11.3524		33.3261	35.9446	28.5514	35.1343	12.2246	40.7416	30.455	25.6906	26.2312	26.8435	26.8766	20.7467		70.0451	67.2223	44.9869	48.4773	82.9392	82.4487	61.3216	78.4837	80.532	51.0506
26	18.0802	18.2495	10.3973	32.7568	26.521	17.8686	25.7965	25.7992	11.4268		32.2728	33.0218	30.5838	37.1777	13.2607	39.3334	31.8076	27.8303	25.0241	24.3474	27.0097	20.6839		75.0692	61.0935	53.3727	44.8188	70.9159	78.6082	65.7886	79.0555	88.547	60.901
26.5	12.7959	17.3436	12.5854	31.7993	24.8618	18.8508	26.6163	26.2689	13.4247		34.0301	31.3636	28.138	34.8717	13.1616	32.8719	29.5691	25.517	23.3925	28.9326	28.2049	23.3368		71.0829	66.3888	47.2802	49.5437	75.5913	73.5467	65.6487	73.4048	81.5006	51.7855
27	15.6378	16.6047	12.6952	32.2987	24.8323	18.3658	25.0312	24.6094	14.1449		34.7963	39.1829	32.442	33.1283	13.5396	32.4353	34.0322	30.3805	24.707	24.7296	28.3415	22.0236		68.7369	64.3179	43.0433	49.0075	76.8248	83.0575	65.173	81.9806	81.3135	53.096
27.5	19.5322	17.1681	13.2566	32.8774	24.6707	17.368	23.9124	23.5501	14.3704		36.9863	34.2072	33.7507	33.994	14.3871	34.2397	31.7331	29.5971	25.4764	26.3773	24.2748	19.8222		66.5116	66.813	46.9322	45.2058	90.0429	86.4823	68.9354	80.0693	90.2353	65.6632
28	13.8069	16.5497	11.0974	34.4481	26.759	16.365	29.8446	24.345	14.2916		34.4657	41.7967	32.6898	30.7087	14.6679	39.3053	33.9313	32.6256	23.991	27.3182	26.2717	20.0214		71.6882	55.1151	49.5976	49.2225	80.7811	84.3705	66.8178	78.607	84.6959	70.4149
28.5	16.729	18.3034	11.4111	35.6532	25.8432	19.3298	28.3008	25.267	14.7532		36.191	35.1793	33.1436	32.5023	15.104	34.525	32.8741	29.1314	24.6541	26.2603	30.8712	19.012		72.4361	59.3516	53.658	49.8336	77.6447	77.4857	59.6856	79.5463	86.3076	71.565
29	18.59	16.7791	10.8103	34.3631	26.4172	18.0805	25.8319	23.4299	16.0007		37.2365	33.8215	35.1586	33.3954	16.8702	40.4766	31.3214	28.1034	24.8374	30.1821	29.8936	19.686		67.7538	70.7303	50.5425	42.1518	81.5658	81.3658	67.2113	83.1867	81.0737	59.5016
29.5	17.3284	19.4379	10.7469	33.9257	29.0644	16.725	27.1907	26.3287	14.8044		35.0732	37.4123	36.5886	34.0841	13.8408	33.3088	28.5687	29.8047	24.5891	26.3439	30.9666	22.5915		68.7412	56.9774	48.8991	51.4574	79.975	82.1534	70.1636	80.4951	82.9852	74.0384
30	19.7301	19.3797	12.2982	34.4477	27.14	19.6917	27.8627	26.5021	13.3853		37.4299	35.1083	37.4369	33.3509	15.2598	42.6401	28.0093	30.7393	25.6528	25.3267	24.3241	23.2666		70.0044	65.8125	42.7243	48.3364	87.9602	74.7938	69.3727	71.4173	84.74	70.013
30.5	17.6357	17.9795	11.7828	32.8686	25.7521	18.8464	28.0602	27.6524	16.2205		39.2275	34.67	39.2849	34.817	14.6072	44.655	32.2149	28.0929	24.6814	28.1705	28.0384	25.1944		70.0859	65.5323	45.9744	56.0464	80.0256	77.8318	64.2745	82.406	84.9122	71.4531
31	14.2855	18.7523	11.2276	34.8966	28.3484	19.6828	27.7743	27.0475	14.6887		38.7833	38.4348	37.4175	37.0506	14.5881	38.479	32.0025	29.775	25.0482	27.1854	30.6142	23.244		78.3614	69.8673	43.5241	53.6639	83.2859	77.7528	64.2296	78.3184	85.2297	75.0774
31.5	17.1922	19.3033	11.4014	33.5516	28.0996	19.6707	25.4416	28.2875	15.1137		34.5922	39.642	34.0913	39.2835	16.0931	46.0832	30.202	31.4948	26.7734	28.8391	29.0488	23.0889		78.4606	60.3618	47.5333	50.6265	73.9109	82.9695	71.6788	75.1299	86.3941	75.3679
32	21.7683	19.4253	11.1133	28.2216	27.8547	20.7964	28.08	27.5202	14.3714		37.3563	39.2585	38.8115	35.792	14.5543	34.539	30.5654	34.1388	25.4234	26.9642	33.8319	24.4192		67.6557	65.0713	48.6022	53.6756	84.2189	82.8556	72.9115	77.314	89.0775	81.8226
32.5	16.4306	20.363	13.2045	35.7695	27.7644	19.6647	26.4849	24.3276	14.4106		39.2179	33.4326	33.7498	37.5884	16.5606	41.6439	29.1048	30.66	29.6844	28.6339	31.4696	21.7663		71.8652	63.3116	52.2264	48.4207	83.7507	88.2889	70.1222	71.2237	96.5864	88.1766
33	20.2833	20.3833	11.2029	34.9998	28.973	18.7724	27.2196	25.8104	14.0037		37.6002	38.7292	39.5249	36.5203		37.5568	30.8686	33.0002	28.0767	30.8881	35.7892	23.0876		71.7199	58.9186	50.5461	51.1395	72.4781	80.9475	78.2428	83.1137	90.4711	80.9619
33.5	15.7023	18.9038	11.7495	35.6565	28.4524	18.8363	26.5009	26.2751	13.695		34.1707	35.9783	32.539	39.0559	16.0059	43.007	28.3811	31.2162	27.0644	27.4916	30.581	22.3715		78.2304	57.9538	49.6258	48.5305	82.9202	76.7288	70.6856	81.5558	86.2531	82.6452
34	15.4657	18.3302	13.0876	31.8678	27.4257	18.6263	28.5573	27.1065	13.5274		36.0085	36.2574	34.586	39.5446	15.5286	37.9599	32.1435	31.0018	26.6322	31.8698	33.1297	22.788		83.7397	67.1999	47.7571	53.3225	88.0988	72.8309	61.7976	76.8779	86.3038	74.7278
34.5	19.6544	21.3795	13.1595	33.6075	26.7189	18.9275	29.7528	26.5041	16.3755		39.645	40.4847	35.1214	40.7297	16.7771	46.8027	29.5715	29.0618	27.2899	28.456	34.0017	22.6228		85.6802	68.6659	48.3561	49.6175	92.5323	82.2527	68.148	72.8627	87.1245	74.4173
35	17.9339	19.4758	13.0928	33.8154	29.3831	19.7463	26.6628	29.2817	15.1781		40.0193	37.0181	34.891	35.5591	15.911	42.7783	26.1146	31.6097	28.5679	33.3058	32.5247	27.8889		90.561	68.7634	50.318	51.362	84.7446	86.9355	72.6874	75.8264	76.4546	50.1267
35.5	14.7613	21.0711	14.6687		28.3704	19.5279	29.5251	25.6867	16.7249		38.1629	36.8498	31.7947	40.8273	16.1318	37.7027	27.3708	28.9346	27.2662	27.6351	34.8023	29.0227		81.1627	68.5437	53.3952	51.0789	82.1657	85.1854	67.1354	79.088	91.5964	46.1182
36	15.2744	20.3889	13.7778		29.0966	20.1281	29.6736	27.8174	16.9437		36.7537	39.1238	36.1003	40.2701	14.2272	50.7664	32.6641	30.7715	26.8926	28.8558	31.4531	26.4782		79.2127	65.2261	52.4911	50.1322	89.2716	87.5059	80.0284	70.1486	85.3848	69.0596
36.5	17.1816	21.2979	13.8014		28.495	21.2351	28.2474	29.3814	17.6899		33.4523	40.5711	34.6089	40.3158	16.4166	47.8476	31.1062	30.8827	27.8481	28.8171	34.1761	28.6358		70.9488	61.5482	54.7703	52.387	81.1579	89.2678	65.9265	70.437	86.8536	88.1267
37	17.1639	21.553	11.6241		29.3219	21.046	25.4581	30.6548	16.947		34.5661	37.546	28.8807	40.0135	16.7757	47.9879	29.1929	30.7642	28.7987	31.3305	33.2686	26.5878		83.1379	67.1773	53.8204	53.4122	82.8686	83.0286	70.7578	79.6603	102.73	87.9272
37.5	17.9331	23.3583	11.1231		26.909	21.069	23.1644	29.1015	15.7132		31.7907	39.5618	28.6963	39.1282	17.2388	46.7577	32.8175	32.3082	27.9191	31.3166	34.7564	24.1392		73.5954	70.5915	50.8743	56.0725	81.0222	84.8772	74.3462	71.0695	102.476	85.4478
38	20.0164	21.5792	12.7116		27.1738	19.9417	25.6127	31.1348	15.9172		38.4952	41.5057	31.913	40.4386	15.0786	43.9625	32.5217	33.3907	29.742	31.9835	35.6215	25.687		76.5577	54.8975	48.9568	47.6644	74.3014	78.3313	70.9854	82.6614	100.795	89.0127
38.5	20.3503	21.2765	14.4814		29.809	20.9529	29.8729	28.7287	16.8183		37.6084	42.3074	36.2664	41.9609	15.9905	43.9668	34.3001	33.7123	28.3783	33.5662	33.6931	26.9662		77.0206	81.2053	54.7748	50.1154	78.9496	84.1854	68.6272	74.5179	106.905	82.0383
39	18.8179	20.2243	11.7987		30.7736	22.2612	29.2836	29.1775	16.2606		36.3442	41.2256	34.3217	41.6193	16.3141	48.2901	33.9798	31.3979	28.5233	31.9792	35.737	30.6948		82.6005	73.5193	55.0272	49.7537	79.47	93.0633	62.2473	77.1388	94.2219	85.1359
39.5	17.6608	22.8752	12.7136		32.6757	20.7341	29.2274	29.7715	16.2158		37.1546	39.0196	29.319	41.9235	18.7493	41.2278	29.3746	33.9755	31.6005	31.5551	34.9737	28.2861		75.787	67.1402	51.8288	47.9736	81.1013	93.9901	58.2831	80.059	96.275	73.9062
40	17.8071	21.4602	13.7606		30.2176	21.3143	29.2904	28.8373	16.9345		39.7563	36.3529	32.7098	36.8598	18.7385	37.4232	33.7274	33.2662	26.4733	30.194	35.9107	27.6966		72.7029	69.8047	49.9008	52.5654	92.1432	91.6897	66.7469	81.365	100.984	75.1639
40.5	17.233	21.4529	12.9576		28.1492	20.7689	29.2793	28.9468	17.2588		37.7415	41.3847	35.9395	38.3218	17.024	40.5635	31.992	36.3054	29.5284	29.3454	39.339	27.1744		74.5232	71.247	54.3149	51.2967	93.4272	88.4517	63.8218	81.2716	98.5307	60.1142
41	16.4276	22.6348	13.3352		28.4955	20.4627	32.2311	28.3043	15.4628		33.2964	41.4428	29.7653	36.485	16.1808	47.5543	34.3968	30.5656	34.283	29.7954	37.8816	29.5804		88.7329	60.6679	48.5811	49.8072	106.321	84.924	67.8392	85.4217	95.564	71.2065
41.5	13.3188	22.2781	15.1262		28.5752	21.1994	26.6592	31.4319	16.2877		39.4108	40.4455	36.0638	39.6753	16.2284	44.6269	32.0555	34.3516	31.0871	32.9317	41.1227	29.2305		82.5421	67.3184	56.3657	52.8494	88.4454	86.1563	66.7771	86.676	102.305	72.923
42	21.5127	20.8345	15.2646		31.6439	20.7159	28.2858	31.2743	16.7803		36.3371	40.291	35.9999	42.4873	16.6461	43.6485	32.4519	33.4279	33.6907	32.0902	37.4133	22.6048		82.6526	64.6469	57.7314	57.5503	88.4011	88.9698	74.4047	86.7112	101.719	70.1675
42.5	21.6161	22.5332	14.95		31.7151	22.0619	29.6966	26.8444	16.9825		39.0284	47.0921	35.032	38.0324	16.7563	45.5659	33.8899	33.2852	32.9774	31.1995	39.9231	25.8257		80.436	62.9054	56.8687	61.0492	90.4274	91.4559	64.9245	86.1651	102.421	84.3732
43	20.1035	23.0781	12.6727		30.0927	21.6536	28.933	26.6657	15.6121		37.9267	42.615	38.2492	40.3779	16.4177	42.1342	36.8777	34.5937	32.42	28.5653	38.1823	25.3652		81.7106	72.543	55.9767	50.3114	86.8174	82.3092	62.1745	87.3799	105.463	83.316
43.5	18.4019	21.5468	16.6672		31.5767	22.8941	29.4971	27.4456	16.9866		39.0885	43.2132	37.0892	38.7421	16.5749	42.6445	32.3466	34.1205	31.1243	31.7742	38.797	29.8839		96.5109	65.429	56.0209	60.5349	91.5101	79.3281	63.8041	87.4691	96.567	80.1574
44	19.0655	23.8602	12.3529		29.1702	21.504	28.4154	27.8306	16.9638		36.0907	38.0491	38.6021	35.6963	17.0053	45.9125	32.996	33.3785	32.806	31.5785	35.3379	25.2887		96.3425	67.8545	61.8116	61.438	96.4413	84.8028	60.5417	85.6089	93.9041	93.2051
44.5	19.368	25.3971	15.6293		31.3319	22.2882	26.9472	30.8564	16.7591		38.1224	38.8827	33.4906	40.4517	17.287	44.2674	34.7282	34.395	30.7613	31.7931	37.332	26.9691		93.2714	58.6778	55.2719	59.6768	87.0577	87.5225	62.3047	84.7108	96.1243	81.423
45	17.92	26.6525	15.3362		30.1502	21.6493	26.7839	29.6981	16.003		42.6924	43.2728	36.9434	40.7939	14.6192	43.8794	33.7869	37.4509	30.2368	30.463	40.0742	26.5568		93.049	63.3267	62.2548	58.1486	89.041	79.7066	62.3795	89.6585	96.5944	69.9004
45.5	19.4854	24.2386	14.6122		27.2015	22.3985	26.9905	30.2699	17.2696		44.0345	47.4751	38.3735	41.9184	16.27	48.1182	34.109	33.021	32.3004	32.1664	33.5473	30.3026		88.9339	57.0458	64.6571		86.5834	92.3859	65.8653	89.5054	94.0501	85.0741
46	16.3543	22.8731	14.4627		31.3847	20.9652	30.9691	31.2279	16.5778		44.4939	46.51	32.6573	38.4574	15.3648	47.618	35.1638	35.148	32.487	33.6084	37.0419	30.723		82.3216	65.3558	63.8429		83.3316	91.0882	63.4832	83.7918	94.2975	76.8125
46.5	20.3872	21.9813	14.4467		32.531	22.3974	29.7381	32.4546	15.0819		38.2248	39.543	32.0207	42.252	15.4588	46.1823	29.924	31.7143	33.6212	32.1215	37.9344	28.8473		84.5772	58.7225	62.4259		87.3125	94.1622	75.5449	91.8662	96.1049	72.8268
47	19.5048	21.454	12.9969		31.6095	22.8359	30.3597	28.3107	18.5318		41.3849	40.5741	37.441	39.1744	14.0981	49.0291	32.1676	31.9289	35.0375	33.3074	35.9147	24.798		76.9895	58.1456	57.4685		84.6619	89.6808	66.3938	90.8084	84.5686	86.5778
47.5	18.8613	24.0826	14.8686		30.7979	23.5056	28.47	30.6107	17.1868		39.8332	41.5001	35.2095	45.6864	16.5052	51.48	31.7119	36.123	31.5451	30.5233	38.9102	28.9624		75.8383	65.6582	70.7127		87.5915	87.8851	73.3898	87.5449	82.4663	81.8785
48	18.5828	23.7893	14.8423		29.735	23.805	28.7369	29.0935	17.2311		41.6093	44.1837	36.5632	40.4417	14.8901	44.9913	33.9921	33.3591	35.3852	31.1807	35.0821	28.0909		87.433	68.0186	71.4176		79.5262	93.4326	68.702	83.2387	83.6039	88.9821
48.5	19.5604	24.095	14.8093		28.4111	22.7877	28.1634	32.8018	15.7116		42.474	44.5126	39.4456	34.3983	16.0358	51.6168	33.2016	35.4703	32.9478	33.7853	40.6565	28.4123		75.1222	66.2381	75.5193		88.3898	84.0179	73.3476	81.3568	91.0017	84.7514
49	15.7051	23.308	13.4982		31.4356	24.2164	28.0433	30.5843	15.2783		41.3604	41.9151	36.8299	38.1666	14.8605	53.1105	34.6569	32.1031	34.0678	35.1708	35.5859	24.9777		81.9393	62.4548	68.314		76.8177	86.9352	62.7583	87.6131	91.2654	83.8661
49.5	25.7091	24.994	14.2197		30.5493	23.7905	30.035	32.6549	16.1195		38.538	43.3227	36.1131	37.2707	14.23	48.6935	35.9346	35.2002	31.391	33.1008	38.3549	27.7349		74.377	60.1599	65.8592		87.7323	88.7931	75.9266	84.4993	96.6481	82.9965
50	20.5326	21.8048	14.3137		31.3931	25.1609	28.5631	33.859	18.0664		38.5077	44.5212	39.0121	32.8228	14.6639	49.7349	34.519	35.195	34.3333	33.7341	36.3661	29.6227		73.7619	58.0847	66.3809		91.1657	87.5342	77.2027	89.9134	89.6402	87.0251
50.5	21.2196	25.8209	15.7997		32.6091	25.3511	28.6146	30.4358	18.3862		41.2274	44.0056	36.806	35.0511	14.7806	49.5315	36.9106	34.36	34.0552	33.4682	35.6281	30.6587		65.4463	61.6287	74.6951		85.7973	90.6154	75.4446	77.9254	93.7444	75.4785
51	17.5475	25.0987	15.2911		32.2382	23.9273	30.0193	31.2298	18.2529		35.6799	44.845	37.5155	34.1323	15.9697	45.6174	36.2031	36.4404	30.0268	35.0189	31.1369	28.9439		72.5525	50.2221	68.6042		86.3461	89.168	65.5764	85.4333	90.0229	81.1049
51.5	15.8823	24.5474	17.6844		31.9434	24.9295	31.8188	30.5655	18.4801		36.6183	46.6108	37.3686	35.6513	12.3079	49.8602	40.0262	33.6231	33.16	36.6773	32.6635	24.2791		74.9189	50.4131	63.3186		79.2451	90.6902	66.0515	91.6908	91.8564	87.2168
52	22.412	23.4573	16.2659		31.558	25.5803	29.9114	31.3248	18.512		42.3743	46.6712	32.2169	37.0827	13.5155	50.3126	34.2241	29.3273	32.4703	34.6582	40.0149	26.9737		75.0314	50.8298	63.9207		91.0095	83.3407	64.1879	80.0836	102.448	85.37
52.5	17.1141	24.5558	15.4083		32.3315	24.0455	31.1166	29.0005	18.385		42.5899	47.6488	35.6109	38.0478	13.0036	46.9896	35.0489	31.6434	35.1335	35.2912	34.4631	27.4243		83.4789	48.1191	66.5224		84.3217	84.276	81.3587	89.5165	93.7066	65.8595
53	18.1219	25.3687	14.9289		32.2884	23.1795	29.0904	28.5497	19.2254		47.7028	42.9312	33.106	44.2966	13.9204	51.2062	36.8081	29.8752	35.486	34.7311	36.4433	28.2671		83.3302	51.4446	67.3571		82.6591	89.5209	72.1157	93.7345	97.7698	59.799
53.5	18.4216	23.1595	16.2374		35.5024	25.0805			17.8802		41.2686	47.1653	41.9899	42.7514	11.8354	59.8068	33.9711	33.3929	35.6998	34.159	38.0895	29.5682		88.4436	50.9978	66.4826		93.8624	85.2282	71.9538	89.2645	94.1551	74.6598
54	16.1457	23.2696	14.2885		33.5857	25.8517			18.8502		40.2744	45.111	33.9277	44.1501	13.2049	47.4743	36.2561	32.5862	34.7813	34.6254	34.2268	27.7358		96.6136	58.5983	65.5699		90.8312	90.17	68.2184	93.9039	92.1706	81.3321
54.5	20.2829	23.2959	15.2029		36.3561	25.371			19.0882		39.511	44.2376	36.6621	48.1475	13.9452	57.8437	31.6015	30.2141	35.3353	34.2766	40.0687	25.6168		84.1862	55.4438	60.6666		97.3807	87.9557	76.3426	92.8389	89.6194	85.8033
55	20.2736	22.7763	15.9039		33.8348	24.1645			20.0432		44.9383	47.0204	37.5803	43.0683	14.7935	54.2468	34.1443	34.1588	33.9741	34.0849	39.4774	27.2849		84.8484	52.306	59.556		95.2405	88.695	75.3797	84.6118	96.8139	70.6739
55.5	15.1654	21.7872	17.1092		39.048	26.23			19.2924		38.5295	42.3795	37.4887	44.7904	15.7614	58.6757	30.9067	33.4731	35.8838	35.3959	37.6467	22.5563		78.6444	60.6376	62.2854		98.5162	85.5964	61.4004	100.397	94.6894	78.6767
56	18.7209	22.4714	17.8376		34.0808	25.1119			17.9801		38.745	44.4068	34.3779	44.4681	13.7649	45.5626	37.1589	34.8571	36.3792	35.1768	41.01	23.9925		85.5233	62.4158	71.5536		89.8418	80.8731	64.8263	102.084	89.3668	89.2173
56.5	18.2134	22.3256	16.0183		36.7987	25.7061			19.1567		42.6211	51.2552	32.4963	46.3127	16.555	48.4442	34.8017	34.186	34.2139	33.9042	37.568	27.4524		92.3406	54.7988	66.6211		93.1607	88.4255	72.5421	106.453	101.184	85.0248
57	18.2432	24.6941	16.7816		36.0776	25.48			18.6979		41.5057	46.3624	34.1872	47.3493	13.1356	52.8462	38.163	32.7696	36.4254	31.4475	35.3175	31.4		79.0668	59.9212	62.4918		92.2463	92.0107	70.8373	97.9705	104.552	90.3298
57.5	18.725	24.5514	16.064		34.2535	25.8913			18.2929		38.3045	48.6892	34.8041	45.5054	15.7998	56.7278	38.4067	31.8184	34.5506	34.3014	36.2748	26.632		83.3993	57.205	61.4821		91.0434	97.2734	77.948	92.3676	95.2429	74.0762
58	17.594	23.6715	17.416		34.9305	24.2156			19.6202		39.3665	45.9686	39.0971	44.3343	13.8703	54.0482	38.2849	33.9296	33.881	34.887	35.5308	28.2392		83.3159	58.6146	70.5867		93.0822	93.4133	78.0871	107.248	100.251	75.9818
58.5	22.5814	25.1078	17.3716		33.7249	25.5496			18.7737		37.6174	46.3676	37.3151	44.3476	16.8231	50.7124	41.5504	37.92	35.5966	37.2081	43.3513	25.9003		88.9358	64.064	66.9595		93.8077	93.8371	78.5482	92.1081	85.5312	79.2067
59	12.8849	25.3469	15.6982		33.9415	27.1076			17.1168		39.9856	46.4201	33.2989	42.3706	17.3593	47.9935	39.2869	34.406	35.205	35.8565	39.3543	30.114		80.7403	68.2365	60.8234		99.3929	93.3201	71.6253	102.046	97.881	81.3591
59.5	17.0087	24.3299	16.3263		35.9795	27.1126			18.4481		39.2896	43.847	39.3271	40.1949	15.8933	50.2823	37.8362	37.9094	37.6758	36.0757	40.166	24.9888		84.6743	60.7259	60.3142		99.9	85.7598	69.6812	86.0845	102.766	74.2068
60	20.3833	23.1603	15.705		36.6933	25.9642			19.643		39.6393	44.504	34.6078	44.3845	15.5136	54.7673	37.037	33.4989	37.8918	36.6927	40.3388	29.8253		69.6721	62.8225	72.235		97.8132	91.0999	63.7148	109.462	93.6462	79.2426
60.5	19.3986	24.6764	16.6048		35.4541	25.6053			19.7217		37.9995	46.3752	35.396	45.8239	11.3355	53.8246	37.465	30.0772	36.6034	36.9663	37.3884	33.5804		76.9195	58.362	64.6706		92.2689	91.6972	73.1932	108.272	90.4536	87.1496
61	20.1969	23.5422	15.7306		35.4479	25.7079			17.4615		38.1659	49.3936	38.8774	44.3137	14.5364	53.5371	36.4256	34.6096	41.4391	38.0008	39.4264	26.6913		76.208	60.4894	61.296		106.927	93.7068	79.4941	106.296	95.6901	89.8744
61.5	19.6063	25.3563	17.5404		36.2819	24.9423			19.3488		38.4237	47.0412	36.0475	44.691	14.9701	53.4297	38.0256	31.1825	39.9162	34.9599	39.0114	26.7919		86.8722	61.5848	66.7317		101.278	97.5461	80.8329	100.425	93.0498	96.3502
62	16.8819	22.3497	16.5515		36.9557	26.1355			18.2219		35.5914	44.1561	38.8953	40.7014	13.7578	58.5351	35.7544	34.0255	39.2872	36.4972	38.8534	31.2447		80.8057	64.8219	63.821		91.8462	95.4348	62.0192	103.128	92.6982	100.722
62.5	19.5496	24.0712	15.3448		32.2224	23.4259			18.7034		38.5997	50.9423	34.282	42.572	16.2995	52.2446	36.75	33.8081	37.1671	37.1245	35.3361	31.8005		85.1475	61.5833	63.4021		110.953	90.5202	72.9329	96.3595	92.45	87.3295
63	20.1038	23.2425	17.9827		35.5921	25.3575			18.3901		35.681	52.3155	36.9904	42.76	14.2541	54.0806	35.2091	32.2898	37.1751	37.9984	33.4363	30.8597		82.9788	58.6868	69.8147		96.4717	90.946	66.5747	117.391	97.6151	90.7557
63.5	14.3079	22.5861	16.4355		35.716	26.5095			18.9632		37.4748	51.695	36.719	45.2835	16.1471	56.0242	38.9899	35.8139	39.4807	38.0438	33.9838	29.6944		82.5312	60.6589	63.0508		83.9454	89.0074	66.1296	113.372	93.0242	88.8686
64	16.3918	24.2314	16.3033		36.2998	26.7248			20.1725		34.7224	51.299	34.5493	42.4158	14.3441	56.8586	39.6215	35.3232	38.2983	37.0504	36.1968	32.9985		83.6803	57.2755	63.5707		89.0875	90.9991	69.4668	112.399	90.9866	83.3687
64.5	17.8523	24.1821	16.6844		36.4109	25.2077			18.8604		35.1569	54.2599	33.3662	42.9124	13.2076	54.7504	37.4766	32.8864	35.6434	37.7952	40.8561	33.6961		91.3169	57.9228	70.4655		92.0987	89.8458	67.9829	115.163	94.8526	80.7849
65	14.9229	25.278	16.4451		36.8881	26.9983			19.5401		36.4527	49.5125	38.8975	43.3767	15.8745	51.4164	41.5672	35.9933	37.0282	38.469	36.5569	31.8099		93.3794	60.5121	56.3859		96.0203	95.0018	70.0127	110.886	97.8741	96.7011
65.5	14.9047	24.1358	18.4264		34.7251	26.8004			19.8159		33.162	52.2161	35.3599	42.5718	14.8212	51.9047	41.7177	34.9185	37.9214	42.1827	39.5052	32.3567		85.7669	61.2998	65.6285		99.6925	98.3339	62.6313	99.4423	94.6853	90.0264
66	16.8075	23.8417	16.6541		38.2545	25.2326			20.0822		39.3102	48.0432	34.6555	47.7112	15.579	53.0967	39.3954	31.8866	35.2838	38.1242	39.5837	32.4165		90.8982	57.6325	57.7869		103.09	98.1416	69.2333	102.248	100.154	96.7177
66.5	16.2495	24.7753	17.7725		38.6837	25.4999			19.0331		40.7641	55.392	34.039	46.8522	16.5251	52.4063	39.3382	34.6827	36.0967	40.3056	39.1495	29.274		88.9325	55.0434	59.7669		103.27	93.9409	67.2088	105.898	98.5833	82.8672
67	21.4181	22.8543	17.9874		36.6206	26.0441			19.2747		38.9236	50.4445	29.8894	43.5033	16.0104	54.7865	44.0154	36.9028	37.4466	39.8933	39.8415	29.0566		93.4245	53.5738	64.2649		106.535	95.4977	67.8176	107.028	97.3764	80.053
67.5	16.9794	23.9621	19.233		34.7742	27.3361			17.8483		44.3365	48.334	33.6062	46.4009	16.9534	46.1655	40.1496	34.4092	36.4056	39.2811	35.0878	34.5887		80.3424	54.2788	62.6226		101.064	99.725	63.2305	113.369	98.6603	85.2889
68	19.8042	21.7882	18.6584		34.3972	25.2504			19.2441		45.7437	51.3554	35.3632	45.5739	15.2078	53.2755	42.1827	35.2775	40.5043	39.2893	35.8378	33.0696		89.4013	52.6501	66.2701		95.2892	101.393	67.1159	95.9737	99.5455	94.9275
68.5	23.7947	23.434	19.2146		36.2064	24.5246			19.5864		42.0438	51.2234	36.4385	41.0859	15.0356	54.7887	43.3657	34.4839	36.6684	37.0387	36.7878	30.3328		88.552	64.1304	60.5148		97.2099	95.3954	57.8	102.973	98.4832	87.5053
69	22.3662	22.9247	20.0585		37.1016	25.7616			18.8801		42.3212	49.9902	40.2976	44.5233	15.9786	53.8682	42.0773	35.0868	39.5855	39.736	38.0429	32.4452		89.236	66.6745	65.2434		106.514	93.7224	62.4941	89.3563	102.514	86.6133
69.5	25.6107	23.0358	17.7413		34.7449	27.2033			17.9917		44.9372	54.0197	41.7178	46.7039	16.1224	52.7332	41.6121	33.7279	39.5334	36.5084	40.3514	31.5925		83.7223	63.3939	62.5881		98.9724	102.078	81.5631	105.99	100.649	86.4015
70	22.7886	25.7999	16.5942		37.5814	26.4598			18.9613		45.6745	53.0782	36.2572	47.4784	17.5441	50.8493	43.7208	36.3922	39.6411	39.29	42.3649	35.9286		91.3768	71.3665	60.5659		97.7202	102.751	64.2084	116.256	98.6059	84.5382
70.5	20.2627	22.9764	17.783		35.4637	26.5359			18.7269		43.1469	53.1679	37.7223	45.5755	16.8578	63.1559	44.6556	37.1259	38.6082	37.478	39.4608	33.6128		77.4746	66.3614	69.5411		99.5806	97.3588	61.2007	113.659	105.869	84.2405
71	23.7906	25.1855	17.2472		35.8687	26.1201			19.7039		36.7753	55.7948	35.9173	45.0963	17.0057	59.9015	41.5258	38.3235	39.3155	39.8503	43.903	33.2226		86.6592	63.7396	64.575		84.8945	105.179	63.7544	103.923	105.346	79.6517
71.5	20.9109	20.7602	17.7618		35.3407	26.7688			20.2427		42.2561	56.5992	37.674	40.9163	16.6429	51.9524	40.155	31.7458	39.7851	38.8216	47.571	35.0311		82.1279	66.2613	67.008		84.4193	96.034	66.3916	99.8705	110.153	84.3435
72	26.0857	23.7582	20.7747		36.7667	26.1067			20.8256		37.5145	53.7727	39.8808	41.649	17.2593	51.329	43.7525	35.7148	40.3396	39.0451	42.5372	30.7337		89.8929	70.9266	64.5043		92.2607	92.2979	57.7871	103.661	119.202	86.4006
72.5	23.3897	21.6595	20.2353		39.2682	26.5578			19.1576		40.8116	52.8383	37.2683	43.1407	17.2845	51.4286	41.4607	36.3049	42.0326	38.6372	40.0096	32.9347		88.004	70.8976	64.0113		91.9947	89.3101	56.3411	106.119	111.733	91.2946
73	20.2533	23.4651	19.4098		38.1236	26.8943			19.5985		46.7493	50.5729	35.0704	36.0087	16.6261	60.7715	43.692	36.809	39.5026	38.8371	41.522	34.3665		83.6273	67.73	63.8996		94.1381	94.5653	60.6036	104.45	97.1993	87.9499
73.5	19.9998	24.1352	19.1324		36.4941	26.9211			18.8961		43.1681	56.6689	41.2505	39.3166	16.8965	51.1459	40.9883	38.1532	38.5888	38.3912	43.4697	37.5449		88.1281	65.485	60.0289		86.002	94.6881	62.6228	95.9511	112.614	81.5986
74	23.1773	22.0556	20.083		37.1141	27.5377			19.4007		37.8307	56.7934	31.4795	38.6239	15.1228	56.9668	37.8118	37.4115	39.1386	38.4695	41.2511	38.4941		95.3181	66.5863	69.6105		82.6665	93.9286	61.1026	101.004	98.1153	82.5001
74.5	18.0004	24.0627	17.4289		40.4253	27.1791			21.0381		42.3628	59.7516	31.889	39.4954	15.2703	59.3624	40.1529	35.0306	39.6003	36.841	38.3025	31.8686		92.3908	61.4574	67.6782		86.4227	93.7953	53.5672	96.2654	95.1308	74.543
75	16.9979	24.0321	19.7768		35.0347	25.6528			19.2963		40.0912	55.9966	30.3521	41.3268	15.2702	53.298	39.2718	38.114	38.7126	37.1363	47.0536	38.8975		87.3237	71.5027	60.4521		83.5377	97.6194	67.3452	92.2839	96.4074	82.6515
75.5	19.0346	24.5019	19.1781		35.0955	28.0322			18.9857		47.0945	51.7372	41.892	35.5329	16.99	49.4059	39.4047	37.4713	42.5164	34.8992	44.0458	38.063		81.5627	77.9617	57.1921		86.1069	98.732	69.4786	97.9131	89.8661	81.3722
76	17.5103	25.0286	19.9141		37.4924	28.973			19.8654		50.2161	55.4666	39.8444	43.6968	18.0462	59.8711	44.6356	36.8853	40.4468	37.3411	43.4992	36.8661		85.2717	78.5221	67.6169		79.3919	93.2754	59.1547	101.582	98.2372	81.8317
76.5	21.9708	23.8023	21.008		37.2207	29.2425			19.1865		45.321	56.6114	33.3412	41.7878	17.5099	57.8619	41.7857	33.8679	42.948	38.3169	44.4922	36.5459		83.8426	60.9135	60.3113		81.6925	97.7435	65.1548	109.818	98.8332	86.0998
77	18.3254	25.2368	17.0676		37.0964	27.6621			20.9966		50.1745	56.1527	35.6409	44.7637	16.626	60.6339	38.0146	33.714	41.8953	39.1181	52.751	35.8201		86.5236	69.5007	59.7398		82.6902	98.3793	71.718	109.296	99.0462	78.909
77.5	17.009	25.5022	18.4848		37.0126	27.3878			19.9793		45.994	52.6142	36.8008	43.441	16.6178	57.3418	42.4333	37.6693	40.4207	36.5423	47.9261	34.1741		80.8947	73.5694	64.8728		100.007	97.8505	72.317	92.7469	105.549	80.4363
78	23.905	25.8603	19.3628		40.2751	28.3647			21.5684		44.5399	53.0855	30.808	43.9979	17.5054	56.6408	40.1621	31.1582	41.1485	36.4679	47.6036	32.3818		86.6151	78.8839	65.0611		90.5886	99.4834	67.1354	97.5108	114.072	81.4158
78.5	18.9214	24.232	18.9331		36.7943	27.5709			18.9708		45.2165	50.1722	37.3834	48.066	16.4635	67.7036	43.7463	35.1974	40.3784	37.9399	43.9702	37.718		87.6122	70.2617	58.516		85.6037	97.4335	69.1291	94.8732	102.462	83.0074
79	16.6819	22.2578	20.4868		36.5489	28.7741			17.9626		37.3231	52.4351	39.2833	44.5583	17.6812	55.9299	44.6261	39.0569	41.0367	38.0993	42.0713	34.6458		83.8521	78.5693	62.0391		96.4518	96.9579	65.0409	110.13	104.76	84.5656
79.5	19.9267	24.2677	19.7696		38.8164	27.9708			19.7152		43.4943	51.3626	36.9323	43.9252	16.0084	61.7234	46.3653	34.9362	40.7616	36.7214	47.889	35.1896		78.3267	86.3165	58.7237		87.9118	99.1817	70.295	121.004	106.68	84.6594
80	20.2722	26.9433	21.4189		41.921	28.2065			20.1577		48.422	45.7363	33.6263	44.7604	19.8761	56.9668	40.3775	34.5353	40.895	37.1496	40.325	34.9565		79.5772		65.2386		83.6025	90.9884	80.5414	106.55	97.998
80.5	22.94	24.6197	19.9271			26.4299			19.0335		44.6149	55.8837	36.7045	42.5197	17.7103	59.0117	40.0528	31.403	41.2995	34.54	39.7818	30.7231		86.5781		62.1549		87.3062	92.2511	65.1681	107.907	99.3286
81	20.1038	28.2101	17.4286			25.9544			20.8341		49.1042	52.9266	36.345	43.963	17.6707	66.7201	42.9023	30.5729	43.0076	36.0488	37.2033	35.5672		81.6643		58.9121		86.002	97.5318	61.407	101.599	110.715	84.6287
81.5	19.4193	25.1486	19.5953			27.7635			20.1356		41.7159	53.8486	36.2187	44.7375	16.8231	59.7649	40.6583	35.4073	40.9676	36.1912	43.6887	33.6516		83.8474		61.2426		83.762	93.3813	70.5012	108.587	106.302	83.3827
82	23.7198	28.1274	18.5501			28.1894			20.1789		44.5278	55.2772	31.7822	44.5907	16.4313	63.6312	42.1838	37.2233	41.24	37.038	47.2319	30.1817		94.7604		61.0402		82.0186	100.567	46.4052	113.132	102.07	80.5993
82.5	20.1486	23.7884	18.5202			27.6928			19.1748		39.8272	53.9965	38.4056	47.3647	18.6364	62.0273	37.8802	37.2062	40.6757	37.8539	42.1956	40.351		91.2832		62.3156		82.7118	100.847	48.3924	117.503	101.186	81.1227
83	22.779	24.726	18.2615			28.2766			19.0915		46.8775	49.545	42.6227	44.9241	18.7247	67.7358	41.5874	35.3879	39.8643	39.9834	44.8764	38.1269		87.4537		64.6527		88.7718	100.859	48.0486	104.457	89.5914	92.842
83.5	20.875	26.7908	17.9818			28.5593			18.8321		39.9836	47.4958	35.1197	42.7466	18.7154	59.5114	41.3895	32.4005	40.644	40.1111	46.0323	36.3586		77.743		53.4769		91.7697	98.678	55.5408	119.605	93.2178	80.5388
84	21.4451	26.747	22.6317			27.2401			22.1597		46.6752	51.2986	34.1537	46.0153	15.8271	62.4423	44.6553	35.8584	44.0432	39.9323	49.7428	37.3851		87.7588		56.4361		92.3807	98.199	55.6247	110	100.437	76.8015
84.5	23.0817	25.5982	20.5078			27.872			19.5681		48.9847	53.9563	39.0468	44.8722	17.8307	60.8823	43.2961	33.8063	39.2854	38.8965	42.295	37.2509		83.288		57.3263		74.0223	92.5419	48.7902	111.385	94.9108	78.3832
85	18.3854	25.646	18.9754			27.5471			18.9177		32.3621	52.8543	40.9892	45.8284	16.3914	56.406	47.8437	34.012	43.2117	39.9104	45.0001	38.0526		85.3035		53.1685		76.1796	99.3169	42.7216	110.49	101.837	79.3101
85.5	25.7101	26.3396	18.2039			28.1814			22.1408		42.1286	54.7533	31.4555	47.6386	15.9611	55.6632	42.6294	36.4446	43.0523	41.6632	43.6296	33.7503		78.5205		51.3185		76.7385	97.5756	62.3578	107.164	98.3721	87.1505
86	21.1461	26.8823	21.3237			27.2054			21.3397		43.3455	54.2962	36.1226	43.1454	18.2916	57.8168	40.6248	37.5332	40.0152	40.4966	44.0016	35.6745		84.0217		57.6375		76.6399	98.7447	53.9145	115.498	105.702	85.5803
86.5	20.7232	28.2579	18.3757			28.0567			20.5227		43.1566	53.0501	35.6519	47.6081	16.9546	57.6722	43.7308	37.5909	45.7807	41.8139	42.8134	36.0478		93.9906		57.2964		81.2806	98.4159	62.0197	106.705	93.7692	81.6541
87	23.4404	25.061	18.5994			27.7416			19.5491		38.6156	52.9666	45.7432	44.0103	16.7499	49.3839	41.5425	38.3498	44.5987	42.3311	39.4796	33.6419		88.4406		52.7718		86.1972	102.752	54.8335	105.561	93.5463	90.9149
87.5	19.1323	26.5707	19.4059			27.7599			23.1069		43.6413	54.6192	39.9061	42.9218	18.0437	58.3802	42.553	41.2757	44.1493	39.7732	44.9199	34.3557		86.8586		58.2949		86.9577	90.0819	58.9979	108.161	96.8665	90.7175
88	23.9852	27.7888	22.5426			28.0703			18.6887		48.4308	52.8789	35.0326	45.7734	17.9132	53.841	45.9273	42.0954	42.1829	37.3829	43.0084	36.1292		86.2394		55.0829		84.6524	100.21	58.8735	104.558	98.5944	84.7956
88.5	26.6215	25.6617	21.7834			29.0058			21.3504		32.4095	58.2434	31.9211	48.3249	16.7117	58.8039	41.835	40.7344	41.5135	38.5727	45.5096	35.1571		80.1902		55.9851		72.0386	94.6851	58.7019	113.422	95.8417	86.0388
89		25.9907	20.1798			30.0928			19.7432		47.3827	54.8095	35.0546	45.0519	20.7759	50.6425	45.9889	37.8891	42.5949	36.5417	47.9587	36.2088		83.3704		54.9662		79.0908	104.281	54.5452	139.219	93.8463	80.8169
89.5		28.0193	23.1127			28.9034			21.2814		52.7487	54.6853	30.5979	44.7673	19.5258	50.4496	44.1041	36.4857	42.9882	37.3839	45.6347	39.1024		85.9153		56.5676		89.5293	102.024	61.3095	121.577	99.5602	89.047
90		28.5296	21.9065			28.5111			20.1115		40.6651	52.3498	34.7883	45.4495	20.3473	53.39	47.3515	39.9466	45.1146	36.8638	45.37	35.4752		76.765		58.1126		80.5942	99.3719	55.9516	116.572	102.021	90.068
90.5		25.4979	19.2704			29.742			19.7		46.4864	50.0913	29.8831	48.077	18.1375	54.6314	40.7847	37.4283	41.9065	42.4545	45.0268	36.8717		87.0578		53.387		75.4691	94.2112	56.8477	128.139	96.8472	95.0463
91		25.9647	19.5526			28.1354			21.4662		39.4775	54.4228	37.0616	49.7123	18.5801	46.4663	41.9843	36.6799	43.1206	39.9307	40.801	37.5272		70.9003		58.4038		84.5486	91.2672	54.0073	113.186	91.7175	94.1657
91.5		28.4617	20.5181			29.43			21.3809		50.3483	56.0549	36.1825	47.4695	19.7203	56.0153	44.4857	40.4238	43.7581	41.0895	37.9072	37.6955		81.1553		58.6682		83.5312	94.8916	57.2613	111.104	99.6248	82.0131
92		28.4617	23.1005			28.5976			20.9787		43.8102	56.7081	34.7375	44.9528	16.5535	61.7859	47.5697	38.504	42.9573	40.9382	44.8734	34.704		87.5938		60.5023		91.8772	94.2611	55.4777	119.751	99.5846	87.7549
92.5			19.2886			30.1926			22.4604		47.7284	55.801	27.3768	45.9626	19.0858	58.3819	44.8654	39.5154	45.5341	40.6205	42.7623	41.7359		84.7536		62.3566		80.0572	98.4345	45.9786	124.694	93.4271	97.2683
93			20.7511			29.4655			20.4932		48.8604		33.3981	46.6503					44.1281	40.3896	45.8109	35.3274		83.7265		59.3866		83.2616	87.9858	58.1752	120.082	102.796	101.074
93.5						31.074			21.5456		48.2995		41.3362	49.13					41.6967	42.9382	44.552	37.8395		82.3692		65.4107		88.3954	91.8631	53.2572	112.539	103.626	99.3657
94			20.3038			33.0309			21.7536		51.3237		30.1886	45.0921					45.8942		40.5824	37.0162				58.9096		81.2863			116.094
94.5			21.3228			29.53			21.5564		51.9844		39.7351	45.9243					45.9977			35.2851				58.8627		83.1899			107.173
95			21.7555			28.8477					46.3936		35.2568	45.408								34.5054
95.5			22.3773			29.4881
96
96
96
96
96
96

## Sheet: Figure 3J
unc-119::gfp immobile fraction
	wild type	unc-33(mn407)	unc-44(hrt2)
	80.1604	57.7781	15.716
	75.3732	48.9279	37.5847
	81.5722	63.9855	37.7538
	64.1361	56.2327	10.3651
	73.0132	83.7605	5.51685
	70.1237	44.929	35.4457
	69.2907	59.6343	-4.9093
	80.4038	64.7353	1.5952
		60.638	17.3064
		62.3407
		59.0441
		67.1157

## Sheet: Figure 3M
retrograde EBP-2 growth events in the PVD anterior dendrite (%)
	wild-type	unc-33(mn407)	unc-33(mn407); UNC-33L::GFP	unc-33(mn407); UNC-33M::GFP	unc-33(mn407); UNC-33S::GFP
w1	100	50	100	0	10
w2	100	40	100	0	0
w3	100	15.3846	88.8889	28.5714	0
w4	100	22.2222	100	0	16.6667
w5	100	10.5263	100	50	36.3636
w6	100	0	88.2353	0	0
w7	100	0	100	0	0
w8	100	33.3333	88.8889	42.8571	9.09091
w9			100	0	0
w10			100	0	64.7059
w11				50
w12				50
w13

## Sheet: Figure 3O
		UNC-33L::GFP																	UNC-33M:GFP												UNC-33S::GFP
time(s)		w1	w2	w3	w4	w5	w6	w7	w8	w9	w10	w11	w12	w13	w14	w15	w16		w1	w2	w3	w4	w5	w6	w7	w8	w9	w10	w11		w1	w2	w3	w4	w5	w6	w7	w8	w9	w10
0		0	0	0	0	0	0	0	0	0	0	0	0	0	0	0	0		0	0	0	0	0	0	0	0	0	0	0		0	0	0	0	0	0	0	0	0	0
0.5		10.0209	7.55626	-0.59083	2.13439	3.00397	-5.34515	8.62543	3.07515	-0.39719	2.78271	-1.71533	6.1483	2.84027	0.178584	3.12867	1.52523		8.08391	7.13778	1.152	6.44647	8.08598	-4.76972	4.51774	6.81485	7.92387	6.90089	2.57123		7.50138	11.9426	4.40106	5.20601	3.20352	8.89054	2.70091	5.2709	7.43567	0.841623
1		5.47141	4.40335	1.64402	2.69963	-0.359486	-10.6903	17.2509	6.15029	-0.79437	5.56542	-3.43066	12.2966	5.68054	0.357167	6.25733	3.05047		17.0649	15.5556	6.07286	7.5647	5.68031	4.41245	4.76973	-10.1903	7.68166	14.7196	19.3859		15.7262	14.645	3.85299	8.79242	4.50388	13.9176	6.78359	6.09257	11.3646	3.0216
1.5		8.73766	9.00709	3.19819	4.45005	3.06584	-7.80786	16.0333	7.01675	2.18768	6.52531	-0.69529	10.9303	3.55463	0.3741	6.17885	4.31508		18.0395	9.5219	15.5647	5.69041	8.03464	-0.909062	13.9072	7.58322	13.263	14.7761	30.3681		23.5222	17.6698	4.92506	5.93148	9.4511	17.7329	13.874	6.73845	12.4876	1.83798
2		6.57796	12.3132	1.49611	4.58206	5.90616	-4.92542	14.8156	7.88321	5.16973	7.48519	2.04008	9.56401	1.42873	0.391033	6.10037	5.5797		24.5131	10.1613	15.227	10.6598	18.6677	1.89354	8.27035	-9.01372	13.934	13.803	25.6749		27.2497	19.371	7.6117	8.53588	7.92013	17.7005	13.682	10.9894	15.4548	8.42816
2.5		11.6749	12.091	2.35704	5.22852	8.57801	-4.05282	20.5151	11.7751	5.42641	9.53586	4.00665	9.20153	4.80288	-1.61396	5.32423	5.78297		28.3139	14.9431	12.8731	14.1622	21.1084	0.692125	21.4764	8.59469	16.4531	18.7771	24.3855		31.2551	19.7796	8.12204	12.0329	21.4669	18.1861	14.4725	13.3288	14.6527	6.41536
3		12.3253	13.3156	3.53433	10.4994	7.13611	-3.18021	26.2146	15.6669	5.68308	11.5865	5.97323	8.83904	8.17702	-3.61895	4.5481	5.98624		28.012	12.9225	28.0864	17.3064	10.7305	0.705412	9.98125	10.9145	12.4939	17.3795	22.6157		28.5442	24.0333	9.77551	12.1969	12.9585	18.5014	14.7036	16.4389	17.3886	9.37426
3.5		10.677	14.7939	5.86079	6.01444	6.37643	-1.62596	17.6799	13.5226	2.98513	12.366	5.53662	11.1487	11.0099	1.34627	6.85219	8.42454		32.2829	15.526	18.82	17.1209	43.0211	7.24461	11.4227	0.684052	11.9582	21.6739	35.3689		24.9976	21.3874	18.1951	13.3981	10.2241	20.4266	13.9	15.3844	19.1704	8.36562
4		11.2404	12.9031	7.02497	8.85685	13.1072	-0.07171	9.1453	11.3783	0.287184	13.1456	5.10002	13.4583	13.8429	6.31148	9.15627	10.8628		34.7266	15.1076	22.337	20.8104	20.2683	7.85668	11.8745	4.77471	19.0618	18.3581	34.4934		27.9298	22.2956	16.9978	12.1856	13.0869	20.8216	14.5995	11.8435	23.2161	6.7109
4.5		11.1955	6.62864	9.53024	6.58071	14.1197	3.80287	13.9349	11.3904	3.82045	10.8258	4.32911	15.5738	10.9225	1.33502	9.09867	8.92966		39.9114	19.6436	17.1482	20.3496	28.6782	9.43539	19.0318	8.93475	14.5201	11.9774	37.7515		29.9313	25.2142	20.6291	18.6512	19.609	27.0538	14.5008	12.1222	24.5479	6.37826
5		17.4339	10.7934	2.62818	9.42239	13.0689	7.67744	18.7245	11.4026	7.35372	8.506	3.55819	17.6893	8.00209	-3.64144	9.04107	6.99648		36.4922	21.1992	19.6611	22.108	34.0451	3.49381	27.4002	4.75022	11.6202	10.8505	37.9804		33.9123	26.9492	20.6789	13.572	14.5845	20.3714	16.8506	16.3428	27.1536	6.61172
5.5		13.8133	11.7538	8.80423	8.68704	16.4626	-2.20213	26.5965	14.2961	5.10346	9.39002	3.50267	16.4861	8.78288	2.14245	7.60156	9.62203		43.285	21.9962	33.4381	26.788	17.7604	9.16111	28.0079	1.13038	15.4695	14.1646	36.8154		26.1112	31.7816	16.3132	15.6519	8.9195	25.3788	14.5226	14.1692	25.8926	8.6066
6		17.1667	11.6694	7.05546	7.65478	16.1598	-12.0817	34.4684	17.1896	2.85319	10.274	3.44715	15.283	9.56368	7.92635	6.16206	12.2476		45.2682	15.3495	23.1665	28.2028	28.9221	10.2397	21.4932	1.70997	11.4271	10.1254	38.5092		34.7988	33.7718	18.3279	16.3132	13.1815	26.3799	14.4525	15.2354	25.3418	8.65903
6.5		12.3206	11.6043	6.64558	12.8029	15.4555	-2.72412	27.8936	17.6943	0.287183	12.1347	4.25263	16.3626	11.2051	6.77416	8.91427	10.3617		41.9035	22.6901	25.7892	27.7671	39.6374	5.25255	18.5929	0.910265	17.5521	14.376	41.7188		32.973	29.241	22.4097	15.8007	21.007	21.2259	17.0988	15.5744	25.5496	12.8376
7		13.865	11.0438	3.93749	9.46907	15.6812	6.63345	21.3188	18.199	-2.27883	13.9954	5.05812	17.4421	12.8464	5.62197	11.6665	8.47587		43.395	43.7116	23.4982	19.3113	21.138	15.2922	11.5075	2.87354	22.9842	21.9548	28.7816		34.9185	33.858	19.7335	12.5105	29.5445	15.6573	13.037	16.7872	25.6369	12.8333
7.5		11.5374	14.1919	5.96985	11.8502	16.617	8.56621	18.8165	15.9622	0.362622	16.0595	6.27601	17.9256	11.1758	4.80967	12.6382	9.81285		38.6348	28.7176	18.0828	25.1593	21.4207	14.6229	2.79934	0.991874	17.3773	20.716	31.9785		38.3526	33.5743	20.8899	11.6563	29.9496	17.2647	14.2348	25.019	23.7777	9.82474
8		11.8471	14.0935	4.31621	12.2477	10.991	10.499	16.3143	13.7254	3.00407	18.1236	7.49391	18.409	9.50516	3.99737	13.61	11.1498		36.8945	22.6179	27.8666	20.4428	22.2981	19.5908	27.6225	3.3292	22.7111	13.5706	26.7622		38.0774	34.299	25.8113	12.4395	19.5717	26.0411	17.4864	23.3633	25.3446	12.2947
8.5		12.4197	10.5259	7.46061	10.1758	13.5375	11.7143	11.3674	11.8661	0.457542	16.2285	9.37034	18.2751	11.2351	4.801	13.7227	9.94926		38.5345	25.4696	23.2473	17.1186	24.3617	22.5923	25.4305	11.7742	25.7553	19.5497	31.5896		39.6012	31.395	24.8869	14.464	22.5876	26.1786	15.2537	22.4929	22.2656	10.7262
9		11.1262	10.4627	2.3944	6.56804	13.0386	12.9296	6.4204	10.0068	-2.08899	14.3334	11.2468	18.1412	12.9651	5.60464	13.8353	8.7487		38.9277	28.4172	11.5481	20.2495	25.3679	17.4394	30.5802	7.72399	13.2	13.4737	29.6728		43.7243	35.8795	25.0881	20.7949	26.584	16.8788	16.0116	23.6112	26.6657	12.9448
9.5		11.9871	15.6849	4.28561	8.46826	13.8188	12.7599	2.45101	11.2522	2.10995	14.9206	12.4009	19.3134	11.2347	3.44308	11.6877	9.01553		42.8338	22.9919	26.5666	27.8517	37.7872	22.1309	30.0323	1.31485	14.6179	18.3366	33.9028		40.0774	36.0625	32.817	22.2841	29.0007	19.5586	14.8531	22.1745	42.6165	13.7181
10		11.8744	19.328	1.21437	11.1194	8.88468	12.5903	-1.51838	12.4977	6.30888	15.5077	13.5549	20.4855	9.5043	1.28152	9.5401	9.28237		42.5938	23.5483	31.0693	29.0439	25.049	17.8006	30.2108	0.706701	13.1001	15.0063	39.3076		34.5228	35.5984	26.9769	15.2325	21.0747	20.9704	17.2538	21.1189	32.1226	11.2861
10.5		11.1622	15.1925	3.8714	11.2099	12.4347	16.0143	7.55816	11.765	1.7345	17.523	8.24446	20.7887	9.06616	0.105826	9.20411	10.0427		46.5373	28.7457	19.9474	21.3878	25.4089	13.3958	36.3202	12.1369	20.6415	23.8519	46.1424		35.5272	37.1519	25.5098	19.1372	39.1677	20.8556	19.9008	20.4973	33.6917	12.3635
11		9.36573	13.987	5.25118	10.2698	15.0538	19.4382	16.6347	11.0323	-2.83988	19.5382	2.93399	21.0919	8.62802	-1.06987	8.86812	10.803		42.3839	32.7821	7.83433	23.5297	24.7979	10.8306	36.0875	8.39724	20.0998	15.389	38.8642		42.9107	40.2727	28.691	24.6033	29.4432	29.3773	18.9379	20.1025	36.5873	13.4777
11.5		16.4252	13.0163	7.63141	10.6036	19.1696	15.7453	9.25338	15.7092	1.20115	19.5105	10.7618	20.0627	10.0219	-0.05546	11.3945	11.7435		40.2057	34.5145	16.6698	26.8172	17.3661	6.4413	25.5805	3.87141	28.348	16.7737	27.8918		39.6543	37.2385	28.4897	20.5219	40.7836	28.0726	12.7761	21.2815	29.4508	18.8604
12		17.4428	14.0066	3.74167	10.533	19.3338	12.0525	1.87206	20.3861	5.24217	19.4828	18.5896	19.0334	11.4158	0.958952	13.9209	12.684		45.4652	28.6166	24.0906	32.807	32.2021	14.4019	21.7363	10.4693	21.5379	15.603	32.6276		38.9644	33.8914	25.7334	29.0143	21.8195	20.1118	16.3276	18.3554	23.6623	19.1306
12.5		13.5502	15.0757	4.81047	11.6249	20.5071	13.2503	10.1815	16.823	8.27311	17.3587	11.4377	17.6819	12.1019	3.5599	15.3838	11.9191		46.128	33.8185	27.9729	32.6871	37.9177	7.0782	23.7111	13.2651	16.7869	16.1367	32.3793		42.5084	35.772	30.6974	27.1975	31.2151	19.9328	14.1497	20.3414	30.707	21.2429
13		18.331	17.3784	4.67722	9.26397	11.7141	14.4482	18.4909	13.26	11.304	15.2345	4.28581	16.3304	12.788	6.16084	16.8467	11.1542		49.8983	29.328	7.23822	36.2592	26.0999	11.867	24.7197	9.95728	22.4731	19.914	43.7739		40.3299	37.7573	29.1678	22.3272	29.081	21.2748	14.1276	20.2704	28.416	16.962
13.5		19.4937	12.8669	2.70108	12.2519	13.9852	9.78307	12.5135	11.2208	7.78829	16.7659	8.15869	16.74	12.7263	4.79495	12.6435	12.6183		50.1529	29.6338	22.7444	31.0902	30.3562	16.5103	23.3642	10.0803	23.6817	22.0363	43.1623		41.9433	36.989	26.6341	21.518	29.3272	21.5683	12.9375	20.915	25.9834	18.2686
14		9.13031	17.6152	2.39539	11.7454	15.6965	5.11796	6.53612	9.1817	4.27254	18.2974	12.0316	17.1496	12.6645	3.42906	8.44034	14.0823		46.2602	26.4301	31.8314	27.301	26.6238	9.4283	27.5696	20.3828	25.0201	22.306	37.8662		36.7445	35.0353	28.4327	25.6043	28.6195	19.0066	15.7889	20.5774	22.5849	18.6718
14.5		13.5199	15.1426	3.21825	10.1002	16.0432	7.71454	11.4701	11.8352	7.32012	17.4217	5.92271	17.1305	13.6043	4.95409	10.6416	12.0377		51.6324	32.3813	17.856	36.2649	25.7474	10.5074	29.8161	7.43011	22.7565	21.8086	44.1529		33.6665	29.8222	36.1622	28.7933	29.5462	14.5835	21.0711	24.6377	27.3405	18.721
15		13.2572	15.9862	4.22752	11.3939	11.8972	10.3111	16.404	14.4887	10.3677	16.546	-0.18614	17.1115	14.5442	6.47912	12.8429	9.99317		55.0884	43.3387	14.6024	45.0364	20.543	12.2846	31.1015	5.7572	17.6965	15.905	43.8713		37.8786	30.1328	34.9576	29.8463	28.4667	14.7082	18.1357	22.7919	25.5921	18.5774
15.5		10.5038	11.8697	3.94203	13.3106	17.794	14.1634	6.41418	12.2292	2.67475	15.5284	4.73822	18.6864	10.0009	7.90719	10.829	8.41158		49.553	37.9639	17.2369	41.2569	13.3797	9.09772	23.4809	15.2362	30.455	23.3099	38.2793		44.4961	30.6104	30.848	29.4114	38.9247	12.4273	21.4623	24.6695	32.5204	16.4762
16		16.6197	13.3963	6.92906	12.78	16.298	18.0157	-3.57566	9.96968	-5.0182	14.5107	9.66258	20.2613	5.45758	9.33526	8.8151	6.82999		49.2635	34.2214	19.3037	32.3799	27.1526	16.3228	20.3083	11.8292	32.5514	20.4514	34.365		38.9963	34.2552	31.425	28.0804	52.536	15.0742	19.3366	26.4975	31.803	18.8144
16.5		12.1569	14.0953	2.17966	11.541	19.7464	11.3185	4.61435	8.44377	0.645982	15.7578	8.68023	17.7532	8.13987	5.09213	8.65733	8.15781		46.1212	31.8823	20.1579	34.824	26.3792	12.377	32.8376	7.99238	34.3409	22.3921	33.6996		37.7768	32.5145	40.6298	30.0815	51.1049	15.0434	25.5176	28.6089	29.8308	18.2529
17		11.6458	16.2451	2.63938	13.8002	17.771	4.62135	12.8044	6.91786	6.31016	17.005	7.69788	15.2452	10.8222	0.849004	8.49956	9.48563		46.7641	50.2995	25.1856	32.9632	24.5029	21.8046	32.9058	1.29976	31.7471	20.5947	41.0022		42.063	31.954	42.4915	31.8008	24.5518	16.6417	28.865	26.3958	37.1909	19.4143
17.5		9.01581	16.3752	3.11561	11.5502	19.0404	3.23379	14.6306	11.1977	4.41817	15.6881	8.54632	17.6542	13.317	1.06572	7.47037	8.41197		44.7083	38.6991	21.8868	30.2231	26.7912	26.2987	30.3856	13.7826	28.7613	28.2256	35.6154		40.413	34.0878	38.6736	30.2586	30.7479	17.8548	25.0989	26.489	29.5375	16.9438
18		12.893	13.5505	0.424858	12.3452	23.3443	1.84624	16.4569	15.4776	2.52618	14.3712	9.39476	20.0632	15.8118	1.28243	6.44118	7.33832		46.63	46.7355	17.2483	45.5821	40.0465	26.5768	27.525	12.4299	25.4456	26.2554	41.0827		35.2329	39.7585	39.03	29.3602	24.4684	14.5737	31.3833	26.5034	37.3912	19.8799
18.5		12.9164	15.5435	3.83579	6.30855	20.0228	5.49569	9.77196	12.5855	5.3767	16.0767	11.0573	17.9903	12.2118	0.694295	7.94296	9.40971		46.8932	54.0375	39.035	40.8039	43.8186	31.9139	28.2939	6.48495	23.8553	20.6217	40.3572		30.4053	42.2674	40.6022	34.8929	34.1939	17.1915	31.9383	24.4133	41.4627	17.292
19		10.7282	12.8575	7.99148	15.4751	14.8881	9.14515	3.087	9.6934	8.22721	17.7821	12.7199	15.9175	8.61185	0.106163	9.44473	11.4811		44.4325	36.9236	32.3412	33.9183	35.881	27.5892	28.7767	7.72085	28.6619	17.6794	40.3578		32.5347	39.1524	35.5607	30.7323	29.0531	15.0503	26.1295	28.1296	39.8805	11.9476
19.5		13.9545	12.663	7.45378	17.4018	18.8111	8.8087	3.82496	9.94337	6.68551	17.2485	10.7096	18.4488	14.05	-0.26195	6.64949	13.0616		42.924	49.4572	38.8404	37.8885	53.0289	27.5886	28.1009	2.69626	30.6103	24.0402	39.1908		38.7079	40.0358	35.036	33.2301	18.6052	20.6552	26.5434	26.2116	37.2543	16.4412
20		16.8549	14.3575	7.75282	15.2313	19.0138	8.47225	4.56292	10.1933	5.14381	16.7148	8.69922	20.98	19.4882	-0.63007	3.85424	14.6421		43.0514	63.9418	23.9189	29.1177	33.3958	27.9544	24.2097	11.4158	29.414	17.0027	35.9613		35.6045	37.6885	32.4984	42.3045	35.1169	27.523	28.864	26.6749	40.0288	17.8323
20.5		10.029	20.5471	7.0896	12.6049	21.7941	4.93761	-4.48669	12.1456	4.83853	17.9737	10.6787	20.1328	18.6052	0.803536	7.51399	9.09822		45.9841	78.544	28.8241	37.4057	48.3744	16.7086	21.7328	7.52656	44.5264	19.7104	42.8604		37.5461	35.0119	32.9928	37.5904	44.6981	25.7277	29.0264	23.3445	30.2308	19.3075
21		13.5071	16.6118	5.88543	15.3581	18.7226	1.40297	-13.5363	14.0978	4.53326	19.2327	12.6583	19.2856	17.7222	2.23714	11.1737	3.55432		44.8406	55.2434	14.5302	45.318	37.4986	16.5171	24.8094	10.7978	40.2866	17.0916	30.1075		41.4802	30.2814	33.2254	41.5486	44.2423	24.4185	32.5902	22.815	32.8235	17.7068
21.5		11.8407	21.4581	4.89528	10.228	18.5038	7.49425	-2.60688	12.4784	3.6035	20.2971	13.7925	20.7237	18.9143	3.32719	12.0213	6.51394		39.3189	57.1774	12.2307	38.832	25.8641	17.754	26.2629	15.172	32.9248	25.9126	38.7303		40.2568	31.8265	31.0741	40.5278	39.7928	22.6462	29.9322	22.6082	37.6373	19.9624
22		14.863	17.9635	9.59408	11.6285	18.8737	13.5855	8.32255	10.8589	2.67375	21.3615	14.9267	22.1619	20.1063	4.41725	12.8688	9.47355		39.2817	55.4578	27.95	32.5502	37.1816	29.3946	16.9864	12.8062	28.0535	15.6654	48.2547		44.7521	34.6978	31.582	42.114	41.7837	24.7432	24.515	26.4305	33.337	21.4654
22.5		14.2177	17.3383	7.90421	10.6128	17.1038	12.9846	6.19843	12.8207	0.21373	18.5411	16.7662	19.9385	18.8583	4.20141	13.7481	9.15111		32.1294	52.1474	31.0385	41.4459	30.2421	24.9992	13.1859	-0.290456	28.8902	18.8756	40.8644		47.2866	30.5581	30.1547	37.7405	36.4166	25.0285	35.5381	25.2504	35.252	20.6601
23		12.2374	17.2596	12.7256	11.0636	17.36	12.3836	4.07432	14.7825	-2.24629	15.7207	18.6058	17.7151	17.6103	3.98557	14.6274	8.82867		29.9106	51.0309	11.5882	37.2833	33.5061	40.5313	14.4832	12.734	23.4052	19.8692	43.4281		35.4566	30.1491	38.9615	39.8904	28.6381	29.9523	34.6999	24.3408	33.2107	17.2272
23.5		10.4971	17.3134	14.8626	10.1683	21.8257	21.1222	7.19613	15.6134	6.52721	16.4577	19.1389	19.148	17.1066	4.90777	14.3818	10.2846		32.6046	48.4035	16.0525	27.1378	32.0677	35.1813	23.8728	0.440541	29.6505	24.3816	40.2562		31.8974	29.3873	39.6696	36.7961	31.3191	32.0147	38.9172	27.1102	40.8475	22.4404
24		12.2639	17.308	11.674	14.0038	18.4558	29.8607	10.3179	16.4443	15.3007	17.1947	19.672	20.5808	16.6028	5.82998	14.1361	11.7406		34.6266	53.9953	28.498	39.7376	25.0285	30.8816	13.2331	10.2273	29.7824	27.2858	35.2311		35.6595	30.1061	40.3961	39.0352	32.0274	30.2889	33.4484	27.9641	52.0052	23.5544
24.5		9.74238	17.0017	12.785	14.7441	19.785	22.0566	14.0146	15.1803	8.09331	15.9111	15.3182	22.1485	19.0912	6.9898	12.2464	13.5084		32.9838	51.9675	37.9602	35.2676	23.1889	27.2346	19.1663	8.71541	37.6823	20.1875	38.4575		35.0981	31.1741	40.9753	44.2902	40.6914	26.318	27.0823	21.2873	46.3247	22.8206
25		9.8464	16.5765	14.6962	14.4995	17.8489	14.2525	17.7114	13.9164	0.885899	14.6275	10.9644	23.7162	21.5796	8.14963	10.3567	15.2763		37.7359	56.6087	34.6995	39.628	20.6848	15.1849	16.5289	10.5736	44.4455	12.1466	35.5738		36.6064	27.9199	40.1625	42.5259	37.3224	25.2159	23.7112	25.8984	41.5848	23.8766
25.5		10.0023	19.7889	18.1878	11.8165	16.3392	10.5684	10.3278	15.8087	1.34983	15.3917	11.9201	23.8619	21.0873	3.38653	11.7044	13.5801		37.7163	53.4158	23.2164	39.9707	26.0395	21.9853	25.1246	5.38111	39.4561	21.8538	35.4991		31.7884	31.3379	41.3954	47.7283	37.9484	24.0012	23.5902	27.3628	43.9277	26.8998
26		7.97945	22.8707	12.5411	11.1409	18.7876	6.88417	2.94422	17.701	1.81377	16.1559	12.8758	24.0076	20.595	-1.37656	13.052	11.884		30.3558	39.2373	28.7593	39.0437	27.8032	19.1076	24.8077	7.94394	30.6238	15.7376	46.483		26.34	36.2305	42.7835	59.6525	27.7381	27.7296	30.3041	30.1316	39.1001	23.3735
26.5		10.0004	24.8135	13.2439	14.1049	17.8804	6.9591	8.87228	17.1089	5.5118	18.4623	13.2504	25.4707	16.9741	4.3592	11.3345	11.6192		31.473	53.5681	18.7246	48.1735	25.9342	21.9028	19.8858	1.74278	34.386	15.9721	48.093		28.9395	37.2506	44.7099	52.5955	33.3735	27.7961	28.9241	34.1445	27.0982	28.8248
27		14.3093	20.9398	7.90785	12.1699	16.6574	7.03404	14.8003	16.5168	9.20983	20.7686	13.625	26.9338	13.3533	10.095	9.61691	11.3545		36.7418	54.5152	25.9161	52.6396	23.524	21.6447	17.9361	11.7505	41.3484	15.3859	50.9431		27.3928	35.3814	39.9327	53.8179	28.1327	29.8858	33.8756	31.1369	27.158	25.9419
27.5		14.2913	18.8732	11.0085	16.8097	22.0174	5.45515	4.23907	15.2047	11.2976	20.7388	12.5642	25.7286	15.2359	7.75619	9.07221	13.1114		34.9381	54.4281	28.3135	36.9997	30.5214	15.3887	26.3136	16.2735	35.0485	10.3099	55.5225		27.7607	33.9055	41.6088	55.8156	44.3992	29.1635	24.6977	31.0821	40.5023	23.4655
28		12.5714	17.6501	14.0384	12.1555	22.3595	3.87626	-6.32221	13.8927	13.3854	20.709	11.5033	24.5234	17.1184	5.41741	8.52751	14.8684		43.128	38.9923	21.9135	42.5722	32.5147	25.7848	24.6361	3.64809	33.4817	20.2371	43.8799		30.3505	35.2011	37.9884	47.0336	31.5161	29.6784	29.6387	31.409	34.9837	23.3767
28.5		12.345	15.7841	16.7457	13.9205	27.1285	2.65492	3.11683	15.0675	9.16174	20.0224	9.9004	21.5878	17.4643	2.29141	10.8008	13.2535		40.6843	32.9155	32.0729	49.4916	25.9937	25.5429	34.3538	13.2766	28.1003	22.3607	45.4187		26.1289	38.3726	39.0662	46.8371	33.5895	24.9963	27.31	27.9669	39.0924	22.5617
29		16.9766	14.5937	13.9489	15.9647	19.1188	1.43359	12.5559	16.2423	4.93808	19.3359	8.29745	18.6522	17.8101	-0.83459	13.0741	11.6387		35.2494	53.2126	24.9842	40.0242	24.1537	35.9992	29.543	6.36216	31.2098	15.768	46.9798		29.8533	39.7648	42.9718	44.307	35.2034	24.6119	22.6414	34.973	36.4268	24.7579
29.5		15.8327	15.7892	17.3138	14.5751	22.9159	-2.06436	16.2257	16.8476	6.73583	18.6911	9.343	18.4998	18.6338	2.19962	11.9844	11.6486		39.0515	34.0872	24.6442	49.2427	26.1496	36.1746	30.4249	10.2969	38.3516	17.4664	45.6345		36.5702	33.5548	46.5159	46.2583	28.8169	30.8246	24.7032	38.2902	35.2093	22.8415
30		15.6007	20.3251	13.5212	13.6341	19.1025	-5.5623	19.8955	17.4529	8.53359	18.0463	10.3885	18.3473	19.4574	5.23383	10.8947	11.6585		41.3429	45.6577	22.8636	52.2982	23.236	36.0407	28.3952	14.3446	26.3164	8.69428	49.2832		29.2244	33.8739	41.482	43.9728	42.6256	25.6448	25.831	32.1073	32.9056	23.0637
30.5		18.3428	17.4516	10.5267	17.1763	15.9198	4.94602	18.3471	15.9451	6.81537	20.1176	10.101	21.3726	19.7456	7.65006	10.0842	13.3942		38.0638	45.5216	29.4185	47.0659	21.5992	40.0859	37.9567	10.4707	23.4724	17.9101	52.3151		35.3785	37.6759	40.8494	43.4557	25.1679	30.6003	26.7813	39.3162	46.0889	19.2915
31		12.6064	14.307	10.7092	18.9643	22.7016	15.4543	16.7987	14.4373	5.09714	22.1887	9.81348	24.398	20.0338	10.0663	9.27382	15.1299		37.5603	37.2477	28.2469	46.7645	21.854	36.0749	25.7144	6.39991	23.2417	15.7943	48.1856		33.2281	41.0923	42.1514	40.0859	47.3363	30.9289	25.7402	34.3317	40.7079	19.3282
31.5		18.9759	21.9778	15.1329	15.8059	22.9538	10.0942	14.5965	13.9486	7.85528	19.1195	8.34832	21.6076	16.5265	6.6502	11.1632	14.3072		37.891	38.1606	34.3124	44.4612	32.1859	25.3659	32.0333	7.95469	27.7529	23.9864	43.3722		32.1777	37.8121	35.6702	41.4078	22.0422	31.3765	25.7133	31.9927	36.742	17.9377
32		12.1263	17.8231	13.6615	16.718	20.0891	4.73398	12.3944	13.4599	10.6134	16.0502	6.88315	18.8172	13.0193	3.23409	13.0527	13.4846		39.1256	51.7619	29.7698	47.8316	36.3466	35.8245	28.1263	9.83986	21.4745	25.8103	39.4113		32.0793	44.2417	39.1464	49.0657	23.5724	30.014	25.5915	31.9233	35.1476	15.3547
32.5		13.2525	18.4065	13.9903	15.0459	22.7149	1.0205	3.38979	14.8785	4.87894	18.493	9.64836	20.3914	14.176	1.27202	12.3175	13.0259		44.3836	45.9481	27.1445	40.1363	35.8203	30.9152	22.3399	7.96857	37.6005	26.5414	43.7837		37.6595	47.1615	40.1493	56.708	57.9669	35.5208	25.3486	31.9623	39.5262	16.8099
33		15.6096	15.4293	13.4628	10.7974	21.3878	-2.69298	-5.61479	16.2972	-0.85555	20.9358	12.4136	21.9656	15.3327	-0.69006	11.5824	12.5671		44.7871	34.9577	20.9583	44.0426	29.2865	32.7572	23.2231	18.0957	32.4679	20.1968	48.1583		41.6207	46.5316	43.9106	50.1854	24.7501	35.1076	31.1895	43.1669	28.5642	20.5254
33.5		16.9286	17.1651	10.5098	12.9616	20.9524	1.90993	-0.73692	15.2026	5.11665	19.1701	10.574	19.7309	17.5018	1.23936	10.4807	12.1433		47.7598	39.6485	26.95	52.6963	30.6962	30.333	27.8672	9.10312	31.916	12.5854	51.7704		43.1795	39.811	44.5073	51.654	36.3402	33.176	31.7387	41.0239	25.031	22.982
34		13.9554	16.16	11.1984	15.6567	20.6106	6.51284	4.14095	14.1081	11.0888	17.4045	8.73447	17.4962	19.6709	3.16877	9.379	11.7196		42.9615	49.7308	25.182	43.4999	26.1484	30.0782	21.5181	1.82047	32.022	15.3239	47.6167		46.4645	42.9325	40.2317	49.1709	31.528	31.5886	29.6753	41.758	25.9317	18.276
34.5		18.4563	17.6164	11.5676	13.8186	21.9145	6.95084	2.6635	15.1735	6.83139	13.9802	14.269	18.518	15.2551	6.07369	10.2531	13.9343		54.085	44.745	44.3978	52.8795	27.3553	33.395	26.1057	11.1698	34.49	16.14	48.8823		41.3786	47.808	41.2675	47.778	29.5395	32.319	24.4926	39.3418	33.4712	18.8892
35		17.4051	13.8406	12.1796	10.6248	20.6163	7.38885	1.18605	16.2389	2.57395	10.5558	19.8035	19.5398	10.8394	8.97862	11.1272	16.1491		52.734	47.4405	28.1392	56.3442	10.5389	24.1492	14.9471	17.246	37.0335	23.9228	50.9308		44.0321	42.1883	44.0734	52.5075	32.3539	36.6547	30.797	34.3964	40.2955	22.5335
35.5		15.7144	17.0646	12.0128	12.114	21.2884	3.63052	1.12811	18.5794	3.92848	13.0054	19.4463	22.568	10.0462	8.87038	5.89895	12.1855		60.115	50.634	13.2485	48.1954	28.6993	27.5676	19.9232	5.1325	19.4851	21.6507	46.9616		43.792	39.0691	49.6499	51.2929	24.88	30.3374	28.3938	38.4193	49.4382	24.8594
36		17.878	11.4318	11.0015	12.5831	21.7191	-0.12781	1.07017	20.92	5.28301	15.455	19.0891	25.5962	9.253	8.76215	0.670704	8.22199		55.7758	38.232	30.3147	35.8095	24.5769	31.4918	14.7403	8.44323	23.0462	24.4706	47.8128		44.3847	42.0271	50.754	54.7532	37.8764	30.0851	25.4978	38.2511	54.3395	20.3379
36.5		15.4835	14.4819	11.3341	15.0963	14.8347	0.566722	11.6516	19.457	4.28891	15.6037	18.356	24.2732	11.5438	10.8856	6.29282	10.0699		55.9066	39.141	36.1849	39.8135	24.1168	32.0666	24.4329	11.4215	34.6192	23.3207	52.173		45.938	37.244	48.6299	58.552	37.4122	30.7859	26.7023	44.8973	53.9306	16.7127
37		12.9146	17.9289	7.66733	16.7493	16.0622	1.26125	22.2331	17.9939	3.29481	15.7524	17.6229	22.9502	13.8345	13.009	11.9149	11.9177		61.3081	34.8457	25.6767	37.565	25.2605	31.2031	12.3772	7.0853	43.3547	17.647	46.0122		47.564	38.2006	48.0826	51.7383	32.0381	26.323	28.3404	36.1897	56.5634	19.7885
37.5		11.0324	12.7078	11.9709	14.4469	21.512	6.63161	23.0197	14.838	3.89418	14.9401	11.7487	21.9147	16.93	8.36669	8.49241	10.4892		56.2815	29.104	33.4691	43.9839	28.5707	30.3708	17.6261	11.6566	38.3983	24.2658	45.0327		42.6598	36.9967	46.9419	52.4306	50.6752	29.9388	24.9357	37.8432	55.83	16.2352
38		10.3641	10.9733	11.3615	17.0656	20.8077	12.002	23.8064	11.682	4.49354	14.1279	5.87455	20.8791	20.0256	3.72439	5.06989	9.06061		61.4368	35.1122	27.971	38.4457	24.8132	39.8235	13.9315	17.2564	26.6066	18.5946	44.4489		41.0489	36.1131	45.2927	46.9146	29.0058	28.2206	22.5983	37.0514	52.0271	12.6573
38.5		15.5541	14.3951	12.5215	15.2895	18.8323	6.40175	12.2167	14.6028	3.06089	15.438	8.25019	20.3597	12.5172	7.04034	6.66811	9.95988		57.6282	47.701	28.2385	41.7266	30.1727	36.7923	19.4545	13.1228	24.46	16.3162	56.5362		40.7234	33.8389	43.4008	44.4731	21.7849	23.2724	27.078	44.9831	56.7544	16.4857
39		15.8543	12.0433	11.8426	13.2081	17.7491	0.80153	0.626983	17.5237	1.62824	16.7481	10.6258	19.8403	5.00876	10.3563	8.26634	10.8592		61.4076	29.9766	17.1817	42.0799	30.011	26.1611	29.3594	10.3119	21.5053	19.6092	50.1516		46.9103	36.1835	45.4805	35.5611	18.7389	20.8378	29.0124	40.7259	59.746	20.5118
39.5		14.7788	10.3882	11.5366	12.9206	21.1143	5.74142	11.1174	17.9557	2.02788	16.6937	15.1535	21.3022	7.34338	7.88917	12.0976	14.2589		55.5073	46.0734	27.5522	42.6464	25.1961	22.1204	18.009	7.94285	30.0343	22.3268	54.6346		38.8373	37.6488	42.4084	38.063	27.5457	16.5506	28.8994	34.5047	57.8171	20.068
40		11.4158	12.4217	6.59273	14.7073	21.7521	10.6813	21.6078	18.3878	2.42753	16.6392	19.6812	22.7642	9.678	5.42203	15.9288	17.6585		53.5803	37.4277	18.801	41.3856	43.9307	31.3243	20.9525	9.26817	27.363	21.7405	54.7492		40.3345	37.0854	42.9529	42.3662	39.8466	18.1371	28.4251	33.879	64.0445	25.8829
40.5		12.6879	13.9603	7.87248	10.6275	17.0438	6.86032	14.8724	19.0059	6.55745	14.2905	19.7543	21.5066	13.3968	4.24077	18.1768	16.1201		50.8936	33.9611	28.1794	35.3638	25.4961	34.9943	17.9041	15.0691	31.1237	17.7111	63.5825		42.4283	39.4241	43.2953	50.0626	39.313	23.7515	25.7937	30.9499	67.6026	29.9581
41		15.3479	15.1142	7.85392	17.8141	20.2061	3.03933	8.13684	19.624	10.6874	11.9418	19.8273	20.2489	17.1157	3.05951	20.4249	14.5817		55.4513	21.1268	34.9452	34.8149	24.1771	41.4889	26.0798	11.889	25.3808	21.3022	52.0309		41.9887	40.0962	45.8357	53.2653	36.5278	16.6405	26.9825	35.2175	54.1482	30.536
41.5		12.0562	16.5735	9.44854	15.3633	17.5378	2.37012	9.07864	17.4734	9.37418	12.6108	17.1149	20.3716	14.7217	3.68545	18.4704	12.0844		50.0472	29.5931	34.5028	41.5018	43.5257	35.2029	19.4237	13.432	34.1474	20.0346	48.4152		41.9612	37.7339	50.0454	55.4537	39.755	20.1133	24.5761	34.6806	55.5681	35.0447
42		13.6153	14.1727	5.97888	15.4366	20.1503	1.7009	10.0205	15.3228	8.06097	13.2798	14.4025	20.4943	12.3277	4.31139	16.516	9.58714		51.219	30.1706	38.2271	35.2347	31.6035	31.7325	31.0557	10.43	34.3126	21.5926	44.6597		38.8806	36.8267	51.5805	58.6436	13.4698	29.4553	23.9492	29.6399	54.2138	29.0202
42.5		14.5192	13.1111	7.68188	16.415	22.5232	11.7143	20.6344	15.9765	6.29201	15.0258	11.8141	21.8876	13.8026	7.84921	12.489	9.57129		53.9085	28.75	25.9111	38.0641	23.8042	31.688	25.7782	14.2617	30.3781	28.0562	45.1074		43.297	33.0567	48.9125	59.614	27.2244	18.9838	20.154	41.7522	55.7602	30.9193
43		15.1907	14.2706	7.17014	14.5448	21.1853	21.7277	31.2483	16.6301	4.52304	16.7719	9.22563	23.2809	15.2775	11.387	8.46197	9.55544		56.8641	36.2366	30.0277	32.4301	18.227	30.9987	19.7751	16.7493	28.0081	30.0668	41.6737		46.6821	34.5048	51.0189	59.7153	28.5394	22.4661	21.4365	29.918	50.6265	37.2444
43.5		14.3325	17.1425	2.59264	13.7739	26.4454	24.8145	23.2587	15.6166	6.40638	15.3015	11.5188	22.0439	15.9998	11.0602	12.1875	12.4842		56.0242	21.3173	18.9744	34.4146	20.4785	27.2903	16.1021	14.1472	37.7861	29.3561	43.2461		38.5915	34.715	44.7295	63.4257	28.1634	24.3468	20.3818	33.7325	52.9427	32.9761
44		12.8858	17.9796	4.18042	13.0506	24.8816	27.9012	15.269	14.6031	8.28971	13.8311	13.812	20.8068	16.7221	10.7333	15.9131	15.413		62.3332	34.81	30.0973	32.0021	17.293	28.8241	16.9122	9.4513	29.8508	29.6457	38.0398		39.5292	35.267	50.0674	65.1869	28.605	22.0338	22.6559	33.3348	58.9942	34.8639
44.5		13.6025	14.9218	6.53251	15.6731	26.134	18.9487	15.3917	15.579	6.52882	17.2379	13.7899	20.4811	13.1723	10.3369	13.9921	12.645		50.5019	28.1484	36.4292	37.7629	33.0184	40.0422	14.4533	9.43241	35.6276	25.1003	45.8362		37.843	39.1097	48.9137	57.8324	22.6318	20.4634	19.1896	38.3687	60.6073	30.3619
45		14.7395	14.5184	10.2911	15.9434	25.6198	9.99624	15.5144	16.5548	4.76793	20.6446	13.7678	20.1554	9.6224	9.94044	12.0711	9.87699		56.0292	28.3276	26.7041	47.1933	25.5244	38.5572	20.2228	19.8037	39.0065	29.0719	44.7257		42.764	39.9169	55.8884	60.5061	40.2743	18.1108	21.6431	32.9029	63.3395	35.2266
45.5		15.0293	10.939	11.5288	14.4918	20.0461	9.70772	10.8127	17.9425	2.47857	17.8872	15.9529	20.635	10.9315	13.9109	9.89194	10.7246		52.604	31.7202	22.783	40.6645	25.9848	36.9963	33.2503	6.14729	36.5418	28.034	44.2796		47.3244	37.3651	51.5782	55.2281	26.1616	12.5747	26.8012	35.6627	62.0838	33.6533
46		14.0349	12.4733	10.6226	16.3878	22.8608	9.4192	6.11108	19.3302	0.189203	15.1298	18.138	21.1147	12.2407	17.8813	7.71279	11.5722		56.9472	28.8495	21.2147	39.7119	28.6403	31.4807	36.9596	11.5722	29.2971	23.8676	46.9271		47.5502	42.9002	54.0227	62.3879	28.7937	21.1911	19.9592	36.7629	62.0223	33.4071
46.5		16.9156	10.6495	8.04816	14.3122	22.5093	7.36535	9.11569	16.3836	0.73688	15.4915	18.3884	18.791	12.9513	14.0955	8.81519	10.7111		67.3917	23.9703	20.7321	33.6724	37.1088	25.3123	23.4972	12.2577	39.2415	21.284	49.3726		53.6078	41.2016	58.88	57.0708	32.7593	22.4899	12.9673	35.467	58.9614	30.1398
47		15.8951	15.1789	12.9823	20.5151	21.8712	5.31151	12.1203	13.4369	1.28456	15.8531	18.6387	16.4673	13.6618	10.3097	9.91758	9.85006		70.4605	26.9695	20.8204	30.8332	35.8198	24.7356	33.9395	7.10361	35.4468	32.807	29.6651		54.2972	40.2858	57.0924	58.2329	49.7676	12.7975	14.7035	40.314	65.3546	36.9462
47.5		14.3036	15.5379	10.5539	15.4371	22.3831	7.94175	9.71177	15.0677	2.56848	18.8996	19.5292	18.4662	13.3084	9.77152	11.1955	10.8269		57.6087	43.7799	29.6084	28.7171	26.2178	28.2063	27.0483	12.0996	34.7634	25.6596	48.8427		57.22	37.6294	49.01	65.7764	56.2272	15.1279	17.287	38.3164	59.4949	33.9227
48		17.7205	13.4213	6.89402	15.6244	23.986	10.572	7.30326	16.6984	3.85241	21.9461	20.4197	20.465	12.9549	9.2333	12.4735	11.8036		57.9015	31.86	33.4344	35.6427	25.1587	30.5855	20.3472	10.0242	32.0863	27.0404	48.7001		53.535	38.3958	50.1572	66.4676	33.6528	17.6688	16.2781	36.6469	51.4923	30.0328
48.5		16.2464	17.1743	7.7149	16.565	26.1325	16.368	8.63076	17.1595	5.23354	20.254	18.1807	16.3808	16.0217	6.58945	11.8581	11.0104		65.2328	35.5322	23.9748	24.6169	37.6969	23.1352	27.4799	12.1074	37.446	27.2115	50.7966		51.1251	38.5875	50.1642	69.2099	41.2253	16.4559	20.9979	37.7237	59.7847	25.9564
49		14.1599	15.7861	7.64715	14.706	24.4387	22.164	9.95827	17.6206	6.61467	18.5619	15.9418	12.2966	19.0885	3.9456	11.2427	10.2172		61.8683	30.1417	46.1425	29.9934	22.3739	28.2184	29.6497	16.4721	45.7357	29.9055	52.3152		43.6968	41.8738	51.7329	72.8883	50.9743	17.0053	24.2067	43.449	64.7695	27.2914
49.5		13.5096	19.8032	8.23932	16.9457	23.5493	23.939	8.97203	16.9911	4.4554	17.8444	14.9105	17.7335	17.3131	7.01444	12.0465	10.4452		53.5449	49.8805	26.3432	33.8297	23.9096	25.9375	29.1845	18.7192	50.5509	33.5152	51.8331		47.9057	38.5536	45.6614	64.933	38.7972	22.234	29.7737	37.113	57.1151	28.3026
50		15.5188	17.0686	5.68573	12.7926	22.5084	25.7139	7.9858	16.3617	2.29612	17.127	13.8793	23.1703	15.5376	10.0833	12.8504	10.6731		46.2723	34.4465	23.4167	42.9706	18.0533	22.9948	33.1174	18.0498	43.3326	31.8788	65.4022		43.4502	42.6221	47.9184	65.0667	51.2486	21.9085	31.9605	31.3986	62.3118	20.025
50.5		16.7681	13.6632	3.80331	17.3188	24.8886	19.8928	12.0207	16.0501	2.92457	17.2125	15.9536	23.9167	14.7335	8.55516	10.4028	9.4405		55.1407	51.4267	25.7796	37.8713	15.4346	32.917	22.0338	13.4275	37.8956	32.7859	51.1769		50.6472	37.1976	49.7317	59.0777	56.1126	18.0369	29.0565	33.9284	55.4541	23.8739
51		14.1968	14.9333	6.35038	16.2244	25.5934	14.0716	16.0556	15.7386	3.55302	17.298	18.028	24.663	13.9294	7.02705	7.95513	8.20792		55.0433	45.1494	27.8318	52.6698	33.2475	17.791	21.0061	5.10384	35.975	31.1882	47.2273		45.2077	37.5101	48.7662	67.9975	51.0562	20.0569	22.123	35.7736	49.1822	28.4207
51.5		13.3252	10.6757	8.8032	14.8415	22.4959	9.16598	4.08233	14.598	2.83434	17.2009	20.7346	22.452	15.309	4.68563	9.98694	8.00288		49.142	43.3743	31.4921	58.4287	42.5326	28.3208	24.6033	12.4139	24.3461	30.4463	51.3319		50.356	39.3461	44.1791	57.1506	51.5571	21.8127	20.4171	38.6017	52.6452	30.4104
52		12.7508	11.8857	13.676	11.2297	20.0472	4.26035	-7.89096	13.4574	2.11566	17.1038	23.4411	20.241	16.6885	2.34421	12.0188	7.79784		47.0909	41.6709	47.1359	31.5551	48.3049	22.3013	7.90141	12.5189	28.238	31.1576	45.6941		48.2311	39.5268	39.0333	56.2998	35.2516	22.4543	19.4563	36.0341	49.0599	26.5908
52.5		14.9286	12.7553	6.40416	13.252	23.2099	-0.64649	6.90052	13.7658	0.170691	16.7192	23.0438	20.5978	17.9732	2.76268	10.1276	8.4016		42.0448	36.5783	41.6906	47.7357	38.2755	25.022	21.7515	13.5108	24.3754	23.6402	55.3046		50.3233	39.3832	39.4254	54.0815	55.2255	21.0143	23.1104	32.5079	49.9346	23.9658
53		12.5435	13.8894	7.629	15.5687	24.3043	-5.55332	21.692	14.0742	-1.77428	16.3345	22.6464	20.9545	19.2579	3.18115	8.23656	9.00537		43.6835	40.2317	35.7987	37.5569	37.8326	20.9989	17.8443	19.8767	21.3359	17.139	45.6009		51.3837	44.0537	43.2036	55.3223	19.9084	22.6181	22.0869	34.1836	52.8014	30.57
53.5		13.3681	17.1434	9.64763	12.9667	22.4479	-2.73023	5.91551	13.5659	2.9236	16.3546	20.0174	23.6847	16.9435	6.37185	10.6598	7.99824		50.5877	43.5581	12.6962	37.2371	33.0407	26.8683	11.0377	8.04106	30.772	26.7769	58.1627		48.5534	47.0629	42.6846	52.4696	24.5786	20.1239	27.4823	27.1016	53.5889	33.5627
54		11.069	12.6682	3.80675	17.1274	27.7624	0.092863	-9.86098	13.0576	7.62149	16.3746	17.3883	26.4149	14.6292	9.56255	13.0831	6.99112		52.1571	40.0476	25.222	36.3433	36.2476	22.1941	7.06243	16.0068	34.4028	19.7589	58.6997		58.2132	44.2085	40.7649	42.9622	15.0101	20.2919	21.2483	28.9328	53.1141	32.8561
54.5		19.7172	16.4534	6.96912	16.3942	22.0216	4.68609	-6.36524	15.4656	8.81134	16.2699	21.0534	27.0086	17.1686	9.45733	11.2229	7.18754		45.5414	47.8492	22.6271	44.1942	34.9447	25.4269	6.5812	14.9338	27.7317	19.6595	69.9442		52.4996	48.2473	40.1388	48.6832	37.9535	17.633	27.4022	33.3425	49.5884	32.4747
55		13.3984	14.3691	3.52002	17.6033	26.5499	9.27931	-2.8695	17.8736	10.0012	16.1652	24.7186	27.6022	19.7081	9.35211	9.36267	7.38396		49.1242	43.9833	32.4937	30.9424	36.8434	25.1078	-3.34067	11.0601	23.8393	23.0872	61.0532		55.0549	44.9921	42.2199	45.1885	33.814	18.0388	24.643	37.315	48.6954	30.7807
55.5		17.0141	14.8984	4.00924	15.0541	20.4448	7.24041	-6.84225	17.9961	7.93452	16.9029	21.3814	27.1346	17.7821	9.99472	8.04387	9.08564		48.2996	39.5521	43.437	46.1094	37.9928	34.9166	2.69282	7.86192	36.4751	34.2092	47.7866		57.1405	49.368	34.0267	55.0526	43.9106	18.2096	24.6148	37.724	52.0489	28.7794
56		15.3416	12.5888	5.8279	14.8953	23.4527	5.20152	-10.815	18.1186	5.86786	17.6406	18.0441	26.667	15.856	10.6373	6.72506	10.7873		45.9161	35.6466	40.4356	32.6297	28.4345	30.0189	-1.8458	11.5342	33.0604	23.0374	51.7233		58.9515	48.3092	35.6669	51.1482	27.9876	16.3112	25.7906	34.154	57.5278	30.2693
56.5		10.3541	14.2311	9.06623	17.9895	16.8209	10.5484	-1.77693	17.0572	8.83259	15.2351	18.9818	23.9854	15.43	10.4764	4.8306	10.1463		55.6348	40.3267	32.8358	43.8356	26.0015	39.2914	11.5289	16.1709	30.7344	20.8943	48.8541		60.9417	48.6317	36.5012	58.5312	33.9628	14.6894	22.4161	33.8778	57.6791	33.536
57		13.4378	19.7955	16.0494	13.786	20.6873	15.8953	7.26115	15.9957	11.7973	12.8297	19.9195	21.3037	15.0041	10.3154	2.93613	9.50517		51.85	42.5535	28.7323	48.253	31.2202	36.4752	10.6733	7.65456	42.7486	27.2236	50.6751		56.9408	51.9512	36.6195	52.1332	17.8569	14.8771	25.5014	30.0187	45.4921	30.9966
57.5		17.5699	17.217	17.9356	16.1026	24.2477	7.27665	6.18243	16.578	8.20565	15.5357	20.6577	22.1152	17.0991	8.0534	7.20312	9.49479		46.411	60.1391	28.6158	33.9648	52.3276	36.0159	8.22845	16.7206	29.7976	20.5241	51.8201		55.6387	48.7691	37.1569	58.0731	36.8771	14.9336	34.4599	29.1616	40.1174	30.2597
58		17.3089	14.9253	9.60683	22.6879	20.7079	-1.34199	5.10371	17.1604	4.61398	18.2417	21.396	22.9266	19.1942	5.79142	11.4701	9.4844		40.3553	40.8219	25.1066	40.7001	38.6872	38.8783	13.7955	9.1778	33.7754	27.7206	54.6256		44.4277	46.0049	37.8477	59.5819	39.0059	21.3949	35.1238	27.4486	33.3648	34.0763
58.5		14.8504	12.3256	9.25694	17.0321	23.6929	8.21592	3.9675	14.2195	7.83546	16.6026	20.7909	23.1969	18.6688	9.85881	10.4977	10.5738		54.5569	52.8927	23.4448	38.1253	31.1247	36.1083	12.6552	17.9044	29.3439	25.9428	56.3648		41.4458	50.1145	47.1773	55.3774	38.9375	20.9773	34.4018	31.051	42.0132	32.5333
59		14.0281	12.173	5.70286	17.7987	23.8338	17.7738	2.83129	11.2786	11.0569	14.9634	20.1858	23.4671	18.1434	13.9262	9.52524	11.6631		48.7641	46.4569	14.8789	44.4945	34.9133	41.3301	13.0368	6.64098	29.1997	26.293	59.6451		42.6428	47.8504	46.6643	56.3066	38.7788	21.5221	34.9072	27.8455	43.6962	32.8067
59.5		17.2357	14.3219	10.0229	19.0513	23.1383	16.697	0.338142	15.0514	13.882	15.8384	21.2232	21.0192	18.8998	13.4258	9.66752	10.4499		43.4021	42.6405	25.8232	37.077	60.6127	46.805	19.2005	16.2435	19.1195	27.042	48.3824		46.5393	47.6873	50.3952	63.3982	27.5697	14.9639	26.2495	27.445	42.9788	35.3569
60		16.1941	14.1169	10.9895	17.625	21.3312	15.6201	-2.15501	18.8242	16.7071	16.7133	22.2605	18.5714	19.6561	12.9253	9.80979	9.23675		36.623	49.5397	26.035	30.9142	45.645	32.13	18.5459	23.6512	24.6218	24.4592	50.003		42.5088	53.2263	42.3957	64.9422	26.071	14.4868	30.7117	27.5889	37.7878	44.7146
60.5		16.735	13.8223	13.0805	17.8748	23.7848	11.2308	-1.37034	16.5933	13.2137	16.9473	21.2482	20.4663	18.8952	10.2143	11.1615	7.21802		41.5515	47.2536	55.5638	22.5478	37.3289	26.9173	23.805	14.5014	23.6811	27.6562	51.8533		42.3641	55.4115	46.5924	61.9012	30.064	15.7533	47.1613	19.5944	41.8967	44.8108
61		17.433	12.3169	12.7725	21.6313	19.4104	6.84146	-0.58567	14.3623	9.72025	17.1812	20.2358	22.3611	18.1342	7.50328	12.5132	5.19929		46.7291	59.6867	45.2758	20.5633	45.277	23.3469	25.2258	11.3224	15.9127	24.5694	38.4911		41.9516	52.1923	48.0239	58.3479	26.5764	14.1455	40.8528	22.5353	39.0281	45.5715
61.5		13.4996	12.5313	6.11579	23.9662	20.0009	10.4858	8.29986	13.902	9.39813	16.687	21.166	21.6578	19.0747	6.85248	11.9298	7.88818		34.9503	61.0729	46.9249	38.1813	39.5524	21.5959	24.4212	9.30393	28.2856	26.5676	43.9539		45.7182	57.8414	29.3405	55.3673	46.1961	16.1663	42.5038	24.6074	48.6188	40.971
62		14.9341	11.1495	11.8949	17.1771	24.7721	14.1302	17.1854	13.4417	9.07602	16.1928	22.0963	20.9545	20.0152	6.20167	11.3464	10.5771		44.8085	54.7273	29.3535	41.4384	38.4578	14.626	27.023	5.02591	32.9352	26.2768	49.5335		41.1082	52.0077	37.9379	55.0896	20.3632	14.9636	36.6337	24.8784	42.2031	45.5463
62.5		14.1899	12.4708	14.8966	24.8405	24.695	14.9492	11.3529	13.5455	2.34206	14.2986	18.3192	20.8427	19.5856	9.72358	12.0686	9.41452		54.3113	64.4888	32.8745	33.0001	41.9589	20.8798	19.4535	13.2236	35.8795	21.396	54.6479		42.7418	49.6561	28.1572	49.5218	29.5298	14.6085	35.8251	16.9752	49.0958	49.2559
63		15.2991	17.0083	14.4352	21.1814	17.1454	15.7682	5.52032	13.6492	-4.39189	12.4043	14.5422	20.7309	19.1559	13.2455	12.7907	8.25198		44.7501	52.8927	31.3021	38.1415	60.7383	28.8143	23.2108	15.1866	27.8539	24.5431	55.5364		45.2811	52.5669	32.3143	44.7974	7.22688	23.4526	35.3221	16.969	54.8271	46.1111
63.5		17.4801	17.4963	15.7513	19.547	19.6142	18.0183	6.65863	13.8398	-0.17837	13.303	16.7957	22.3258	17.7828	10.4579	13.7164	8.9365		40.5174	55.9446	34.1451	43.8816	51.4896	22.5222	24.9281	12.6742	24.1084	24.887	47.9188		44.2735	54.4327	49.3628	48.4428	20.1938	22.7297	44.0747	21.194	57.8403	41.6098
64		21.8085	19.4903	18.1771	16.8543	19.6776	20.2684	7.79694	14.0305	4.03515	14.2017	19.0492	23.9207	16.4098	7.67027	14.6419	9.62102		45.7851	45.9801	30.8012	36.6134	26.8127	17.2047	14.1944	4.0175	30.9851	30.5544	56.741		40.2075	57.2992	48.5566	52.5042	29.1315	19.6828	43.9	23.4171	53.6887	42.8729
64.5		21.3707	14.6937	12.4892	17.3432	20.5477	14.251	16.0099	14.8288	3.04034	14.6979	17.4398	23.6796	18.3007	4.09794	13.229	10.7205		47.1156	35.8782	14.2815	40.0789	31.4586	19.6935	16.8634	1.39993	28.3914	24.0677	58.2383		34.5735	53.517	48.2098	50.91	7.88955	15.3392	42.2786	17.7553	56.7768	35.3543
65		17.5526	12.91	8.82642	15.9897	22.3682	8.2336	24.2228	15.6272	2.04554	15.1941	15.8303	23.4385	20.1917	0.525608	11.816	11.8201		51.9393	34.26	32.7472	39.6554	39.4655	31.6674	17.7937	1.96156	24.8911	32.1731	65.2734		40.6294	52.2743	56.2358	59.6102	23.7867	21.2783	29.7553	16.1381	59.8317	33.7239
65.5		12.8088	15.2589	6.62713	19.5904	24.7798	9.78214	21.8448	17.647	4.39784	16.133	19.8081	22.1668	18.7898	7.26365	11.1782	11.5664		45.9479	70.496	26.4402	50.1318	33.7032	30.895	24.5729	7.09431	27.514	25.644	53.2666		43.6027	46.9742	55.4603	59.7099	31.264	22.595	36.3409	20.2204	75.0961	32.9183
66		11.8678	20.8942	7.96144	18.4864	23.5433	11.3307	19.4668	19.6668	6.75014	17.072	23.7859	20.895	17.388	14.0017	10.5403	11.3128		51.3166	50.8278	21.9073	37.9287	30.9776	31.2473	34.5901	16.421	37.0442	23.212	53.7888		45.1957	45.5649	52.9801	61.9029	39.6044	16.6505	34.7682	19.6481	76.8553	33.4803
66.5		17.7416	23.6259	8.37597	15.3088	22.1301	3.31993	14.5771	18.1954	2.61888	17.2821	24.0279	22.8298	13.6693	12.115	9.65158	8.99793		54.841	49.3404	14.9462	46.896	30.72	28.4841	25.9774	2.36497	34.7809	27.3965	51.6767		42.9613	49.7812	50.1476	65.4836	19.9997	18.0662	38.8255	18.627	77.2025	28.6292
67		17.1227	22.1639	9.66941	18.1989	25.4812	-4.69084	9.6873	16.7239	-1.51238	17.4923	24.2699	24.7647	9.95071	10.2283	8.7629	6.68306		51.8112	28.8392	32.7965	39.6216	28.3988	26.2704	33.2908	3.36117	26.2774	21.8749	46.9786		44.7329	45.0807	46.3279	65.6578	27.1834	16.9571	37.1229	18.3468	76.9879	30.7472
67.5		16.2422	18.0712	8.10226	13.662	21.9269	-2.67321	3.59535	17.5297	3.42885	19.3546	24.069	24.7691	13.4348	7.63327	9.23328	6.83615		49.6459	44.7713	22.3152	39.1659	31.6707	24.3242	25.6228	10.226	28.4821	23.4298	45.5073		41.9224	50.9537	43.9128	65.7537	45.8212	18.0038	38.1332	18.8016	66.3622	26.9404
68		15.1558	20.1152	14.9435	14.0694	23.1038	-0.65558	-2.4966	18.3354	8.37008	21.2169	23.868	24.7735	16.9189	5.03823	9.70365	6.98924		51.0149	48.2199	31.4291	37.4996	36.3087	26.228	25.4405	19.4453	35.3781	31.5647	46.9622		44.1346	46.0081	43.8658	67.8621	24.033	13.173	35.9874	18.6753	53.2098	24.5088
68.5		13.7164	21.1581	12.4749	19.2446	23.2097	3.05184	11.1515	15.7231	4.29431	16.9309	24.6617	24.2722	17.5982	4.36575	10.1808	9.09905		57.2654	44.2767	37.5928	38.2527	41.6902	22.1627	18.7742	-2.77404	37.2338	18.5132	45.8956		34.2456	51.1458	36.8215	73.5983	27.6717	15.3558	37.7854	20.249	51.4334	30.0744
69		17.2144	20.7486	12.2741	15.011	22.9467	6.75925	24.7997	13.1107	0.218539	12.6449	25.4554	23.771	18.2775	3.69326	10.6579	11.2089		54.2799	44.0299	32.2232	37.1092	34.831	22.0975	37.5771	6.57898	34.1033	12.8522	47.7926		43.731	47.1838	36.9479	70.8517	30.9297	12.8393	34.8547	24.2763	54.68	29.3189
69.5		20.1319	19.0659	14.5752	13.2959	25.4876	12.3083	15.3519	14.9456	5.18281	13.9355	21.7327	23.5315	20.1079	4.74096	10.7116	12.3143		55.3348	29.9328	43.1764	39.5074	38.1842	16.6852	41.044	13.6527	38.8432	23.07	51.0622		39.9212	46.3675	36.1289	74.5154	24.3082	12.3139	33.2226	20.3851	61.0425	26.7107
70		19.0018	22.2892	6.57847	14.2453	21.1351	17.8574	5.90409	16.7804	10.1471	15.2261	18.01	23.2921	21.9383	5.78866	10.7652	13.4198		51.0541	36.9781	45.3372	42.2917	43.2228	31.8589	34.46	12.0498	38.7474	19.5872	48.3374		43.0304	47.5121	29.1718	67.878	29.9603	15.7491	37.6263	23.3565	61.0812	28.0733
70.5		16.5484	20.1447	9.7708	14.7827	27.1428	12.6329	10.5313	15.6977	4.08489	15.1549	17.3027	22.0329	15.348	5.22606	12.5015	13.6011		56.7076	41.1662	50.7827	50.2227	39.9108	37.9545	49.0597	19.361	35.1701	22.4327	55.0719		48.143	45.3267	29.9759	62.1006	39.0676	18.2366	38.7873	22.7854	50.3588	25.0318
71		13.0972	22.4348	12.5111	13.5144	22.9342	7.4083	15.1584	14.615	-1.97731	15.0837	16.5954	20.7737	8.75769	4.66347	14.2379	13.7824		45.8021	33.5575	45.8893	45.9149	33.9524	33.6261	36.5987	20.411	30.7857	16.0911	47.595		47.5834	45.2817	31.0023	62.0861	30.6837	18.2014	33.2509	26.4858	59.9842	30.2785
71.5		16.7358	24.1702	10.48	16.1054	22.3728	10.4738	11.3365	17.7694	2.07151	15.467	16.9401	21.8239	11.3837	3.78778	14.4478	13.7247		50.786	53.5128	43.8968	40.6381	39.6754	22.783	24.5724	1.40623	22.2954	20.8081	50.2859		49.0991	42.7395	27.3131	56.6875	43.1611	18.5005	44.4894	22.5524	55.8669	29.291
72		18.7184	21.6178	10.7117	15.8068	25.0347	13.5393	7.51464	20.9238	6.12034	15.8504	17.2848	22.8741	14.0097	2.9121	14.6577	13.6669		49.1469	39.3053	38.5722	48.0213	56.3765	17.5795	29.7138	17.3932	23.623	15.9849	58.1556		46.102	43.0964	31.2928	51.3162	36.2273	19.4556	50.4408	25.1712	57.8274	28.12
72.5		20.4012	19.6741	10.1632	16.6046	23.1375	17.1634	18.5249	16.8567	6.07783	16.7663	19.9173	21.4691	13.0015	6.12564	14.758	13.0854		52.1827	34.7933	19.4892	42.3021	61.4501	28.1673	37.3962	12.8122	35.0286	29.601	54.9754		43.9319	46.0787	30.4146	41.935	45.9027	18.4723	56.7217	27.3325	55.3443	33.3423
73		20.9173	17.679	2.37916	15.8708	23.7749	20.7874	29.5351	12.7897	6.03532	17.6822	22.5498	20.064	11.9932	9.33918	14.8582	12.5039		51.6024	27.608	34.7515	35.209	48.2884	23.3942	25.8382	8.2585	26.0519	22.0583	60.2696		44.9971	43.6597	37.9044	42.8682	60.8596	18.6974	50.939	24.2058	66.9137	31.0158
73.5		15.496	19.5584	7.81874	15.223	25.8033	15.8598	7.76499	15.2001	6.80002	16.297	24.2155	21.3013	12.4709	7.86721	12.5688	13.4558		58.3348	24.8016	35.299	40.6147	57.1658	27.3348	25.7611	8.39646	27.521	22.1424	45.9535		47.6474	44.8983	33.4155	40.9792	46.9431	17.1582	45.8278	27.8369	56.1287	28.094
74		12.1684	18.7588	10.789	16.5177	25.028	10.9322	-14.0051	17.6105	7.56472	14.9117	25.8812	22.5386	12.9485	6.39524	10.2794	14.4076		55.1347	31.2906	52.1971	32.5653	56.0021	40.1061	26.2723	12.8393	32.1472	27.5382	46.368		48.3927	44.4047	36.2446	45.8159	42.8206	25.8719	38.3745	30.7215	64.5615	33.8635
74.5		17.0447	18.5082	6.8523	18.1712	25.5209	9.95332	-3.90691	16.8006	5.94833	12.8816	23.0305	22.7204	15.7378	13.5665	12.8407	12.3962		48.5155	33.6844	39.2488	29.537	47.5951	43.4199	36.2939	13.2433	30.7701	19.8979	42.3726		46.1002	44.0181	33.1078	62.3174	44.1433	25.0731	34.7685	30.0117	61.1437	35.7299
75		20.452	20.4302	4.85695	13.7629	28.0991	8.97439	6.19128	15.9907	4.33195	10.8514	20.1797	22.9023	18.527	20.7377	15.4021	10.3848		52.982	33.8547	34.0211	42.4728	48.5686	53.6101	38.6826	10.9967	32.4961	22.3739	47.7642		42.1952	41.0534	30.8774	55.3024	44.8228	28.6171	47.7068	21.5416	62.2993	30.9446
75.5		18.9431	17.8581	9.67905	16.9777	24.9668	5.90824	15.4027	18.2682	5.14555	11.6777	20.7232	20.6325	16.6483	14.9065	13.533	12.5415		49.0473	23.3576	38.4529	44.9899	35.0895	43.4177	26.6368	-0.604446	34.3183	27.7481	52.058		47.6887	39.0561	37.1244	47.7563	41.9236	28.6502	46.8219	20.8835	55.2314	33.739
76		15.1117	15.4127	11.3611	18.7115	24.7228	2.84209	24.6141	20.5457	5.95916	12.5041	21.2666	18.3626	14.7696	9.07534	11.6639	14.6981		54.6734	29.8769	29.419	38.8768	48.4931	37.6777	36.2576	13.79	26.7254	19.4145	47.7231		49.8121	41.2718	29.6626	47.9923	52.3387	25.8255	48.8667	26.7941	54.184	36.1832
76.5		15.9237	15.5717	3.4437	17.3888	21.5465	8.04263	26.0864	18.4877	8.74741	13.9877	20.6559	20.4429	15.0382	10.0571	10.0542	14.0959		58.5647	20.9239	30.7847	33.1907	34.9595	46.9906	47.6216	18.7019	31.858	22.933	53.5783		51.686	35.5509	31.0823	46.3609	49.4103	25.3854	50.6571	30.6066	70.3897	40.4816
77		16.7628	17.0722	-1.90346	22.0468	23.6926	13.2432	27.5586	16.4296	11.5357	15.4713	20.0452	22.5231	15.3069	11.0389	8.44463	13.4937		57.1871	25.7683	39.38	31.4544	47.5032	34.1197	52.1635	10.9315	33.0852	19.9761	51.0895		48.7989	41.4034	33.9395	56.3166	20.6806	29.0447	51.7811	27.1601	72.404	35.6211
77.5		18.9625	14.803	1.61695	19.6787	23.8143	12.9538	16.6314	15.1974	9.45825	17.2368	16.9	22.4672	17.2941	11.4736	8.16483	14.4727		54.9334	25.7392	47.704	37.376	34.8211	37.9394	48.5387	7.64397	28.1113	23.8667	53.4848		50.7045	43.7215	37.1485	47.7995	35.688	25.107	51.4241	26.6917	70.2695	37.3727
78		20.2655	16.7367	4.50827	19.1613	24.2985	12.6645	5.70423	13.9653	7.38085	19.0023	13.7548	22.4112	19.2814	11.9083	7.88502	15.4517		48.252	33.3547	61.9028	32.9374	62.7225	18.6594	43.5266	7.39134	32.7663	20.5502	51.7008		48.3879	42.0239	35.3044	54.135	23.5669	24.2027	66.8588	29.2125	67.1893	37.0628
78.5		16.6076	18.0673	6.00176	19.7469	22.9097	15.1677	9.10115	13.0723	5.4596	20.7243	17.4191	23.2341	19.9837	9.15941	8.05132	11.4755		44.0487	36.5633	33.8021	51.4197	34.5539	23.329	27.6411	10.3526	33.0521	24.0756	52.1265		46.8578	41.8937	35.7755	46.5758	23.6401	23.3514	76.8665	32.3394	67.3023	35.7651
79		21.0916	14.3189	4.52686	18.6906	24.3549	17.6708	12.4981	12.1792	3.53835	22.4461	21.0833	24.0571	20.686	6.41048	8.21763	7.49922		37.6339	29.4465	46.6659	45.8764	32.9153	18.7132	40.8999	8.68839	33.8614	25.7161	58.1134		45.4214	40.1799	32.2833	51.0245	28.4082	21.1872	65.0582	25.7	70.1038	43.4268
79.5		21.9646	15.2041	6.72911	18.2354	26.0057	11.4451	15.9722	11.2574	3.88106	18.2518	22.0623	24.3381	17.5623	8.05397	10.2356	9.11681		46.186	20.8804	47.1439	36.6697	40.8564	30.3166	34.312	3.73029	33.7935	20.1279	49.0566		37.8933	39.8164	35.6672	56.9496	19.0844	20.8782	57.4742	26.7379	66.7105	39.5528
80		21.189	15.4673	7.49787	19.26	25.6064	5.21948	19.4463	10.3356	4.22378	14.0575	23.0413	24.6192	14.4385	9.69747	12.2537	10.7344		49.0125	42.7875	31.5702	31.6962	39.8268	37.0755	19.6749	12.4604	31.9704	27.5125	43.6467		37.5941	37.4456	33.6153	49.6056	52.1603	21.6863	58.9993	29.5345	73.4909	44.4803
80.5		22.3805	15.3146	13.7369	22.2877	23.0876	9.70009	11.9888	13.2883	-0.3959	17.5494	24.2716	21.9874	15.2658	12.4947	12.5684	10.5129		42.9889	41.1387	31.0724	33.5195	37.2486	37.9114	14.3284	18.1621	43.7798	24.1626	55.0692		31.7724	39.317	27.9802	49.9904	24.7925	14.3236	67.103	30.1462	81.6371	34.8525
81		21.1442	18.7801	5.92934	20.6065	19.2087	14.1807	4.53127	16.2411	-5.01558	21.0412	25.502	19.3557	16.093	15.2919	12.8831	10.2915		44.5575	42.4811	38.2276	38.8366	36.7104	32.2008	16.1423	18.0137	50.6127	25.0756	48.1624		35.9568	42.197	26.7264	54.1697	36.071	17.7744	61.8389	30.3685	86.1608	32.2913
81.5		17.4429	18.9347	10.9669	22.221	24.8361	5.19477	8.40762	17.8258	-0.70959	20.0136	27.696	17.4357	15.8536	14.1132	12.5886	10.8997		44.4362	50.0447	29.5206	58.6716	38.6904	35.6993	21.2656	13.3537	38.2142	22.8031	51.4688		32.0889	43.1693	26.5013	52.4974	21.8912	20.8834	55.1865	21.5143	85.0374	35.3773
82		17.9995	20.8865	7.25497	19.9927	23.5543	-3.79115	12.284	19.4105	3.59641	18.9861	29.8899	15.5157	15.6142	12.9345	12.2942	11.508		50.3854	56.9263	29.279	44.4449	42.5521	38.6289	33.4441	24.9859	32.5197	33.9489	52.3329		29.3294	42.5443	25.6944	54.8567	23.6312	20.924	51.1434	19.9998	89.1861	35.6845
82.5		19.9344	20.9026	4.19111	18.864	26.3433	8.27265	7.30862	18.0572	4.36964	17.3657	26.8119	19.7453	16.011	11.8339	13.2669	10.1319		51.2334	34.718	48.414	41.5668	34.7035	39.5175	21.3867	17.9875	40.5418	18.3895	52.7956		35.9542	44.0643	27.0272	56.9614	39.6544	16.1092	56.3824	22.9905	85.1572	35.4107
83		21.3331	19.3369	7.40682	18.0691	23.0249	20.3364	2.33325	16.7038	5.14287	15.7454	23.7339	23.9749	16.4078	10.7333	14.2396	8.75586		57.1719	41.3161	45.3207	42.8596	36.7013	50.5191	22.9836	14.2707	37.5798	26.336	63.3925		36.921	46.832	30.5894	58.4609	54.3157	14.0252	60.6316	24.9262	81.4224	36.4563
83.5		22.9838	16.7074	9.69402	16.5682	23.4877	9.64776	14.8822	17.2354	6.179	14.6094	23.5902	22.6737	16.4343	9.43642	13.7389	11.3524		50.6136	68.6446	27.1163	58.3428	33.6185	42.3158	25.6991	22.8235	39.3326	22.8253	46.286		34.1017	46.7815	32.9021	58.7835	50.5318	13.5997	55.4135	27.479	84.7476	39.526
84		23.0383	16.8316	5.32995	15.6486	23.656	-1.04094	27.4311	17.767	7.21513	13.4735	23.4465	21.3726	16.4607	8.13951	13.2383	13.949		41.6759	61.8894	28.1799	51.2881	37.696	41.9237	26.4981	20.0982	24.6999	20.9995	55.6686		37.3577	40.5949	32.2115	55.7743	37.101	15.9355	58.8473	26.6725	84.1256	28.3886
84.5		18.2876	14.2614	5.30065	16.166	25.2623	6.81274	22.2486	18.1906	5.52134	13.6097	21.4723	25.7441	20.3245	9.78079	10.9474	12.9513		43.0495	58.171	43.3583	47.2933	30.9228	42.3662	28.4508	14.0962	39.8238	23.9652	43.4503		33.7992	41.2832	33.7344	52.8341	26.5109	17.6596	56.3045	29.5115	96.5194	29.8373
85		18.7521	16.3773	8.20253	15.4501	21.069	14.6664	17.0661	18.6141	3.82755	13.7458	19.4982	30.1156	24.1883	11.4221	8.6565	11.9537		58.037	46.0627	42.4192	46.8509	42.1464	57.744	30.5934	24.8978	36.1249	24.4491	45.0652		34.6763	37.5741	32.2161	52.959	28.9865	18.8866	68.1124	29.4073	90.1768	28.4482
85.5		20.1022	15.5575	3.34451	16.7798	24.5993	11.0897	13.2205	14.9741	2.23879	15.9816	18.5128	30.7348	21.3039	10.6329	11.3771	9.37432		49.2771	53.5913	59.8957	36.4177	23.4715	53.383	34.8425	15.1374	42.3058	22.1893	54.4383		31.4914	40.3337	30.2518	62.8288	50.3086	18.0852	65.5478	29.0342	72.5999	29.8984
86		17.0713	17.4829	6.15245	20.4637	25.2509	7.513	9.37483	11.3339	0.650024	18.2174	17.5273	31.3539	18.4195	9.84364	14.0976	6.79498		65.7422	37.351	36.2982	31.082	23.6151	46.2796	34.3802	18.9083	42.4751	21.6338	43.5009		27.1654	38.753	32.7112	58.4615	63.7817	16.4155	63.2552	24.5178	88.6508	26.3799
86.5		19.6295	17.9053	9.29975	20.1916	24.4742	9.36706	4.18159	12.6732	-3.04446	17.296	23.3546	28.8396	16.9799	7.91801	13	8.58342		50.458	44.7156	53.0238	32.0071	27.2254	45.6828	43.3249	13.2432	46.7047	21.7281	38.7187		28.1793	37.1207	34.5175	54.2894	29.6785	15.158	57.3911	29.0689	91.9954	23.3096
87		17.9741	18.6087	4.49812	21.0799	22.4539	11.2211	-1.01166	14.0124	-6.73895	16.3746	29.1819	26.3254	15.5403	5.99238	11.9023	10.3719		48.9425	50.2087	49.4299	46.8654	32.9306	44.8135	35.9261	23.0968	32.327	19.5462	40.2287		32.4121	41.6654	37.2569	55.9468	58.0675	11.9291	74.1154	24.0219	90.8556	23.3859
87.5		17.0685	17.153	9.34575	21.0748	25.8817	15.2655	4.45601	13.5355	-4.99169	15.261	23.281	24.0619	12.4859	8.55714	11.7663	11.1915		53.0233	36.2995	41.3462	45.6532	45.8498	43.9072	40.7963	9.83502	40.343	19.9302	34.5959		32.2981	40.4265	39.0839	55.2873	40.8579	15.905	63.5284	25.556	100.808	29.8198
88		18.3085	21.8958	10.8484	18.1273	27.3536	19.3098	9.92367	13.0585	-3.24443	14.1474	17.3802	21.7984	9.43148	11.1219	11.6303	12.0112		50.5612	53.5716	48.6213	36.071	33.1263	41.8353	20.8008	13.5059	33.0088	19.2331	41.8202		27.8306	40.5746	34.3564	57.682	29.3311	13.6172	57.4993	24.0698	88.5428	31.431
88.5		20.7836	19.7455	6.02034	17.8076	31.1401	11.1625	14.0462	18.0611	5.89259	18.2425	20.0838	22.2338	9.0937	9.25293	10.962	11.5962		53.0179	53.6833	62.6077	55.3663	25.157	46.9588	19.8009	11.2608	33.7645	19.3514	51.6833		24.8788	40.0954	35.2767	55.7619	46.0924	19.5585	56.6343	23.4292	83.9873	34.1043
89		20.6952	18.4322	9.37057	21.5797	27.5613	3.01515	18.1687	23.0637	15.0296	22.3377	22.7874	22.6692	8.75591	7.38397	10.2937	11.1813		46.6286	27.4888	47.9018	42.7048	35.4895	45.3036	19.6576	17.256	44.5331	22.1481	52.161		27.9708	40.7751	37.8255	65.3965	28.3266	15.4884	55.4058	23.1528	76.0819	36.4462
89.5		22.8094	15.5551	2.88841	19.81	25.5667	13.8687	14.5525	23.971	10.864	18.8522	21.5313	22.569	13.2353	10.2024	7.22757	11.736		44.4514	34.5374	42.0045	43.4101	29.0372	36.2209	17.0831	16.1664	35.3082	22.2889	41.1071		29.1239	39.7935	35.5648	74.1105	32.5387	15.9882	47.9326	27.545	73.0098	41.5639
90		20.4099	18.1153	3.37171	16.9357	27.7461	24.7222	10.9362	24.8782	6.69846	15.3668	20.2751	22.4688	17.7146	13.0208	4.1614	12.2907		47.3545	38.6503	45.6473	44.8825	44.2767	34.3435	39.1417	11.4036	50.0056	18.2926	50.0858		34.0424	38.3681	30.6622	68.4785	37.7543	16.0407	44.2908	22.3244	72.8286	39.0803
90.5		18.3503	17.019	5.68963	20.6642	29.9083	24.1208	9.79725	25.885	7.17494	16.6029	20.3302	22.569	14.908	7.67928	5.14628	12.5189		38.5249	20.2832	62.6278	27.8077	30.7027	32.5573	15.0262	7.92602	51.6238	17.9535	45.0264		32.747	40.978	32.2805	65.5667	27.32	15.4288	46.0136	27.3155	79.7813	40.31
91		20.1646	19.1156	5.62829	21.5821	34.4833	23.5194	8.65827	26.8918	7.65142	17.839	20.3852	22.6692	12.1014	2.3378	6.13116	12.747		32.7882	45.1887	44.4215	52.12	37.3634	42.681	23.4102	6.11054	41.8823	25.494	35.4077		32.8077	44.0623	32.5191	70.3686	29.201	12.9192	45.9777	24.7914	76.0842	37.3925
91.5		21.1191	15.536	2.83105	19.3918	26.9871	19.2284	9.94591	21.1829	5.1355	17.7173	20.9093	21.4271	15.0594	8.79369	9.43379	11.7037		42.5937	24.6278	45.4687	46.3078	25.9096	32.043	17.1248	23.3582	52.5911	20.9338	55.5666		29.8267	45.6333	34.8791	67.7654	31.4159	13.4429	52.3691	24.5022	76.6049	39.4847
92		14.2338	19.7766	5.57389	17.0835	30.3352	14.9374	11.2336	15.4741	2.61959	17.5956	21.4333	20.1849	18.0174	15.2496	12.7364	10.6604		38.8067	39.1505	54.6579	41.4656	33.5096	38.1196	22.2573	13.4739	34.2368	24.9397	59.8385		34.9907	42.5866	34.3539	64.9829	36.9465	14.9656	52.4063	20.1952	66.8077	36.9237
92.5		15.7646	20.9174	11.965	20.9544	31.3514	13.474	15.3461	14.3089	2.57543	18.832	21.3487	23.4162	13.6916	12.7778	14.7342	11.411		35.7165	34.2491	35.7038	42.8623	18.7411	47.7043	20.9495	11.3086	28.8374	26.3405	41.9644		32.8397	38.7924	40.2904	65.7493	16.3839	12.8739	43.4679	28.2803	71.8022	40.6187
93		20.2183	19.4219	9.8803	18.9849	29.0194	12.0107	19.4587	13.1437	2.53126	20.0684	21.2641	26.6474	9.36579	10.306	16.732	12.1616		29.2637	42.9102	41.0816	25.0538	23.4334	45.9547	26.5178	10.4159	29.784	25.3245	45.9607		27.8931	40.3112	35.3007	69.1063	25.6124	13.1527	40.1669	31.7108	83.6054	41.9005
93.5		18.7035	16.8378	8.40985	18.2007	29.2813	3.89396	10.5943	12.2094	0.658629	18.4198	19.1852	25.2727	8.65412	10.8745	15.682	10.8969		37.9398	41.2638	45.2895	45.3997	25.6912	54.4936	14.2727	20.4785	24.1241	30.2474	61.0797		33.3634	49.8584	33.4645	63.9015	24.5756	13.8716	36.715	25.1556	80.8506	45.7854
94		16.9644	20.9831	11.0919	16.7351	31.3702	-4.22276	1.72982	11.275	-1.214	16.7711	17.1063	23.8979	7.94246	11.443	14.6321	9.63225		41.4107	32.8028	58.4233	44.5692	33.5555	39.5287	29.068	16.7865	20.3199	23.8394	54.3404		32.1035	45.6988	29.3951	65.9557	44.1118	16.7181	42.329	29.4073	84.136	43.4499
94.5		15.0007	23.0525	8.91073	18.4789	25.5851	0.505137	9.67079	13.2742	3.05647	19.302	16.8844	26.4481	14.7423	9.30879	13.8129	10.3823		40.4839	26.4154	41.379	48.3322	28.5739	27.6307	28.216	13.0644	26.8587	27.6546	47.2958		29.1793	43.2529	34.3154	67.0826	41.8602	13.7708	44.5181	24.6354	76.9513	46.253
95		16.9437	22.4682	11.8817	17.7098	28.4484	5.23303	17.6118	15.2734	7.32695	21.8329	16.6625	28.9983	21.5422	7.17454	12.9938	11.1323		43.6104	22.1193	43.9428	37.8223	37.3867	45.2361	19.3914	16.595	37.8647	27.5913	54.704		29.8412	42.0209	30.53	68.4552	32.5678	10.359	43.1014	21.0965	88.3288	41.1747
95.5																			34.8405	32.3066	49.1929	34.7415	31.3577	19.8586	22.486	13.9398	24.7876	25.7854	47.3953		31.1769	44.3619	30.4298	63.0515	39.214	10.211	39.3699	21.9097	77.5257	42.2884
96																			43.041	35.7181	36.6293	49.8112	26.7134	25.2394	16.8472	12.5333	29.2174	28.5918	37.0426		27.9256	47.7961	28.3834	58.209	31.73	8.61017	58.0395	25.3458	83.081	40.1008
96.5																			45.4133	33.5537	32.4529	37.4713	23.3888	35.722	23.9188	9.60245	21.8581	28.1441	39.7957		27.8672	43.9938	31.1639	59.3465	54.2911	6.49374	54.4162	21.5275	87.4151	34.904
97																			45.2724	29.5938	53.581	41.9061	15.8518	38.8724	35.3884	15.566	22.7669	25.3271	42.0021		29.9261	40.1481	32.8497	54.1177	34.5674	6.55053	44.9519	23.5462	88.6676	28.4225
97.5																			49.6113	34.1648	52.5637	53.8524	31.0891	31.1131	28.6774	23.7535	24.7986	31.5655	43.6043		25.7312	43.5482	32.0371	57.325	32.9748	3.34958	43.9999	20.2284	92.1807	32.7557
98																			45.3298	33.9439	34.7391	39.5145	21.0804	31.4643	24.0955	15.3847	34.0914	31.8597	44.6212		28.7417	45.8024	29.3321	58.9482	40.6653	11.1559	52.5633	18.9643	89.1848	33.9462
98.5																			43.3181	21.8811	53.2637	51.6879	29.8931	36.8214	26.05	21.5599	24.8736	33.747	49.6984		24.8918	42.8526	34.694	50.9354	31.1867	6.34483	57.2062	19.2669	85.9629	37.9805
99																			54.3311	22.6506	45.999	43.8348	18.4042	27.1196	26.053	17.7588	21.8728	23.9473	44.1062		23.402	49.2806	37.5491	57.7464	40.8491	3.15513	58.0553	16.7387	70.3239	43.085
99.5																			56.9504	20.6401	71.3569	50.5395	27.3732	21.6786	21.8712	10.4749	25.707	27.7676	48.8922		24.4958	49.0698	32.7244	48.6041	37.5703	6.35461	54.951	10.9875	83.9616	44.1349
100																			60.4533	31.7146	25.8882	53.3051	21.3185	23.5557	33.2733	17.0093	27.4258	22.0641	42.9997		19.1613	46.1711	34.9043	45.4601	37.9851	8.29878	55.6511	11.9306	95.3931	51.8908
100.5																			44.0068	31.0702	47.2943	53.6114	23.8172	19.6975	33.5071	6.57892	29.5388	22.3283	48.1464		24.8647	54.83	34.1681	53.3053	44.8713	4.09834	48.7513	13.7827	90.5095	51.3108
101																			36.647	19.64	56.531	51.4336	26.0839	37.4962	27.4796	11.653	31.4983	25.1557	40.4191		27.0431	44.5094	31.3721	56.2554	33.0263	8.59169	51.9022	17.4455	69.3224	54.4224
101.5																			42.7638	18.6372	32.4476	47.261	30.5124	33.37	27.8492	23.3226	29.5762	27.5579	46.6356		29.7316	40.3817	35.3597	52.7035	42.5434	9.58229	68.9325	13.2404	72.9569	54.1331
102																			40.9907	32.9616	37.4364	39.2621	30.5579	36.6774	26.4822	10.0966	27.5352	26.0855	49.9575		33.8057	40.884	35.7403	43.4691	52.278	6.37956	53.6443	17.2501	72.1596	52.958
102.5																			34.9203	24.1312	50.5315	50.8614	29.3483	30.8986	23.9391	5.37669	31.5422	20.9268	51.3656		32.1549	40.6479	32.1172	44.3636	39.2263	9.25746	52.1532	16.4877	64.1028	59.7256
103																			51.393	27.9221	69.2204	50.9417	32.609	18.07	38.5121	13.3073	28.7477	22.8493	55.9906		35.2654	40.2997	32.0711	52.8914	31.9492	9.12426	45.0959	12.8357	72.264	57.3417
103.5																			43.77	41.6911	40.4349	49.3817	38.3958	29.1156	40.6625	5.95504	22.8746	25.0199	54.8598		31.6127	36.2113	32.9433	54.173	25.2138	9.50962	47.2776	18.4031	74.8048	65.2121
104																			45.8193	40.8348	46.8966	45.838	30.9198	44.0605	19.9957	11.7643	21.3381	24.6452	47.1131		34.7957	33.9513	29.8134	54.5535	53.5173	13.0164	41.4515	18.7345	75.5114	59.7978
104.5																			46.3959	50.009	42.2506	44.6575	26.4689	41.6706	16.069	3.97107	27.9229	23.6318	41.6027		34.8388	31.0596	27.8071	54.4624	36.4885	11.1431	53.5053	18.7526	62.5201	59.9822
105																			42.3074	51.1708	27.1354	57.6131	40.2021	40.0557	24.0412	13.1535	30.4365	21.7895	48.2174		35.708	34.9902	26.2246	64.801	38.7663	14.07	37.5897	15.985	68.9922	56.1093
105.5																			44.6988	55.1275	30.3686	66.4944	33.1095	38.4726	24.0458	-0.676799	32.9972	19.7384	46.4781		31.3314	38.2364	27.3347	63.191	45.5234	14.4975	48.5128	17.8529	63.4148	57.1654
106																			47.8373	63.7088	52.5756	57.6492	36.7714	48.6511	37.3454	5.47696	27.0943	25.9475	42.9416		27.0643	39.5849	29.7316	64.8201	14.7345	19.0597	46.0661	22.0352	72.8095	58.7191
106.5																			41.3661	35.9875	58.345	55.9624	22.6556	44.6886	19.0081	11.1494	33.2285	23.5129	37.2882		28.7432	40.3518	28.8841	58.6354	34.0799	15.5564	37.4414	20.7739	65.4211	65.1547
107																			28.2126	48.1041	57.4115	59.5834	31.7816	55.096	19.1046	10.1124	32.7654	25.9398	38.7259		35.0124	44.3616	29.0686	57.3971	32.5284	16.7238	35.2993	17.8682	62.2183	63.5861
107.5																			37.9747	43.4075	46.669	52.1671	34.1708	44.9797	28.1619	16.5075	36.0422	25.6327	41.7494		34.5428	51.7166	26.7804	62.5687	30.5998	14.575	42.1076	15.0242	52.4469	68.616
108																			42.7176	58.9803	42.9655	48.5162	35.1447	37.6742	27.8819	11.5194	41.2117	17.4373	52.9301		32.5118	53.7381	26.8241	63.3994	19.45	10.8774	45.1032	14.6956	49.2587	61.8198
108.5																			29.7957	50.8863	27.3787	56.3751	49.0761	50.5335	20.2278	16.332	28.7065	24.6238	44.9925		37.8846	48.848	27.5437	67.7196	26.2753	10.4685	30.1395	15.6611	56.05	67.2512
109																			48.1772	36.5133	45.7135	42.391	36.7674	41.5236	24.1568	16.0541	41.2538	28.0164	40.9828		31.9341	53.2611	26.1018	72.2581	16.9008	12.8722	24.5502	16.4209	59.586	63.356
109.5																			34.871	50.0962	39.2512	40.5724	30.3391	45.0597	9.66939	5.9139	32.4887	28.9006	43.9929		30.211	46.1114	24.8367	60.2023	15.4257	11.7152	20.9067	13.5328	64.7716	64.5048
110																			41.6459	55.7943	32.1074	62.8519	28.8873	47.1439	23.314	12.3377	22.3572	27.7135	47.8184		37.2151	48.5954	26.5244	62.2774	25.1705	10.8271	30.4073	15.2209	51.2917	61.7933
110.5
111
111.5
112
112.5
113
113.5
114
114.5
115
115.5
116
116.5
117
117.5
118
118.5
119
119.5
120
120.5
121
121.5
122
122.5
123
123.5
124
124.5
125
125.5
126
126.5
127
127.5
128
128.5
129
129.5
130
130.5
131
131.5
132
132.5
133
133.5
134
134.5
135
135.5
136
136.5
137
137.5
138
138.5
139
139.5
140
140.5
141
141.5
142
142.5
143
143.5
144
144.5
145
145.5
146
146.5
147
147.5
148
148.5
149
149.5
150
150.5

## Sheet: Figure 3P
immobile fraction
	unc-33L::GFP	unc-33M::GFP	unc-33 S::GFP
w1	82.6787	53.0334	61.1984
w2	82.7826	59.3852	55.5057
w3	91.5429	60.8327	64.4802
w4	82.3008	57.1234	42.5113
w5	75.7248	64.423	65.3243
w6	89.8019	65.9047	83.8177
w7	90.4091	74.903	55.8188
w8	83.9058	87.4442	75.9367
w9	95.2374	68.0449	32.9989
w10	83.4883	75.6081	61.0666
w11	79.1391	50.4967
w12	76.9161
w13	83.8455
w14	91.0044
w15	88.8885
w16	89.3971

## Sheet: Figure 3Q
time (s)		wild type																	unc-119(ed3)																unc-44(hrt2)
0		0	0	0	0	0	0	0	0	0	0	0	0	0	0	0	0		0	0	0	0	0	0	0	0	0	0	0	0	0	0	0		0	0	0	0	0	0	0	0	0	0	0
0.5		10.0209	7.55626	-0.59083	2.13439	3.00397	-5.34515	8.62543	3.07515	-0.39719	2.78271	-1.71533	6.1483	2.84027	0.178584	3.12867	1.52523		94.1962	26.9867	36.9543	-2.01139	5.72369	1.52445	14.3915	36.6097	18.8791	11.2829	5.66818	-15.9661	9.85647	8.6472	11.6316		1.33497	7.54838	6.9465	16.7634	10.8426	14.4261	16.2212	11.4044	5.20661	5.51834	14.6663
1		5.47141	4.40335	1.64402	2.69963	-0.359486	-10.6903	17.2509	6.15029	-0.79437	5.56542	-3.43066	12.2966	5.68054	0.357167	6.25733	3.05047		94.466	33.0186	59.7336	14.0312	7.28016	0.880935	14.5152	7.80893	23.8906	9.89899	25.6544	-9.68863	15.7076	22.6266	8.20122		2.66995	15.0968	13.893	33.5267	21.6852	28.8522	32.4424	22.8088	10.4132	11.0367	29.3327
1.5		8.73766	9.00709	3.19819	4.45005	3.06584	-7.80786	16.0333	7.01675	2.18768	6.52531	-0.69529	10.9303	3.55463	0.3741	6.17885	4.31508		95.3037	37.5016	62.385	38.4852	7.68093	-4.07791	17.9414	18.1961	25.9491	22.5072	2.25949	0.671522	25.9865	4.73761	10.6085		7.00454	18.8699	22.9477	39.014	28.4773	26.6313	39.5011	27.9411	12.7887	13.7606	37.6345
2		6.57796	12.3132	1.49611	4.58206	5.90616	-4.92542	14.8156	7.88321	5.16973	7.48519	2.04008	9.56401	1.42873	0.391033	6.10037	5.5797		94.5899	31.8693	86.7778	27.6953	12.6236	10.2751	28.3093	13.6753	26.8913	45.3269	28.0654	-16.0063	32.139	36.7803	2.6424		11.3391	22.6431	32.0024	44.5012	35.2694	24.4104	46.5597	33.0733	15.1643	16.4845	45.9363
2.5		11.6749	12.091	2.35704	5.22852	8.57801	-4.05282	20.5151	11.7751	5.42641	9.53586	4.00665	9.20153	4.80288	-1.61396	5.32423	5.78297		94.7625	22.8715	36.92	26.9232	19.4466	26.2381	31.519	25.9081	63.443	66.2895	23.6658	13.8538	24.9429	25.0475	17.1863		14.8382	23.8577	35.2552	52.2561	40.7276	24.1633	46.6701	40.6094	22.9258	22.655	58.5035
3		12.3253	13.3156	3.53433	10.4994	7.13611	-3.18021	26.2146	15.6669	5.68308	11.5865	5.97323	8.83904	8.17702	-3.61895	4.5481	5.98624		95.1239	26.8452	47.9845	12.6899	18.0893	13.2195	25.9248	17.2146	44.3831	50.1998	30.3623	15.716	36.3222	44.4703	39.1024		18.3372	25.0723	38.5081	60.0109	46.1857	23.9161	46.7804	48.1454	30.6873	28.8255	71.0708
3.5		10.677	14.7939	5.86079	6.01444	6.37643	-1.62596	17.6799	13.5226	2.98513	12.366	5.53662	11.1487	11.0099	1.34627	6.85219	8.42454		96.0546	24.4244	36.6737	27.5549	9.78949	12.1323	26.1583	52.2057	32.2285	71.5648	21.025	57.869	41.6635	54.0683	53.3677		25.2989	30.0524	41.7596	53.2188	46.546	22.1111	56.484	49.1213	30.4347	30.2188	71.5226
4		11.2404	12.9031	7.02497	8.85685	13.1072	-0.07171	9.1453	11.3783	0.287184	13.1456	5.10002	13.4583	13.8429	6.31148	9.15627	10.8628		96.0022	29.8026	31.0846	38.789	13.1929	6.78316	34.102	28.8489	49.3785	47.3162	43.6488	48.1325	55.5165	44.4617	10.502		32.2605	35.0324	45.0112	46.4267	46.9064	20.3062	66.1876	50.097	30.1821	31.612	71.9744
4.5		11.1955	6.62864	9.53024	6.58071	14.1197	3.80287	13.9349	11.3904	3.82045	10.8258	4.32911	15.5738	10.9225	1.33502	9.09867	8.92966		95.8661	41.8846	57.8114	36.7678	27.7786	3.22289	46.115	14.3455	66.083	33.6235	24.5812	56.2263	36.3559	20.5839	-14.9492		35.9787	41.7166	43.4422	43.8577	53.5974	19.0187	69.2778	58.4608	36.1604	32.8597	69.9311
5		17.4339	10.7934	2.62818	9.42239	13.0689	7.67744	18.7245	11.4026	7.35372	8.506	3.55819	17.6893	8.00209	-3.64144	9.04107	6.99648		94.2367	50.3423	41.745	16.5334	21.1552	3.02356	44.0523	0.668736	67.6107	58.6835	49.4003	44.8341	43.7454	55.3216	26.3772		39.6968	48.4007	41.8733	41.2887	60.2884	17.7312	72.3679	66.8245	42.1386	34.1073	67.8878
5.5		13.8133	11.7538	8.80423	8.68704	16.4626	-2.20213	26.5965	14.2961	5.10346	9.39002	3.50267	16.4861	8.78288	2.14245	7.60156	9.62203		95.5426	65.9654	56.4971	44.4432	18.5465	22.0936	34.5735	18.0434	60.6222	57.5468	37.4242	24.686	35.4133	65.9982	9.23391		44.3024	46.7817	48.316	46.1702	61.6138	26.0746	68.0009	57.6841	39.084	33.5776	75.6853
6		17.1667	11.6694	7.05546	7.65478	16.1598	-12.0817	34.4684	17.1896	2.85319	10.274	3.44715	15.283	9.56368	7.92635	6.16206	12.2476		95.014	71.545	62.1435	32.2338	20.3284	12.3064	54.8217	12.8066	59.7879	118.983	36.3552	7.3244	42.7537	58.4252	13.5446		48.908	45.1627	54.7588	51.0516	62.9391	34.4179	63.6339	48.5438	36.0294	33.0479	83.4828
6.5		12.3206	11.6043	6.64558	12.8029	15.4555	-2.72412	27.8936	17.6943	0.287183	12.1347	4.25263	16.3626	11.2051	6.77416	8.91427	10.3617		97.2331	39.6193	25.4831	21.1255	30.4616	17.6387	52.2543	31.1609	51.2711	63.8224	27.1545	58.789	31.1227	58.6601	29.7564		58.6881	39.3756	58.5522	53.5588	56.1881	34.2179	63.2509	43.4314	38.5893	36.2733	82.297
7		13.865	11.0438	3.93749	9.46907	15.6812	6.63345	21.3188	18.199	-2.27883	13.9954	5.05812	17.4421	12.8464	5.62197	11.6665	8.47587		96.7293	55.1206	57.225	35.6019	29.8319	10.4943	45.5502	44.8667	58.0325	78.1279	49.3755	62.1145	44.5256	51.6047	40.763		68.4682	33.5886	62.3456	56.0661	49.4372	34.0178	62.8678	38.319	41.1492	39.4987	81.1112
7.5		11.5374	14.1919	5.96985	11.8502	16.617	8.56621	18.8165	15.9622	0.362622	16.0595	6.27601	17.9256	11.1758	4.80967	12.6382	9.81285		94.9398	35.875	20.5992	30.0623	39.3353	22.8105	71.0014	38.8996	54.7031	96.1244	47.6076	35.8753	37.479	72.0124	24.4695		71.4909	38.8987	60.9578	54.9148	52.308	41.2908	64.5964	42.5945	35.7525	39.4782	82.2574
8		11.8471	14.0935	4.31621	12.2477	10.991	10.499	16.3143	13.7254	3.00407	18.1236	7.49391	18.409	9.50516	3.99737	13.61	11.1498		94.9431	50.3312	52	26.1663	30.5921	15.6391	57.2229	23.9166	37.4769	65.2305	57.2454	40.321	32.879	101.022	14.1982		74.5136	44.2088	59.5701	53.7634	55.1788	48.5638	66.3248	46.87	30.3559	39.4577	83.4036
8.5		12.4197	10.5259	7.46061	10.1758	13.5375	11.7143	11.3674	11.8661	0.457542	16.2285	9.37034	18.2751	11.2351	4.801	13.7227	9.94926		94.8976	63.2649	18.6463	48.9605	35.6309	15.6819	36.7135	34.3351	57.5859	81.0317	53.725	44.4656	60.8431	87.7955	16.7504		76.9271	45.5409	59.4983	67.4123	54.6946	59.1789	69.3909	46.0958	28.9591	39.3901	86.9902
9		11.1262	10.4627	2.3944	6.56804	13.0386	12.9296	6.4204	10.0068	-2.08899	14.3334	11.2468	18.1412	12.9651	5.60464	13.8353	8.7487		94.1204	59.013	40.004	51.9665	55.5057	21.1697	41.2278	34.4291	45.1024	109.41	56.8381	57.3412	45.7735	53.4821	13.6795		79.3406	46.873	59.4266	81.0612	54.2104	69.7939	72.4569	45.3217	27.5622	39.3225	90.5768
9.5		11.9871	15.6849	4.28561	8.46826	13.8188	12.7599	2.45101	11.2522	2.10995	14.9206	12.4009	19.3134	11.2347	3.44308	11.6877	9.01553		94.1021	73.2376	45.4977	37.2939	60.3918	15.1162	41.5229	22.0272	40.7819	89.7805	38.5127	105.546	59.3126	72.5565	9.37164		80.4796	50.5175	62.2294	78.1466	71.4365	62.5133	68.3053	46.9515	34.8185	39.809	98.3106
10		11.8744	19.328	1.21437	11.1194	8.88468	12.5903	-1.51838	12.4977	6.30888	15.5077	13.5549	20.4855	9.5043	1.28152	9.5401	9.28237		95.306	66.1372	49.8705	40.4857	43.4408	13.0724	53.1619	23.329	40.2676	100.52	50.8459	138.919	41.9302	82.8048	1.68738		81.6186	54.1621	65.0323	75.2321	88.6625	55.2326	64.1537	48.5813	42.0749	40.2956	106.044
10.5		11.1622	15.1925	3.8714	11.2099	12.4347	16.0143	7.55816	11.765	1.7345	17.523	8.24446	20.7887	9.06616	0.105826	9.20411	10.0427		94.8515	66.1444	28.9159	34.8835	39.8393	14.6675	50.0532	28.962	33.7901	94.366	36.4434	112.074	54.7435	83.0744	3.58097		82.8838	56.3669	64.6143	79.1566	76.928	59.047	68.9318	51.795	39.3021	42.4903	103.709
11		9.36573	13.987	5.25118	10.2698	15.0538	19.4382	16.6347	11.0323	-2.83988	19.5382	2.93399	21.0919	8.62802	-1.06987	8.86812	10.803		96.6115	59.8923	33.6876	31.497	47.5186	26.8237	40.2245	29.9505	36.9151	86.822	30.9508	71.6381	40.8441	80.4999	11.5068		84.149	58.5717	64.1963	83.0811	65.1934	62.8614	73.7099	55.0086	36.5293	44.6851	101.374
11.5		16.4252	13.0163	7.63141	10.6036	19.1696	15.7453	9.25338	15.7092	1.20115	19.5105	10.7618	20.0627	10.0219	-0.05546	11.3945	11.7435		95.8212	53.228	24.0535	51.6499	47.3222	17.4613	45.777	36.0447	40.4894	103.076	44.1997	112.488	59.6176	48.9566	12.0094		86.7274	61.0793	60.9767	85.3263	65.59	64.4452	70.0993	50.6557	30.9897	45.095	103.113
12		17.4428	14.0066	3.74167	10.533	19.3338	12.0525	1.87206	20.3861	5.24217	19.4828	18.5896	19.0334	11.4158	0.958952	13.9209	12.684		95.4205	43.1564	45.384	30.9835	40.9077	34.0993	46.2118	47.1926	36.5934	61.1701	35.0339	103.101	49.7722	35.6439	22.547		89.3058	63.5868	57.7571	87.5714	65.9865	66.0289	66.4887	46.3029	25.4501	45.5048	104.852
12.5		13.5502	15.0757	4.81047	11.6249	20.5071	13.2503	10.1815	16.823	8.27311	17.3587	11.4377	17.6819	12.1019	3.5599	15.3838	11.9191		95.6324	55.9207	35.8711	82.7764	47.0099	19.6463	36.1437	26.1451	24.3752	85.1172	35.1075	88.8353	62.2341	66.1997	1.80395		91.2635	63.8312	61.1708	91.7323	71.7212	60.559	69.9537	55.3521	33.2449	46.7747	117.297
13		18.331	17.3784	4.67722	9.26397	11.7141	14.4482	18.4909	13.26	11.304	15.2345	4.28581	16.3304	12.788	6.16084	16.8467	11.1542		97.975	77.6441	19.0201	55.6405	65.8722	34.4896	57.3363	58.657	14.4049	81.2503	55.7294	131.765	72.4409	55.5242	33.2328		93.2212	64.0756	64.5845	95.8932	77.4559	55.089	73.4186	64.4013	41.0397	48.0447	129.742
13.5		19.4937	12.8669	2.70108	12.2519	13.9852	9.78307	12.5135	11.2208	7.78829	16.7659	8.15869	16.74	12.7263	4.79495	12.6435	12.6183		97.5102	50.9531	12.1646	63.5909	63.5821	35.483	42.0501	60.0613	48.77	61.3982	65.6121	101.81	50.3825	72.655	52.2659		93.8166	65.2793	61.5814	95.8557	67.0237	52.8574	68.5031	61.2467	38.0422	46.1745	126.675
14		9.13031	17.6152	2.39539	11.7454	15.6965	5.11796	6.53612	9.1817	4.27254	18.2974	12.0316	17.1496	12.6645	3.42906	8.44034	14.0823		97.3317	60.4186	80.5498	61.4591	79.7662	29.8502	59.1105	51.4886	47.781	104.528	74.4419	94.5304	29.3191	75.1992	29.5305		94.4121	66.483	58.5783	95.8183	56.5914	50.6257	63.5875	58.0921	35.0447	44.3043	123.608
14.5		13.5199	15.1426	3.21825	10.1002	16.0432	7.71454	11.4701	11.8352	7.32012	17.4217	5.92271	17.1305	13.6043	4.95409	10.6416	12.0377		97.0491	58.1408	59.1633	61.1153	61.147	24.9092	53.777	47.9308	53.6277	70.0815	63.3407	83.2001	48.712	55.6659	29.1398		84.7408	67.3382	49.8124	92.8872	55.7474	54.3895	67.3537	60.55	32.2264	48.8321	115.808
15		13.2572	15.9862	4.22752	11.3939	11.8972	10.3111	16.404	14.4887	10.3677	16.546	-0.18614	17.1115	14.5442	6.47912	12.8429	9.99317		95.9719	66.7709	55.2107	71.9836	78.6043	44.4028	43.667	50.1075	48.5701	76.9456	64.9313	93.0889	51.3996	43.7824	41.2362		75.0696	68.1935	41.0465	89.956	54.9033	58.1533	71.1199	63.0079	29.408	53.36	108.008
15.5		10.5038	11.8697	3.94203	13.3106	17.794	14.1634	6.41418	12.2292	2.67475	15.5284	4.73822	18.6864	10.0009	7.90719	10.829	8.41158		95.558	73.4793	58.752	44.929	76.5003	41.0195	49.0632	33.1589	39.2793	90.6306	55.0029	69.3532	38.9324	57.1422	23.4907		62.7775	66.7689	47.5943	86.8086	45.7913	60.9333	77.6769	53.6868	35.776	51.392	114.44
16		16.6197	13.3963	6.92906	12.78	16.298	18.0157	-3.57566	9.96968	-5.0182	14.5107	9.66258	20.2613	5.45758	9.33526	8.8151	6.82999		94.2572	63.1226	36.001	54.9843	103.499	43.0596	51.166	49.8827	40.9521	105.763	47.6076	55.3375	29.0194	65.9921	33.3316		50.4853	65.3444	54.142	83.6613	36.6793	63.7133	84.2339	44.3658	42.1439	49.424	120.871
16.5		12.1569	14.0953	2.17966	11.541	19.7464	11.3185	4.61435	8.44377	0.645982	15.7578	8.68023	17.7532	8.13987	5.09213	8.65733	8.15781		96.6115	63.4657	59.8959	43.5258	102.725	39.8927	45.4456	69.5755	31.7998	93.642	38.3256	105.484	33.498	70.7918	38.3298		46.804	73.4606	56.9524	80.1003	50.0917	61.3511	95.7681	49.004	43.0114	48.905	126.732
17		11.6458	16.2451	2.63938	13.8002	17.771	4.62135	12.8044	6.91786	6.31016	17.005	7.69788	15.2452	10.8222	0.849004	8.49956	9.48563		96.3793	72.892	49.1816	70.2781	87.6975	38.2104	59.4644	47.2351	28.837	112.536	62.2656	104.526	43.5851	39.1453	64.9396		43.1226	81.5768	59.7628	76.5394	63.5041	58.9888	107.302	53.6423	43.8788	48.386	132.592
17.5		9.01581	16.3752	3.11561	11.5502	19.0404	3.23379	14.6306	11.1977	4.41817	15.6881	8.54632	17.6542	13.317	1.06572	7.47037	8.41197		94.2313	104.27	47.8389	132.435	69.8521	36.2922	45.8561	89.3245	47.3963	108.834	66.3045	118.534	32.8233	40.4739	71.4969		44.0106	71.9238	54.9424	84.8219	59.4302	53.2051	107.681	58.3083	44.9177	48.3487	127.997
18		12.893	13.5505	0.424858	12.3452	23.3443	1.84624	16.4569	15.4776	2.52618	14.3712	9.39476	20.0632	15.8118	1.28243	6.44118	7.33832		96.2245	110.895	47.7493	74.9493	87.1876	35.7701	64.2139	76.4529	41.9582	90.7459	51.9368	154.221	47.3108	56.2814	50.2327		44.8986	62.2708	50.1219	93.1045	55.3562	47.4214	108.059	62.9744	45.9565	48.3114	123.402
18.5		12.9164	15.5435	3.83579	6.30855	20.0228	5.49569	9.77196	12.5855	5.3767	16.0767	11.0573	17.9903	12.2118	0.694295	7.94296	9.40971		95.102	93.6175	66.6369	75.0026	67.9536	50.6407	60.7072	76.2701	41.5514	105.649	47.219	146.851	46.5564	36.595	41.3994		39.8813	57.893	55.0058	76.2958	59.3062	45.6454	106.682	62.878	59.1756	51.3271	124.929
19		10.7282	12.8575	7.99148	15.4751	14.8881	9.14515	3.087	9.6934	8.22721	17.7821	12.7199	15.9175	8.61185	0.106163	9.44473	11.4811		94.8863	87.6811	77.0207	74.8385	62.4893	36.5747	50.3261	40.4084	54.2228	72.04	66.4998	96.8195	55.766	34.3251	40.1912		34.8639	53.5151	59.8898	59.4871	63.2562	43.8693	105.304	62.7815	72.3947	54.3428	126.455
19.5		13.9545	12.663	7.45378	17.4018	18.8111	8.8087	3.82496	9.94337	6.68551	17.2485	10.7096	18.4488	14.05	-0.26195	6.64949	13.0616		95.1712	138.382	118.272	96.1566	42.7535	47.4771	44.2661	79.6891	47.7495	77.9051	83.6562	122.387	49.975	27.1975	55.255		38.4912	54.1399	53.441	59.3771	51.3402	48.1792	110.891	66.1348	77.0286	57.2073	149.014
20		16.8549	14.3575	7.75282	15.2313	19.0138	8.47225	4.56292	10.1933	5.14381	16.7148	8.69922	20.98	19.4882	-0.63007	3.85424	14.6421		95.8252	117.953	86.7778	88.9653	64.6863	41.6341	43.4316	67.6769	85.6718	95.5728	70.9915	88.778	52.5337	45.9386	75.4061		42.1185	54.7646	46.9923	59.2671	39.4242	52.489	116.478	69.488	81.6626	60.0717	171.574
20.5		10.029	20.5471	7.0896	12.6049	21.7941	4.93761	-4.48669	12.1456	4.83853	17.9737	10.6787	20.1328	18.6052	0.803536	7.51399	9.09822		96.8937	119.117	42.2969	99.5516	56.377	40.2054	34.0475	115.027	54.1246	92.6522	65.1328	148.508	49.2324	32.8267	55.2711		54.568	62.2144	49.9663	63.685	35.7463	47.9507	111.337	72.8368	88.1397	58.4947	147.268
21		13.5071	16.6118	5.88543	15.3581	18.7226	1.40297	-13.5363	14.0978	4.53326	19.2327	12.6583	19.2856	17.7222	2.23714	11.1737	3.55432		96.6978	140.224	76.0687	105.709	89.3198	43.5953	50.0957	85.7142	36.1953	84.6	67.1732	155.807	51.2427	46.5259	27.6653		67.0174	69.6642	52.9403	68.1029	32.0684	43.4125	106.195	76.1857	94.6168	56.9176	122.963
21.5		11.8407	21.4581	4.89528	10.228	18.5038	7.49425	-2.60688	12.4784	3.6035	20.2971	13.7925	20.7237	18.9143	3.32719	12.0213	6.51394		94.7146	121.89	78.1685	89.7021	86.3033	46.4697	53.1431	76.4529	57.5984	105.129	84.9632	102.157	46.9264	38.9103	41.5505		61.1672	80.9676	54.7148	69.7793	37.0042	51.8314	115.052	68.3742	97.2408	55.7131	128.37
22		14.863	17.9635	9.59408	11.6285	18.8737	13.5855	8.32255	10.8589	2.67375	21.3615	14.9267	22.1619	20.1063	4.41725	12.8688	9.47355		96.0853	124.364	57.1776	103.262	56.662	34.997	62.1539	72.3783	72.9344	83.717	70.4201	95.4204	45.5836	34.9174	53.771		55.3171	92.271	56.4893	71.4556	41.94	60.2502	123.91	60.5628	99.8647	54.5086	133.778
22.5		14.2177	17.3383	7.90421	10.6128	17.1038	12.9846	6.19843	12.8207	0.21373	18.5411	16.7662	19.9385	18.8583	4.20141	13.7481	9.15111		95.1206	116.828	110.836	83.1202	71.9271	39.8566	69.4045	88.4481	50.5986	78.8604	79.1425	77.5834	47.3	65.9474	40.7534		59.6761	85.9996	56.8818	70.6702	40.1166	56.3758	116.026	68.9384	106.257	56.4041	134.734
23		12.2374	17.2596	12.7256	11.0636	17.36	12.3836	4.07432	14.7825	-2.24629	15.7207	18.6058	17.7151	17.6103	3.98557	14.6274	8.82867		97.2411	137.363	67.2636	90.7644	107.999	56.9664	54.5285	72.2294	53.5936	96.807	62.4201	93.2153	47.9257	48.3903	38.0615		64.0351	79.7281	57.2744	69.8848	38.2932	52.5013	108.142	77.314	112.649	58.2995	135.69
23.5		10.4971	17.3134	14.8626	10.1683	21.8257	21.1222	7.19613	15.6134	6.52721	16.4577	19.1389	19.148	17.1066	4.90777	14.3818	10.2846		96.7445	116.472	34.4117	91.1756	91.6631	52.1876	59.054	72.2739	41.6632	104.679	64.0587	101.886	29.0849	52.6005	51.8371		69.7042	81.2276	58.9454	74.4862	35.1452	59.2313	109.66	76.6276	99.8918	59.95	137.452
24		12.2639	17.308	11.674	14.0038	18.4558	29.8607	10.3179	16.4443	15.3007	17.1947	19.672	20.5808	16.6028	5.82998	14.1361	11.7406		97.2666	84.6899	34.8448	109.1	62.3447	41.3194	68.6737	81.7567	53.9551	150.986	76.2643	160.357	28.7048	47.0326	35.229		75.3734	82.7271	60.6164	79.0876	31.9972	65.9613	111.178	75.9413	87.1348	61.6006	139.215
24.5		9.74238	17.0017	12.785	14.7441	19.785	22.0566	14.0146	15.1803	8.09331	15.9111	15.3182	22.1485	19.0912	6.9898	12.2464	13.5084		96.1642	105.398	50.5371	90.2198	77.7685	39.0428	58.4749	87.1035	61.5108	146.115	55.6478	118.088	39.3753	48.7819	15.2938		72.9563	77.7537	60.2006	81.9986	35.506	66.1451	117.359	79.9611	85.623	62.066	158.141
25		9.8464	16.5765	14.6962	14.4995	17.8489	14.2525	17.7114	13.9164	0.885899	14.6275	10.9644	23.7162	21.5796	8.14963	10.3567	15.2763		97.6279	99.3865	8.06501	121.457	62.3943	38.8059	55.3743	102.804	86.6598	106.562	27.5086	112.043	34.249	54.7699	10.7199		70.5393	72.7803	59.7847	84.9096	39.0148	66.329	123.539	83.981	84.1111	62.5314	177.068
25.5		10.0023	19.7889	18.1878	11.8165	16.3392	10.5684	10.3278	15.8087	1.34983	15.3917	11.9201	23.8619	21.0873	3.38653	11.7044	13.5801		96.0772	102.599	33.4445	81.7449	61.505	33.9158	70.5092	100.39		125.324	47.1771	100.198	25.5237	40.9725	13.8471		64.0106	74.7194	56.6518	75.4612	47.318	67.2565	118.464	73.8441	81.1333	63.7631	161.29
26		7.97945	22.8707	12.5411	11.1409	18.7876	6.88417	2.94422	17.701	1.81377	16.1559	12.8758	24.0076	20.595	-1.37656	13.052	11.884		97.2857	111.046	40.6192	91.6069	67.3027	49.2778	58.3233	102.301		164.115	53.248	89.787	36.3395	50.8193	6.12991		57.4819	76.6585	53.5189	66.0127	55.6213	68.1839	113.388	63.7072	78.1556	64.9948	145.511
26.5		10.0004	24.8135	13.2439	14.1049	17.8804	6.9591	8.87228	17.1089	5.5118	18.4623	13.2504	25.4707	16.9741	4.3592	11.3345	11.6192		97.2957	87.1946	53.0032	99.3368	67.1823	52.9856	55.4393	76.5527		184.629	58.2375	94.4557	25.8133	35.8659	17.4173		58.1182	74.2712	52.8329	73.8638	46.072	75.6155	109.62	62.7926	64.4555	66.4135	152.214
27		14.3093	20.9398	7.90785	12.1699	16.6574	7.03404	14.8003	16.5168	9.20983	20.7686	13.625	26.9338	13.3533	10.095	9.61691	11.3545		99.3102	97.1162	47.2847	112.959	101.649	42.583	55.4891	45.4157		155.163	41.2676	60.392	29.296	41.1249	39.1638		58.7545	71.8838	52.147	81.7149	36.5227	83.0472	105.852	61.8779	50.7554	67.8322	158.917
27.5		14.2913	18.8732	11.0085	16.8097	22.0174	5.45515	4.23907	15.2047	11.2976	20.7388	12.5642	25.7286	15.2359	7.75619	9.07221	13.1114		95.714	104.843	30.6561	76.5875	67.1753	43.4935	75.3042	53.5881		114.46	58.5976	93.6592	33.4138	40.2211	19.3372		67.0923	74.5653	55.1224	86.7607	42.8238	76.3597	111.509	62.4794	55.6239	65.8288	145.084
28		12.5714	17.6501	14.0384	12.1555	22.3595	3.87626	-6.32221	13.8927	13.3854	20.709	11.5033	24.5234	17.1184	5.41741	8.52751	14.8684		95.9214	96.872	15.1789	105.375	65.3907	36.7998	57.8959	78.6469		185.121	44.7559	180.392	30.2812	59.8843	38.4033		75.4301	77.2468	58.0978	91.8064	49.1249	69.6723	117.166	63.081	60.4924	63.8253	131.251
28.5		12.345	15.7841	16.7457	13.9205	27.1285	2.65492	3.11683	15.0675	9.16174	20.0224	9.9004	21.5878	17.4643	2.29141	10.8008	13.2535		95.5386	119.68	35.691	77.0296	78.1424	33.4739	61.864	66.016		139.363	49.1052	147.47	36.1056	72.8056	29.1315		70.3254	73.3693	56.0002	97.7356	46.5602	69.4869	121.541	63.3944	51.2319	61.5759	159.811
29		16.9766	14.5937	13.9489	15.9647	19.1188	1.43359	12.5559	16.2423	4.93808	19.3359	8.29745	18.6522	17.8101	-0.83459	13.0741	11.6387		95.0589	106.168	44.6271	148.124	69.2471	44.2598	57.4974	87.6668		160.468	53.5366	143.513	39.4486	43.4762	51.0682		65.2206	69.4918	53.9026	103.665	43.9956	69.3016	125.916	63.7077	41.9715	59.3265	188.37
29.5		15.8327	15.7892	17.3138	14.5751	22.9159	-2.06436	16.2257	16.8476	6.73583	18.6911	9.343	18.4998	18.6338	2.19962	11.9844	11.6486		94.6555	91.0217	35.6125	64.0922	92.5906	38.764	37.7516	60.2024		138.703	69.9871	182.986	32.1161	27.8303	34.6718		63.9166	64.2798	54.927	94.9166	46.9512	76.3135	134.358	58.3996	51.3648	59.4932	178.513
30		15.6007	20.3251	13.5212	13.6341	19.1025	-5.5623	19.8955	17.4529	8.53359	18.0463	10.3885	18.3473	19.4574	5.23383	10.8947	11.6585		95.9759	82.6262	50.1886	126.813	83.2361	44.5037	49.2588	54.5128		165.227	79.0691	182.164	39.1062	24.8583	67.1129		62.6127	59.0677	55.9515	86.1685	49.9068	83.3254	142.8	53.0915	60.7582	59.66	168.655
30.5		18.3428	17.4516	10.5267	17.1763	15.9198	4.94602	18.3471	15.9451	6.81537	20.1176	10.101	21.3726	19.7456	7.65006	10.0842	13.3942		94.7452	95.1882	26.9625	120.969	92.05	41.1897	47.338	74.5965		187.883	80.9964	146.976	34.0641	16.2655	45.244		71.1994	56.9336	59.2215	99.486	50.0115	76.5949	143.321	54.7911	62.2211	57.4531	158.17
31		12.6064	14.307	10.7092	18.9643	22.7016	15.4543	16.7987	14.4373	5.09714	22.1887	9.81348	24.398	20.0338	10.0663	9.27382	15.1299		96.8499	90.8688	39.1268	151.085	59.8412	38.1853	55.5037	57.287		105.289	93.8405	214.365	35.2582	39.5209	53.4096		79.7861	54.7995	62.4916	112.803	50.1161	69.8643	143.842	56.4908	63.6841	55.2462	147.685
31.5		18.9759	21.9778	15.1329	15.8059	22.9538	10.0942	14.5965	13.9486	7.85528	19.1195	8.34832	21.6076	16.5265	6.6502	11.1632	14.3072		94.7918	92.4015	58.11	92.1445	64.653	52.2529	51.2957	52.0262		131.292	88.0108	198.136	24.6251	33.9184	48.1031		76.242	62.8696	63.6624	103.041	40.8196	75.0409	143.689	59.7045	71.9623	56.6434	152.203
32		12.1263	17.8231	13.6615	16.718	20.0891	4.73398	12.3944	13.4599	10.6134	16.0502	6.88315	18.8172	13.0193	3.23409	13.0527	13.4846		94.5988	72.344	39.8332	64.7558	66.8321	48.2342	62.876	82.069		123.308	91.8561	163.958	21.8786	43.6277	73.9606		72.6978	70.9396	64.8333	93.2794	31.5232	80.2174	143.535	62.9182	80.2404	58.0405	156.721
32.5		13.2525	18.4065	13.9903	15.0459	22.7149	1.0205	3.38979	14.8785	4.87894	18.493	9.64836	20.3914	14.176	1.27202	12.3175	13.0259		93.7885	101.275	46.8623	83.8079	98.2837	54.812	52.1874	61.3986		147.703	74.5957	180.1	32.9312	64.8825	74.4749		80.106	58.2381	61.1128	86.7025	46.2657	78.8988	137.183	63.6411	75.6475	58.3121	157.206
33		15.6096	15.4293	13.4628	10.7974	21.3878	-2.69298	-5.61479	16.2972	-0.85555	20.9358	12.4136	21.9656	15.3327	-0.69006	11.5824	12.5671		94.6288	102.829	90.104	143.118	69.4168	45.9224	61.7267	66.3327		101.793	71.1285	151.404	27.7859	78.5268	48.4162		87.5142	45.5366	57.3924	80.1257	61.0083	77.5802	130.83	64.364	71.0546	58.5837	157.69
33.5		16.9286	17.1651	10.5098	12.9616	20.9524	1.90993	-0.73692	15.2026	5.11665	19.1701	10.574	19.7309	17.5018	1.23936	10.4807	12.1433		94.9099	94.7083	44.9616	84.8937	104.62	37.2925	40.5822	68.3912		138.64	52.938	196.675	33.6946	88.6342	46.4128		93.0643	50.4954	61.3892	104.821	60.3752	77.2267	125.681	68.12	66.2953	59.7999	164.149
34		13.9554	16.16	11.1984	15.6567	20.6106	6.51284	4.14095	14.1081	11.0888	17.4045	8.73447	17.4962	19.6709	3.16877	9.379	11.7196		95.2016	83.0352	72.1421	122.064	80.2273	28.5822	35.785	64.7698		110.404	73.0492	152.095	37.1817	96.9278	66.7057		98.6143	55.4542	65.3861	129.516	59.7421	76.8732	120.531	71.876	61.5361	61.0161	170.609
34.5		18.4563	17.6164	11.5676	13.8186	21.9145	6.95084	2.6635	15.1735	6.83139	13.9802	14.269	18.518	15.2551	6.07369	10.2531	13.9343		94.3573	84.975	57.2379	88.7743	125.551	42.3684	49.0244	53.6317		130.854	43.6007	154.267	22.8192	53.1395	69.6146		80.5271	53.0048	61.3777	112.134	59.3164	75.3798	116.703	69.3598	51.8249	62.732	147.88
35		17.4051	13.8406	12.1796	10.6248	20.6163	7.38885	1.18605	16.2389	2.57395	10.5558	19.8035	19.5398	10.8394	8.97862	11.1272	16.1491		95.3251	105.23	55.1781	69.4569	111.928	46.4581	56.6958	40.8114		130.327	77.6233	112.688	27.0996	85.4585	66.1859		62.4399	50.5554	57.3693	94.7521	58.8907	73.8863	112.875	66.8435	42.1137	64.4479	125.151
35.5		15.7144	17.0646	12.0128	12.114	21.2884	3.63052	1.12811	18.5794	3.92848	13.0054	19.4463	22.568	10.0462	8.87038	5.89895	12.1855		92.8446	105.778	60.0518	71.6992	99.6944	43.018	49.3773	59.2743		107.384	47.6616	150.389	21.3172	93.1823	65.1731		61.3992	47.8331	52.9183	108.958	63.0864	70.2746	110.656	67.3633	44.4136	64.5601	130.02
36		17.878	11.4318	11.0015	12.5831	21.7191	-0.12781	1.07017	20.92	5.28301	15.455	19.0891	25.5962	9.253	8.76215	0.670704	8.22199		94.8055	91.9737	52.2442	66.212	101.353	39.8737	56.1786	92.8471		160.938	85.2365	135.906	44.0799	98.5726	63.3411		60.3584	45.1108	48.4674	123.165	67.282	66.6628	108.436	67.8832	46.7135	64.6723	134.889
36.5		15.4835	14.4819	11.3341	15.0963	14.8347	0.566722	11.6516	19.457	4.28891	15.6037	18.356	24.2732	11.5438	10.8856	6.29282	10.0699		95.3358	113.159	51.4083	64.2559	105.069	44.0818	57.695	53.6386		153.75	50.6324	187.238	34.9766	87.3171	29.1398		51.0732	46.615	55.3085	120.851	69.177	61.1483	123.556	62.7733	49.0146	64.4426	129.692
37		12.9146	17.9289	7.66733	16.7493	16.0622	1.26125	22.2331	17.9939	3.29481	15.7524	17.6229	22.9502	13.8345	13.009	11.9149	11.9177		95.4739	89.655	81.0756	67.0631	109.112	35.6041	52.4459	90.2824		99.2234	53.2276	141.948	31.7963	130.415	28.8642		41.788	48.1193	62.1496	118.537	71.072	55.6338	138.675	57.6635	51.3157	64.2129	124.494
37.5		11.0324	12.7078	11.9709	14.4469	21.512	6.63161	23.0197	14.838	3.89418	14.9401	11.7487	21.9147	16.93	8.36669	8.49241	10.4892		94.8745	169.727	95.7019	72.0018	87.4096	54.7961	59.0959	69.2586		145.359	53.7879	112.645	25.0476	85.6054	37.654		48.5684	48.2109	63.0715	127.662	69.7101	63.8674	135.889	58.9378	50.2739	64.064	135.179
38		10.3641	10.9733	11.3615	17.0656	20.8077	12.002	23.8064	11.682	4.49354	14.1279	5.87455	20.8791	20.0256	3.72439	5.06989	9.06061		95.6149	144.401	49.8467	109.1	106.393	42.8323	54.7035	64.6017		141.549	55.8796	157.011	29.626	70.3652	32.2372		55.3488	48.3025	63.9935	136.787	68.3483	72.1009	133.103	60.2122	49.232	63.9151	145.864
38.5		15.5541	14.3951	12.5215	15.2895	18.8323	6.40175	12.2167	14.6028	3.06089	15.438	8.25019	20.3597	12.5172	7.04034	6.66811	9.95988		96.3345	121.585	88.4222	98.2486	119.423	53.9349	48.4994	39.4159		151.806	79.7152	162.603	27.6058	90.4769	50.4154		46.139	44.8338	63.4773	142.018	69.4797	81.7271	124.842	56.672	47.5984	62.5724	158.01
39		15.8543	12.0433	11.8426	13.2081	17.7491	0.80153	0.626983	17.5237	1.62824	16.7481	10.6258	19.8403	5.00876	10.3563	8.26634	10.8592		96.9424	120.412	68.8284	85.7181	95.7279	55.8367	36.8688	44.8667		169.474	69.5388	179.476	30.8199	99.304	78.2717		36.9292	41.3651	62.9612	147.249	70.6111	91.3532	116.582	53.1318	45.9648	61.2296	170.156
39.5		14.7788	10.3882	11.5366	12.9206	21.1143	5.74142	11.1174	17.9557	2.02788	16.6937	15.1535	21.3022	7.34338	7.88917	12.0976	14.2589		96.0704	132.392	68.1506	90.1822	110.239	57.71	55.805	38.2962		147.047	98.2345	161.399	32.4028	79.758	54.0702		45.9947	50.8039	68.4192	152.092	77.4329	89.9538	119.462	52.0048	46.131	62.1494	175.791
40		11.4158	12.4217	6.59273	14.7073	21.7521	10.6813	21.6078	18.3878	2.42753	16.6392	19.6812	22.7642	9.678	5.42203	15.9288	17.6585		96.1246	144.701	43.5071	142.884	82.8306	47.2244	49.8253	47.6421		90.695	73.6796	162.292	24.7809	46.1301	29.2972		55.0601	60.2427	73.8771	156.935	84.2547	88.5543	122.342	50.8777	46.2971	63.0692	181.426
40.5		12.6879	13.9603	7.87248	10.6275	17.0438	6.86032	14.8724	19.0059	6.55745	14.2905	19.7543	21.5066	13.3968	4.24077	18.1768	16.1201		96.3226	123.952	51.7795	99.9176	77.0478	55.6141	40.7026	45.489		145.734	70.9915	135.871	35.2132	50.2486	42.636		54.7859	59.9722	69.3903	146.991	86.2201	75.9408	124.866	48.7815	47.2442	65.0282	173.932
41		15.3479	15.1142	7.85392	17.8141	20.2061	3.03933	8.13684	19.624	10.6874	11.9418	19.8273	20.2489	17.1157	3.05951	20.4249	14.5817		96.4976	91.8889	37.9922	114.163	94.8356	66.1369	41.549	59.4205		133.082	90.5927	125.2	43.8984	50.1909	68.4709		54.5117	59.7017	64.9034	137.047	88.1856	63.3274	127.39	46.6853	48.1912	66.9871	166.438
41.5		12.0562	16.5735	9.44854	15.3633	17.5378	2.37012	9.07864	17.4734	9.37418	12.6108	17.1149	20.3716	14.7217	3.68545	18.4704	12.0844		96.4149	113.003	51.7132	124.222	92.5644	54.9449	43.0393	55.4858		145.056	72.6229	168.526	55.5767	66.433	48.7291		68.8378	57.5767	69.5993	131.192	98.7627	68.1283	126.53	53.7556	46.7252	69.2376	165.024
42		13.6153	14.1727	5.97888	15.4366	20.1503	1.7009	10.0205	15.3228	8.06097	13.2798	14.4025	20.4943	12.3277	4.31139	16.516	9.58714		98.0771	108.598	96.3227	139.171	96.5488	53.9156	47.9357	40.7713		130.673	73.3987	146.948	45.2296	66.238	91.3373		83.1638	55.4516	74.2953	125.337	109.34	72.9293	125.671	60.8258	45.2591	71.488	163.61
42.5		14.5192	13.1111	7.68188	16.415	22.5232	11.7143	20.6344	15.9765	6.29201	15.0258	11.8141	21.8876	13.8026	7.84921	12.489	9.57129		95.6826	89.7734	78.7214	151.296	71.5516	72.4093	54.6829	40.7411		99.4067	100.291	112.907	34.8655	76.687	46.1372		79.4758	55.1883	70.325	123.401	104.634	73.3259	138.058	56.5056	43.5707	69.3187	166.794
43		15.1907	14.2706	7.17014	14.5448	21.1853	21.7277	31.2483	16.6301	4.52304	16.7719	9.22563	23.2809	15.2775	11.387	8.46197	9.55544		96.7139	87.6548	104.411	126.251	87.9974	56.521	59.1566	84.6383		87.9331	102.888	75.114	36.4995	79.6227	56.1369		75.7876	54.9249	66.3548	121.466	99.9277	73.7226	150.446	52.1853	41.8822	67.1495	169.978
43.5		14.3325	17.1425	2.59264	13.7739	26.4454	24.8145	23.2587	15.6166	6.40638	15.3015	11.5188	22.0439	15.9998	11.0602	12.1875	12.4842		95.8806	106.21	46.6478	85.2815	83.5474	53.7147	45.9436	62.9049		119.356	93.3396	68.0973	32.474	90.0159	50.3232		80.3134	63.8843	68.8063	112.243	89.2212	86.6848	143.472	54.191	48.2413	71.0417	165.691
44		12.8858	17.9796	4.18042	13.0506	24.8816	27.9012	15.269	14.6031	8.28971	13.8311	13.812	20.8068	16.7221	10.7333	15.9131	15.413		94.276	131.786	83.8796	64.2097	77.2514	70.2158	45.9601	77.1178		93.3057	92.3061	56.7121	44.8041	92.5161	38.9797		84.8391	72.8436	71.2578	103.019	78.5147	99.6471	136.498	56.1966	54.6005	74.9338	161.405
44.5		13.6025	14.9218	6.53251	15.6731	26.134	18.9487	15.3917	15.579	6.52882	17.2379	13.7899	20.4811	13.1723	10.3369	13.9921	12.645		96.0893	84.9125	90.7333	121.1	91.9464	64.1054	41.5327	81.4504		102.572	57.823	66.6574	28.9818	92.4084	53.7988		91.9444	70.3148	72.5987	107.882	101.116	81.4513	133.069	54.3916	51.7395	74.4324	159.072
45		14.7395	14.5184	10.2911	15.9434	25.6198	9.99624	15.5144	16.5548	4.76793	20.6446	13.7678	20.1554	9.6224	9.94044	12.0711	9.87699		95.5614	98.9077	88.1205	113.539	93.9791	57.9439	47.8122	73.1619		81.8688	90.5764	66.022	52.0577	88.9731	38.0557		99.0498	67.786	73.9396	112.745	123.717	63.2554	129.639	52.5866	48.8786	73.9309	156.74
45.5		15.0293	10.939	11.5288	14.4918	20.0461	9.70772	10.8127	17.9425	2.47857	17.8872	15.9529	20.635	10.9315	13.9109	9.89194	10.7246		95.0533	90.496	54.5297	108.858	80.8992	51.1842	45.3975	75.9187		97.5311	99.6843	77.454	44.7416	96.8377	44.0522		84.5595	72.9826	75.9936	109.492	99.2739	70.4992	129.561	56.5557	54.5679	74.1246	145.644
46		14.0349	12.4733	10.6226	16.3878	22.8608	9.4192	6.11108	19.3302	0.189203	15.1298	18.138	21.1147	12.2407	17.8813	7.71279	11.5722		97.7273	93.2414	61.7595	131.593	88.6621	51.1807	49.2096	58.9181		97.5936	103.141	96.3177	43.3303	87.8537	53.7515		70.0693	78.1792	78.0477	106.24	74.8306	77.7429	129.484	60.5247	60.2572	74.3183	134.548
46.5		16.9156	10.6495	8.04816	14.3122	22.5093	7.36535	9.11569	16.3836	0.73688	15.4915	18.3884	18.791	12.9513	14.0955	8.81519	10.7111		97.9534	88.3367	94.6464	98.5832	70.2671	60.0036	46.8081	53.5881		81.8597	77.5198	80.5604	24.2534	77.0395	40.0411		68.6319	75.1475	87.2803	119.09	92.1095	79.7638	134.115	60.6636	56.6938	71.4148	140.6
47		15.8951	15.1789	12.9823	20.5151	21.8712	5.31151	12.1203	13.4369	1.28456	15.8531	18.6387	16.4673	13.6618	10.3097	9.91758	9.85006		96.2827	87.8616	69.215	94.9479	69.3494	56.285	64.9217	69.1077		86.8843	60.0302	65.2006	27.7979	69.6316	44.8442		67.1945	72.1157	96.513	131.941	109.388	81.7846	138.747	60.8025	53.1304	68.5114	146.651
47.5		14.3036	15.5379	10.5539	15.4371	22.3831	7.94175	9.71177	15.0677	2.56848	18.8996	19.5292	18.4662	13.3084	9.77152	11.1955	10.8269		95.2521	103.603	65.8697	68.263	52.6886	49.6316	63.6763	70.0229		75.4502	91.3688	72.1684	23.5738	62.3133	32.0889		74.6147	66.5845	91.7481	125.317	123.913	76.9955	138.98	61.2263	57.1522	67.8545	144.585
48		17.7205	13.4213	6.89402	15.6244	23.986	10.572	7.30326	16.6984	3.85241	21.9461	20.4197	20.465	12.9549	9.2333	12.4735	11.8036		96.173	91.538	85.2689	54.5624	57.2849	56.2833	61.4382	64.9216		97.5696	70.1045	63.6384	19.5648	60.2573			82.0349	61.0532	86.9834	118.694	138.437	72.2065	139.214	61.65	61.174	67.1976	142.52
48.5		16.2464	17.1743	7.7149	16.565	26.1325	16.368	8.63076	17.1595	5.23354	20.254	18.1807	16.3808	16.0217	6.58945	11.8581	11.0104		96.6115	94.5924	83.99	86.8745	81.2731	62.9293	50.6079	71.9963		61.2959	81.5845	88.6762	37.8363	34.8751			86.8346	66.06	85.6687	115.67	136.939	73.0708	129.556	56.5789	59.6047	71.2883	146.923
49		14.1599	15.7861	7.64715	14.706	24.4387	22.164	9.95827	17.6206	6.61467	18.5619	15.9418	12.2966	19.0885	3.9456	11.2427	10.2172		98.069	76.2307	64.4758	108.858	61.9339	52.9166	44.7903	75.1992		76.0721	69.0741	41.2811	42.4925	47.8128			91.6343	71.0668	84.3541	112.647	135.442	73.935	119.899	51.5077	58.0354	75.3791	151.326
49.5		13.5096	19.8032	8.23932	16.9457	23.5493	23.939	8.97203	16.9911	4.4554	17.8444	14.9105	17.7335	17.3131	7.01444	12.0465	10.4452		96.8616	88.4931	77.7114	139.803	68.3649	71.6451	47.6166	104.916		121.147	99.8266	54.7122	28.2776	60.0787			86.4386	70.589	90.3615	124.262	129.524	74.8757	114.751	52.6863	49.2739	74.3428	160.03
50		15.5188	17.0686	5.68573	12.7926	22.5084	25.7139	7.9858	16.3617	2.29612	17.127	13.8793	23.1703	15.5376	10.0833	12.8504	10.6731		93.7393	73.3751	62.1282	109.126	58.5621	58.1558	46.6811	87.8849		105.431	95.7134	91.201	30.4559	68.3902			81.2428	70.1111	96.3689	135.878	123.605	75.8164	109.603	53.865	40.5125	73.3066	168.735
50.5		16.7681	13.6632	3.80331	17.3188	24.8886	19.8928	12.0207	16.0501	2.92457	17.2125	15.9536	23.9167	14.7335	8.55516	10.4028	9.4405		95.9071	90.9234	50.5243	81.5306	86.5993	56.5059	49.1621	78.4902		68.0476	95.8417	69.3622	57.7978	80.7557			92.1296	73.4694	91.7247	118.975	148.602	72.8258	115.517	49.0297	45.2049	74.1145	152.211
51		14.1968	14.9333	6.35038	16.2244	25.5934	14.0716	16.0556	15.7386	3.55302	17.298	18.028	24.663	13.9294	7.02705	7.95513	8.20792		96.9134	103.79	78.7947	82.4625	78.7748	66.9069	47.5922	84.7546		118.983		61.4892	58.3464	94.555			103.016	76.8277	87.0805	102.072	173.599	69.8352	121.432	44.1945	49.8973	74.9223	135.687
51.5		13.3252	10.6757	8.8032	14.8415	22.4959	9.16598	4.08233	14.598	2.83434	17.2009	20.7346	22.452	15.309	4.68563	9.98694	8.00288		97.0685	97.8127	96.2201	79.3873	80.5593	76.7642	49.973	73.8401		84.8282		79.0792	54.4947	131.59			85.2842	72.0579	79.9765	94.9987	143.086	59.5132	131.514	48.1141	48.6938	72.3326	143.123
52		12.7508	11.8857	13.676	11.2297	20.0472	4.26035	-7.89096	13.4574	2.11566	17.1038	23.4411	20.241	16.6885	2.34421	12.0188	7.79784		98.3205	90.9584	76.5328	98.9269	111.111	75.3415	57.6926	90.714		92.8421		79.7586	35.2148	119.838			67.552	67.2881	72.8725	87.9254	112.573	49.1911	141.596	52.0337	47.4903	69.7429	150.56
52.5		14.9286	12.7553	6.40416	13.252	23.2099	-0.64649	6.90052	13.7658	0.170691	16.7192	23.0438	20.5978	17.9732	2.76268	10.1276	8.4016		98.8416	78.1495	82.2041	80.8828	89.5516	76.3813	42.18	100.14		138.104		79.5014	37.2255	156.486			76.6399	65.5947	73.4642	87.2979	92.7899	51.5454	126.68	47.8489	55.7269	70.6835	139.789
53		12.5435	13.8894	7.629	15.5687	24.3043	-5.55332	21.692	14.0742	-1.77428	16.3345	22.6464	20.9545	19.2579	3.18115	8.23656	9.00537		97.2824	84.3134	77.3354	119.337	85.5179	74.1979	35.9636	94.0618		137.411		49.821	48.8968	117.852			85.7277	63.9014	74.0559	86.6703	73.0067	53.8998	111.764	43.6641	63.9634	71.6242	129.018
53.5		13.3681	17.1434	9.64763	12.9667	22.4479	-2.73023	5.91551	13.5659	2.9236	16.3546	20.0174	23.6847	16.9435	6.37185	10.6598	7.99824		98.5183	101.951	89.9252	98.6682	65.2169	79.6417	43.667	75.493		150.49		64.3919	36.5721	117.07			77.9954	72.1991	81.6148	88.9046	79.6557	61.3641	120.248	48.6252	57.271	72.8631	128.062
54		11.069	12.6682	3.80675	17.1274	27.7624	0.092863	-9.86098	13.0576	7.62149	16.3746	17.3883	26.4149	14.6292	9.56255	13.0831	6.99112		96.6473	99.6184	64.9084	96.8136	73.5479	70.8908	52.2819	79.7143		84.5191		69.1603	33.2411	155.007			70.2631	80.4968	89.1737	91.1388	86.3046	68.8285	128.731	53.5863	50.5786	74.102	127.106
54.5		19.7172	16.4534	6.96912	16.3942	22.0216	4.68609	-6.36524	15.4656	8.81134	16.2699	21.0534	27.0086	17.1686	9.45733	11.2229	7.18754		99.432	99.2842	42.9959	73.4931	62.3021	74.6165	71.6541	90.3625		113.855		86.5058	41.0881	123.643			76.3987	84.6433	85.4366	85.5692	91.0698	65.8334	128.84	56.8453	46.7956	76.297	126.95
55		13.3984	14.3691	3.52002	17.6033	26.5499	9.27931	-2.8695	17.8736	10.0012	16.1652	24.7186	27.6022	19.7081	9.35211	9.36267	7.38396		97.635	99.3528	73.249	97.5097	75.0074	62.4508	69.2961	64.8734		100.4		107.014	45.3329	105.38			82.5342	88.7898	81.6996	79.9995	95.8349	62.8383	128.949	60.1043	43.0127	78.492	126.794
55.5		17.0141	14.8984	4.00924	15.0541	20.4448	7.24041	-6.84225	17.9961	7.93452	16.9029	21.3814	27.1346	17.7821	9.99472	8.04387	9.08564		98.768	79.0408	84.0163	43.7864	60.6523	79.9946	80.5327	68.7539		117.225		75.7045	39.6592	106.405			83.867	103.732	88.4567	91.2166	89.6663	54.6274	138.694	58.1451	44.1684	77.6489	147.074
56		15.3416	12.5888	5.8279	14.8953	23.4527	5.20152	-10.815	18.1186	5.86786	17.6406	18.0441	26.667	15.856	10.6373	6.72506	10.7873		95.6376	87.1127	77.1127	64.5453	83.783	82.5754	71.422	77.3263		93.8622		55.9235	44.8385	121.524			85.1997	118.674	95.2138	102.434	83.4977	46.4164	148.44	56.1859	45.3242	76.8058	167.353
56.5		10.3541	14.2311	9.06623	17.9895	16.8209	10.5484	-1.77693	17.0572	8.83259	15.2351	18.9818	23.9854	15.43	10.4764	4.8306	10.1463		99.9541	90.6414	62.6531	97.6056	55.4385	72.1078	76.4882	75.234		130.233		102.758	53.4789	108.281			79.7438	105.751	96.0471	102.616	85.901	53.6141	140.375	61.1324	53.9849	72.5923	162.09
57		13.4378	19.7955	16.0494	13.786	20.6873	15.8953	7.26115	15.9957	11.7973	12.8297	19.9195	21.3037	15.0041	10.3154	2.93613	9.50517		99.376	122.906	102.023			67.5687				115.594		81.8638	45.4989	87.3987			74.288	92.8281	96.8804	102.798	88.3043	60.8118	132.31	66.0788	62.6456	68.3788	156.827
57.5		17.5699	17.217	17.9356	16.1026	24.2477	7.27665	6.18243	16.578	8.20565	15.5357	20.6577	22.1152	17.0991	8.0534	7.20312	9.49479		98.6584	117.695	70.8379			71.8987				153.565		92.5626	51.1929	76.034			96.8232	100.448	84.6975	105.944	94.4455	61.1311	132.439	63.7068	56.7681	66.3483	147.139
58		17.3089	14.9253	9.60683	22.6879	20.7079	-1.34199	5.10371	17.1604	4.61398	18.2417	21.396	22.9266	19.1942	5.79142	11.4701	9.4844		98.3875	106.998	111.412			68.7399				165.209		58.5617	55.8428	100.968			119.358	108.067	72.5145	109.09	100.587	61.4503	132.567	61.3349	50.8907	64.3178	137.451
58.5		14.8504	12.3256	9.25694	17.0321	23.6929	8.21592	3.9675	14.2195	7.83546	16.6026	20.7909	23.1969	18.6688	9.85881	10.4977	10.5738		100.538	88.5674	70.35			72.7288				145.957		72.7909	43.1198	111.384			118.429	111.083	74.5017	97.4009	107.962	71.0912	134.559	64.7241	52.2424	62.3467	141.732
59		14.0281	12.173	5.70286	17.7987	23.8338	17.7738	2.83129	11.2786	11.0569	14.9634	20.1858	23.4671	18.1434	13.9262	9.52524	11.6631		103.025	99.3528	89.5392			79.2332				122.539		68.6561	71.5285	98.3103			117.5	114.099	76.4888	85.7117	115.337	80.7322	136.551	68.1132	53.594	60.3756	146.012
59.5		17.2357	14.3219	10.0229	19.0513	23.1383	16.697	0.338142	15.0514	13.882	15.8384	21.2232	21.0192	18.8998	13.4258	9.66752	10.4499		99.4409	77.1819	74.453			84.7575				137.211		38.2516	57.3141	96.6144			104.784	98.0514	82.4298	93.5963	94.5115	81.6346	141.19	66.9744	54.8772	60.0682	145.238
60		16.1941	14.1169	10.9895	17.625	21.3312	15.6201	-2.15501	18.8242	16.7071	16.7133	22.2605	18.5714	19.6561	12.9253	9.80979	9.23675		104.411	72.4835	111.725			79.9062				103.368		55.1129	76.3506	105.796			92.0676	82.0039	88.3709	101.481	73.6858	82.5371	145.83	65.8355	56.1603	59.7608	144.464
60.5		16.735	13.8223	13.0805	17.8748	23.7848	11.2308	-1.37034	16.5933	13.2137	16.9473	21.2482	20.4663	18.8952	10.2143	11.1615	7.21802		99.4851	89.3511	66.097			81.8812				125.373		91.9587	65.0412	97.7039			79.9414	88.7806	86.884	105.239	72.7211	79.6195	152.737	63.2729	60.2595	61.3585	149.194
61		17.433	12.3169	12.7725	21.6313	19.4104	6.84146	-0.58567	14.3623	9.72025	17.1812	20.2358	22.3611	18.1342	7.50328	12.5132	5.19929		98.3946	77.3453	57.5065			89.4504				143.668		83.2929	75.9955	95.8993			67.8152	95.5574	85.3971	108.996	71.7564	76.7019	159.644	60.7104	64.3586	62.9563	153.924
61.5		13.4996	12.5313	6.11579	23.9662	20.0009	10.4858	8.29986	13.902	9.39813	16.687	21.166	21.6578	19.0747	6.85248	11.9298	7.88818		98.6602	88.7413	63.0105			84.5522				147.137		73.3792	54.2805	83.8329			83.2009	95.7682	80.2013	97.3273	84.9971	85.0046	153.422	59.794	59.3963	66.4081	156.017
62		14.9341	11.1495	11.8949	17.1771	24.7721	14.1302	17.1854	13.4417	9.07602	16.1928	22.0963	20.9545	20.0152	6.20167	11.3464	10.5771		97.691	85.2234	73.0996			87.8051				193.72		73.0646	49.8047	76.8391			98.5866	95.9789	75.0055	85.6584	98.2378	93.3073	147.199	58.8777	54.4341	69.8599	158.11
62.5		14.1899	12.4708	14.8966	24.8405	24.695	14.9492	11.3529	13.5455	2.34206	14.2986	18.3192	20.8427	19.5856	9.72358	12.0686	9.41452		96.9085	81.5914	65.6541			82.3685				171.838		95.6947	61.273	70.0693			95.6312	92.1382	76.3082	91.0112	103.653	87.3413	151.859	60.9909	52.8878	69.5684	146.376
63		15.2991	17.0083	14.4352	21.1814	17.1454	15.7682	5.52032	13.6492	-4.39189	12.4043	14.5422	20.7309	19.1559	13.2455	12.7907	8.25198		97.1631	87.3116	40.2098			93.3945				130.802		77.0726	61.2177	83.8919			92.6759	88.2975	77.6109	96.3641	109.068	81.3753	156.519	63.1042	51.3414	69.2769	134.643
63.5		17.4801	17.4963	15.7513	19.547	19.6142	18.0183	6.65863	13.8398	-0.17837	13.303	16.7957	22.3258	17.7828	10.4579	13.7164	8.9365		98.9148	78.4041	61.6881			69.3833				228.198		71.003	64.9072	119.287			88.7701	89.8246	80.4636	97.7199	102.709	82.929	150.295	57.5469	53.73	69.0068	145.874
64		21.8085	19.4903	18.1771	16.8543	19.6776	20.2684	7.79694	14.0305	4.03515	14.2017	19.0492	23.9207	16.4098	7.67027	14.6419	9.62102		99.7179	71.7258	80.9815			61.9944				136.299		73.4782	59.7345	111.837			84.8644	91.3516	83.3162	99.0757	96.3498	84.4827	144.071	51.9895	56.1186	68.7366	157.106
64.5		21.3707	14.6937	12.4892	17.3432	20.5477	14.251	16.0099	14.8288	3.04034	14.6979	17.4398	23.6796	18.3007	4.09794	13.229	10.7205		97.8934	89.4424	61.498			71.0522				112.11		66.9317	49.87	129.725			91.4337	86.3388	85.1726	93.0458	100.664	77.5827	153.427	53.8685	53.6736	69.4459	158.678
65		17.5526	12.91	8.82642	15.9897	22.3682	8.2336	24.2228	15.6272	2.04554	15.1941	15.8303	23.4385	20.1917	0.525608	11.816	11.8201		100.924	86.0672	81.0383			65.4911				156.582		62.8294	46.2199	162.64			98.0031	81.326	87.029	87.0158	104.978	70.6827	162.784	55.7475	51.2286	70.1552	160.25
65.5		12.8088	15.2589	6.62713	19.5904	24.7798	9.78214	21.8448	17.647	4.39784	16.133	19.8081	22.1668	18.7898	7.26365	11.1782	11.5664		97.3455	82.5063	41.2719			64.714				161.77		74.2458	57.293	112.496			98.7032	79.3921	91.0362	98.89	107.499	79.8942	162.557	55.9476	62.2937	70.9933	145.746
66		11.8678	20.8942	7.96144	18.4864	23.5433	11.3307	19.4668	19.6668	6.75014	17.072	23.7859	20.895	17.388	14.0017	10.5403	11.3128		97.2362	76.1449	57.7826			53.3918				240.406		64.0097	54.4547	110.624			99.4034	77.4582	95.0433	110.764	110.019	89.1057	162.33	56.1477	73.3588	71.8314	131.242
66.5		17.7416	23.6259	8.37597	15.3088	22.1301	3.31993	14.5771	18.1954	2.61888	17.2821	24.0279	22.8298	13.6693	12.115	9.65158	8.99793		96.0109	86.8603	44.0904			76.3874				189.06		41.4483	54.4208	104.791			86.0301	74.4919	95.6043	107.626	135.352	93.4322	161.821	57.4549	68.8537	71.4129	130.129
67		17.1227	22.1639	9.66941	18.1989	25.4812	-4.69084	9.6873	16.7239	-1.51238	17.4923	24.2699	24.7647	9.95071	10.2283	8.7629	6.68306		100.716	101.93	55.7846			84.4722				148.729		33.9637	56.9742	103.275			72.6567	71.5256	96.1653	104.488	160.684	97.7586	161.313	58.7622	64.3487	70.9945	129.015
67.5		16.2422	18.0712	8.10226	13.662	21.9269	-2.67321	3.59535	17.5297	3.42885	19.3546	24.069	24.7691	13.4348	7.63327	9.23328	6.83615		99.495	89.6319	81.2894			76.294				133.343		111.168	39.2786	100.987			78.7755	74.5209	100.332	102.218	137.269	99.9966	155.617	57.5525	59.9899	72.4077	139.933
68		15.1558	20.1152	14.9435	14.0694	23.1038	-0.65558	-2.4966	18.3354	8.37008	21.2169	23.868	24.7735	16.9189	5.03823	9.70365	6.98924		97.225	87.4587	76.4467			83.0019				135.981		120.614	55.7397	140.094			84.8943	77.5162	104.499	99.9486	113.853	102.235	149.921	56.3428	55.6312	73.8209	150.851
68.5		13.7164	21.1581	12.4749	19.2446	23.2097	3.05184	11.1515	15.7231	4.29431	16.9309	24.6617	24.2722	17.5982	4.36575	10.1808	9.09905		98.7158	79.2786	93.5068			73.1835				142.975		85.3366	50.3463	156.453			97.2595	86.2509	93.0542	102.047	121.967	98.8551	156.874	58.5882	68.1579	74.7038	154.995
69		17.2144	20.7486	12.2741	15.011	22.9467	6.75925	24.7997	13.1107	0.218539	12.6449	25.4554	23.771	18.2775	3.69326	10.6579	11.2089		100.463	109.036	48.7814			71.6282				239.608		99.007	58.8337	182.055			109.625	94.9856	81.6096	104.146	130.081	95.4756	163.827	60.8337	80.6847	75.5868	159.139
69.5		20.1319	19.0659	14.5752	13.2959	25.4876	12.3083	15.3519	14.9456	5.18281	13.9355	21.7327	23.5315	20.1079	4.74096	10.7116	12.3143		99.5085	102.26	86.7778			78.6726				148.538		71.5544	46.1787	210.868			90.6706	107.371	85.7062	107.649	133.113	89.1125	165.421	64.7585	75.9288	72.7859	163.701
70		19.0018	22.2892	6.57847	14.2453	21.1351	17.8574	5.90409	16.7804	10.1471	15.2261	18.01	23.2921	21.9383	5.78866	10.7652	13.4198		101.324	86.324	82.156			73.5679				141.911		54.1869	35.7194	173.154			71.7164	119.755	89.8028	111.152	136.146	82.7493	167.014	68.6832	71.1728	69.985	168.263
70.5		16.5484	20.1447	9.7708	14.7827	27.1428	12.6329	10.5313	15.6977	4.08489	15.1549	17.3027	22.0329	15.348	5.22606	12.5015	13.6011		102.88	96.2527	52.2597			87.7951				184.314		78.033	45.8446	163.482			85.977	114.171	90.1526	101.827	135.041	86.0537	167.731	72.5071	77.2457	73.6537	161.923
71		13.0972	22.4348	12.5111	13.5144	22.9342	7.4083	15.1584	14.615	-1.97731	15.0837	16.5954	20.7737	8.75769	4.66347	14.2379	13.7824		99.3562	94.0931	95.3034			77.5748				134.369		84.5422	50.8218	182.249			100.237	108.587	90.5023	92.5015	133.936	89.3581	168.447	76.3309	83.3185	77.3225	155.583
71.5		16.7358	24.1702	10.48	16.1054	22.3728	10.4738	11.3365	17.7694	2.07151	15.467	16.9401	21.8239	11.3837	3.78778	14.4478	13.7247		100.972	100.356	85.2994			78.4449				139.62		76.4383	46.1723	193.622			84.9408	98.067	89.29	89.1745	141.233	84.1202	161.326	78.0935	80.5231	73.1575	142.052
72		18.7184	21.6178	10.7117	15.8068	25.0347	13.5393	7.51464	20.9238	6.12034	15.8504	17.2848	22.8741	14.0097	2.9121	14.6577	13.6669		100.568	123.83	86.7778			62.4508				156.326		113.535	42.8224	116.54			69.644	87.5473	88.0776	85.8475	148.53	78.8824	154.206	79.8561	77.7276	68.9925	128.522
72.5		20.4012	19.6741	10.1632	16.6046	23.1375	17.1634	18.5249	16.8567	6.07783	16.7663	19.9173	21.4691	13.0015	6.12564	14.758	13.0854		98.8102	101.255	53.9501			67.2028				146.774		116.42	30.7456	153.463			85.1285	88.4661	86.8317	92.7267	152.105	73.404	148.714	76.1723	75.8777	74.9815	136.265
73		20.9173	17.679	2.37916	15.8708	23.7749	20.7874	29.5351	12.7897	6.03532	17.6822	22.5498	20.064	11.9932	9.33918	14.8582	12.5039		98.6029	95.1089	96.0408			76.0092				214.494		97.2608	46.8207	166.157			100.613	89.3849	85.5857	99.6059	155.679	67.9256	143.223	72.4885	74.0278	80.9705	144.009
73.5		15.496	19.5584	7.81874	15.223	25.8033	15.8598	7.76499	15.2001	6.80002	16.297	24.2155	21.3013	12.4709	7.86721	12.5688	13.4558		98.7386	90.8457	86.7778			69.5836				176.685		109.463	48.8694	164.451			102.932	92.3921	85.4896	100.24	154.996	79.1702	150.939	75.2746	68.6845	80.2403	139.148
74		12.1684	18.7588	10.789	16.5177	25.028	10.9322	-14.0051	17.6105	7.56472	14.9117	25.8812	22.5386	12.9485	6.39524	10.2794	14.4076		99.4717	80.1296	106.805			89.1684				197.667		118.865	42.2047	175.968			105.252	95.3993	85.3936	100.875	154.312	90.4149	158.655	78.0607	63.3413	79.5101	134.287
74.5		17.0447	18.5082	6.8523	18.1712	25.5209	9.95332	-3.90691	16.8006	5.94833	12.8816	23.0305	22.7204	15.7378	13.5665	12.8407	12.3962		101.966	97.2615	89.9944			84.959				199.033		80.5173	42.3193	163.012			115.731	95.0155	84.8938	104.533	141.56	78.5402	157.523	82.8322	59.1512	84.0251	124.414
75		20.452	20.4302	4.85695	13.7629	28.0991	8.97439	6.19128	15.9907	4.33195	10.8514	20.1797	22.9023	18.527	20.7377	15.4021	10.3848		99.4797	99.9916	71.5323			84.7638				164.115		109.683	55.2114	132.556			126.21	94.6317	84.394	108.191	128.807	66.6655	156.391	87.6037	54.9612	88.5402	114.541
75.5		18.9431	17.8581	9.67905	16.9777	24.9668	5.90824	15.4027	18.2682	5.14555	11.6777	20.7232	20.6325	16.6483	14.9065	13.533	12.5415		97.523	97.5639	72.9124			75.4053				179.918		130.467	40.1341	165.063			146.05	91.7594	92.9385	115.224	121.584	72.0499	167.445	85.6156	55.9889	86.2207	113.49
76		15.1117	15.4127	11.3611	18.7115	24.7228	2.84209	24.6141	20.5457	5.95916	12.5041	21.2666	18.3626	14.7696	9.07534	11.6639	14.6981		98.8797	90.8688	106.597			85.6933				165.157		120.638	55.5797	187.155			165.891	88.8871	101.483	122.256	114.361	77.4342	178.499	83.6275	57.0165	83.9013	112.439
76.5		15.9237	15.5717	3.4437	17.3888	21.5465	8.04263	26.0864	18.4877	8.74741	13.9877	20.6559	20.4429	15.0382	10.0571	10.0542	14.0959		98.1436	74.2135	107.887			84.2192				192.075		115.379	74.1787	165.559			134.866	88.6328	95.5806	128.248	107.228	82.7401	181.778	79.4945	62.3276	82.8211	112.54
77		16.7628	17.0722	-1.90346	22.0468	23.6926	13.2432	27.5586	16.4296	11.5357	15.4713	20.0452	22.5231	15.3069	11.0389	8.44463	13.4937		101.115	64.7307	101.712			78.7879				202.12		103.292	74.842	128.805			103.841	88.3786	89.6782	134.239	100.095	88.0459	185.056	75.3614	67.6387	81.7408	112.642
77.5		18.9625	14.803	1.61695	19.6787	23.8143	12.9538	16.6314	15.1974	9.45825	17.2368	16.9	22.4672	17.2941	11.4736	8.16483	14.4727		102.419	95.2657	93.3556			58.4069				202.542		105.872	65.088	98.2597			120.219	101.363	89.1658	118.609	107.894	90.1642	168.305	83.4957	63.5204	79.0572	132.304
78		20.2655	16.7367	4.50827	19.1613	24.2985	12.6645	5.70423	13.9653	7.38085	19.0023	13.7548	22.4112	19.2814	11.9083	7.88502	15.4517		100.062	116.041	74.188			76.1993				145.957		129.554	71.4882	105.079			136.596	114.348	88.6533	102.979	115.693	92.2826	151.553	91.63	59.402	76.3736	151.965
78.5		16.6076	18.0673	6.00176	19.7469	22.9097	15.1677	9.10115	13.0723	5.4596	20.7243	17.4191	23.2341	19.9837	9.15941	8.05132	11.4755		100.279	121.234	99.9334			77.065				135.981		122.839	59.4495	71.0211			111.856	57.1739	91.3079	112.327	105.915	78.1994	154.533	85.5899	58.2313	80.98	151.865
79		21.0916	14.3189	4.52686	18.6906	24.3549	17.6708	12.4981	12.1792	3.53835	22.4461	21.0833	24.0571	20.686	6.41048	8.21763	7.49922		99.897	120.067	82.8575			79.02				129.501		129.598	49.5633	93.8838			87.1162		93.9624	121.674	96.1374	64.1162	157.514	79.5498	57.0605	85.5864	151.765
79.5		21.9646	15.2041	6.72911	18.2354	26.0057	11.4451	15.9722	11.2574	3.88106	18.2518	22.0623	24.3381	17.5623	8.05397	10.2356	9.11681		100.699	120.597	92.0678			77.2759				120.009		104.739	50.9998	118.874			95.3441		111.266	129.784	102.983	70.5666	167.242	80.3763	58.4678	86.176	144.945
80		21.189	15.4673	7.49787	19.26	25.6064	5.21948	19.4463	10.3356	4.22378	14.0575	23.0413	24.6192	14.4385	9.69747	12.2537	10.7344		99.5413	103.495	97.3396			92.242				89.2111		122.161	53.3162	80.7756			103.572		128.57	137.892	109.828	77.017	176.969	81.2027	59.8751	86.7656	138.125
80.5		22.3805	15.3146	13.7369	22.2877	23.0876	9.70009	11.9888	13.2883	-0.3959	17.5494	24.2716	21.9874	15.2658	12.4947	12.5684	10.5129		99.5998	109.521	100.791			69.6421				59.7141		145.297	51.9414	72.2519	45.4876		93.806		115.319	136.451	120.347	73.5209	177.565	85.79	57.0767	83.7536	137.683
81		21.1442	18.7801	5.92934	20.6065	19.2087	14.1807	4.53127	16.2411	-5.01558	21.0412	25.502	19.3557	16.093	15.2919	12.8831	10.2915		104.994	96.315	117.59			71.6804				90.6306		187.411	64.649	55.943	53.056		84.0401		102.068	135.009	130.867	70.0249	178.161	90.3774	54.2783	80.7415	137.241
81.5		17.4429	18.9347	10.9669	22.221	24.8361	5.19477	8.40762	17.8258	-0.70959	20.0136	27.696	17.4357	15.8536	14.1132	12.5886	10.8997		102.843	115.004	75.1852			80.1451				130.16		181.994	59.0037	75.9742	70.8875		94.4111		105.074	120.202	132.826	67.4283	170.159	88.8908	63.5906	80.4793	148.577
82		17.9995	20.8865	7.25497	19.9927	23.5543	-3.79115	12.284	19.4105	3.59641	18.9861	29.8899	15.5157	15.6142	12.9345	12.2942	11.508		101.308	110.472	67.3499			94.1921				105.763		163.677	50.3126	67.2349	87.435		104.782		108.08	105.395	134.786	64.8318	162.157	87.4042	72.9029	80.2171	159.912
82.5		19.9344	20.9026	4.19111	18.864	26.3433	8.27265	7.30862	18.0572	4.36964	17.3657	26.8119	19.7453	16.011	11.8339	13.2669	10.1319		103.167	126.288	61.8972			67.2147				84.9536		172.399	49.7058	74.103	54.9266		115.666		112.919	101.654	124.841	57.6782	165.345	84.2424	65.193	78.18	153.579
83		21.3331	19.3369	7.40682	18.0691	23.0249	20.3364	2.33325	16.7038	5.14287	15.7454	23.7339	23.9749	16.4078	10.7333	14.2396	8.75586		103.944	102.45	75.8789			76.2083				75.3713		184.425	52.7878	66.1262	59.923		126.549		117.758	97.9134	114.896	50.5245	168.533	81.0806	57.4831	76.143	147.247
83.5		22.9838	16.7074	9.69402	16.5682	23.4877	9.64776	14.8822	17.2354	6.179	14.6094	23.5902	22.6737	16.4343	9.43642	13.7389	11.3524		104.836	106.051	80.1252			71.0937				69.8066		123.929	45.1285	84.2811	105.049		112.254		122.605	98.726	142.352	53.5867	171.938	83.8016	54.5278	79.2018	125.59
84		23.0383	16.8316	5.32995	15.6486	23.656	-1.04094	27.4311	17.767	7.21513	13.4735	23.4465	21.3726	16.4607	8.13951	13.2383	13.949		100.985	141.232	58.5806			77.8235				82.0574		144.707	47.118	61.8049	58.4376		97.9578		127.452	99.5386	169.808	56.6489	175.342	86.5225	51.5726	82.2605	103.932
84.5		18.2876	14.2614	5.30065	16.166	25.2623	6.81274	22.2486	18.1906	5.52134	13.6097	21.4723	25.7441	20.3245	9.78079	10.9474	12.9513		106.07	141.993	56.877			64.8015				61.6674		161.371	48.1563	81.225	57.5938		113.69		125.904	98.9531	161.502	51.0292	176.766	81.7259	49.3242	83.1879	120.829
85		18.7521	16.3773	8.20253	15.4501	21.069	14.6664	17.0661	18.6141	3.82755	13.7458	19.4982	30.1156	24.1883	11.4221	8.6565	11.9537		103.13	128.114	52.3409			76.7066				75.3541		187.32	46.0812	84.9133	55.8455		129.423		124.355	98.3677	153.197	45.4095	178.189	76.9292	47.0758	84.1154	137.726
85.5		20.1022	15.5575	3.34451	16.7798	24.5993	11.0897	13.2205	14.9741	2.23879	15.9816	18.5128	30.7348	21.3039	10.6329	11.3771	9.37432		105.333	121.731	70.8379			61.5975				100.733		182.304	42.56	86.6803	53.8733		117.441		121.564	103.362	139.788	49.0226	183.11	77.8207	49.8191	84.5207	132.843
86		17.0713	17.4829	6.15245	20.4637	25.2509	7.513	9.37483	11.3339	0.650024	18.2174	17.5273	31.3539	18.4195	9.84364	14.0976	6.79498		104.914	142.123	64.159			81.902				69.0124		138.24	41.1732	84.9133	63.4095		105.46		118.772	108.356	126.379	52.6358	188.031	78.7121	52.5624	84.926	127.96
86.5		19.6295	17.9053	9.29975	20.1916	24.4742	9.36706	4.18159	12.6732	-3.04446	17.296	23.3546	28.8396	16.9799	7.91801	13	8.58342		105.726	135.577	85.2994			87.3221				76.9288		137.579	33.7918	57.5238	84.3599		99.9209		110.586	98.4593	129.666	48.3759	181.312	84.3871	51.3643	83.8124	133.132
87		17.9741	18.6087	4.49812	21.0799	22.4539	11.2211	-1.01166	14.0124	-6.73895	16.3746	29.1819	26.3254	15.5403	5.99238	11.9023	10.3719		106.3	107.576	49.8467			77.4914				67.6352		153.414	33.1045	114.783	78.7539		94.3816		102.4	88.5631	132.953	44.1159	174.593	90.0621	50.1661	82.6989	138.305
87.5		17.0685	17.153	9.34575	21.0748	25.8817	15.2655	4.45601	13.5355	-4.99169	15.261	23.281	24.0619	12.4859	8.55714	11.7663	11.1915		107.375	118.436	94.0956			70.7841				108.378		122.622	41.0688	109.83	55.3829		83.0584		108.045	94.3112	128.978	47.1566	168.073	85.9767	55.0012	81.513	135.582
88		18.3085	21.8958	10.8484	18.1273	27.3536	19.3098	9.92367	13.0585	-3.24443	14.1474	17.3802	21.7984	9.43148	11.1219	11.6303	12.0112		107.212	149.531	89.7954			75.4816				60.9569		133.638	45.965	126.469	82.7453		71.7353		113.69	100.059	125.002	50.1972	161.552	81.8912	59.8364	80.3272	132.858
88.5		20.7836	19.7455	6.02034	17.8076	31.1401	11.1625	14.0462	18.0611	5.89259	18.2425	20.0838	22.2338	9.0937	9.25293	10.962	11.5962		102.336	133.558	67.8524			85.976				91.6779		141.784	45.6039	87.8951	66.1859		70.5164		108.934	97.7946	131.235	46.3559	171.754	89.0982	64.8605	77.4303	129.085
89		20.6952	18.4322	9.37057	21.5797	27.5613	3.01515	18.1687	23.0637	15.0296	22.3377	22.7874	22.6692	8.75591	7.38397	10.2937	11.1813		101.264	152.094	95.925			80.508				87.5279		165.396	56.715	67.9453	54.8357		69.2975		104.179	95.5299	137.468	42.5145	181.957	96.3052	69.8845	74.5335	125.313
89.5		22.8094	15.5551	2.88841	19.81	25.5667	13.8687	14.5525	23.971	10.864	18.8522	21.5313	22.569	13.2353	10.2024	7.22757	11.736		102.551	159.17	92.1984			71.8712				90.4071		152.574	47.4914	53.8317	79.0983		56.3024		104.037	97.7696	153.881	39.1944	189.258	92.7841	74.7985	72.8762	124.572
90		20.4099	18.1153	3.37171	16.9357	27.7461	24.7222	10.9362	24.8782	6.69846	15.3668	20.2751	22.4688	17.7146	13.0208	4.1614	12.2907		103.798	117.415	98.6905			84.6952				69.9647		206.613	37.1952	105.772	66.0339		43.3073		103.894	100.009	170.294	35.8742	196.56	89.263	79.7125	71.219	123.831
90.5		18.3503	17.019	5.68963	20.6642	29.9083	24.1208	9.79725	25.885	7.17494	16.6029	20.3302	22.569	14.908	7.67928	5.14628	12.5189		105.567	188.941	42.8708			62.1499				96.1655		142.995	49.9174	94.6743	49.4695		69.0344		108.485	94.8399	153.967	40.8147	184.427	81.3623	83.499	70.6761	126.274
91		20.1646	19.1156	5.62829	21.5821	34.4833	23.5194	8.65827	26.8918	7.65142	17.839	20.3852	22.6692	12.1014	2.3378	6.13116	12.747		103.585	206.545	46.0393			78.3887				88.4551		142.717	39.2871	113.959			94.7615		113.075	89.6705	137.639	45.7551	172.294	73.4616	87.2855	70.1332	128.716
91.5		21.1191	15.536	2.83105	19.3918	26.9871	19.2284	9.94591	21.1829	5.1355	17.7173	20.9093	21.4271	15.0594	8.79369	9.43379	11.7037		107.212	162.949	59.2454			73.5926				128.666		237.25	45.7353	100.662			91.1439		108.628	107.635	124.634	52.7272	160.943	77.0475	73.3477	65.6427	135.338
92		14.2338	19.7766	5.57389	17.0835	30.3352	14.9374	11.2336	15.4741	2.61959	17.5956	21.4333	20.1849	18.0174	15.2496	12.7364	10.6604		103.331	215.347	81.3572			68.9338				61.9989		175.553	52.7878	90.6727			87.5263		104.181	125.6	111.63	59.6993	149.592	80.6334	59.41	61.1522	141.96
92.5		15.7646	20.9174	11.965	20.9544	31.3514	13.474	15.3461	14.3089	2.57543	18.832	21.3487	23.4162	13.6916	12.7778	14.7342	11.411		103.573	177.947	49.5888			68.2067						174.129	64.9444	142.468			86.6727		114.05	116.049	127.832	49.8868	152.611	82.9697	62.072	60.4233	140.044
93		20.2183	19.4219	9.8803	18.9849	29.0194	12.0107	19.4587	13.1437	2.53126	20.0684	21.2641	26.6474	9.36579	10.306	16.732	12.1616		101.92	165.118	62.18			74.2904						229.947	59.8272	96.3591			85.8191		123.92	106.497	144.034	40.0744	155.629	85.3059	64.7339	59.6944	138.127
93.5		18.7035	16.8378	8.40985	18.2007	29.2813	3.89396	10.5943	12.2094	0.658629	18.4198	19.1852	25.2727	8.65412	10.8745	15.682	10.8969		102.92	161.999	60.4072			84.2924						206.119	55.8448	137.192			85.2649		118.011	109.279	165.308	51.1068	166.337	86.1024	69.7373	59.5051	137.684
94		16.9644	20.9831	11.0919	16.7351	31.3702	-4.22276	1.72982	11.275	-1.214	16.7711	17.1063	23.8979	7.94246	11.443	14.6321	9.63225		106.76	189.865				65.4203						152.357	36.1938	106.679			84.7107		112.103	112.062	186.582	62.1392	177.045	86.8988	74.7406	59.3158	137.241
94.5		15.0007	23.0525	8.91073	18.4789	25.5851	0.505137	9.67079	13.2742	3.05647	19.302	16.8844	26.4481	14.7423	9.30879	13.8129	10.3823		104.207	161.189				69.9957								119.61			88.2193		120.009	113.047	175.564	58.2141	173.108	91.935	81.7189	62.9069	140.736
95		16.9437	22.4682	11.8817	17.7098	28.4484	5.23303	17.6118	15.2734	7.32695	21.8329	16.6625	28.9983	21.5422	7.17454	12.9938	11.1323																		91.7279		127.915	114.033	164.545	54.2891	169.172	96.9713	88.6972	66.4981	144.23
95.5
96
96.5
97
97.5
98
98.5
99
99.5
100
100.5
101
101.5
102
102.5
103
103.5
104
104.5
105
105.5
106
106.5
107
107.5
108
108.5
109
109.5
110
110.5
111
111.5
112
112.5
113
113.5
114
114.5
115
115.5
116
116.5
117
117.5
118
118.5
119
119.5
120
120.5
121
121.5
122
122.5
123
123.5
124
124.5
125
125.5
126
126.5
127
127.5
128
128.5
129
129.5
130
130.5
131
131.5
132
132.5

[truncated: 3 more sheets: Figure 3R, Figure 3S, Figure 3T]
