# Supplementary material for: Cortical anchoring of the microtubule cytoskeleton is essential for neuron polarity
Source: eLife. 2020 Apr 15;9:e55111. doi: 10.7554/eLife.55111 (PMC7159925; doi:10.7554/eLife.55111)
Supplement: Figure 4—source data 1. [file elife-55111-fig4-data1.xlsx]

## Sheet: Sheet1
Figure 4F
Periodicity (nm)		GN600	STR282	STR485	STR554	STR553
		172	222	178	186	250		GN600	UNC-70::TSMOD
		181	178	204	209	248		STR282	UNC-44::GFP
		204	327	153	205	217		STR485	UNC-119::GFP
		178	200	194	273	606		STR554	UNC-33L::GFP
		188	250	212	163	256		STR553	UNC-33M::GFP
		196	194	172	195	280
		178	164	238	141	217
		185	200	185	190	278
		189	208	192	217	227
		195	312	204	217	500
		199	200	156	210	205
		176	167	212	164
			143	227
			217	273
			204	195
			303	161
			185	212
			188	178
			186	195
			163	181
			182	183
				250
				273
