# Supplementary material for: Cortical anchoring of the microtubule cytoskeleton is essential for neuron polarity
Source: eLife. 2020 Apr 15;9:e55111. doi: 10.7554/eLife.55111 (PMC7159925; doi:10.7554/eLife.55111)
Supplement: Figure 5—figure supplement 1—source data 1. [file elife-55111-fig5-figsupp1-data1.xlsx]

## Sheet: Figure 5 sup 1B
retrograde EBP-2 growth events in the PVD anterior dendrite (%)
	wild-type	unc-33(mn407)	unc-33(mn407);UNC-33LΔC::GFP
	100	50	25
	100	40	22.2222
	100	15.3846	0
	100	22.2222	20
	100	10.5263	33.3333
	100	0	42.8571
	100	0	50
	100	33.3333	0
