# Supplementary material for: Cortical anchoring of the microtubule cytoskeleton is essential for neuron polarity
Source: eLife. 2020 Apr 15;9:e55111. doi: 10.7554/eLife.55111 (PMC7159925; doi:10.7554/eLife.55111)
Supplement: Figure 5—source data 1. [file elife-55111-fig5-data1.xlsx]

## Sheet: Figure 5D 
time(s)		UNC-33S::GFP FRAP											UNC-33SΔC::GFP
		w1	w2	w3	w4	w5	w6	w7	w8	w9	w10		w1	w2	w3	w4	w5	w6	w7	w8	w9	w10
0		0	0	0	0	0	0	0	0	0	0		0	0	0	0	0	0	0	0	0	0
0.5		7.50138	11.9426	4.40106	5.20601	3.20352	8.89054	2.70091	5.2709	7.43567	0.841623		18.5525	12.1514	17.3533	21.8701	20.7001	45.5712	19.7981	20.6132	23.1622	19.6786
1		15.7262	14.645	3.85299	8.79242	4.50388	13.9176	6.78359	6.09257	11.3646	3.0216		45.4009	33.3402	34.4575	41.2584	35.6171	31.7885	34.8037	26.3685	36.1428	33.4784
1.5		23.5222	17.6698	4.92506	5.93148	9.4511	17.7329	13.874	6.73845	12.4876	1.83798		60.2355	49.8058	37.0331	46.8273	38.1119	31.1343	38.264	41.2889	41.0508	27.1073
2		27.2497	19.371	7.6117	8.53588	7.92013	17.7005	13.682	10.9894	15.4548	8.42816		82.3047	67.9984	39.0127	65.2597	46.184	37.3491	67.178	41.9087	45.8956	32.7517
2.5		31.2551	19.7796	8.12204	12.0329	21.4669	18.1861	14.4725	13.3288	14.6527	6.41536		64.8391	50.8364	65.4239	55.8593	52.8208	36.399	73.2936	36.7497	40.0256	44.2542
3		28.5442	24.0333	9.77551	12.1969	12.9585	18.5014	14.7036	16.4389	17.3886	9.37426		65.1313	54.2497	42.8456	59.2475	58.3934	38.37	62.0614	47.7216	42.7293	46.757
3.5		24.9976	21.3874	18.1951	13.3981	10.2241	20.4266	13.9	15.3844	19.1704	8.36562		79.4742	63.3732	52.2421	65.5117	60.3445	37.6944	81.2533	49.8472	40.2649	35.5959
4		27.9298	22.2956	16.9978	12.1856	13.0869	20.8216	14.5995	11.8435	23.2161	6.7109		63.7944	82.2022	57.8721	71.8765	59.5522	47.588	73.8267	51.641	35.266	57.9436
4.5		29.9313	25.2142	20.6291	18.6512	19.609	27.0538	14.5008	12.1222	24.5479	6.37826		52.517	69.4252	50.3262	75.8683	62.4267	67.4717	77.0673	57.0232	40.4466	39.069
5		33.9123	26.9492	20.6789	13.572	14.5845	20.3714	16.8506	16.3428	27.1536	6.61172		47.0044	64.7335	55.4043	76.1609	70.1373	64.4101	82.9847	52.8148	59.7456	43.6324
5.5		26.1112	31.7816	16.3132	15.6519	8.9195	25.3788	14.5226	14.1692	25.8926	8.6066		65.9719	55.1038	57.435	59.7934	61.8473	72.9749	82.949	53.626	49.235	60.095
6		34.7988	33.7718	18.3279	16.3132	13.1815	26.3799	14.4525	15.2354	25.3418	8.65903		76.7061	66.8462	59.0289	76.3424	63.4943	85.3067	82.7844	55.3615	43.7102	43.9416
6.5		32.973	29.241	22.4097	15.8007	21.007	21.2259	17.0988	15.5744	25.5496	12.8376		76.4347	78.2895	66.1439	75.6233	62.8047	73.6368	69.1912	65.1611	39.9858	48.0546
7		34.9185	33.858	19.7335	12.5105	29.5445	15.6573	13.037	16.7872	25.6369	12.8333		79.7751	50.8907	70.8634	72.9194	68.8355	78.5397	81.8497	53.1251	46.721	63.1776
7.5		38.3526	33.5743	20.8899	11.6563	29.9496	17.2647	14.2348	25.019	23.7777	9.82474		74.2614	60.5237	69.8062	71.7203	68.7025	74.7223	86.2184	52.3721	62.353	61.4532
8		38.0774	34.299	25.8113	12.4395	19.5717	26.0411	17.4864	23.3633	25.3446	12.2947		78.9039	70.3383	64.1847	96.6219	75.8929	77.1593	77.2138	51.1525	61.5116	56.5219
8.5		39.6012	31.395	24.8869	14.464	22.5876	26.1786	15.2537	22.4929	22.2656	10.7262		75.7049	71.0941	55.2326	92.354	67.2875	70.8672	80.2508	66.2505	77.7149	42.2936
9		43.7243	35.8795	25.0881	20.7949	26.584	16.8788	16.0116	23.6112	26.6657	12.9448		76.5251	74.1249	55.0038	100.121	66.1729	77.9494	77.1313	56.9817	59.6053	54.4082
9.5		40.0774	36.0625	32.817	22.2841	29.0007	19.5586	14.8531	22.1745	42.6165	13.7181		63.0314	80.5213	81.6522	69.0456	62.5399	73.1528	93.0382	58.8665	61.1237	62.9545
10		34.5228	35.5984	26.9769	15.2325	21.0747	20.9704	17.2538	21.1189	32.1226	11.2861		63.6074	94.169	80.5955	88.6418	65.2181	67.5176	99.8853	63.6679	61.1445	56.6672
10.5		35.5272	37.1519	25.5098	19.1372	39.1677	20.8556	19.9008	20.4973	33.6917	12.3635		79.2971	105.46	56.6336	69.5534	68.8126	70.1891	94.9864	56.4988	77.7149	47.0686
11		42.9107	40.2727	28.691	24.6033	29.4432	29.3773	18.9379	20.1025	36.5873	13.4777		64.5975	96.7116	79.3773	92.7639	54.7524	74.1245	80.8441	61.4688	83.3333	59.7194
11.5		39.6543	37.2385	28.4897	20.5219	40.7836	28.0726	12.7761	21.2815	29.4508	18.8604		68.9876	98.2087	65.5792	94.9295	59.0213	67.9152	75.5167	62.049	69.5941	74.8297
12		38.9644	33.8914	25.7334	29.0143	21.8195	20.1118	16.3276	18.3554	23.6623	19.1306		73.3326	113.996	57.1592	105.424	55.2653	62.9135	75.8602	68.5768	61.094	65.4806
12.5		42.5084	35.772	30.6974	27.1975	31.2151	19.9328	14.1497	20.3414	30.707	21.2429		71.7689	105.789	81.0114	95.9245	50.856	68.7567	86.2644	71.5191	76.9495	58.7164
13		40.3299	37.7573	29.1678	22.3272	29.081	21.2748	14.1276	20.2704	28.416	16.962		77.8009	85.9909	87.5452	93.4165	58.8458	63.8332	98.3901	71.5576	86.5085	72.4678
13.5		41.9433	36.989	26.6341	21.518	29.3272	21.5683	12.9375	20.915	25.9834	18.2686		73.8874	73.7725	77.1212	97.413	62.769	78.8757	84.5145	76.1816	70.4094	77.1727
14		36.7445	35.0353	28.4327	25.6043	28.6195	19.0066	15.7889	20.5774	22.5849	18.6718		82.0801	89.7235	95.5936	103.127	52.2142	68.4155	81.879	65.3221	73.4821	79.7206
14.5		33.6665	29.8222	36.1622	28.7933	29.5462	14.5835	21.0711	24.6377	27.3405	18.721		74.9308	103.268	91.7889	117.407	53.2841	81.4332	80.7682	67.7883	77.7149	81.3029
15		37.8786	30.1328	34.9576	29.8463	28.4667	14.7082	18.1357	22.7919	25.5921	18.5774		69.7157	105.101	84.5468	89.1629	56.0198	52.7778	80.4434	70.7471	81.3608	88.1104
15.5		44.4961	30.6104	30.848	29.4114	38.9247	12.4273	21.4623	24.6695	32.5204	16.4762		90.9994	114.102	90.335	92.2179	63.501	70.2753	83.647	62.324	81.0626	78.6248
16		38.9963	34.2552	31.425	28.0804	52.536	15.0742	19.3366	26.4975	31.803	18.8144		96.7052	99.5836	88.5995	88.3621	67.1916	76.9743	79.5902	53.314	75.1166	60.0382
16.5		37.7768	32.5145	40.6298	30.0815	51.1049	15.0434	25.5176	28.6089	29.8308	18.2529		89.883	93.9555	96.5447	90.0801	71.6428	72.717	81.8252	47.7758	65.8368	81.5422
17		42.063	31.954	42.4915	31.8008	24.5518	16.6417	28.865	26.3958	37.1909	19.4143		81.1383	103.911	81.9261	103.938	68.0472	83.4718	83.0349	56.5563	57.4589	80.5691
17.5		40.413	34.0878	38.6736	30.2586	30.7479	17.8548	25.0989	26.489	29.5375	16.9438		87.7674	102.984	92.99	91.6398	74.8358	88.933	72.9864	60.4316	80.2235	80.4531
18		35.2329	39.7585	39.03	29.3602	24.4684	14.5737	31.3833	26.5034	37.3912	19.8799		88.2735	83.1692	92.2933	87.0944	62.4843	78.98	72.6712	59.0533	69.9002	52.2119
18.5		30.4053	42.2674	40.6022	34.8929	34.1939	17.1915	31.9383	24.4133	41.4627	17.292		86.4517	72.1923	74.5451	99.3372	77.3245	66.4622	81.7395	56.4637	81.8571	72.3692
19		32.5347	39.1524	35.5607	30.7323	29.0531	15.0503	26.1295	28.1296	39.8805	11.9476		87.9401	90.6877	67.2874	81.3862	77.4752	78.1247	70.816	58.9503	65.5974	76.6687
19.5		38.7079	40.0358	35.036	33.2301	18.6052	20.6552	26.5434	26.2116	37.2543	16.4412		80.3896	96.6295	62.5608	92.4353	88.7138	79.4134	86.8092	66.3389	79.3896	91.1208
20		35.6045	37.6885	32.4984	42.3045	35.1169	27.523	28.864	26.6749	40.0288	17.8323		106.224	87.415	98.115	95.0132	75.666	75.7889	85.5268	81.5326	75.9443	101.216
20.5		37.5461	35.0119	32.9928	37.5904	44.6981	25.7277	29.0264	23.3445	30.2308	19.3075		108.462	91.0218	97.6473	103.454	74.5667	85.9344	96.3694	57.1129	78.233	77.8525
21		41.4802	30.2814	33.2254	41.5486	44.2423	24.4185	32.5902	22.815	32.8235	17.7068		79.2997	108.218	67.3131	106.996	68.8829	70.9947	79.8063	61.9321	76.6364	78.5174
21.5		40.2568	31.8265	31.0741	40.5278	39.7928	22.6462	29.9322	22.6082	37.6373	19.9624		73.1616	116.147	103.276	95.4221	76.2015	95.8148	81.93	65.0908	69.087	96.4769
22		44.7521	34.6978	31.582	42.114	41.7837	24.7432	24.515	26.4305	33.337	21.4654		69.0697	95.8878	86.3432	85.0054	79.3655	105.704	72.3944	63.4671	79.2968	88.9254
22.5		47.2866	30.5581	30.1547	37.7405	36.4166	25.0285	35.5381	25.2504	35.252	20.6601		76.5404	111.339	68.1064	86.1844	68.3544	91.0426	86.4276	62.5695	82.8401	88.7441
23		35.4566	30.1491	38.9615	39.8904	28.6381	29.9523	34.6999	24.3408	33.2107	17.2272		88.5049	95.6372	73.5586	95.2882	75.7649	73.3147	84.3538	72.7714	78.1091	87.8772
23.5		31.8974	29.3873	39.6696	36.7961	31.3191	32.0147	38.9172	27.1102	40.8475	22.4404		96.4853	106.754	74.4831	110.299	69.2396	64.4406	92.2665	61.2301	90.2458	86.8667
24		35.6595	30.1061	40.3961	39.0352	32.0274	30.2889	33.4484	27.9641	52.0052	23.5544		91.216	89.124	71.3864	94.5082	67.8385	57.3655	86.0504	74.1154	82.5484	82.155
24.5		35.0981	31.1741	40.9753	44.2902	40.6914	26.318	27.0823	21.2873	46.3247	22.8206		93.2715	103.113	62.2791	104.696	76.9109	71.1584	99.0316	76.9021	85.5894	69.1553
25		36.6064	27.9199	40.1625	42.5259	37.3224	25.2159	23.7112	25.8984	41.5848	23.8766		93.0252	82.836	62.9197	105.072	80.9032	68.0554	110.219	63.4642	81.384	78.2473
25.5		31.7884	31.3379	41.3954	47.7283	37.9484	24.0012	23.5902	27.3628	43.9277	26.8998		102.874	81.2635	66.8046	97.9363	68.5993	46.0771	91.5361	73.3073	88.3734	63.0305
26		26.34	36.2305	42.7835	59.6525	27.7381	27.7296	30.3041	30.1316	39.1001	23.3735		119.324	86.6678	77.6867	88.6047	77.0884	54.0573	99.0534	71.3138	83.9857	68.3619
26.5		28.9395	37.2506	44.7099	52.5955	33.3735	27.7961	28.9241	34.1445	27.0982	28.8248		106.817	78.866	62.7521	86.8133	84.6648	69.4895	81.6744	60.6924	91.0134	80.0945
27		27.3928	35.3814	39.9327	53.8179	28.1327	29.8858	33.8756	31.1369	27.158	25.9419		97.6676	80.3147	95.9081	99.2604	69.2234	86.2703	89.3713	58.2419	78.9027	84.7476
27.5		27.7607	33.9055	41.6088	55.8156	44.3992	29.1635	24.6977	31.0821	40.5023	23.4655		109.021	76.6796	94.3664	87.9082	69.65	79.3807	94.9864	65.5827	85.6773	71.9394
28		30.3505	35.2011	37.9884	47.0336	31.5161	29.6784	29.6387	31.409	34.9837	23.3767		90.7708	96.0821	82.7047	85.0895	67.0784	71.2437	81.7001	62.99	77.8438	81.0604
28.5		26.1289	38.3726	39.0662	46.8371	33.5895	24.9963	27.31	27.9669	39.0924	22.5617		92.2927	111.384	75.9496	80.7925	56.0228	62.8984	72.642	76.7142	85.2644	56.1237
29		29.8533	39.7648	42.9718	44.307	35.2034	24.6119	22.6414	34.973	36.4268	24.7579		101.613	87.8354	96.9849	83.1661	52.7877	63.477	101.371	70.0003	75.8355	54.8352
29.5		36.5702	33.5548	46.5159	46.2583	28.8169	30.8246	24.7032	38.2902	35.2093	22.8415		100.229	96.8564	119.233	81.9267	54.0795	73.4178	97.3773	65.5831	69.9814	75.5935
30		29.2244	33.8739	41.482	43.9728	42.6256	25.6448	25.831	32.1073	32.9056	23.0637		96.91	104.641	92.9203	86.4959	61.6518	69.1035	103.751	59.0952	59.3195	84.9098
30.5		35.3785	37.6759	40.8494	43.4557	25.1679	30.6003	26.7813	39.3162	46.0889	19.2915		81.7622	131.486	74.3417	74.4102	70.5	64.5778	102.035	65.5135	68.9433	66.1242
31		33.2281	41.0923	42.1514	40.0859	47.3363	30.9289	25.7402	34.3317	40.7079	19.3282		90.8286	76.2911	73.4933	79.2262	62.8041	56.3739	106.052	66.6016	74.8148	77.2912
31.5		32.1777	37.8121	35.6702	41.4078	22.0422	31.3765	25.7133	31.9927	36.742	17.9377		91.9888	79.8364	88.4042	81.3229	71.9402	54.586	102.206	70.8147	76.5967	70.9856
32		32.0793	44.2417	39.1464	49.0657	23.5724	30.014	25.5915	31.9233	35.1476	15.3547		96.4355	83.2161	104.977	97.8997	69.7629	50.7523	87.0995	58.113	92.9656	71.1649
32.5		37.6595	47.1615	40.1493	56.708	57.9669	35.5208	25.3486	31.9623	39.5262	16.8099		91.6613	78.6995	95.3418	90.7389	80.1927	46.5313	91.5354	56.2343	88.4327	96.9633
33		41.6207	46.5316	43.9106	50.1854	24.7501	35.1076	31.1895	43.1669	28.5642	20.5254		85.9519	82.3354	98.0767	97.2178	72.3597	46.9924	96.0869	58.2149	62.3129	88.8197
33.5		43.1795	39.811	44.5073	51.654	36.3402	33.176	31.7387	41.0239	25.031	22.982		106.712	91.3393	86.7029	88.3297	76.2042	60.434	74.2679	58.3215	59.5974	75.9722
34		46.4645	42.9325	40.2317	49.1709	31.528	31.5886	29.6753	41.758	25.9317	18.276		107.369	111.722	90.1637	99.6725	73.5851	62.5586	84.8717	60.9768	70.8077	87.397
34.5		41.3786	47.808	41.2675	47.778	29.5395	32.319	24.4926	39.3418	33.4712	18.8892		105.66	68.3152	111.826	108.375	77.3272	61.3487	88.5372	65.27	69.5351	74.976
35		44.0321	42.1883	44.0734	52.5075	32.3539	36.6547	30.797	34.3964	40.2955	22.5335		117.724	95.2804	69.3345	109.904	69.8495	56.4867	83.8204	59.0393	74.203	78.9807
35.5		43.792	39.0691	49.6499	51.2929	24.88	30.3374	28.3938	38.4193	49.4382	24.8594		109.191	72.6531	77.4576	98.1891	70.5674	52.4937	87.9541	59.9713	77.849	65.6059
36		44.3847	42.0271	50.754	54.7532	37.8764	30.0851	25.4978	38.2511	54.3395	20.3379		107.46	98.4984	86.3757	102.47	77.9756	60.3764	76.5609	61.8075	72.0529	58.59
36.5		45.938	37.244	48.6299	58.552	37.4122	30.7859	26.7023	44.8973	53.9306	16.7127		83.5495	95.4815	110.844	96.3199	92.7102	66.1103	90.6149	62.1975	74.401	70.2486
37		47.564	38.2006	48.0826	51.7383	32.0381	26.323	28.3404	36.1897	56.5634	19.7885		86.5005	107.111	84.347	102.235	76.7465	56.9665	86.4713	60.7332	74.1118	79.1171
37.5		42.6598	36.9967	46.9419	52.4306	50.6752	29.9388	24.9357	37.8432	55.83	16.2352		111.502	107.33	106.891	98.4048	84.3346	64.611	99.7859	70.5886	77.9685	67.7571
38		41.0489	36.1131	45.2927	46.9146	29.0058	28.2206	22.5983	37.0514	52.0271	12.6573		99.4382	113.655	76.4194	95.9156	79.395	61.897	93.2553	55.3513	72.5342	80.7288
38.5		40.7234	33.8389	43.4008	44.4731	21.7849	23.2724	27.078	44.9831	56.7544	16.4857		93.8157	109.937	97.4985	82.1086	87.2238	65.013	90.4071	65.015	65.6557	77.623
39		46.9103	36.1835	45.4805	35.5611	18.7389	20.8378	29.0124	40.7259	59.746	20.5118		91.7097	109.179	82.0876	96.1148	74.6812	77.9317	95.5073	66.1346	67.4181	71.9303
39.5		38.8373	37.6488	42.4084	38.063	27.5457	16.5506	28.8994	34.5047	57.8171	20.068		88.1717	114.653	74.0004	92.0341	75.6655	78.4497	81.4807	67.2765	72.2466	69.9292
40		40.3345	37.0854	42.9529	42.3662	39.8466	18.1371	28.4251	33.879	64.0445	25.8829		82.0946	103.253	93.7241	99.4682	75.5291	57.1732	75.721	68.3225	87.709	59.2035
40.5		42.4283	39.4241	43.2953	50.0626	39.313	23.7515	25.7937	30.9499	67.6026	29.9581		77.4021	114.302	111.789	83.9714	76.301	75.5569	82.944	65.3936	87.0023	64.3732
41		41.9887	40.0962	45.8357	53.2653	36.5278	16.6405	26.9825	35.2175	54.1482	30.536		73.1086	146.367	102.456	74.5563	77.0339	61.7527	104.469	58.5199	70.7946	85.0065
41.5		41.9612	37.7339	50.0454	55.4537	39.755	20.1133	24.5761	34.6806	55.5681	35.0447		89.3542	104.963	115.956	88.9818	72.5459	57.2209	82.1537	62.9613	75.2836	67.3909
42		38.8806	36.8267	51.5805	58.6436	13.4698	29.4553	23.9492	29.6399	54.2138	29.0202		87.4454	104.06	99.7152	97.0856	59.5898	56.4377	88.1818	55.2596	94.8802	83.4153
42.5		43.297	33.0567	48.9125	59.614	27.2244	18.9838	20.154	41.7522	55.7602	30.9193		91.4839	83.5037	97.7995	102.997	68.8203	63.5752	78.3151	60.8319	78.11	82.3816
43		46.6821	34.5048	51.0189	59.7153	28.5394	22.4661	21.4365	29.918	50.6265	37.2444		94.8269	100.202	84.5918	104.001	75.5358	66.7525	77.1012	66.6887	98.836	72.0769
43.5		38.5915	34.715	44.7295	63.4257	28.1634	24.3468	20.3818	33.7325	52.9427	32.9761		111.426	104.085	77.2608	83.8056	76.8684	68.1633	75.0033	67.6744	87.9363	64.0656
44		39.5292	35.267	50.0674	65.1869	28.605	22.0338	22.6559	33.3348	58.9942	34.8639		104.787		76.1468	74.176	86.6594	70.3885	96.2147	64.8509	86.3559	68.4575
44.5		37.843	39.1097	48.9137	57.8324	22.6318	20.4634	19.1896	38.3687	60.6073	30.3619		96.1413	101.63	80.4335	88.5185	85.7323	82.4707	75.7152	62.6466	86.7849	93.4383
45		42.764	39.9169	55.8884	60.5061	40.2743	18.1108	21.6431	32.9029	63.3395	35.2266		75.5071	86.7803	88.2094	88.2254	89.1726	75.7068	80.0843	69.1687	95.9886	85.9385
45.5		47.3244	37.3651	51.5782	55.2281	26.1616	12.5747	26.8012	35.6627	62.0838	33.6533		86.4282	92.3583	79.9697	79.0942	80.9407	76.6608	78.5979	78.4895	81.3794	95.0632
46		47.5502	42.9002	54.0227	62.3879	28.7937	21.1911	19.9592	36.7629	62.0223	33.4071		75.8999	97.4396	71.8684	93.9413	68.5235	57.1347	83.4622	71.2607	77.0777	100.862
46.5		53.6078	41.2016	58.88	57.0708	32.7593	22.4899	12.9673	35.467	58.9614	30.1398		74.3033	77.5561	64.2905	81.3825	75.9307	62.6267	82.2612	72.5556	80.6461	76.4062
47		54.2972	40.2858	57.0924	58.2329	49.7676	12.7975	14.7035	40.314	65.3546	36.9462		87.2212	90.6094	81.6996	87.6904	75.0841	52.5926	96.6892	65.7364	77.2002	80.9835
47.5		57.22	37.6294	49.01	65.7764	56.2272	15.1279	17.287	38.3164	59.4949	33.9227		90.9891	104.501	79.7609	84.8938	80.7275	67.0793	82.5275	81.1504	77.5891	86.6208
48		53.535	38.3958	50.1572	66.4676	33.6528	17.6688	16.2781	36.6469	51.4923	30.0328		91.2484	111.129	74.2861	83.7086	91.7055	61.5882	81.6609	76.778	70.1308	72.434
48.5		51.1251	38.5875	50.1642	69.2099	41.2253	16.4559	20.9979	37.7237	59.7847	25.9564		82.2592	108.093	65.2576	80.6735	124.671	63.4251	69.479	82.0906	77.4587	81.0425
49		43.6968	41.8738	51.7329	72.8883	50.9743	17.0053	24.2067	43.449	64.7695	27.2914		79.7518	119.91	68.0947	79.3638	125.044	68.8383	82.7537	81.4041	83.5962	79.7273
49.5		47.9057	38.5536	45.6614	64.933	38.7972	22.234	29.7737	37.113	57.1151	28.3026		92.4391	108.811	85.9279	76.764	119.673	60.0374	82.023	89.4784	61.1096	65.6781
50		43.4502	42.6221	47.9184	65.0667	51.2486	21.9085	31.9605	31.3986	62.3118	20.025		67.9135	89.9742	77.4526	84.5538	107.917	69.4551	69.4037	77.4762	61.2005	76.5251
50.5		50.6472	37.1976	49.7317	59.0777	56.1126	18.0369	29.0565	33.9284	55.4541	23.8739		57.4544	119.095	116.462	99.1018	102.323	63.8225	75.1796	64.2242	70.8304	62.9454
51		45.2077	37.5101	48.7662	67.9975	51.0562	20.0569	22.123	35.7736	49.1822	28.4207		77.9012	122.732	120.328	90.4687	128.031	75.1878	58.4929	73.9166	56.7038	78.1813
51.5		50.356	39.3461	44.1791	57.1506	51.5571	21.8127	20.4171	38.6017	52.6452	30.4104		68.0577	96.913	109.267	81.6983	105.717	56.7173	54.3687	80.7324	57.2383	100.334
52		48.2311	39.5268	39.0333	56.2998	35.2516	22.4543	19.4563	36.0341	49.0599	26.5908		76.4932	96.0105	105.55	100.473	116.813	58.6846	82.8075	77.3729	66.8611	70.2331
52.5		50.3233	39.3832	39.4254	54.0815	55.2255	21.0143	23.1104	32.5079	49.9346	23.9658		68.4528	101.946	104.218	111.73	112.713	76.8358	84.4298	72.5534	76.8595	81.5236
53		51.3837	44.0537	43.2036	55.3223	19.9084	22.6181	22.0869	34.1836	52.8014	30.57		71.1514	103.222	94.7425	94.3133	84.1691	75.8556	66.2783	75.1193	86.7117	65.039
53.5		48.5534	47.0629	42.6846	52.4696	24.5786	20.1239	27.4823	27.1016	53.5889	33.5627		73.1466	104.106	88.6896	111.296	105.907	69.9171	59.3583	73.2401	82.1092	76.7938
54		58.2132	44.2085	40.7649	42.9622	15.0101	20.2919	21.2483	28.9328	53.1141	32.8561		70.8556	133.054	89.5298	90.1367	78.7037	79.4912	50.0284	60.0847	92.6939	85.9483
54.5		52.4996	48.2473	40.1388	48.6832	37.9535	17.633	27.4022	33.3425	49.5884	32.4747		93.7338	133.023	95.3641	76.4088	70.1842	90.8611	70.7632	81.0245	74.1881	92.7568
55		55.0549	44.9921	42.2199	45.1885	33.814	18.0388	24.643	37.315	48.6954	30.7807		83.136	96.5356	96.2785	89.8555	74.658	93.394	61.801	79.843	84.4065	82.1553
55.5		57.1405	49.368	34.0267	55.0526	43.9106	18.2096	24.6148	37.724	52.0489	28.7794		86.269	104.772	76.6505	93.9162	82.8905	63.3268	57.3738	70.7112	79.5605	79.7478
56		58.9515	48.3092	35.6669	51.1482	27.9876	16.3112	25.7906	34.154	57.5278	30.2693		87.7719	77.7859	106.063	81.0823	81.1614	60.7275	64.0918	64.1896	76.8151	75.0513
56.5		60.9417	48.6317	36.5012	58.5312	33.9628	14.6894	22.4161	33.8778	57.6791	33.536		81.5189	89.3262	95.5565	63.9909	77.5724	58.3165	64.375	60.5799	66.7238	75.0326
57		56.9408	51.9512	36.6195	52.1332	17.8569	14.8771	25.5014	30.0187	45.4921	30.9966		82.7667	81.7782	90.85	70.5399	83.5291	73.3697	74.2954	59.9351	73.1165	81.4411
57.5		55.6387	48.7691	37.1569	58.0731	36.8771	14.9336	34.4599	29.1616	40.1174	30.2597		87.0189	88.4947	93.0729	91.4899	87.5209	67.8506	72.8094	65.4212	76.5873	94.2222
58		44.4277	46.0049	37.8477	59.5819	39.0059	21.3949	35.1238	27.4486	33.3648	34.0763		77.3932	68.262	82.8031	89.347	88.447	73.6842	69.1037	66.5448	98.2063	98.8251
58.5		41.4458	50.1145	47.1773	55.3774	38.9375	20.9773	34.4018	31.051	42.0132	32.5333		76.1274	80.9019	91.8598	90.8114	82.5001	61.0156	81.0152	67.877	90.9843	86.4384
59		42.6428	47.8504	46.6643	56.3066	38.7788	21.5221	34.9072	27.8455	43.6962	32.8067		88.0553	89.4902	112.355	76.8638	83.9592	62.5725	87.8992	64.3753	95.2662	88.2929
59.5		46.5393	47.6873	50.3952	63.3982	27.5697	14.9639	26.2495	27.445	42.9788	35.3569		80.2728	92.5534	114.318	72.2224	87.2577	52.958	85.3239	60.4374	87.3341	88.0811
60		42.5088	53.2263	42.3957	64.9422	26.071	14.4868	30.7117	27.5889	37.7878	44.7146		83.3786	112.898	126.356	81.5906	80.3126	61.7797	88.3722	69.9332	85.3269	67.8678
60.5		42.3641	55.4115	46.5924	61.9012	30.064	15.7533	47.1613	19.5944	41.8967	44.8108		72.2492	101.369	126.199	75.3929	82.1638	78.1794	87.6056	61.4605	90.5118	94.5643
61		41.9516	52.1923	48.0239	58.3479	26.5764	14.1455	40.8528	22.5353	39.0281	45.5715		85.2759	96.7975	102.679	101.004	79.8418	73.2628	85.5289	63.7537	81.4474	87.968
61.5		45.7182	57.8414	29.3405	55.3673	46.1961	16.1663	42.5038	24.6074	48.6188	40.971		63.4231	92.8598	98.0624	91.3815	71.3393	80.4597	69.3723	59.5897	95.5713	93.6219
62		41.1082	52.0077	37.9379	55.0896	20.3632	14.9636	36.6337	24.8784	42.2031	45.5463		82.274	103.685	106.565	96.9939	81.802	70.4019	77.347	53.4378	66.9515	95.5958
62.5		42.7418	49.6561	28.1572	49.5218	29.5298	14.6085	35.8251	16.9752	49.0958	49.2559		86.4586	116.139	116.468	90.8996	72.6355	76.3379	81.2307	69.2178	75.3681	94.8057
63		45.2811	52.5669	32.3143	44.7974	7.22688	23.4526	35.3221	16.969	54.8271	46.1111		90.3406	98.5989	102.341	103.945	78.3128	72.2731	81.8188	66.7853	67.2576	97.5983
63.5		44.2735	54.4327	49.3628	48.4428	20.1938	22.7297	44.0747	21.194	57.8403	41.6098		84.627	108.853	95.8425	82.7947	69.2906	100.306	87.8946	69.5666	80.1143	94.8225
64		40.2075	57.2992	48.5566	52.5042	29.1315	19.6828	43.9	23.4171	53.6887	42.8729		66.4571	89.9678	78.1375	75.1201	82.4537	68.848	68.6021	79.2423	77.7149	90.0029
64.5		34.5735	53.517	48.2098	50.91	7.88955	15.3392	42.2786	17.7553	56.7768	35.3543		64.8302	92.9619	81.8723	74.3035	83.3902	59.6618	70.2548	89.5168	71.2628	105.732
65		40.6294	52.2743	56.2358	59.6102	23.7867	21.2783	29.7553	16.1381	59.8317	33.7239		74.7178	122.668	85.4112	81.7561	82.7509	52.1215	77.1883	69.795	102.115	96.7098
65.5		43.6027	46.9742	55.4603	59.7099	31.264	22.595	36.3409	20.2204	75.0961	32.9183		109.066	92.3396	73.358	86.3	87.0558	62.8779	72.642	68.7265	88.6719	96.1208
66		45.1957	45.5649	52.9801	61.9029	39.6044	16.6505	34.7682	19.6481	76.8553	33.4803		98.5035	86.6801	69.7314	87.9131	76.5962	67.2672	74.5092	67.7957	108.313	97.2657
66.5		42.9613	49.7812	50.1476	65.4836	19.9997	18.0662	38.8255	18.627	77.2025	28.6292		92.9596	93.5909	78.7823	81.5126	68.6805	90.3708	78.0954	66.9229	101.188	85.9134
67		44.7329	45.0807	46.3279	65.6578	27.1834	16.9571	37.1229	18.3468	76.9879	30.7472		97.7837	104.734	103.501	77.3846	80.9184	78.1479	88.1002	68.7857	103.232	92.8987
67.5		41.9224	50.9537	43.9128	65.7537	45.8212	18.0038	38.1332	18.8016	66.3622	26.9404		92.9468	94.1381	106.639	81.9145	85.871	66.7654	78.5504	83.0967	96.8689	87.2245
68		44.1346	46.0081	43.8658	67.8621	24.033	13.173	35.9874	18.6753	53.2098	24.5088		94.9346	92.669	89.7431	83.6919	102.798	64.5118	82.9328	62.615	80.9623	74.861
68.5		34.2456	51.1458	36.8215	73.5983	27.6717	15.3558	37.7854	20.249	51.4334	30.0744		86.9869	98.4357	80.9991	77.5239	94.8536	71.4095	71.1194	80.6051	69.4665	82.8337
69		43.731	47.1838	36.9479	70.8517	30.9297	12.8393	34.8547	24.2763	54.68	29.3189		85.522	115.176	94.6154	103.246	77.9211	80.2381	71.9616	79.9074	72.7503	92.227
69.5		39.9212	46.3675	36.1289	74.5154	24.3082	12.3139	33.2226	20.3851	61.0425	26.7107		95.8329	110.242	86.2336	70.8732	70.6643	65.6788	66.8245	71.0444	86.409	102.212
70		43.0304	47.5121	29.1718	67.878	29.9603	15.7491	37.6263	23.3565	61.0812	28.0733		95.5088	114.773	107.215	66.6643	67.3638	77.606	80.7488	71.6258	84.3066	78.5698
70.5		48.143	45.3267	29.9759	62.1006	39.0676	18.2366	38.7873	22.7854	50.3588	25.0318		92.285	68.2531	104.156	67.0936	84.4103	70.9527	73.2489	77.5959	85.0246	69.5342
71		47.5834	45.2817	31.0023	62.0861	30.6837	18.2014	33.2509	26.4858	59.9842	30.2785		75.1375	89.5166	102.3	55.8593	88.0818	90.9152	81.3949	66.9364	93.5348	86.0274
71.5		49.0991	42.7395	27.3131	56.6875	43.1611	18.5005	44.4894	22.5524	55.8669	29.291		92.3764	112.108	96.0648	64.6552	89.6276	76.822	83.4071	76.6195	106.104	113.303
72		46.102	43.0964	31.2928	51.3162	36.2273	19.4556	50.4408	25.1712	57.8274	28.12		103.037	123.226	87.6181	71.5804	83.686	76.8008	77.1941	76.8542	110.472	110.451
72.5		43.9319	46.0787	30.4146	41.935	45.9027	18.4723	56.7217	27.3325	55.3443	33.3423		81.4734	128.345	79.7075	73.1254	82.1149	70.1106	81.1901	80.712	100.4	89.1798
73		44.9971	43.6597	37.9044	42.8682	60.8596	18.6974	50.939	24.2058	66.9137	31.0158		96.0404	113.565	73.6402	92.2646	73.9408	62.5862	88.9385	86.3287	93.8689	102.413
73.5		47.6474	44.8983	33.4155	40.9792	46.9431	17.1582	45.8278	27.8369	56.1287	28.094		105.118	108.853	81.2654	69.0314	75.4778	77.6746	71.5445	93.7786	95.1608	74.7013
74		48.3927	44.4047	36.2446	45.8159	42.8206	25.8719	38.3745	30.7215	64.5615	33.8635		93.9504	102.268	63.1544	70.9104	84.6542	86.893	72.6878	81.7599	83.9218	73.3069
74.5		46.1002	44.0181	33.1078	62.3174	44.1433	25.0731	34.7685	30.0117	61.1437	35.7299		110.426	110.261	89.8204	67.3592	84.0963	70.9108	96.2958	79.2633	98.836	94.3758
75		42.1952	41.0534	30.8774	55.3024	44.8228	28.6171	47.7068	21.5416	62.2993	30.9446		104.524	106.824	80.0184	68.7686	81.6559	63.4009	70.4318	83.7182	95.9185	87.4488
75.5		47.6887	39.0561	37.1244	47.7563	41.9236	28.6502	46.8219	20.8835	55.2314	33.739		108.567	96.3668	98.0516	65.635	74.9087	68.3445	75.2735	67.396	96.8697	68.4768
76		49.8121	41.2718	29.6626	47.9923	52.3387	25.8255	48.8667	26.7941	54.184	36.1832		92.1839	117.942	65.8971	62.8441	74.6693	72.9114	100.795	65.3968	98.8148	68.98
76.5		51.686	35.5509	31.0823	46.3609	49.4103	25.3854	50.6571	30.6066	70.3897	40.4816		86.4138	95.9562	82.8808	87.7306	78.2977	97.7031	62.2059	70.8087	96.0572	86.3963
77		48.7989	41.4034	33.9395	56.3166	20.6806	29.0447	51.7811	27.1601	72.404	35.6211		104.759	68.9469	96.0025	85.8541	74.9797	80.2175	69.4838	72.5925	97.9901	92.9829
77.5		50.7045	43.7215	37.1485	47.7995	35.688	25.107	51.4241	26.6917	70.2695	37.3727		113.673	72.4006	101.9	84.4647	73.3749	84.0996	81.0225	72.7777	96.4744	79.4461
78		48.3879	42.0239	35.3044	54.135	23.5669	24.2027	66.8588	29.2125	67.1893	37.0628		103.994	108.678	87.9399	78.1035	64.7323	78.0707	71.382	66.5606	102.929	66.5203
78.5		46.8578	41.8937	35.7755	46.5758	23.6401	23.3514	76.8665	32.3394	67.3023	35.7651		75.7514	110.879	80.6304	78.9716	68.8132	78.4741	75.3115	73.4851	98.913	66.7444
79		45.4214	40.1799	32.2833	51.0245	28.4082	21.1872	65.0582	25.7	70.1038	43.4268		82.2812	81.1132	86.2989	80.525	63.77	78.4943	61.8765	81.3181	79.0703	73.2614
79.5		37.8933	39.8164	35.6672	56.9496	19.0844	20.8782	57.4742	26.7379	66.7105	39.5528		76.5404	91.0705	75.6259	95.0057	85.4998	86.5678	71.7568	90.2649	75.5714	83.1839
80		37.5941	37.4456	33.6153	49.6056	52.1603	21.6863	58.9993	29.5345	73.4909	44.4803		80.8484	93.4416	64.2213	100.534	83.9342	67.8558	79.3996	82.7167	80.5237	83.477
80.5		31.7724	39.317	27.9802	49.9904	24.7925	14.3236	67.103	30.1462	81.6371	34.8525		93.1502	86.8001	73.3353	95.6319	75.7946	59.7669	79.8921	79.1486	69.5303	71.7843
81		35.9568	42.197	26.7264	54.1697	36.071	17.7744	61.8389	30.3685	86.1608	32.2913		91.6609	61.5229	64.4392	89.9739	82.0042	62.5133	73.5322	78.0834	72.501	83.0678
81.5		32.0889	43.1693	26.5013	52.4974	21.8912	20.8834	55.1865	21.5143	85.0374	35.3773		69.0245	69.3502	65.8897	84.6786	78.3071	57.5537	77.975	77.2275	99.5601	89.2676
82		29.3294	42.5443	25.6944	54.8567	23.6312	20.924	51.1434	19.9998	89.1861	35.6845		69.385	73.6016	85.6497	96.0123	88.2499	63.751	68.9653	84.8881	85.763	90.0202
82.5		35.9542	44.0643	27.0272	56.9614	39.6544	16.1092	56.3824	22.9905	85.1572	35.4107		72.8087	75.533	78.9136	69.229	91.8269	87.9274	80.7602	74.5169	74.2897	71.4317
83		36.921	46.832	30.5894	58.4609	54.3157	14.0252	60.6316	24.9262	81.4224	36.4563		82.439	79.4857	85.5635	90.6513	78.7378	75.9819	87.8289	76.9268	68.7523	85.6433
83.5		34.1017	46.7815	32.9021	58.7835	50.5318	13.5997	55.4135	27.479	84.7476	39.526		85.7579	97.2542	67.746	85.8746	89.2899	79.2083	81.8013	77.8863	79.1351	94.0334
84		37.3577	40.5949	32.2115	55.7743	37.101	15.9355	58.8473	26.6725	84.1256	28.3886		72.6911	106.354	79.7568	98.4503	79.7341	59.5573	79.0551	77.5381	78.6306	87.2088
84.5		33.7992	41.2832	33.7344	52.8341	26.5109	17.6596	56.3045	29.5115	96.5194	29.8373		81.7783	89.0659	99.421	95.0947	89.3644	60.756	71.0635	82.2014	70.5858	91.3251
85		34.6763	37.5741	32.2161	52.959	28.9865	18.8866	68.1124	29.4073	90.1768	28.4482		65.0008	113.114	84.643	86.9126	99.8477	68.7794	85.2042	75.7413	85.9654	88.1191
85.5		31.4914	40.3337	30.2518	62.8288	50.3086	18.0852	65.5478	29.0342	72.5999	29.8984		72.6473	117.539	84.8619	94.885	76.6156	66.8927	79.1116	70.8181	94.8122	81.8447
86		27.1654	38.753	32.7112	58.4615	63.7817	16.4155	63.2552	24.5178	88.6508	26.3799		75.0805	106.542	92.9108	92.4509	91.9703	89.1526	81.6895	66.1305	84.7732	77.9301
86.5		28.1793	37.1207	34.5175	54.2894	29.6785	15.158	57.3911	29.0689	91.9954	23.3096		78.6202	109.676	86.5252	78.822	89.6534	61.7933	79.6043	68.3638	66.1735	73.5444
87		32.4121	41.6654	37.2569	55.9468	58.0675	11.9291	74.1154	24.0219	90.8556	23.3859		92.7348	118.317	106.102	87.6932	80.2794	57.742	79.5848	59.9627	55.9056	73.511
87.5		32.2981	40.4265	39.0839	55.2873	40.8579	15.905	63.5284	25.556	100.808	29.8198		57.285	114.626	87.1896	109.483	79.8534	65.1305	85.5921	73.0275	51.7588	98.824
88		27.8306	40.5746	34.3564	57.682	29.3311	13.6172	57.4993	24.0698	88.5428	31.431		73.1398	110.556	75.8273	91.4196	68.499	75.2735	69.1906	66.5787	78.5312	102.37
88.5		24.8788	40.0954	35.2767	55.7619	46.0924	19.5585	56.6343	23.4292	83.9873	34.1043		74.3065	101.8	91.9822	91.1805	66.0031	72.0264	71.1607	69.6105	66.0369	89.1418
89		27.9708	40.7751	37.8255	65.3965	28.3266	15.4884	55.4058	23.1528	76.0819	36.4462		75.5352	99.2266	85.6971	92.8711	73.842	77.522	71.0858	61.8923	74.1881	84.2416
89.5		29.1239	39.7935	35.5648	74.1105	32.5387	15.9882	47.9326	27.545	73.0098	41.5639		82.2978	76.0695	78.8355	95.5744	80.5595	90.8258	75.2592	55.5284	98.087	74.8713
90		34.0424	38.3681	30.6622	68.4785	37.7543	16.0407	44.2908	22.3244	72.8286	39.0803		93.5131		74.5065	89.6706	66.5086	96.6704	81.6499	71.2509	88.8374	69.8699
90.5		32.747	40.978	32.2805	65.5667	27.32	15.4288	46.0136	27.3155	79.7813	40.31		101.923		82.6339	94.3275	65.9517	94.5655	68.7534	64.8838	85.5732	74.7472
91		32.8077	44.0623	32.5191	70.3686	29.201	12.9192	45.9777	24.7914	76.0842	37.3925		78.8188		63.4682	99.2968	70.0427	83.3817	74.4885	65.2057	63.6968	101.063
91.5		29.8267	45.6333	34.8791	67.7654	31.4159	13.4429	52.3691	24.5022	76.6049	39.4847		62.7725		72.4709	89.899	74.3949	75.5701	75.8756	67.7153	68.1218	75.0348
92		34.9907	42.5866	34.3539	64.9829	36.9465	14.9656	52.4063	20.1952	66.8077	36.9237		56.2366		57.9226	91.4607	68.2805	79.0223	64.8122	66.9319	69.6578	102.704
92.5		32.8397	38.7924	40.2904	65.7493	16.3839	12.8739	43.4679	28.2803	71.8022	40.6187		78.5241		76.34	101.367	63.4295	86.4477	66.8916	59.1032	83.9995	75.2384
93		27.8931	40.3112	35.3007	69.1063	25.6124	13.1527	40.1669	31.7108	83.6054	41.9005		80.7122		67.1816	102.74	61.9689	77.9734	69.9117	65.3429	91.711	67.3741
93.5		33.3634	49.8584	33.4645	63.9015	24.5756	13.8716	36.715	25.1556	80.8506	45.7854		66.2756		82.3484	107.493	60.9302	68.3871	69.8471		85.5918	81.8317
94		32.1035	45.6988	29.3951	65.9557	44.1118	16.7181	42.329	29.4073	84.136	43.4499
94.5		29.1793	43.2529	34.3154	67.0826	41.8602	13.7708	44.5181	24.6354	76.9513	46.253
95		29.8412	42.0209	30.53	68.4552	32.5678	10.359	43.1014	21.0965	88.3288	41.1747
95.5		31.1769	44.3619	30.4298	63.0515	39.214	10.211	39.3699	21.9097	77.5257	42.2884
96		27.9256	47.7961	28.3834	58.209	31.73	8.61017	58.0395	25.3458	83.081	40.1008
96.5		27.8672	43.9938	31.1639	59.3465	54.2911	6.49374	54.4162	21.5275	87.4151	34.904
97		29.9261	40.1481	32.8497	54.1177	34.5674	6.55053	44.9519	23.5462	88.6676	28.4225
97.5		25.7312	43.5482	32.0371	57.325	32.9748	3.34958	43.9999	20.2284	92.1807	32.7557
98		28.7417	45.8024	29.3321	58.9482	40.6653	11.1559	52.5633	18.9643	89.1848	33.9462
98.5		24.8918	42.8526	34.694	50.9354	31.1867	6.34483	57.2062	19.2669	85.9629	37.9805
99		23.402	49.2806	37.5491	57.7464	40.8491	3.15513	58.0553	16.7387	70.3239	43.085
99.5		24.4958	49.0698	32.7244	48.6041	37.5703	6.35461	54.951	10.9875	83.9616	44.1349
100		19.1613	46.1711	34.9043	45.4601	37.9851	8.29878	55.6511	11.9306	95.3931	51.8908
100.5		24.8647	54.83	34.1681	53.3053	44.8713	4.09834	48.7513	13.7827	90.5095	51.3108
101		27.0431	44.5094	31.3721	56.2554	33.0263	8.59169	51.9022	17.4455	69.3224	54.4224
101.5		29.7316	40.3817	35.3597	52.7035	42.5434	9.58229	68.9325	13.2404	72.9569	54.1331
102		33.8057	40.884	35.7403	43.4691	52.278	6.37956	53.6443	17.2501	72.1596	52.958
102.5		32.1549	40.6479	32.1172	44.3636	39.2263	9.25746	52.1532	16.4877	64.1028	59.7256
103		35.2654	40.2997	32.0711	52.8914	31.9492	9.12426	45.0959	12.8357	72.264	57.3417
103.5		31.6127	36.2113	32.9433	54.173	25.2138	9.50962	47.2776	18.4031	74.8048	65.2121
104		34.7957	33.9513	29.8134	54.5535	53.5173	13.0164	41.4515	18.7345	75.5114	59.7978
104.5		34.8388	31.0596	27.8071	54.4624	36.4885	11.1431	53.5053	18.7526	62.5201	59.9822
105		35.708	34.9902	26.2246	64.801	38.7663	14.07	37.5897	15.985	68.9922	56.1093
105.5		31.3314	38.2364	27.3347	63.191	45.5234	14.4975	48.5128	17.8529	63.4148	57.1654
106		27.0643	39.5849	29.7316	64.8201	14.7345	19.0597	46.0661	22.0352	72.8095	58.7191
106.5		28.7432	40.3518	28.8841	58.6354	34.0799	15.5564	37.4414	20.7739	65.4211	65.1547
107		35.0124	44.3616	29.0686	57.3971	32.5284	16.7238	35.2993	17.8682	62.2183	63.5861
107.5		34.5428	51.7166	26.7804	62.5687	30.5998	14.575	42.1076	15.0242	52.4469	68.616
108		32.5118	53.7381	26.8241	63.3994	19.45	10.8774	45.1032	14.6956	49.2587	61.8198
108.5		37.8846	48.848	27.5437	67.7196	26.2753	10.4685	30.1395	15.6611	56.05	67.2512
109		31.9341	53.2611	26.1018	72.2581	16.9008	12.8722	24.5502	16.4209	59.586	63.356
109.5		30.211	46.1114	24.8367	60.2023	15.4257	11.7152	20.9067	13.5328	64.7716	64.5048
110		37.2151	48.5954	26.5244	62.2774	25.1705	10.8271	30.4073	15.2209	51.2917	61.7933
110.5
111
111.5
112
112.5
113
113.5
114
114.5
115
115.5
116
116.5
117
117.5
118
118.5
119
119.5
120
120.5
121
121.5
122
122.5
123
123.5
124
124.5
125
125.5
126
126.5
127
127.5
128
128.5
129
129.5
130
130.5
131
131.5
132
132.5
133
133.5
134
134.5
135
135.5
136
136.5
137
137.5
138
138.5
139
139.5
140
140.5
141
141.5
142
142.5
143
143.5
144
144.5
145
145.5
146
146.5
147
147.5
148
148.5
149
149.5
150
150.5

## Sheet: Figure 5E 
immobile fraction (%)	UNC-33S::GFP	UNC-33SΔC::GFP
w1	61.1984	16.7833
w2	55.5057	1.04995
w3	64.4802	11.1191
w4	42.5113	14.1368
w5	65.3243	18.3903
w6	83.8177	26.8576
w7	55.8188	24.7122
w8	75.9367	28.1325
w9	32.9989	16.8315
w10	61.0666	15.0541

## Sheet: Figure 5F
		UNC-33M::GFP												UNC-33MΔC::GFP
time(s)		w1	w2	w3	w4	w5	w6	w7	w8	w9	w10	w11		w1	w2	w3	w4	w5	w6	w7	w8	w9	w10
0		0	0	0	0	0	0	0	0	0	0	0		0	0	0	0	0	0	0	0	0	0
0.5		8.08391	7.13778	1.152	6.44647	8.08598	-4.76972	4.51774	6.81485	7.92387	6.90089	2.57123		23.4564	16.4317	22.0666	14.0579	18.7688	31.9183	28.5589	23.0198	10.1346	18.5013
1		17.0649	15.5556	6.07286	7.5647	5.68031	4.41245	4.76973	-10.1903	7.68166	14.7196	19.3859		41.0289	30.4499	15.7668	19.9966	26.4899	75.4024	34.5315	30.9057	13.0583	19.0628
1.5		18.0395	9.5219	15.5647	5.69041	8.03464	-0.909062	13.9072	7.58322	13.263	14.7761	30.3681		30.9971	36.6439	29.8637	22.4466	33.2671	65.3418	43.136	34.9463	27.852	49.4603
2		24.5131	10.1613	15.227	10.6598	18.6677	1.89354	8.27035	-9.01372	13.934	13.803	25.6749		36.4185	68.3697	38.0229	27.4753	34.0388	37.287	51.825	35.9902	27.531	53.9348
2.5		28.3139	14.9431	12.8731	14.1622	21.1084	0.692125	21.4764	8.59469	16.4531	18.7771	24.3855		55.3586	68.6389	41.4817	31.7691	37.6016	52.4286	54.9926	38.5939	36.4213	48.8109
3		28.012	12.9225	28.0864	17.3064	10.7305	0.705412	9.98125	10.9145	12.4939	17.3795	22.6157		47.1302	65.8949	37.3192	46.6446	39.1128	53.7394	53.6046	56.4028	55.3816	75.4655
3.5		32.2829	15.526	18.82	17.1209	43.0211	7.24461	11.4227	0.684052	11.9582	21.6739	35.3689		40.8739	70.5873	42.9187	44.4201	36.3829	49.4967	57.3258	38.3512	45.8899	52.5715
4		34.7266	15.1076	22.337	20.8104	20.2683	7.85668	11.8745	4.77471	19.0618	18.3581	34.4934		42.6789	63.9658	66.9362	52.7726	39.6296	69.0964	60.9554	42.0282	50.1489	40.5073
4.5		39.9114	19.6436	17.1482	20.3496	28.6782	9.43539	19.0318	8.93475	14.5201	11.9774	37.7515		42.1094	75.6465	67.7655	58.837	44.3473	70.9446	63.5969	29.8642	54.5488	40.4793
5		36.4922	21.1992	19.6611	22.108	34.0451	3.49381	27.4002	4.75022	11.6202	10.8505	37.9804		56.474	79.6642	78.1912	55.3953	35.8714	59.9805	50.7779	58.3647	56.8994	30.7405
5.5		43.285	21.9962	33.4381	26.788	17.7604	9.16111	28.0079	1.13038	15.4695	14.1646	36.8154		36.4062	47.4764	86.5482	57.3045	34.5539	40.627	51.7728	61.2011	46.5328	32.6864
6		45.2682	15.3495	23.1665	28.2028	28.9221	10.2397	21.4932	1.70997	11.4271	10.1254	38.5092		50.2918	46.4609	91.8199	56.2038	34.8871	70.5368	57.3681	49.465	62.4651	62.4998
6.5		41.9035	22.6901	25.7892	27.7671	39.6374	5.25255	18.5929	0.910265	17.5521	14.376	41.7188		52.9258	69.6612	85.0611	54.4151	33.5998	71.411	53.6952	56.289	69.041	71.3707
7		43.395	43.7116	23.4982	19.3113	21.138	15.2922	11.5075	2.87354	22.9842	21.9548	28.7816		53.9701	78.8711	85.3621	53.1268	44.1341	74.4983	62.3413	63.5921	71.178	48.4849
7.5		38.6348	28.7176	18.0828	25.1593	21.4207	14.6229	2.79934	0.991874	17.3773	20.716	31.9785		49.964	42.482	75.2463	54.6971	48.2158	64.6842	65.9893	55.0544	76.7311	58.146
8		36.8945	22.6179	27.8666	20.4428	22.2981	19.5908	27.6225	3.3292	22.7111	13.5706	26.7622		46.0613	76.6514	77.6288	60.3966	47.7559	67.0191	72.2614	59.3948	75.7348	70.0288
8.5		38.5345	25.4696	23.2473	17.1186	24.3617	22.5923	25.4305	11.7742	25.7553	19.5497	31.5896		46.9251	81.4697	94.6942	56.8413	56.1518	65.9472	60.0941	59.4749	92.0894	84.5863
9		38.9277	28.4172	11.5481	20.2495	25.3679	17.4394	30.5802	7.72399	13.2	13.4737	29.6728		45.0214	84.8666	84.9653	71.5361	60.2273	94.1495	77.9284	52.9338	74.4514	78.2248
9.5		42.8338	22.9919	26.5666	27.8517	37.7872	22.1309	30.0323	1.31485	14.6179	18.3366	33.9028		48.3308	79.211	55.3252	68.6969	60.5384	95.0222	69.9361	49.7027	79.9052	64.4346
10		42.5938	23.5483	31.0693	29.0439	25.049	17.8006	30.2108	0.706701	13.1001	15.0063	39.3076		43.6607	92.787	63.7052	71.3526	49.508	78.853	72.3061	49.0076	74.043	67.0235
10.5		46.5373	28.7457	19.9474	21.3878	25.4089	13.3958	36.3202	12.1369	20.6415	23.8519	46.1424		40.7208	71.0066	83.8161	62.4313	45.68	77.5985	63.3875	76.5319	72.9984	73.3314
11		42.3839	32.7821	7.83433	23.5297	24.7979	10.8306	36.0875	8.39724	20.0998	15.389	38.8642		45.8123	80.225	90.9172	71.7547	50.4891	92.4269	70.1394	79.6924	72.911	71.6458
11.5		40.2057	34.5145	16.6698	26.8172	17.3661	6.4413	25.5805	3.87141	28.348	16.7737	27.8918		39.5429	74.7345	77.4089	66.8405	64.0915	100.751	83.09	64.9262	75.1014	55.683
12		45.4652	28.6166	24.0906	32.807	32.2021	14.4019	21.7363	10.4693	21.5379	15.603	32.6276		41.7078	75.1259	74.8206	64.5317	62.0089	74.2032	73.8044	60.6101	62.6598	58.0696
12.5		46.128	33.8185	27.9729	32.6871	37.9177	7.0782	23.7111	13.2651	16.7869	16.1367	32.3793		54.5019	86.3082	78.6034	67.8302	59.4407	61.717	69.3901	67.356	67.5954	85.2055
13		49.8983	29.328	7.23822	36.2592	26.0999	11.867	24.7197	9.95728	22.4731	19.914	43.7739		53.6144	89.4437	68.1068	68.4832	70.6458	61.2586	64.7537	57.9721	59.4985	75.3658
13.5		50.1529	29.6338	22.7444	31.0902	30.3562	16.5103	23.3642	10.0803	23.6817	22.0363	43.1623		45.253	86.5105	69.0834	62.3124	57.4427	64.4267	61.4608	76.3475	78.3729	80.7208
14		46.2602	26.4301	31.8314	27.301	26.6238	9.4283	27.5696	20.3828	25.0201	22.306	37.8662		42.9312	73.0349	66.0841	66.0118	57.9701	68.8304	54.8289	69.2496	67.077	84.4425
14.5		51.6324	32.3813	17.856	36.2649	25.7474	10.5074	29.8161	7.43011	22.7565	21.8086	44.1529		54.017	92.0017	81.2291	73.091	65.4453	61.9725	63.6193	76.0795	71.1772	84.5367
15		55.0884	43.3387	14.6024	45.0364	20.543	12.2846	31.1015	5.7572	17.6965	15.905	43.8713		43.7969	91.4995	75.5014	57.9062	62.6536	56.7224	65.9268	53.6939	78.6026	75.5863
15.5		49.553	37.9639	17.2369	41.2569	13.3797	9.09772	23.4809	15.2362	30.455	23.3099	38.2793		49.003	85.4708	76.433	69.3783	57.2168	59.9792	71.2227	49.8982	73.2815	104.506
16		49.2635	34.2214	19.3037	32.3799	27.1526	16.3228	20.3083	11.8292	32.5514	20.4514	34.365		38.9317	88.2179	113.54	65.7123	49.1942	69.488	59.4989	38.3093	71.7317	72.7733
16.5		46.1212	31.8823	20.1579	34.824	26.3792	12.377	32.8376	7.99238	34.3409	22.3921	33.6996		45.8568	96.6033	85.8395	68.2769	45.3748	79.5849	76.8453	66.2097	83.325	83.3305
17		46.7641	50.2995	25.1856	32.9632	24.5029	21.8046	32.9058	1.29976	31.7471	20.5947	41.0022		43.8603	104.525	74.0882	68.4646	51.2619	86.9196	80.9443	52.9746	89.9452	88.5215
17.5		44.7083	38.6991	21.8868	30.2231	26.7912	26.2987	30.3856	13.7826	28.7613	28.2256	35.6154		41.1035	73.4441	96.261	73.0823	45.5134	91.2877	92.301	59.1234	92.2966	68.6349
18		46.63	46.7355	17.2483	45.5821	40.0465	26.5768	27.525	12.4299	25.4456	26.2554	41.0827		46.0259	105.185	97.0173	75.7216	43.4209	59.4076	84.4942	61.6411	112.812	100.223
18.5		46.8932	54.0375	39.035	40.8039	43.8186	31.9139	28.2939	6.48495	23.8553	20.6217	40.3572		44.827	100.473	91.5683	69.2415	54.7119	71.5244	86.4555	76.6338	94.4104	76.4089
19		44.4325	36.9236	32.3412	33.9183	35.881	27.5892	28.7767	7.72085	28.6619	17.6794	40.3578		43.6	76.9453	106.828	65.4916	42.7558	87.3598	85.6603	63.5113	94.3825	90.7223
19.5		42.924	49.4572	38.8404	37.8885	53.0289	27.5886	28.1009	2.69626	30.6103	24.0402	39.1908		51.2676	102.916	87.2545	70.5169	43.5151	91.7656	78.2137	60.1666	105.661	70.0552
20		43.0514	63.9418	23.9189	29.1177	33.3958	27.9544	24.2097	11.4158	29.414	17.0027	35.9613		49.754	91.9015	95.8065	87.5123	46.8668	75.1979	79.3508	53.9588	91.4267	78.7405
20.5		45.9841	78.544	28.8241	37.4057	48.3744	16.7086	21.7328	7.52656	44.5264	19.7104	42.8604		54.3118	90.1692	97.3922	73.5999	55.3908	103.311	70.7616	56.7557	68.28	77.5181
21		44.8406	55.2434	14.5302	45.318	37.4986	16.5171	24.8094	10.7978	40.2866	17.0916	30.1075		49.6386	97.7633	65.8535	71.8561	61.4915	78.3624	71.255	62.0337	69.7338	62.443
21.5		39.3189	57.1774	12.2307	38.832	25.8641	17.754	26.2629	15.172	32.9248	25.9126	38.7303		53.2811	87.9935	68.3173	81.7746	76.4386	87.8577	68.1601	54.398	85.3772	56.0821
22		39.2817	55.4578	27.95	32.5502	37.1816	29.3946	16.9864	12.8062	28.0535	15.6654	48.2547		54.8552	70.0538	52.7558	76.3372	76.3873	106.013	79.2371	43.0432	88.097	39.263
22.5		32.1294	52.1474	31.0385	41.4459	30.2421	24.9992	13.1859	-0.290456	28.8902	18.8756	40.8644		58.7037	53.5242	58.5188	86.5468	73.4813	96.7952	83.1801	62.3146	98.8239	34.4162
23		29.9106	51.0309	11.5882	37.2833	33.5061	40.5313	14.4832	12.734	23.4052	19.8692	43.4281		62.3307	72.3147	77.6569	82.1233	66.2162	108.415	76.2083	51.8452	94.1339	40.9858
23.5		32.6046	48.4035	16.0525	27.1378	32.0677	35.1813	23.8728	0.440541	29.6505	24.3816	40.2562		52.0902	71.6309	85.5927	82.4289	61.5858	111.9	76.2511	61.4326	84.3575	46.8193
24		34.6266	53.9953	28.498	39.7376	25.0285	30.8816	13.2331	10.2273	29.7824	27.2858	35.2311		52.2767	57.0989	89.1133	88.766	61.3172	103.652	86.9108	67.7972	91.7034	89.247
24.5		32.9838	51.9675	37.9602	35.2676	23.1889	27.2346	19.1663	8.71541	37.6823	20.1875	38.4575		60.5843	64.3342	68.0759	85.5107	63.7172	129.604	74.7933	67.7755	86.2167	119.756
25		37.7359	56.6087	34.6995	39.628	20.6848	15.1849	16.5289	10.5736	44.4455	12.1466	35.5738		61.593	44.9988	71.0101	83.9985	63.6744	100.444	77.6221	75.6982	101.903	75.2905
25.5		37.7163	53.4158	23.2164	39.9707	26.0395	21.9853	25.1246	5.38111	39.4561	21.8538	35.4991		57.5941	43.0202	109.942	82.4307	60.496	99.8512	73.404	107.71	85.7013	61.0406
26		30.3558	39.2373	28.7593	39.0437	27.8032	19.1076	24.8077	7.94394	30.6238	15.7376	46.483		54.9798	77.2845	67.9919	76.2395	62.8606	105.047	76.5713	97.9025	91.9007	57.7482
26.5		31.473	53.5681	18.7246	48.1735	25.9342	21.9028	19.8858	1.74278	34.386	15.9721	48.093		79.5997	58.8692	103.749	74.3578	66.5979	98.0863	70.5638	86.5613	72.7385	62.3322
27		36.7418	54.5152	25.9161	52.6396	23.524	21.6447	17.9361	11.7505	41.3484	15.3859	50.9431		67.0183	65.8074	82.7225	77.4667	75.0112	108.994	91.0008	84.6857	54.2815	57.4184
27.5		34.9381	54.4281	28.3135	36.9997	30.5214	15.3887	26.3136	16.2735	35.0485	10.3099	55.5225		70.2546	43.3763	83.2582	77.3553	84.6099	79.8134	78.4772	103.384	56.9316	63.8286
28		43.128	38.9923	21.9135	42.5722	32.5147	25.7848	24.6361	3.64809	33.4817	20.2371	43.8799		53.4457	54.5784	96.9561	80.9038	70.3096	105.468	71.2638	85.3269	60.1758	50.4543
28.5		40.6843	32.9155	32.0729	49.4916	25.9937	25.5429	34.3538	13.2766	28.1003	22.3607	45.4187		50.6018	44.6078	98.2975	93.9106	63.3219	91.3861	77.8044	65.5179	68.6582	63.3965
29		35.2494	53.2126	24.9842	40.0242	24.1537	35.9992	29.543	6.36216	31.2098	15.768	46.9798		62.8279	59.7783	102.386	87.9784	58.0783	90.175	71.7859	84.5108	73.6057	66.4118
29.5		39.0515	34.0872	24.6442	49.2427	26.1496	36.1746	30.4249	10.2969	38.3516	17.4664	45.6345		56.7928	55.0676	97.9491	87.9157	69.9544	108.325	81.2009	94.1355	78.4305	76.447
30		41.3429	45.6577	22.8636	52.2982	23.236	36.0407	28.3952	14.3446	26.3164	8.69428	49.2832		57.2456	64.2213	110.511	91.7154	65.081	122.434	80.5474	87.8445	87.6077	76.4568
30.5		38.0638	45.5216	29.4185	47.0659	21.5992	40.0859	37.9567	10.4707	23.4724	17.9101	52.3151		59.3528	66.6157	122.289	93.4413	63.6364	105.647	68.9115	87.9616	77.1124	99.4005
31		37.5603	37.2477	28.2469	46.7645	21.854	36.0749	25.7144	6.39991	23.2417	15.7943	48.1856		72.226	73.2291	122.434	97.2349	63.2823	113.266	65.2638	84.5327	80.6523	102.747
31.5		37.891	38.1606	34.3124	44.4612	32.1859	25.3659	32.0333	7.95469	27.7529	23.9864	43.3722		59.8664	83.9116	108.995	90.1785	59.797	113.252	79.1906	81.3603	93.5706	126.239
32		39.1256	51.7619	29.7698	47.8316	36.3466	35.8245	28.1263	9.83986	21.4745	25.8103	39.4113		62.5272	44.6929	155.545	78.4712	62.1513	102.425	77.9887	68.9558	93.7796	96.4805
32.5		44.3836	45.9481	27.1445	40.1363	35.8203	30.9152	22.3399	7.96857	37.6005	26.5414	43.7837		62.0641	59.2615	125.92	74.5321	49.675	117.055	79.9811	94.0611	83.8445	96.8347
33		44.7871	34.9577	20.9583	44.0426	29.2865	32.7572	23.2231	18.0957	32.4679	20.1968	48.1583		49.9551	77.3152	124.724	74.9994	62.7272	67.768	86.9139	76.793	81.6237	86.2838
33.5		47.7598	39.6485	26.95	52.6963	30.6962	30.333	27.8672	9.10312	31.916	12.5854	51.7704		63.2049	48.8434	122.003	79.9641	58.4352	94.0941	87.2519	78.4094	104.957	96.1762
34		42.9615	49.7308	25.182	43.4999	26.1484	30.0782	21.5181	1.82047	32.022	15.3239	47.6167		61.2087	47.48	111.538	75.9301	55.8936	108.201	90.383	63.4363	98.3503	67.2156
34.5		54.085	44.745	44.3978	52.8795	27.3553	33.395	26.1057	11.1698	34.49	16.14	48.8823		52.9599	57.2746	94.4181	69.3757	77.2605	103.721	77.5494	69.3854	109.791	56.9309
35		52.734	47.4405	28.1392	56.3442	10.5389	24.1492	14.9471	17.246	37.0335	23.9228	50.9308		32.677	51.6028	107.634	62.8597	84.3015	70.2318	70.307	82.7587	97.7626	66.7832
35.5		60.115	50.634	13.2485	48.1954	28.6993	27.5676	19.9232	5.1325	19.4851	21.6507	46.9616		43.6325	56.6585	108.056	58.6986	84.3882	73.8058	69.6951	92.5939	113.722	61.806
36		55.7758	38.232	30.3147	35.8095	24.5769	31.4918	14.7403	8.44323	23.0462	24.4706	47.8128		43.4335	43.9974	83.867	75.6016	70.9142	78.21	86.9195	79.8389	123.406	51.7118
36.5		55.9066	39.141	36.1849	39.8135	24.1168	32.0666	24.4329	11.4215	34.6192	23.3207	52.173		55.2054	46.9353	97.4942	69.2387	78.5088	117.232	100.745	80.152	102.224	58.3473
37		61.3081	34.8457	25.6767	37.565	25.2605	31.2031	12.3772	7.0853	43.3547	17.647	46.0122		76.5257	49.6163	90.0123	64.2119	67.9054	91.6129	93.0761	63.7404	116.477	46.9044
37.5		56.2815	29.104	33.4691	43.9839	28.5707	30.3708	17.6261	11.6566	38.3983	24.2658	45.0327		55.695	55.4879	85.1577	72.4606	64.8459	94.1746	94.3347	69.7541	116.831	73.8256
38		61.4368	35.1122	27.971	38.4457	24.8132	39.8235	13.9315	17.2564	26.6066	18.5946	44.4489		58.3232	46.0315	99.5448		61.0496	91.1478	94.818	67.0398	115.841	103.115
38.5		57.6282	47.701	28.2385	41.7266	30.1727	36.7923	19.4545	13.1228	24.46	16.3162	56.5362		55.9734	53.0044	85.3258		69.1384	101.751	77.5117	59.2669	114.131	97.8467
39		61.4076	29.9766	17.1817	42.0799	30.011	26.1611	29.3594	10.3119	21.5053	19.6092	50.1516		51.6592	45.8851	85.015		65.5556	117.753	85.5182	66.0309	125.944	80.3035
39.5		55.5073	46.0734	27.5522	42.6464	25.1961	22.1204	18.009	7.94285	30.0343	22.3268	54.6346		47.0953	50.0179	69.545		55.0356	112.102	81.7737	65.9401	126.372	86.8236
40		53.5803	37.4277	18.801	41.3856	43.9307	31.3243	20.9525	9.26817	27.363	21.7405	54.7492		50.3766	40.3851	90.5802		59.1014	102.013	89.5156	73.2435	94.5592	109.657
40.5		50.8936	33.9611	28.1794	35.3638	25.4961	34.9943	17.9041	15.0691	31.1237	17.7111	63.5825		48.7646	59.5871	105.7		62.2156	114.018	76.6327	86.6026	98.9878	121.092
41		55.4513	21.1268	34.9452	34.8149	24.1771	41.4889	26.0798	11.889	25.3808	21.3022	52.0309		46.4165	64.7794	92.5056		64.4348	105.995	83.4018	84.7926	117.25	102.949
41.5		50.0472	29.5931	34.5028	41.5018	43.5257	35.2029	19.4237	13.432	34.1474	20.0346	48.4152		52.7013	37.0095	95.1936		77.4586	83.6106	102.151	73.5453	98.742	70.5175
42		51.219	30.1706	38.2271	35.2347	31.6035	31.7325	31.0557	10.43	34.3126	21.5926	44.6597		42.2936	58.7898	74.0233		87.501	95.1694	89.6904	105.851	94.9862	97.0332
42.5		53.9085	28.75	25.9111	38.0641	23.8042	31.688	25.7782	14.2617	30.3781	28.0562	45.1074		49.6934	56.9445	83.0183		76.7508	101.891	79.2672	86.1523	93.45	72.0136
43		56.8641	36.2366	30.0277	32.4301	18.227	30.9987	19.7751	16.7493	28.0081	30.0668	41.6737		51.2545	53.2848	78.7784		75.8901	91.4739	81.2422	84.6256	92.4697	87.4788
43.5		56.0242	21.3173	18.9744	34.4146	20.4785	27.2903	16.1021	14.1472	37.7861	29.3561	43.2461		54.3204	87.1273	80.6406		61.6287	106.569	84.7972	78.1488	87.348	139.116
44		62.3332	34.81	30.0973	32.0021	17.293	28.8241	16.9122	9.4513	29.8508	29.6457	38.0398		50.5349	91.7128	67.4192		61.584	134.313	75.7044	73.9144	109.602	152.438
44.5		50.5019	28.1484	36.4292	37.7629	33.0184	40.0422	14.4533	9.43241	35.6276	25.1003	45.8362		57.4084	99.9994	79.2503		71.8045	111.662	89.0991	80.203	92.8856	174.777
45		56.0292	28.3276	26.7041	47.1933	25.5244	38.5572	20.2228	19.8037	39.0065	29.0719	44.7257		54.6108	75.5117	75.4285		65.7213		85.3358	110.998	102.076	158.723
45.5		52.604	31.7202	22.783	40.6645	25.9848	36.9963	33.2503	6.14729	36.5418	28.034	44.2796		49.4575	55.9358	72.1581		61.619		75.5301	104.931	82.9958	150.04
46		56.9472	28.8495	21.2147	39.7119	28.6403	31.4807	36.9596	11.5722	29.2971	23.8676	46.9271		63.998	51.882	58.5138		57.7		84.8739	71.8415	98.372	147.01
46.5		67.3917	23.9703	20.7321	33.6724	37.1088	25.3123	23.4972	12.2577	39.2415	21.284	49.3726		72.225	76.5864	81.8751		61.6086		77.0478	93.5314	111.767	136.97
47		70.4605	26.9695	20.8204	30.8332	35.8198	24.7356	33.9395	7.10361	35.4468	32.807	29.6651		42.0625	55.6351	90.4932		60.8286		89.09	81.8251	101.618	151.649
47.5		57.6087	43.7799	29.6084	28.7171	26.2178	28.2063	27.0483	12.0996	34.7634	25.6596	48.8427		34.8637	60.4943	95.5554		75.9092		86.2355	94.7026	118.844	125.139
48		57.9015	31.86	33.4344	35.6427	25.1587	30.5855	20.3472	10.0242	32.0863	27.0404	48.7001		41.3448	68.885	127.017		61.5071		96.5458	68.057	120.754	120.975
48.5		65.2328	35.5322	23.9748	24.6169	37.6969	23.1352	27.4799	12.1074	37.446	27.2115	50.7966		55.2779	45.6553	138.049		62.3264		87.3315	84.9395	113.276	127.6
49		61.8683	30.1417	46.1425	29.9934	22.3739	28.2184	29.6497	16.4721	45.7357	29.9055	52.3152		69.7221	38.8741	90.5429		65.7097		80.3608	68.3103	99.5914	102.696
49.5		53.5449	49.8805	26.3432	33.8297	23.9096	25.9375	29.1845	18.7192	50.5509	33.5152	51.8331		64.3661	61.0653	82.3204		71.4365		76.9056	80.6378	109.921	106.848
50		46.2723	34.4465	23.4167	42.9706	18.0533	22.9948	33.1174	18.0498	43.3326	31.8788	65.4022		54.131	68.1421	89.1664		51.2764		70.2109	75.6187	135.6	123.036
50.5		55.1407	51.4267	25.7796	37.8713	15.4346	32.917	22.0338	13.4275	37.8956	32.7859	51.1769		46.3145	66.6005	105.542		57.3381		72.2203	96.9849	136.692	151.414
51		55.0433	45.1494	27.8318	52.6698	33.2475	17.791	21.0061	5.10384	35.975	31.1882	47.2273		60.3576	63.0499	108.518		68.2037		81.7652	88.4546	123.657	134.65
51.5		49.142	43.3743	31.4921	58.4287	42.5326	28.3208	24.6033	12.4139	24.3461	30.4463	51.3319		60.4286	59.6352	120.476		63.2409		74.191	81.3899	140.988	126.531
52		47.0909	41.6709	47.1359	31.5551	48.3049	22.3013	7.90141	12.5189	28.238	31.1576	45.6941		47.9612	60.9641	100.446		60.2309		84.1454	98.5024	144.723	116.613
52.5		42.0448	36.5783	41.6906	47.7357	38.2755	25.022	21.7515	13.5108	24.3754	23.6402	55.3046		52.8563	67.0319	98.1874		62.2446		88.6993	84.4808	149.129	99.6856
53		43.6835	40.2317	35.7987	37.5569	37.8326	20.9989	17.8443	19.8767	21.3359	17.139	45.6009		61.2311	60.2712	78.4449		48.0723		82.8637	72.59	151.227	102.792
53.5		50.5877	43.5581	12.6962	37.2371	33.0407	26.8683	11.0377	8.04106	30.772	26.7769	58.1627		60.3718	54.6462	85.2586		59.542		73.2266	73.7624	117.468	104.015
54		52.1571	40.0476	25.222	36.3433	36.2476	22.1941	7.06243	16.0068	34.4028	19.7589	58.6997		55.4283	58.5126	66.6915		54.1912		87.0252	85.9407	125.604	91.8509
54.5		45.5414	47.8492	22.6271	44.1942	34.9447	25.4269	6.5812	14.9338	27.7317	19.6595	69.9442		60.5979	49.9571	76.3322		67.3991		92.8682	105.862	128.501	108.567
55		49.1242	43.9833	32.4937	30.9424	36.8434	25.1078	-3.34067	11.0601	23.8393	23.0872	61.0532		60.4893	52.2333	61.9766		75.675		81.6363	74.9273	130.351	70.2004
55.5		48.2996	39.5521	43.437	46.1094	37.9928	34.9166	2.69282	7.86192	36.4751	34.2092	47.7866		57.7678	42.824	74.5153		60.9855		74.3601	79.2017	135.558	118.312
56		45.9161	35.6466	40.4356	32.6297	28.4345	30.0189	-1.8458	11.5342	33.0604	23.0374	51.7233		52.0928	56.1495	92.9162		45.4688		62.6796	83.8153	128.263	110.467
56.5		55.6348	40.3267	32.8358	43.8356	26.0015	39.2914	11.5289	16.1709	30.7344	20.8943	48.8541		49.9625	65.676	93.2557		60.9494		65.2602	86.3059	138.202	91.7562
57		51.85	42.5535	28.7323	48.253	31.2202	36.4752	10.6733	7.65456	42.7486	27.2236	50.6751		51.978	54.6189	90.5328		56.6036		92.2715	75.6169	125.929	72.6455
57.5		46.411	60.1391	28.6158	33.9648	52.3276	36.0159	8.22845	16.7206	29.7976	20.5241	51.8201		56.7391	76.3957	76.0535		50.7273		88.7453	86.3672	108.282	107.07
58		40.3553	40.8219	25.1066	40.7001	38.6872	38.8783	13.7955	9.1778	33.7754	27.7206	54.6256		57.3504	86.8657	78.8363		51.8394		78.83	85.1448	124.83	135.494
58.5		54.5569	52.8927	23.4448	38.1253	31.1247	36.1083	12.6552	17.9044	29.3439	25.9428	56.3648		46.61	76.673	58.3465		51.596		87.1534	88.2247	135.137	132.221
59		48.7641	46.4569	14.8789	44.4945	34.9133	41.3301	13.0368	6.64098	29.1997	26.293	59.6451		59.2014	59.0227	70.6929		58.5691		84.1308	108.218	110.588	86.9684
59.5		43.4021	42.6405	25.8232	37.077	60.6127	46.805	19.2005	16.2435	19.1195	27.042	48.3824		61.6205	53.7633	64.3229		61.1644		79.7792	88.4013	126.005	93.5658
60		36.623	49.5397	26.035	30.9142	45.645	32.13	18.5459	23.6512	24.6218	24.4592	50.003		70.7239	62.6331	89.4944		72.025		81.3046	89.4408	142.286	112.952
60.5		41.5515	47.2536	55.5638	22.5478	37.3289	26.9173	23.805	14.5014	23.6811	27.6562	51.8533		39.2815	58.1331	112.298		78.0114		81.2162	80.7905	122.781	98.126
61		46.7291	59.6867	45.2758	20.5633	45.277	23.3469	25.2258	11.3224	15.9127	24.5694	38.4911		62.5409	77.9352	67.2938		45.7913		82.4845	95.1059	138.123	140.991
61.5		34.9503	61.0729	46.9249	38.1813	39.5524	21.5959	24.4212	9.30393	28.2856	26.5676	43.9539		42.0471	82.7641	56.9051		47.9991		78.8297	79.1973	141.402	99.1449
62		44.8085	54.7273	29.3535	41.4384	38.4578	14.626	27.023	5.02591	32.9352	26.2768	49.5335		61.5322	84.7713	85.4142		50.9618		86.2022	77.3839	121.322	87.4381
62.5		54.3113	64.4888	32.8745	33.0001	41.9589	20.8798	19.4535	13.2236	35.8795	21.396	54.6479		47.5679	61.8905	83.1331		44.9243		101.987	89.7549	143.738	103.977
63		44.7501	52.8927	31.3021	38.1415	60.7383	28.8143	23.2108	15.1866	27.8539	24.5431	55.5364		51.1735	82.28	63.1355		53.81		106.845	88.36	115.617	128.496
63.5		40.5174	55.9446	34.1451	43.8816	51.4896	22.5222	24.9281	12.6742	24.1084	24.887	47.9188		60.2945	102.778	65.0202		47.2458		105.274	88.7139	126.912	129.629
64		45.7851	45.9801	30.8012	36.6134	26.8127	17.2047	14.1944	4.0175	30.9851	30.5544	56.741		59.8516	56.3266	59.2067		57.644		104.215	93.6449	128.654	162.929
64.5		47.1156	35.8782	14.2815	40.0789	31.4586	19.6935	16.8634	1.39993	28.3914	24.0677	58.2383		66.62	66.8357	66.9517		42.6251		102.945	107.901	111.262	126.506
65		51.9393	34.26	32.7472	39.6554	39.4655	31.6674	17.7937	1.96156	24.8911	32.1731	65.2734		61.6439	46.2281	68.6953		48.2054		96.3067	88.0867		148.578
65.5		45.9479	70.496	26.4402	50.1318	33.7032	30.895	24.5729	7.09431	27.514	25.644	53.2666		65.5079	56.0578	62.4243		42.2989		77.1791	87.2159		106.304
66		51.3166	50.8278	21.9073	37.9287	30.9776	31.2473	34.5901	16.421	37.0442	23.212	53.7888		57.7627	60.4298	70.9635		50.7612		90.2395	90.2712		123.31
66.5		54.841	49.3404	14.9462	46.896	30.72	28.4841	25.9774	2.36497	34.7809	27.3965	51.6767		60.8133	78.2765	73.2945		58.2916		83.538	93.1922		104.568
67		51.8112	28.8392	32.7965	39.6216	28.3988	26.2704	33.2908	3.36117	26.2774	21.8749	46.9786		58.7179	88.3058	82.3655		59.5159		95.4088	86.6893		120.743
67.5		49.6459	44.7713	22.3152	39.1659	31.6707	24.3242	25.6228	10.226	28.4821	23.4298	45.5073		57.8997	61.0823	76.3545		62.1427		86.6939	86.9075		131.809
68		51.0149	48.2199	31.4291	37.4996	36.3087	26.228	25.4405	19.4453	35.3781	31.5647	46.9622		49.4657	62.7767	69.8594		62.5606		85.5582	75.4614		112.668
68.5		57.2654	44.2767	37.5928	38.2527	41.6902	22.1627	18.7742	-2.77404	37.2338	18.5132	45.8956		56.6654	67.3505	55.1369		73.5587		78.7122	69.6154		135.099
69		54.2799	44.0299	32.2232	37.1092	34.831	22.0975	37.5771	6.57898	34.1033	12.8522	47.7926		50.7783	59.5512	56.3202		65.5764		76.414	85.9156		163.713
69.5		55.3348	29.9328	43.1764	39.5074	38.1842	16.6852	41.044	13.6527	38.8432	23.07	51.0622		58.912	86.3812	60.768		76.6055		86.6872	88.5777		156.422
70		51.0541	36.9781	45.3372	42.2917	43.2228	31.8589	34.46	12.0498	38.7474	19.5872	48.3374		56.8216	59.4076	71.0044		69.8432		103.801	92.1284		151.163
70.5		56.7076	41.1662	50.7827	50.2227	39.9108	37.9545	49.0597	19.361	35.1701	22.4327	55.0719		46.2617	65.8263	83.8277		65.5714		99.924	97.1721		158.508
71		45.8021	33.5575	45.8893	45.9149	33.9524	33.6261	36.5987	20.411	30.7857	16.0911	47.595		66.11	73.3024	79.336		55.6428		92.5079	101.892		158.006
71.5		50.786	53.5128	43.8968	40.6381	39.6754	22.783	24.5724	1.40623	22.2954	20.8081	50.2859		60.2913	79.1967	82.6927		72.3541		86.1255	88.0569		164.801
72		49.1469	39.3053	38.5722	48.0213	56.3765	17.5795	29.7138	17.3932	23.623	15.9849	58.1556		58.0826	62.6608	84.838		79.9013		91.2118	107.53		159.698
72.5		52.1827	34.7933	19.4892	42.3021	61.4501	28.1673	37.3962	12.8122	35.0286	29.601	54.9754		51.7309	87.5632	81.8431		74.6876		89.1107	85.7093		138.482
73		51.6024	27.608	34.7515	35.209	48.2884	23.3942	25.8382	8.2585	26.0519	22.0583	60.2696		64.5546	95.4729	112.614		89.9153		87.4957	94.5831		154.762
73.5		58.3348	24.8016	35.299	40.6147	57.1658	27.3348	25.7611	8.39646	27.521	22.1424	45.9535		71.0782	90.3183	142.13		64.1834		74.3308	84.6611		121.314
74		55.1347	31.2906	52.1971	32.5653	56.0021	40.1061	26.2723	12.8393	32.1472	27.5382	46.368		67.2322	68.141	121.786		58.3853		74.7625	87.7878		122.098
74.5		48.5155	33.6844	39.2488	29.537	47.5951	43.4199	36.2939	13.2433	30.7701	19.8979	42.3726		52.5772	69.3373	106.237		49.409		88.9934	90.1175		112.052
75		52.982	33.8547	34.0211	42.4728	48.5686	53.6101	38.6826	10.9967	32.4961	22.3739	47.7642		51.3249	77.2245	89.2245		57.1404		78.4975	119.924		157.281
75.5		49.0473	23.3576	38.4529	44.9899	35.0895	43.4177	26.6368	-0.604446	34.3183	27.7481	52.058		70.5238	67.1954	77.903		53.618		80.4525	111		128.097
76		54.6734	29.8769	29.419	38.8768	48.4931	37.6777	36.2576	13.79	26.7254	19.4145	47.7231		59.6386	52.9688	78.5968		59.3652		71.9111	111.736		112.831
76.5		58.5647	20.9239	30.7847	33.1907	34.9595	46.9906	47.6216	18.7019	31.858	22.933	53.5783		70.5366	52.8449	82.798		51.1381		76.0475	104.476		114.056
77		57.1871	25.7683	39.38	31.4544	47.5032	34.1197	52.1635	10.9315	33.0852	19.9761	51.0895		53.5703	65.8795	71.5843		66.3659		79.7892	97.0363		104.24
77.5		54.9334	25.7392	47.704	37.376	34.8211	37.9394	48.5387	7.64397	28.1113	23.8667	53.4848		60.7104	76.6703	63.3478		53.3781		86.4621	122.093		138.265
78		48.252	33.3547	61.9028	32.9374	62.7225	18.6594	43.5266	7.39134	32.7663	20.5502	51.7008		60.4499	61.2455	86.2922		64.6854		89.5033	121.436		138.782
78.5		44.0487	36.5633	33.8021	51.4197	34.5539	23.329	27.6411	10.3526	33.0521	24.0756	52.1265		69.6399	70.6468	86.3797		61.5378		95.9763	114.575		156.754
79		37.6339	29.4465	46.6659	45.8764	32.9153	18.7132	40.8999	8.68839	33.8614	25.7161	58.1134		50.7598	60.9182	83.054		64.6132		103.26	99.8333		159.051
79.5		46.186	20.8804	47.1439	36.6697	40.8564	30.3166	34.312	3.73029	33.7935	20.1279	49.0566		55.0833	57.2165	91.4233		70.2094		85.2997	93.1896		147.496
80		49.0125	42.7875	31.5702	31.6962	39.8268	37.0755	19.6749	12.4604	31.9704	27.5125	43.6467		54.0442	72.3603	80.7412		71.2507		85.9059	104.463		181.94
80.5		42.9889	41.1387	31.0724	33.5195	37.2486	37.9114	14.3284	18.1621	43.7798	24.1626	55.0692		47.1826	65.1708	96.5036		70.4731		64.4527	103.833		135.999
81		44.5575	42.4811	38.2276	38.8366	36.7104	32.2008	16.1423	18.0137	50.6127	25.0756	48.1624		46.6917	56.6145	90.1459		65.6311		67.8224	115.547		133.263
81.5		44.4362	50.0447	29.5206	58.6716	38.6904	35.6993	21.2656	13.3537	38.2142	22.8031	51.4688		43.5385	59.2072	106.034		61.9543		77.8152	130.174		114.864
82		50.3854	56.9263	29.279	44.4449	42.5521	38.6289	33.4441	24.9859	32.5197	33.9489	52.3329		34.1397	74.1607	101.067		63.088		82.6508	132.303		87.8026
82.5		51.2334	34.718	48.414	41.5668	34.7035	39.5175	21.3867	17.9875	40.5418	18.3895	52.7956		52.5963	53.0737	70.8168		56.038		71.3112	129.749		85.5585
83		57.1719	41.3161	45.3207	42.8596	36.7013	50.5191	22.9836	14.2707	37.5798	26.336	63.3925		67.8515	47.5326	90.5304		63.1647		87.9847	103.175		98.2768
83.5		50.6136	68.6446	27.1163	58.3428	33.6185	42.3158	25.6991	22.8235	39.3326	22.8253	46.286		50.2741	55.2474	72.4633		47.5953		97.6279	109.724		101.713
84		41.6759	61.8894	28.1799	51.2881	37.696	41.9237	26.4981	20.0982	24.6999	20.9995	55.6686		69.9609	64.7639	98.3123		72.4207		82.3515	99.2784		102.867
84.5		43.0495	58.171	43.3583	47.2933	30.9228	42.3662	28.4508	14.0962	39.8238	23.9652	43.4503		70.5953	87.6311	99.9182		69.223		86.2334	105.691		93.5031
85		58.037	46.0627	42.4192	46.8509	42.1464	57.744	30.5934	24.8978	36.1249	24.4491	45.0652		47.5995	76.274	94.2917		68.4475		82.3583	116.676		108.082
85.5		49.2771	53.5913	59.8957	36.4177	23.4715	53.383	34.8425	15.1374	42.3058	22.1893	54.4383		35.8048	57.6734	81.7316		71.584		78.0019	101.94		106.714
86		65.7422	37.351	36.2982	31.082	23.6151	46.2796	34.3802	18.9083	42.4751	21.6338	43.5009		37.1439	46.959	76.4722		69.2347		85.0984	115.447		118.093
86.5		50.458	44.7156	53.0238	32.0071	27.2254	45.6828	43.3249	13.2432	46.7047	21.7281	38.7187		40.3365	47.7842	110.492		79.1356		84.8576	123.288		122.94
87		48.9425	50.2087	49.4299	46.8654	32.9306	44.8135	35.9261	23.0968	32.327	19.5462	40.2287		65.5146	73.8092	88.6745		69.0089		96.6728	110.2		101.228
87.5		53.0233	36.2995	41.3462	45.6532	45.8498	43.9072	40.7963	9.83502	40.343	19.9302	34.5959		57.6779	70.5269	100.31		83.2978		98.922	90.4209		114.452
88		50.5612	53.5716	48.6213	36.071	33.1263	41.8353	20.8008	13.5059	33.0088	19.2331	41.8202		46.5505	76.7142	62.0468		67.5431		88.8233	107.058		109.534
88.5		53.0179	53.6833	62.6077	55.3663	25.157	46.9588	19.8009	11.2608	33.7645	19.3514	51.6833		44.8855	73.513	103.359		61.202		87.863	94.898		105.604
89		46.6286	27.4888	47.9018	42.7048	35.4895	45.3036	19.6576	17.256	44.5331	22.1481	52.161		47.8842	60.6608	92.1462		75.4519		79.1019	66.798		103.76
89.5		44.4514	34.5374	42.0045	43.4101	29.0372	36.2209	17.0831	16.1664	35.3082	22.2889	41.1071		50.8579	57.5967	97.3438		64.4397		97.1047	89.6434		117.748
90		47.3545	38.6503	45.6473	44.8825	44.2767	34.3435	39.1417	11.4036	50.0056	18.2926	50.0858		56.5127	54.5143	118.469		67.1316		87.0233	99.8377		91.7329
90.5		38.5249	20.2832	62.6278	27.8077	30.7027	32.5573	15.0262	7.92602	51.6238	17.9535	45.0264		51.9376	41.0796	137.592		58.5664		96.4534	91.8238		94.6783
91		32.7882	45.1887	44.4215	52.12	37.3634	42.681	23.4102	6.11054	41.8823	25.494	35.4077		54.2826	43.8772	117.773		73.5091		89.7132	88.8234		147.473
91.5		42.5937	24.6278	45.4687	46.3078	25.9096	32.043	17.1248	23.3582	52.5911	20.9338	55.5666		53.5722	44.602	106.418		61.9739		92.3046	75.7894		128.137
92		38.8067	39.1505	54.6579	41.4656	33.5096	38.1196	22.2573	13.4739	34.2368	24.9397	59.8385		56.5626	55.9743	104.129		60.7828		86.238	71.3397		102.424
92.5		35.7165	34.2491	35.7038	42.8623	18.7411	47.7043	20.9495	11.3086	28.8374	26.3405	41.9644		54.1714	53.3916	107.493		58.868		93.8726	67.1336		153.081
93		29.2637	42.9102	41.0816	25.0538	23.4334	45.9547	26.5178	10.4159	29.784	25.3245	45.9607		49.9047	61.3488	95.0535		59.9496		93.7806	73.9101		108.206
93.5		37.9398	41.2638	45.2895	45.3997	25.6912	54.4936	14.2727	20.4785	24.1241	30.2474	61.0797		62.4562	89.5095	84.9386		61.3133		78.2475	79.582		120.718
94		41.4107	32.8028	58.4233	44.5692	33.5555	39.5287	29.068	16.7865	20.3199	23.8394	54.3404
94.5		40.4839	26.4154	41.379	48.3322	28.5739	27.6307	28.216	13.0644	26.8587	27.6546	47.2958
95		43.6104	22.1193	43.9428	37.8223	37.3867	45.2361	19.3914	16.595	37.8647	27.5913	54.704
95.5		34.8405	32.3066	49.1929	34.7415	31.3577	19.8586	22.486	13.9398	24.7876	25.7854	47.3953
96		43.041	35.7181	36.6293	49.8112	26.7134	25.2394	16.8472	12.5333	29.2174	28.5918	37.0426
96.5		45.4133	33.5537	32.4529	37.4713	23.3888	35.722	23.9188	9.60245	21.8581	28.1441	39.7957
97		45.2724	29.5938	53.581	41.9061	15.8518	38.8724	35.3884	15.566	22.7669	25.3271	42.0021
97.5		49.6113	34.1648	52.5637	53.8524	31.0891	31.1131	28.6774	23.7535	24.7986	31.5655	43.6043
98		45.3298	33.9439	34.7391	39.5145	21.0804	31.4643	24.0955	15.3847	34.0914	31.8597	44.6212
98.5		43.3181	21.8811	53.2637	51.6879	29.8931	36.8214	26.05	21.5599	24.8736	33.747	49.6984
99		54.3311	22.6506	45.999	43.8348	18.4042	27.1196	26.053	17.7588	21.8728	23.9473	44.1062
99.5		56.9504	20.6401	71.3569	50.5395	27.3732	21.6786	21.8712	10.4749	25.707	27.7676	48.8922
100		60.4533	31.7146	25.8882	53.3051	21.3185	23.5557	33.2733	17.0093	27.4258	22.0641	42.9997
100.5		44.0068	31.0702	47.2943	53.6114	23.8172	19.6975	33.5071	6.57892	29.5388	22.3283	48.1464
101		36.647	19.64	56.531	51.4336	26.0839	37.4962	27.4796	11.653	31.4983	25.1557	40.4191
101.5		42.7638	18.6372	32.4476	47.261	30.5124	33.37	27.8492	23.3226	29.5762	27.5579	46.6356
102		40.9907	32.9616	37.4364	39.2621	30.5579	36.6774	26.4822	10.0966	27.5352	26.0855	49.9575
102.5		34.9203	24.1312	50.5315	50.8614	29.3483	30.8986	23.9391	5.37669	31.5422	20.9268	51.3656
103		51.393	27.9221	69.2204	50.9417	32.609	18.07	38.5121	13.3073	28.7477	22.8493	55.9906
103.5		43.77	41.6911	40.4349	49.3817	38.3958	29.1156	40.6625	5.95504	22.8746	25.0199	54.8598
104		45.8193	40.8348	46.8966	45.838	30.9198	44.0605	19.9957	11.7643	21.3381	24.6452	47.1131
104.5		46.3959	50.009	42.2506	44.6575	26.4689	41.6706	16.069	3.97107	27.9229	23.6318	41.6027
105		42.3074	51.1708	27.1354	57.6131	40.2021	40.0557	24.0412	13.1535	30.4365	21.7895	48.2174
105.5		44.6988	55.1275	30.3686	66.4944	33.1095	38.4726	24.0458	-0.676799	32.9972	19.7384	46.4781
106		47.8373	63.7088	52.5756	57.6492	36.7714	48.6511	37.3454	5.47696	27.0943	25.9475	42.9416
106.5		41.3661	35.9875	58.345	55.9624	22.6556	44.6886	19.0081	11.1494	33.2285	23.5129	37.2882
107		28.2126	48.1041	57.4115	59.5834	31.7816	55.096	19.1046	10.1124	32.7654	25.9398	38.7259
107.5		37.9747	43.4075	46.669	52.1671	34.1708	44.9797	28.1619	16.5075	36.0422	25.6327	41.7494
108		42.7176	58.9803	42.9655	48.5162	35.1447	37.6742	27.8819	11.5194	41.2117	17.4373	52.9301
108.5		29.7957	50.8863	27.3787	56.3751	49.0761	50.5335	20.2278	16.332	28.7065	24.6238	44.9925
109		48.1772	36.5133	45.7135	42.391	36.7674	41.5236	24.1568	16.0541	41.2538	28.0164	40.9828
109.5		34.871	50.0962	39.2512	40.5724	30.3391	45.0597	9.66939	5.9139	32.4887	28.9006	43.9929
110		41.6459	55.7943	32.1074	62.8519	28.8873	47.1439	23.314	12.3377	22.3572	27.7135	47.8184
110.5
111
111.5
112
112.5
113
113.5
114
114.5
115
115.5
116
116.5
117
117.5
118
118.5
119
119.5
120
120.5
121
121.5
122
122.5
123
123.5
124
124.5
125
125.5
126
126.5
127
127.5
128
128.5
129
129.5
130
130.5
131
131.5
132
132.5
133
133.5
134
134.5
135
135.5
136
136.5
137
137.5
138
138.5
139
139.5
140
140.5
141
141.5
142
142.5
143
143.5
144
144.5
145
145.5
146
146.5
147
147.5
148
148.5
149
149.5
150
150.5

## Sheet: Figure 5G
immobile fraction (%)	UNC-33M::GFP	UNC-33MΔC
	53.0334	44.3091
	59.3852	34.6429
	60.8327	13.8895
	57.1234	38.1807
	64.423	14.4755
	65.9047	5.84636
	74.903	-30.2943
	87.4442	-21.1294
	68.0449
	75.6081
	50.4967

## Sheet: Figure 5H
	UNC-33L::GFP																												UNC-33LΔC::GFP
time(s)	w1	w2	w3	w4	w5	w6	w7	w8	w9	w10	w11	w12	w13	w14	w15	w16													w1	w2	w3	w4	w5	w6	w7	w8	w9	w10	w11
0	0	0	0	0	0	0	0	0	0	0	0	0	0	0	0	0													0	0	0	0	0	0	0	0	0	0	0
0.5	10.0209	7.55626	-0.59083	2.13439	3.00397	-5.34515	8.62543	3.07515	-0.39719	2.78271	-1.71533	6.1483	2.84027	0.178584	3.12867	1.52523													8.91647	4.40535	-5.90661	-0.44607	11.5664	13.2782	28.4607	4.98173	6.29365	5.44588	4.42379
1	5.47141	4.40335	1.64402	2.69963	-0.359486	-10.6903	17.2509	6.15029	-0.79437	5.56542	-3.43066	12.2966	5.68054	0.357167	6.25733	3.05047													8.24747	-1.03819	-7.96289	-0.03607	12.2913	12.8344	32.4247	0.772619	-2.0394	3.53085	9.70168
1.5	8.73766	9.00709	3.19819	4.45005	3.06584	-7.80786	16.0333	7.01675	2.18768	6.52531	-0.69529	10.9303	3.55463	0.3741	6.17885	4.31508													4.06194	6.70266	4.04526	10.7773	13.3318	13.8017	16.3358	-1.99447	0.887236	2.33148	7.59472
2	6.57796	12.3132	1.49611	4.58206	5.90616	-4.92542	14.8156	7.88321	5.16973	7.48519	2.04008	9.56401	1.42873	0.391033	6.10037	5.5797													8.61642	3.59076	-1.12944	15.9906	14.7343	6.75923	45.8887	0.951919	2.06818	2.46179	7.47149
2.5	11.6749	12.091	2.35704	5.22852	8.57801	-4.05282	20.5151	11.7751	5.42641	9.53586	4.00665	9.20153	4.80288	-1.61396	5.32423	5.78297													11.2012	-1.11602	1.13977	8.47686	17.5291	18.9317	23.9955	4.46662	-1.71013	3.0974	7.65791
3	12.3253	13.3156	3.53433	10.4994	7.13611	-3.18021	26.2146	15.6669	5.68308	11.5865	5.97323	8.83904	8.17702	-3.61895	4.5481	5.98624													8.84908	7.74113	0.829575	9.16309	18.9146	19.4059	28.6885	7.04409	-4.25794	6.31471	11.6414
3.5	10.677	14.7939	5.86079	6.01444	6.37643	-1.62596	17.6799	13.5226	2.98513	12.366	5.53662	11.1487	11.0099	1.34627	6.85219	8.42454													9.38263	3.37267	16.1189	-1.15208	17.9395	13.7794	34.1142	7.35584	-0.80735	5.98698	15.7187
4	11.2404	12.9031	7.02497	8.85685	13.1072	-0.07171	9.1453	11.3783	0.287184	13.1456	5.10002	13.4583	13.8429	6.31148	9.15627	10.8628													7.51787	9.85218	2.17732	2.74286	15.7869	9.21688	32.6801	9.41639	0.167126	6.02218	12.2132
4.5	11.1955	6.62864	9.53024	6.58071	14.1197	3.80287	13.9349	11.3904	3.82045	10.8258	4.32911	15.5738	10.9225	1.33502	9.09867	8.92966													9.81065	7.12057	6.72647	2.139	20.3801	12.197	25.7647	3.25281	6.92937	4.89904	15.1734
5	17.4339	10.7934	2.62818	9.42239	13.0689	7.67744	18.7245	11.4026	7.35372	8.506	3.55819	17.6893	8.00209	-3.64144	9.04107	6.99648													9.87894	13.6947	12.8757	10.022	11.6449	29.9342	28.0286	8.49121	14.199	4.98681	14.4675
5.5	13.8133	11.7538	8.80423	8.68704	16.4626	-2.20213	26.5965	14.2961	5.10346	9.39002	3.50267	16.4861	8.78288	2.14245	7.60156	9.62203													15.87	5.96183	21.7637	8.89293	14.509	24.2628	34.1875	8.57685	7.62688	5.22931	24.8499
6	17.1667	11.6694	7.05546	7.65478	16.1598	-12.0817	34.4684	17.1896	2.85319	10.274	3.44715	15.283	9.56368	7.92635	6.16206	12.2476													10.3806	12.9328	10.8026	29.5799	15.5171	25.0295	42.3068	6.27769	4.29955	6.64132	20.4517
6.5	12.3206	11.6043	6.64558	12.8029	15.4555	-2.72412	27.8936	17.6943	0.287183	12.1347	4.25263	16.3626	11.2051	6.77416	8.91427	10.3617													12.7198	2.55731	8.17849	11.3519	18.2736	12.25	62.151	9.31979	5.66056	7.94705	15.9703
7	13.865	11.0438	3.93749	9.46907	15.6812	6.63345	21.3188	18.199	-2.27883	13.9954	5.05812	17.4421	12.8464	5.62197	11.6665	8.47587													14.2421	6.47088	14.4853	9.78758	17.7031	13.4021	50.6322	4.34867	3.52437	8.16586	19.0578
7.5	11.5374	14.1919	5.96985	11.8502	16.617	8.56621	18.8165	15.9622	0.362622	16.0595	6.27601	17.9256	11.1758	4.80967	12.6382	9.81285													7.95416	8.64553	26.0863	12.823	17.2739	11.5454	23.8834	2.65858	1.45991	6.11534	12.7756
8	11.8471	14.0935	4.31621	12.2477	10.991	10.499	16.3143	13.7254	3.00407	18.1236	7.49391	18.409	9.50516	3.99737	13.61	11.1498													8.46557	5.49248	11.023	5.35763	12.8173	7.22318	34.7395	10.7689	0.53713	7.97408	9.98832
8.5	12.4197	10.5259	7.46061	10.1758	13.5375	11.7143	11.3674	11.8661	0.457542	16.2285	9.37034	18.2751	11.2351	4.801	13.7227	9.94926													10.4668	8.94891	18.0457	4.45663	16.4648	10.5507	55.9024	5.84098	1.33536	8.43002	18.2482
9	11.1262	10.4627	2.3944	6.56804	13.0386	12.9296	6.4204	10.0068	-2.08899	14.3334	11.2468	18.1412	12.9651	5.60464	13.8353	8.7487													9.06577	3.94027	10.4905	6.12406	12.7045	12.3732	41.5977	12.8819	-4.85955	8.90569	16.8557
9.5	11.9871	15.6849	4.28561	8.46826	13.8188	12.7599	2.45101	11.2522	2.10995	14.9206	12.4009	19.3134	11.2347	3.44308	11.6877	9.01553													15.108	13.6808	10.8798	9.43414	18.368	7.40623	49.1163	7.98936	0.05678	10.0624	22.0243
10	11.8744	19.328	1.21437	11.1194	8.88468	12.5903	-1.51838	12.4977	6.30888	15.5077	13.5549	20.4855	9.5043	1.28152	9.5401	9.28237													18.041	4.84215	8.08429	12.0819	10.8983	2.34909	46.3631	10.9383	5.7127	9.81872	17.663
10.5	11.1622	15.1925	3.8714	11.2099	12.4347	16.0143	7.55816	11.765	1.7345	17.523	8.24446	20.7887	9.06616	0.105826	9.20411	10.0427													14.8865	6.84444	17.6427	6.37836	11.9041	10.0947	15.6819	9.25485	10.4163	11.1273	17.3874
11	9.36573	13.987	5.25118	10.2698	15.0538	19.4382	16.6347	11.0323	-2.83988	19.5382	2.93399	21.0919	8.62802	-1.06987	8.86812	10.803													17.0013	5.9391	13.9471	8.97926	10.8015	10.3107	29.0518	5.70969	4.11351	5.64965	13.5986
11.5	16.4252	13.0163	7.63141	10.6036	19.1696	15.7453	9.25338	15.7092	1.20115	19.5105	10.7618	20.0627	10.0219	-0.05546	11.3945	11.7435													13.7972	12.4558	9.01955	18.4597	10.7057	18.0634	17.0391	4.73071	6.16742	5.01065	23.9652
12	17.4428	14.0066	3.74167	10.533	19.3338	12.0525	1.87206	20.3861	5.24217	19.4828	18.5896	19.0334	11.4158	0.958952	13.9209	12.684													15.6356	9.75243	11.4056	9.07033	12.1867	20.6385	37.939	4.17018	5.60578	6.68585	24.2502
12.5	13.5502	15.0757	4.81047	11.6249	20.5071	13.2503	10.1815	16.823	8.27311	17.3587	11.4377	17.6819	12.1019	3.5599	15.3838	11.9191													14.2034	16.9472	11.6183	0.992386	17.6112	10.4682	61.6176	3.05123	0.759475	8.49159	19.0699
13	18.331	17.3784	4.67722	9.26397	11.7141	14.4482	18.4909	13.26	11.304	15.2345	4.28581	16.3304	12.788	6.16084	16.8467	11.1542													18.8959	16.1627	11.5424	14.8231	10.8321	40.0975	47.4397	4.63631	4.45415	7.80904	19.8861
13.5	19.4937	12.8669	2.70108	12.2519	13.9852	9.78307	12.5135	11.2208	7.78829	16.7659	8.15869	16.74	12.7263	4.79495	12.6435	12.6183													14.9621	10.7568	15.2233	12.1027	10.7209	35.5735	31.6163	2.14282	6.94584	8.96026	31.9501
14	9.13031	17.6152	2.39539	11.7454	15.6965	5.11796	6.53612	9.1817	4.27254	18.2974	12.0316	17.1496	12.6645	3.42906	8.44034	14.0823													19.1183	6.16773	12.7081	9.82664	13.4696	18.8353	60.1481	2.37661	5.05363	7.39589	25.1161
14.5	13.5199	15.1426	3.21825	10.1002	16.0432	7.71454	11.4701	11.8352	7.32012	17.4217	5.92271	17.1305	13.6043	4.95409	10.6416	12.0377													13.9831	4.81471	13.5092	15.5577	7.3983	16.7055	30.0335	5.5088	5.79692	6.8165	17.9768
15	13.2572	15.9862	4.22752	11.3939	11.8972	10.3111	16.404	14.4887	10.3677	16.546	-0.18614	17.1115	14.5442	6.47912	12.8429	9.99317													15.6871	5.91798	20.2221	13.3974	16.68	26.4754	58.4003	9.28645	7.40126	5.16553	20.4392
15.5	10.5038	11.8697	3.94203	13.3106	17.794	14.1634	6.41418	12.2292	2.67475	15.5284	4.73822	18.6864	10.0009	7.90719	10.829	8.41158													13.4563	7.60663	18.807	17.5093	11.3511	23.1637	22.2718	13.3588	4.49095	6.08865	22.1142
16	16.6197	13.3963	6.92906	12.78	16.298	18.0157	-3.57566	9.96968	-5.0182	14.5107	9.66258	20.2613	5.45758	9.33526	8.8151	6.82999													9.35466	5.47851	8.99147	12.2819	14.7343	20.2029	37.4568	6.50305	14.4754	6.16498	16.5481
16.5	12.1569	14.0953	2.17966	11.541	19.7464	11.3185	4.61435	8.44377	0.645982	15.7578	8.68023	17.7532	8.13987	5.09213	8.65733	8.15781													11.5417	6.67228	23.4876	2.50075	12.0665	20.2679	49.5751	5.55024	5.17701	7.84162	20.2818
17	11.6458	16.2451	2.63938	13.8002	17.771	4.62135	12.8044	6.91786	6.31016	17.005	7.69788	15.2452	10.8222	0.849004	8.49956	9.48563													7.63831	12.9896	13.2714	11.6678	19.7212	23.5465	43.2742	7.51462	8.14753	6.68074	14.2853
17.5	9.01581	16.3752	3.11561	11.5502	19.0404	3.23379	14.6306	11.1977	4.41817	15.6881	8.54632	17.6542	13.317	1.06572	7.47037	8.41197													13.5655	17.1729	19.5815	19.0989	12.0299	34.3296	50.5119	3.19066	8.2625	9.00105	26.7342
18	12.893	13.5505	0.424858	12.3452	23.3443	1.84624	16.4569	15.4776	2.52618	14.3712	9.39476	20.0632	15.8118	1.28243	6.44118	7.33832													15.3377	9.64159	18.7893	27.1309	14.3776	22.8036	22.8105	4.75425	8.50292	8.26869	20.7306
18.5	12.9164	15.5435	3.83579	6.30855	20.0228	5.49569	9.77196	12.5855	5.3767	16.0767	11.0573	17.9903	12.2118	0.694295	7.94296	9.40971													13.237	9.94723	13.8988	15.0168	10.0724	23.8492	47.8496	10.2258	7.97283	6.47567	26.8975
19	10.7282	12.8575	7.99148	15.4751	14.8881	9.14515	3.087	9.6934	8.22721	17.7821	12.7199	15.9175	8.61185	0.106163	9.44473	11.4811													18.4127	11.5162	20.9376	5.27392	16.6613	37.4818	49.8259	5.57337	3.4351	9.63565	17.3768
19.5	13.9545	12.663	7.45378	17.4018	18.8111	8.8087	3.82496	9.94337	6.68551	17.2485	10.7096	18.4488	14.05	-0.26195	6.64949	13.0616													12.6532	9.55604	18.509	12.4622	15.4844	27.6687	46.98	6.46071	7.768	7.36282	30.0964
20	16.8549	14.3575	7.75282	15.2313	19.0138	8.47225	4.56292	10.1933	5.14381	16.7148	8.69922	20.98	19.4882	-0.63007	3.85424	14.6421													18.8113	2.48583	16.4879	8.30122	17.1938	27.9127	41.9347	4.79371	8.01801	6.6109	24.7777
20.5	10.029	20.5471	7.0896	12.6049	21.7941	4.93761	-4.48669	12.1456	4.83853	17.9737	10.6787	20.1328	18.6052	0.803536	7.51399	9.09822													15.3298	12.8414	22.096	9.75805	21.5683	20.0599	39.4017	1.11635	1.27997	7.0448	28.031
21	13.5071	16.6118	5.88543	15.3581	18.7226	1.40297	-13.5363	14.0978	4.53326	19.2327	12.6583	19.2856	17.7222	2.23714	11.1737	3.55432													12.4712	10.6414	12.1844	8.68214	18.6881	19.9001	44.1321	7.55278	11.1037	8.3558	27.163
21.5	11.8407	21.4581	4.89528	10.228	18.5038	7.49425	-2.60688	12.4784	3.6035	20.2971	13.7925	20.7237	18.9143	3.32719	12.0213	6.51394													24.7262	13.0346	19.5374	9.91794	18.5279	25.0962	50.8001	7.47087	12.5478	10.4007	28.6234
22	14.863	17.9635	9.59408	11.6285	18.8737	13.5855	8.32255	10.8589	2.67375	21.3615	14.9267	22.1619	20.1063	4.41725	12.8688	9.47355													17.4288	9.96975	9.74445	11.2793	14.4523	35.9231	57.6946	7.80878	17.8954	6.00008	25.7797
22.5	14.2177	17.3383	7.90421	10.6128	17.1038	12.9846	6.19843	12.8207	0.21373	18.5411	16.7662	19.9385	18.8583	4.20141	13.7481	9.15111													19.3417	9.51644	8.65358	2.94633	17.9979	15.7232	53.4836	2.23293	14.3925	4.73064	28.5405
23	12.2374	17.2596	12.7256	11.0636	17.36	12.3836	4.07432	14.7825	-2.24629	15.7207	18.6058	17.7151	17.6103	3.98557	14.6274	8.82867													15.8541	4.32079	20.0612	2.57992	22.3607	32.7642	29.1828	5.87621	15.1064	7.62887	21.1514
23.5	10.4971	17.3134	14.8626	10.1683	21.8257	21.1222	7.19613	15.6134	6.52721	16.4577	19.1389	19.148	17.1066	4.90777	14.3818	10.2846													10.1388	13.3547	20.1481	11.2025	20.5392	22.3727	47.15	8.89292	11.9868	6.68054	24.6497
24	12.2639	17.308	11.674	14.0038	18.4558	29.8607	10.3179	16.4443	15.3007	17.1947	19.672	20.5808	16.6028	5.82998	14.1361	11.7406													11.6943	1.61792	17.9915	2.81939	17.4523	16.3055	58.8307	6.24566	16.0068	6.70077	33.458
24.5	9.74238	17.0017	12.785	14.7441	19.785	22.0566	14.0146	15.1803	8.09331	15.9111	15.3182	22.1485	19.0912	6.9898	12.2464	13.5084													9.51458	6.28476	10.8548	14.5895	21.4479	15.9408	44.3961	0.106512	8.12081	3.98531	26.3304
25	9.8464	16.5765	14.6962	14.4995	17.8489	14.2525	17.7114	13.9164	0.885899	14.6275	10.9644	23.7162	21.5796	8.14963	10.3567	15.2763													10.8107	9.72811	21.4625	16.5259	23.1334	23.7994	53.1937	1.88882	9.18308	4.59779	27.3503
25.5	10.0023	19.7889	18.1878	11.8165	16.3392	10.5684	10.3278	15.8087	1.34983	15.3917	11.9201	23.8619	21.0873	3.38653	11.7044	13.5801													19.4975	10.8352	12.275	10.0368	17.3663	32.4207	37.3601	1.92805	3.97837	6.67192	34.3358
26	7.97945	22.8707	12.5411	11.1409	18.7876	6.88417	2.94422	17.701	1.81377	16.1559	12.8758	24.0076	20.595	-1.37656	13.052	11.884													13.8075	9.44318	12.124	11.5263	20.944	22.2525	50.1393	3.18096	8.52338	6.31794	30.9317
26.5	10.0004	24.8135	13.2439	14.1049	17.8804	6.9591	8.87228	17.1089	5.5118	18.4623	13.2504	25.4707	16.9741	4.3592	11.3345	11.6192													16.9207	7.82363	0.298138	19.6963	18.3485	40.9312	67.9682	4.27135	12.6578	6.19321	28.5658
27	14.3093	20.9398	7.90785	12.1699	16.6574	7.03404	14.8003	16.5168	9.20983	20.7686	13.625	26.9338	13.3533	10.095	9.61691	11.3545													16.2664	7.97145	17.9866	9.54485	16.7415	45.4755	49.0538	8.8543	7.79243	5.95508	32.8103
27.5	14.2913	18.8732	11.0085	16.8097	22.0174	5.45515	4.23907	15.2047	11.2976	20.7388	12.5642	25.7286	15.2359	7.75619	9.07221	13.1114													22.2703	1.87168	16.8247	10.4874	17.8036	23.0343	47.3437	4.91625	10.0867	8.75656	40.9451
28	12.5714	17.6501	14.0384	12.1555	22.3595	3.87626	-6.32221	13.8927	13.3854	20.709	11.5033	24.5234	17.1184	5.41741	8.52751	14.8684													19.5683	7.30284	19.925	12.177	19.9946	28.8359	45.6165	2.79428	4.29678	7.51651	28.5163
28.5	12.345	15.7841	16.7457	13.9205	27.1285	2.65492	3.11683	15.0675	9.16174	20.0224	9.9004	21.5878	17.4643	2.29141	10.8008	13.2535													13.5924	4.10079	18.662	14.0437	16.1854	20.1365	55.9024	8.9746	5.88863	7.88644	34.6999
29	16.9766	14.5937	13.9489	15.9647	19.1188	1.43359	12.5559	16.2423	4.93808	19.3359	8.29745	18.6522	17.8101	-0.83459	13.0741	11.6387													15.6372	6.06227	19.473	13.432	11.7665	41.5758	56.9506	7.6808	7.41471	5.31473	27.081
29.5	15.8327	15.7892	17.3138	14.5751	22.9159	-2.06436	16.2257	16.8476	6.73583	18.6911	9.343	18.4998	18.6338	2.19962	11.9844	11.6486													10.8603	7.34291	14.3955	5.61909	8.17036	19.18	46.7208	5.56424	5.74675	7.45515	16.5194
30	15.6007	20.3251	13.5212	13.6341	19.1025	-5.5623	19.8955	17.4529	8.53359	18.0463	10.3885	18.3473	19.4574	5.23383	10.8947	11.6585													21.4741	3.31036	18.6052	11.2864	14.1907	24.034	43.8183	3.72997	6.62501	4.93553	28.1446
30.5	18.3428	17.4516	10.5267	17.1763	15.9198	4.94602	18.3471	15.9451	6.81537	20.1176	10.101	21.3726	19.7456	7.65006	10.0842	13.3942													17.8833	1.65137	17.2514	12.8687	16.8874	22.5979	60.3598	8.22698	3.06389	11.1335	17.8034
31	12.6064	14.307	10.7092	18.9643	22.7016	15.4543	16.7987	14.4373	5.09714	22.1887	9.81348	24.398	20.0338	10.0663	9.27382	15.1299													14.0349	15.875	23.1747	3.35607	14.8719	36.941	35.2623	11.9336	5.77754	8.49058	24.3008
31.5	18.9759	21.9778	15.1329	15.8059	22.9538	10.0942	14.5965	13.9486	7.85528	19.1195	8.34832	21.6076	16.5265	6.6502	11.1632	14.3072													13.9089	7.57226	15.1344	11.788	17.206	41.4084	72.5347	3.00431	4.94049	9.10459	29.4361
32	12.1263	17.8231	13.6615	16.718	20.0891	4.73398	12.3944	13.4599	10.6134	16.0502	6.88315	18.8172	13.0193	3.23409	13.0527	13.4846													15.9076	16.2804	22.4221	20.7852	10.3463	30.3038	59.2735	10.5563	5.85398	6.45383	29.1684
32.5	13.2525	18.4065	13.9903	15.0459	22.7149	1.0205	3.38979	14.8785	4.87894	18.493	9.64836	20.3914	14.176	1.27202	12.3175	13.0259													15.936	16.276	14.5746	3.26918	20.2494	40.2709	36.7796	11.4765	9.1481	9.14154	25.9528
33	15.6096	15.4293	13.4628	10.7974	21.3878	-2.69298	-5.61479	16.2972	-0.85555	20.9358	12.4136	21.9656	15.3327	-0.69006	11.5824	12.5671													17.5878	11.9574	13.4573	13.8001	16.4686	39.5676	60.8743	8.20244	9.61483	8.26737	31.6532
33.5	16.9286	17.1651	10.5098	12.9616	20.9524	1.90993	-0.73692	15.2026	5.11665	19.1701	10.574	19.7309	17.5018	1.23936	10.4807	12.1433													17.3489	4.06242	10.9911	4.86881	19.5436	49.5155	58.7734	11.0818	11.3684	7.47	26.5571
34	13.9554	16.16	11.1984	15.6567	20.6106	6.51284	4.14095	14.1081	11.0888	17.4045	8.73447	17.4962	19.6709	3.16877	9.379	11.7196													18.5703	4.02163	18.4124	7.82383	20.322	50.6037	47.829	11.342	11.1744	5.78688	35.8162
34.5	18.4563	17.6164	11.5676	13.8186	21.9145	6.95084	2.6635	15.1735	6.83139	13.9802	14.269	18.518	15.2551	6.07369	10.2531	13.9343													16.6028	13.8247	26.0112	9.64287	22.2363	29.0729	42.5153	6.40037	5.54537	4.78906	22.793
35	17.4051	13.8406	12.1796	10.6248	20.6163	7.38885	1.18605	16.2389	2.57395	10.5558	19.8035	19.5398	10.8394	8.97862	11.1272	16.1491													18.0117	11.5325	1.58289	16.0039	18.6239	24.0719	44.8675	5.02998	11.49	4.56603	25.7437
35.5	15.7144	17.0646	12.0128	12.114	21.2884	3.63052	1.12811	18.5794	3.92848	13.0054	19.4463	22.568	10.0462	8.87038	5.89895	12.1855													15.9093	8.687	22.5845	11.7253	16.6403	36.7326	46.4572	3.20347	3.19569	8.06621	26.6889
36	17.878	11.4318	11.0015	12.5831	21.7191	-0.12781	1.07017	20.92	5.28301	15.455	19.0891	25.5962	9.253	8.76215	0.670704	8.22199													23.1828	16.3007	19.6577	13.0673	16.7901	42.208	26.6791	6.66903	3.1692	5.59429	19.1397
36.5	15.4835	14.4819	11.3341	15.0963	14.8347	0.566722	11.6516	19.457	4.28891	15.6037	18.356	24.2732	11.5438	10.8856	6.29282	10.0699													16.1578	16.6732	11.3148	7.59946	13.4739	30.3853	46.912	6.73446	6.48974	11.1702	24.0335
37	12.9146	17.9289	7.66733	16.7493	16.0622	1.26125	22.2331	17.9939	3.29481	15.7524	17.6229	22.9502	13.8345	13.009	11.9149	11.9177													22.5345	7.60785	15.215	3.99516	16.6655	36.821	60.1277	4.48212	9.66483	6.13567	23.4308
37.5	11.0324	12.7078	11.9709	14.4469	21.512	6.63161	23.0197	14.838	3.89418	14.9401	11.7487	21.9147	16.93	8.36669	8.49241	10.4892													18.0423	8.66846	16.6908	12.1015	17.3094	22.9367	60.0942	7.23252	8.41128	7.33213	26.9477
38	10.3641	10.9733	11.3615	17.0656	20.8077	12.002	23.8064	11.682	4.49354	14.1279	5.87455	20.8791	20.0256	3.72439	5.06989	9.06061													23.0174	14.378	12.6672	7.02761	15.8603	36.7786	58.8058	7.76139	10.1591	6.95951	33.9152
38.5	15.5541	14.3951	12.5215	15.2895	18.8323	6.40175	12.2167	14.6028	3.06089	15.438	8.25019	20.3597	12.5172	7.04034	6.66811	9.95988													19.874	13.6921	21.8019	14.2795	24.8656	46.0568	73.4828	11.4397	10.0686	9.83732	32.6512
39	15.8543	12.0433	11.8426	13.2081	17.7491	0.80153	0.626983	17.5237	1.62824	16.7481	10.6258	19.8403	5.00876	10.3563	8.26634	10.8592													19.7846	12.7187	16.3677	12.3807	16.0035	53.6257	58.7941	8.99621	5.90116	6.84283	32.4861
39.5	14.7788	10.3882	11.5366	12.9206	21.1143	5.74142	11.1174	17.9557	2.02788	16.6937	15.1535	21.3022	7.34338	7.88917	12.0976	14.2589													13.0226	12.1195	15.743	11.4931	15.1291	33.345	74.305	6.29549	11.1551	9.05097	35.886
40	11.4158	12.4217	6.59273	14.7073	21.7521	10.6813	21.6078	18.3878	2.42753	16.6392	19.6812	22.7642	9.678	5.42203	15.9288	17.6585													22.4744	13.2989	21.4962	22.8747	15.2022	24.7947	87.4751	13.0069	3.36893	7.77539	30.711
40.5	12.6879	13.9603	7.87248	10.6275	17.0438	6.86032	14.8724	19.0059	6.55745	14.2905	19.7543	21.5066	13.3968	4.24077	18.1768	16.1201													20.944	10.1752	17.4226	16.4097	17.2528	46.7164	74.7125	11.2743	8.70179	6.32724	31.2859
41	15.3479	15.1142	7.85392	17.8141	20.2061	3.03933	8.13684	19.624	10.6874	11.9418	19.8273	20.2489	17.1157	3.05951	20.4249	14.5817													24.7761	14.8923	11.2497	12.2289	19.7196	45.6364	36.5742	11.7162	8.79728	9.81871	29.0508
41.5	12.0562	16.5735	9.44854	15.3633	17.5378	2.37012	9.07864	17.4734	9.37418	12.6108	17.1149	20.3716	14.7217	3.68545	18.4704	12.0844													10.0119	10.2177	15.4818	11.8561	21.1882	40.6231	48.9352	7.92853	14.1527	9.14947	27.3234
42	13.6153	14.1727	5.97888	15.4366	20.1503	1.7009	10.0205	15.3228	8.06097	13.2798	14.4025	20.4943	12.3277	4.31139	16.516	9.58714													23.5002	16.0925	13.4573	20.3909	17.8619	27.6308	53.8099	3.31382	10.27	11.3728	36.3927
42.5	14.5192	13.1111	7.68188	16.415	22.5232	11.7143	20.6344	15.9765	6.29201	15.0258	11.8141	21.8876	13.8026	7.84921	12.489	9.57129													17.0157	10.0561	15.5998	19.7426	18.8771	43.3185	43.4734	7.12748	13.7972	8.91585	29.8673
43	15.1907	14.2706	7.17014	14.5448	21.1853	21.7277	31.2483	16.6301	4.52304	16.7719	9.22563	23.2809	15.2775	11.387	8.46197	9.55544													25.139	8.47575	20.1154	17.7361	16.9363	12.7984	21.7401	11.3245	15.4388	9.40667	40.8527
43.5	14.3325	17.1425	2.59264	13.7739	26.4454	24.8145	23.2587	15.6166	6.40638	15.3015	11.5188	22.0439	15.9998	11.0602	12.1875	12.4842													17.4263	6.21706	8.93045	16.0703	15.2186	23.7915	78.2917	7.06388	7.8254	9.77425	31.8292
44	12.8858	17.9796	4.18042	13.0506	24.8816	27.9012	15.269	14.6031	8.28971	13.8311	13.812	20.8068	16.7221	10.7333	15.9131	15.413													15.9641	9.6893	20.3376	14.6289	21.9861	56.0197	70.4232	8.1727	16.189	11.4135	41.567
44.5	13.6025	14.9218	6.53251	15.6731	26.134	18.9487	15.3917	15.579	6.52882	17.2379	13.7899	20.4811	13.1723	10.3369	13.9921	12.645													18.3345	6.28636	13.1627	10.8425	20.5436	39.4433	66.0182	8.38645	21.2042	8.48224	43.6333
45	14.7395	14.5184	10.2911	15.9434	25.6198	9.99624	15.5144	16.5548	4.76793	20.6446	13.7678	20.1554	9.6224	9.94044	12.0711	9.87699													15.9526	13.7999	9.07155	7.8582	20.7332	28.8851	24.3501	11.7588	13.1902	8.66272	47.7835
45.5	15.0293	10.939	11.5288	14.4918	20.0461	9.70772	10.8127	17.9425	2.47857	17.8872	15.9529	20.635	10.9315	13.9109	9.89194	10.7246													21.7346	13.3982	18.247	12.9884	18.0394	36.2009	34.6636	10.7695	20.4171	8.64407	46.0589
46	14.0349	12.4733	10.6226	16.3878	22.8608	9.4192	6.11108	19.3302	0.189203	15.1298	18.138	21.1147	12.2407	17.8813	7.71279	11.5722													24.6515	16.0967	15.8179	19.9498	19.2843	38.5679	16.9182	9.08567	9.23623	7.16634	42.828
46.5	16.9156	10.6495	8.04816	14.3122	22.5093	7.36535	9.11569	16.3836	0.73688	15.4915	18.3884	18.791	12.9513	14.0955	8.81519	10.7111													24.8503	8.25624	2.5686	19.8967	19.7751	57.071	40.9551	14.3998	13.8593	9.45176	43.2457
47	15.8951	15.1789	12.9823	20.5151	21.8712	5.31151	12.1203	13.4369	1.28456	15.8531	18.6387	16.4673	13.6618	10.3097	9.91758	9.85006													14.9971	7.77321	10.5262	14.2837	18.4703	27.7832	48.6017	13.4345	15.6589	8.1115	39.2707
47.5	14.3036	15.5379	10.5539	15.4371	22.3831	7.94175	9.71177	15.0677	2.56848	18.8996	19.5292	18.4662	13.3084	9.77152	11.1955	10.8269													16.4094	3.73775	1.23961	13.1911	17.3595	58.0297	32.8741	13.944	11.5231	9.13192	33.7138
48	17.7205	13.4213	6.89402	15.6244	23.986	10.572	7.30326	16.6984	3.85241	21.9461	20.4197	20.465	12.9549	9.2333	12.4735	11.8036													17.176	2.79921	16.6784	13.0059	10.2218	31.9855	66.3626	21.6722	13.807	6.09081	32.032
48.5	16.2464	17.1743	7.7149	16.565	26.1325	16.368	8.63076	17.1595	5.23354	20.254	18.1807	16.3808	16.0217	6.58945	11.8581	11.0104													15.9242	3.78703	8.88193	5.45037	13.4332	50.7922	47.308	8.55138	9.6533	8.89885	43.9141
49	14.1599	15.7861	7.64715	14.706	24.4387	22.164	9.95827	17.6206	6.61467	18.5619	15.9418	12.2966	19.0885	3.9456	11.2427	10.2172													9.6567	10.8684	2.0574	21.4137	19.9335	50.9889	40.5875	21.1269	14.3712	9.67305	40.0819
49.5	13.5096	19.8032	8.23932	16.9457	23.5493	23.939	8.97203	16.9911	4.4554	17.8444	14.9105	17.7335	17.3131	7.01444	12.0465	10.4452													13.4249	6.56898	14.9155	15.7805	23.0101	29.8448	38.9744	10.5729	10.5633	7.18427	38.1146
50	15.5188	17.0686	5.68573	12.7926	22.5084	25.7139	7.9858	16.3617	2.29612	17.127	13.8793	23.1703	15.5376	10.0833	12.8504	10.6731													9.11676	9.02033	7.65735	15.4428	21.0188	43.8202	31.9473	13.8176	7.7007	6.4095	28.9432
50.5	16.7681	13.6632	3.80331	17.3188	24.8886	19.8928	12.0207	16.0501	2.92457	17.2125	15.9536	23.9167	14.7335	8.55516	10.4028	9.4405													18.4371	1.21841	12.9138	14.0219	23.8888	19.7836	39.8888	13.8974	13.3583	8.12921	40.6691
51	14.1968	14.9333	6.35038	16.2244	25.5934	14.0716	16.0556	15.7386	3.55302	17.298	18.028	24.663	13.9294	7.02705	7.95513	8.20792													18.9605	5.654	11.4044	15.1454	19.0889	25.8299	53.3169	8.18534	10.7828	6.3981	46.4496
51.5	13.3252	10.6757	8.8032	14.8415	22.4959	9.16598	4.08233	14.598	2.83434	17.2009	20.7346	22.452	15.309	4.68563	9.98694	8.00288													20.6435	18.8897	11.0618	7.94456	24.9268	17.7468	22.4273	9.75975	10.6933	9.07718	45.2111
52	12.7508	11.8857	13.676	11.2297	20.0472	4.26035	-7.89096	13.4574	2.11566	17.1038	23.4411	20.241	16.6885	2.34421	12.0188	7.79784													19.6332	10.3985	19.3314	20.1551	22.6314	47.6457	32.2382	6.80409	14.5647	9.75283	47.6058
52.5	14.9286	12.7553	6.40416	13.252	23.2099	-0.64649	6.90052	13.7658	0.170691	16.7192	23.0438	20.5978	17.9732	2.76268	10.1276	8.4016													21.7737	11.6982	16.0393	10.6309	18.2069	10.3721	16.9243	9.18193	10.8924	8.10482	55.6592
53	12.5435	13.8894	7.629	15.5687	24.3043	-5.55332	21.692	14.0742	-1.77428	16.3345	22.6464	20.9545	19.2579	3.18115	8.23656	9.00537													22.5933	13.6484	24.497	10.9679	22.3701	30.8467	21.7643	9.55773	12.07	9.61642	53.6015
53.5	13.3681	17.1434	9.64763	12.9667	22.4479	-2.73023	5.91551	13.5659	2.9236	16.3546	20.0174	23.6847	16.9435	6.37185	10.6598	7.99824													23.8884	12.2965	8.88854	9.19371	18.648	14.7837	46.6435	13.4321	8.09286	5.21065	46.302
54	11.069	12.6682	3.80675	17.1274	27.7624	0.092863	-9.86098	13.0576	7.62149	16.3746	17.3883	26.4149	14.6292	9.56255	13.0831	6.99112													21.4343	10.6111	17.4543	4.02654	16.9543	25.3505	16.1801	10.0606	8.13161	7.79449	52.3243
54.5	19.7172	16.4534	6.96912	16.3942	22.0216	4.68609	-6.36524	15.4656	8.81134	16.2699	21.0534	27.0086	17.1686	9.45733	11.2229	7.18754													18.6496	13.275	15.6596	10.3395	20.695	24.6012	43.0048	12.9459	12.5171	9.42849	47.1003
55	13.3984	14.3691	3.52002	17.6033	26.5499	9.27931	-2.8695	17.8736	10.0012	16.1652	24.7186	27.6022	19.7081	9.35211	9.36267	7.38396													25.7547	4.02872	15.9305	7.62145	21.8499	22.6091	37.7461	12.5061	8.85112	7.99926	43.5932
55.5	17.0141	14.8984	4.00924	15.0541	20.4448	7.24041	-6.84225	17.9961	7.93452	16.9029	21.3814	27.1346	17.7821	9.99472	8.04387	9.08564													20.2294	11.167	15.1848	10.8733	21.4635	23.58	42.8283	7.86527	12.4396	10.0128	31.9658
56	15.3416	12.5888	5.8279	14.8953	23.4527	5.20152	-10.815	18.1186	5.86786	17.6406	18.0441	26.667	15.856	10.6373	6.72506	10.7873													25.1096	11.026	14.9198	10.202	26.955	22.133	46.2789	6.38169	11.121	8.23488	35.1235
56.5	10.3541	14.2311	9.06623	17.9895	16.8209	10.5484	-1.77693	17.0572	8.83259	15.2351	18.9818	23.9854	15.43	10.4764	4.8306	10.1463													29.1929	11.6709	4.25287	10.0851	19.9811	26.3011	47.6107	10.2285	8.34306	7.57939	42.9689
57	13.4378	19.7955	16.0494	13.786	20.6873	15.8953	7.26115	15.9957	11.7973	12.8297	19.9195	21.3037	15.0041	10.3154	2.93613	9.50517													24.0049	15.898	9.25041	9.65977	19.1411	23.644	63.0953	15.517	18.54	9.63684	42.9811
57.5	17.5699	17.217	17.9356	16.1026	24.2477	7.27665	6.18243	16.578	8.20565	15.5357	20.6577	22.1152	17.0991	8.0534	7.20312	9.49479													18.9981	10.6659	7.34566	8.29622	18.4493	35.0813	55.6468	10.1325	8.45388	13.1983	59.0677
58	17.3089	14.9253	9.60683	22.6879	20.7079	-1.34199	5.10371	17.1604	4.61398	18.2417	21.396	22.9266	19.1942	5.79142	11.4701	9.4844													17.1733	13.2247	17.6997	17.1691	17.7202	32.1601	54.2897	15.9771	3.97569	10.5354	47.2497
58.5	14.8504	12.3256	9.25694	17.0321	23.6929	8.21592	3.9675	14.2195	7.83546	16.6026	20.7909	23.1969	18.6688	9.85881	10.4977	10.5738													12.7754	9.67505	19.4338	8.93434	18.4478	25.0817	55.6661	11.7118	6.68264	11.4087	51.7824
59	14.0281	12.173	5.70286	17.7987	23.8338	17.7738	2.83129	11.2786	11.0569	14.9634	20.1858	23.4671	18.1434	13.9262	9.52524	11.6631													24.1141	3.28636	9.39927	5.73614	16.8692	29.6764	53.3742	16.6504	10.1937	10.0162	48.2746
59.5	17.2357	14.3219	10.0229	19.0513	23.1383	16.697	0.338142	15.0514	13.882	15.8384	21.2232	21.0192	18.8998	13.4258	9.66752	10.4499													20.363	9.9148	14.4279	9.19963	15.9365	35.015	44.612	16.6629	12.7007	9.88467	37.9044
60	16.1941	14.1169	10.9895	17.625	21.3312	15.6201	-2.15501	18.8242	16.7071	16.7133	22.2605	18.5714	19.6561	12.9253	9.80979	9.23675													19.7112	15.6127	15.8648	18.4346	18.3506	35.5491	39.1859	11.9422	8.77642	8.33178	48.3317
60.5	16.735	13.8223	13.0805	17.8748	23.7848	11.2308	-1.37034	16.5933	13.2137	16.9473	21.2482	20.4663	18.8952	10.2143	11.1615	7.21802													19.1352	10.4686	9.43418	15.8839	17.2464	27.4916	43.738	13.7133	9.17017	7.55136	48.3548
61	17.433	12.3169	12.7725	21.6313	19.4104	6.84146	-0.58567	14.3623	9.72025	17.1812	20.2358	22.3611	18.1342	7.50328	12.5132	5.19929													20.2417	15.9907	12.4139	16.024	18.7611	27.2862	44.3181	12.3533	6.71611	4.31031	55.5433
61.5	13.4996	12.5313	6.11579	23.9662	20.0009	10.4858	8.29986	13.902	9.39813	16.687	21.166	21.6578	19.0747	6.85248	11.9298	7.88818													17.7579	16.7066	7.42034	8.27743	16.3467	31.8466	48.438	9.14875	3.63215	9.44076	53.2515
62	14.9341	11.1495	11.8949	17.1771	24.7721	14.1302	17.1854	13.4417	9.07602	16.1928	22.0963	20.9545	20.0152	6.20167	11.3464	10.5771													19.1978	11.0698	18.0208	9.73686	17.184	50.7294	32.2835	10.5659	1.7264	8.02917	46.877
62.5	14.1899	12.4708	14.8966	24.8405	24.695	14.9492	11.3529	13.5455	2.34206	14.2986	18.3192	20.8427	19.5856	9.72358	12.0686	9.41452													20.3035	18.0016	12.9343	8.37875	17.2583	48.0272	36.9281	11.2498	8.93958	8.03771	45.353
63	15.2991	17.0083	14.4352	21.1814	17.1454	15.7682	5.52032	13.6492	-4.39189	12.4043	14.5422	20.7309	19.1559	13.2455	12.7907	8.25198													27.2777	9.61331	17.7555	12.9912	24.1373	31.8929	48.1997	16.082	15.8356	6.55592	50.9738
63.5	17.4801	17.4963	15.7513	19.547	19.6142	18.0183	6.65863	13.8398	-0.17837	13.303	16.7957	22.3258	17.7828	10.4579	13.7164	8.9365													15.4036	13.8458	19.062	13.5512	16.4708	51.3305	43.4967	9.19382	6.78143	9.43178	59.3073
64	21.8085	19.4903	18.1771	16.8543	19.6776	20.2684	7.79694	14.0305	4.03515	14.2017	19.0492	23.9207	16.4098	7.67027	14.6419	9.62102													30.2872	21.7618	12.8158	5.92946	20.2083	41.9535	31.1119	12.404	18.3729	7.74333	53.6926
64.5	21.3707	14.6937	12.4892	17.3432	20.5477	14.251	16.0099	14.8288	3.04034	14.6979	17.4398	23.6796	18.3007	4.09794	13.229	10.7205													26.5553	13.0767	15.1919	7.59307	17.9026	61.5964	27.0263	8.94829	8.78348	10.4498	66.2926
65	17.5526	12.91	8.82642	15.9897	22.3682	8.2336	24.2228	15.6272	2.04554	15.1941	15.8303	23.4385	20.1917	0.525608	11.816	11.8201													15.8943	16.4857	13.6576	4.04446	21.601	44.9732	46.3262	12.8316	10.82	8.54537	63.5657
65.5	12.8088	15.2589	6.62713	19.5904	24.7798	9.78214	21.8448	17.647	4.39784	16.133	19.8081	22.1668	18.7898	7.26365	11.1782	11.5664													27.5356	13.9727	18.9105	7.40385	24.0324	33.355	36.017	7.11501	9.57906	6.73934	60.6729
66	11.8678	20.8942	7.96144	18.4864	23.5433	11.3307	19.4668	19.6668	6.75014	17.072	23.7859	20.895	17.388	14.0017	10.5403	11.3128													27.3062	10.368	22.8892	7.60569	20.615	45.4097	46.4842	9.24508	14.1881	9.15542	56.8716
66.5	17.7416	23.6259	8.37597	15.3088	22.1301	3.31993	14.5771	18.1954	2.61888	17.2821	24.0279	22.8298	13.6693	12.115	9.65158	8.99793													24.9591	6.57308	20.2202	10.6511	22.8686	44.0842	49.7798	4.78512	2.04412	7.89788	57.0661
67	17.1227	22.1639	9.66941	18.1989	25.4812	-4.69084	9.6873	16.7239	-1.51238	17.4923	24.2699	24.7647	9.95071	10.2283	8.7629	6.68306													19.4643	8.05924	15.2531	9.64807	12.7083	44.0151	47.4506	9.29493	12.2598	6.63998	61.9825
67.5	16.2422	18.0712	8.10226	13.662	21.9269	-2.67321	3.59535	17.5297	3.42885	19.3546	24.069	24.7691	13.4348	7.63327	9.23328	6.83615													19.6634	14.4953	19.1164	12.0068	18.062	38.6253	45.1883	6.79631	15.6318	9.65339	56.5499
68	15.1558	20.1152	14.9435	14.0694	23.1038	-0.65558	-2.4966	18.3354	8.37008	21.2169	23.868	24.7735	16.9189	5.03823	9.70365	6.98924													17.2185	6.99573	14.6792	8.78031	15.3492	54.5241	38.9978	8.18078	4.6726	10.0449	56.5632
68.5	13.7164	21.1581	12.4749	19.2446	23.2097	3.05184	11.1515	15.7231	4.29431	16.9309	24.6617	24.2722	17.5982	4.36575	10.1808	9.09905													18.9393	11.5942	20.4536	15.0029	13.4579	47.5606	35.5014	5.45872	9.30963	9.74961	60.4691
69	17.2144	20.7486	12.2741	15.011	22.9467	6.75925	24.7997	13.1107	0.218539	12.6449	25.4554	23.771	18.2775	3.69326	10.6579	11.2089													24.1861	12.7272	16.3695	10.0108	23.0287	44.8262	56.4862	17.448	13.5426	8.563	60.3484
69.5	20.1319	19.0659	14.5752	13.2959	25.4876	12.3083	15.3519	14.9456	5.18281	13.9355	21.7327	23.5315	20.1079	4.74096	10.7116	12.3143													15.675	-1.83475	25.3265	9.49704	22.7327	33.1737	40.8745	11.0689	10.9441	10.7903	57.486
70	19.0018	22.2892	6.57847	14.2453	21.1351	17.8574	5.90409	16.7804	10.1471	15.2261	18.01	23.2921	21.9383	5.78866	10.7652	13.4198													16.574	14.8799	12.2467	12.5031	19.1219	36.0241	40.4003	12.767	10.5997	10.1369	70.8669
70.5	16.5484	20.1447	9.7708	14.7827	27.1428	12.6329	10.5313	15.6977	4.08489	15.1549	17.3027	22.0329	15.348	5.22606	12.5015	13.6011													18.8176	12.2442	24.5707	11.7641	23.2539	47.0067	45.7719	16.7472	12.0379	11.782	62.1621
71	13.0972	22.4348	12.5111	13.5144	22.9342	7.4083	15.1584	14.615	-1.97731	15.0837	16.5954	20.7737	8.75769	4.66347	14.2379	13.7824													25.5364	8.23081	20.67	11.3884	21.1273	29.0574	50.9948	16.1228	9.9124	11.6158	64.4514
71.5	16.7358	24.1702	10.48	16.1054	22.3728	10.4738	11.3365	17.7694	2.07151	15.467	16.9401	21.8239	11.3837	3.78778	14.4478	13.7247													25.6642	15.7465	24.7425	-2.36045	21.2765	23.7926	64.809	17.7651	19.148	12.4139	63.0612
72	18.7184	21.6178	10.7117	15.8068	25.0347	13.5393	7.51464	20.9238	6.12034	15.8504	17.2848	22.8741	14.0097	2.9121	14.6577	13.6669													19.9383	11.7052	24.1065	12.5932	21.6621	41.8469	31.2487	16.5697	15.2045	8.64945	53.0318
72.5	20.4012	19.6741	10.1632	16.6046	23.1375	17.1634	18.5249	16.8567	6.07783	16.7663	19.9173	21.4691	13.0015	6.12564	14.758	13.0854													21.7378	9.08876	16.9766	6.17866	18.4347	8.62974	59.971	14.1327	21.4146	8.99129	65.0305
73	20.9173	17.679	2.37916	15.8708	23.7749	20.7874	29.5351	12.7897	6.03532	17.6822	22.5498	20.064	11.9932	9.33918	14.8582	12.5039													24.2976	6.52123	10.3882	3.49093	21.5984	27.4016	45.8821	13.9001	19.6634	11.0028	63.9219
73.5	15.496	19.5584	7.81874	15.223	25.8033	15.8598	7.76499	15.2001	6.80002	16.297	24.2155	21.3013	12.4709	7.86721	12.5688	13.4558													25.8061	11.9972	16.5439	0.777682	25.2825	33.773	41.2725	11.8405	18.4138	7.4156	56.2091
74	12.1684	18.7588	10.789	16.5177	25.028	10.9322	-14.0051	17.6105	7.56472	14.9117	25.8812	22.5386	12.9485	6.39524	10.2794	14.4076													27.2216	8.702	12.6954	9.91794	24.7913	31.8897	37.9374	14.1949	16.8172	12.1001	46.2012
74.5	17.0447	18.5082	6.8523	18.1712	25.5209	9.95332	-3.90691	16.8006	5.94833	12.8816	23.0305	22.7204	15.7378	13.5665	12.8407	12.3962													24.313	13.4106	23.4955	10.2596	15.8637	52.3712	37.7394	15.1699	14.4056	13.2195	62.4861
75	20.452	20.4302	4.85695	13.7629	28.0991	8.97439	6.19128	15.9907	4.33195	10.8514	20.1797	22.9023	18.527	20.7377	15.4021	10.3848													26.3175	12.2213	21.2549	2.30234	21.0094	40.439	53.9746	17.3087	23.8707	11.9824	56.4499
75.5	18.9431	17.8581	9.67905	16.9777	24.9668	5.90824	15.4027	18.2682	5.14555	11.6777	20.7232	20.6325	16.6483	14.9065	13.533	12.5415													17.6181	13.6224	25.0786	19.8218	20.4291	39.3226	49.3629	15.7448	23.1998	12.6331	48.2826
76	15.1117	15.4127	11.3611	18.7115	24.7228	2.84209	24.6141	20.5457	5.95916	12.5041	21.2666	18.3626	14.7696	9.07534	11.6639	14.6981													25.6986	8.88147	25.7833	6.23215	20.3354	39.9088	27.7884	9.94574	24.7027	8.93526	43.1014
76.5	15.9237	15.5717	3.4437	17.3888	21.5465	8.04263	26.0864	18.4877	8.74741	13.9877	20.6559	20.4429	15.0382	10.0571	10.0542	14.0959													32.189	2.54629	23.1774	8.1544	19.0071	28.3985	46.1068	6.60975	24.6066	9.5599	37.1111
77	16.7628	17.0722	-1.90346	22.0468	23.6926	13.2432	27.5586	16.4296	11.5357	15.4713	20.0452	22.5231	15.3069	11.0389	8.44463	13.4937													21.8558	2.7787	26.1959	7.47636	18.368	30.6072	43.9641	12.0691	32.9802	8.14162	40.5052
77.5	18.9625	14.803	1.61695	19.6787	23.8143	12.9538	16.6314	15.1974	9.45825	17.2368	16.9	22.4672	17.2941	11.4736	8.16483	14.4727													27.2964	11.9786	19.195	15.1082	20.5238	74.7252	34.3495	21.8275	17.973	10.6508	42.2081
78	20.2655	16.7367	4.50827	19.1613	24.2985	12.6645	5.70423	13.9653	7.38085	19.0023	13.7548	22.4112	19.2814	11.9083	7.88502	15.4517													23.4185	1.52256	25.165	12.248	20.4393	43.0133	49.3038	17.2645	22.9889	8.00889	43.3874
78.5	16.6076	18.0673	6.00176	19.7469	22.9097	15.1677	9.10115	13.0723	5.4596	20.7243	17.4191	23.2341	19.9837	9.15941	8.05132	11.4755													28.2855	17.7918	18.2631	11.4153	28.215	40.8596	70.067	12.2158	25.5052	5.98673	45.0745
79	21.0916	14.3189	4.52686	18.6906	24.3549	17.6708	12.4981	12.1792	3.53835	22.4461	21.0833	24.0571	20.686	6.41048	8.21763	7.49922													35.3768	0.835589	17.1682	17.7443	28.3859	42.602	65.3877	14.7093	15.2858	9.50013	48.1773
79.5	21.9646	15.2041	6.72911	18.2354	26.0057	11.4451	15.9722	11.2574	3.88106	18.2518	22.0623	24.3381	17.5623	8.05397	10.2356	9.11681													29.7447	2.13142	27.6745	15.2351	25.3876	26.5881	57.9857	17.5212	14.8808	7.89062	51.8974
80	21.189	15.4673	7.49787	19.26	25.6064	5.21948	19.4463	10.3356	4.22378	14.0575	23.0413	24.6192	14.4385	9.69747	12.2537	10.7344													26.1208	1.06451	14.5295	8.55684	25.9304	33.837	41.5409	13.2598	29.8657	11.5886	57.6874
80.5	22.3805	15.3146	13.7369	22.2877	23.0876	9.70009	11.9888	13.2883	-0.3959	17.5494	24.2716	21.9874	15.2658	12.4947	12.5684	10.5129													31.2197	8.69364	16.2542	12.4964	30.4958	43.1007	51.8807	11.0285	26.581	9.72864	49.5827
81	21.1442	18.7801	5.92934	20.6065	19.2087	14.1807	4.53127	16.2411	-5.01558	21.0412	25.502	19.3557	16.093	15.2919	12.8831	10.2915													32.9368	5.61242	22.6531	4.41511	26.5136	55.0861	43.7784	16.4325	13.5313	8.54802	47.1645
81.5	17.4429	18.9347	10.9669	22.221	24.8361	5.19477	8.40762	17.8258	-0.70959	20.0136	27.696	17.4357	15.8536	14.1132	12.5886	10.8997													21.6429	6.71667	6.94517	8.11468	24.7227	29.2664	50.2669	21.5376	16.5356	10.8296	53.963
82	17.9995	20.8865	7.25497	19.9927	23.5543	-3.79115	12.284	19.4105	3.59641	18.9861	29.8899	15.5157	15.6142	12.9345	12.2942	11.508													21.2823	15.9794	17.1325	12.9058	27.7029	57.451	40.5459	9.37281	18.8738	10.2001	67.8364
82.5	19.9344	20.9026	4.19111	18.864	26.3433	8.27265	7.30862	18.0572	4.36964	17.3657	26.8119	19.7453	16.011	11.8339	13.2669	10.1319													30.659	6.30882	19.3274	13.5105	30.1172	40.5678	47.8522	13.5548	13.7792	10.1113	59.2829
83	21.3331	19.3369	7.40682	18.0691	23.0249	20.3364	2.33325	16.7038	5.14287	15.7454	23.7339	23.9749	16.4078	10.7333	14.2396	8.75586													23.3341	18.5358	3.89108	10.6908	26.0367	40.3064	56.3147	11.5506	15.0674	10.8132	57.5266
83.5	22.9838	16.7074	9.69402	16.5682	23.4877	9.64776	14.8822	17.2354	6.179	14.6094	23.5902	22.6737	16.4343	9.43642	13.7389	11.3524													32.7009	11.618	16.2594	13.0436	27.2717	60.837	66.2158	14.3123	14.6024	9.75162	67.8834
84	23.0383	16.8316	5.32995	15.6486	23.656	-1.04094	27.4311	17.767	7.21513	13.4735	23.4465	21.3726	16.4607	8.13951	13.2383	13.949													32.7613	9.97349	18.4611	4.80443	27.0409	47.9476	53.0192	15.3438	9.64797	12.961	58.6063
84.5	18.2876	14.2614	5.30065	16.166	25.2623	6.81274	22.2486	18.1906	5.52134	13.6097	21.4723	25.7441	20.3245	9.78079	10.9474	12.9513													32.9671	8.86421	18.5278	18.5361	25.2377	62.9515	51.4493	17.0408	16.0215	12.5783	65.884
85	18.7521	16.3773	8.20253	15.4501	21.069	14.6664	17.0661	18.6141	3.82755	13.7458	19.4982	30.1156	24.1883	11.4221	8.6565	11.9537													25.5015	8.68984	16.2262	6.06269	20.373	54.5823	55.7735	13.5059	20.0256	14.4305	58.5275
85.5	20.1022	15.5575	3.34451	16.7798	24.5993	11.0897	13.2205	14.9741	2.23879	15.9816	18.5128	30.7348	21.3039	10.6329	11.3771	9.37432													30.8786	7.28995	20.3843	16.5649	24.5546	49.1968	29.5617	15.7079	10.3246	16.8606	55.5566
86	17.0713	17.4829	6.15245	20.4637	25.2509	7.513	9.37483	11.3339	0.650024	18.2174	17.5273	31.3539	18.4195	9.84364	14.0976	6.79498													25.5419	2.20642	15.283	17.8951	30.8632	32.1678	50.37	9.3081	10.9951	14.291	48.5276
86.5	19.6295	17.9053	9.29975	20.1916	24.4742	9.36706	4.18159	12.6732	-3.04446	17.296	23.3546	28.8396	16.9799	7.91801	13	8.58342													21.3607	0.726899	20.7232	5.24336	26.6469	63.2808	47.3871	10.872	14.3264	15.1566	51.299
87	17.9741	18.6087	4.49812	21.0799	22.4539	11.2211	-1.01166	14.0124	-6.73895	16.3746	29.1819	26.3254	15.5403	5.99238	11.9023	10.3719													31.8386	-0.92212	28.1131	13.3035	23.7154	54.298	51.2253	19.651	17.5149	12.4561	44.7225
87.5	17.0685	17.153	9.34575	21.0748	25.8817	15.2655	4.45601	13.5355	-4.99169	15.261	23.281	24.0619	12.4859	8.55714	11.7663	11.1915													24.6003	10.5556	24.7709	9.91794	23.8658	57.795	66.3718	26.4175	9.04306	15.7518	48.2235
88	18.3085	21.8958	10.8484	18.1273	27.3536	19.3098	9.92367	13.0585	-3.24443	14.1474	17.3802	21.7984	9.43148	11.1219	11.6303	12.0112													34.7438	6.0133	18.4001	9.00187	23.6935	56.5359	55.839	19.3194	9.98112	14.3701	34.3524
88.5	20.7836	19.7455	6.02034	17.8076	31.1401	11.1625	14.0462	18.0611	5.89259	18.2425	20.0838	22.2338	9.0937	9.25293	10.962	11.5962													29.5654	12.7663	33.3792	16.5493	28.3653	38.3937	56.3933	20.9894	12.0443	16.4436	52.2281
89	20.6952	18.4322	9.37057	21.5797	27.5613	3.01515	18.1687	23.0637	15.0296	22.3377	22.7874	22.6692	8.75591	7.38397	10.2937	11.1813													23.6781	7.14234	20.8163	22.6571	26.6889	46.6963	35.1722	14.49	15.9708	16.635	45.3506
89.5	22.8094	15.5551	2.88841	19.81	25.5667	13.8687	14.5525	23.971	10.864	18.8522	21.5313	22.569	13.2353	10.2024	7.22757	11.736													26.1604	4.49697	14.2825	16.5567	27.2938	39.4311	67.631	17.9835	24.3753	16.0795	47.0064
90	20.4099	18.1153	3.37171	16.9357	27.7461	24.7222	10.9362	24.8782	6.69846	15.3668	20.2751	22.4688	17.7146	13.0208	4.1614	12.2907													30.6354	2.32561	19.0551	26.7706	24.045	42.4162	55.2514	16.2216	20.8359	16.4275	49.2429
90.5	18.3503	17.019	5.68963	20.6642	29.9083	24.1208	9.79725	25.885	7.17494	16.6029	20.3302	22.569	14.908	7.67928	5.14628	12.5189													32.6893	9.02299	19.1042	24.1911	26.2711	33.2551	53.4759	15.5426	30.2192	13.7824	52.0014
91	20.1646	19.1156	5.62829	21.5821	34.4833	23.5194	8.65827	26.8918	7.65142	17.839	20.3852	22.6692	12.1014	2.3378	6.13116	12.747													31.9554	1.01485	22.9504	18.3494	23.7186	48.2539	65.3434	16.4054	35.1427	17.2855	46.4724
91.5	21.1191	15.536	2.83105	19.3918	26.9871	19.2284	9.94591	21.1829	5.1355	17.7173	20.9093	21.4271	15.0594	8.79369	9.43379	11.7037													31.7727	3.75127	28.5937	17.9633	27.1193	41.7496	43.6939	17.0564	22.0521	17.1208	53.4198
92	14.2338	19.7766	5.57389	17.0835	30.3352	14.9374	11.2336	15.4741	2.61959	17.5956	21.4333	20.1849	18.0174	15.2496	12.7364	10.6604													30.1863	12.5069	37.4654	11.7086	29.7439	62.3642	33.8648	13.7242	28.8959	16.8594	49.2939
92.5	15.7646	20.9174	11.965	20.9544	31.3514	13.474	15.3461	14.3089	2.57543	18.832	21.3487	23.4162	13.6916	12.7778	14.7342	11.411													28.0068	4.14804	29.5781	16.0654	27.814	34.7801	48.1202	15.9219	20.045	16.3164	54.2112
93	20.2183	19.4219	9.8803	18.9849	29.0194	12.0107	19.4587	13.1437	2.53126	20.0684	21.2641	26.6474	9.36579	10.306	16.732	12.1616													34.1734	9.17529	21.4885	16.3505	28.8636	47.1035	60.1723	16.5234	17.0743	14.2451	42.6916
93.5	18.7035	16.8378	8.40985	18.2007	29.2813	3.89396	10.5943	12.2094	0.658629	18.4198	19.1852	25.2727	8.65412	10.8745	15.682	10.8969														10.6008	25.6647	17.2335	28.7438	34.3689	66.5648	23.8391	28.3223	9.42715	39.5168
94	16.9644	20.9831	11.0919	16.7351	31.3702	-4.22276	1.72982	11.275	-1.214	16.7711	17.1063	23.8979	7.94246	11.443	14.6321	9.63225														8.60242	19.7898	13.1672	27.3668	29.4996	43.9642	21.0841	13.9076	11.0034	57.4357
94.5	15.0007	23.0525	8.91073	18.4789	25.5851	0.505137	9.67079	13.2742	3.05647	19.302	16.8844	26.4481	14.7423	9.30879	13.8129	10.3823														14.0558	30.0599	18.8793
95	16.9437	22.4682	11.8817	17.7098	28.4484	5.23303	17.6118	15.2734	7.32695	21.8329	16.6625	28.9983	21.5422	7.17454	12.9938	11.1323
95.5
96
96.5
97
97.5
98
98.5
99
99.5
100
100.5
101
101.5
102
102.5
103
103.5
104
104.5
105
105.5
106
106.5
107
107.5
108
108.5
109
109.5
110
110.5
111
111.5
112
112.5
113
113.5
114
114.5
115
115.5
116
116.5
117
117.5
118
118.5
119
119.5
120
120.5
121
121.5
122
122.5
123
123.5
124
124.5
125
125.5
126
126.5
127
127.5
128
128.5
129
129.5
130
130.5
131
131.5
132
132.5
133
133.5
134
134.5
135
135.5
136
136.5
137
137.5
138
138.5
139
139.5
140
140.5
141
141.5
142
142.5
143
143.5
144
144.5
145
145.5
146
146.5
147
147.5
148
148.5
149
149.5
150
150.5

## Sheet: Figure 5I
immobile fraction (%)	UNC-33L::GFP	UNC-33LΔC::GFP
w1	82.6787	75.6761
w2	82.7826	90.4138
w3	91.5429	81.9552
w4	82.3008	88.5171
w5	75.7248	77.6529
w6	89.8019	61.2349
w7	90.4091	53.8576
w8	83.9058	86.4997
w9	95.2374	85.1568
w10	83.4883	89.4522
w11	79.1391	48.2759
w12	76.9161
w13	83.8455
w14	91.0044
w15	88.8885
w16	89.3971

## Sheet: Figure 5J
		UNC-33LΔC::GFP											unc-119(de3); UNC-33LΔC::GFP
time(s)		w1	w2	w3	w4	w5	w6	w7	w8	w9	w10		w1	w2	w3	w4	w5	w6
0		0	0	0	0	0	0	0	0	0	0		0	0	0	0	0	0
0.5		4.40535	-5.90661	-0.44607	11.5664	13.2782	28.4607	4.98173	6.29365	5.44588	4.42379		-2.06711	19.3596	23.1664	20.7744	15.6594	17.1282
1		-1.03819	-7.96289	-0.03607	12.2913	12.8344	32.4247	0.772619	-2.0394	3.53085	9.70168		17.2333	24.6265	40.7855	14.5273	17.2518	8.51419
1.5		6.70266	4.04526	10.7773	13.3318	13.8017	16.3358	-1.99447	0.887236	2.33148	7.59472		94.0999	26.7456	51.6861	39.1609	26.4402	-1.58876
2		3.59076	-1.12944	15.9906	14.7343	6.75923	45.8887	0.951919	2.06818	2.46179	7.47149		90.9757	60.2147	33.2765	58.7142	27.6439	-2.53589
2.5		-1.11602	1.13977	8.47686	17.5291	18.9317	23.9955	4.46662	-1.71013	3.0974	7.65791		66.724	59.6336	37.8377	47.6756	40.9966	3.61832
3		7.74113	0.829575	9.16309	18.9146	19.4059	28.6885	7.04409	-4.25794	6.31471	11.6414		84.6406	47.4998	47.3118	44.219	53.0276	21.0548
3.5		3.37267	16.1189	-1.15208	17.9395	13.7794	34.1142	7.35584	-0.80735	5.98698	15.7187		53.3631	53.3178	47.3763	38.4051	48.7431	31.7898
4		9.85218	2.17732	2.74286	15.7869	9.21688	32.6801	9.41639	0.167126	6.02218	12.2132		55.8648	60.1581	65.1607	21.3875	56.0972	38.6021
4.5		7.12057	6.72647	2.139	20.3801	12.197	25.7647	3.25281	6.92937	4.89904	15.1734		87.0508	74.7053	60.7904	26.6916	50.713	43.8117
5		13.6947	12.8757	10.022	11.6449	29.9342	28.0286	8.49121	14.199	4.98681	14.4675		103.408	60.9445	35.8448	38.556	40.3441	22.2844
5.5		5.96183	21.7637	8.89293	14.509	24.2628	34.1875	8.57685	7.62688	5.22931	24.8499		50.9508	38.6373	63.4396	52.2147	46.3901	29.9791
6		12.9328	10.8026	29.5799	15.5171	25.0295	42.3068	6.27769	4.29955	6.64132	20.4517		64.6025	44.8783	46.8631	47.3608	46.8954	27.9856
6.5		2.55731	8.17849	11.3519	18.2736	12.25	62.151	9.31979	5.66056	7.94705	15.9703		68.2812	35.4077	35.3657	46.7618	46.8145	20.4186
7		6.47088	14.4853	9.78758	17.7031	13.4021	50.6322	4.34867	3.52437	8.16586	19.0578		51.3478	45.1243	43.7755	39.9086	61.7244	36.3432
7.5		8.64553	26.0863	12.823	17.2739	11.5454	23.8834	2.65858	1.45991	6.11534	12.7756		66.8461	59.8978	44.6694	46.3549	49.8318	-1.30542
8		5.49248	11.023	5.35763	12.8173	7.22318	34.7395	10.7689	0.53713	7.97408	9.98832		77.5743	37.4024	72.298	62.4661	56.632	27.9073
8.5		8.94891	18.0457	4.45663	16.4648	10.5507	55.9024	5.84098	1.33536	8.43002	18.2482		100.2	49.1985	59.5936	77.1119	63.8133	14.8206
9		3.94027	10.4905	6.12406	12.7045	12.3732	41.5977	12.8819	-4.85955	8.90569	16.8557		55.1221	30.8552	44.9187	33.4426	75.2935	45.7696
9.5		13.6808	10.8798	9.43414	18.368	7.40623	49.1163	7.98936	0.05678	10.0624	22.0243		92.951	39.0886	47.849	65.4582	53.3359	24.602
10		4.84215	8.08429	12.0819	10.8983	2.34909	46.3631	10.9383	5.7127	9.81872	17.663		86.1194	61.4065	38.0297	51.48	57.816	27.1289
10.5		6.84444	17.6427	6.37836	11.9041	10.0947	15.6819	9.25485	10.4163	11.1273	17.3874		54.802	41.068	49.3794	77.1119	76.9503	36.7717
11		5.9391	13.9471	8.97926	10.8015	10.3107	29.0518	5.70969	4.11351	5.64965	13.5986		26.6628	58.6328	63.0761	62.2654	79.2611	39.8768
11.5		12.4558	9.01955	18.4597	10.7057	18.0634	17.0391	4.73071	6.16742	5.01065	23.9652		58.8057	47.2329	75.7888	74.1385	57.9314	35.5729
12		9.75243	11.4056	9.07033	12.1867	20.6385	37.939	4.17018	5.60578	6.68585	24.2502		76.2766	76.3801	104.057	69.0838	50.5811	32.9881
12.5		16.9472	11.6183	0.992386	17.6112	10.4682	61.6176	3.05123	0.759475	8.49159	19.0699		83.6022	65.389	97.9796	50.3516	39.9218	33.5822
13		16.1627	11.5424	14.8231	10.8321	40.0975	47.4397	4.63631	4.45415	7.80904	19.8861		103.587	40.8207	73.8698	77.749	45.898	21.0829
13.5		10.7568	15.2233	12.1027	10.7209	35.5735	31.6163	2.14282	6.94584	8.96026	31.9501		103.107	48.12	102.047	74.2447	55.9118	38.2714
14		6.16773	12.7081	9.82664	13.4696	18.8353	60.1481	2.37661	5.05363	7.39589	25.1161		56.5068	60.9046	82.0365	68.1918	63.592	25.8805
14.5		4.81471	13.5092	15.5577	7.3983	16.7055	30.0335	5.5088	5.79692	6.8165	17.9768		76.2658	42.161	109.165	70.2458	65.0909	51.794
15		5.91798	20.2221	13.3974	16.68	26.4754	58.4003	9.28645	7.40126	5.16553	20.4392		105.141	57.7239	88.6146	71.8303	51.0139	24.325
15.5		7.60663	18.807	17.5093	11.3511	23.1637	22.2718	13.3588	4.49095	6.08865	22.1142		128.919	67.3722	85.3003	49.1489	49.2487	42.1495
16		5.47851	8.99147	12.2819	14.7343	20.2029	37.4568	6.50305	14.4754	6.16498	16.5481		71.1016	75.6016	91.4653	79.2623	49.3659	42.7827
16.5		6.67228	23.4876	2.50075	12.0665	20.2679	49.5751	5.55024	5.17701	7.84162	20.2818		90.5351	66.3843	62.1753	39.3052	60.0225	57.9386
17		12.9896	13.2714	11.6678	19.7212	23.5465	43.2742	7.51462	8.14753	6.68074	14.2853		95.553	66.4858	83.7951	57.0417	69.0766	50.2146
17.5		17.1729	19.5815	19.0989	12.0299	34.3296	50.5119	3.19066	8.2625	9.00105	26.7342		50.2364	49.3311	83.3448	57.5698	63.6364	40.9233
18		9.64159	18.7893	27.1309	14.3776	22.8036	22.8105	4.75425	8.50292	8.26869	20.7306		70.5506	47.6481	86.1475	99.8329	80.013	39.4962
18.5		9.94723	13.8988	15.0168	10.0724	23.8492	47.8496	10.2258	7.97283	6.47567	26.8975		51.7761	60.473	69.5007	38.7755	58.0133	28.2958
19		11.5162	20.9376	5.27392	16.6613	37.4818	49.8259	5.57337	3.4351	9.63565	17.3768		35.2383	27.924	68.3441	55.8882	64.2063	68.8312
19.5		9.55604	18.509	12.4622	15.4844	27.6687	46.98	6.46071	7.768	7.36282	30.0964		68.1633	52.0912	75.8131	84.2336	77.2978	64.6846
20		2.48583	16.4879	8.30122	17.1938	27.9127	41.9347	4.79371	8.01801	6.6109	24.7777		49.6133	37.0996	65.9048	58.0207	83.3142	37.7641
20.5		12.8414	22.096	9.75805	21.5683	20.0599	39.4017	1.11635	1.27997	7.0448	28.031		72.9761	67.0348	54.7868	108.332	67.1328	3.61459
21		10.6414	12.1844	8.68214	18.6881	19.9001	44.1321	7.55278	11.1037	8.3558	27.163		84.5164	86.4735	61.5284	96.3793	72.1473	16.6623
21.5		13.0346	19.5374	9.91794	18.5279	25.0962	50.8001	7.47087	12.5478	10.4007	28.6234		93.3084	51.3902	81.6969	121.92	73.4899	12.0895
22		9.96975	9.74445	11.2793	14.4523	35.9231	57.6946	7.80878	17.8954	6.00008	25.7797		100.585	50.2739	67.5669	108.421	88.9664	31.6759
22.5		9.51644	8.65358	2.94633	17.9979	15.7232	53.4836	2.23293	14.3925	4.73064	28.5405		94.9798	54.6015	51.2103	83.802	106.604	31.9837
23		4.32079	20.0612	2.57992	22.3607	32.7642	29.1828	5.87621	15.1064	7.62887	21.1514		94.0435	48.8706	56.4828	83.6052	85.5778	17.8253
23.5		13.3547	20.1481	11.2025	20.5392	22.3727	47.15	8.89292	11.9868	6.68054	24.6497		57.3436	61.808	62.7424	79.5447	89.5823	43.7878
24		1.61792	17.9915	2.81939	17.4523	16.3055	58.8307	6.24566	16.0068	6.70077	33.458		79.7205	59.9048	66.3936	70.9793	89.5455	46.6163
24.5		6.28476	10.8548	14.5895	21.4479	15.9408	44.3961	0.106512	8.12081	3.98531	26.3304		94.3841	67.1546	66.5138	38.6616	73.1644	41.359
25		9.72811	21.4625	16.5259	23.1334	23.7994	53.1937	1.88882	9.18308	4.59779	27.3503		80.8958	85.2532	46.447	103.454	90.2626	36.8612
25.5		10.8352	12.275	10.0368	17.3663	32.4207	37.3601	1.92805	3.97837	6.67192	34.3358		129.069	87.1762	48.2356	85.8381	65.7572	36.2735
26		9.44318	12.124	11.5263	20.944	22.2525	50.1393	3.18096	8.52338	6.31794	30.9317		83.6682	54.73	51.7158	58.0709	68.1561	29.3397
26.5		7.82363	0.298138	19.6963	18.3485	40.9312	67.9682	4.27135	12.6578	6.19321	28.5658		92.9645	63.473	36.2743	64.9173	70.1385	49.8792
27		7.97145	17.9866	9.54485	16.7415	45.4755	49.0538	8.8543	7.79243	5.95508	32.8103		95.043	53.9735	55.7977	96.8635	70.2664	40.9233
27.5		1.87168	16.8247	10.4874	17.8036	23.0343	47.3437	4.91625	10.0867	8.75656	40.9451		85.2902	56.4321	41.1169	67.2222	77.3295	32.9176
28		7.30284	19.925	12.177	19.9946	28.8359	45.6165	2.79428	4.29678	7.51651	28.5163		75.5764	39.4915	56.4068	93.4402	59.4705	42.4181
28.5		4.10079	18.662	14.0437	16.1854	20.1365	55.9024	8.9746	5.88863	7.88644	34.6999		80.451	66.8945	83.8393	72.7215	52.5915	50.6491
29		6.06227	19.473	13.432	11.7665	41.5758	56.9506	7.6808	7.41471	5.31473	27.081		116.365	69.5497	45.6636	79.7441	58.9344	47.8383
29.5		7.34291	14.3955	5.61909	8.17036	19.18	46.7208	5.56424	5.74675	7.45515	16.5194		115.244	55.6456	46.5435	89.5189	80.9658	46.7677
30		3.31036	18.6052	11.2864	14.1907	24.034	43.8183	3.72997	6.62501	4.93553	28.1446		160.676	47.6839	70.7877	63.535	62.4737	56.6286
30.5		1.65137	17.2514	12.8687	16.8874	22.5979	60.3598	8.22698	3.06389	11.1335	17.8034		132.695	36.2207	54.1963	83.9931	62.7735	55.3959
31		15.875	23.1747	3.35607	14.8719	36.941	35.2623	11.9336	5.77754	8.49058	24.3008		95.4618	36.6816	78.6639	88.9844	82.3857	81.4818
31.5		7.57226	15.1344	11.788	17.206	41.4084	72.5347	3.00431	4.94049	9.10459	29.4361		84.5495	54.8996	94.3603	102.027	53.8368	41.525
32		16.2804	22.4221	20.7852	10.3463	30.3038	59.2735	10.5563	5.85398	6.45383	29.1684		89.5671	47.0207	72.6177	78.4068	52.0263	29.432
32.5		16.276	14.5746	3.26918	20.2494	40.2709	36.7796	11.4765	9.1481	9.14154	25.9528		81.0148	50.5029	68.3053	56.0859	60.5504	59.4094
33		11.9574	13.4573	13.8001	16.4686	39.5676	60.8743	8.20244	9.61483	8.26737	31.6532		83.2108	33.5928	72.8625	62.8685	67.2426	54.3701
33.5		4.06242	10.9911	4.86881	19.5436	49.5155	58.7734	11.0818	11.3684	7.47	26.5571		103.632	46.6585	58.5295	65.3374	60.3346	35.7909
34		4.02163	18.4124	7.82383	20.322	50.6037	47.829	11.342	11.1744	5.78688	35.8162		106.601	39.4915	64.6296	74.6417	57.7615	44.3257
34.5		13.8247	26.0112	9.64287	22.2363	29.0729	42.5153	6.40037	5.54537	4.78906	22.793		148.031	54.0017	55.7832	94.879	68.2447	65.4535
35		11.5325	1.58289	16.0039	18.6239	24.0719	44.8675	5.02998	11.49	4.56603	25.7437		166.247	77.7533	90.9362	76.5385	59.7156	71.1246
35.5		8.687	22.5845	11.7253	16.6403	36.7326	46.4572	3.20347	3.19569	8.06621	26.6889		98.403	94.6919	77.1189	77.1119	66.9073	64.8919
36		16.3007	19.6577	13.0673	16.7901	42.208	26.6791	6.66903	3.1692	5.59429	19.1397		121.607	75.362	63.8837	50.7182	86.6488	50.7261
36.5		16.6732	11.3148	7.59946	13.4739	30.3853	46.912	6.73446	6.48974	11.1702	24.0335		58.9737	43.0895	55.9575	87.493	85.859	52.4693
37		7.60785	15.215	3.99516	16.6655	36.821	60.1277	4.48212	9.66483	6.13567	23.4308		66.4967	93.689	61.4901	81.8343	98.9172	57.3469
37.5		8.66846	16.6908	12.1015	17.3094	22.9367	60.0942	7.23252	8.41128	7.33213	26.9477		65.6613	34.9001	72.9879	88.9566	72.1473	16.9563
38		14.378	12.6672	7.02761	15.8603	36.7786	58.8058	7.76139	10.1591	6.95951	33.9152		85.3966	70.839	60.3283	98.883	90.2648	59.7939
38.5		13.6921	21.8019	14.2795	24.8656	46.0568	73.4828	11.4397	10.0686	9.83732	32.6512		86.1644	52.8387	80.591	82.5856	62.263	44.3901
39		12.7187	16.3677	12.3807	16.0035	53.6257	58.7941	8.99621	5.90116	6.84283	32.4861		101.268	90.1269	74.5047	41.8666	80.6539	88.7224
39.5		12.1195	15.743	11.4931	15.1291	33.345	74.305	6.29549	11.1551	9.05097	35.886		101.804	100.941	111.484	62.9447	66.1362	53.2275
40		13.2989	21.4962	22.8747	15.2022	24.7947	87.4751	13.0069	3.36893	7.77539	30.711		63.8316	103.879	106.677	69.7528	78.9098	79.4757
40.5		10.1752	17.4226	16.4097	17.2528	46.7164	74.7125	11.2743	8.70179	6.32724	31.2859		53.0965	97.5573	83.1586	28.5905	77.8489	56.2531
41		14.8923	11.2497	12.2289	19.7196	45.6364	36.5742	11.7162	8.79728	9.81871	29.0508		71.3874	69.0234	59.2366	49.0136	96.0262	72.8156
41.5		10.2177	15.4818	11.8561	21.1882	40.6231	48.9352	7.92853	14.1527	9.14947	27.3234		95.7955	71.367	84.7194	77.1119	74.6389	59.0656
42		16.0925	13.4573	20.3909	17.8619	27.6308	53.8099	3.31382	10.27	11.3728	36.3927		111.401	58.2437	104.362	58.6345	61.19	53.6449
42.5		10.0561	15.5998	19.7426	18.8771	43.3185	43.4734	7.12748	13.7972	8.91585	29.8673		105.883	48.7409	112.686	85.14	92.19	61.9302
43		8.47575	20.1154	17.7361	16.9363	12.7984	21.7401	11.3245	15.4388	9.40667	40.8527		112.905	67.1478	98.9773	70.9888	75.0532	49.063
43.5		6.21706	8.93045	16.0703	15.2186	23.7915	78.2917	7.06388	7.8254	9.77425	31.8292		98.8156	62.5554	105.278	49.5153	74.4857	39.9348
44		9.6893	20.3376	14.6289	21.9861	56.0197	70.4232	8.1727	16.189	11.4135	41.567		70.1793	77.4702	85.8438	102.916	76.425	64.1259
44.5		6.28636	13.1627	10.8425	20.5436	39.4433	66.0182	8.38645	21.2042	8.48224	43.6333		38.6637	48.6439	67.2531	81.2644	73.0325	62.885
45		13.7999	9.07155	7.8582	20.7332	28.8851	24.3501	11.7588	13.1902	8.66272	47.7835		66.5245	69.1889	52.4376	59.5505	80.0063	66.8141
45.5		13.3982	18.247	12.9884	18.0394	36.2009	34.6636	10.7695	20.4171	8.64407	46.0589		80.1577	60.7283	105.549	49.4475	83.5923	57.7133
46		16.0967	15.8179	19.9498	19.2843	38.5679	16.9182	9.08567	9.23623	7.16634	42.828		106.486	102.065	76.9865	74.5222	102.115	44.8529
46.5		8.25624	2.5686	19.8967	19.7751	57.071	40.9551	14.3998	13.8593	9.45176	43.2457		72.4074	62.8634	64.6652	102.2	87.685	49.6125
47		7.77321	10.5262	14.2837	18.4703	27.7832	48.6017	13.4345	15.6589	8.1115	39.2707		83.2108	94.0052	66.2513	63.3495	91.6782	71.5052
47.5		3.73775	1.23961	13.1911	17.3595	58.0297	32.8741	13.944	11.5231	9.13192	33.7138		75.068	63.2198	83.2396	56.4682	91.4382	51.1433
48		2.79921	16.6784	13.0059	10.2218	31.9855	66.3626	21.6722	13.807	6.09081	32.032		85.7101	65.8576	77.7857	46.6255	80.289	79.0851
48.5		3.78703	8.88193	5.45037	13.4332	50.7922	47.308	8.55138	9.6533	8.89885	43.9141		70.4995	71.6668	107.737	66.1056	61.3129	44.8169
49		10.8684	2.0574	21.4137	19.9335	50.9889	40.5875	21.1269	14.3712	9.67305	40.0819		84.7221	57.7561	77.2665	51.3809	62.8158	4.84692
49.5		6.56898	14.9155	15.7805	23.0101	29.8448	38.9744	10.5729	10.5633	7.18427	38.1146		58.674	43.8235	87.5599	70.6186	55.855	70.2519
50		9.02033	7.65735	15.4428	21.0188	43.8202	31.9473	13.8176	7.7007	6.4095	28.9432		76.4772	78.0499	77.5923	55.4572	73.1204	61.2881
50.5		1.21841	12.9138	14.0219	23.8888	19.7836	39.8888	13.8974	13.3583	8.12921	40.6691		99.5786	64.2791	63.6464	78.1411	72.1259	35.6109
51		5.654	11.4044	15.1454	19.0889	25.8299	53.3169	8.18534	10.7828	6.3981	46.4496		71.9204	73.2164	66.5821	84.0928	78.8622	47.8485
51.5		18.8897	11.0618	7.94456	24.9268	17.7468	22.4273	9.75975	10.6933	9.07718	45.2111		86.0995	93.685	47.3949	42.9498	67.3245	35.804
52		10.3985	19.3314	20.1551	22.6314	47.6457	32.2382	6.80409	14.5647	9.75283	47.6058		84.2911	69.4291	65.2465	128.454	64.0816	50.4219
52.5		11.6982	16.0393	10.6309	18.2069	10.3721	16.9243	9.18193	10.8924	8.10482	55.6592		95.6319	58.4767	59.4475	106.233	66.0015	59.663
53		13.6484	24.497	10.9679	22.3701	30.8467	21.7643	9.55773	12.07	9.61642	53.6015		74.298	70.3568	64.8765	113.668	95.0759	61.9129
53.5		12.2965	8.88854	9.19371	18.648	14.7837	46.6435	13.4321	8.09286	5.21065	46.302		56.4404	73.2234	68.9064	90.3009	94.6678	40.3077
54		10.6111	17.4543	4.02654	16.9543	25.3505	16.1801	10.0606	8.13161	7.79449	52.3243		42.6983	60.28	56.885	75.3667	63.8057	43.9573
54.5		13.275	15.6596	10.3395	20.695	24.6012	43.0048	12.9459	12.5171	9.42849	47.1003		65.0662	99.1251	75.1825	39.3896	52.5544	47.8937
55		4.02872	15.9305	7.62145	21.8499	22.6091	37.7461	12.5061	8.85112	7.99926	43.5932		91.2409	83.7214	76.5332	106.15	64.8761	75.8086
55.5		11.167	15.1848	10.8733	21.4635	23.58	42.8283	7.86527	12.4396	10.0128	31.9658		102.827	61.9538	53.2266	43.5828	71.368	53.1329
56		11.026	14.9198	10.202	26.955	22.133	46.2789	6.38169	11.121	8.23488	35.1235		60.9533	70.6942	53.4041	57.5992	64.3274	39.0279
56.5		11.6709	4.25287	10.0851	19.9811	26.3011	47.6107	10.2285	8.34306	7.57939	42.9689		62.1949	57.2182	85.1321	49.0686	77.111	46.6871
57		15.898	9.25041	9.65977	19.1411	23.644	63.0953	15.517	18.54	9.63684	42.9811		107.782	39.175	77.596	62.1261	71.7933	80.3156
57.5		10.6659	7.34566	8.29622	18.4493	35.0813	55.6468	10.1325	8.45388	13.1983	59.0677		107.597	61.4751	59.3916	67.0768	74.4834	43.3584
58		13.2247	17.6997	17.1691	17.7202	32.1601	54.2897	15.9771	3.97569	10.5354	47.2497		78.5808	75.362	76.4041	68.4148	69.7353	92.3534
58.5		9.67505	19.4338	8.93434	18.4478	25.0817	55.6661	11.7118	6.68264	11.4087	51.7824		90.9274	59.5404	83.4729	61.299	78.9762	68.8312
59		3.28636	9.39927	5.73614	16.8692	29.6764	53.3742	16.6504	10.1937	10.0162	48.2746		98.2531	62.4096	55.7518	66.4078	65.3682	57.7435
59.5		9.9148	14.4279	9.19963	15.9365	35.015	44.612	16.6629	12.7007	9.88467	37.9044		80.451	60.473	57.3293	41.7709	81.1618	63.9094
60		15.6127	15.8648	18.4346	18.3506	35.5491	39.1859	11.9422	8.77642	8.33178	48.3317		83.6894	47.1047	74.0847	51.8179	76.0038	65.4971
60.5		10.4686	9.43418	15.8839	17.2464	27.4916	43.738	13.7133	9.17017	7.55136	48.3548		78.8538	87.7342	41.4322	57.632	67.726	87.1815
61		15.9907	12.4139	16.024	18.7611	27.2862	44.3181	12.3533	6.71611	4.31031	55.5433		63.4947	68.191	63.2742	95.6954	60.5615	73.0651
61.5		16.7066	7.42034	8.27743	16.3467	31.8466	48.438	9.14875	3.63215	9.44076	53.2515		98.8447	95.6608	92.9305	119.761	80.9358	111.155
62		11.0698	18.0208	9.73686	17.184	50.7294	32.2835	10.5659	1.7264	8.02917	46.877		83.7487	98.3559	50.1454	69.9902	60.1521	56.2853
62.5		18.0016	12.9343	8.37875	17.2583	48.0272	36.9281	11.2498	8.93958	8.03771	45.353		126.942	74.7363	47.3672	35.9924	84.9589	66.2827
63		9.61331	17.7555	12.9912	24.1373	31.8929	48.1997	16.082	15.8356	6.55592	50.9738		83.7384	75.8368	56.3691	92.8814	80.5947	46.5882
63.5		13.8458	19.062	13.5512	16.4708	51.3305	43.4967	9.19382	6.78143	9.43178	59.3073		92.4812	36.4298	53.6897	77.1119	79.7727	49.9158
64		21.7618	12.8158	5.92946	20.2083	41.9535	31.1119	12.404	18.3729	7.74333	53.6926		93.3478	64.9296	45.6767	107.422	112.259	46.2411
64.5		13.0767	15.1919	7.59307	17.9026	61.5964	27.0263	8.94829	8.78348	10.4498	66.2926		111.752	78.6365	63.8671	46.5048	97.699	47.3426
65		16.4857	13.6576	4.04446	21.601	44.9732	46.3262	12.8316	10.82	8.54537	63.5657		91.4966	57.5282	56.3265	66.3279	99.2455	36.8042
65.5		13.9727	18.9105	7.40385	24.0324	33.355	36.017	7.11501	9.57906	6.73934	60.6729		58.4267	56.7464	72.0709	45.944	79.8881	35.7651
66		10.368	22.8892	7.60569	20.615	45.4097	46.4842	9.24508	14.1881	9.15542	56.8716		100.058	66.6112	85.6607	60.4823	86.6951	36.6953
66.5		6.57308	20.2202	10.6511	22.8686	44.0842	49.7798	4.78512	2.04412	7.89788	57.0661		59.5785	62.4213	57.6209	77.7922	75.7711	50.0123
67		8.05924	15.2531	9.64807	12.7083	44.0151	47.4506	9.29493	12.2598	6.63998	61.9825		61.0897	101.97	64.8786	44.8865	63.4545	31.1469
67.5		14.4953	19.1164	12.0068	18.062	38.6253	45.1883	6.79631	15.6318	9.65339	56.5499		55.4308	45.9847	77.3627	41.1968	72.2287	37.5207
68		6.99573	14.6792	8.78031	15.3492	54.5241	38.9978	8.18078	4.6726	10.0449	56.5632		63.1595	50.1249	73.936	62.5154	96.2748	31.0666
68.5		11.5942	20.4536	15.0029	13.4579	47.5606	35.5014	5.45872	9.30963	9.74961	60.4691		76.453	38.4947	100.131	72.4288	89.967	39.4687
69		12.7272	16.3695	10.0108	23.0287	44.8262	56.4862	17.448	13.5426	8.563	60.3484		110.966	50.5783	71.8148	57.2895	76.5877	35.9779
69.5		-1.83475	25.3265	9.49704	22.7327	33.1737	40.8745	11.0689	10.9441	10.7903	57.486		146.015	79.2811	89.3513	75.817	82.6231	66.1604
70		14.8799	12.2467	12.5031	19.1219	36.0241	40.4003	12.767	10.5997	10.1369	70.8669		96.7842	82.5267	97.5183	74.3905	92.651	64.9972
70.5		12.2442	24.5707	11.7641	23.2539	47.0067	45.7719	16.7472	12.0379	11.782	62.1621		69.3208	72.6822	77.1879	35.4662	91.7079	64.082
71		8.23081	20.67	11.3884	21.1273	29.0574	50.9948	16.1228	9.9124	11.6158	64.4514		59.5215	66.7219	84.9325	63.7317	78.1642	50.1649
71.5		15.7465	24.7425	-2.36045	21.2765	23.7926	64.809	17.7651	19.148	12.4139	63.0612		87.262	60.5602	80.1672	75.7035	60.0166	42.1073
72		11.7052	24.1065	12.5932	21.6621	41.8469	31.2487	16.5697	15.2045	8.64945	53.0318		125.783	90.4534	77.5996	83.9154	64.154	24.3422
72.5		9.08876	16.9766	6.17866	18.4347	8.62974	59.971	14.1327	21.4146	8.99129	65.0305		96.1748	58.1426	73.6526	59.2717	66.6543	56.5266
73		6.52123	10.3882	3.49093	21.5984	27.4016	45.8821	13.9001	19.6634	11.0028	63.9219		84.0013	49.9416	76.6326	68.9584	61.0875	57.1507
73.5		11.9972	16.5439	0.777682	25.2825	33.773	41.2725	11.8405	18.4138	7.4156	56.2091		69.3604	37.0921	80.6371	80.2479	73.8746	21.2532
74		8.702	12.6954	9.91794	24.7913	31.8897	37.9374	14.1949	16.8172	12.1001	46.2012		87.262	57.3595	70.5738	81.5023	96.3972	26.2072
74.5		13.4106	23.4955	10.2596	15.8637	52.3712	37.7394	15.1699	14.4056	13.2195	62.4861		93.2842	95.3827	51.6778	61.9941	74.08	43.4894
75		12.2213	21.2549	2.30234	21.0094	40.439	53.9746	17.3087	23.8707	11.9824	56.4499		78.9535	83.6923	85.2521	68.4663	73.8827	29.8072
75.5		13.6224	25.0786	19.8218	20.4291	39.3226	49.3629	15.7448	23.1998	12.6331	48.2826		116.4	64.7154	50.921	60.4823	73.097	55.6178
76		8.88147	25.7833	6.23215	20.3354	39.9088	27.7884	9.94574	24.7027	8.93526	43.1014		115.702	82.0655	52.5232	78.9645	71.4399	37.6435
76.5		2.54629	23.1774	8.1544	19.0071	28.3985	46.1068	6.60975	24.6066	9.5599	37.1111		114.482	87.2139	58.9903	78.9645	59.9081	30.6304
77		2.7787	26.1959	7.47636	18.368	30.6072	43.9641	12.0691	32.9802	8.14162	40.5052		97.6919	64.0503	68.8646	101.335	58.5777	52.0832
77.5		11.9786	19.195	15.1082	20.5238	74.7252	34.3495	21.8275	17.973	10.6508	42.2081		123.154	100.035	41.6148	106.5	70.4415	50.3042
78		1.52256	25.165	12.248	20.4393	43.0133	49.3038	17.2645	22.9889	8.00889	43.3874		148.13	69.1392	49.7189	97.4909	73.5276	61.5284
78.5		17.7918	18.2631	11.4153	28.215	40.8596	70.067	12.2158	25.5052	5.98673	45.0745		90.6291	87.0204	63.7306	91.3154	81.8967	65.1744
79		0.835589	17.1682	17.7443	28.3859	42.602	65.3877	14.7093	15.2858	9.50013	48.1773		102.423	100.32	84.3121	84.471	66.8044	45.1008
79.5		2.13142	27.6745	15.2351	25.3876	26.5881	57.9857	17.5212	14.8808	7.89062	51.8974		86.6224	80.2713	62.9933	111.716	68.4517	33.6061
80		1.06451	14.5295	8.55684	25.9304	33.837	41.5409	13.2598	29.8657	11.5886	57.6874		82.2084	46.9533	76.8625	92.9049	77.5975	36.1952
80.5		8.69364	16.2542	12.4964	30.4958	43.1007	51.8807	11.0285	26.581	9.72864	49.5827		65.9489	61.5218	70.2711	87.8959	88.5607	56.2531
81		5.61242	22.6531	4.41511	26.5136	55.0861	43.7784	16.4325	13.5313	8.54802	47.1645		112.227	69.0874	72.5676	64.4963	72.3629	63.3625
81.5		6.71667	6.94517	8.11468	24.7227	29.2664	50.2669	21.5376	16.5356	10.8296	53.963		90.5549	76.1039	64.4398	39.419	91.1134	65.6071
82		15.9794	17.1325	12.9058	27.7029	57.451	40.5459	9.37281	18.8738	10.2001	67.8364		74.5879	82.2655	61.8409	55.3692	82.5494	68.4526
82.5		6.30882	19.3274	13.5105	30.1172	40.5678	47.8522	13.5548	13.7792	10.1113	59.2829		70.1221	84.944	85.1881	54.0902	71.9879	81.7632
83		18.5358	3.89108	10.6908	26.0367	40.3064	56.3147	11.5506	15.0674	10.8132	57.5266		74.7285	77.981	54.5775	50.8868	65.7475	119.222
83.5		11.618	16.2594	13.0436	27.2717	60.837	66.2158	14.3123	14.6024	9.75162	67.8834		71.332	52.5085	70.1959	60.5835	65.9694	85.7376
84		9.97349	18.4611	4.80443	27.0409	47.9476	53.0192	15.3438	9.64797	12.961	58.6063		75.6193	93.9479	72.3138	51.3809	76.8116	56.397
84.5		8.86421	18.5278	18.5361	25.2377	62.9515	51.4493	17.0408	16.0215	12.5783	65.884		93.6807	71.9265	47.6511	65.9618	75.8791	66.4139
85		8.68984	16.2262	6.06269	20.373	54.5823	55.7735	13.5059	20.0256	14.4305	58.5275		92.1334	74.6748	47.8837	62.2211	54.0539	77.8445
85.5		7.28995	20.3843	16.5649	24.5546	49.1968	29.5617	15.7079	10.3246	16.8606	55.5566		101.176	81.4704	53.5913	63.1236	52.4774	86.9953
86		2.20642	15.283	17.8951	30.8632	32.1678	50.37	9.3081	10.9951	14.291	48.5276		92.2964	109.595	73.1905	76.4198	53.8083	82.0185
86.5		0.726899	20.7232	5.24336	26.6469	63.2808	47.3871	10.872	14.3264	15.1566	51.299		80.0505	77.8411	93.6737	86.801	69.2701	77.3093
87		-0.92212	28.1131	13.3035	23.7154	54.298	51.2253	19.651	17.5149	12.4561	44.7225		106.732	76.7199	84.8362	84.881	84.9207	96.3991
87.5		10.5556	24.7709	9.91794	23.8658	57.795	66.3718	26.4175	9.04306	15.7518	48.2235		79.5376	81.0665	72.0951	86.4302	73.8746	68.9204
88		6.0133	18.4001	9.00187	23.6935	56.5359	55.839	19.3194	9.98112	14.3701	34.3524		59.4714	67.3423	110.721	97.5223	68.8274	58.843
88.5		12.7663	33.3792	16.5493	28.3653	38.3937	56.3933	20.9894	12.0443	16.4436	52.2281		70.3818	57.6476	85.668	81.3692	64.3187	45.1008
89		7.14234	20.8163	22.6571	26.6889	46.6963	35.1722	14.49	15.9708	16.635	45.3506		92.7794	79.4794	65.3709	50.3516	65.6792	83.7898
89.5		4.49697	14.2825	16.5567	27.2938	39.4311	67.631	17.9835	24.3753	16.0795	47.0064		63.4724	62.9502	101.406	46.4163	58.6402	84.2121
90		2.32561	19.0551	26.7706	24.045	42.4162	55.2514	16.2216	20.8359	16.4275	49.2429		78.0934	79.4762	87.3936	65.477	84.583	97.8692
90.5		9.02299	19.1042	24.1911	26.2711	33.2551	53.4759	15.5426	30.2192	13.7824	52.0014		91.2749	82.5335	103.634	107.02	76.3621	79.9573
91		1.01485	22.9504	18.3494	23.7186	48.2539	65.3434	16.4054	35.1427	17.2855	46.4724		61.9691	91.0231	127.443	80.633	57.5106	63.0647
91.5		3.75127	28.5937	17.9633	27.1193	41.7496	43.6939	17.0564	22.0521	17.1208	53.4198		93.261	81.4223	80.3544	80.349	65.6133	85.2374
92		12.5069	37.4654	11.7086	29.7439	62.3642	33.8648	13.7242	28.8959	16.8594	49.2939		114.705	93.4271	87.4795	98.5663	70.2664	97.4069
92.5		4.14804	29.5781	16.0654	27.814	34.7801	48.1202	15.9219	20.045	16.3164	54.2112		111.818	55.276	65.0109	105.892	60.9718	127.515
93		9.17529	21.4885	16.3505	28.8636	47.1035	60.1723	16.5234	17.0743	14.2451	42.6916		76.7131	78.1426	49.4027	92.7918	69.9927	92.3401
93.5		10.6008	25.6647	17.2335	28.7438	34.3689	66.5648	23.8391	28.3223	9.42715	39.5168		59.2332	122.615	58.4308	92.6047	80.0435	50.698
94		8.60242	19.7898	13.1672	27.3668	29.4996	43.9642	21.0841	13.9076	11.0034	57.4357		105.612	100.969	77.1799	84.2336	94.8906	101.287
94.5		14.0558	30.0599	18.8793									64.3554	89.3613	66.8366	198.871	77.0081	47.8677
95													82.3579	52.4081		95.4813	83.9385
95.5
96
96.5
97
97.5
98
98.5

## Sheet: Figure 5K
unc-33LΔC::GFP immobile fraction (%)	wild type	unc-119(de3)
w1	75.6761	13.1401
w2	90.4138	27.3454
w3	81.9552	29.7889
w4	88.5171	25.0289
w5	77.6529	25.685
w6	61.2349	40.3117
w7	53.8576
w8	86.4997
w9	85.1568
w10	89.4522
w11	48.2759
