# Supplementary material for: Cortical anchoring of the microtubule cytoskeleton is essential for neuron polarity
Source: eLife. 2020 Apr 15;9:e55111. doi: 10.7554/eLife.55111 (PMC7159925; doi:10.7554/eLife.55111)
Supplement: Figure 6—figure supplement 1—source data 1. [file elife-55111-fig6-figsupp1-data1.xlsx]

## Sheet: Figure 6 sup 1A
EBP-2 events grow speed (µm/s)	wild type	unc-44	unc-119	unc-33
	0.348	0.373626	0.461538	2.74725
	0.258	0.340659	0.395604	0.989011
	0.382	0.351648	0.516484	0.912088
	0.497	0.362637	0.373626	0.967033
	0.408	0.571429	0.615385	0.659341
	0.475	0.659341	0.362637	0.857143
	0.315	0.263736	0.395604	0.813187
	0.492	0.505495	0.318681	1.20879
	0.392	0.582418	0.318681	0.857143
	0.389	0.406593	0.428571	0.934066
	0.439	0.43956	0.395604	0.626374
	0.397	0.274725	0.351648	0.989011
	0.539	0.428571	1.21978	0.747253
	0.459	0.659341	0.340659	0.582418
	0.408	1.02198	0.571429	0.428571
	0.253	0.373626	0.32967	0.626374
	0.265	0.67033	0.384615	0.472527
	0.424	0.252747	0.472527	0.67033
	0.442	0.450549	0.274725	0.307692
	0.488	0.868132	0.307692	0.373626
	0.52	0.714286	0.791209	0.362637
	0.369	0.43956	0.538462	0.461538
	0.464	0.637363	0.527473	0.395604
	0.646	0.505495	1.10989	0.483516
	0.795	0.461538	0.637363	0.318681
	0.579	0.648352	0.505495	0.67033
	0.57	0.483516	0.681319	0.868132
	0.439	0.703297	0.505495	0.637363
	0.367	0.494505	0.32967	0.67033
	0.411	0.263736	0.450549	0.637363
	0.623	0.43956	0.527473	0.252747
	0.377	0.494505	0.340659	0.912088
	0.348	0.571429	0.373626	0.791209
	0.303	0.32967	0.472527	0.846154
	0.265	0.32967	0.472527	0.923077
	0.361	0.197802	0.307692	0.736264
	0.386	0.505495	0.923077	1.08791
	0.238	0.681319	0.384615	0.967033
	0.259	0.703297	0.461538	1.05495
	0.437	0.956044	0.637363	0.736264
	0.379	0.582418	0.769231	0.703297
	0.364	0.714286	0.813187	0.626374
	0.524	0.406593	0.395604	0.604396
	0.49	0.43956	0.241758	0.791209
	0.549	0.373626	0.186813	0.549451
	0.444	0.659341	0.252747	0.527473
	0.243	1.0989	0.307692	0.901099
	0.581	0.791209	0.318681	1.37363
	0.445	0.384615	0.164835	0.527473
	0.375	0.450549	0.307692	0.659341
	0.596	0.692308	0.362637	0.846154
	0.53	0.604396	0.582418	0.582418
	0.517	0.725275	0.263736	0.692308
	0.369	0.615385	0.406593	0.593407
	0.191	0.505495	0.362637	1.24176
	0.255	0.637363	0.450549	1.15385
		0.648352	0.538462	0.791209
		0.769231	0.472527	1.57143
		0.461538	1.37363	0.450549
		0.582418	0.538462	0.769231
		0.527473	0.637363	0.626374
		0.230769	0.21978	0.351648
		0.472527	0.461538	0.582418
		0.340659	0.791209	0.472527
		0.505495	0.340659	1.71429
		0.56044	0.483516	0.516484
		0.428571	0.406593	0.593407
		0.384615	0.725275	0.527473
		0.362637	1.53846	0.615385
		0.725275	0.472527	0.769231
		0.450549	1.10989	0.714286
		0.340659	0.483516	0.736264
		0.417582	0.318681	0.725275
		1.15385	0.461538	0.461538
		0.32967	0.406593	0.593407
		0.362637	0.362637	0.989011
		0.505495	0.318681	1
		0.417582	0.351648	0.571429
		0.208791	0.43956	0.989011
		0.340659	0.318681	0.549451
		0.32967	0.494505	0.769231
		0.659341	0.274725	0.989011
		0.43956	0.835165	0.538462
		0.417582	0.395604	1.35165
		0.593407	0.626374	0.516484
		0.912088	0.637363	0.857143
		0.56044	0.505495	0.461538
		0.406593	0.472527	0.450549
		0.527473	0.571429	0.714286
		0.879121	0.428571	0.747253
		0.384615	0.362637	0.505495
		0.384615	0.714286	0.703297
		0.406593	0.824176	0.505495
		0.340659	0.395604	0.505495
		0.417582	0.362637	0.516484
		0.428571	0.395604	0.373626
		0.428571	0.516484	0.351648
		0.659341	0.32967	0.681319
		0.505495	0.615385	0.527473
		0.846154	0.285714	0.21978
		0.549451	0.208791	0.67033
		0.549451	0.340659	0.571429
		0.32967	0.263736	0.824176
		0.428571	0.32967	0.538462
		0.285714	0.164835	0.626374
		0.32967	0.648352	1.53846
		0.406593		0.703297
		0.582418		0.604396
		0.78022		0.472527
		0.604396		0.637363
		1.20879		0.505495
		0.89011		0.846154
		0.538462		0.549451
		1		0.637363
		0.791209		1.0989
		0.516484		0.769231
		0.725275		0.747253
		0.351648		0.626374
		0.813187		0.934066
		0.461538		0.648352
		0.626374		0.791209
		0.56044		0.802198
		1.37363		0.593407
		0.318681		0.681319
				0.604396
				0.582418
				0.725275
				0.879121
				0.67033
				0.604396
				0.824176
				1.02198
				0.923077
				0.637363
				1.18681
				0.89011
				0.593407
				0.626374
				0.450549
				0.758242
				0.769231
				0.67033
				0.813187
				0.659341
				0.758242
				0.483516
				0.802198
				1.07692
				0.593407
				0.692308
				0.956044
				0.714286
				0.527473
				0.527473
				0.714286
				0.626374
				0.67033
				0.450549
				0.417582

## Sheet: Figure 6 sup 1B
catastrophy frequency (1/s)	wild type	unc-44	unc-119	unc-33
	0.125	0.066667	0.2	0.25
	0.333333	0.076923	0.125	0.142857
	0.111111	0.166667	0.090909	0.166667
	0.25	0.5	0.142857	0.2
	0.166667	0.333333	0.142857	1
	0.083333	0.125	0.142857	0.2
	0.166667	0.166667	0.111111	0.2
	0.083333	0.166667	0.05	0.333333
	0.071429	0.125	0.111111	0.25
	0.166667	0.052632	0.142857	0.2
	0.083333	0.090909	0.090909	0.25
	0.125	0.333333	0.090909	0.333333
	0.333333	0.1	0.166667	0.166667
	0.125	0.111111	0.027778	0.1
	0.142857	0.333333	0.090909	0.071429
	0.2	0.142857	0.029412	0.25
	0.2	0.142857	0.25	0.142857
	0.090909	0.043478	0.1	0.166667
	0.25	0.2	0.166667	0.25
	0.111111	0.5	0.111111	0.142857
	0.125	0.25	0.111111	0.125
	0.142857	0.111111	0.052632	0.125
	0.142857	0.333333	0.045455	0.166667
	0.111111	0.2	0.111111	0.1
	0.0625	0.166667	0.166667	0.076923
	0.25	0.2	0.125	0.25
	0.25	0.125	0.111111	0.052632
	0.2	0.166667	0.037037	0.333333
	0.2	0.166667	0.125	0.05
	0.125	0.25	0.1	0.058824
	0.5	0.125	0.142857	0.142857
	0.333333	0.25	0.083333	0.1
	0.125	0.142857	0.125	0.142857
	0.333333	0.5	0.1	0.2
	0.076923	0.333333	0.055556	0.142857
	0.2	0.2	0.076923	0.058824
	0.2	0.25	0.04	0.090909
	0.2	0.166667	0.058824	0.090909
	0.1	0.2	0.111111	0.125
	0.333333		0.1	0.333333
	0.1	0.071429	0.076923	0.5
	0.2	0.166667	0.111111	0.25
	0.2	0.083333	0.25	0.333333
	0.333333	0.166667	0.055556
	0.058824	0.2	0.071429	0.142857
	1	0.111111	0.5	0.333333
	0.047619	0.2	0.090909	0.166667
	0.333333	0.066667	0.076923	0.2
	0.2	0.333333	0.166667	0.25
	0.142857	0.0625	0.076923	0.142857
	0.2	0.25	0.090909	0.333333
	0.125	0.333333	0.142857	0.333333
	0.125	0.166667	0.1	0.090909
	0.25	0.111111	0.2	0.090909
	0.111111	0.125	0.0625	0.333333
	0.125	0.166667	0.166667	0.142857
	0.125	0.142857	0.090909	0.142857
	0.2	0.142857	0.142857	0.142857
	0.142857	0.1	0.090909	0.2
	0.333333	0.25	0.166667	0.2
	0.166667	0.111111	0.125	0.2
	0.2	0.142857	0.1	0.25
	0.25	0.076923	0.043478	0.142857
	0.333333	0.125	0.25	0.333333
	0.333333	0.1	0.033333	0.2
	0.25	0.111111	0.142857	0.111111
	0.2	0.04	0.083333	0.333333
	0.2	0.2	0.111111	0.142857
	0.142857	0.055556	0.111111	0.333333
	0.058824	0.090909	0.111111	0.5
	0.076923	0.142857	0.166667	0.076923
	0.2	0.142857	0.2	0.2
	0.25	0.25	0.125	0.2
	0.142857	0.2	0.0625	0.090909
	0.2	0.25	0.038462	0.25
	0.142857	0.5	0.037037	0.166667
		0.25	0.125	0.2
		0.1	0.1	0.2
		1	0.090909	0.111111
		0.066667	0.111111	0.333333
		0.071429	0.071429	0.111111
		0.142857		0.111111
		0.166667		0.166667
		0.142857		0.333333
		0.333333		0.142857
		0.1		0.25
		0.2		0.125
		0.25		0.25
		0.090909		0.2
		0.2		0.333333
		0.25		0.166667
		0.2		0.066667
		0.066667		0.2
		0.125		0.333333
		1		0.25
		0.25		0.111111
		0.090909		0.333333
		0.058824		0.2
		0.5		0.083333
		0.2		0.090909
		0.333333		0.2
		0.125		0.2
		0.111111		0.25
		0.090909		0.142857
		0.166667		0.333333
		0.166667		0.2
		0.25		0.2
		0.333333		0.142857
		0.142857		0.142857
		0.142857		0.090909
		0.2		0.333333
		0.333333		0.142857
		0.2		0.2
		0.142857		0.142857
		0.055556		0.1
		0.066667		0.076923
		0.166667		0.166667
		0.1		0.111111
		0.2		0.125
		0.2		0.333333
		0.25
		0.166667
		0.5
		0.083333
		0.142857
		0.2
		0.333333
		0.2
		0.2
		0.142857
		0.142857
		0.125
		0.5

## Sheet: Figure 6 sup 1C
EBP-2 grow distance(µm)	wild type	unc-44	unc-119	unc-33
	2.78146	5.38462	2.30769	3.95604
	0.728477	7.47253	3.18681	6.37363
	2.31788	2.08791	5.71429	5.82418
	0.860927	1.20879	2.63736	3.2967
	2.98013	0.989011	4.28571	1.64835
	4.90066	4.06593	2.74725	4.28571
	2.84768	3.51648	2.85714	4.06593
	3.77483	2.63736	6.37363	3.62637
	6.88742	5.27473	3.84615	1.53846
	1.39073	7.14286	2.74725	4.28571
	4.70199	2.74725	3.84615	3.73626
	3.11258	1.64835	5.6044	2.96703
	1.85431	4.50549	4.06593	4.50549
	3.50993	2.08791	13.7363	5.82418
	3.77483	1.20879	2.96703	6.04396
	1.72185	2.08791	10.3297	1.64835
	1.92053	4.94505	1.0989	2.08791
	2.78146	11.3187	5.38462	1.53846
	1.52318	1.20879	3.18681	1.64835
	3.97351	0.769231	10	2.74725
	3.90728	0.989011	3.07692	1.86813
	3.64238	2.41758	10.8791	2.52747
	2.58278	0.989011	7.36264	1.53846
	4.17218	1.20879	1.86813	8.68132
	10.3311	1.53846	1.75824	8.68132
	1.65563	1.0989	2.63736	2.52747
	3.17881	3.95604	2.08791	4.72527
	2.84768	3.40659	12.1978	2.1978
	1.78808	0.769231	4.17582	15.8242
	3.50993	0.769231	3.40659	14.3956
	1.19205	2.63736	2.52747	6.48352
	0.993377	0.989011	7.58242	7.36264
	1.98676	2.30769	3.18681	7.58242
	1.92053	1.42857	2.41758	4.83516
	4.76821	1.53846	3.2967	7.36264
	2.05298	1.75824	3.2967	11.8681
	1.65563	0.989011	7.91209	6.92308
	3.11258	1.0989	2.74725	6.7033
	3.77483	1.86813	2.74725	1.64835
	1.19205	3.2967	3.62637	2.52747
	2.64901	1.20879	3.40659	2.08791
	1.12583	2.30769	3.62637	2.30769
	1.12583	1.31868	1.0989	0.879121
	0.993377	1.64835	8.02198	4.17582
	4.03974	1.31868	7.58242	3.73626
	1.12583	3.40659	2.74725	6.92308
	5.43046	10.5495	5.93407	3.95604
	1.65563	2.85714	2.85714	6.26374
	2.45033	9.34066	4.72527	3.18681
	3.84106	2.85714	6.26374	1.64835
	1.39073	3.2967	4.50549	2.30769
	1.52318	4.72527	5.05495	6.92308
	1.19205	4.06593	11.0989	3.84615
	0.993377	5.49451	2.41758	2.1978
	2.18543	3.62637	5.05495	3.2967
	1.52318	5.05495	2.74725	3.62637
	1.25828	4.28571	4.50549	4.17582
	1.12583	5.05495	2.52747	2.63736
	1.52318	2.52747	3.84615	3.07692
	1.25828	5.82418	2.63736	3.84615
	1.78808	5.38462	2.52747	2.85714
	1.0596	5.93407	4.94505	5.16484
	2.98013	4.61538	6.26374	1.86813
	1.65563	2.30769	1.20879	3.62637
	1.78808	4.28571	4.83516	8.9011
	1.19205	8.57143	4.50549	2.96703
	2.11921	1.64835	4.72527	3.73626
	1.39073	7.8022	5.6044	4.06593
	2.58278	4.17582	5.71429	1.0989
	2.58278	2.52747	4.50549	6.7033
	3.24503	1.86813	2.85714	4.28571
	3.31126	1.20879	2.85714	2.30769
	0.993377	1.42857	2.85714	4.94505
	0.860927	0.989011	6.37363	2.85714
	1.72185	1.31868	9.34066	4.50549
	1.25828	1.20879	10.6593	3.51648
	1.52318	4.50549	2.63736	2.52747
		1.53846	2.85714	4.61538
		5.16484	3.73626	1.31868
		5.82418	2.41758	3.40659
		2.30769	4.3956	3.18681
		2.08791		3.18681
		1.64835		0.989011
		1.86813		4.3956
		3.62637		6.15385
		1.64835		5.6044
		1.31868		2.41758
		4.61538		3.18681
		2.1978		2.52747
		2.08791		3.2967
		2.1978		9.56044
		3.18681		5.49451
		2.63736		2.30769
		1.86813		2.96703
		2.63736		5.82418
		4.83516		2.1978
		7.03297		3.95604
		0.989011		9.67033
		2.96703		6.48352
		2.74725		3.40659
		4.50549		3.62637
		4.72527		3.51648
		4.28571		4.72527
		2.30769		3.07692
		2.41758		4.61538
		1.64835		5.93407
		1.20879		2.63736
		2.96703		4.17582
		2.96703		4.3956
		1.53846		8.35165
		1.86813		2.30769
		2.74725		5.6044
		2.30769		2.96703
		7.8022		6.7033
		4.28571		5.27473
		2.41758		6.81319
		0.769231		4.28571
		1.20879		5.6044
		0.769231		3.62637
		1.31868		1.64835
		3.62637
		1.86813
		6.48352
		3.62637
		3.62637
		1.20879
		4.06593
		2.30769
		1.97802
		4.3956
		4.50549
		2.74725

## Sheet: Figure 6 sup 1D
EBP-2 events grow frequncy (#/µm/min)	wild type	unc-44	unc-119	unc-33
	0.191043	0.238121	0.194314	0.157409
	0.191612	0.134126	0.088262	0.120868
	0.239	0.145855	0.133018	0.091919
	0.132747	0.046424	0.161157	0.048004
	0.056383	0.238499	0.161157	0.04249
	0.08413	0.115702	0.161157	0.106851
	0.105247	0.148353	0.161157	0.033801
	0.042786	0.262626	0.161157	0.072488
	0.088962	0.079944	0.161157	0.229594
	0.114533	0.058494		0.059823
	0.118381	0.082193		0.229798
	0.14098	0.111221		0.062347
	0.121202	0.179419		0.313243
	0.02847	0.117779		0.053191
	0.143716	0.154799		0.173554
	0.139521
	0.091312

## Sheet: Figure 6 sup 1E
retrograde EBP-2 growth events in the anterior PVD dendrite (%)
	wild type	unc-33(mn407)	unc33(mn407),unc116lox,CRE
	100	50	0
	100	40	0
	100	15.3846	50
	100	22.2222	9.09091
	100	10.5263	14.2857
	100	0	16.6667
	100	0	0
	100	33.3333	64.2857
