# Supplementary material for: Cortical anchoring of the microtubule cytoskeleton is essential for neuron polarity
Source: eLife. 2020 Apr 15;9:e55111. doi: 10.7554/eLife.55111 (PMC7159925; doi:10.7554/eLife.55111)
Supplement: Figure 6—source data 1. [file elife-55111-fig6-data1.xlsx]

## Sheet: Figure 6D
microtubule sliding speed(µm/s)	wildtype	unc-44	unc-119(ed3)	unc-33(mn407)
w1	0	0.577894	0.08443	0.008341
w2	0	0.528307	0.166139	0.367156
w3	0	0.351739	0.103913	0.202753
w4	0	0.35	0.345836	0.278807
w5	0	0.101724	0.087543	0.084374
w6	0	0.01939	0.13938	0.218673
w7	0	0.034188	0.442368	0.102407
w8	0	0.204817	0.210002	0.317096
w9	0	0.378364	0.420936	0.247263
w10	0	0.102078	0.23055	0.187764
w11		0.17818	0.093317	0.158244
w12		0.202657		0.37262
w13		0.166265		0.108978
w14		0.321071

## Sheet: Figure 6E
microtubule sliding
		Strong Movement	Some Movement	No Movement
	WT	0	0	100
	unc-44	83.3333	16.6667	0
	unc-119	72.7273	27.2727	0
	unc-33	84.6154	15.3846	0
