# Supplementary material for: Cortical anchoring of the microtubule cytoskeleton is essential for neuron polarity
Source: eLife. 2020 Apr 15;9:e55111. doi: 10.7554/eLife.55111 (PMC7159925; doi:10.7554/eLife.55111)
Supplement: Figure 7—source data 1. [file elife-55111-fig7-data1.xlsx]

## Sheet: Figure 7B
microtubule sliding speed(µm/s)	wild type	unc-116	unc-33	unc-116,unc-33	unc-33;klc-2	unc-33;unc104
w1	0	0	0.008341	0	0.143821	0.210595
w2	0	0	0.367156	0	0.072512	0.165612
w3	0	0	0.202753	0	0	0.198109
w4	0	0	0.278807	0	0	0.277919
w5	0	0	0.084374	0	0	0.142757
w6	0	0	0.218673	0	0	0.095896
w7	0	0	0.102407	0	0	0.209313
w8	0	0	0.317096	0		0.238825
w9	0	0	0.247263	0		0.171773
w10	0	0	0.187764	0		0.007446
w11		0	0.158244	0		0.175145
w12			0.37262	0
w13			0.108978

## Sheet: Figure 7C
microtubule sliding
		Strong Movement	Some Movement	No Movement
	WT	0	0	100
	unc-33	84.6154	15.3846	0
	unc-116_lox	0	0	100
	unc-116lox;unc-33	0	0	100
	unc-33;klc-2	14.2857	14.2857	71.4286
	unc-33;unc-104	81.8182	18.1818	0
