# Supplementary material for: Cortical anchoring of the microtubule cytoskeleton is essential for neuron polarity
Source: eLife. 2020 Apr 15;9:e55111. doi: 10.7554/eLife.55111 (PMC7159925; doi:10.7554/eLife.55111)
Supplement: Figure 8—source data 1. [file elife-55111-fig8-data1.xlsx]

## Sheet: Figure 8B
retrograde EBP-2 growth events in the anterior PVD dendrite (%)
	wild-type	unc-33(mn407)	unc-33(mn407);UNC-33S::nanobody	unc-119(ed3)	unc-119(ed3); PVD> unc-33S::nanobody
w1	100	50	100	0	100
w2	100	40	100	0	100
w3	100	15.3846	80	82.1	100
w4	100	22.2222	100	62.5	100
w5	100	10.5263	85.7143	0	75
w6	100	0	100	54.5	100
w7	100	0	81.8182	25	75
w8	100	33.3333		0	75
w9	100			8	100
w10	100			0	100
w11				16.7

## Sheet: Figure 8D
worms mobility (bodybends / 3 min)
	unc-44GFP KI	unc-119(ed3)	unc-119(ed3);unc-44::gfp	vhhGFP::UNC-33S; unc-119(ed3); unc-44::gfp	vhhGFP::UNC-33S;unc-119(ed3)
w1	15	3	3	32	1
w2	34	6	1	20	1
w3	13	2	0	33	0
w4	15	8	12	37	4
w5	23	9	9	35	3
w6	25	2	0	29	4
w7	39	6	1	19	3
w8	25	2	3	9	3
w9	38	4	9	28	2
w10	23	5	7	14	1
w11	12	4	8	34	2
w12	42	2	1	41	6
w13	52	1	2	27	0
w14	37	2	0	45	0
w15	35	4	1	24	2
w16	20	9	2	24
w17	32	6	7	36
w18	19	2	10	41
w19	39		2	20
w20	30		1	17
w21	43		0	10
w22	21			42
w23	45			45
w24				42
w25				25
w26				30
				30
