# Supplementary material for: Cortical anchoring of the microtubule cytoskeleton is essential for neuron polarity
Source: eLife. 2020 Apr 15;9:e55111. doi: 10.7554/eLife.55111 (PMC7159925; doi:10.7554/eLife.55111)
Supplement: Supplementary file 1. — Wildtype (N2) and a strain expressing GFP in neurons (OH441) were used as control strains. Find all identified proteins in separate tabs and the analysis of the data in the combined tab. To analyze Affinity Purification Mass Spectrometry Data, a Fold Change score (FC-Score) is calculated based on computing the ratio of average normalized spectral counts (PSMs) in bait purifications versus negative controls using CRAPome (Mellacheruvu et al., 2013). [file elife-55111-supp1.xlsx]

## Sheet: Combined
Accession	gene name	Description	Score N2	Coverage N2	# Peptides N2	# PSM N2	Score GFP	Coverage GFP	# Peptides GFP	# PSM GFP	Score unc-119	Coverage unc-119	# Peptides unc-119	# PSM unc-119	Primary FC Score
Q10658	unc-119	Protein unc-119 OS=Caenorhabditis elegans GN=unc-119 PE=1 SV=1 - [UN119_CAEEL]					852.497	33.79	4	38	3383.74	83.11	16	130	4.07
Q9N5S7	CELE_F49H12.5	Uncharacterized protein OS=Caenorhabditis elegans GN=CELE_F49H12.5 PE=1 SV=1 - [Q9N5S7_CAEEL]									1259.57	49.03	13	35	25.48
Q965Q9	CELE_Y50D4C.3	Uncharacterized protein OS=Caenorhabditis elegans GN=CELE_Y50D4C.3 PE=1 SV=1 - [Q965Q9_CAEEL]					41.84	2.15	1	1	962.837	37.69	17	30	14.02
O62185	rsr-1	SR protein related OS=Caenorhabditis elegans GN=rsr-1 PE=1 SV=3 - [O62185_CAEEL]									582.988	11.15	4	17	12.89
Q01630	unc-33	Protein unc-33 OS=Caenorhabditis elegans GN=unc-33 PE=2 SV=1 - [UNC33_CAEEL]					47.28	1.76	1	1	660.803	25.76	16	25	11.79
V6CLQ4	pqn-22	Prion-like-(Q/N-rich)-domain-bearing protein OS=Caenorhabditis elegans GN=pqn-22 PE=1 SV=1 - [V6CLQ4_CAEEL]									447.209	17.4	11	14	10.79
Q18026	flu-2	Kynureninase OS=Caenorhabditis elegans GN=flu-2 PE=2 SV=1 - [KYNU_CAEEL]	145.007	13.81	5	6	128.1	10.88	4	4	2710.55	48.33	21	90	10.74
V6CLV0	pqn-22	Prion-like-(Q/N-rich)-domain-bearing protein OS=Caenorhabditis elegans GN=pqn-22 PE=1 SV=1 - [V6CLV0_CAEEL]									425.628	16.02	11	13	10.09
P34600	ZK1098.1	WW domain-containing protein ZK1098.1 OS=Caenorhabditis elegans GN=ZK1098.1 PE=1 SV=2 - [YO61_CAEEL]	44.19	1.52	1	2					511.657	19.89	16	25	9.77
O44706	cyp-33c2	CYtochrome P450 family OS=Caenorhabditis elegans GN=cyp-33c2 PE=1 SV=2 - [O44706_CAEEL]									253.502	23.03	7	10	7.99
Q7JLY2	dur-1	Dauer Up-Regulated OS=Caenorhabditis elegans GN=dur-1 PE=1 SV=1 - [Q7JLY2_CAEEL]									366.782	26.29	7	9	7.29
Q966L6	let-504	Uncharacterized protein OS=Caenorhabditis elegans GN=let-504 PE=1 SV=1 - [Q966L6_CAEEL]									193.34	8.33	3	8	6.6
H2L0I2	lfi-1	Lin-5 (Five) Interacting protein OS=Caenorhabditis elegans GN=lfi-1 PE=1 SV=1 - [H2L0I2_CAEEL]	241.953	5.22	12	15					1543.34	21.7	48	67	6.22
Q95ZQ5	CELE_R186.7	Uncharacterized protein OS=Caenorhabditis elegans GN=CELE_R186.7 PE=1 SV=1 - [Q95ZQ5_CAEEL]	33.5	4.18	1	1	33.03	4.18	1	1	455.623	38.44	11	16	6.05
G5EBE3	cir-1	CIR (Transcription factor CBF1 Interacting coRepressor) homolog OS=Caenorhabditis elegans GN=cir-1 PE=1 SV=1 - [G5EBE3_CAEEL]									353.323	10.89	4	7	5.9
G5EBT5	mog-3	Masculinisation Of Germline OS=Caenorhabditis elegans GN=mog-3 PE=1 SV=1 - [G5EBT5_CAEEL]					39.03	2.66	1	1	258.612	19.51	9	11	5.54
Q19973	cec-5	C.Elegans Chromodomain protein OS=Caenorhabditis elegans GN=cec-5 PE=1 SV=1 - [Q19973_CAEEL]	25.08	2.67	1	1					334.994	14.97	6	10	5.53
A0A0K3ATC0	tbh-1	Tyramine Beta Hydroxylase OS=Caenorhabditis elegans GN=tbh-1 PE=1 SV=1 - [A0A0K3ATC0_CAEEL]	107.89	5.61	2	2					355.733	17.66	7	13	5.33
Q10457	B0286.3	Probable multifunctional protein ADE2 OS=Caenorhabditis elegans GN=B0286.3 PE=1 SV=1 - [PUR6_CAEEL]									121.21	12.53	4	6	5.2
Q9XW17	car-1	Cytokinesis, Apoptosis, RNA-associated OS=Caenorhabditis elegans GN=car-1 PE=1 SV=1 - [Q9XW17_CAEEL]	267.963	18.24	4	6	213.58	18.82	4	5	2013.8	59.12	23	47	5.19
Q9U7E0	xnp-1	Transcriptional regulator ATRX homolog OS=Caenorhabditis elegans GN=xnp-1 PE=1 SV=1 - [ATRX_CAEEL]	189.3	4.27	6	9	0	0.52	1	1	851.576	9.27	13	39	5.06
G5EDQ4	cle-1	CLE-1C protein OS=Caenorhabditis elegans GN=cle-1 PE=1 SV=1 - [G5EDQ4_CAEEL]	36.61	1.85	1	1					290.878	12	6	9	5.04
Q22505	immt-1	Inner Membrane of MiTochondria protein homolog OS=Caenorhabditis elegans GN=immt-1 PE=1 SV=2 - [Q22505_CAEEL]	56.86	3.39	2	2					280.733	17.38	9	11	4.59
Q9N5K1	sacy-1	Suppressor of ACY-4 sterility OS=Caenorhabditis elegans GN=sacy-1 PE=1 SV=1 - [Q9N5K1_CAEEL]	403.826	24.44	12	16	270.366	9.84	6	10	2612.67	53.65	33	88	4.52
O01541	aars-2	Alanine--tRNA ligase, cytoplasmic OS=Caenorhabditis elegans GN=aars-2 PE=2 SV=1 - [SYAC_CAEEL]		0				0			156.883	7.02	5	5	4.5
Q9GYL4	CELE_R04E5.8	Uncharacterized protein OS=Caenorhabditis elegans GN=CELE_R04E5.8 PE=1 SV=1 - [Q9GYL4_CAEEL]									80.46	5.92	5	5	4.5
P91079	sptl-1	Serine palmitoyltransferase 1 OS=Caenorhabditis elegans GN=sptl-1 PE=3 SV=1 - [SPTC1_CAEEL]									160.6	11.79	4	5	4.5
Q23089	xpo-1	EXPOrtin (Nuclear export receptor) OS=Caenorhabditis elegans GN=xpo-1 PE=1 SV=2 - [Q23089_CAEEL]									52.05	3.89	5	5	4.5
Q9U3N5	C35C5.3	Putative selT-like protein C35C5.3 OS=Caenorhabditis elegans GN=C35C5.3 PE=3 SV=2 - [SELT1_CAEEL]									114.2	22.27	4	5	4.5
Q20203	csq-1	Calsequestrin OS=Caenorhabditis elegans GN=csq-1 PE=1 SV=1 - [Q20203_CAEEL]	78.01	8.87	3	4	24.64	3.36	1	1	469.718	26.62	10	20	4.47
G4SL51	pqn-52	Prion-like-(Q/N-rich)-domain-bearing protein OS=Caenorhabditis elegans GN=pqn-52 PE=1 SV=1 - [G4SL51_CAEEL]	245.284	18.75	8	11	37.9562	7.54	3	4	1589.52	51.1	25	49	4.31
Q65ZB1	plin-1	PeriLIpiN homolog OS=Caenorhabditis elegans GN=plin-1 PE=1 SV=1 - [Q65ZB1_CAEEL]	49.98	8.05	2	2					296.048	25.97	8	10	4.22
Q19727	prpf-4	Vertebrate Pre-mRNA Processing Factor OS=Caenorhabditis elegans GN=prpf-4 PE=1 SV=1 - [Q19727_CAEEL]	116.236	2.45	2	4	381.723	12.39	8	14	1580.43	22.06	20	63	4.19
P27604	ahcy-1	Adenosylhomocysteinase OS=Caenorhabditis elegans GN=ahcy-1 PE=3 SV=1 - [SAHH_CAEEL]	501.249	35.7	13	18	224.001	24.71	7	9	3052.26	66.13	27	81	4.07
G5EG14	cacn-1	Cactin OS=Caenorhabditis elegans GN=cacn-1 PE=1 SV=1 - [CATIN_CAEEL]	0	1.07	1	1	160.54	10.5	5	5	505.629	36.68	19	23	3.98
Q27490	his-70	Histone H3.3-like type 1 OS=Caenorhabditis elegans GN=his-70 PE=3 SV=4 - [H33L1_CAEEL]		0				0			67.1397	28.36	2	4	3.8
H2KZA5	CELE_R148.3	Uncharacterized protein OS=Caenorhabditis elegans GN=CELE_R148.3 PE=1 SV=1 - [H2KZA5_CAEEL]		0				0			134.33	2.87	3	4	3.8
P50432	mel-32	Serine hydroxymethyltransferase OS=Caenorhabditis elegans GN=mel-32 PE=1 SV=2 - [GLYC_CAEEL]									124.1	12.03	4	4	3.8
Q21827	R07E5.1	G patch domain-containing protein 1 homolog OS=Caenorhabditis elegans GN=R07E5.1 PE=1 SV=1 - [GPTC1_CAEEL]									104.49	4.19	3	4	3.8
Q20970	mrs-1	Methionine--tRNA ligase, cytoplasmic OS=Caenorhabditis elegans GN=mrs-1 PE=3 SV=1 - [SYMC_CAEEL]									92.6	4.8	4	4	3.8
Q23629	ZK836.2	Probable 2-oxoglutarate dehydrogenase E1 component DHKTD1 homolog, mitochondrial OS=Caenorhabditis elegans GN=ZK836.2 PE=3 SV=4 - [DHTK1_CAEEL]									134.42	6.15	4	4	3.8
O17622	C29F7.3	UMP-CMP kinase 1 OS=Caenorhabditis elegans GN=C29F7.3 PE=1 SV=1 - [KCY1_CAEEL]									168.58	21.47	3	4	3.8
H2KYS1	hsp-43	Heat Shock Protein OS=Caenorhabditis elegans GN=hsp-43 PE=1 SV=1 - [H2KYS1_CAEEL]									152.494	10.6	4	4	3.8
Q9GZH3	T22D1.3	Inosine-5'-monophosphate dehydrogenase OS=Caenorhabditis elegans GN=T22D1.3 PE=3 SV=2 - [IMDH_CAEEL]									116.55	9.55	4	4	3.8
Q19339	acs-14	Fatty Acid CoA Synthetase family OS=Caenorhabditis elegans GN=acs-14 PE=1 SV=1 - [Q19339_CAEEL]									64.89	8.46	4	4	3.8
A8XQ35	rsy-1	Regulator of SYnapse formation OS=Caenorhabditis elegans GN=rsy-1 PE=1 SV=2 - [A8XQ35_CAEEL]									59.6133	8.54	3	4	3.8
O62390	CELE_W01F3.2	Uncharacterized protein OS=Caenorhabditis elegans GN=CELE_W01F3.2 PE=1 SV=1 - [O62390_CAEEL]									160.83	12.38	3	4	3.8
Q20143	CELE_F38B6.4	Uncharacterized protein OS=Caenorhabditis elegans GN=CELE_F38B6.4 PE=1 SV=3 - [Q20143_CAEEL]									50.64	4.82	4	4	3.8
Q17403	ugt-1	UDP-GlucuronosylTransferase OS=Caenorhabditis elegans GN=ugt-1 PE=1 SV=1 - [Q17403_CAEEL]									164.43	9.07	4	4	3.8
Q21080	CELE_K01C8.1	Uncharacterized protein OS=Caenorhabditis elegans GN=CELE_K01C8.1 PE=1 SV=2 - [Q21080_CAEEL]	27.68	2.2	1	1	58.83	8.22	2	2	308.837	20.44	8	12	3.64
P34552	alx-1	Apoptosis-linked gene 2-interacting protein X 1 OS=Caenorhabditis elegans GN=alx-1 PE=2 SV=3 - [ALXA_CAEEL]	20.26	1.59	1	1					74.3602	6.69	5	6	3.59
P28548	kin-10	Casein kinase II subunit beta OS=Caenorhabditis elegans GN=kin-10 PE=1 SV=2 - [CSK2B_CAEEL]	159	27.35	3	5	82.88	5.13	1	2	588.18	37.18	8	20	3.43
Q21166	sur-5	Acetoacetyl-CoA synthetase OS=Caenorhabditis elegans GN=sur-5 PE=2 SV=1 - [SUR5_CAEEL]	34.48	1.71	1	1	56.5533	5.29	3	3	308.839	20.14	12	14	3.42
Q19782	ifd-2	Intermediate filament protein ifd-2 OS=Caenorhabditis elegans GN=ifd-2 PE=3 SV=1 - [IFD2_CAEEL]					46.71	3.84	2	2	265.62	19.41	8	9	3.41
H2L297	CELE_F40F8.11	Uncharacterized protein OS=Caenorhabditis elegans GN=CELE_F40F8.11 PE=1 SV=1 - [H2L297_CAEEL]	70.7933	10.74	3	3	43.55	5.83	2	2	472.2	30.67	8	15	3.31
Q8MPS2	deb-1	DEnse Body OS=Caenorhabditis elegans GN=deb-1 PE=1 SV=1 - [Q8MPS2_CAEEL]	219.502	10.81	10	12	226.444	10.71	9	9	1408.49	35.34	29	52	3.26
O44772	CELE_K04F10.7	Uncharacterized protein OS=Caenorhabditis elegans GN=CELE_K04F10.7 PE=1 SV=1 - [O44772_CAEEL]	305.506	29.01	6	13	439.105	26.62	6	14	2294.83	49.83	15	67	3.24
Q18823	lam-2	Laminin-like protein lam-2 OS=Caenorhabditis elegans GN=lam-2 PE=1 SV=3 - [LAM2_CAEEL]	112.22	1.96	3	6	156.31	2.69	4	5	783.551	13.96	17	28	3.16
G5EGK1	tln-1	TaLiN OS=Caenorhabditis elegans GN=tln-1 PE=1 SV=1 - [G5EGK1_CAEEL]	140.8	2.39	6	7	130.683	1.65	4	4	628.312	10.03	21	27	3.11
Q95Q55	CELE_F38A5.2	Uncharacterized protein OS=Caenorhabditis elegans GN=CELE_F38A5.2 PE=1 SV=2 - [Q95Q55_CAEEL]	24.82	2.44	1	1					100.75	12.67	5	5	3.11
Q22056	CELE_T01C3.2	Transcription and mRNA export factor ENY2 OS=Caenorhabditis elegans GN=CELE_T01C3.2 PE=1 SV=2 - [Q22056_CAEEL]	31.61	15.31	1	1					229.19	55.1	5	5	3.11
Q21281	mup-4	Transmembrane matrix receptor MUP-4 OS=Caenorhabditis elegans GN=mup-4 PE=1 SV=4 - [MUP4_CAEEL]	45.47	0.9	2	2					169.43	1.52	3	7	3.11
O17907	ctg-1	CRAL/TRIO and GOLD domain containing OS=Caenorhabditis elegans GN=ctg-1 PE=1 SV=2 - [O17907_CAEEL]		0							109.887	8.88	3	3	3.1
H2KYC5	ajm-1	Apical Junction Molecule OS=Caenorhabditis elegans GN=ajm-1 PE=1 SV=1 - [H2KYC5_CAEEL]		0				0			72.6258	3.71	3	3	3.1
Q93968	CELE_T01H8.2	Uncharacterized protein OS=Caenorhabditis elegans GN=CELE_T01H8.2 PE=1 SV=1 - [Q93968_CAEEL]		0							65.6252	14.2	3	3	3.1
Q9XWH0	bub-3	Yeast BUB homolog OS=Caenorhabditis elegans GN=bub-3 PE=1 SV=1 - [Q9XWH0_CAEEL]						0			75.8832	11.66	2	3	3.1
P52899	T05H10.6	Probable pyruvate dehydrogenase E1 component subunit alpha, mitochondrial OS=Caenorhabditis elegans GN=T05H10.6 PE=3 SV=1 - [ODPA_CAEEL]									134.717	10.83	3	3	3.1
Q19854	CELE_F28C1.1	Uncharacterized protein OS=Caenorhabditis elegans GN=CELE_F28C1.1 PE=1 SV=2 - [Q19854_CAEEL]									96.6833	4.46	3	3	3.1
Q19491	rsd-6	Uncharacterized protein OS=Caenorhabditis elegans GN=rsd-6 PE=1 SV=3 - [Q19491_CAEEL]									80.5607	5.66	3	3	3.1
Q19663	CELE_F21C10.7	Uncharacterized protein OS=Caenorhabditis elegans GN=CELE_F21C10.7 PE=1 SV=2 - [Q19663_CAEEL]									118.797	1.62	3	3	3.1
A4UVK2	C44C10.9	Uncharacterized protein OS=Caenorhabditis elegans GN=C44C10.9 PE=1 SV=1 - [A4UVK2_CAEEL]									101.48	13.68	3	3	3.1
P91398	cey-3	C. Elegans Y-box OS=Caenorhabditis elegans GN=cey-3 PE=1 SV=1 - [P91398_CAEEL]									162.603	6.04	1	3	3.1
P91276	ima-2	Importin subunit alpha-2 OS=Caenorhabditis elegans GN=ima-2 PE=1 SV=1 - [IMA2_CAEEL]									74.2867	6.4	3	3	3.1
Q09231	C09F5.1	BRICHOS domain-containing protein C09F5.1 OS=Caenorhabditis elegans GN=C09F5.1 PE=4 SV=3 - [YQ21_CAEEL]									52.4667	3.68	2	3	3.1
Q38G51	rbpl-1	Retinoblastoma Binding Protein Like OS=Caenorhabditis elegans GN=rbpl-1 PE=1 SV=1 - [Q38G51_CAEEL]									80.93	5.23	2	3	3.1
Q9XWT4	CELE_Y62H9A.4	Uncharacterized protein OS=Caenorhabditis elegans GN=CELE_Y62H9A.4 PE=1 SV=1 - [Q9XWT4_CAEEL]									35.22	21.23	3	3	3.1
Q22192	ttr-14	TransThyretin-Related family domain OS=Caenorhabditis elegans GN=ttr-14 PE=1 SV=1 - [Q22192_CAEEL]									96.7333	5.42	2	3	3.1
B1Q255	C14H10.3	Uncharacterized protein OS=Caenorhabditis elegans GN=C14H10.3 PE=1 SV=1 - [B1Q255_CAEEL]									36.77	4.63	3	3	3.1
Q21307	mek-1	Dual specificity mitogen-activated protein kinase kinase mek-1 OS=Caenorhabditis elegans GN=mek-1 PE=1 SV=2 - [MEK1_CAEEL]									155.323	12.39	3	3	3.1
Q20974	CELE_F58B4.5	Uncharacterized protein OS=Caenorhabditis elegans GN=CELE_F58B4.5 PE=1 SV=1 - [Q20974_CAEEL]									45.951	5.44	2	3	3.1
O44517	CELE_F56A11.5	Uncharacterized protein OS=Caenorhabditis elegans GN=CELE_F56A11.5 PE=1 SV=1 - [O44517_CAEEL]									59.6233	15	3	3	3.1
O02642	sucl-2	SUCcinyl-CoA Ligase, alpha subunit OS=Caenorhabditis elegans GN=sucl-2 PE=1 SV=1 - [O02642_CAEEL]									128.667	13.08	2	3	3.1
Q20034	CELE_F35D11.4	Uncharacterized protein OS=Caenorhabditis elegans GN=CELE_F35D11.4 PE=1 SV=2 - [Q20034_CAEEL]									83.13	22.41	2	3	3.1
P91071	C18B10.6	Uncharacterized protein OS=Caenorhabditis elegans GN=C18B10.6 PE=4 SV=1 - [P91071_CAEEL]									56.9	9.86	3	3	3.1
O45969	CELE_Y6E2A.4	Uncharacterized protein OS=Caenorhabditis elegans GN=CELE_Y6E2A.4 PE=1 SV=3 - [O45969_CAEEL]									84.37	3.57	2	3	3.1
G5EG65	hid-1	HID-1 OS=Caenorhabditis elegans GN=hid-1 PE=1 SV=1 - [G5EG65_CAEEL]									62.68	3.57	3	3	3.1
Q93839	CELE_F59F4.1	Acyl-coenzyme A oxidase OS=Caenorhabditis elegans GN=CELE_F59F4.1 PE=1 SV=2 - [Q93839_CAEEL]									40.52	5.55	3	3	3.1
Q2L6Y4	ogt-1	O-linked GlcNAc Transferase OS=Caenorhabditis elegans GN=ogt-1 PE=1 SV=1 - [Q2L6Y4_CAEEL]									24.62	3.39	3	3	3.1
P90915	CELE_K07A1.10	Uncharacterized protein OS=Caenorhabditis elegans GN=CELE_K07A1.10 PE=1 SV=3 - [P90915_CAEEL]									83.99	12.2	1	3	3.1
H9G352	unc-52	Uncharacterized protein OS=Caenorhabditis elegans GN=unc-52 PE=1 SV=1 - [H9G352_CAEEL]	664.34	10.9	18	30	687.549	8.39	17	26	4017.2	22.85	39	127	3.08
Q9N302	acs-13	Fatty Acid CoA Synthetase family OS=Caenorhabditis elegans GN=acs-13 PE=1 SV=1 - [Q9N302_CAEEL]	89.1733	5.56	3	3	35.25	2.36	1	1	240.044	14.19	9	11	2.99
Q06561	unc-52	Basement membrane proteoglycan OS=Caenorhabditis elegans GN=unc-52 PE=1 SV=2 - [UNC52_CAEEL]	706.667	7.59	19	31	806.427	6.4	19	30	4241.81	16.03	42	133	2.95
P91427	pgk-1	Probable phosphoglycerate kinase OS=Caenorhabditis elegans GN=pgk-1 PE=3 SV=1 - [PGK_CAEEL]	28.71	3.84	1	1	54.98	2.88	1	1	166.803	23.26	7	7	2.93
P52016	cyn-8	Peptidyl-prolyl cis-trans isomerase 8 OS=Caenorhabditis elegans GN=cyn-8 PE=2 SV=1 - [CYP8_CAEEL]	38.74	2.15	1	1	0	1.29	1	1	195.645	13.3	5	7	2.93
Q8I4F3	CELE_W04D2.6	Uncharacterized protein OS=Caenorhabditis elegans GN=CELE_W04D2.6 PE=1 SV=2 - [Q8I4F3_CAEEL]					20.22	1.8	1	1	95.19	6.21	3	5	2.87
Q966J6	CELE_F41B4.1	Uncharacterized protein OS=Caenorhabditis elegans GN=CELE_F41B4.1 PE=1 SV=2 - [Q966J6_CAEEL]					40.48	5.26	1	1	211.86	15.5	3	5	2.87
Q18211	ran-3	Regulator of chromosome condensation OS=Caenorhabditis elegans GN=ran-3 PE=3 SV=1 - [RCC1_CAEEL]					29.7	2.46	1	1	184.89	8.26	3	5	2.87
Q9BKQ8	Y67D2.6	Probable ATP-dependent RNA helicase DHX35 homolog OS=Caenorhabditis elegans GN=Y67D2.6 PE=3 SV=1 - [DHX35_CAEEL]	26.97	4.1	3	3	56.28	3.83	3	3	395.68	19.26	12	15	2.84
G5EEL1	alp-1	ALP/Enigma encoding OS=Caenorhabditis elegans GN=alp-1 PE=1 SV=1 - [G5EEL1_CAEEL]	44.52	2.02	1	1	35.84	1.4	1	2	225.676	13.64	7	9	2.82
Q8WQB4	CELE_Y105E8A.8	Uncharacterized protein OS=Caenorhabditis elegans GN=CELE_Y105E8A.8 PE=1 SV=1 - [Q8WQB4_CAEEL]	641.255	33.18	11	21	38.63	2.45	1	1	1550.11	48.78	17	42	2.78
Q21253	gsnl-1	Gelsolin-like protein 1 OS=Caenorhabditis elegans GN=gsnl-1 PE=1 SV=1 - [GELS1_CAEEL]	94.0709	9.47	4	4	52.19	4	2	2	385.884	23.16	9	14	2.75
Q21155	rnp-5	RNP (RRM RNA binding domain) containing OS=Caenorhabditis elegans GN=rnp-5 PE=1 SV=3 - [Q21155_CAEEL]	269.955	24.22	5	8	283.835	21.8	4	8	1168.37	29.41	8	34	2.72
P18948	vit-6	Vitellogenin-6 OS=Caenorhabditis elegans GN=vit-6 PE=1 SV=5 - [VIT6_CAEEL]	4019.99	45.25	74	177	660.182	19.81	29	35	10411	61.18	103	384	2.7
Q9TXU2	CELE_H05C05.1	Uncharacterized protein OS=Caenorhabditis elegans GN=CELE_H05C05.1 PE=1 SV=2 - [Q9TXU2_CAEEL]	193.993	11.83	7	10	240.834	11.22	6	8	1270.06	23.05	16	37	2.68
O17966	top-1	DNA topoisomerase 1 OS=Caenorhabditis elegans GN=top-1 PE=2 SV=1 - [TOP1_CAEEL]	39.65	2.11	2	2	24.06	1.12	1	1	169.51	9.31	6	8	2.68
Q21754	plc-4	Phosphoinositide phospholipase C OS=Caenorhabditis elegans GN=plc-4 PE=1 SV=1 - [Q21754_CAEEL]	24.2	2.53	2	2	28.55	1.33	1	1	195.265	12.25	7	8	2.68
Q20875	ddx-15	Pre-mRNA-splicing factor ATP-dependent RNA helicase ddx-15 OS=Caenorhabditis elegans GN=ddx-15 PE=3 SV=1 - [DHX15_CAEEL]	184.834	7.44	6	7	87.43	7.44	5	5	613.4	19.22	16	25	2.65
Q21351	gtbp-1	Ras-Gtpase-activating protein SH3 (Three) domain-Binding Protein OS=Caenorhabditis elegans GN=gtbp-1 PE=1 SV=2 - [Q21351_CAEEL]	123.16	10.99	4	4	147.237	12.68	5	6	649.981	32.14	15	22	2.64
P90900	ifa-4	Intermediate filament protein ifa-4 OS=Caenorhabditis elegans GN=ifa-4 PE=1 SV=3 - [IFA4_CAEEL]	222.652	11.48	7	10	113.14	9.22	6	6	722.888	42.78	25	32	2.63
P17140	let-2	Collagen alpha-2(IV) chain OS=Caenorhabditis elegans GN=let-2 PE=1 SV=2 - [CO4A2_CAEEL]	201.688	1.71	3	9	81.73	0.85	2	4	528.08	3.92	6	26	2.63
Q21432	nas-11	Zinc metalloproteinase nas-11 OS=Caenorhabditis elegans GN=nas-11 PE=1 SV=2 - [NAS11_CAEEL]	45.98	1.55	1	1					65.2634	6.74	4	4	2.63
Q9U2A8	rpl-43	60S ribosomal protein L37a OS=Caenorhabditis elegans GN=rpl-43 PE=3 SV=3 - [RL37A_CAEEL]	86.69	19.78	1	1					199.95	30.77	2	4	2.63
Q86D25	C54C6.6	Cilia- and flagella-associated protein 20 OS=Caenorhabditis elegans GN=C54C6.6 PE=3 SV=1 - [CFA20_CAEEL]	29.48	5.91	1	1					107.78	12.81	2	4	2.63
G5EFP2	CELE_ZK1321.4	Uncharacterized protein OS=Caenorhabditis elegans GN=CELE_ZK1321.4 PE=1 SV=1 - [G5EFP2_CAEEL]	27.13	1.42	1	1					51.9133	10.17	3	4	2.63
Q19680	CELE_F21D5.1	Uncharacterized protein OS=Caenorhabditis elegans GN=CELE_F21D5.1 PE=1 SV=1 - [Q19680_CAEEL]	37.52	2.36	1	1					103.72	11.09	4	4	2.63
G5EFZ1	ipgm-1	2,3-bisphosphoglycerate-independent phosphoglycerate mutase OS=Caenorhabditis elegans GN=ipgm-1 PE=1 SV=1 - [GPMI_CAEEL]	23.36	3.53	1	1					162.083	9.46	4	4	2.63
P91156	acin-1	ACINus (Mammalian Apoptotic Chromatin condensation Inducer in the Nucleus) homolog OS=Caenorhabditis elegans GN=acin-1 PE=1 SV=2 - [P91156_CAEEL]	103.79	3.62	2	5	73.08	6.55	3	4	598.051	16.38	14	19	2.6
Q9XXD4	Y48A6B.3	Putative H/ACA ribonucleoprotein complex subunit 2-like protein OS=Caenorhabditis elegans GN=Y48A6B.3 PE=3 SV=1 - [NHP2_CAEEL]	489.934	36.81	6	20	391.613	36.81	6	15	1874.72	55.83	12	67	2.59
Q9GYF1	unc-27	Troponin I 2 OS=Caenorhabditis elegans GN=unc-27 PE=2 SV=2 - [TNNI2_CAEEL]	40.18	3.31	1	1	38.68	3.31	1	1	86.41	22.31	5	6	2.58
O01542	cpn-3	CalPoNin OS=Caenorhabditis elegans GN=cpn-3 PE=1 SV=1 - [O01542_CAEEL]	79.44	7.75	1	1	106.503	16.2	2	2	261.73	39.44	5	8	2.55
Q10576	dpy-18	Prolyl 4-hydroxylase subunit alpha-1 OS=Caenorhabditis elegans GN=dpy-18 PE=1 SV=2 - [P4HA1_CAEEL]	85.7458	7.87	3	3					93.751	13.6	6	7	2.52
P46551	cdk-12	Cyclin-dependent kinase 12 OS=Caenorhabditis elegans GN=cdk-12 PE=1 SV=4 - [CDK12_CAEEL]	46.31	4.25	3	3	52	4.25	3	3	347.532	10.55	7	13	2.5
P34446	pat-2	Integrin alpha pat-2 OS=Caenorhabditis elegans GN=pat-2 PE=1 SV=1 - [PAT2_CAEEL]					108.86	2.85	2	2	205.013	6.93	6	6	2.43
O17005	mrpl-4	Mitochondrial Ribosomal Protein, Large OS=Caenorhabditis elegans GN=mrpl-4 PE=1 SV=1 - [O17005_CAEEL]					28.51	3.68	1	1	82.8333	17.06	4	4	2.42
G5ECS4	glf-1	GaLactoFuranose synthesis (UGM, UDP-galactopyranose mutase) OS=Caenorhabditis elegans GN=glf-1 PE=1 SV=1 - [G5ECS4_CAEEL]		0							59.51	3.57	2	2	2.4
O45518	CELE_F44G3.2	Uncharacterized protein OS=Caenorhabditis elegans GN=CELE_F44G3.2 PE=1 SV=1 - [O45518_CAEEL]						0			100.15	8.06	2	2	2.4
Q95Y83	mrpl-19	Probable 39S ribosomal protein L19, mitochondrial OS=Caenorhabditis elegans GN=mrpl-19 PE=3 SV=1 - [RM19_CAEEL]									66.05	6.94	1	2	2.4
Q27874	pat-3	Integrin beta pat-3 OS=Caenorhabditis elegans GN=pat-3 PE=1 SV=1 - [PAT3_CAEEL]									86.13	2.6	2	2	2.4
P35129	let-70	Ubiquitin-conjugating enzyme E2 2 OS=Caenorhabditis elegans GN=let-70 PE=1 SV=1 - [UBC2_CAEEL]									44.73	21.09	2	2	2.4
P46579	wars-2	Tryptophan--tRNA ligase, mitochondrial OS=Caenorhabditis elegans GN=wars-2 PE=2 SV=3 - [SYWM_CAEEL]									64.83	6.94	2	2	2.4
Q94218	odr-8	Ufm1-specific protease OS=Caenorhabditis elegans GN=odr-8 PE=1 SV=1 - [UFSP_CAEEL]									46.48	4.24	2	2	2.4
Q02331	ZK370.4	Uncharacterized NTE family protein ZK370.4 OS=Caenorhabditis elegans GN=ZK370.4 PE=3 SV=3 - [YOL4_CAEEL]									66.23	2	2	2	2.4
P54813	ymel-1	ATP-dependent zinc metalloprotease YME1 homolog OS=Caenorhabditis elegans GN=ymel-1 PE=3 SV=2 - [YME1_CAEEL]									61.71	4.43	2	2	2.4
O16991	ttb-1	Transcription initiation factor IIB OS=Caenorhabditis elegans GN=ttb-1 PE=3 SV=2 - [TF2B_CAEEL]									21.36	9.8	2	2	2.4
Q20711	CELE_F53B3.6	Uncharacterized protein OS=Caenorhabditis elegans GN=CELE_F53B3.6 PE=1 SV=1 - [Q20711_CAEEL]									65.76	10.9	2	2	2.4
E5QCJ1	inx-20	Innexin OS=Caenorhabditis elegans GN=inx-20 PE=3 SV=1 - [E5QCJ1_CAEEL]									47.3856	1.53	1	2	2.4
Q9GUP2	eel-1	Enhancer of EfL-1 mutant phenotype OS=Caenorhabditis elegans GN=eel-1 PE=1 SV=2 - [Q9GUP2_CAEEL]									37.26	0.48	2	2	2.4
G4SI07	gei-15	GEX Interacting protein OS=Caenorhabditis elegans GN=gei-15 PE=1 SV=1 - [G4SI07_CAEEL]									36.34	8.56	2	2	2.4
Q9GZI3	pod-2	Uncharacterized protein OS=Caenorhabditis elegans GN=pod-2 PE=1 SV=1 - [Q9GZI3_CAEEL]									26.82	1.07	2	2	2.4
Q9NEZ5	unc-95	Uncharacterized protein OS=Caenorhabditis elegans GN=unc-95 PE=1 SV=2 - [Q9NEZ5_CAEEL]									93.47	10.29	2	2	2.4
G5EBY6	phf-5	PHF-5 OS=Caenorhabditis elegans GN=phf-5 PE=1 SV=1 - [G5EBY6_CAEEL]									62.3103	14.55	2	2	2.4
Q7JK62	acox-1	Acyl-coenzyme A oxidase OS=Caenorhabditis elegans GN=acox-1 PE=1 SV=1 - [Q7JK62_CAEEL]									37.59	2.67	2	2	2.4
Q18244	C27B7.5	Uncharacterized protein OS=Caenorhabditis elegans GN=C27B7.5 PE=1 SV=1 - [Q18244_CAEEL]									101.74	8.81	2	2	2.4
Q9U213	rsr-2	SR protein related OS=Caenorhabditis elegans GN=rsr-2 PE=1 SV=1 - [Q9U213_CAEEL]									96.89	4	1	2	2.4
Q9BL15	CELE_Y48G8AL.5	Uncharacterized protein OS=Caenorhabditis elegans GN=CELE_Y48G8AL.5 PE=1 SV=4 - [Q9BL15_CAEEL]									32.6	4.68	2	2	2.4
O01314	CELE_F02E9.1	Uncharacterized protein OS=Caenorhabditis elegans GN=CELE_F02E9.1 PE=1 SV=1 - [O01314_CAEEL]									92.43	12.34	1	2	2.4
O16486	natc-2	N-alpha-AcetylTransferase C complex subunit OS=Caenorhabditis elegans GN=natc-2 PE=1 SV=1 - [O16486_CAEEL]									74.96	7.55	2	2	2.4
P34666	coq-5	2-methoxy-6-polyprenyl-1,4-benzoquinol methylase, mitochondrial OS=Caenorhabditis elegans GN=coq-5 PE=3 SV=2 - [COQ5_CAEEL]									55.85	11.23	2	2	2.4
Q9TYS1	CELE_D1037.1	Uncharacterized protein OS=Caenorhabditis elegans GN=CELE_D1037.1 PE=4 SV=1 - [Q9TYS1_CAEEL]									85.14	3.82	2	2	2.4
O45494	hinf-1	HIstone Nuclear Factor p (P) homolog OS=Caenorhabditis elegans GN=hinf-1 PE=1 SV=2 - [O45494_CAEEL]									97.64	3.7	2	2	2.4
Q18577	C42D4.1	Uncharacterized protein OS=Caenorhabditis elegans GN=C42D4.1 PE=1 SV=1 - [Q18577_CAEEL]									43.05	7.17	2	2	2.4
Q17636	C04G6.4	Uncharacterized protein OS=Caenorhabditis elegans GN=C04G6.4 PE=1 SV=2 - [Q17636_CAEEL]									57.94	8.61	2	2	2.4
Q22368	CELE_T10B10.3	Uncharacterized protein OS=Caenorhabditis elegans GN=CELE_T10B10.3 PE=1 SV=1 - [Q22368_CAEEL]									78.02	3.51	2	2	2.4
Q9GS00	csn-1	COP9 signalosome complex subunit 1 OS=Caenorhabditis elegans GN=csn-1 PE=1 SV=1 - [CSN1_CAEEL]									38.33	3.16	2	2	2.4
Q93315	cytb-5.1	YTochrome B OS=Caenorhabditis elegans GN=cytb-5.1 PE=1 SV=2 - [Q93315_CAEEL]									66.17	18.66	2	2	2.4
O44502	cogc-8	Conserved oligomeric Golgi complex subunit 8 OS=Caenorhabditis elegans GN=cogc-8 PE=3 SV=1 - [COG8_CAEEL]									47.1	4.17	2	2	2.4
Q9U2Y2	cdkr-3	CDK5RAP3-like protein OS=Caenorhabditis elegans GN=cdkr-3 PE=3 SV=1 - [CK5P3_CAEEL]									58.36	4.29	2	2	2.4
Q94417	clec-91	C-type lectin domain-containing protein 91 OS=Caenorhabditis elegans GN=clec-91 PE=1 SV=1 - [CLC91_CAEEL]									22.01	7.11	2	2	2.4
Q8I4C5	faah-4	Fatty Acid Amide Hydrolase homolog OS=Caenorhabditis elegans GN=faah-4 PE=1 SV=1 - [Q8I4C5_CAEEL]									49.98	3.58	2	2	2.4
A0A0K3AWA7	C29F7.2	Uncharacterized protein OS=Caenorhabditis elegans GN=C29F7.2 PE=1 SV=1 - [A0A0K3AWA7_CAEEL]									59.38	9.18	2	2	2.4
H2KY68	cyp-34a9	CYtochrome P450 family OS=Caenorhabditis elegans GN=cyp-34a9 PE=1 SV=1 - [H2KY68_CAEEL]									46.22	3.61	2	2	2.4
Q9NA75	CELE_Y57A10A.10	Uncharacterized protein OS=Caenorhabditis elegans GN=CELE_Y57A10A.10 PE=1 SV=2 - [Q9NA75_CAEEL]									80.31	9.83	2	2	2.4
G5EDL4	CELE_R05H10.3	Uncharacterized protein OS=Caenorhabditis elegans GN=CELE_R05H10.3 PE=1 SV=1 - [G5EDL4_CAEEL]									21.67	2.54	2	2	2.4
Q9XVZ2	CELE_Y7A5A.1	Uncharacterized protein OS=Caenorhabditis elegans GN=CELE_Y7A5A.1 PE=1 SV=1 - [Q9XVZ2_CAEEL]									38.49	4.28	2	2	2.4
Q21603	ugt-62	UDP-glucuronosyltransferase OS=Caenorhabditis elegans GN=ugt-62 PE=1 SV=1 - [Q21603_CAEEL]									50.83	4.14	2	2	2.4
H2KYY5	pat-12	Paralysed Arrest at Two-fold OS=Caenorhabditis elegans GN=pat-12 PE=1 SV=1 - [H2KYY5_CAEEL]									46.55	2.14	2	2	2.4
O44441	mai-2	ATPase inhibitor mai-2, mitochondrial OS=Caenorhabditis elegans GN=mai-2 PE=3 SV=1 - [ATIF2_CAEEL]									49.0483	14.68	2	2	2.4
P34546	vha-2	V-type proton ATPase 16 kDa proteolipid subunit 2/3 OS=Caenorhabditis elegans GN=vha-2 PE=2 SV=2 - [VATL2_CAEEL]									92.99	18.01	1	2	2.4
G5ECJ8	fmo-3	Dimethylaniline monooxygenase [N-oxide-forming] OS=Caenorhabditis elegans GN=fmo-3 PE=1 SV=1 - [G5ECJ8_CAEEL]									38.92	3.32	2	2	2.4
Q8I7H7	C37C3.2	Uncharacterized protein OS=Caenorhabditis elegans GN=C37C3.2 PE=1 SV=1 - [Q8I7H7_CAEEL]									43.76	5.81	2	2	2.4
H2KZX4	CELE_T13C2.6	Uncharacterized protein OS=Caenorhabditis elegans GN=CELE_T13C2.6 PE=1 SV=1 - [H2KZX4_CAEEL]									62.08	2.64	2	2	2.4
O17736	CELE_D2085.4	Uncharacterized protein OS=Caenorhabditis elegans GN=CELE_D2085.4 PE=1 SV=1 - [O17736_CAEEL]									31.09	1.7	2	2	2.4
Q95PY8	cpsf-3	Cleavage and Polyadenylation Specificity Factor OS=Caenorhabditis elegans GN=cpsf-3 PE=1 SV=2 - [Q95PY8_CAEEL]									23.83	1.84	2	2	2.4
Q21193	pfn-3	Profilin-3 OS=Caenorhabditis elegans GN=pfn-3 PE=2 SV=1 - [PROF3_CAEEL]									62.07	18.25	2	2	2.4
P41949	D1044.1	Uncharacterized kinase-like protein D1044.1 OS=Caenorhabditis elegans GN=D1044.1 PE=3 SV=2 - [YLK1_CAEEL]									74.84	5.24	2	2	2.4
Q94045	T13F2.2	Putative RNA polymerase II transcriptional coactivator OS=Caenorhabditis elegans GN=T13F2.2 PE=3 SV=1 - [TCP4_CAEEL]									58.57	16.13	2	2	2.4
P91223	CELE_F07E5.5	Uncharacterized protein OS=Caenorhabditis elegans GN=CELE_F07E5.5 PE=1 SV=2 - [P91223_CAEEL]									43.86	5.99	2	2	2.4
C0VXV6	mrpl-46	Mitochondrial Ribosomal Protein, Large OS=Caenorhabditis elegans GN=mrpl-46 PE=1 SV=2 - [C0VXV6_CAEEL]									39.6897	7.17	2	2	2.4
G5EC74	noca-1	NOn-Centrosomal microtubule Array OS=Caenorhabditis elegans GN=noca-1 PE=1 SV=2 - [G5EC74_CAEEL]									26.12	1.28	1	2	2.4
Q7KQ32	C38C3.4	Uncharacterized protein OS=Caenorhabditis elegans GN=C38C3.4 PE=1 SV=2 - [Q7KQ32_CAEEL]									55.34	8.18	2	2	2.4
G4SNS6	CELE_Y67D2.4	Uncharacterized protein OS=Caenorhabditis elegans GN=CELE_Y67D2.4 PE=4 SV=2 - [G4SNS6_CAEEL]									58.73	5.46	2	2	2.4
Q9UAV3	ubh-1	Ubiquitin carboxyl-terminal hydrolase OS=Caenorhabditis elegans GN=ubh-1 PE=1 SV=1 - [Q9UAV3_CAEEL]									40.66	11.11	2	2	2.4
Q9N2S1	CELE_Y9C9A.16	Uncharacterized protein OS=Caenorhabditis elegans GN=CELE_Y9C9A.16 PE=4 SV=2 - [Q9N2S1_CAEEL]									44.51	5.26	2	2	2.4
Q9XUP2	CELE_T16G1.6	Uncharacterized protein OS=Caenorhabditis elegans GN=CELE_T16G1.6 PE=1 SV=2 - [Q9XUP2_CAEEL]									29.04	5.8	2	2	2.4
Q23100	CELE_W01B6.8	Uncharacterized protein OS=Caenorhabditis elegans GN=CELE_W01B6.8 PE=4 SV=2 - [Q23100_CAEEL]									21.24	5.12	1	2	2.4
Q19660	CELE_F21C10.10	Uncharacterized protein OS=Caenorhabditis elegans GN=CELE_F21C10.10 PE=1 SV=2 - [Q19660_CAEEL]									47.3368	13.27	2	2	2.4
Q21174	CELE_K03B4.1	Uncharacterized protein OS=Caenorhabditis elegans GN=CELE_K03B4.1 PE=1 SV=2 - [Q21174_CAEEL]									77.29	8.25	2	2	2.4
Q09517	let-767	Very-long-chain 3-oxooacyl-coA reductase let-767 OS=Caenorhabditis elegans GN=let-767 PE=1 SV=2 - [LE767_CAEEL]	69.8841	9.49	2	2	38.6	2.22	1	1	117.544	24.68	7	7	2.4
P90731	acly-2	ATP-citrate synthase OS=Caenorhabditis elegans GN=acly-2 PE=1 SV=1 - [P90731_CAEEL]	145.81	6.73	6	8	55.22	3.73	3	4	466.955	13.1	11	22	2.39
P53585	D1005.1	Probable ATP-citrate synthase OS=Caenorhabditis elegans GN=D1005.1 PE=3 SV=1 - [ACLY_CAEEL]	240.414	14.1	12	14	71.4422	5.33	4	5	771.496	23.33	20	33	2.39
O76577	rpn-11	26S proteasome non-ATPase regulatory subunit 14 OS=Caenorhabditis elegans GN=rpn-11 PE=1 SV=1 - [PSDE_CAEEL]	56.33	7.37	2	2					93.74	17.63	5	5	2.38
Q564W7	dao-5	Dauer or Aging adult Overexpression OS=Caenorhabditis elegans GN=dao-5 PE=1 SV=1 - [Q564W7_CAEEL]	32.411	1.44	1	2					59.92	5.75	4	5	2.38
P30627	glb-1	Globin-like protein OS=Caenorhabditis elegans GN=glb-1 PE=1 SV=2 - [GLBH_CAEEL]	58.39	13.21	2	2					124.17	13.21	2	5	2.38
Q18660	acs-17	Fatty Acid CoA Synthetase family OS=Caenorhabditis elegans GN=acs-17 PE=1 SV=2 - [Q18660_CAEEL]	104.22	3.76	2	2					129.79	8.22	4	5	2.38
Q95YF3	cgh-1	ATP-dependent RNA helicase cgh-1 OS=Caenorhabditis elegans GN=cgh-1 PE=1 SV=1 - [CGH1_CAEEL]	242.797	24.65	9	18	301.669	14.65	6	15	2100.15	56.51	22	58	2.37
O61792	rpn-8	Proteasome Regulatory Particle, Non-ATPase-like OS=Caenorhabditis elegans GN=rpn-8 PE=1 SV=1 - [O61792_CAEEL]	113.96	15.75	4	4					305.895	28.45	7	8	2.37
Q27GU1	csr-1	Chromosome-Segregation and RNAi deficient OS=Caenorhabditis elegans GN=csr-1 PE=1 SV=1 - [Q27GU1_CAEEL]	276.045	11.19	12	15	92.6733	3.46	3	3	774.938	22.84	20	30	2.34
C1P641	epi-1	Uncharacterized protein OS=Caenorhabditis elegans GN=epi-1 PE=1 SV=1 - [C1P641_CAEEL]	307.935	2.21	7	11	293.202	2.76	8	9	910.769	5.71	20	35	2.31
B5BM32	nxf-1	Nuclear eXport Factor OS=Caenorhabditis elegans GN=nxf-1 PE=1 SV=1 - [B5BM32_CAEEL]	61.1333	5.42	3	3	45.41	4.27	2	2	168.7	16.26	8	10	2.3
P90850	F26E4.3	Uncharacterized peptidase C1-like protein F26E4.3 OS=Caenorhabditis elegans GN=F26E4.3 PE=1 SV=3 - [YCF2E_CAEEL]	31.28	2.88	1	2	163.551	8.85	4	6	470.904	9.51	4	16	2.3
H1UBJ9	CELE_Y48C3A.14	DNA topoisomerase OS=Caenorhabditis elegans GN=CELE_Y48C3A.14 PE=1 SV=1 - [H1UBJ9_CAEEL]	132.846	6.21	4	4	314.841	12.89	9	12	809.993	27.96	21	30	2.29
Q9U299	xrn-2	5'-3' exoribonuclease 2 homolog OS=Caenorhabditis elegans GN=xrn-2 PE=1 SV=2 - [XRN2_CAEEL]	189.673	8.41	6	7	201.19	8.92	6	6	644.249	15.79	12	23	2.27
H2KYY3	pat-12	Paralysed Arrest at Two-fold OS=Caenorhabditis elegans GN=pat-12 PE=1 SV=1 - [H2KYY3_CAEEL]	171.469	10.61	5	7	120.15	10.28	5	6	540.203	33.5	17	23	2.27
Q22993	pmt-2	Phosphoethanolamine MethylTransferase OS=Caenorhabditis elegans GN=pmt-2 PE=1 SV=1 - [Q22993_CAEEL]	25.19	2.06	1	1	38.23	2.06	1	1	129.94	10.3	4	5	2.23
Q9U367	CELE_T16G1.9	Uncharacterized protein OS=Caenorhabditis elegans GN=CELE_T16G1.9 PE=1 SV=1 - [Q9U367_CAEEL]	28.08	1.27	1	1	24.72	1.16	1	1	70.45	3.92	4	5	2.23
Q9XXI9	mcm-2	DNA helicase OS=Caenorhabditis elegans GN=mcm-2 PE=1 SV=1 - [Q9XXI9_CAEEL]	61.94	3.86	3	3					124.19	8.97	6	6	2.22
Q19289	ifb-1	Intermediate filament protein ifb-1 OS=Caenorhabditis elegans GN=ifb-1 PE=1 SV=1 - [IFB1_CAEEL]	320.989	18.85	10	12	239.405	17.32	8	8	894.973	39.56	21	33	2.21
O17759	tkt-1	TransKeTolase homolog OS=Caenorhabditis elegans GN=tkt-1 PE=1 SV=1 - [O17759_CAEEL]	161.783	9.22	4	6	296.012	16.5	7	10	906.834	30.1	13	28	2.2
P17139	emb-9	Collagen alpha-1(IV) chain OS=Caenorhabditis elegans GN=emb-9 PE=1 SV=5 - [CO4A1_CAEEL]	54.34	1.53	2	2	62.6	0.68	2	2	231.595	1.25	3	8	2.18
Q86NJ8	ppw-1	Piwi-like protein OS=Caenorhabditis elegans GN=ppw-1 PE=1 SV=1 - [Q86NJ8_CAEEL]	149.337	8.12	6	6					240.74	9.92	8	10	2.17
Q9XWT3	CELE_Y62H9A.6	Uncharacterized protein OS=Caenorhabditis elegans GN=CELE_Y62H9A.6 PE=1 SV=1 - [Q9XWT3_CAEEL]	414.161	35.91	10	21	42.3668	10.5	3	3	1235.81	58.56	15	36	2.17
H2L2C9	atn-1	AcTiniN OS=Caenorhabditis elegans GN=atn-1 PE=1 SV=1 - [H2L2C9_CAEEL]	569.778	27.56	24	31	399.354	19.79	14	15	1845.53	50.06	42	71	2.17
P34335	C14B9.8	Probable phosphorylase b kinase regulatory subunit alpha OS=Caenorhabditis elegans GN=C14B9.8 PE=3 SV=3 - [KPBA_CAEEL]	29.2	0.9	1	1					60.64	3.18	3	3	2.14
Q21755	R05G6.4	Nitric oxide synthase-interacting protein homolog OS=Caenorhabditis elegans GN=R05G6.4 PE=3 SV=1 - [NOSIP_CAEEL]	41.48	3.87	1	1					66.85	8.06	2	3	2.14
O45293	gly-8	Probable N-acetylgalactosaminyltransferase 8 OS=Caenorhabditis elegans GN=gly-8 PE=1 SV=1 - [GALT8_CAEEL]	22.49	5.7	1	1					111.977	8.08	2	3	2.14
G5EEQ8	CELE_T08A11.2	Uncharacterized protein OS=Caenorhabditis elegans GN=CELE_T08A11.2 PE=1 SV=1 - [G5EEQ8_CAEEL]	36.64	0.68	1	1					88.4133	3.03	3	3	2.14
G5EDF7	sek-1	Dual specificity mitogen-activated protein kinase kinase sek-1 OS=Caenorhabditis elegans GN=sek-1 PE=1 SV=1 - [SEK1_CAEEL]	44.05	3.27	1	1					68.4271	8.63	3	3	2.14
G5EFX2	pkn-1	Protein Kinase N (PKN) homolog OS=Caenorhabditis elegans GN=pkn-1 PE=1 SV=1 - [G5EFX2_CAEEL]	50.28	0.99	1	1					60.05	2.47	3	3	2.14
Q19240	unc-115	Uncharacterized protein OS=Caenorhabditis elegans GN=unc-115 PE=1 SV=2 - [Q19240_CAEEL]	33.82	4	1	1					44.52	4.16	3	3	2.14
O61955	ife-3	Eukaryotic translation initiation factor 4E-3 OS=Caenorhabditis elegans GN=ife-3 PE=1 SV=2 - [IF4E3_CAEEL]	22.67	2.79	1	1					38.091	10.76	3	3	2.14
Q19642	czw-1	Caenorhabditis Zeste White 10 (Drosophila) homolog OS=Caenorhabditis elegans GN=czw-1 PE=1 SV=1 - [Q19642_CAEEL]	27.42	1.29	1	1		0			44.93	4.63	3	3	2.14
W6RY26	xpo-3	EXPOrtin (Nuclear export receptor) OS=Caenorhabditis elegans GN=xpo-3 PE=1 SV=1 - [W6RY26_CAEEL]	39.11	1.6	1	1		0			39.7118	4.8	3	3	2.14
O16457	CELE_F41E6.5	Uncharacterized protein OS=Caenorhabditis elegans GN=CELE_F41E6.5 PE=1 SV=2 - [O16457_CAEEL]	23.66	4.06	1	1					82.0567	15.63	3	3	2.14
Q9TZQ3	pgl-1	P granule abnormality protein 1 OS=Caenorhabditis elegans GN=pgl-1 PE=1 SV=1 - [PGL1_CAEEL]	44.88	5.21	4	4		0			101.594	7.95	6	7	2.12
P34384	F02A9.4	Uncharacterized protein F02A9.4b OS=Caenorhabditis elegans GN=F02A9.4 PE=4 SV=3 - [YLPD_CAEEL]	98.37	15.23	4	4					162.397	26.4	7	7	2.12
P53489	arx-2	Actin-related protein 2 OS=Caenorhabditis elegans GN=arx-2 PE=3 SV=1 - [ARP2_CAEEL]	139.18	12.41	3	3	156.21	8.1	2	2	375.31	25.32	7	9	2.1
Q19211	CELE_F08G12.2	Uncharacterized protein OS=Caenorhabditis elegans GN=CELE_F08G12.2 PE=1 SV=2 - [Q19211_CAEEL]					61.54	11.78	2	2	295.18	21.45	4	5	2.1
G8JY38	vit-2	VITellogenin structural genes (Yolk protein genes) OS=Caenorhabditis elegans GN=vit-2 PE=1 SV=1 - [G8JY38_CAEEL]	4357.13	46.28	70	204	320.566	8.99	17	25	7945.19	57.89	95	317	2.1
Q9GZE9	ldp-1	Lipid DroPlet localized protein OS=Caenorhabditis elegans GN=ldp-1 PE=1 SV=1 - [Q9GZE9_CAEEL]	160.33	9.62	4	4	131.263	7.51	3	3	502.495	21.83	7	12	2.09
P34388	mrps-9	Probable 40S ribosomal protein S9, mitochondrial OS=Caenorhabditis elegans GN=mrps-9 PE=3 SV=2 - [RT09_CAEEL]	34.18	3.83	1	2					56.7033	8.16	3	4	2.01
G4RYA5	CELE_F38A1.8	Uncharacterized protein OS=Caenorhabditis elegans GN=CELE_F38A1.8 PE=1 SV=1 - [G4RYA5_CAEEL]	42.82	3.2	2	2					44.6712	3.2	2	4	2.01
Q9XWT5	CELE_Y62H9A.3	Uncharacterized protein OS=Caenorhabditis elegans GN=CELE_Y62H9A.3 PE=1 SV=1 - [Q9XWT5_CAEEL]	66.76	7.48	2	2					180.79	25.23	4	4	2.01
O44565	lam-1	LAMinin related. See also lmb OS=Caenorhabditis elegans GN=lam-1 PE=1 SV=3 - [O44565_CAEEL]	47	1.51	2	3	39.11	1.51	2	3	177.362	3.46	6	10	1.98
Q19986	CELE_F33G12.2	Uncharacterized protein OS=Caenorhabditis elegans GN=CELE_F33G12.2 PE=1 SV=2 - [Q19986_CAEEL]		0			68.87	9.18	1	1	292.387	11.15	2	3	1.98
Q8MNT7	CELE_F09F7.4	Uncharacterized protein OS=Caenorhabditis elegans GN=CELE_F09F7.4 PE=1 SV=1 - [Q8MNT7_CAEEL]					24.9	2.48	1	1	134.413	17.36	3	3	1.98
Q7Z145	CELE_ZK418.9	Uncharacterized protein OS=Caenorhabditis elegans GN=CELE_ZK418.9 PE=1 SV=1 - [Q7Z145_CAEEL]					25.22	2.75	1	1	91.0086	5.88	3	3	1.98
O01498	stam-1	Signal transducing adapter molecule 1 OS=Caenorhabditis elegans GN=stam-1 PE=1 SV=2 - [STAM1_CAEEL]					49.19	2.63	1	1	122.903	8.97	3	3	1.98
A0A061AJ76	CELE_Y45F10A.3	Uncharacterized protein OS=Caenorhabditis elegans GN=CELE_Y45F10A.3 PE=1 SV=1 - [A0A061AJ76_CAEEL]					46.37	8.29	1	1	151.923	20.74	3	3	1.98
Q9BL93	CELE_Y18H1A.2	Uncharacterized protein OS=Caenorhabditis elegans GN=CELE_Y18H1A.2 PE=1 SV=1 - [Q9BL93_CAEEL]					28.21	8.15	1	1	152.15	20.74	3	3	1.98
Q10663	icl-1	Bifunctional glyoxylate cycle protein OS=Caenorhabditis elegans GN=icl-1 PE=1 SV=2 - [GCP_CAEEL]	1364.97	33.99	31	60	734.069	27.69	25	36	3548.66	61.88	55	135	1.98
Q17693	mthf-1	Probable methylenetetrahydrofolate reductase OS=Caenorhabditis elegans GN=mthf-1 PE=3 SV=2 - [MTHR_CAEEL]	72.67	8.45	3	4	32.6	2.41	1	1	196.695	14.93	7	8	1.97
P48166	rpl-41	60S ribosomal protein L44 OS=Caenorhabditis elegans GN=rpl-41 PE=3 SV=2 - [RL44_CAEEL]	91.28	13.33	2	2	108.54	12.38	1	2	349.44	14.29	4	7	1.95
P34604	ZK1098.4	Probable translation initiation factor eIF-2B subunit alpha OS=Caenorhabditis elegans GN=ZK1098.4 PE=1 SV=1 - [EI2BA_CAEEL]	61.32	6.89	2	2	53.64	7.87	2	2	217.066	25.25	6	7	1.95
O45394	CELE_F22B8.7	Uncharacterized protein OS=Caenorhabditis elegans GN=CELE_F22B8.7 PE=1 SV=2 - [O45394_CAEEL]	86.36	6.78	2	2	66.78	6.49	2	2	254.817	26.55	7	7	1.95
O17919	K01G5.5	Putative H/ACA ribonucleoprotein complex subunit 4 OS=Caenorhabditis elegans GN=K01G5.5 PE=3 SV=1 - [DKC1_CAEEL]	3671.63	75.73	37	146	2729.2	50.11	24	107	10604.7	81.8	48	352	1.95
Q09250	C16C10.4	Probable histone deacetylase complex subunit SAP18 OS=Caenorhabditis elegans GN=C16C10.4 PE=3 SV=1 - [SAP18_CAEEL]	228.226	13.25	4	6	219.859	19.28	5	9	703.851	51.81	10	23	1.94
H2KYY9	pat-12	Paralysed Arrest at Two-fold OS=Caenorhabditis elegans GN=pat-12 PE=1 SV=1 - [H2KYY9_CAEEL]	171.469	14.32	5	7	145.651	16.11	6	7	521.957	37.14	15	21	1.94
G5EBI0	4D656	4D656 OS=Caenorhabditis elegans GN=4D656 PE=1 SV=1 - [G5EBI0_CAEEL]	167.093	7.98	1	3		0			245	14.08	2	5	1.92
Q9U3Q0	mrps-22	Mitochondrial Ribosomal Protein, Small OS=Caenorhabditis elegans GN=mrps-22 PE=1 SV=1 - [Q9U3Q0_CAEEL]	97.0233	6.22	2	3					145.65	14.35	5	5	1.92
P55155	vit-1	Vitellogenin-1 OS=Caenorhabditis elegans GN=vit-1 PE=1 SV=2 - [VIT1_CAEEL]	3153.13	30.26	51	151	255.601	7.18	14	22	5453.13	37.56	67	221	1.92
Q9N4J2	vit-3	Vitellogenin-3 OS=Caenorhabditis elegans GN=vit-3 PE=1 SV=1 - [VIT3_CAEEL]	1917.98	22.46	37	106	216.41	6.11	9	12	3078.98	29.38	52	150	1.92
P90897	rde-12	DEAD-box ATP-dependent RNA helicase rde-12 OS=Caenorhabditis elegans GN=rde-12 PE=1 SV=4 - [RDE12_CAEEL]	642.846	20.23	16	30	861.125	20.96	20	29	2730.86	43.8	35	83	1.91
Q93934	CELE_R07H5.8	Uncharacterized protein OS=Caenorhabditis elegans GN=CELE_R07H5.8 PE=1 SV=1 - [Q93934_CAEEL]	104.933	18.13	3	3	52.27	13.16	2	2	315.7	25.73	6	8	1.9
G5EDE4	CELE_W08E3.2	Uncharacterized protein OS=Caenorhabditis elegans GN=CELE_W08E3.2 PE=1 SV=1 - [G5EDE4_CAEEL]	116.85	7.19	3	5	174.63	7.19	3	5	432.123	13.36	6	15	1.89
G5ECS9	cpt-2	Carnitine Palmitoyl Transferase OS=Caenorhabditis elegans GN=cpt-2 PE=1 SV=2 - [G5ECS9_CAEEL]	35.55	2.48	1	1	57.53	1.86	1	1	130.76	7.43	4	4	1.88
Q9XVX5	vps-29	Vacuolar protein sorting-associated protein 29 OS=Caenorhabditis elegans GN=vps-29 PE=1 SV=2 - [Q9XVX5_CAEEL]	40.18	8.56	1	1	69.65	8.56	1	1	85.88	21.39	4	4	1.88
Q86G92	CELE_T04A8.7	Uncharacterized protein OS=Caenorhabditis elegans GN=CELE_T04A8.7 PE=1 SV=1 - [Q86G92_CAEEL]	64.06	2.31	1	1	51.61	1.82	1	1	125.38	6.11	3	4	1.88
Q7JLJ0	CELE_F32D8.12	Uncharacterized protein OS=Caenorhabditis elegans GN=CELE_F32D8.12 PE=1 SV=1 - [Q7JLJ0_CAEEL]	26.29	5.87	1	1	60.65	2.83	1	1	158.165	13.91	4	4	1.88
O62515	ZK550.6	Probable phytanoyl-CoA dioxygenase OS=Caenorhabditis elegans GN=ZK550.6 PE=3 SV=2 - [PAHX_CAEEL]	32.3	6.73	1	1	23.77	6.73	1	1	123.58	16.67	3	4	1.88
Q86DC6	ifd-1	Intermediate filament protein ifd-1 OS=Caenorhabditis elegans GN=ifd-1 PE=3 SV=2 - [IFD1_CAEEL]	46.02	1.74	1	1	66.39	4.52	3	3	167.417	9.22	5	7	1.87
A5JYX4	dhs-3	DeHydrogenases, Short chain OS=Caenorhabditis elegans GN=dhs-3 PE=1 SV=1 - [A5JYX4_CAEEL]	50.75	4.56	1	1	51.87	9.45	3	3	226.42	25.08	6	7	1.87
Q9U3L5	C47B2.2	Uncharacterized protein OS=Caenorhabditis elegans GN=C47B2.2 PE=1 SV=1 - [Q9U3L5_CAEEL]	82.51	6.93	1	1	177.837	21.21	3	3	231.833	25.97	5	7	1.87
Q22020	CELE_R53.5	Uncharacterized protein OS=Caenorhabditis elegans GN=CELE_R53.5 PE=1 SV=1 - [Q22020_CAEEL]	109.957	16.89	3	3	156.309	30.14	7	8	346.757	37.9	10	17	1.87
V6CIS4	hecd-1	HECtD1 ubiquitin ligase homolog OS=Caenorhabditis elegans GN=hecd-1 PE=1 SV=1 - [V6CIS4_CAEEL]	126.34	1.65	4	4		0			168.48	2.03	5	6	1.87
Q6LD30	unc-87	Unc-87 protein OS=Caenorhabditis elegans GN=unc-87 PE=4 SV=1 - [Q6LD30_CAEEL]	656.433	37.54	12	17	297.719	19.05	6	9	1274.12	59.1	20	35	1.86
Q27493	rpoa-2	DNA-directed RNA polymerase OS=Caenorhabditis elegans GN=rpoa-2 PE=1 SV=1 - [Q27493_CAEEL]	34.37	1.6	2	2	33.4442	2.13	3	3	180.073	8.87	8	8	1.83
P91321	CELE_F53E10.1	Uncharacterized protein OS=Caenorhabditis elegans GN=CELE_F53E10.1 PE=1 SV=1 - [P91321_CAEEL]	89.5	10.03	2	2	81.0667	15.63	3	3	246.695	21.24	5	8	1.83
P91905	ryr-1	Ryanodine receptor OS=Caenorhabditis elegans GN=ryr-1 PE=4 SV=1 - [P91905_CAEEL]	51.17	0.59	2	2	40.93	0.2	1	1	67.91	0.73	4	5	1.83
P49196	rps-12	40S ribosomal protein S12 OS=Caenorhabditis elegans GN=rps-12 PE=3 SV=2 - [RS12_CAEEL]	99.39	7.86	2	2	50.17	7.86	1	1	162.36	45.71	5	5	1.83
G5EC98	ctps-1	CTP synthase OS=Caenorhabditis elegans GN=ctps-1 PE=1 SV=1 - [G5EC98_CAEEL]	61.76	3.87	2	2	41.57	1.49	1	1	149.88	9.82	5	5	1.83
O44781	CELE_F33D11.10	Uncharacterized protein OS=Caenorhabditis elegans GN=CELE_F33D11.10 PE=3 SV=1 - [O44781_CAEEL]	455.396	36.84	14	19	220.754	15.29	6	8	1150.39	48.62	18	35	1.82
P06125	vit-5	Vitellogenin-5 OS=Caenorhabditis elegans GN=vit-5 PE=2 SV=2 - [VIT5_CAEEL]	2784.49	29.2	50	143	242.939	7.74	12	16	4362.85	36.06	64	190	1.81
P46562	alh-9	Putative aldehyde dehydrogenase family 7 member A1 homolog OS=Caenorhabditis elegans GN=alh-9 PE=3 SV=2 - [AL7A1_CAEEL]	45.43	5.84	3	3	48.18	1.69	1	1	99.62	9.42	5	6	1.79
O16297	mcm-7	DNA helicase OS=Caenorhabditis elegans GN=mcm-7 PE=1 SV=1 - [O16297_CAEEL]	145.65	10.27	6	6		0			204.089	13.15	8	8	1.79
Q20697	CELE_F53B1.4	Uncharacterized protein OS=Caenorhabditis elegans GN=CELE_F53B1.4 PE=1 SV=1 - [Q20697_CAEEL]	115.833	23.1	6	6					266.96	34.5	7	8	1.79
Q21284	CELE_K07E3.4	Uncharacterized protein OS=Caenorhabditis elegans GN=CELE_K07E3.4 PE=1 SV=2 - [Q21284_CAEEL]		0			41.55	3.75	2	2	147.04	7.19	4	4	1.78
P19974	cyc-2.1	Cytochrome c 2.1 OS=Caenorhabditis elegans GN=cyc-2.1 PE=1 SV=2 - [CYC21_CAEEL]					49.56	9.91	1	2	100.323	16.22	2	4	1.78
O45110	mrpl-2	Mitochondrial Ribosomal Protein, Large OS=Caenorhabditis elegans GN=mrpl-2 PE=1 SV=3 - [O45110_CAEEL]					52.57	5.92	2	2	116.112	14.33	4	4	1.78
Q8I711	gars-1	Glycyl Amino-acyl tRNA Synthetase OS=Caenorhabditis elegans GN=gars-1 PE=1 SV=1 - [Q8I711_CAEEL]					34.93	2.8	2	2	91.04	6.64	4	4	1.78
O16999	W03F9.1	Zinc finger protein ZPR1 homolog OS=Caenorhabditis elegans GN=W03F9.1 PE=3 SV=2 - [ZPR1_CAEEL]					57.24	5.27	2	2	116.27	7.91	3	4	1.78
Q9TYJ7	dpm-1	Dolichol Phosphate Mannosyltransferase OS=Caenorhabditis elegans GN=dpm-1 PE=1 SV=2 - [Q9TYJ7_CAEEL]					44.92	12.97	2	2	121.43	29.29	4	4	1.78
Q09657	CELE_ZK1320.9	Uncharacterized protein OS=Caenorhabditis elegans GN=CELE_ZK1320.9 PE=1 SV=1 - [Q09657_CAEEL]	47.91	3.18	1	1	125.75	8.47	3	4	208.927	20.97	7	8	1.77
G5EDW8	VF13D12L.3	Uncharacterized protein OS=Caenorhabditis elegans GN=VF13D12L.3 PE=1 SV=1 - [G5EDW8_CAEEL]	79.96	12.25	4	4	49.92	5.25	1	1	227.49	33.5	6	7	1.76
G5ECG8	vab-10	Uncharacterized protein OS=Caenorhabditis elegans GN=vab-10 PE=1 SV=1 - [G5ECG8_CAEEL]	1487.29	10.92	33	62	694.995	9.72	30	36	2594.31	21.43	65	122	1.76
Q95XQ8	mcm-4	Yeast MCM (Licensing factor) related OS=Caenorhabditis elegans GN=mcm-4 PE=1 SV=1 - [Q95XQ8_CAEEL]	99.03	6.68	5	5	23.12	0.97	1	1	116.727	9.72	8	8	1.74
G5ECP9	vab-10	Uncharacterized protein OS=Caenorhabditis elegans GN=vab-10 PE=1 SV=1 - [G5ECP9_CAEEL]	1522.93	10.92	34	64	715.649	9.75	31	37	2660.76	20.85	65	124	1.73
H2KYB9	grld-1	Glutamate Receptor Level Decreased OS=Caenorhabditis elegans GN=grld-1 PE=1 SV=1 - [H2KYB9_CAEEL]	41.25	2.21	2	2	86.0423	4.43	2	2	140.936	12.07	6	6	1.72
Q9BL86	mrpl-38	Mitochondrial Ribosomal Protein, Large OS=Caenorhabditis elegans GN=mrpl-38 PE=1 SV=1 - [Q9BL86_CAEEL]	96.4	5.33	2	2	84.79	5.33	2	2	135.653	8.23	3	6	1.72
C7FZU4	nid-1	NIDogen (Basement membrane protein) OS=Caenorhabditis elegans GN=nid-1 PE=1 SV=1 - [C7FZU4_CAEEL]	157.588	4.33	5	6	189.474	6.81	6	6	367.147	11.3	11	16	1.72
Q9N358	cct-8	T-complex protein 1 subunit theta OS=Caenorhabditis elegans GN=cct-8 PE=1 SV=3 - [TCPQ_CAEEL]	353.667	19.16	9	14	188.955	12.23	6	7	690.405	36.31	17	26	1.71
Q23188	ret-1	Reticulon-like protein OS=Caenorhabditis elegans GN=ret-1 PE=1 SV=1 - [Q23188_CAEEL]	82.5067	19.37	3	3	62.29	6.31	1	2	189.956	19.37	3	7	1.7
Q17336	let-858	Pre-mRNA-splicing factor CWC22 homolog OS=Caenorhabditis elegans GN=let-858 PE=2 SV=1 - [CWC22_CAEEL]	244.593	13.94	10	14	138.034	12.15	9	10	944.83	19.73	15	30	1.7
Q95XZ0	cogc-4	Conserved oligomeric Golgi complex subunit 4 OS=Caenorhabditis elegans GN=cogc-4 PE=3 SV=1 - [COG4_CAEEL]		0							36.65	1.5	1	1	1.7
O76840	mig-6	Papilin OS=Caenorhabditis elegans GN=mig-6 PE=1 SV=1 - [PPN1_CAEEL]		0							35.96	0.51	1	1	1.7
P34652	cnx-1	Calnexin OS=Caenorhabditis elegans GN=cnx-1 PE=1 SV=1 - [CALX_CAEEL]		0				0			34.66	1.13	1	1	1.7
P54815	mspn-1	Mitochondrial sorting homolog OS=Caenorhabditis elegans GN=mspn-1 PE=3 SV=2 - [MSP1_CAEEL]		0							28.96	3.51	1	1	1.7
G5EFM9	nekl-3	Serine/threonine-protein kinase nekl-3 OS=Caenorhabditis elegans GN=nekl-3 PE=1 SV=1 - [NEKL3_CAEEL]		0							36.91	2.65	1	1	1.7
Q18406	sec-10	Exocyst complex component 5 OS=Caenorhabditis elegans GN=sec-10 PE=3 SV=1 - [EXOC5_CAEEL]		0				0			46.01	1.37	1	1	1.7
P55853	smo-1	Small ubiquitin-related modifier OS=Caenorhabditis elegans GN=smo-1 PE=1 SV=1 - [SUMO_CAEEL]		0							0	6.59	1	1	1.7
G5EFP3	mrp-4	Uncharacterized protein OS=Caenorhabditis elegans GN=mrp-4 PE=1 SV=1 - [G5EFP3_CAEEL]		0							34.37	0.57	1	1	1.7
Q1ZXU8	acl-5	ACyLtransferase-like OS=Caenorhabditis elegans GN=acl-5 PE=1 SV=1 - [Q1ZXU8_CAEEL]		0				0			68.08	3.08	1	1	1.7
Q18033	thoc-2	THO Complex (Transcription factor/nuclear export) subunit OS=Caenorhabditis elegans GN=thoc-2 PE=1 SV=4 - [Q18033_CAEEL]		0				0			20.19	0.77	1	1	1.7
O01615	T19H12.2	Acidic leucine-rich nuclear phosphoprotein 32-related protein 2 OS=Caenorhabditis elegans GN=T19H12.2 PE=3 SV=1 - [AN322_CAEEL]		0				0			34.86	3.11	1	1	1.7
O61208	gip-1	Gamma-tubulin Interacting Protein OS=Caenorhabditis elegans GN=gip-1 PE=1 SV=2 - [O61208_CAEEL]		0							22.71	0.79	1	1	1.7
G5EE73	CELE_Y37A1B.17	Uncharacterized protein OS=Caenorhabditis elegans GN=CELE_Y37A1B.17 PE=1 SV=1 - [G5EE73_CAEEL]		0							27.03	0.94	1	1	1.7
Q86DA0	CELE_Y43F4B.5	Uncharacterized protein OS=Caenorhabditis elegans GN=CELE_Y43F4B.5 PE=1 SV=1 - [Q86DA0_CAEEL]		0				0			35.55	1.96	1	1	1.7
Q9U2K8	abce-1	ABC transporter, class E OS=Caenorhabditis elegans GN=abce-1 PE=1 SV=1 - [Q9U2K8_CAEEL]		0							45.07	1.97	1	1	1.7
Q93382	C46F11.4	Uncharacterized protein OS=Caenorhabditis elegans GN=C46F11.4 PE=1 SV=2 - [Q93382_CAEEL]		0				0			43.23	1.48	1	1	1.7
O76384	mms-19	Yeast MMS related OS=Caenorhabditis elegans GN=mms-19 PE=1 SV=2 - [O76384_CAEEL]		0				0			41.8	1.63	1	1	1.7
Q18965	eat-3	Uncharacterized protein OS=Caenorhabditis elegans GN=eat-3 PE=1 SV=3 - [Q18965_CAEEL]		0				0			29.39	1.14	1	1	1.7
O17397	F52H2.6	Diminuto-like protein OS=Caenorhabditis elegans GN=F52H2.6 PE=3 SV=1 - [DIML_CAEEL]		0							34.82	2.67	1	1	1.7
Q7K742	ddl-3	Daf-16-Dependent Longevity (WT but not daf-16 lifespan increased) OS=Caenorhabditis elegans GN=ddl-3 PE=1 SV=1 - [Q7K742_CAEEL]		0							35.09	3.04	1	1	1.7
Q8MNV5	C18C4.5	Uncharacterized protein OS=Caenorhabditis elegans GN=C18C4.5 PE=1 SV=1 - [Q8MNV5_CAEEL]		0				0			19.51	1.17	1	1	1.7
O61198	CELE_F15E6.6	Uncharacterized protein OS=Caenorhabditis elegans GN=CELE_F15E6.6 PE=1 SV=3 - [O61198_CAEEL]		0				0			32.94	0.8	1	1	1.7
Q22554	CELE_T19A5.1	Uncharacterized protein OS=Caenorhabditis elegans GN=CELE_T19A5.1 PE=1 SV=1 - [Q22554_CAEEL]		0							43.09	0.78	1	1	1.7
O01477	C06A5.6	Uncharacterized protein OS=Caenorhabditis elegans GN=C06A5.6 PE=1 SV=1 - [O01477_CAEEL]		0							31.93	1.16	1	1	1.7
Q9BKS2	CELE_Y82E9BR.14	Uncharacterized protein OS=Caenorhabditis elegans GN=CELE_Y82E9BR.14 PE=1 SV=1 - [Q9BKS2_CAEEL]		0							86.82	6.93	1	1	1.7
P34511	vms-1	Protein vms-1 OS=Caenorhabditis elegans GN=vms-1 PE=2 SV=2 - [VMS1_CAEEL]						0			39.47	1.13	1	1	1.7
D9PTP5	snx-6	Sorting NeXin OS=Caenorhabditis elegans GN=snx-6 PE=1 SV=1 - [D9PTP5_CAEEL]						0			33.7	3.35	1	1	1.7
G5EFJ0	klp-12	Kinesin-like protein OS=Caenorhabditis elegans GN=klp-12 PE=1 SV=1 - [G5EFJ0_CAEEL]						0			40.49	0.76	1	1	1.7
G5EFJ4	capg-1	CAP-G condensin subunit OS=Caenorhabditis elegans GN=capg-1 PE=1 SV=1 - [G5EFJ4_CAEEL]						0			22.83	1.3	1	1	1.7
Q8WQA7	ekl-4	Uncharacterized protein OS=Caenorhabditis elegans GN=ekl-4 PE=1 SV=1 - [Q8WQA7_CAEEL]						0			32.73	2.06	1	1	1.7
Q9TYY0	CELE_M57.2	Uncharacterized protein OS=Caenorhabditis elegans GN=CELE_M57.2 PE=1 SV=1 - [Q9TYY0_CAEEL]						0			40.35	1.9	1	1	1.7
Q9N5V9	C51G7.5	Putative uncharacterized protein C51G7.5 OS=Caenorhabditis elegans GN=C51G7.5 PE=4 SV=2 - [Q9N5V9_CAEEL]						0			32.23	3.96	1	1	1.7
Q21809	CELE_R07E3.4	Uncharacterized protein OS=Caenorhabditis elegans GN=CELE_R07E3.4 PE=3 SV=1 - [Q21809_CAEEL]						0			25.12	2.35	1	1	1.7
Q95QT2	C29E4.10	Putative galactocerebrosidase OS=Caenorhabditis elegans GN=C29E4.10 PE=3 SV=3 - [GALC_CAEEL]									29.07	1.4	1	1	1.7
P34617	ZK1236.1	Translation factor GUF1 homolog, mitochondrial OS=Caenorhabditis elegans GN=ZK1236.1 PE=3 SV=2 - [GUF1_CAEEL]									0	0.93	1	1	1.7
Q17574	tag-165	Putative methionine synthase reductase OS=Caenorhabditis elegans GN=tag-165 PE=3 SV=1 - [MTRR_CAEEL]									25.64	1.03	1	1	1.7
P90829	F10C2.4	DNA polymerase delta catalytic subunit OS=Caenorhabditis elegans GN=F10C2.4 PE=3 SV=1 - [DPOD1_CAEEL]									43.11	1.11	1	1	1.7
Q17449	faah-1	Fatty acid amide hydrolase 1 OS=Caenorhabditis elegans GN=faah-1 PE=2 SV=1 - [FAAH1_CAEEL]									33.41	1.22	1	1	1.7
O01991	efk-1	Eukaryotic elongation factor 2 kinase OS=Caenorhabditis elegans GN=efk-1 PE=2 SV=1 - [EF2K_CAEEL]									33.75	1.69	1	1	1.7
Q95XX1	Y54G2A.17	Nicotinate phosphoribosyltransferase OS=Caenorhabditis elegans GN=Y54G2A.17 PE=3 SV=3 - [PNCB_CAEEL]									31.53	2.67	1	1	1.7
Q17750	ufl-1	E3 UFM1-protein ligase 1 homolog OS=Caenorhabditis elegans GN=ufl-1 PE=3 SV=1 - [UFL1_CAEEL]									35.6	1.5	1	1	1.7
Q93169	C01G10.9	Methylthioribose-1-phosphate isomerase OS=Caenorhabditis elegans GN=C01G10.9 PE=3 SV=1 - [MTNA_CAEEL]									20.06	3.83	1	1	1.7
Q967F4	hmr-1	Cadherin-related hmr-1 OS=Caenorhabditis elegans GN=hmr-1 PE=1 SV=1 - [HMR1_CAEEL]									51.37	0.38	1	1	1.7
O45503	mtx-1	Metaxin-1 homolog OS=Caenorhabditis elegans GN=mtx-1 PE=1 SV=1 - [MTX1_CAEEL]									20.67	2.24	1	1	1.7
P90980	pkc-2	Protein kinase C-like 2 OS=Caenorhabditis elegans GN=pkc-2 PE=2 SV=2 - [KPC2_CAEEL]									42.14	1.76	1	1	1.7
Q8T3C8	mtp-18	Mitochondrial fission process protein 1 OS=Caenorhabditis elegans GN=mtp-18 PE=3 SV=2 - [MTFP1_CAEEL]									39.05	7.83	1	1	1.7
Q11182	vps-16	Vacuolar protein sorting-associated protein 16 homolog OS=Caenorhabditis elegans GN=vps-16 PE=3 SV=2 - [VPS16_CAEEL]									39.96	1.06	1	1	1.7
P34808	mei-1	Meiotic spindle formation protein mei-1 OS=Caenorhabditis elegans GN=mei-1 PE=1 SV=1 - [KTNA1_CAEEL]									22.66	2.33	1	1	1.7
P34567	T16H12.4	General transcription factor IIH subunit 2 OS=Caenorhabditis elegans GN=T16H12.4 PE=3 SV=3 - [TF2H2_CAEEL]									47.65	3.99	1	1	1.7
Q21557	dlc-2	Probable dynein light chain 2, cytoplasmic OS=Caenorhabditis elegans GN=dlc-2 PE=3 SV=2 - [DYL2_CAEEL]									46.89	14.44	1	1	1.7
Q8MXQ7	Y92H12BL.1	Threonylcarbamoyladenosine tRNA methylthiotransferase OS=Caenorhabditis elegans GN=Y92H12BL.1 PE=3 SV=2 - [CDKAL_CAEEL]									22.38	2.59	1	1	1.7
Q03606	T23G5.2	CRAL-TRIO domain-containing protein T23G5.2 OS=Caenorhabditis elegans GN=T23G5.2 PE=3 SV=3 - [YN02_CAEEL]									31.27	1.53	1	1	1.7
Q9XTG7	akt-2	Serine/threonine-protein kinase akt-2 OS=Caenorhabditis elegans GN=akt-2 PE=1 SV=1 - [AKT2_CAEEL]									20.33	1.52	1	1	1.7
Q20678	sec-3	Exocyst complex component 1 OS=Caenorhabditis elegans GN=sec-3 PE=3 SV=2 - [EXOC1_CAEEL]									27.54	1.06	1	1	1.7
Q27371	mup-2	Troponin T OS=Caenorhabditis elegans GN=mup-2 PE=2 SV=1 - [TNNT_CAEEL]									46.74	3.46	1	1	1.7
P02513	hsp-16.48	Heat shock protein Hsp-16.48/Hsp-16.49 OS=Caenorhabditis elegans GN=hsp-16.48 PE=2 SV=1 - [HSP17_CAEEL]									30.52	9.79	1	1	1.7
O16259	sti-1	Stress-induced-phosphoprotein 1 OS=Caenorhabditis elegans GN=sti-1 PE=1 SV=1 - [STIP1_CAEEL]									42.03	5	1	1	1.7
Q95NU5	ooc-5	Torsin-like protein OS=Caenorhabditis elegans GN=ooc-5 PE=1 SV=1 - [TORS_CAEEL]									33.03	2.53	1	1	1.7
Q19013	glna-2	Putative glutaminase 2 OS=Caenorhabditis elegans GN=glna-2 PE=3 SV=2 - [GLS2_CAEEL]									35.84	2.15	1	1	1.7
P34542	R05D3.9/R05D3.10	Uncharacterized protein R05D3.9 OS=Caenorhabditis elegans GN=R05D3.9/R05D3.10 PE=3 SV=3 - [YNC9_CAEEL]									31.97	2.17	1	1	1.7
Q93618	F27D4.4	Zinc finger CCCH domain-containing protein 15 homolog OS=Caenorhabditis elegans GN=F27D4.4 PE=3 SV=3 - [ZC3HF_CAEEL]									22.06	2.14	1	1	1.7
Q09424	R07G3.7	Uncharacterized protein R07G3.7 OS=Caenorhabditis elegans GN=R07G3.7 PE=4 SV=2 - [YRO7_CAEEL]									26.98	1.91	1	1	1.7
P54936	lin-2	Protein lin-2 OS=Caenorhabditis elegans GN=lin-2 PE=1 SV=1 - [LIN2_CAEEL]									21.99	1.04	1	1	1.7
P91478	mrrf-1	Ribosome-recycling factor, mitochondrial OS=Caenorhabditis elegans GN=mrrf-1 PE=3 SV=2 - [RRFM_CAEEL]									32.38	3.36	1	1	1.7
Q9N361	mrps-25	Probable 28S ribosomal protein S25, mitochondrial OS=Caenorhabditis elegans GN=mrps-25 PE=3 SV=1 - [RT25_CAEEL]									20.91	5.29	1	1	1.7
Q9NAA5	Y53F4B.13	Cap-specific mRNA (nucleoside-2'-O-)-methyltransferase 1 OS=Caenorhabditis elegans GN=Y53F4B.13 PE=3 SV=3 - [MTR1_CAEEL]									35.77	1.2	1	1	1.7
G5EC65	abts-1	Anion exchange protein OS=Caenorhabditis elegans GN=abts-1 PE=1 SV=1 - [G5EC65_CAEEL]									0	0.54	1	1	1.7
P30640	R08D7.1	BUD13 homolog OS=Caenorhabditis elegans GN=R08D7.1 PE=3 SV=1 - [BUD13_CAEEL]									33.8	2.18	1	1	1.7
Q23091	CELE_ZK742.4	Uncharacterized protein OS=Caenorhabditis elegans GN=CELE_ZK742.4 PE=1 SV=1 - [Q23091_CAEEL]									53.9	2.92	1	1	1.7
Q9N4G8	yop-1	Receptor expression-enhancing protein OS=Caenorhabditis elegans GN=yop-1 PE=1 SV=1 - [Q9N4G8_CAEEL]									76.37	7.65	1	1	1.7
Q95ZR2	CELE_R05D11.9	Uncharacterized protein OS=Caenorhabditis elegans GN=CELE_R05D11.9 PE=1 SV=2 - [Q95ZR2_CAEEL]									37.95	1.09	1	1	1.7
O17003	natc-1	N-alpha-AcetylTransferase C complex subunit OS=Caenorhabditis elegans GN=natc-1 PE=1 SV=2 - [O17003_CAEEL]									23.05	1.13	1	1	1.7
Q9N415	rimb-1	RIM Binding protein OS=Caenorhabditis elegans GN=rimb-1 PE=1 SV=3 - [Q9N415_CAEEL]									54.05	1.18	1	1	1.7
Q9U241	CELE_Y56A3A.19	Acyl carrier protein OS=Caenorhabditis elegans GN=CELE_Y56A3A.19 PE=1 SV=1 - [Q9U241_CAEEL]									25.69	10.53	1	1	1.7
P91821	set-18	SET (Trithorax/polycomb) domain containing OS=Caenorhabditis elegans GN=set-18 PE=1 SV=1 - [P91821_CAEEL]									23.23	2.79	1	1	1.7
Q9XWP7	eif-3.j	Eukaryotic Initiation Factor OS=Caenorhabditis elegans GN=eif-3.j PE=1 SV=1 - [Q9XWP7_CAEEL]									35.78	5.66	1	1	1.7
P34325	cyk-7	Cytokinesis defective protein 7 OS=Caenorhabditis elegans GN=cyk-7 PE=4 SV=2 - [CYK7_CAEEL]									39.65	5.99	1	1	1.7
O45097	CELE_F57H12.6	Uncharacterized protein OS=Caenorhabditis elegans GN=CELE_F57H12.6 PE=1 SV=2 - [O45097_CAEEL]									22.07	3.9	1	1	1.7
Q9U1S8	CELE_Y6D1A.1	Uncharacterized protein OS=Caenorhabditis elegans GN=CELE_Y6D1A.1 PE=1 SV=2 - [Q9U1S8_CAEEL]									26.58	1.86	1	1	1.7
G5EEW3	msp-74	Major Sperm Protein OS=Caenorhabditis elegans GN=msp-74 PE=4 SV=1 - [G5EEW3_CAEEL]									90.48	18.18	1	1	1.7
A0A0K3AUJ4	C50D2.8	Uncharacterized protein OS=Caenorhabditis elegans GN=C50D2.8 PE=1 SV=1 - [A0A0K3AUJ4_CAEEL]									74.55	5.17	1	1	1.7
A0A061ACH8	B0001.3	Uncharacterized protein OS=Caenorhabditis elegans GN=B0001.3 PE=1 SV=1 - [A0A061ACH8_CAEEL]									31.23	2.26	1	1	1.7
O44887	inx-13	Innexin OS=Caenorhabditis elegans GN=inx-13 PE=1 SV=1 - [O44887_CAEEL]									38.38	2.34	1	1	1.7
P91482	CELE_T20F5.6	Uncharacterized protein OS=Caenorhabditis elegans GN=CELE_T20F5.6 PE=1 SV=2 - [P91482_CAEEL]									31.21	1.76	1	1	1.7
Q9GYJ9	snx-1	Sorting NeXin OS=Caenorhabditis elegans GN=snx-1 PE=1 SV=1 - [Q9GYJ9_CAEEL]									66.86	3.81	1	1	1.7
G5EE01	daf-18	DAF-18 OS=Caenorhabditis elegans GN=daf-18 PE=1 SV=1 - [G5EE01_CAEEL]									26.76	1.04	1	1	1.7
Q20943	mrp-2	Uncharacterized protein OS=Caenorhabditis elegans GN=mrp-2 PE=1 SV=2 - [Q20943_CAEEL]									37.13	0.59	1	1	1.7
Q21854	tag-147	Uncharacterized protein OS=Caenorhabditis elegans GN=tag-147 PE=1 SV=1 - [Q21854_CAEEL]									49.98	1.1	1	1	1.7
O44895	CELE_ZK484.3	Uncharacterized protein OS=Caenorhabditis elegans GN=CELE_ZK484.3 PE=1 SV=2 - [O44895_CAEEL]									51.96	4.15	1	1	1.7
W6RQW7	dapk-1	DAP (Death-Associated Protein) Kinase homolog OS=Caenorhabditis elegans GN=dapk-1 PE=1 SV=1 - [W6RQW7_CAEEL]									40.68	1.19	1	1	1.7
Q17339	gld-1	Female germline-specific tumor suppressor gld-1 OS=Caenorhabditis elegans GN=gld-1 PE=1 SV=1 - [GLD1_CAEEL]									33.53	2.16	1	1	1.7
G5EDT1	lin-35	Synthetic multivulva protein LIN-35 Rb OS=Caenorhabditis elegans GN=lin-35 PE=1 SV=1 - [G5EDT1_CAEEL]									43.07	1.04	1	1	1.7
Q9NEX6	CELE_Y105E8A.21	Uncharacterized protein OS=Caenorhabditis elegans GN=CELE_Y105E8A.21 PE=1 SV=1 - [Q9NEX6_CAEEL]									40.42	1.28	1	1	1.7
B0M0N9	glna-1	GLutamiNAse OS=Caenorhabditis elegans GN=glna-1 PE=1 SV=1 - [B0M0N9_CAEEL]									33.23	1.01	1	1	1.7
Q8TA83	dnj-10	DnaJ homolog dnj-10 OS=Caenorhabditis elegans GN=dnj-10 PE=3 SV=1 - [DNJ10_CAEEL]									31.6	1.75	1	1	1.7
Q19103	skih-2	SKI (Yeast SuperKIller) Helicase homolog OS=Caenorhabditis elegans GN=skih-2 PE=1 SV=3 - [Q19103_CAEEL]									21.23	0.71	1	1	1.7
D3DEL8	jac-1	Juxtamembrane domain-Associated Catenin OS=Caenorhabditis elegans GN=jac-1 PE=1 SV=1 - [D3DEL8_CAEEL]									0	0.69	1	1	1.7
O45665	CELE_K10C3.4	Uncharacterized protein OS=Caenorhabditis elegans GN=CELE_K10C3.4 PE=1 SV=1 - [O45665_CAEEL]									0	1.89	1	1	1.7
Q95Q34	riok-2	Serine/threonine-protein kinase RIO2 OS=Caenorhabditis elegans GN=riok-2 PE=2 SV=2 - [RIOK2_CAEEL]									23.83	2.65	1	1	1.7
H2KYA0	CELE_Y25C1A.8	Zinc finger Ran-binding domain-containing protein 2 OS=Caenorhabditis elegans GN=CELE_Y25C1A.8 PE=1 SV=1 - [H2KYA0_CAEEL]									39.6	3.48	1	1	1.7
Q5TKA3	acs-1	Fatty Acid CoA Synthetase family OS=Caenorhabditis elegans GN=acs-1 PE=1 SV=1 - [Q5TKA3_CAEEL]									36.4	1.9	1	1	1.7
Q20797	syx-5	Putative syntaxin-5 OS=Caenorhabditis elegans GN=syx-5 PE=3 SV=1 - [STX5_CAEEL]									30.08	2.42	1	1	1.7
Q9N3S8	CELE_Y47G6A.18	Uncharacterized protein OS=Caenorhabditis elegans GN=CELE_Y47G6A.18 PE=1 SV=2 - [Q9N3S8_CAEEL]									61.76	4.64	1	1	1.7
P34618	cec-1	Chromo domain-containing protein cec-1 OS=Caenorhabditis elegans GN=cec-1 PE=2 SV=1 - [CEC1_CAEEL]									34.44	4.93	1	1	1.7
Q94046	pis-1	PIS (Pax-2, IA-1/6, Smad-2 interacting protein) homolog OS=Caenorhabditis elegans GN=pis-1 PE=1 SV=1 - [Q94046_CAEEL]									54.58	1.12	1	1	1.7
E9RKC7	CELE_Y95B8A.8	Uncharacterized protein OS=Caenorhabditis elegans GN=CELE_Y95B8A.8 PE=1 SV=1 - [E9RKC7_CAEEL]									50.53	2.09	1	1	1.7
Q9XW26	sptf-3	SP (Specificity Protein) Transcription Factor OS=Caenorhabditis elegans GN=sptf-3 PE=1 SV=3 - [Q9XW26_CAEEL]									40.25	2.43	1	1	1.7
Q9N393	CELE_Y54H5A.1	Uncharacterized protein OS=Caenorhabditis elegans GN=CELE_Y54H5A.1 PE=1 SV=2 - [Q9N393_CAEEL]									85.13	2.43	1	1	1.7
Q23083	CELE_ZC8.6	Uncharacterized protein OS=Caenorhabditis elegans GN=CELE_ZC8.6 PE=1 SV=4 - [Q23083_CAEEL]									32.82	1.52	1	1	1.7
Q93413	drh-3	Dicer Related Helicase OS=Caenorhabditis elegans GN=drh-3 PE=1 SV=3 - [Q93413_CAEEL]									35.69	0.71	1	1	1.7
Q23166	CELE_W04G3.5	Uncharacterized protein OS=Caenorhabditis elegans GN=CELE_W04G3.5 PE=1 SV=1 - [Q23166_CAEEL]									25.29	2.55	1	1	1.7
G5EEN4	gck-3	Germinal center kinase 3 OS=Caenorhabditis elegans GN=gck-3 PE=1 SV=1 - [GCK3_CAEEL]									46.81	1.85	1	1	1.7
G5ECL3	prp-21	Pre-RNA processing 21 OS=Caenorhabditis elegans GN=prp-21 PE=1 SV=1 - [G5ECL3_CAEEL]									0	1.22	1	1	1.7
O45069	C11D2.4	Uncharacterized protein OS=Caenorhabditis elegans GN=C11D2.4 PE=1 SV=2 - [O45069_CAEEL]									40.57	2.91	1	1	1.7
Q17499	B0395.3	Uncharacterized protein OS=Caenorhabditis elegans GN=B0395.3 PE=1 SV=1 - [Q17499_CAEEL]									41.23	1.95	1	1	1.7
Q18864	sft-4	Surfeit locus protein 4 homolog OS=Caenorhabditis elegans GN=sft-4 PE=2 SV=1 - [SURF4_CAEEL]									33.21	3.97	1	1	1.7
Q22285	ttr-46	Transthyretin-like protein 46 OS=Caenorhabditis elegans GN=ttr-46 PE=3 SV=1 - [TTR46_CAEEL]									31.56	10.06	1	1	1.7
F3Y5R9	CELE_Y37H2A.1	Uncharacterized protein OS=Caenorhabditis elegans GN=CELE_Y37H2A.1 PE=1 SV=1 - [F3Y5R9_CAEEL]									29.66	1.74	1	1	1.7
U4PN22	pfs-2	Polyadenylation Factor Subunit homolog OS=Caenorhabditis elegans GN=pfs-2 PE=1 SV=1 - [U4PN22_CAEEL]									33.8	1.66	1	1	1.7
Q1RPT9	ncx-1	Na/Ca eXchangers OS=Caenorhabditis elegans GN=ncx-1 PE=1 SV=1 - [Q1RPT9_CAEEL]									40.73	2.18	1	1	1.7
O16298	hpo-18	Uncharacterized protein OS=Caenorhabditis elegans GN=hpo-18 PE=1 SV=1 - [O16298_CAEEL]									33.27	18.52	1	1	1.7
G5ED97	tag-65	SR-related CTD associated factor 6 OS=Caenorhabditis elegans GN=tag-65 PE=1 SV=1 - [G5ED97_CAEEL]									32.96	1.78	1	1	1.7
Q95PZ7	CELE_Y66D12A.9	Uncharacterized protein OS=Caenorhabditis elegans GN=CELE_Y66D12A.9 PE=1 SV=1 - [Q95PZ7_CAEEL]									24.38	6.05	1	1	1.7
Q966C7	CELE_Y24D9A.8	Transaldolase OS=Caenorhabditis elegans GN=CELE_Y24D9A.8 PE=1 SV=1 - [Q966C7_CAEEL]									20.53	5.02	1	1	1.7
O17536	hil-4	Histone H1.4 OS=Caenorhabditis elegans GN=hil-4 PE=2 SV=3 - [H14_CAEEL]									34.37	5.93	1	1	1.7
G5ECG0	tac-1	2P40 OS=Caenorhabditis elegans GN=tac-1 PE=1 SV=1 - [G5ECG0_CAEEL]									0	3.08	1	1	1.7
Q19954	vps-41	Vacuolar protein sorting-associated protein 41 homolog OS=Caenorhabditis elegans GN=vps-41 PE=3 SV=4 - [VPS41_CAEEL]									31.64	1.11	1	1	1.7
O16115	gst-2	Glutathione S-transferase 2 OS=Caenorhabditis elegans GN=gst-2 PE=2 SV=1 - [GST2_CAEEL]									22.67	3.72	1	1	1.7
P91997	CELE_F53F1.2	Uncharacterized protein OS=Caenorhabditis elegans GN=CELE_F53F1.2 PE=1 SV=1 - [P91997_CAEEL]									39.33	6.4	1	1	1.7
Q65XS9	dlc-5	Dynein Light Chain OS=Caenorhabditis elegans GN=dlc-5 PE=1 SV=1 - [Q65XS9_CAEEL]									0	4.84	1	1	1.7
Q9XXN2	immt-2	Inner Membrane of MiTochondria protein homolog OS=Caenorhabditis elegans GN=immt-2 PE=1 SV=2 - [Q9XXN2_CAEEL]									35.74	1.53	1	1	1.7
Q23536	lgg-2	Protein lgg-2 OS=Caenorhabditis elegans GN=lgg-2 PE=1 SV=1 - [LGG2_CAEEL]									33.9	10	1	1	1.7
Q17577	acs-7	Fatty Acid CoA Synthetase family OS=Caenorhabditis elegans GN=acs-7 PE=1 SV=1 - [Q17577_CAEEL]									27.46	1.3	1	1	1.7
Q4W5T0	mrpl-39	Mitochondrial Ribosomal Protein, Large OS=Caenorhabditis elegans GN=mrpl-39 PE=1 SV=1 - [Q4W5T0_CAEEL]									50.74	5.76	1	1	1.7
O02153	grd-14	GRounDhog (Hedgehog-like family) OS=Caenorhabditis elegans GN=grd-14 PE=1 SV=2 - [O02153_CAEEL]									37.28	5.84	1	1	1.7
Q20264	acs-11	Fatty Acid CoA Synthetase family OS=Caenorhabditis elegans GN=acs-11 PE=1 SV=3 - [Q20264_CAEEL]									24.73	2.18	1	1	1.7
Q0G821	ugt-23	UDP-glucuronosyltransferase OS=Caenorhabditis elegans GN=ugt-23 PE=1 SV=1 - [Q0G821_CAEEL]									26.83	6.21	1	1	1.7
Q23232	Y102E9.2	tRNA (guanine-N(7)-)-methyltransferase non-catalytic subunit OS=Caenorhabditis elegans GN=Y102E9.2 PE=3 SV=1 - [WDR4_CAEEL]									46.54	2.58	1	1	1.7
Q17532	B0564.7	Uncharacterized protein OS=Caenorhabditis elegans GN=B0564.7 PE=1 SV=2 - [Q17532_CAEEL]									0	1.33	1	1	1.7
D3NQ99	CELE_Y37A1B.5	Uncharacterized protein OS=Caenorhabditis elegans GN=CELE_Y37A1B.5 PE=1 SV=1 - [D3NQ99_CAEEL]									24.32	8.54	1	1	1.7
P45969	sds-22	Protein phosphatase 1 regulatory subunit SDS22 homolog OS=Caenorhabditis elegans GN=sds-22 PE=3 SV=1 - [SDS22_CAEEL]									33.9	2.45	1	1	1.7
H9G2Z9	CELE_F10D11.6	Uncharacterized protein OS=Caenorhabditis elegans GN=CELE_F10D11.6 PE=1 SV=1 - [H9G2Z9_CAEEL]									76.33	2.4	1	1	1.7
O44560	acs-3	Fatty Acid CoA Synthetase family OS=Caenorhabditis elegans GN=acs-3 PE=1 SV=2 - [O44560_CAEEL]									23.98	1.23	1	1	1.7
C6S3M5	gly-4	GLYcosylation related OS=Caenorhabditis elegans GN=gly-4 PE=1 SV=1 - [C6S3M5_CAEEL]									20.66	1.67	1	1	1.7
Q19294	mat-3	Cell division cycle protein 23 homolog OS=Caenorhabditis elegans GN=mat-3 PE=1 SV=2 - [CDC23_CAEEL]									48.09	1.49	1	1	1.7
Q9BKR5	CELE_Y82E9BR.18	Uncharacterized protein OS=Caenorhabditis elegans GN=CELE_Y82E9BR.18 PE=1 SV=2 - [Q9BKR5_CAEEL]									26.92	1.09	1	1	1.7
Q17796	hgrs-1	Hepatocyte Growth factor-Regulated TK Substrate (HRS) family OS=Caenorhabditis elegans GN=hgrs-1 PE=1 SV=2 - [Q17796_CAEEL]									35.68	1.1	1	1	1.7
Q18429	C34C6.4	Uncharacterized protein OS=Caenorhabditis elegans GN=C34C6.4 PE=1 SV=1 - [Q18429_CAEEL]									53.17	1.5	1	1	1.7
Q9XUN8	CELE_T20B3.1	Uncharacterized protein OS=Caenorhabditis elegans GN=CELE_T20B3.1 PE=1 SV=1 - [Q9XUN8_CAEEL]									37.97	1.64	1	1	1.7
O02168	aakg-2	AMP-Activated protein Kinase Gamma subunit OS=Caenorhabditis elegans GN=aakg-2 PE=1 SV=2 - [O02168_CAEEL]									40.99	2.6	1	1	1.7
Q17426	B0024.11	Putative pseudouridine synthase B0024.11 OS=Caenorhabditis elegans GN=B0024.11 PE=3 SV=1 - [YQ4B_CAEEL]									27.28	1.73	1	1	1.7
Q965N3	BE0003N10.1	Uncharacterized protein OS=Caenorhabditis elegans GN=BE0003N10.1 PE=1 SV=3 - [Q965N3_CAEEL]									33.6	1.36	1	1	1.7
Q22528	ekl-6	Uncharacterized protein OS=Caenorhabditis elegans GN=ekl-6 PE=1 SV=2 - [Q22528_CAEEL]									33.14	0.88	1	1	1.7
G5EDL3	air-1	Aurora/Ipl1 Related kinase OS=Caenorhabditis elegans GN=air-1 PE=1 SV=1 - [G5EDL3_CAEEL]									23.82	4.29	1	1	1.7
G5EG38	emb-27	Cell division cycle protein 16 homolog OS=Caenorhabditis elegans GN=emb-27 PE=1 SV=1 - [CDC16_CAEEL]									33.49	1.53	1	1	1.7
Q18310	C29F5.1	Uncharacterized protein OS=Caenorhabditis elegans GN=C29F5.1 PE=1 SV=1 - [Q18310_CAEEL]									70.04	3.13	1	1	1.7
Q21541	CELE_M142.5	Uncharacterized protein OS=Caenorhabditis elegans GN=CELE_M142.5 PE=1 SV=2 - [Q21541_CAEEL]									40.43	6.7	1	1	1.7
Q18028	prx-3	PeRoXisome assembly factor OS=Caenorhabditis elegans GN=prx-3 PE=1 SV=2 - [Q18028_CAEEL]									43.8	6.23	1	1	1.7
Q9BKR2	CELE_Y47A7.1	Uncharacterized protein OS=Caenorhabditis elegans GN=CELE_Y47A7.1 PE=1 SV=2 - [Q9BKR2_CAEEL]									28.62	0.9	1	1	1.7
Q93538	rbg-1	Rab3 GTPase-activating protein catalytic subunit OS=Caenorhabditis elegans GN=rbg-1 PE=3 SV=1 - [RB3GP_CAEEL]									49.21	1.42	1	1	1.7
Q21763	CELE_R05H5.3	Uncharacterized protein OS=Caenorhabditis elegans GN=CELE_R05H5.3 PE=1 SV=1 - [Q21763_CAEEL]									25.74	7.38	1	1	1.7
Q22437	CELE_T12G3.4	Uncharacterized protein OS=Caenorhabditis elegans GN=CELE_T12G3.4 PE=1 SV=1 - [Q22437_CAEEL]									36.75	2.91	1	1	1.7
O16462	grd-5	GRounDhog (Hedgehog-like family) OS=Caenorhabditis elegans GN=grd-5 PE=1 SV=1 - [O16462_CAEEL]									76.31	16.67	1	1	1.7
G4XR16	ND1	NADH-ubiquinone oxidoreductase chain 1 OS=Caenorhabditis elegans GN=ND1 PE=3 SV=1 - [G4XR16_CAEEL]									37.02	5.15	1	1	1.7
O17373	pho-14	Intestinal acid PHOsphatase OS=Caenorhabditis elegans GN=pho-14 PE=1 SV=1 - [O17373_CAEEL]									52.95	3.41	1	1	1.7
Q94416	CELE_ZK858.7	Uncharacterized protein OS=Caenorhabditis elegans GN=CELE_ZK858.7 PE=1 SV=3 - [Q94416_CAEEL]									56.67	3.19	1	1	1.7
Q20303	elo-6	Elongation of very long chain fatty acids protein 6 OS=Caenorhabditis elegans GN=elo-6 PE=1 SV=1 - [ELO6_CAEEL]									27.74	8.03	1	1	1.7
O45691	CELE_M01E5.2	Uncharacterized protein OS=Caenorhabditis elegans GN=CELE_M01E5.2 PE=1 SV=1 - [O45691_CAEEL]									20.45	3.07	1	1	1.7
H2KZN7	CELE_F41D9.2	Uncharacterized protein OS=Caenorhabditis elegans GN=CELE_F41D9.2 PE=1 SV=1 - [H2KZN7_CAEEL]									40.65	4.17	1	1	1.7
Q6A575	mrpl-21	Mitochondrial Ribosomal Protein, Large OS=Caenorhabditis elegans GN=mrpl-21 PE=1 SV=1 - [Q6A575_CAEEL]									22.91	9.94	1	1	1.7
Q21601	mrps-34	Mitochondrial Ribosomal Protein, Small OS=Caenorhabditis elegans GN=mrps-34 PE=1 SV=2 - [Q21601_CAEEL]									38.75	4.39	1	1	1.7
Q9XUS8	tyr-2	TYRosinase OS=Caenorhabditis elegans GN=tyr-2 PE=4 SV=1 - [Q9XUS8_CAEEL]									62.5	1.91	1	1	1.7
Q21270	cogc-6	Conserved oligomeric Golgi complex subunit 6 OS=Caenorhabditis elegans GN=cogc-6 PE=3 SV=1 - [COG6_CAEEL]									69.62	2.02	1	1	1.7
Q19661	CELE_F21C10.9	Uncharacterized protein OS=Caenorhabditis elegans GN=CELE_F21C10.9 PE=1 SV=3 - [Q19661_CAEEL]									44.55	5.36	1	1	1.7
Q19826	rpb-8	Probable DNA-directed RNA polymerases I, II, and III subunit RPABC3 OS=Caenorhabditis elegans GN=rpb-8 PE=1 SV=1 - [RPAB3_CAEEL]									22.65	17.57	1	1	1.7
O45319	tin-13	Mitochondrial import inner membrane translocase subunit tim-13 OS=Caenorhabditis elegans GN=tin-13 PE=3 SV=1 - [TIM13_CAEEL]									43.4	12.96	1	1	1.7
Q9N589	mtm-1	MTM (Myotubularin) family OS=Caenorhabditis elegans GN=mtm-1 PE=1 SV=2 - [Q9N589_CAEEL]									35.7	1.36	1	1	1.7
Q9XUV0	pbs-5	Proteasome subunit beta type OS=Caenorhabditis elegans GN=pbs-5 PE=1 SV=1 - [Q9XUV0_CAEEL]									39.21	2.46	1	1	1.7
O01925	mboa-6	Lysophospholipid acyltransferase 5 OS=Caenorhabditis elegans GN=mboa-6 PE=1 SV=2 - [MBOA5_CAEEL]									74.25	3.81	1	1	1.7
Q93561	cup-2	Derlin-1 OS=Caenorhabditis elegans GN=cup-2 PE=2 SV=1 - [DERL1_CAEEL]									30.81	6.94	1	1	1.7
Q22460	bca-1	Beta carbonic anhydrase 1 OS=Caenorhabditis elegans GN=bca-1 PE=3 SV=1 - [BCA1_CAEEL]									29.43	4.81	1	1	1.7
P43508	cpr-4	Cathepsin B-like cysteine proteinase 4 OS=Caenorhabditis elegans GN=cpr-4 PE=2 SV=1 - [CPR4_CAEEL]									61.99	5.37	1	1	1.7
P34673	fahd-1	Fumarylacetoacetate hydrolase domain-containing protein 1 OS=Caenorhabditis elegans GN=fahd-1 PE=3 SV=1 - [FAHD1_CAEEL]									42.75	8.41	1	1	1.7
Q9XWV3	arx-5	Probable actin-related protein 2/3 complex subunit 3 OS=Caenorhabditis elegans GN=arx-5 PE=3 SV=1 - [ARPC3_CAEEL]									75.86	14.21	1	1	1.7
A9Z1L6	C23H3.3	Uncharacterized protein OS=Caenorhabditis elegans GN=C23H3.3 PE=1 SV=1 - [A9Z1L6_CAEEL]									26.08	2.54	1	1	1.7
Q95QS3	mrps-26	Mitochondrial Ribosomal Protein, Small OS=Caenorhabditis elegans GN=mrps-26 PE=1 SV=1 - [Q95QS3_CAEEL]									39.07	4.31	1	1	1.7
H2KZ41	CELE_Y110A7A.15	Uncharacterized protein OS=Caenorhabditis elegans GN=CELE_Y110A7A.15 PE=1 SV=1 - [H2KZ41_CAEEL]									33.27	2.29	1	1	1.7
Q9U3P9	alkb-8	ALKylated DNA repair protein AlkB homolog OS=Caenorhabditis elegans GN=alkb-8 PE=1 SV=2 - [Q9U3P9_CAEEL]									23.83	1.18	1	1	1.7
Q9XW93	CELE_Y49A3A.3	Uncharacterized protein OS=Caenorhabditis elegans GN=CELE_Y49A3A.3 PE=1 SV=1 - [Q9XW93_CAEEL]									28.83	2.56	1	1	1.7
Q9XVJ0	acbp-5	Acyl-Coenzyme A Binding Protein OS=Caenorhabditis elegans GN=acbp-5 PE=1 SV=2 - [Q9XVJ0_CAEEL]									24.35	2.55	1	1	1.7
E1B6R5	CELE_F54C8.7	Uncharacterized protein OS=Caenorhabditis elegans GN=CELE_F54C8.7 PE=1 SV=1 - [E1B6R5_CAEEL]									0	4.55	1	1	1.7
A0A061ACM7	CELE_ZK792.1	Uncharacterized protein OS=Caenorhabditis elegans GN=CELE_ZK792.1 PE=1 SV=1 - [A0A061ACM7_CAEEL]									31.45	1.5	1	1	1.7
O17196	fbxa-163	F-box A protein OS=Caenorhabditis elegans GN=fbxa-163 PE=1 SV=1 - [O17196_CAEEL]									0	1.56	1	1	1.7
Q20546	CELE_F47G9.1	Uncharacterized protein OS=Caenorhabditis elegans GN=CELE_F47G9.1 PE=1 SV=1 - [Q20546_CAEEL]									34.91	3.43	1	1	1.7
Q9N413	pvf-1	PDGF/VEGF growth factor related OS=Caenorhabditis elegans GN=pvf-1 PE=1 SV=1 - [Q9N413_CAEEL]									47.02	2.3	1	1	1.7
Q22002	mab-10	Uncharacterized protein OS=Caenorhabditis elegans GN=mab-10 PE=1 SV=2 - [Q22002_CAEEL]									33.47	1.2	1	1	1.7
Q22529	CELE_T16G12.6	Uncharacterized protein OS=Caenorhabditis elegans GN=CELE_T16G12.6 PE=1 SV=1 - [Q22529_CAEEL]									0	0.75	1	1	1.7
O62216	CELE_F33H2.6	Uncharacterized protein OS=Caenorhabditis elegans GN=CELE_F33H2.6 PE=1 SV=2 - [O62216_CAEEL]									33.77	2.33	1	1	1.7
Q18547	rfc-3	RFC (DNA replication factor) family OS=Caenorhabditis elegans GN=rfc-3 PE=1 SV=1 - [Q18547_CAEEL]									22.33	2.26	1	1	1.7
V6CK76	rcor-1	RCOR (REST CO-Repressor) homolog OS=Caenorhabditis elegans GN=rcor-1 PE=1 SV=1 - [V6CK76_CAEEL]									29.96	1.5	1	1	1.7
E7EM30	C27A2.12	Uncharacterized protein OS=Caenorhabditis elegans GN=C27A2.12 PE=4 SV=1 - [E7EM30_CAEEL]									0	1.3	1	1	1.7
Q9N3L2	xpd-1	XPD (Xeroderma Pigmentosum complementation group D) related OS=Caenorhabditis elegans GN=xpd-1 PE=1 SV=3 - [Q9N3L2_CAEEL]									0	1.49	1	1	1.7
Q9TXT9	bcmo-2	Beta-Carotene 15,15'-MonoOxygenase OS=Caenorhabditis elegans GN=bcmo-2 PE=1 SV=2 - [Q9TXT9_CAEEL]									54.15	3.02	1	1	1.7
Q9NAI9	CELE_Y38E10A.22	Uncharacterized protein OS=Caenorhabditis elegans GN=CELE_Y38E10A.22 PE=1 SV=2 - [Q9NAI9_CAEEL]									29.96	2.62	1	1	1.7
Q17746	C06G3.6	Uncharacterized protein OS=Caenorhabditis elegans GN=C06G3.6 PE=1 SV=1 - [Q17746_CAEEL]									27.71	1.81	1	1	1.7
P91151	cogc-5	Conserved Oligomeric Golgi (COG) Component OS=Caenorhabditis elegans GN=cogc-5 PE=1 SV=2 - [P91151_CAEEL]									32.69	1.37	1	1	1.7
Q21225	vacl-14	VAC (Yeast VACuole morphology)-Like OS=Caenorhabditis elegans GN=vacl-14 PE=1 SV=1 - [Q21225_CAEEL]									31.92	1.15	1	1	1.7
G5EGA7	ras-2	GTP binding protein OS=Caenorhabditis elegans GN=ras-2 PE=1 SV=1 - [G5EGA7_CAEEL]									26.25	5.21	1	1	1.7
G5EGS7	sel-7	SEL-7 OS=Caenorhabditis elegans GN=sel-7 PE=2 SV=1 - [G5EGS7_CAEEL]									39.43	2.47	1	1	1.7
U4PC16	CELE_Y69A2AR.16	Uncharacterized protein OS=Caenorhabditis elegans GN=CELE_Y69A2AR.16 PE=1 SV=1 - [U4PC16_CAEEL]									23.6	1.46	1	1	1.7
I7FN77	rab-33	Rab-33 (Fragment) OS=Caenorhabditis elegans GN=rab-33 PE=2 SV=1 - [I7FN77_CAEEL]									30.89	5.88	1	1	1.7
Q9TZI7	acs-16	Fatty Acid CoA Synthetase family OS=Caenorhabditis elegans GN=acs-16 PE=1 SV=2 - [Q9TZI7_CAEEL]									25.91	1.58	1	1	1.7
Q22134	ppat-1	Amidophosphoribosyltransferase OS=Caenorhabditis elegans GN=ppat-1 PE=1 SV=1 - [Q22134_CAEEL]									25.88	2.08	1	1	1.7
O44738	CELE_F57B10.5	Uncharacterized protein OS=Caenorhabditis elegans GN=CELE_F57B10.5 PE=1 SV=1 - [O44738_CAEEL]									37.63	4.43	1	1	1.7
Q17557	sco-1	SCO (Yeast Suppressor of Cytochrome Oxidase deficiency) homolog OS=Caenorhabditis elegans GN=sco-1 PE=1 SV=1 - [Q17557_CAEEL]									42.78	3.53	1	1	1.7
Q23643	chpf-1	Calcineurin-like EF-Hand Protein Family member OS=Caenorhabditis elegans GN=chpf-1 PE=1 SV=1 - [Q23643_CAEEL]									33.01	5.13	1	1	1.7
O76576	pqn-48	Prion-like-(Q/N-rich)-domain-bearing protein OS=Caenorhabditis elegans GN=pqn-48 PE=1 SV=2 - [O76576_CAEEL]									37.16	3.13	1	1	1.7
Q86MJ6	ckc-1	Choline Kinase C OS=Caenorhabditis elegans GN=ckc-1 PE=1 SV=1 - [Q86MJ6_CAEEL]									31.98	2.76	1	1	1.7
H2KZ71	CELE_ZC477.3	Uncharacterized protein OS=Caenorhabditis elegans GN=CELE_ZC477.3 PE=1 SV=1 - [H2KZ71_CAEEL]									26.47	4.72	1	1	1.7
Q9XVF1	C04F12.1	Uncharacterized protein OS=Caenorhabditis elegans GN=C04F12.1 PE=1 SV=1 - [Q9XVF1_CAEEL]									37.88	1.27	1	1	1.7
Q9BL94	CELE_Y18H1A.4	Uncharacterized protein OS=Caenorhabditis elegans GN=CELE_Y18H1A.4 PE=1 SV=2 - [Q9BL94_CAEEL]									42.37	5.45	1	1	1.7
Q17477	B0334.5	Uncharacterized protein OS=Caenorhabditis elegans GN=B0334.5 PE=1 SV=4 - [Q17477_CAEEL]									57.97	3.1	1	1	1.7
Q22483	CELE_T14B4.2	Uncharacterized protein OS=Caenorhabditis elegans GN=CELE_T14B4.2 PE=1 SV=2 - [Q22483_CAEEL]									36.89	8.63	1	1	1.7
E1B6Q7	CELE_F45F2.9	Uncharacterized protein OS=Caenorhabditis elegans GN=CELE_F45F2.9 PE=1 SV=1 - [E1B6Q7_CAEEL]									58.85	6.42	1	1	1.7
A0A0K3AU20	CELE_T01D1.4	Uncharacterized protein OS=Caenorhabditis elegans GN=CELE_T01D1.4 PE=1 SV=1 - [A0A0K3AU20_CAEEL]									26.45	11.82	1	1	1.7
O76616	CELE_Y23H5A.3	Uncharacterized protein OS=Caenorhabditis elegans GN=CELE_Y23H5A.3 PE=1 SV=1 - [O76616_CAEEL]									30.93	3.58	1	1	1.7
Q2EEM8	ttr-45	TransThyretin-Related family domain OS=Caenorhabditis elegans GN=ttr-45 PE=1 SV=1 - [Q2EEM8_CAEEL]									46.63	10	1	1	1.7
H2KZA1	nhr-88	Nuclear Hormone Receptor family OS=Caenorhabditis elegans GN=nhr-88 PE=1 SV=1 - [H2KZA1_CAEEL]									25.18	2.19	1	1	1.7
Q20392	CELE_F44D12.2	Uncharacterized protein OS=Caenorhabditis elegans GN=CELE_F44D12.2 PE=1 SV=3 - [Q20392_CAEEL]									42.34	4.39	1	1	1.7
Q20340	CELE_F42F12.4	1,2-dihydroxy-3-keto-5-methylthiopentene dioxygenase OS=Caenorhabditis elegans GN=CELE_F42F12.4 PE=1 SV=2 - [Q20340_CAEEL]									81.29	7.87	1	1	1.7
Q21910	CELE_R10E9.2	Uncharacterized protein OS=Caenorhabditis elegans GN=CELE_R10E9.2 PE=4 SV=1 - [Q21910_CAEEL]									47.62	6.18	1	1	1.7
Q17962	C14B1.3	Uncharacterized protein OS=Caenorhabditis elegans GN=C14B1.3 PE=1 SV=1 - [Q17962_CAEEL]									48.23	3.65	1	1	1.7
O16198	gst-33	Glutathione S-Transferase OS=Caenorhabditis elegans GN=gst-33 PE=1 SV=1 - [O16198_CAEEL]									64.89	7.51	1	1	1.7
G8JYG1	nxt-1	NTF2-related eXporT protein OS=Caenorhabditis elegans GN=nxt-1 PE=1 SV=1 - [G8JYG1_CAEEL]									58.92	12.21	1	1	1.7
G5EET3	cdr-6	CaDmium Responsive OS=Caenorhabditis elegans GN=cdr-6 PE=1 SV=1 - [G5EET3_CAEEL]									75.39	6.14	1	1	1.7
Q966L2	CELE_E01A2.1	Uncharacterized protein OS=Caenorhabditis elegans GN=CELE_E01A2.1 PE=1 SV=1 - [Q966L2_CAEEL]									30.02	6.52	1	1	1.7
Q2HQL8	CELE_Y43F8B.1	Uncharacterized protein OS=Caenorhabditis elegans GN=CELE_Y43F8B.1 PE=1 SV=1 - [Q2HQL8_CAEEL]									38.53	6.15	1	1	1.7
Q965Y1	map-1	Methionine aminopeptidase 1 OS=Caenorhabditis elegans GN=map-1 PE=1 SV=2 - [Q965Y1_CAEEL]									49.45	4.85	1	1	1.7
G5EF70	CELE_Y45F10B.13	Uncharacterized protein OS=Caenorhabditis elegans GN=CELE_Y45F10B.13 PE=1 SV=1 - [G5EF70_CAEEL]									20.88	8.65	1	1	1.7
H2FLJ4	CELE_F21A3.11	Purple acid phosphatase OS=Caenorhabditis elegans GN=CELE_F21A3.11 PE=1 SV=1 - [H2FLJ4_CAEEL]									60.52	3.83	1	1	1.7
Q9XWK5	CELE_Y48A6C.4	Uncharacterized protein OS=Caenorhabditis elegans GN=CELE_Y48A6C.4 PE=1 SV=2 - [Q9XWK5_CAEEL]									51.37	5.48	1	1	1.7
Q22721	CELE_T24C12.3	Uncharacterized protein OS=Caenorhabditis elegans GN=CELE_T24C12.3 PE=1 SV=2 - [Q22721_CAEEL]									26.3	3.53	1	1	1.7
O01965	ari-1	ARI (Ubiquitin ligase Ariadne) homolog OS=Caenorhabditis elegans GN=ari-1 PE=1 SV=3 - [O01965_CAEEL]									22.75	3.85	1	1	1.7
Q23565	clec-61	C-type LECtin OS=Caenorhabditis elegans GN=clec-61 PE=1 SV=1 - [Q23565_CAEEL]									29.46	5.46	1	1	1.7
P34689	glh-1	ATP-dependent RNA helicase glh-1 OS=Caenorhabditis elegans GN=glh-1 PE=1 SV=3 - [GLH1_CAEEL]	101.87	6.68	4	5	137.381	9.31	6	7	340.416	17.96	10	16	1.69
Q10454	F46H5.3	Probable arginine kinase F46H5.3 OS=Caenorhabditis elegans GN=F46H5.3 PE=3 SV=2 - [KARG1_CAEEL]	628.907	33.33	11	19	419.367	27.53	8	12	1228.19	44.19	17	38	1.69
Q9UB28	let-805	Myotactin form B OS=Caenorhabditis elegans GN=let-805 PE=1 SV=1 - [Q9UB28_CAEEL]	2288.18	15.75	56	89	2955.44	17.3	66	112	7278.43	28.04	104	249	1.68
Q09249	C16C10.3	Uncharacterized protein C16C10.3 OS=Caenorhabditis elegans GN=C16C10.3 PE=3 SV=1 - [YQ53_CAEEL]	25.26	0.97	1	1					61.19	1.84	2	2	1.66
Q20086	ugt-58	Putative UDP-glucuronosyltransferase ugt-58 OS=Caenorhabditis elegans GN=ugt-58 PE=3 SV=2 - [UGT58_CAEEL]	40.53	1.69	1	1					52.26	3.56	2	2	1.66
P34280	C02F5.3	Uncharacterized GTP-binding protein C02F5.3 OS=Caenorhabditis elegans GN=C02F5.3 PE=3 SV=2 - [YKK3_CAEEL]	44.64	2.73	1	1					45.5	4.92	2	2	1.66
Q20932	byn-1	Cell adhesion protein byn-1 OS=Caenorhabditis elegans GN=byn-1 PE=3 SV=2 - [BYN1_CAEEL]	51.33	1.78	1	1					44.9751	4.23	2	2	1.66
Q9U489	lin-41	Protein lin-41 OS=Caenorhabditis elegans GN=lin-41 PE=1 SV=1 - [LIN41_CAEEL]	22.04	0.7	1	1					32.05	1.74	2	2	1.66
Q9U2R0	Y17G7B.18	Probable RNA methyltransferase Y17G7B.18 OS=Caenorhabditis elegans GN=Y17G7B.18 PE=3 SV=1 - [BIN3D_CAEEL]	32.29	3.17	1	1					80.67	7.14	2	2	1.66
P91306	cey-2	C. Elegans Y-box OS=Caenorhabditis elegans GN=cey-2 PE=1 SV=1 - [P91306_CAEEL]	62.04	5.99	1	1					145.45	11.99	2	2	1.66
P90790	CELE_D2030.3	Uncharacterized protein OS=Caenorhabditis elegans GN=CELE_D2030.3 PE=1 SV=1 - [P90790_CAEEL]	37.33	1.97	1	1					79.5419	1.97	1	2	1.66
G5ECG7	dsc-4	Defecation Suppressor of Clk-1 OS=Caenorhabditis elegans GN=dsc-4 PE=1 SV=1 - [G5ECG7_CAEEL]	34.93	0.9	1	1					28.49	2.69	2	2	1.66
W6RRU8	ntl-4	NOT-Like (Yeast CCR4/NOT complex component) OS=Caenorhabditis elegans GN=ntl-4 PE=1 SV=1 - [W6RRU8_CAEEL]	33.54	1.26	1	1					49.5655	2.39	2	2	1.66
B5BM25	ifg-1	Initiation Factor 4G (EIF4G) family OS=Caenorhabditis elegans GN=ifg-1 PE=1 SV=1 - [B5BM25_CAEEL]	38.8	1.89	1	1					45.5	2.18	2	2	1.66
O01894	npl-4.2	NPL (Yeast Nuclear Protein Localization) homolog OS=Caenorhabditis elegans GN=npl-4.2 PE=4 SV=1 - [O01894_CAEEL]	42.54	3.61	1	1					53.26	5.88	2	2	1.66
J7S127	CELE_ZK287.1	Uncharacterized protein OS=Caenorhabditis elegans GN=CELE_ZK287.1 PE=1 SV=1 - [J7S127_CAEEL]	23.72	1.62	1	1					50.4177	1.62	1	2	1.66
G5EEL9	hmg-11	HMG OS=Caenorhabditis elegans GN=hmg-11 PE=1 SV=1 - [G5EEL9_CAEEL]	22.44	9.49	1	1					61.31	20.44	2	2	1.66
Q9NES7	CELE_Y39B6A.1	Uncharacterized protein OS=Caenorhabditis elegans GN=CELE_Y39B6A.1 PE=1 SV=1 - [Q9NES7_CAEEL]	32.23	1.9	1	1					50.46	3.4	2	2	1.66
A0A061ACL3	cars-1	Cysteinyl Amino-acyl tRNA Synthetase OS=Caenorhabditis elegans GN=cars-1 PE=1 SV=1 - [A0A061ACL3_CAEEL]	44.57	1.46	1	1					39.26	2.92	2	2	1.66
O44549	acdh-3	Acyl CoA DeHydrogenase OS=Caenorhabditis elegans GN=acdh-3 PE=1 SV=1 - [O44549_CAEEL]	89.93	4.3	1	1					43.59	4.3	2	2	1.66
G5EG62	unc-45	UNC-45 OS=Caenorhabditis elegans GN=unc-45 PE=1 SV=1 - [G5EG62_CAEEL]	45.31	1.25	1	1					33.876	1.66	2	2	1.66
Q23191	puf-9	PUF (Pumilio/FBF) domain-containing OS=Caenorhabditis elegans GN=puf-9 PE=1 SV=2 - [Q23191_CAEEL]	20.81	1.42	1	1					47.35	2.56	2	2	1.66
G5EFU4	oac-34	O-ACyltransferase homolog OS=Caenorhabditis elegans GN=oac-34 PE=4 SV=1 - [G5EFU4_CAEEL]	41.57	0.94	1	1		0			29.96	0.94	1	2	1.66
Q95XS2	CELE_Y38F2AR.9	Uncharacterized protein OS=Caenorhabditis elegans GN=CELE_Y38F2AR.9 PE=1 SV=1 - [Q95XS2_CAEEL]	27.8	12.35	1	1					42.26	12.35	1	2	1.66
Q9XUP3	eif-3.K	Eukaryotic translation initiation factor 3 subunit K OS=Caenorhabditis elegans GN=eif-3.K PE=2 SV=1 - [EIF3K_CAEEL]	58.74	9.17	1	1					35.71	4.58	1	2	1.66
Q6EZG5	hum-8	Heavy chain, Unconventional Myosin OS=Caenorhabditis elegans GN=hum-8 PE=1 SV=3 - [Q6EZG5_CAEEL]	24.39	0.92	1	1					49.71	2.27	2	2	1.66
Q8ITZ0	fum-1	FUMarase OS=Caenorhabditis elegans GN=fum-1 PE=1 SV=1 - [Q8ITZ0_CAEEL]	71.39	5.49	1	1					83.14	14.02	2	2	1.66
V6CJJ8	wwp-1	WW domain Protein (E3 ubiquitin ligase) OS=Caenorhabditis elegans GN=wwp-1 PE=1 SV=1 - [V6CJJ8_CAEEL]	0	1.19	1	1					40.66	5.54	2	2	1.66
Q17974	mma-1	Uncharacterized protein OS=Caenorhabditis elegans GN=mma-1 PE=1 SV=1 - [Q17974_CAEEL]	36.15	0.95	1	1					57.73	2.08	2	2	1.66
Q19116	CELE_F02D10.6	Uncharacterized protein OS=Caenorhabditis elegans GN=CELE_F02D10.6 PE=4 SV=1 - [Q19116_CAEEL]	39	3.52	1	1		0			49.03	3.52	1	2	1.66
O76449	CELE_ZK1055.7	Uncharacterized protein OS=Caenorhabditis elegans GN=CELE_ZK1055.7 PE=1 SV=1 - [O76449_CAEEL]	48.81	2.11	1	1					96.51	2.11	1	2	1.66
U4PE16	ctl-3	Catalase OS=Caenorhabditis elegans GN=ctl-3 PE=1 SV=1 - [U4PE16_CAEEL]	27.72	2.23	1	1					43.8031	3.25	2	2	1.66
G5EFD7	CELE_F46C5.9	Uncharacterized protein OS=Caenorhabditis elegans GN=CELE_F46C5.9 PE=1 SV=1 - [G5EFD7_CAEEL]	60.87	3.55	1	1					41.93	5.76	2	2	1.66
Q9BPN8	Y92H12BR.3	Uncharacterized protein Y92H12BR.3 OS=Caenorhabditis elegans GN=Y92H12BR.3 PE=1 SV=2 - [Y92H3_CAEEL]	22.06	1.41	1	1					45.36	3.3	2	2	1.66
Q19246	dhs-25	DeHydrogenases, Short chain OS=Caenorhabditis elegans GN=dhs-25 PE=1 SV=2 - [Q19246_CAEEL]	44.45	4.03	1	1		0			67.85	9.27	2	2	1.66
G5EEE5	elo-1	Elongation of very long chain fatty acids protein OS=Caenorhabditis elegans GN=elo-1 PE=1 SV=1 - [G5EEE5_CAEEL]	31.3	3.47	1	1					54.91	7.64	2	2	1.66
Q9BKS1	elc-1	ELongin C OS=Caenorhabditis elegans GN=elc-1 PE=1 SV=1 - [Q9BKS1_CAEEL]	33.36	11.29	1	1					80.85	19.35	2	2	1.66
Q22438	mrpl-51	39S ribosomal protein L51, mitochondrial OS=Caenorhabditis elegans GN=mrpl-51 PE=3 SV=1 - [RM51_CAEEL]	26.88	8.04	1	1					35.88	12.56	2	2	1.66
Q21993	pfd-5	Probable prefoldin subunit 5 OS=Caenorhabditis elegans GN=pfd-5 PE=2 SV=1 - [PFD5_CAEEL]	23.94	12.5	1	1					61.77	23.68	2	2	1.66
Q9GYI4	psr-1	Bifunctional arginine demethylase and lysyl-hydroxylase psr-1 OS=Caenorhabditis elegans GN=psr-1 PE=1 SV=2 - [JMJD6_CAEEL]	36.3	3.75	1	1					120.76	3.75	1	2	1.66
Q95ZT6	CELE_F43H9.4	Uncharacterized protein OS=Caenorhabditis elegans GN=CELE_F43H9.4 PE=1 SV=1 - [Q95ZT6_CAEEL]	21.04	3.7	1	1					45.17	7.74	2	2	1.66
G5EG26	R151.8A	R151.8A protein OS=Caenorhabditis elegans GN=R151.8A PE=1 SV=1 - [G5EG26_CAEEL]	34.92	5.15	1	1					46.67	10.3	2	2	1.66
P90912	cri-1	Conserved Regulator of Innate immunity OS=Caenorhabditis elegans GN=cri-1 PE=4 SV=2 - [P90912_CAEEL]	25.18	2.89	1	1					43.48	6.36	2	2	1.66
G5EDQ6	grl-25	GRound-Like (Grd related) OS=Caenorhabditis elegans GN=grl-25 PE=4 SV=1 - [G5EDQ6_CAEEL]	40.41	1.68	1	1					97.97	1.68	1	2	1.66
A7DT45	oxy-5	Uncharacterized protein OS=Caenorhabditis elegans GN=oxy-5 PE=1 SV=1 - [A7DT45_CAEEL]	92.95	10.49	1	1					130.87	17.9	2	2	1.66
Q95QH4	CELE_F32A5.8	Uncharacterized protein OS=Caenorhabditis elegans GN=CELE_F32A5.8 PE=1 SV=2 - [Q95QH4_CAEEL]	64.66	6.61	1	1					68.9603	9.34	2	2	1.66
Q9U354	vps-25	Related to yeast Vacuolar Protein Sorting factor OS=Caenorhabditis elegans GN=vps-25 PE=1 SV=1 - [Q9U354_CAEEL]	54.4	8.74	1	1					51.68	19.13	2	2	1.66
Q93805	ttr-31	TransThyretin-Related family domain OS=Caenorhabditis elegans GN=ttr-31 PE=1 SV=1 - [Q93805_CAEEL]	24.31	12.84	1	1					66.94	25	2	2	1.66
Q9XXA2	ebp-2	Microtubule End Binding Protein OS=Caenorhabditis elegans GN=ebp-2 PE=1 SV=1 - [Q9XXA2_CAEEL]	79.67	6.35	1	1					120.02	10.37	2	2	1.66
H2L046	tag-163	Uncharacterized protein OS=Caenorhabditis elegans GN=tag-163 PE=1 SV=1 - [H2L046_CAEEL]	68.18	1.37	1	1	80.7633	2.11	2	3	178.8	4.74	4	6	1.65
Q21233	nuo-4	NADH Ubiquinone Oxidoreductase OS=Caenorhabditis elegans GN=nuo-4 PE=1 SV=1 - [Q21233_CAEEL]	177.156	16.97	6	7	54.5	6.19	2	2	312.695	21.33	7	11	1.65
O02365	ifa-2	Intermediate filament protein ifa-2 OS=Caenorhabditis elegans GN=ifa-2 PE=1 SV=1 - [IFA2_CAEEL]	235.883	17.73	9	13	104.798	5.51	3	4	474.362	26.16	14	20	1.65
O61742	rpn-10	Proteasome Regulatory Particle, Non-ATPase-like OS=Caenorhabditis elegans GN=rpn-10 PE=1 SV=2 - [O61742_CAEEL]	27.15	10.12	2	2	42.56	15.61	3	3	261.089	11.85	3	7	1.64
Q17761	T25B9.9	6-phosphogluconate dehydrogenase, decarboxylating OS=Caenorhabditis elegans GN=T25B9.9 PE=3 SV=2 - [6PGD_CAEEL]	90.65	4.96	2	2					95.9833	4.96	2	3	1.64
O01479	unc-94	Tropomodulin OS=Caenorhabditis elegans GN=unc-94 PE=1 SV=2 - [TMOD_CAEEL]	103.78	7.65	2	2					141.88	10.97	3	3	1.64
Q2HQL4	gln-3	Glutamine synthetase OS=Caenorhabditis elegans GN=gln-3 PE=1 SV=1 - [Q2HQL4_CAEEL]	55.144	4.94	2	2					99.4355	10.13	3	3	1.64
G5ECC9	CELE_K11B4.1	Uncharacterized protein OS=Caenorhabditis elegans GN=CELE_K11B4.1 PE=1 SV=1 - [G5ECC9_CAEEL]	69.33	6.6	2	2					79.7	6.84	3	3	1.64
Q9N584	let-630	Uncharacterized protein OS=Caenorhabditis elegans GN=let-630 PE=1 SV=1 - [Q9N584_CAEEL]	67.98	3.03	2	2					115.614	3.64	2	3	1.64
Q21115	sec-12	Yeast SEC homolog OS=Caenorhabditis elegans GN=sec-12 PE=1 SV=2 - [Q21115_CAEEL]	45.61	2.82	1	2					69.8433	8.71	3	3	1.64
O45398	CELE_F22G12.4	Uncharacterized protein OS=Caenorhabditis elegans GN=CELE_F22G12.4 PE=1 SV=3 - [O45398_CAEEL]	81.95	1.99	2	2					89.87	3.79	3	3	1.64
Q93208	col-35	COLlagen OS=Caenorhabditis elegans GN=col-35 PE=1 SV=3 - [Q93208_CAEEL]	66.52	3.51	1	2					99.7533	17.54	2	3	1.64
Q22412	CELE_T11G6.8	Uncharacterized protein OS=Caenorhabditis elegans GN=CELE_T11G6.8 PE=1 SV=2 - [Q22412_CAEEL]	63.97	7.6	2	2					156.713	13.97	3	3	1.64
G4S034	spc-1	SPeCtrin OS=Caenorhabditis elegans GN=spc-1 PE=1 SV=2 - [G4S034_CAEEL]	160.79	4.24	8	8	125.622	1.98	4	5	438.086	7.05	13	16	1.64
Q09590	emb-8	NADPH--cytochrome P450 reductase OS=Caenorhabditis elegans GN=emb-8 PE=1 SV=1 - [Q09590_CAEEL]	128.209	13.6	8	9	111.149	8.61	5	5	493.576	16.47	10	17	1.64
Q23315	ears-1	Glutamyl(E) Amino-acyl tRNA Synthetase OS=Caenorhabditis elegans GN=ears-1 PE=1 SV=1 - [Q23315_CAEEL]	127.212	8.88	9	9	53.8	1.83	2	2	207.824	11.31	11	13	1.64
Q3S1J5	uba-1	UBA (Human ubiquitin) related OS=Caenorhabditis elegans GN=uba-1 PE=1 SV=1 - [Q3S1J5_CAEEL]	395.633	12.06	11	16	260.8	10.41	9	10	923.495	23.35	20	31	1.64
P90795	T25G3.4	Probable glycerol-3-phosphate dehydrogenase, mitochondrial OS=Caenorhabditis elegans GN=T25G3.4 PE=3 SV=2 - [GPDM_CAEEL]	101.66	5.26	3	4	164.515	9.28	6	6	430.159	19.53	11	13	1.63
Q95QW0	eif-3.L	Eukaryotic translation initiation factor 3 subunit L OS=Caenorhabditis elegans GN=eif-3.L PE=3 SV=1 - [EIF3L_CAEEL]	289.585	20.48	10	13	134.45	11.73	5	5	421.508	29.8	14	21	1.63
Q17832	vgln-1	ViGiLN homolog OS=Caenorhabditis elegans GN=vgln-1 PE=1 SV=2 - [Q17832_CAEEL]	617.316	17.95	22	31	192.623	8.28	11	13	975.812	24.43	28	50	1.62
Q20719	F53F4.10	Probable NADH dehydrogenase [ubiquinone] flavoprotein 2, mitochondrial OS=Caenorhabditis elegans GN=F53F4.10 PE=3 SV=1 - [NDUV2_CAEEL]	76.2086	10.46	3	4					123.237	15.06	3	5	1.61
Q965N8	Y46E12BL.2	Uncharacterized protein OS=Caenorhabditis elegans GN=Y46E12BL.2 PE=1 SV=1 - [Q965N8_CAEEL]	93.1061	3.3	5	5					96.6467	5.1	5	6	1.61
Q19722	nrs-1	Asparagine--tRNA ligase, cytoplasmic OS=Caenorhabditis elegans GN=nrs-1 PE=3 SV=1 - [SYNC_CAEEL]	166.19	15.41	7	8	125.97	9.91	6	6	324.245	23.67	12	17	1.61
O17071	rpt-4	Probable 26S protease regulatory subunit 10B OS=Caenorhabditis elegans GN=rpt-4 PE=1 SV=2 - [PRS10_CAEEL]	521.035	33.25	11	17	198.12	13.3	4	6	906.501	42.36	15	26	1.6
Q9TYY8	CELE_H34C03.2	Ubiquitin carboxyl-terminal hydrolase OS=Caenorhabditis elegans GN=CELE_H34C03.2 PE=1 SV=1 - [Q9TYY8_CAEEL]	88.34	4.44	4	4	71.3	3.67	3	4	250.044	10.11	9	10	1.58
Q9N5V3	imb-3	IMportin Beta family OS=Caenorhabditis elegans GN=imb-3 PE=1 SV=2 - [Q9N5V3_CAEEL]	161.391	9.71	8	10	87.87	4.58	4	4	355.705	9.71	8	16	1.58
Q9XWZ2	acdh-11	Acyl-CoA dehydrogenase family member 11 OS=Caenorhabditis elegans GN=acdh-11 PE=1 SV=1 - [ACD11_CAEEL]	226.217	13.94	8	9	236.558	13.94	8	8	528.341	30.96	17	20	1.57
P50140	hsp-60	Chaperonin homolog Hsp-60, mitochondrial OS=Caenorhabditis elegans GN=hsp-60 PE=2 SV=2 - [CH60_CAEEL]	433.684	25	12	17	152.229	16.73	8	8	728.079	33.63	18	28	1.57
Q22018	dtmk-1	Thymidylate kinase OS=Caenorhabditis elegans GN=dtmk-1 PE=3 SV=1 - [KTHY_CAEEL]	245.4	31.19	5	6	39.39	5.05	1	1	365.929	31.19	5	8	1.55
G5ED41	cand-1	Cullin-associated NEDD8-dissociated protein 1 OS=Caenorhabditis elegans GN=cand-1 PE=1 SV=1 - [CAND1_CAEEL]	183.938	7.77	8	9	74.66	3.53	5	5	433.043	15.23	15	16	1.55
O61199	ogdh-1	2-oxoglutarate dehydrogenase, mitochondrial OS=Caenorhabditis elegans GN=ogdh-1 PE=1 SV=2 - [ODO1_CAEEL]	255.155	10.3	8	9	274.321	10.88	8	9	693.931	14.48	12	21	1.55
Q11190	let-721	Electron transfer flavoprotein-ubiquinone oxidoreductase, mitochondrial OS=Caenorhabditis elegans GN=let-721 PE=3 SV=2 - [ETFD_CAEEL]	31.17	1.51	1	1	20.84	1.51	1	1	129.3	4.86	2	3	1.54
Q23270	trm-1	tRNA (guanine(26)-N(2))-dimethyltransferase OS=Caenorhabditis elegans GN=trm-1 PE=1 SV=1 - [TRM1_CAEEL]	40.67	2.09	1	1	57.6	2.09	1	1	76.63	6.84	3	3	1.54
Q18678	srs-2	Probable serine--tRNA ligase, cytoplasmic OS=Caenorhabditis elegans GN=srs-2 PE=3 SV=1 - [SYSC_CAEEL]	23.57	3.08	1	1	37.55	3.08	1	1	95.85	5.75	2	3	1.54
Q17632	dis-3	Probable exosome complex exonuclease RRP44 OS=Caenorhabditis elegans GN=dis-3 PE=3 SV=2 - [RRP44_CAEEL]	46.92	0.94	1	1	44.02	0.94	1	1	60.6933	4.16	3	3	1.54
O01815	dhod-1	Dihydroorotate dehydrogenase (quinone), mitochondrial OS=Caenorhabditis elegans GN=dhod-1 PE=1 SV=1 - [O01815_CAEEL]	40.44	2.19	1	1	33.57	5.11	1	1	78.6769	6.57	3	3	1.54
Q17361	usp-14	Ubiquitin carboxyl-terminal hydrolase 14 OS=Caenorhabditis elegans GN=usp-14 PE=2 SV=2 - [UBP14_CAEEL]	86.12	2.66	1	1	64.89	2.66	1	1	94.94	4.29	2	3	1.54
Q18916	acs-22	Fatty Acid CoA Synthetase family OS=Caenorhabditis elegans GN=acs-22 PE=1 SV=1 - [Q18916_CAEEL]	53.37	1.53	1	1	63.66	1.53	1	1	116.457	5.8	3	3	1.54
O76606	mrpl-28	Mitochondrial Ribosomal Protein, Large OS=Caenorhabditis elegans GN=mrpl-28 PE=1 SV=1 - [O76606_CAEEL]	25.12	2.26	1	1	25.45	2.26	1	1	42.7067	7.74	3	3	1.54
Q95XN1	CELE_Y71G12B.10	Uncharacterized protein OS=Caenorhabditis elegans GN=CELE_Y71G12B.10 PE=1 SV=1 - [Q95XN1_CAEEL]	49.73	5.03	1	1	38.96	5.03	1	1	74.27	7.23	2	3	1.54
O02220	mrpl-34	Mitochondrial Ribosomal Protein, Large OS=Caenorhabditis elegans GN=mrpl-34 PE=1 SV=1 - [O02220_CAEEL]	29.56	8.99	1	1	54.81	6.35	1	1	118.21	15.34	2	3	1.54
Q17389	cul-1	Cullin-1 OS=Caenorhabditis elegans GN=cul-1 PE=1 SV=1 - [CUL1_CAEEL]	43.71	2.69	2	2	24.48	1.15	1	1	82.9143	5.38	4	4	1.54
O61856	T26C12.1	Acetolactate synthase-like protein OS=Caenorhabditis elegans GN=T26C12.1 PE=3 SV=2 - [ILVBL_CAEEL]	34.1116	2.5	2	2	25.51	1.09	1	1	66.34	7.19	4	4	1.54
O16303	dnj-19	DNaJ domain (Prokaryotic heat shock protein) OS=Caenorhabditis elegans GN=dnj-19 PE=1 SV=1 - [O16303_CAEEL]	50.63	5.24	2	2	26.56	2.51	1	1	114.17	7.74	3	4	1.54
Q21053	vps-35	Vacuolar protein sorting-associated protein 35 OS=Caenorhabditis elegans GN=vps-35 PE=1 SV=3 - [Q21053_CAEEL]	96.375	2.92	2	2	66.13	1.83	1	1	42.71	4.99	4	4	1.54
Q23494	CELE_ZK430.7	Uncharacterized protein OS=Caenorhabditis elegans GN=CELE_ZK430.7 PE=1 SV=1 - [Q23494_CAEEL]	83.94	5.86	2	2	33.7	1.8	1	1	96.27	11.04	3	4	1.54
O62477	CELE_Y45F10D.7	Uncharacterized protein OS=Caenorhabditis elegans GN=CELE_Y45F10D.7 PE=1 SV=6 - [O62477_CAEEL]	86.83	2.81	2	2	51.58	1.52	1	1	118.43	5.09	4	4	1.54
Q95QL2	mrpl-13	Mitochondrial Ribosomal Protein, Large OS=Caenorhabditis elegans GN=mrpl-13 PE=1 SV=1 - [Q95QL2_CAEEL]	38.63	14.15	2	2	38.3	3.41	1	1	59.4	12.68	3	4	1.54
Q18445	cyn-12	Peptidyl-prolyl cis-trans isomerase OS=Caenorhabditis elegans GN=cyn-12 PE=1 SV=1 - [Q18445_CAEEL]	128	10.06	1	2	40.4	10.06	1	1	143.53	27.22	3	4	1.54
Q9GRE9	#VALUE!	Alpha tubulin (Tba-6) (Fragment) OS=Caenorhabditis elegans PE=2 SV=1 - [Q9GRE9_CAEEL]	67.539	9.43	4	4	72.1846	2.76	3	5	225.12	14.25	6	11	1.54
P09588	his-3	Histone H2A OS=Caenorhabditis elegans GN=his-3 PE=1 SV=2 - [H2A_CAEEL]	167.32	18.11	3	13	419.688	36.22	4	14	1403.57	36.22	6	31	1.54
O76371	rpt-5	Proteasome Regulatory Particle, ATPase-like OS=Caenorhabditis elegans GN=rpt-5 PE=1 SV=1 - [O76371_CAEEL]	405.703	29.07	9	15	217.95	19.3	7	10	719.716	41.63	15	28	1.54
Q23451	rad-23	Uncharacterized protein OS=Caenorhabditis elegans GN=rad-23 PE=1 SV=2 - [Q23451_CAEEL]		0			62.78	7.12	1	1	102.93	7.12	1	2	1.53
Q8I7F8	odr-4	Odorant response abnormal protein 4 OS=Caenorhabditis elegans GN=odr-4 PE=1 SV=1 - [ODR4_CAEEL]					25.04	2.32	1	1	60.35	5.05	2	2	1.53
P34423	F44B9.2	Uncharacterized protein F44B9.2 OS=Caenorhabditis elegans GN=F44B9.2 PE=4 SV=1 - [YL32_CAEEL]					26.17	2.98	1	1	86.73	7.16	2	2	1.53
G5EBS4	lst-3	Lateral Signaling Target OS=Caenorhabditis elegans GN=lst-3 PE=1 SV=1 - [G5EBS4_CAEEL]					72.61	2.75	1	1	72.22	4.32	2	2	1.53
O45226	rpl-29	Ribosomal Protein, Large subunit OS=Caenorhabditis elegans GN=rpl-29 PE=1 SV=1 - [O45226_CAEEL]					28.4	11.29	1	1	39.9451	11.29	1	2	1.53
Q8MQ25	CELE_F54D8.6	Uncharacterized protein OS=Caenorhabditis elegans GN=CELE_F54D8.6 PE=1 SV=3 - [Q8MQ25_CAEEL]					34.08	2.14	1	1	73.79	2.14	1	2	1.53
Q8WTJ4	ubxn-6	UBX-containing protein in Nematodes OS=Caenorhabditis elegans GN=ubxn-6 PE=1 SV=2 - [Q8WTJ4_CAEEL]					59.12	4.35	1	1	29.32	5.72	2	2	1.53
Q19202	apy-1	APYrase OS=Caenorhabditis elegans GN=apy-1 PE=1 SV=2 - [Q19202_CAEEL]					23.71	7.89	1	1	133.01	7.89	2	2	1.53
Q95Y85	pfkb-1.1	Uncharacterized protein OS=Caenorhabditis elegans GN=pfkb-1.1 PE=1 SV=1 - [Q95Y85_CAEEL]					23	4.37	1	1	46.9	6.21	2	2	1.53
G5EFG0	sel-1	SEL-1 OS=Caenorhabditis elegans GN=sel-1 PE=1 SV=1 - [G5EFG0_CAEEL]					43.79	1.61	1	1	55.18	2.77	2	2	1.53
O44156	pas-6	Proteasome subunit alpha type-1 OS=Caenorhabditis elegans GN=pas-6 PE=1 SV=1 - [PSA1_CAEEL]					73.61	5.77	1	1	80.97	9.62	2	2	1.53
M1Z882	npp-8	Nuclear Pore complex Protein OS=Caenorhabditis elegans GN=npp-8 PE=1 SV=1 - [M1Z882_CAEEL]					0	4.79	1	1	66.38	6.65	2	2	1.53
H2L0K0	aakg-4	AMP-Activated protein Kinase Gamma subunit OS=Caenorhabditis elegans GN=aakg-4 PE=1 SV=1 - [H2L0K0_CAEEL]					53.41	2.8	1	1	83.57	6.24	2	2	1.53
Q09364	ZK1320.2	Uncharacterized protein ZK1320.2 OS=Caenorhabditis elegans GN=ZK1320.2 PE=1 SV=1 - [YS22_CAEEL]					33.25	8.65	1	1	30.97	8.65	1	2	1.53
Q9N3F3	mrpl-17	Mitochondrial Ribosomal Protein, Large OS=Caenorhabditis elegans GN=mrpl-17 PE=1 SV=2 - [Q9N3F3_CAEEL]					26.99	6.7	1	1	48.8	6.7	1	2	1.53
Q93233	pabp-2	PolyA Binding Protein (Nuclear) OS=Caenorhabditis elegans GN=pabp-2 PE=1 SV=1 - [Q93233_CAEEL]					23.73	12.2	1	1	48.62	12.2	2	2	1.53
P34563	iff-1	Eukaryotic translation initiation factor 5A-1 OS=Caenorhabditis elegans GN=iff-1 PE=1 SV=1 - [IF5A1_CAEEL]	107.22	14.29	2	4	106.547	25.47	3	6	396.69	42.24	4	12	1.52
G3MU81	math-33	Ubiquitin carboxyl-terminal hydrolase OS=Caenorhabditis elegans GN=math-33 PE=1 SV=1 - [G3MU81_CAEEL]	103.93	5.14	5	5	141.593	7.62	6	6	368.216	11.96	10	13	1.52
O01504	rpa-2	60S acidic ribosomal protein P2 OS=Caenorhabditis elegans GN=rpa-2 PE=3 SV=2 - [RLA2_CAEEL]	293.28	49.53	4	8	94.37	30.84	2	2	482.235	78.5	7	11	1.52
Q19952	lsm-4	Probable U6 snRNA-associated Sm-like protein LSm4 OS=Caenorhabditis elegans GN=lsm-4 PE=3 SV=1 - [LSM4_CAEEL]	46.8667	14.63	2	3	83.2967	26.83	4	6	140.218	32.52	5	11	1.51
G5EDS2	pod-1	POD-1 OS=Caenorhabditis elegans GN=pod-1 PE=1 SV=1 - [G5EDS2_CAEEL]	54.52	5.87	5	5	40.68	1.51	2	2	113.666	6.91	7	8	1.51
Q9XWS6	CELE_Y62H9A.5	Uncharacterized protein OS=Caenorhabditis elegans GN=CELE_Y62H9A.5 PE=1 SV=2 - [Q9XWS6_CAEEL]	108.41	14.55	2	5	60.21	6.67	1	2	164.875	23.03	4	8	1.51
Q22307	rha-1	Probable ATP-dependent RNA helicase A OS=Caenorhabditis elegans GN=rha-1 PE=2 SV=3 - [DHX9_CAEEL]	160.918	5.69	8	8	133.83	4.53	7	7	267.773	11.99	15	17	1.51
Q20363	sip-1	Stress-induced protein 1 OS=Caenorhabditis elegans GN=sip-1 PE=1 SV=1 - [SIP1_CAEEL]	461.787	63.52	8	15	156.125	40.25	6	8	878.87	71.07	9	25	1.51
P37165	ubl-1	Ubiquitin-like protein 1-40S ribosomal protein S27a OS=Caenorhabditis elegans GN=ubl-1 PE=1 SV=2 - [RS27A_CAEEL]	87.68	21.47	3	4	94.19	17.18	2	2	359.004	28.83	3	7	1.5
Q9N362	CELE_Y55F3AM.13	Uncharacterized protein OS=Caenorhabditis elegans GN=CELE_Y55F3AM.13 PE=1 SV=1 - [Q9N362_CAEEL]	122.72	10.17	3	4	61.34	7.91	2	2	167.047	16.67	5	7	1.5
O45181	CELE_K07H8.10	Uncharacterized protein OS=Caenorhabditis elegans GN=CELE_K07H8.10 PE=1 SV=1 - [O45181_CAEEL]	1817.89	17.29	21	59	1507.95	17.92	23	54	4198.12	30.58	34	123	1.5
Q9U2M4	Y38F1A.6	Probable hydroxyacid-oxoacid transhydrogenase, mitochondrial OS=Caenorhabditis elegans GN=Y38F1A.6 PE=3 SV=1 - [HOT_CAEEL]	179.83	22.58	5	7	93.6567	9.25	3	3	280.051	29.03	7	11	1.49
P52814	rpl-39	60S ribosomal protein L39 OS=Caenorhabditis elegans GN=rpl-39 PE=3 SV=1 - [RL39_CAEEL]	35.63	19.61	1	2	38.41	19.61	1	2	104.75	19.61	1	5	1.48
P49197	rps-21	40S ribosomal protein S21 OS=Caenorhabditis elegans GN=rps-21 PE=1 SV=1 - [RS21_CAEEL]	153.03	20.45	1	2	143.46	20.45	1	2	221.53	44.32	3	5	1.48
O16521	hpo-19	NADH-cytochrome b5 reductase OS=Caenorhabditis elegans GN=hpo-19 PE=1 SV=1 - [O16521_CAEEL]	46.68	10.03	2	2	52.36	10.03	2	2	177.45	17.48	4	5	1.48
Q10021	rsp-5	Probable splicing factor, arginine/serine-rich 5 OS=Caenorhabditis elegans GN=rsp-5 PE=3 SV=3 - [RSP5_CAEEL]	64.45	9.13	2	2	29.19	6.73	2	2	32.8991	10.1	3	5	1.48
Q18476	C35A5.8	Uncharacterized protein OS=Caenorhabditis elegans GN=C35A5.8 PE=1 SV=3 - [Q18476_CAEEL]	78.92	2.01	2	2	72.83	2.01	2	2	101.181	4.38	5	5	1.48
Q9N5B3	CELE_W08E12.7	Uncharacterized protein OS=Caenorhabditis elegans GN=CELE_W08E12.7 PE=1 SV=1 - [Q9N5B3_CAEEL]	123.942	15.35	5	5	54.3933	12.28	3	3	249.614	29.41	7	9	1.48
P34339	egl-45	Eukaryotic translation initiation factor 3 subunit A OS=Caenorhabditis elegans GN=egl-45 PE=3 SV=1 - [EIF3A_CAEEL]	634.243	16.82	16	26	296.762	13.1	12	14	1246.97	23.61	23	42	1.48
P52274	tba-8	Tubulin alpha-8 chain OS=Caenorhabditis elegans GN=tba-8 PE=3 SV=2 - [TBA8_CAEEL]	390.533	19.47	6	12	279.55	4.65	1	5	778.611	17.48	5	18	1.48
Q7JKP6	hsr-9	Uncharacterized protein OS=Caenorhabditis elegans GN=hsr-9 PE=1 SV=1 - [Q7JKP6_CAEEL]	49.3	1.29	1	1	77.36	1.29	1	2	97.47	3	3	4	1.47
P90780	sdz-8	SKN-1 Dependent Zygotic transcript OS=Caenorhabditis elegans GN=sdz-8 PE=1 SV=1 - [P90780_CAEEL]	41.78	4.8	1	1	107.18	12.4	2	2	166.44	28.8	4	4	1.47
Q09610	lec-8	Probable galaptin lec-8 OS=Caenorhabditis elegans GN=lec-8 PE=2 SV=2 - [LEC8_CAEEL]	204.65	15.56	2	4	142.18	15.56	2	3	381.825	15.56	2	8	1.47
Q688Z6	atln-1	ATLastiN (Endoplasmic reticulum GTPase) related OS=Caenorhabditis elegans GN=atln-1 PE=1 SV=1 - [Q688Z6_CAEEL]	79.37	8.04	4	4	59.14	6.54	3	3	212.43	13.46	7	8	1.47
Q21182	CELE_K03B8.6	Uncharacterized protein OS=Caenorhabditis elegans GN=CELE_K03B8.6 PE=1 SV=2 - [Q21182_CAEEL]	72.7	9.67	3	4	50.9167	6.65	2	3	195.285	19.34	5	8	1.47
G5ECU1	skr-1	Skp1-related protein OS=Caenorhabditis elegans GN=skr-1 PE=1 SV=1 - [SKR1_CAEEL]	181.358	14.77	2	3	134.487	16.48	3	3	310.424	35.8	3	7	1.46
Q8IA49	mdh-1	Malate dehydrogenase OS=Caenorhabditis elegans GN=mdh-1 PE=1 SV=1 - [Q8IA49_CAEEL]	136.781	12.45	2	3	138.117	10.26	2	3	173.797	22.71	5	7	1.46
P34433	F44E2.3	Uncharacterized protein F44E2.3 OS=Caenorhabditis elegans GN=F44E2.3 PE=4 SV=1 - [YL53_CAEEL]					60.14	7.79	2	2	75.47	8.2	2	3	1.45
Q09476	pxl-1	Paxillin homolog 1 OS=Caenorhabditis elegans GN=pxl-1 PE=2 SV=2 - [PXL1_CAEEL]					142.17	3.63	1	2	110.677	8.72	3	3	1.45
Q93545	CELE_F20G2.2	Uncharacterized protein OS=Caenorhabditis elegans GN=CELE_F20G2.2 PE=1 SV=1 - [Q93545_CAEEL]					20.21	12.05	2	2	33.55	18.07	3	3	1.45
P53589	sucg-1	Succinyl-CoA ligase [GDP-forming] subunit beta, mitochondrial OS=Caenorhabditis elegans GN=sucg-1 PE=3 SV=1 - [SUCB2_CAEEL]	47.42	4.82	2	2	64.4633	7.95	3	3	139.483	20.48	6	6	1.44
O44451	pdhb-1	Pyruvate dehydrogenase E1 component subunit beta, mitochondrial OS=Caenorhabditis elegans GN=pdhb-1 PE=1 SV=2 - [ODPB_CAEEL]	183.575	20.45	5	6	155.99	23.01	5	5	338.408	28.13	7	12	1.44
Q22537	CELE_T17H7.1	Uncharacterized protein OS=Caenorhabditis elegans GN=CELE_T17H7.1 PE=1 SV=1 - [Q22537_CAEEL]	238.995	18.91	5	8					303.364	15.4	5	8	1.44
O44954	sdha-2	Succinate dehydrogenase [ubiquinone] flavoprotein subunit, mitochondrial OS=Caenorhabditis elegans GN=sdha-2 PE=1 SV=1 - [O44954_CAEEL]	189.84	7.19	4	8	152.777	8.13	4	6	422.367	13.59	7	15	1.44
P52011	cyn-3	Peptidyl-prolyl cis-trans isomerase 3 OS=Caenorhabditis elegans GN=cyn-3 PE=1 SV=1 - [CYP3_CAEEL]	65.4	8.09	1	1	122.397	15.03	2	3	162.24	20.81	3	5	1.43
O61820	eif-3.E	Eukaryotic translation initiation factor 3 subunit E OS=Caenorhabditis elegans GN=eif-3.E PE=3 SV=1 - [EIF3E_CAEEL]	158.649	14.35	5	7					109.659	18.06	6	7	1.43
O16518	alh-4	Aldehyde dehydrogenase OS=Caenorhabditis elegans GN=alh-4 PE=1 SV=2 - [O16518_CAEEL]	154.797	8.52	4	5	150.73	11.56	5	5	326.13	19.47	9	11	1.43
P46502	rpt-3	Probable 26S protease regulatory subunit 6B OS=Caenorhabditis elegans GN=rpt-3 PE=3 SV=1 - [PRS6B_CAEEL]	473.422	30.92	10	17	340.26	30.92	9	12	1017.58	48.07	14	30	1.43
Q09422	pgam-5	Serine/threonine-protein phosphatase Pgam5, mitochondrial OS=Caenorhabditis elegans GN=pgam-5 PE=3 SV=2 - [PGAM5_CAEEL]	571.627	33.45	9	24	620.646	40.14	10	23	1169.37	62.68	16	49	1.42
P10567	unc-15	Paramyosin OS=Caenorhabditis elegans GN=unc-15 PE=1 SV=1 - [MYSP_CAEEL]	782.122	19.05	13	27	614.491	19.84	13	20	1429.09	37.3	25	48	1.42
Q86S80	rme-1	Receptor Mediated Endocytosis OS=Caenorhabditis elegans GN=rme-1 PE=1 SV=1 - [Q86S80_CAEEL]	325.773	14.05	6	11	244.614	12.97	6	9	622.696	25.95	12	21	1.42
Q27464	gspd-1	Glucose-6-phosphate 1-dehydrogenase OS=Caenorhabditis elegans GN=gspd-1 PE=3 SV=1 - [G6PD_CAEEL]	117.85	12.07	5	5	274.27	23.56	10	12	441.527	34.67	14	19	1.42
V6CM19	col-45	COLlagen OS=Caenorhabditis elegans GN=col-45 PE=4 SV=1 - [V6CM19_CAEEL]	389.511	13.18	3	9	87.24	4.65	1	2	598.202	22.48	4	11	1.41
Q21215	rack-1	Guanine nucleotide-binding protein subunit beta-2-like 1 OS=Caenorhabditis elegans GN=rack-1 PE=1 SV=3 - [GBLP_CAEEL]	850.581	46.77	12	29	728.391	44.31	11	23	1926.38	82.77	22	53	1.41
G5EEH6	ivd-1	IsoValeryl-CoA Dehydrogenase OS=Caenorhabditis elegans GN=ivd-1 PE=1 SV=1 - [G5EEH6_CAEEL]	379.34	21.96	8	12	151.92	15.51	4	4	687.479	37.95	10	16	1.41
Q20306	abcf-3	ABC transporter, class F OS=Caenorhabditis elegans GN=abcf-3 PE=1 SV=1 - [Q20306_CAEEL]	186.33	6.04	3	4	201.237	9.55	5	6	319.987	15.59	9	11	1.4
O44729	prp-17	Yeast PRP (Splicing factor) related OS=Caenorhabditis elegans GN=prp-17 PE=1 SV=2 - [O44729_CAEEL]	125.845	15.17	8	9	69.1222	4.94	3	3	308.753	17.28	8	12	1.4
Q9N4Z0	Y45G12B.3	L-2-hydroxyglutarate dehydrogenase, mitochondrial OS=Caenorhabditis elegans GN=Y45G12B.3 PE=3 SV=2 - [L2HDH_CAEEL]	162.91	11.55	3	5					225.352	17.09	5	5	1.39
Q8MQC1	C25H3.7	Uncharacterized protein OS=Caenorhabditis elegans GN=C25H3.7 PE=1 SV=1 - [Q8MQC1_CAEEL]	93.4943	21.09	5	7	44.2836	6.18	2	2	220.886	27.64	6	9	1.39
Q95QR5	C44B7.2	Uncharacterized protein OS=Caenorhabditis elegans GN=C44B7.2 PE=1 SV=2 - [Q95QR5_CAEEL]	661.951	23.12	14	24	1078.39	22.28	15	40	1987.61	43.38	22	67	1.39
Q9TXP0	rps-27	40S ribosomal protein S27 OS=Caenorhabditis elegans GN=rps-27 PE=1 SV=3 - [RS27_CAEEL]	282.623	44.58	4	7	356.649	36.14	4	11	574.534	48.19	6	19	1.38
Q22253	rpn-9	Proteasome Regulatory Particle, Non-ATPase-like OS=Caenorhabditis elegans GN=rpn-9 PE=1 SV=1 - [Q22253_CAEEL]	379.22	32.3	9	12	239.741	23.51	6	7	539.256	40.57	12	19	1.38
Q93353	idhb-1	Probable isocitrate dehydrogenase [NAD] subunit beta, mitochondrial OS=Caenorhabditis elegans GN=idhb-1 PE=3 SV=1 - [IDH3B_CAEEL]	542.202	40.63	12	18	789.918	43.01	14	32	1774.03	50.13	18	52	1.37
Q17770	pdi-2	Protein disulfide-isomerase 2 OS=Caenorhabditis elegans GN=pdi-2 PE=1 SV=1 - [PDI2_CAEEL]	198.475	24.54	11	14	153.44	20.49	9	11	454.279	37.93	18	25	1.37
P30642	eif-3.D	Eukaryotic translation initiation factor 3 subunit D OS=Caenorhabditis elegans GN=eif-3.D PE=1 SV=1 - [EIF3D_CAEEL]	542.32	28.95	12	19	276.807	15.96	8	10	803.976	28.77	14	28	1.36
P34466	clu-1	Clustered mitochondria protein homolog OS=Caenorhabditis elegans GN=clu-1 PE=3 SV=1 - [CLU_CAEEL]	423.442	16.36	17	19	226.28	7.94	10	10	706.481	23.02	23	28	1.36
Q95Q06	CELE_Y66D12A.8	Uncharacterized protein OS=Caenorhabditis elegans GN=CELE_Y66D12A.8 PE=1 SV=2 - [Q95Q06_CAEEL]					184.58	28.28	4	5	267.42	25	4	6	1.35
P91189	dnj-7	DNaJ domain (Prokaryotic heat shock protein) OS=Caenorhabditis elegans GN=dnj-7 PE=1 SV=1 - [P91189_CAEEL]	160.16	9.57	4	5	46.45	4.07	2	2	246.66	13.24	5	7	1.35
O45148	dlst-1	DihydroLipoamide S-SuccinylTransferase OS=Caenorhabditis elegans GN=dlst-1 PE=1 SV=2 - [O45148_CAEEL]	468.209	13.17	5	11	166.328	15.12	6	10	771.026	31.32	10	21	1.35
G5EDY2	wars-1	Tryptophanyl(W) Amino-acyl tRNA Synthetase OS=Caenorhabditis elegans GN=wars-1 PE=1 SV=1 - [G5EDY2_CAEEL]	215.72	24.22	9	11					292.56	29.98	9	10	1.35
Q21902	mcm-5	DNA replication licensing factor mcm-5 OS=Caenorhabditis elegans GN=mcm-5 PE=3 SV=1 - [MCM5_CAEEL]	55.49	6.98	4	4	29.53	1.98	1	1	125.92	7.51	5	5	1.34
Q02335	ZK370.8	TPR repeat-containing protein ZK370.8 OS=Caenorhabditis elegans GN=ZK370.8 PE=4 SV=3 - [YOL8_CAEEL]	68.7233	5.1	3	4	30.46	1.93	1	1	65.8	9.84	5	5	1.34
P91341	F55F8.3	Periodic tryptophan protein 2 homolog OS=Caenorhabditis elegans GN=F55F8.3 PE=3 SV=2 - [PWP2_CAEEL]	44.22	2.97	3	4	34.93	0.77	1	1	73.9765	6.59	5	5	1.34
Q18035	C16A3.6	Uncharacterized protein OS=Caenorhabditis elegans GN=C16A3.6 PE=1 SV=1 - [Q18035_CAEEL]	132.16	13	3	4	56.42	5.26	1	1	145.74	13	3	5	1.34
P48158	rpl-23	60S ribosomal protein L23 OS=Caenorhabditis elegans GN=rpl-23 PE=3 SV=1 - [RL23_CAEEL]	396.893	50.71	8	15	473.313	70.71	10	21	1286.99	71.43	13	36	1.33
P49041	rps-5	40S ribosomal protein S5 OS=Caenorhabditis elegans GN=rps-5 PE=3 SV=1 - [RS5_CAEEL]	416.071	33.81	7	17	535.857	33.81	6	15	1166.03	37.62	9	31	1.33
P90901	ifa-1	Intermediate filament protein ifa-1 OS=Caenorhabditis elegans GN=ifa-1 PE=1 SV=2 - [IFA1_CAEEL]	151.856	15.3	8	10	202.754	20.7	12	12	451.701	31.65	16	22	1.33
P91175	C50F2.3	Uncharacterized protein OS=Caenorhabditis elegans GN=C50F2.3 PE=1 SV=1 - [P91175_CAEEL]	197.82	11.7	10	11	49.29	3.51	3	3	260.293	15.44	12	13	1.33
Q09510	mlc-4	Myosin regulatory light chain OS=Caenorhabditis elegans GN=mlc-4 PE=1 SV=1 - [MLRH_CAEEL]	89.67	15.7	2	3					84.0833	11.63	2	3	1.32
Q95Y71	mrpl-45	Probable 39S ribosomal protein L45, mitochondrial OS=Caenorhabditis elegans GN=mrpl-45 PE=3 SV=3 - [RM45_CAEEL]	71.9367	8.68	3	3					93.18	7.28	3	3	1.32
Q18880	grl-17	GRound-Like (Grd related) OS=Caenorhabditis elegans GN=grl-17 PE=1 SV=1 - [Q18880_CAEEL]	152.623	4.07	2	3					178.207	4.07	2	3	1.32
Q23449	rpn-12	26S proteasome non-ATPase regulatory subunit 8 OS=Caenorhabditis elegans GN=rpn-12 PE=3 SV=1 - [PSMD8_CAEEL]	110.74	12	3	4	58.07	9.6	2	2	173.75	23.6	5	6	1.32
O02267	CELE_F45H10.3	Uncharacterized protein OS=Caenorhabditis elegans GN=CELE_F45H10.3 PE=1 SV=1 - [O02267_CAEEL]	96.7661	24.4	4	4	55.76	11.31	2	2	111.874	36.9	5	6	1.32
H2KYJ5	mtch-1	MiTochondrial Carrier Homolog OS=Caenorhabditis elegans GN=mtch-1 PE=1 SV=1 - [H2KYJ5_CAEEL]	144.457	11.99	3	4	102.45	8.77	2	2	203.691	21.93	4	6	1.32
Q18218	mmab-1	MethylMalonic Aciduria type B homolog OS=Caenorhabditis elegans GN=mmab-1 PE=1 SV=2 - [Q18218_CAEEL]	208.492	13.08	2	5	206.092	13.08	2	4	339.677	36.92	7	9	1.32
Q09497	rsu-1	Ras SUppressor homolog OS=Caenorhabditis elegans GN=rsu-1 PE=1 SV=1 - [Q09497_CAEEL]	391.426	44.4	8	15	334.477	37.69	7	12	838.15	47.76	10	26	1.32
O61931	ergo-1	Piwi-like protein ergo-1 OS=Caenorhabditis elegans GN=ergo-1 PE=1 SV=2 - [ERGO1_CAEEL]	35.91	2.32	3	3	36.69	1.61	1	1	38.43	4.28	4	4	1.31
Q9N5Y2	art-1	Probable very-long-chain enoyl-CoA reductase art-1 OS=Caenorhabditis elegans GN=art-1 PE=3 SV=1 - [TECR_CAEEL]	37.5333	12.66	3	3	29.49	3.57	1	1	182.47	12.34	3	4	1.31
Q9NEI6	mrps-35	Mitochondrial Ribosomal Protein, Small OS=Caenorhabditis elegans GN=mrps-35 PE=1 SV=1 - [Q9NEI6_CAEEL]	61.3433	5.75	2	3	34.95	1.92	1	1	94.7	10.96	4	4	1.31
Q6A582	zbp-1	Zipcode Binding Protein homolog OS=Caenorhabditis elegans GN=zbp-1 PE=1 SV=1 - [Q6A582_CAEEL]	77.24	5.82	4	5	184.45	11.22	5	6	308.931	15.77	7	11	1.31
P34575	cts-1	Probable citrate synthase, mitochondrial OS=Caenorhabditis elegans GN=cts-1 PE=3 SV=1 - [CISY_CAEEL]	262.113	15.38	6	10	62.5967	5.77	3	3	329.99	23.29	8	12	1.31
Q86GU1	hsp-25	Heat Shock Protein OS=Caenorhabditis elegans GN=hsp-25 PE=1 SV=1 - [Q86GU1_CAEEL]	126.74	21.46	4	4	97.4554	18.54	4	4	207.41	40	5	8	1.3
Q18685	unc-112	Protein unc-112 OS=Caenorhabditis elegans GN=unc-112 PE=1 SV=1 - [UN112_CAEEL]	111.142	6.67	5	5	124.214	8.19	6	8	334.481	15.14	10	13	1.3
O62512	CELE_ZK550.3	Uncharacterized protein OS=Caenorhabditis elegans GN=CELE_ZK550.3 PE=1 SV=3 - [O62512_CAEEL]	87.57	4.27	4	4	157.987	7.25	5	6	207.851	16.84	10	10	1.29
H2KZG6	acdh-1	Acyl CoA DeHydrogenase OS=Caenorhabditis elegans GN=acdh-1 PE=1 SV=1 - [H2KZG6_CAEEL]	298.79	21.55	7	10	154.284	17.1	5	6	412.449	32.55	11	15	1.29
Q9XU97	CELE_F44E5.1	Uncharacterized protein OS=Caenorhabditis elegans GN=CELE_F44E5.1 PE=1 SV=1 - [Q9XU97_CAEEL]	69.8433	30.77	3	3	107.31	30.77	3	4	167.233	44.87	5	7	1.28
Q86S40	C50D2.7	Probable ADP-dependent glucokinase OS=Caenorhabditis elegans GN=C50D2.7 PE=1 SV=1 - [ADPGK_CAEEL]	96.5767	7.77	3	3	113.45	7.97	4	4	244.323	15.74	5	7	1.28
Q19057	acdh-12	Acyl CoA DeHydrogenase OS=Caenorhabditis elegans GN=acdh-12 PE=1 SV=1 - [Q19057_CAEEL]	592.106	26.92	13	22	433.287	25.77	12	15	1035.96	38.17	19	34	1.28
Q09996	lrs-1	Leucine--tRNA ligase OS=Caenorhabditis elegans GN=lrs-1 PE=3 SV=2 - [SYLC_CAEEL]	182.94	7.25	8	10	212.111	8.35	9	9	330.391	13.66	14	18	1.28
P34462	vha-14	V-type proton ATPase subunit D OS=Caenorhabditis elegans GN=vha-14 PE=3 SV=1 - [VATD_CAEEL]	387.223	43.19	7	14	174.19	18.68	2	3	521.813	50.19	8	15	1.28
P54816	lex-1	Tat-binding homolog 7 OS=Caenorhabditis elegans GN=lex-1 PE=1 SV=3 - [TBP7_CAEEL]	58.95	1.63	2	2		0			55.8	1.86	2	2	1.27
P91001	csn-5	COP9 signalosome complex subunit 5 OS=Caenorhabditis elegans GN=csn-5 PE=1 SV=1 - [CSN5_CAEEL]	36.9	4.08	2	2					53.15	5.71	2	2	1.27
Q20374	patr-1	Protein PAT1 homolog 1 OS=Caenorhabditis elegans GN=patr-1 PE=3 SV=2 - [PATR1_CAEEL]	63.84	2.76	2	2					53.31	2.76	2	2	1.27
O45924	Y39E4A.3	2-oxoisovalerate dehydrogenase subunit alpha, mitochondrial OS=Caenorhabditis elegans GN=Y39E4A.3 PE=1 SV=2 - [ODBA_CAEEL]	52.14	7.89	2	2					24.79	7.42	2	2	1.27
Q07750	unc-60	Actin-depolymerizing factor 1, isoforms a/b OS=Caenorhabditis elegans GN=unc-60 PE=1 SV=2 - [ADF1_CAEEL]	61.23	12.26	2	2					66.72	8.49	2	2	1.27
Q9TW45	par-1	Serine/threonine-protein kinase par-1 OS=Caenorhabditis elegans GN=par-1 PE=1 SV=1 - [PAR1_CAEEL]	105.73	2.6	2	2					44.92	1.93	2	2	1.27
Q8WQH2	B0001.8	Uncharacterized protein OS=Caenorhabditis elegans GN=B0001.8 PE=1 SV=2 - [Q8WQH2_CAEEL]	78.36	5.51	2	2					104.43	5.51	2	2	1.27
G5EBH3	sma-1	SMAll OS=Caenorhabditis elegans GN=sma-1 PE=1 SV=1 - [G5EBH3_CAEEL]	76.48	0.48	2	2		0			94.81	0.58	2	2	1.27
Q93576	ndk-1	Nucleoside diphosphate kinase OS=Caenorhabditis elegans GN=ndk-1 PE=1 SV=1 - [Q93576_CAEEL]	92.19	18.95	2	2					114.64	18.95	2	2	1.27
Q20430	mrpl-14	Mitochondrial Ribosomal Protein, Large OS=Caenorhabditis elegans GN=mrpl-14 PE=1 SV=2 - [Q20430_CAEEL]	80	17.88	2	2					79.82	20.67	2	2	1.27
Q95Q11	mrps-7	28S ribosomal protein S7, mitochondrial OS=Caenorhabditis elegans GN=mrps-7 PE=3 SV=2 - [RT07_CAEEL]	40.97	10.36	2	2					51.44	10.81	2	2	1.27
X5MBG4	nrfl-1	NHERF (Mammalian Na/H Exchange Regulatory Factor) Like OS=Caenorhabditis elegans GN=nrfl-1 PE=1 SV=1 - [X5MBG4_CAEEL]	90.59	5.32	1	2					128.72	11.03	2	2	1.27
G5EE67	skr-3	SKR-3 OS=Caenorhabditis elegans GN=skr-3 PE=1 SV=1 - [G5EE67_CAEEL]	45.02	15.57	2	2					116.93	23.35	2	2	1.27
G5EGU1	egl-30	EGL-30 OS=Caenorhabditis elegans GN=egl-30 PE=1 SV=1 - [G5EGU1_CAEEL]	94.2333	6.2	2	2					59.66	9.01	2	2	1.27
H2KYN3	acdh-13	Acyl CoA DeHydrogenase OS=Caenorhabditis elegans GN=acdh-13 PE=1 SV=1 - [H2KYN3_CAEEL]	40.9	3.08	2	2					42.68	3.24	2	2	1.27
Q20277	fipr-21	FIP (Fungus-Induced Protein) Related OS=Caenorhabditis elegans GN=fipr-21 PE=1 SV=1 - [Q20277_CAEEL]	104.41	24.11	2	2					67.94	24.11	2	2	1.27
Q10123	F52C9.3	Uncharacterized protein F52C9.3 OS=Caenorhabditis elegans GN=F52C9.3 PE=3 SV=2 - [YSM3_CAEEL]	48.44	4.56	2	2					59.13	6.61	2	2	1.27
P80361	ppp-1	Probable translation initiation factor eIF-2B subunit gamma OS=Caenorhabditis elegans GN=ppp-1 PE=2 SV=3 - [EI2BG_CAEEL]	32.8	5.94	2	2					54.73	6.19	2	2	1.27
Q19257	CELE_F09E5.7	Uncharacterized protein OS=Caenorhabditis elegans GN=CELE_F09E5.7 PE=1 SV=1 - [Q19257_CAEEL]	146.022	10.93	2	2					137.358	10.61	2	2	1.27
O44175	rfc-2	RFC (DNA replication factor) family OS=Caenorhabditis elegans GN=rfc-2 PE=1 SV=1 - [O44175_CAEEL]	67.98	2.69	1	2					50.6802	4.79	2	2	1.27
Q10129	mrps-16	Probable 28S ribosomal protein S16, mitochondrial OS=Caenorhabditis elegans GN=mrps-16 PE=3 SV=2 - [RT16_CAEEL]	75.46	24.49	2	2					123.59	24.49	2	2	1.27
Q09652	gstk-1	Glutathione S-transferase kappa 1 OS=Caenorhabditis elegans GN=gstk-1 PE=3 SV=1 - [GSTK1_CAEEL]	28.44	11.06	2	2					41.58	11.5	2	2	1.27
Q965Z4	CELE_ZK105.1	Uncharacterized protein OS=Caenorhabditis elegans GN=CELE_ZK105.1 PE=1 SV=1 - [Q965Z4_CAEEL]	0	7.53	2	2					84.02	10.75	2	2	1.27
Q95PZ4	xpb-1	XPB (Xeroderma Pigmentosum complementation group B) related OS=Caenorhabditis elegans GN=xpb-1 PE=1 SV=1 - [Q95PZ4_CAEEL]	37.17	2.41	2	2		0			43.19	2.28	2	2	1.27
Q7JLH5	pqn-70	Prion-like-(Q/N-rich)-domain-bearing protein OS=Caenorhabditis elegans GN=pqn-70 PE=1 SV=1 - [Q7JLH5_CAEEL]	37.78	4.12	1	2					71.06	11.11	2	2	1.27
Q9TXU7	eif-1.a	Eukaryotic Initiation Factor OS=Caenorhabditis elegans GN=eif-1.a PE=1 SV=1 - [Q9TXU7_CAEEL]	51.93	11.11	2	2					103.04	11.57	2	2	1.27
Q21830	CELE_R07E5.4	Uncharacterized protein OS=Caenorhabditis elegans GN=CELE_R07E5.4 PE=1 SV=2 - [Q21830_CAEEL]	75.2	7.53	1	2					93.02	20.43	2	2	1.27
Q09607	gst-36	Probable glutathione S-transferase gst-36 OS=Caenorhabditis elegans GN=gst-36 PE=3 SV=2 - [GST36_CAEEL]	95.48	21.9	3	3	220.477	25.71	4	6	384.667	33.81	5	9	1.27
P53014	mlc-3	Myosin, essential light chain OS=Caenorhabditis elegans GN=mlc-3 PE=3 SV=1 - [MLE_CAEEL]	295.303	67.32	10	14	260.302	73.2	9	11	531.034	84.97	13	23	1.27
Q22781	acdh-7	Acyl CoA DeHydrogenase OS=Caenorhabditis elegans GN=acdh-7 PE=1 SV=2 - [Q22781_CAEEL]	401.164	29.85	7	9	483.201	30.83	7	10	858.123	41.26	11	18	1.27
Q21742	CELE_R05F9.6	Uncharacterized protein OS=Caenorhabditis elegans GN=CELE_R05F9.6 PE=1 SV=1 - [Q21742_CAEEL]	292.618	15.67	6	9	219.615	17.25	8	9	545.908	28.7	13	17	1.27
P48727	gsp-2	Serine/threonine-protein phosphatase PP1-beta OS=Caenorhabditis elegans GN=gsp-2 PE=2 SV=1 - [GLC7B_CAEEL]	100.51	11.71	4	4	262.504	19.52	6	10	502.13	26.43	9	14	1.27
Q21732	CELE_R04F11.2	Uncharacterized protein OS=Caenorhabditis elegans GN=CELE_R04F11.2 PE=1 SV=1 - [Q21732_CAEEL]	195.16	42.06	4	8	148.02	24.3	3	5	387.11	70.09	6	12	1.27
P54216	aldo-1	Fructose-bisphosphate aldolase 1 OS=Caenorhabditis elegans GN=aldo-1 PE=1 SV=1 - [ALF1_CAEEL]	250.75	29.78	6	8	93.01	13.93	4	4	320.352	31.69	9	11	1.27
P41877	isw-1	Chromatin-remodeling complex ATPase chain isw-1 OS=Caenorhabditis elegans GN=isw-1 PE=1 SV=2 - [ISW1_CAEEL]	48.32	1.88	2	2	33.11	0.99	1	1	70.5167	2.68	3	3	1.26
P34647	mcm-6	DNA replication licensing factor mcm-6 OS=Caenorhabditis elegans GN=mcm-6 PE=1 SV=1 - [MCM6_CAEEL]	43.3874	2.1	2	2	0	0.86	1	1	47.37	3.09	3	3	1.26
P91353	mrpl-24	Probable 39S ribosomal protein L24, mitochondrial OS=Caenorhabditis elegans GN=mrpl-24 PE=1 SV=1 - [RM24_CAEEL]	62.76	14.39	2	2	42.61	4.68	1	1	88.41	14.39	2	3	1.26
Q19266	pkc-3	Protein kinase C-like 3 OS=Caenorhabditis elegans GN=pkc-3 PE=1 SV=1 - [KPC3_CAEEL]	21.58	2.68	2	2	45.71	1.51	1	1	61.5564	4.52	3	3	1.26
Q9U203	CELE_Y57G11C.9	Uncharacterized protein OS=Caenorhabditis elegans GN=CELE_Y57G11C.9 PE=1 SV=1 - [Q9U203_CAEEL]	87.09	1.81	1	2	27.72	1.27	1	1	75.5333	3.07	2	3	1.26
Q9N4K0	F54A3.5	MICOS complex subunit Mic10 OS=Caenorhabditis elegans GN=F54A3.5 PE=3 SV=2 - [MIC10_CAEEL]	33.52	21.9	1	2	21.97	21.9	1	1	88.58	33.33	2	3	1.26
Q22792	CELE_T25G3.3	Uncharacterized protein OS=Caenorhabditis elegans GN=CELE_T25G3.3 PE=1 SV=2 - [Q22792_CAEEL]	70.65	2.92	1	2	68.54	2.92	1	1	97.0333	6.82	3	3	1.26
Q7JPE4	tat-4	Transbilayer Amphipath Transporters (Subfamily IV P-type ATPase) OS=Caenorhabditis elegans GN=tat-4 PE=1 SV=1 - [Q7JPE4_CAEEL]	56.65	11.72	2	2	56.87	7.11	1	1	114.923	17.57	3	3	1.26
Q8I4B4	ccr-4	CCR (Yeast CCR4/NOT complex component) homolog OS=Caenorhabditis elegans GN=ccr-4 PE=1 SV=1 - [Q8I4B4_CAEEL]	45.67	4.69	2	2	56.69	2.85	1	1	130.133	6.03	3	3	1.26
Q95Y13	npp-8	Nuclear Pore complex Protein OS=Caenorhabditis elegans GN=npp-8 PE=1 SV=1 - [Q95Y13_CAEEL]	42.95	4.14	2	2	22.82	1.95	1	1	112.137	9.98	3	3	1.26
Q04908	rpn-3	26S proteasome non-ATPase regulatory subunit 3 OS=Caenorhabditis elegans GN=rpn-3 PE=1 SV=1 - [PSMD3_CAEEL]	740.06	33.53	16	24	327.024	20.83	10	11	831.402	43.45	19	31	1.26
Q09543	paa-1	Probable serine/threonine-protein phosphatase PP2A regulatory subunit OS=Caenorhabditis elegans GN=paa-1 PE=3 SV=2 - [2AAA_CAEEL]	291.053	17.12	10	13	190.02	12.03	7	8	368.768	25.08	13	19	1.26
Q7YXB9	maph-1.1	Microtubule-Associated Protein Homolog OS=Caenorhabditis elegans GN=maph-1.1 PE=1 SV=1 - [Q7YXB9_CAEEL]	166.857	10.34	6	8	170.517	6.41	4	6	376.069	17.67	8	13	1.26
Q9N4M4	anc-1	Nuclear anchorage protein 1 OS=Caenorhabditis elegans GN=anc-1 PE=1 SV=3 - [ANC1_CAEEL]	91.83	0.3	2	2	111.16	0.33	2	2	146.9	0.47	3	4	1.25
Q23651	elpc-3	Probable elongator complex protein 3 OS=Caenorhabditis elegans GN=elpc-3 PE=3 SV=2 - [ELP3_CAEEL]	45.8	4.2	2	2	79.13	4.2	2	2	93.8	5.67	3	4	1.25
Q20121	acs-4	Fatty Acid CoA Synthetase family OS=Caenorhabditis elegans GN=acs-4 PE=1 SV=2 - [Q20121_CAEEL]	40.1	2.74	2	2	32.16	2.19	2	2	130.8	5.06	3	4	1.25
O18236	nuo-3	NADH Ubiquinone Oxidoreductase OS=Caenorhabditis elegans GN=nuo-3 PE=1 SV=1 - [O18236_CAEEL]	40.65	17.56	2	2	37.26	17.56	2	2	62.57	17.56	2	4	1.25
O45011	CELE_W10C8.5	Uncharacterized protein OS=Caenorhabditis elegans GN=CELE_W10C8.5 PE=1 SV=1 - [O45011_CAEEL]	167.99	4.01	1	2	131.55	4.01	1	2	200.73	11.03	3	4	1.25
P34328	hsp-12.2	Heat shock protein Hsp-12.2 OS=Caenorhabditis elegans GN=hsp-12.2 PE=3 SV=1 - [HSP10_CAEEL]	34.45	20.91	2	2	39.6	20.91	2	2	128.58	22.73	3	4	1.25
Q09501	ifp-1	Intermediate filament protein ifp-1 OS=Caenorhabditis elegans GN=ifp-1 PE=3 SV=1 - [IFP1_CAEEL]	108.14	3.74	2	2	103.43	4.64	3	3	314.37	7.99	4	5	1.25
P55954	cco-2	Cytochrome c oxidase subunit 5A, mitochondrial OS=Caenorhabditis elegans GN=cco-2 PE=1 SV=2 - [COX5A_CAEEL]	68.9925	12.64	2	2	60.7033	20.69	3	3	92.3238	22.99	5	5	1.25
Q17994	got-2.2	Aspartate aminotransferase OS=Caenorhabditis elegans GN=got-2.2 PE=1 SV=1 - [Q17994_CAEEL]	139.9	7.25	2	2	147.383	7.25	2	3	195.97	20.05	5	5	1.25
Q9XX18	mrpl-22	Mitochondrial Ribosomal Protein, Large OS=Caenorhabditis elegans GN=mrpl-22 PE=1 SV=1 - [Q9XX18_CAEEL]	67.87	14.62	2	2	73.27	26.54	4	4	193.043	32.69	5	6	1.25
G5ECP2	plrg-1	PLeiotropic ReGulator (Vertebrate) homolog OS=Caenorhabditis elegans GN=plrg-1 PE=1 SV=1 - [G5ECP2_CAEEL]	126.567	17.12	6	7	30.79	4.79	2	2	167.79	19.41	6	8	1.25
P17329	gpd-2	Glyceraldehyde-3-phosphate dehydrogenase 2 OS=Caenorhabditis elegans GN=gpd-2 PE=3 SV=2 - [G3P2_CAEEL]	419.134	39.59	10	14	790.125	47.8	12	23	1292.64	47.8	13	35	1.25
Q20822	srpa-68	Probable signal recognition particle subunit SRP68 OS=Caenorhabditis elegans GN=srpa-68 PE=3 SV=2 - [SRP68_CAEEL]	315.64	11.41	6	12	185.414	11.41	6	7	494.721	23.95	13	17	1.25
Q9N538	dhs-9	DeHydrogenases, Short chain OS=Caenorhabditis elegans GN=dhs-9 PE=1 SV=1 - [Q9N538_CAEEL]	204.873	22.57	7	7	196.1	17.55	5	5	323.152	32.92	9	11	1.25
Q17941	akt-1	Serine/threonine-protein kinase akt-1 OS=Caenorhabditis elegans GN=akt-1 PE=1 SV=2 - [AKT1_CAEEL]	49.58	4.44	2	2	137.413	7.02	4	6	137.835	11.83	6	8	1.24
P18334	kin-3	Casein kinase II subunit alpha OS=Caenorhabditis elegans GN=kin-3 PE=1 SV=1 - [CSK2A_CAEEL]	2044.42	71.11	23	66	1064.72	60	17	35	2916.55	74.72	26	88	1.24
Q9BIC3	ech-1.2	Enoyl-CoA Hydratase OS=Caenorhabditis elegans GN=ech-1.2 PE=1 SV=1 - [Q9BIC3_CAEEL]	903.757	24.64	16	31	558.517	19.6	13	19	1325.71	42.12	24	44	1.24
O44144	perm-4	PERMeable eggshell OS=Caenorhabditis elegans GN=perm-4 PE=1 SV=2 - [O44144_CAEEL]	1362.7	19.34	11	40	255.28	13.9	5	10	1945.16	31.42	13	42	1.24
Q19070	eft-1	Eft-1 protein OS=Caenorhabditis elegans GN=eft-1 PE=4 SV=1 - [Q19070_CAEEL]	646.743	21.91	17	27	499.732	14.25	11	17	898.164	29.33	22	39	1.24
H2KZS3	CELE_T23E7.2	Uncharacterized protein OS=Caenorhabditis elegans GN=CELE_T23E7.2 PE=1 SV=2 - [H2KZS3_CAEEL]	751.329	15.78	12	26	442.632	8.11	7	16	1013.53	20.22	16	37	1.24
Q95YB2	acdh-9	Acyl CoA DeHydrogenase OS=Caenorhabditis elegans GN=acdh-9 PE=1 SV=1 - [Q95YB2_CAEEL]	180.693	19.07	6	6	76.42	6.85	3	4	216.81	19.32	7	9	1.23
Q18599	acer-1	ACEtyl-CoA Regulator OS=Caenorhabditis elegans GN=acer-1 PE=1 SV=3 - [Q18599_CAEEL]	1653.15	72.4	20	46	3252.01	73.04	24	74	5150.61	77.92	28	110	1.23
Q10051	prp-19	Pre-mRNA-processing factor 19 OS=Caenorhabditis elegans GN=prp-19 PE=3 SV=2 - [PRP19_CAEEL]	500.854	30.08	11	20	483.682	27.24	11	18	1059.46	56.1	18	34	1.23
Q9XX35	CELE_Y32B12B.2	Uncharacterized protein OS=Caenorhabditis elegans GN=CELE_Y32B12B.2 PE=1 SV=3 - [Q9XX35_CAEEL]	343.25	12.93	12	19	153.25	7.76	6	7	477.694	13.67	10	22	1.22
P90778	C55A6.3	Uncharacterized protein OS=Caenorhabditis elegans GN=C55A6.3 PE=1 SV=3 - [P90778_CAEEL]	82.18	8.8	1	1	63.28	12	3	3	150.104	24.4	4	4	1.21
Q21276	K07C5.4	Uncharacterized NOP5 family protein K07C5.4 OS=Caenorhabditis elegans GN=K07C5.4 PE=3 SV=1 - [YZVL_CAEEL]	20965	78.4	51	588	10300.5	81.07	45	305	30689.3	82.51	62	756	1.21
O45012	nol-5	NucleOLar protein OS=Caenorhabditis elegans GN=nol-5 PE=1 SV=1 - [O45012_CAEEL]	16811	86.45	54	436	9070.49	77.62	41	237	23703.9	86.24	60	570	1.21
Q27497	gsp-1	Serine/threonine-protein phosphatase PP1-alpha OS=Caenorhabditis elegans GN=gsp-1 PE=3 SV=2 - [GLC7A_CAEEL]	119.99	11.85	4	5	236.535	16.72	5	8	442.305	19.76	7	12	1.21
O17612	ech-1.1	Enoyl-CoA Hydratase OS=Caenorhabditis elegans GN=ech-1.1 PE=1 SV=1 - [O17612_CAEEL]	213.02	11.66	7	10	85.32	5.17	3	3	238.341	8.21	5	11	1.21
O01806	C44E4.4	Uncharacterized protein OS=Caenorhabditis elegans GN=C44E4.4 PE=1 SV=1 - [O01806_CAEEL]	435.15	26.26	8	10	91.65	7.58	2	2	385.94	36.36	9	10	1.21
G5EDU3	pld-1	PhosphoLipase D OS=Caenorhabditis elegans GN=pld-1 PE=1 SV=1 - [G5EDU3_CAEEL]	32.2	0.49	1	1	65.56	1.47	2	2	111.55	1.47	2	3	1.2
H2L035	pmp-5	Peroxisomal Membrane Protein related OS=Caenorhabditis elegans GN=pmp-5 PE=1 SV=1 - [H2L035_CAEEL]	53.91	2.12	1	1	39.75	3.89	2	2	47.8073	4.25	2	3	1.2
G5EF87	swsn-1	SWI/SNF nucleosome remodeling complex component OS=Caenorhabditis elegans GN=swsn-1 PE=1 SV=1 - [G5EF87_CAEEL]	56.66	1.65	1	1	83.26	2.79	2	2	63.0867	2.92	3	3	1.2
Q9TXR7	CELE_F56B3.11	Uncharacterized protein OS=Caenorhabditis elegans GN=CELE_F56B3.11 PE=1 SV=1 - [Q9TXR7_CAEEL]	23.41	5.16	1	1	31.32	9.39	2	2	99.4433	9.39	2	3	1.2
Q9UAY9	rpac-40	RNA Polymerase I/III (A/C) shared subunit OS=Caenorhabditis elegans GN=rpac-40 PE=1 SV=2 - [Q9UAY9_CAEEL]	42.41	3.28	1	1	61.5044	5.19	2	2	95.701	5.46	2	3	1.2
C6KRI7	grsp-2	Glycine Rich Secreted Protein OS=Caenorhabditis elegans GN=grsp-2 PE=1 SV=1 - [C6KRI7_CAEEL]	25.87	4.78	1	1	52.29	9.9	2	2	93.9233	9.9	2	3	1.2
Q94207	sup-36	SUPpressor OS=Caenorhabditis elegans GN=sup-36 PE=1 SV=1 - [Q94207_CAEEL]	36.48	7.1	1	1	31.91	12.43	2	2	120.07	26.63	3	3	1.2
Q9UA63	mrpl-30	Mitochondrial Ribosomal Protein, Large OS=Caenorhabditis elegans GN=mrpl-30 PE=1 SV=1 - [Q9UA63_CAEEL]	42.49	5.58	1	1	51.98	12.18	2	2	71.74	17.77	2	3	1.2
A5Z2W3	CELE_R13H4.2	Uncharacterized protein OS=Caenorhabditis elegans GN=CELE_R13H4.2 PE=1 SV=1 - [A5Z2W3_CAEEL]	283.873	30.67	6	9	200.974	20.44	4	7	420.659	43.11	8	14	1.2
Q9U1W1	tfg-1	TFG related OS=Caenorhabditis elegans GN=tfg-1 PE=1 SV=1 - [Q9U1W1_CAEEL]	216.11	10.7	3	5	153.82	8.44	2	4	386.028	14.81	4	8	1.2
P34342	ran-2	Ran GTPase-activating protein 2 OS=Caenorhabditis elegans GN=ran-2 PE=4 SV=3 - [RGP2_CAEEL]	32.93	1.04	1	1	33.11	1.04	1	1	70.59	2.71	2	2	1.19
Q17335	H24K24.3	Alcohol dehydrogenase class-3 OS=Caenorhabditis elegans GN=H24K24.3 PE=2 SV=1 - [ADHX_CAEEL]	33.95	2.6	1	1	38.53	2.6	1	1	65.8	2.86	2	2	1.19
Q11193	sor-3	Sop-2-related protein 3 OS=Caenorhabditis elegans GN=sor-3 PE=2 SV=3 - [SOR3_CAEEL]	29.87	1.88	1	1	34.97	1.88	1	1	54.2	4.52	2	2	1.19
G5EE56	src-1	Tyrosine protein-kinase src-1 OS=Caenorhabditis elegans GN=src-1 PE=1 SV=1 - [SRC1_CAEEL]	51.24	1.5	1	1	35.59	1.5	1	1	26.88	3.56	2	2	1.19
Q27535	ZC434.8	Probable arginine kinase ZC434.8 OS=Caenorhabditis elegans GN=ZC434.8 PE=3 SV=1 - [KARG2_CAEEL]	64.74	2.78	1	1	64.22	2.78	1	1	88.23	7.22	2	2	1.19
P49404	mrps-18C	Putative 39S ribosomal protein L3, mitochondrial OS=Caenorhabditis elegans GN=mrps-18C PE=3 SV=3 - [RM03_CAEEL]	20.34	2.98	1	1	23.67	2.98	1	1	75.68	5.21	2	2	1.19
P50464	unc-97	LIM domain-containing protein unc-97 OS=Caenorhabditis elegans GN=unc-97 PE=1 SV=1 - [UNC97_CAEEL]	44.16	2.59	1	1	45.64	2.59	1	1	43.1993	4.89	2	2	1.19
N1NVB5	kcc-1	K+/Cl-Cotransporter OS=Caenorhabditis elegans GN=kcc-1 PE=1 SV=1 - [N1NVB5_CAEEL]	32.94	0.97	1	1	30.19	1.26	1	1	42.79	0.97	1	2	1.19
Q17475	B0334.3	Uncharacterized protein OS=Caenorhabditis elegans GN=B0334.3 PE=1 SV=2 - [Q17475_CAEEL]	42.16	1.95	1	1	21.06	1.95	1	1	92.33	3.91	2	2	1.19
Q17948	pptr-2	Protein Phosphatase 2A (Two A) Regulatory subunit OS=Caenorhabditis elegans GN=pptr-2 PE=1 SV=1 - [Q17948_CAEEL]	51.82	1.62	1	1	51.01	1.62	1	1	42.6104	4.31	2	2	1.19
O45781	drr-2	Dietary Restriction Response (WT but not eat-2 lifespan increased) OS=Caenorhabditis elegans GN=drr-2 PE=1 SV=1 - [O45781_CAEEL]	56.65	4.83	1	1	70.1	4.83	1	1	101.13	14.49	2	2	1.19
E3W735	pix-1	PIX (PAK (P21-activated kinase) Interacting eXchange factor) homolog OS=Caenorhabditis elegans GN=pix-1 PE=1 SV=1 - [E3W735_CAEEL]	40.27	2.22	1	1	26.4	2.89	1	1	65.37	5.11	2	2	1.19
Q9BL43	CELE_Y71H2AM.13	Uncharacterized protein OS=Caenorhabditis elegans GN=CELE_Y71H2AM.13 PE=1 SV=1 - [Q9BL43_CAEEL]	36.45	2.18	1	1	34.89	2.18	1	1	29.52	4.91	2	2	1.19
O17626	C31C9.2	Uncharacterized protein OS=Caenorhabditis elegans GN=C31C9.2 PE=1 SV=1 - [O17626_CAEEL]	25.83	2.8	1	1	67.35	4.35	1	1	34.34	10.25	2	2	1.19
G5EFK5	ufd-3	Ubiquitin Fusion Degradation (Yeast UFD homolog) OS=Caenorhabditis elegans GN=ufd-3 PE=1 SV=1 - [G5EFK5_CAEEL]	76.66	1.75	1	1	96.44	1.75	1	1	110	3.73	2	2	1.19
Q5TYL8	C16A3.10	Uncharacterized protein OS=Caenorhabditis elegans GN=C16A3.10 PE=1 SV=1 - [Q5TYL8_CAEEL]	49.53	7.08	1	1	24.58	3.98	1	1	81.75	10.18	2	2	1.19
Q95XY4	nol-6	NucleOLar protein OS=Caenorhabditis elegans GN=nol-6 PE=1 SV=3 - [Q95XY4_CAEEL]	45.11	1.13	1	1	33.79	1.13	1	1	39.86	1.61	2	2	1.19
Q7JPE2	cpna-1	CoPiNe domain protein, Atypical OS=Caenorhabditis elegans GN=cpna-1 PE=1 SV=1 - [Q7JPE2_CAEEL]	36.74	0.92	1	1	23.81	0.92	1	1	71.79	2.2	2	2	1.19
Q20877	CELE_F56D3.1	Uncharacterized protein OS=Caenorhabditis elegans GN=CELE_F56D3.1 PE=1 SV=2 - [Q20877_CAEEL]	49.51	2.27	1	1	38.1	2.27	1	1	58.88	2.27	1	2	1.19
Q95PW8	CELE_ZK546.2	Uncharacterized protein OS=Caenorhabditis elegans GN=CELE_ZK546.2 PE=1 SV=2 - [Q95PW8_CAEEL]	41.96	4.98	1	1	39.7	4.98	1	1	56.01	9.2	2	2	1.19
B3WFW9	C41G7.9	Uncharacterized protein OS=Caenorhabditis elegans GN=C41G7.9 PE=1 SV=1 - [B3WFW9_CAEEL]	24.23	5.26	1	1	35.76	7.02	1	1	82.4	12.28	2	2	1.19
Q3Y3Z9	C01B10.11	Uncharacterized protein OS=Caenorhabditis elegans GN=C01B10.11 PE=1 SV=3 - [Q3Y3Z9_CAEEL]	35.96	3.95	1	1	27.24	3.95	1	1	60.39	7.57	2	2	1.19
B3GWB1	npp-23	Nuclear Pore complex Protein OS=Caenorhabditis elegans GN=npp-23 PE=1 SV=1 - [B3GWB1_CAEEL]	56.51	4.66	1	1	36.51	4.3	1	1	78.49	10.75	2	2	1.19
A5Z2U5	C27A7.5	Uncharacterized protein OS=Caenorhabditis elegans GN=C27A7.5 PE=1 SV=1 - [A5Z2U5_CAEEL]	68.81	1.7	1	1	73.26	1.7	1	1	49.3888	2.94	2	2	1.19
Q18316	rars-2	Arginyl(R) Amino-acyl tRNA Synthetase OS=Caenorhabditis elegans GN=rars-2 PE=1 SV=2 - [Q18316_CAEEL]	43.91	2.34	1	1	28.17	2.34	1	1	48.96	3.91	2	2	1.19
Q09217	B0495.8	Uncharacterized protein B0495.8 OS=Caenorhabditis elegans GN=B0495.8 PE=3 SV=1 - [YP68_CAEEL]	39.22	3.83	1	1	33.56	3.83	1	1	47.27	6.39	2	2	1.19
Q9XWV5	mrps-10	Probable 28S ribosomal protein S10, mitochondrial OS=Caenorhabditis elegans GN=mrps-10 PE=3 SV=1 - [RT10_CAEEL]	27.36	5.13	1	1	25.21	5.13	1	1	31.22	15.38	2	2	1.19
Q7Z2A5	mop-25.1	MO25 (MOuse embryo scaffolding Protein) homolog OS=Caenorhabditis elegans GN=mop-25.1 PE=1 SV=1 - [Q7Z2A5_CAEEL]	33.95	2.39	1	1	42.54	2.39	1	1	54.6249	5.31	2	2	1.19
Q9TYW7	grd-3	GRounDhog (Hedgehog-like family) OS=Caenorhabditis elegans GN=grd-3 PE=1 SV=2 - [Q9TYW7_CAEEL]	40.49	5.52	1	1	35.04	5.52	1	1	130.64	14.36	2	2	1.19
Q18975	col-114	COLlagen OS=Caenorhabditis elegans GN=col-114 PE=1 SV=2 - [Q18975_CAEEL]	54.21	4.05	1	1	29.19	4.05	1	1	92.58	8.72	2	2	1.19
Q94123	Ceasp1	Aspartic protease OS=Caenorhabditis elegans GN=Ceasp1 PE=2 SV=1 - [Q94123_CAEEL]	94.79	4.12	1	1	100.51	4.12	1	1	174.99	8.25	2	2	1.19
O76512	smg-2	Regulator of nonsense transcripts 1 OS=Caenorhabditis elegans GN=smg-2 PE=1 SV=1 - [RENT1_CAEEL]	107.978	2.99	4	5	59.1909	2.25	3	3	172.93	7.11	7	7	1.19
O01757	nath-10	RNA cytidine acetyltransferase OS=Caenorhabditis elegans GN=nath-10 PE=3 SV=1 - [NAT10_CAEEL]	50.8557	4.12	5	5	34.5481	2.78	3	3	127.032	7.86	7	7	1.19
O76566	unc-96	Uncharacterized protein OS=Caenorhabditis elegans GN=unc-96 PE=1 SV=2 - [O76566_CAEEL]	167.65	20.83	5	5	87.7733	9.07	3	3	132.74	13.48	4	7	1.19
G5EDP2	daf-22	Non-specific lipid-transfer protein-like 2 OS=Caenorhabditis elegans GN=daf-22 PE=1 SV=1 - [NLTP2_CAEEL]	174.766	12.86	4	5	110.561	7.77	2	2	208.113	22.33	6	6	1.19
P91917	ola-1	Obg-like ATPase 1 OS=Caenorhabditis elegans GN=ola-1 PE=3 SV=1 - [OLA1_CAEEL]	678.451	42.28	15	24	596.656	41.01	13	19	972.43	57.72	20	37	1.19
Q23050	clik-1	CaLponIn-liKe proteins OS=Caenorhabditis elegans GN=clik-1 PE=1 SV=1 - [Q23050_CAEEL]	609.16	49.01	13	25	202.977	17.73	5	6	694.04	56.65	18	25	1.19
P34601	ZK1098.2	Uncharacterized protein ZK1098.2 OS=Caenorhabditis elegans GN=ZK1098.2 PE=4 SV=3 - [YO62_CAEEL]	305.641	11.54	7	13	93.47	3.54	2	3	284.641	12.31	8	13	1.19
Q21824	prdx-3	Probable peroxiredoxin prdx-3 OS=Caenorhabditis elegans GN=prdx-3 PE=3 SV=1 - [TDX1_CAEEL]	146.895	12.83	2	4	218.231	28.76	6	9	353.925	28.32	7	12	1.19
Q21926	irs-1	Isoleucine--tRNA ligase, cytoplasmic OS=Caenorhabditis elegans GN=irs-1 PE=3 SV=1 - [SYIC_CAEEL]	163.72	6.84	8	9	80.9132	3.07	4	4	241.458	8.06	9	11	1.19
A4LBC3	met-1	Histone-lysine N-methyltransferase OS=Caenorhabditis elegans GN=met-1 PE=1 SV=1 - [A4LBC3_CAEEL]	61.033	2.2	4	5	35.27	0.44	1	1	72.5473	2.08	4	5	1.18
Q21832	rnp-4	RNA-binding protein 8A OS=Caenorhabditis elegans GN=rnp-4 PE=1 SV=1 - [Q21832_CAEEL]	290.44	36.62	4	5	117.86	13.38	1	1	326.79	42.96	4	5	1.18
Q966L9	glh-2	ATP-dependent RNA helicase glh-2 OS=Caenorhabditis elegans GN=glh-2 PE=1 SV=1 - [GLH2_CAEEL]	87.54	4.11	3	4	115.393	6.98	6	7	267.59	10.99	7	10	1.18
Q8MXR2	hrpf-2	HnRNP F homolog OS=Caenorhabditis elegans GN=hrpf-2 PE=1 SV=1 - [Q8MXR2_CAEEL]	98.63	4.43	2	4	130.52	12.46	5	7	252.16	18.2	7	10	1.18
Q9XVT0	rrbs-1	Ribosome biogenesis regulatory protein homolog OS=Caenorhabditis elegans GN=rrbs-1 PE=3 SV=1 - [RRS1_CAEEL]	152.617	6.91	3	4	139.268	20.42	4	6	198.557	16.22	3	9	1.18
P47207	cct-2	T-complex protein 1 subunit beta OS=Caenorhabditis elegans GN=cct-2 PE=1 SV=2 - [TCPB_CAEEL]	292.902	22.87	10	16	131.031	12.85	7	7	481.7	29.49	15	19	1.18
G5EDY8	drp-1	Dynamin-Related Protein OS=Caenorhabditis elegans GN=drp-1 PE=1 SV=1 - [G5EDY8_CAEEL]	251.468	14.04	9	12	138.403	6.95	5	6	297.22	18.44	11	15	1.18
Q9XWI1	CELE_Y54E2A.4	Uncharacterized protein OS=Caenorhabditis elegans GN=CELE_Y54E2A.4 PE=1 SV=2 - [Q9XWI1_CAEEL]	133.08	2.58	5	5					64.67	1.74	4	4	1.17
O01802	rpl-7	60S ribosomal protein L7 OS=Caenorhabditis elegans GN=rpl-7 PE=3 SV=1 - [RL7_CAEEL]	1807.02	71.72	26	64	1177.75	69.26	25	46	2318.19	77.46	27	92	1.17
Q93572	rpa-0	60S acidic ribosomal protein P0 OS=Caenorhabditis elegans GN=rpa-0 PE=1 SV=3 - [RLA0_CAEEL]	1801.26	60.9	18	50	1195.74	43.27	12	31	2636.42	57.05	18	67	1.17
P47208	cct-4	T-complex protein 1 subunit delta OS=Caenorhabditis elegans GN=cct-4 PE=2 SV=1 - [TCPD_CAEEL]	473.914	20.93	9	19	249.153	10.74	5	10	770.365	33.52	14	24	1.17
Q9N5A0	spe-5	Uncharacterized protein OS=Caenorhabditis elegans GN=spe-5 PE=1 SV=1 - [Q9N5A0_CAEEL]	361.866	13.77	4	11	338.905	10.98	3	8	568.947	13.97	4	16	1.17
Q18090	C18E9.6	Mitochondrial import receptor subunit TOM40 homolog OS=Caenorhabditis elegans GN=C18E9.6 PE=3 SV=1 - [TOM40_CAEEL]	56.31	4.98	1	1					50.34	4.98	1	1	1.17
P91309	F46F11.1	Inositol hexakisphosphate and diphosphoinositol-pentakisphosphate kinase OS=Caenorhabditis elegans GN=F46F11.1 PE=3 SV=3 - [VIP1_CAEEL]	47.18	0.76	1	1		0			40.35	0.76	1	1	1.17
P34268	fli-1	Protein flightless-1 homolog OS=Caenorhabditis elegans GN=fli-1 PE=2 SV=2 - [FLII_CAEEL]	24.1	0.8	1	1					32.5	0.8	1	1	1.17
Q95Q95	let-363	Target of rapamycin homolog OS=Caenorhabditis elegans GN=let-363 PE=2 SV=3 - [TOR_CAEEL]	0	0.22	1	1		0			24.1	0.26	1	1	1.17
Q17413	B0001.4	Probable uridine-cytidine kinase OS=Caenorhabditis elegans GN=B0001.4 PE=3 SV=2 - [UCK_CAEEL]	45.06	6.85	1	1					39.61	5.24	1	1	1.17
Q21795	kmo-1	Kynurenine 3-monooxygenase OS=Caenorhabditis elegans GN=kmo-1 PE=3 SV=1 - [KMO_CAEEL]	29.13	1.95	1	1					21.68	1.95	1	1	1.17
Q19317	sel-2	Putative neurobeachin homolog OS=Caenorhabditis elegans GN=sel-2 PE=2 SV=3 - [NBEA_CAEEL]	57.15	0.44	1	1		0			42.66	0.36	1	1	1.17
Q21454	mrpl-35	Probable 39S ribosomal protein L35, mitochondrial OS=Caenorhabditis elegans GN=mrpl-35 PE=3 SV=2 - [RM35_CAEEL]	32.11	6.33	1	1					74.23	6.33	1	1	1.17
O45962	rle-1	Regulation of longevity by E3 ubiquitin-protein ligase OS=Caenorhabditis elegans GN=rle-1 PE=1 SV=4 - [RLE1_CAEEL]	55.81	1.16	1	1					44.02	1.26	1	1	1.17
Q09522	E02H1.1	Probable dimethyladenosine transferase OS=Caenorhabditis elegans GN=E02H1.1 PE=3 SV=2 - [DIM1_CAEEL]	71.74	4.87	1	1					33.25	4.55	1	1	1.17
P41843	T20B12.3	Uncharacterized protein T20B12.3 OS=Caenorhabditis elegans GN=T20B12.3 PE=3 SV=1 - [YO93_CAEEL]	32.35	2.38	1	1					40.06	2.38	1	1	1.17
P53016	rfc-4	Replication factor C subunit 4 OS=Caenorhabditis elegans GN=rfc-4 PE=1 SV=1 - [RFC4_CAEEL]	30.26	4.79	1	1					50.09	4.49	1	1	1.17
Q9XW79	pph-4.1	Serine/threonine-protein phosphatase 4 catalytic subunit 1 OS=Caenorhabditis elegans GN=pph-4.1 PE=1 SV=1 - [PP4C1_CAEEL]	26.88	3.6	1	1					36.54	3.6	1	1	1.17
O76365	tut-1	Cytoplasmic tRNA 2-thiolation protein 1 OS=Caenorhabditis elegans GN=tut-1 PE=1 SV=1 - [CTU1_CAEEL]	27.54	4.02	1	1		0			0	1.88	1	1	1.17
P41879	F37A4.1	Uncharacterized protein F37A4.1 OS=Caenorhabditis elegans GN=F37A4.1 PE=4 SV=1 - [YPT1_CAEEL]	0	1.24	1	1					23.74	2.49	1	1	1.17
Q22647	scpl-4	Mitochondrial import inner membrane translocase subunit TIM50 OS=Caenorhabditis elegans GN=scpl-4 PE=3 SV=1 - [TIM50_CAEEL]	40.42	3.54	1	1					37.14	3.54	1	1	1.17
Q95PZ2	Y67H2A.4	Calcium uptake protein 1 homolog, mitochondrial OS=Caenorhabditis elegans GN=Y67H2A.4 PE=3 SV=2 - [MICU1_CAEEL]	67.21	2.62	1	1		0			0	1.31	1	1	1.17
P22980	hlh-1	Myoblast determination protein 1 homolog OS=Caenorhabditis elegans GN=hlh-1 PE=2 SV=2 - [MYOD1_CAEEL]	55.72	4.01	1	1					49.24	4.01	1	1	1.17
P45965	T09A5.5	Uncharacterized protein T09A5.5 OS=Caenorhabditis elegans GN=T09A5.5 PE=4 SV=1 - [YNZ5_CAEEL]	36.58	9.82	1	1					29.38	9.82	1	1	1.17
D0VWM8	tdp-1	Tar DNA-binding protein homolog 1 OS=Caenorhabditis elegans GN=tdp-1 PE=1 SV=1 - [TADBP_CAEEL]	65.08	3.62	1	1					87.85	3.62	1	1	1.17
S5ZDJ9	ntl-1	NTL-1b OS=Caenorhabditis elegans GN=ntl-1 PE=2 SV=1 - [S5ZDJ9_CAEEL]	24.61	0.8	1	1					0	0.53	1	1	1.17
G5ED75	klp-7	Kinesin-like protein OS=Caenorhabditis elegans GN=klp-7 PE=1 SV=1 - [G5ED75_CAEEL]	28.22	1.6	1	1					38.15	1.6	1	1	1.17
Q965Q1	CELE_Y22D7AL.10	Uncharacterized protein OS=Caenorhabditis elegans GN=CELE_Y22D7AL.10 PE=1 SV=1 - [Q965Q1_CAEEL]	24.15	11.11	1	1					44.23	12.96	1	1	1.17
Q22667	jph-1	JunctoPHilin OS=Caenorhabditis elegans GN=jph-1 PE=1 SV=2 - [Q22667_CAEEL]	35.85	2.28	1	1					30.74	1.34	1	1	1.17
Q23597	CELE_ZK809.3	Uncharacterized protein OS=Caenorhabditis elegans GN=CELE_ZK809.3 PE=1 SV=1 - [Q23597_CAEEL]	43.16	6.19	1	1					29.54	6.19	1	1	1.17
Q95XS1	trap-3	TRanslocon-Associated Protein OS=Caenorhabditis elegans GN=trap-3 PE=1 SV=1 - [Q95XS1_CAEEL]	48.64	6.18	1	1					29.79	6.18	1	1	1.17
Q9XTB5	lem-2	LEM protein 2 OS=Caenorhabditis elegans GN=lem-2 PE=1 SV=1 - [LEM2_CAEEL]	25.5	3.2	1	1					24.34	3.2	1	1	1.17
Q86ND1	let-526	Uncharacterized protein OS=Caenorhabditis elegans GN=let-526 PE=1 SV=1 - [Q86ND1_CAEEL]	29.44	1.36	1	1					36.21	1.36	1	1	1.17
Q22028	dnj-16	DNaJ domain (Prokaryotic heat shock protein) OS=Caenorhabditis elegans GN=dnj-16 PE=1 SV=1 - [Q22028_CAEEL]	37.87	2.12	1	1					34.99	2.12	1	1	1.17
Q19300	farl-11	FAR (Factor ARrest) Like OS=Caenorhabditis elegans GN=farl-11 PE=1 SV=2 - [Q19300_CAEEL]	38.23	0.72	1	1					21.9	1.33	1	1	1.17
Q21096	CELE_K01D12.6	Uncharacterized protein OS=Caenorhabditis elegans GN=CELE_K01D12.6 PE=1 SV=3 - [Q21096_CAEEL]	21.28	1.6	1	1					21.34	1.6	1	1	1.17
N1NTK1	CELE_Y24F12A.1	Uncharacterized protein OS=Caenorhabditis elegans GN=CELE_Y24F12A.1 PE=1 SV=1 - [N1NTK1_CAEEL]	20.59	2.07	1	1					64.09	2.99	1	1	1.17
H2L0D1	CELE_H28G03.1	Uncharacterized protein OS=Caenorhabditis elegans GN=CELE_H28G03.1 PE=1 SV=1 - [H2L0D1_CAEEL]	30.01	4.76	1	1					42.56	3.81	1	1	1.17
P91125	C32E8.5	Uncharacterized protein OS=Caenorhabditis elegans GN=C32E8.5 PE=1 SV=1 - [P91125_CAEEL]	113.37	5.69	1	1					102.12	5.69	1	1	1.17
Q22047	trcs-2	TRansport of membrane to Cell Surface OS=Caenorhabditis elegans GN=trcs-2 PE=1 SV=3 - [Q22047_CAEEL]	20.81	1.03	1	1					24.95	1.03	1	1	1.17
Q21962	CELE_R12C12.1	Uncharacterized protein OS=Caenorhabditis elegans GN=CELE_R12C12.1 PE=1 SV=1 - [Q21962_CAEEL]	25.51	1.02	1	1					31.76	1.53	1	1	1.17
Q22095	CELE_T02C5.1	Uncharacterized protein OS=Caenorhabditis elegans GN=CELE_T02C5.1 PE=1 SV=2 - [Q22095_CAEEL]	39.75	5.33	1	1					40.5	5.33	1	1	1.17
Q22562	CELE_T19B10.2	Uncharacterized protein OS=Caenorhabditis elegans GN=CELE_T19B10.2 PE=1 SV=2 - [Q22562_CAEEL]	68.72	4.35	1	1					77.11	4.35	1	1	1.17
Q18280	C28C12.4	Uncharacterized protein OS=Caenorhabditis elegans GN=C28C12.4 PE=1 SV=1 - [Q18280_CAEEL]	21.57	2.98	1	1					27.96	2.98	1	1	1.17
Q9N3L4	CELE_Y50D7A.3	Uncharacterized protein OS=Caenorhabditis elegans GN=CELE_Y50D7A.3 PE=1 SV=3 - [Q9N3L4_CAEEL]	24.19	2.89	1	1					52.51	2.89	1	1	1.17
O62024	clec-222	C-type LECtin OS=Caenorhabditis elegans GN=clec-222 PE=1 SV=2 - [O62024_CAEEL]	44.96	4.37	1	1					41.87	4.37	1	1	1.17
Q9XVU3	atgp-1	Amino acid Transporter GlycoProtein subunit OS=Caenorhabditis elegans GN=atgp-1 PE=1 SV=2 - [Q9XVU3_CAEEL]	25.54	1.63	1	1					30.74	2.77	1	1	1.17
A4UVJ6	C39D10.3	Uncharacterized protein OS=Caenorhabditis elegans GN=C39D10.3 PE=1 SV=1 - [A4UVJ6_CAEEL]	31.02	2.82	1	1					20.93	10.8	1	1	1.17
H2L0C0	emc-1	EMC Endoplasmic Membrane protein Complex (Yeast EMC) homolog OS=Caenorhabditis elegans GN=emc-1 PE=1 SV=1 - [H2L0C0_CAEEL]	30.2	1.06	1	1					21.57	1.69	1	1	1.17
Q58AA9	rsf-1	RASSF (Ras-association domain family) homolog OS=Caenorhabditis elegans GN=rsf-1 PE=1 SV=1 - [Q58AA9_CAEEL]	21.82	1.62	1	1					36.15	1.62	1	1	1.17
Q9U2V9	map-2	Methionine aminopeptidase 2 OS=Caenorhabditis elegans GN=map-2 PE=1 SV=1 - [Q9U2V9_CAEEL]	21.79	2.03	1	1					24.96	2.7	1	1	1.17
P34500	ttr-2	Transthyretin-like protein 2 OS=Caenorhabditis elegans GN=ttr-2 PE=1 SV=1 - [TTR2_CAEEL]	24.55	9.46	1	1					67.5	9.46	1	1	1.17
H2L0B1	dpf-7	Dipeptidyl Peptidase Four (IV) family OS=Caenorhabditis elegans GN=dpf-7 PE=1 SV=1 - [H2L0B1_CAEEL]	65.95	2.18	1	1					96.73	2.18	1	1	1.17
Q10941	ugt-46	Putative UDP-glucuronosyltransferase ugt-46 OS=Caenorhabditis elegans GN=ugt-46 PE=1 SV=1 - [UGT46_CAEEL]	30.14	1.88	1	1					34.96	2.26	1	1	1.17
Q9GRZ1	ebp-1	Microtubule End Binding Protein OS=Caenorhabditis elegans GN=ebp-1 PE=1 SV=1 - [Q9GRZ1_CAEEL]	25.87	3.16	1	1					33.26	3.16	1	1	1.17
H2L001	hsp-75	Heat Shock Protein OS=Caenorhabditis elegans GN=hsp-75 PE=1 SV=1 - [H2L001_CAEEL]	33.63	1.88	1	1					41.28	3.55	1	1	1.17
Q21486	prp-3	Yeast PRP (Splicing factor) related OS=Caenorhabditis elegans GN=prp-3 PE=1 SV=1 - [Q21486_CAEEL]	75.16	3.06	1	1					91.55	3.06	1	1	1.17
O61818	mrps-30	Mitochondrial Ribosomal Protein, Small OS=Caenorhabditis elegans GN=mrps-30 PE=1 SV=2 - [O61818_CAEEL]	32.04	2.49	1	1					31.84	2.87	1	1	1.17
Q9TYW1	vha-19	Vacuolar H ATPase OS=Caenorhabditis elegans GN=vha-19 PE=1 SV=1 - [Q9TYW1_CAEEL]	95.3	3.33	1	1					78.91	3.33	1	1	1.17
G5EGK0	madd-3	Uncharacterized protein OS=Caenorhabditis elegans GN=madd-3 PE=1 SV=1 - [G5EGK0_CAEEL]	35.58	1.96	1	1					52.59	3.42	1	1	1.17
Q95XD0	exos-2	EXOSome (Multiexonuclease complex) component OS=Caenorhabditis elegans GN=exos-2 PE=1 SV=1 - [Q95XD0_CAEEL]	25.64	2.64	1	1					28.55	2.64	1	1	1.17
Q09519	utx-1	UTX (Ubiquitously transcribed TPR on X) homolog OS=Caenorhabditis elegans GN=utx-1 PE=1 SV=1 - [Q09519_CAEEL]	45.81	0.94	1	1		0			33.79	0.94	1	1	1.17
U4PBU8	plst-1	PLaSTin (Actin bundling protein) homolog OS=Caenorhabditis elegans GN=plst-1 PE=1 SV=1 - [U4PBU8_CAEEL]	25.25	2.45	1	1					22.53	3.81	1	1	1.17
O02236	tbc-14	TBC (Tre-2/Bub2/Cdc16) domain family OS=Caenorhabditis elegans GN=tbc-14 PE=1 SV=2 - [O02236_CAEEL]	27.95	2.54	1	1					28.29	2.54	1	1	1.17
O44151	C49A9.5	Uncharacterized protein OS=Caenorhabditis elegans GN=C49A9.5 PE=1 SV=1 - [O44151_CAEEL]	27.93	1.61	1	1					25.33	4.84	1	1	1.17
Q19058	maoc-1	MAO-C-like dehydratase domain OS=Caenorhabditis elegans GN=maoc-1 PE=1 SV=1 - [Q19058_CAEEL]	29.37	6.38	1	1					21.02	5.37	1	1	1.17
Q9NA69	CELE_Y57A10A.13	Uncharacterized protein OS=Caenorhabditis elegans GN=CELE_Y57A10A.13 PE=1 SV=1 - [Q9NA69_CAEEL]	32.44	1.13	1	1					32.68	1.13	1	1	1.17
E5QCI8	nhr-49	Nuclear Hormone Receptor family OS=Caenorhabditis elegans GN=nhr-49 PE=1 SV=1 - [E5QCI8_CAEEL]	30.87	3.39	1	1					34.39	3.39	1	1	1.17
Q86NE0	asp-2	ASpartyl Protease OS=Caenorhabditis elegans GN=asp-2 PE=1 SV=1 - [Q86NE0_CAEEL]	60.95	3.96	1	1					28.41	3.03	1	1	1.17
O61843	unc-57	Uncharacterized protein OS=Caenorhabditis elegans GN=unc-57 PE=1 SV=3 - [O61843_CAEEL]	45.51	3.45	1	1					36.2	3.45	1	1	1.17
Q9U287	CELE_Y48C3A.20	Uncharacterized protein OS=Caenorhabditis elegans GN=CELE_Y48C3A.20 PE=1 SV=1 - [Q9U287_CAEEL]	28.23	2.05	1	1					34.02	2.05	1	1	1.17
O16515	CELE_T05H4.10	Uncharacterized protein OS=Caenorhabditis elegans GN=CELE_T05H4.10 PE=1 SV=2 - [O16515_CAEEL]	34.9	2.73	1	1		0			45.84	2.73	1	1	1.17
G5EER4	ger-1	GDP-4-keto-6-deoxy-D-mannose-3,5-epimerase-4-reductase OS=Caenorhabditis elegans GN=ger-1 PE=1 SV=1 - [G5EER4_CAEEL]	25.28	5.08	1	1					22.45	4.76	1	1	1.17
O02628	cyp-35a2	CYtochrome P450 family OS=Caenorhabditis elegans GN=cyp-35a2 PE=1 SV=2 - [O02628_CAEEL]	27.19	1.42	1	1					23.53	3.64	1	1	1.17
Q18224	ntl-9	NOT-Like (Yeast CCR4/NOT complex component) OS=Caenorhabditis elegans GN=ntl-9 PE=1 SV=2 - [Q18224_CAEEL]	65.44	4.05	1	1					90.96	4.05	1	1	1.17
Q17569	C01G5.6	Uncharacterized protein OS=Caenorhabditis elegans GN=C01G5.6 PE=1 SV=2 - [Q17569_CAEEL]	35.14	3.6	1	1					26.1	3.6	1	1	1.17
Q688C0	mrps-24	28S ribosomal protein S24, mitochondrial OS=Caenorhabditis elegans GN=mrps-24 PE=3 SV=1 - [RT24_CAEEL]	43.2	10.98	1	1					45.02	10.98	1	1	1.17
P34560	rmd-1	Regulator of microtubule dynamics protein 1 OS=Caenorhabditis elegans GN=rmd-1 PE=1 SV=2 - [RMD1_CAEEL]	52.42	4.87	1	1					58.93	6.64	1	1	1.17
G5EGH7	lon-8	LON-8 OS=Caenorhabditis elegans GN=lon-8 PE=1 SV=1 - [G5EGH7_CAEEL]	61.06	6.79	1	1					45.79	6.79	1	1	1.17
Q94051	cav-1	Caveolin-1 OS=Caenorhabditis elegans GN=cav-1 PE=2 SV=1 - [CAV1_CAEEL]	22.79	3.4	1	1					41.57	3.4	1	1	1.17
Q10130	dhs-5	Uncharacterized oxidoreductase dhs-5 OS=Caenorhabditis elegans GN=dhs-5 PE=3 SV=2 - [DHS5_CAEEL]	32.23	3.44	1	1					52.74	3.44	1	1	1.17
Q10660	dom-3	Decapping nuclease dom-3 OS=Caenorhabditis elegans GN=dom-3 PE=2 SV=1 - [DXO_CAEEL]	51.32	2.54	1	1					22	2.54	1	1	1.17
Q22078	npp-2	Nuclear Pore complex Protein OS=Caenorhabditis elegans GN=npp-2 PE=1 SV=1 - [Q22078_CAEEL]	37.58	1.17	1	1					42.21	2.34	1	1	1.17
Q965S0	rpb-9	DNA-directed RNA polymerase subunit OS=Caenorhabditis elegans GN=rpb-9 PE=1 SV=1 - [Q965S0_CAEEL]	23.01	5.39	1	1					20.55	5.39	1	1	1.17
O45577	cpf-2	Cleavage and Polyadenylation Factor OS=Caenorhabditis elegans GN=cpf-2 PE=1 SV=1 - [O45577_CAEEL]	24.2	5.06	1	1					92.41	5.06	1	1	1.17
Q20736	apm-3	AdaPtin, Mu/medium chain (Clathrin associated complex) OS=Caenorhabditis elegans GN=apm-3 PE=1 SV=2 - [Q20736_CAEEL]	24.34	1.93	1	1					35.73	2.9	1	1	1.17
B1V898	poml-3	PON (Paraoxonase) and MEC-6 Like OS=Caenorhabditis elegans GN=poml-3 PE=1 SV=1 - [B1V898_CAEEL]	34.62	2.47	1	1					0	2.47	1	1	1.17
W6RTL8	CELE_Y40C5A.4	Uncharacterized protein OS=Caenorhabditis elegans GN=CELE_Y40C5A.4 PE=4 SV=1 - [W6RTL8_CAEEL]	38.41	3.41	1	1					36.88	3.41	1	1	1.17
G5EEN7	CELE_Y39A1A.3	Uncharacterized protein OS=Caenorhabditis elegans GN=CELE_Y39A1A.3 PE=1 SV=1 - [G5EEN7_CAEEL]	31.91	4.74	1	1					43.66	4.74	1	1	1.17
G5ED38	col-43	COLlagen OS=Caenorhabditis elegans GN=col-43 PE=2 SV=1 - [G5ED38_CAEEL]	37.18	3.3	1	1					58.59	4.95	1	1	1.17
Q17543	C01B10.3	Uncharacterized protein OS=Caenorhabditis elegans GN=C01B10.3 PE=1 SV=2 - [Q17543_CAEEL]	21.19	2.74	1	1					51.5	2.74	1	1	1.17
Q9XWP1	CELE_Y43F8C.7	Uncharacterized protein OS=Caenorhabditis elegans GN=CELE_Y43F8C.7 PE=1 SV=1 - [Q9XWP1_CAEEL]	30.4	5.51	1	1					39.33	5.51	1	1	1.17
A0A0K3ARL0	ubxn-3	UBX-containing protein in Nematodes OS=Caenorhabditis elegans GN=ubxn-3 PE=1 SV=1 - [A0A0K3ARL0_CAEEL]	46.66	5.13	1	1					46.19	5.13	1	1	1.17
Q9XWN7	CELE_Y43F8C.13	Uncharacterized protein OS=Caenorhabditis elegans GN=CELE_Y43F8C.13 PE=1 SV=1 - [Q9XWN7_CAEEL]	64.01	3.85	1	1					33.04	3.25	1	1	1.17
Q20990	CELE_F58F9.3	Uncharacterized protein OS=Caenorhabditis elegans GN=CELE_F58F9.3 PE=1 SV=2 - [Q20990_CAEEL]	47.98	3.73	1	1					42.3	3.73	1	1	1.17
Q21540	cut-6	CUTiclin OS=Caenorhabditis elegans GN=cut-6 PE=4 SV=2 - [Q21540_CAEEL]	34.9	2.1	1	1					41.85	2.1	1	1	1.17
D7SFN6	C56A3.6	Uncharacterized protein OS=Caenorhabditis elegans GN=C56A3.6 PE=1 SV=1 - [D7SFN6_CAEEL]	56.35	3.27	1	1					26.06	2.76	1	1	1.17
U4PBM6	C09E9.1	Uncharacterized protein OS=Caenorhabditis elegans GN=C09E9.1 PE=4 SV=1 - [U4PBM6_CAEEL]	28.75	20	1	1					26.63	20	1	1	1.17
Q7Z152	col-51	COLlagen OS=Caenorhabditis elegans GN=col-51 PE=4 SV=2 - [Q7Z152_CAEEL]	32.16	6.64	1	1					50.35	6.64	1	1	1.17
Q17880	nuo-1	NADH Ubiquinone Oxidoreductase OS=Caenorhabditis elegans GN=nuo-1 PE=1 SV=1 - [Q17880_CAEEL]					53.49	4.18	2	4	68.4412	8.98	4	4	1.16
P34183	hrs-1	Histidine--tRNA ligase OS=Caenorhabditis elegans GN=hrs-1 PE=2 SV=3 - [SYH_CAEEL]	68.51	5.95	3	4	107.85	6.91	3	3	194.833	10.94	5	6	1.16
S6F568	hum-4	Heavy chain, Unconventional Myosin OS=Caenorhabditis elegans GN=hum-4 PE=1 SV=1 - [S6F568_CAEEL]	81.16	1.69	4	4	48.9872	1.14	3	3	107.27	1.77	5	6	1.16
Q86GC2	adr-1	Adenosine Deaminase acting on RNA OS=Caenorhabditis elegans GN=adr-1 PE=1 SV=1 - [Q86GC2_CAEEL]	192.46	4.26	3	4	124.923	2.46	2	3	233.35	7.95	5	6	1.16
H2L0N9	CELE_Y37E3.17	Uncharacterized protein OS=Caenorhabditis elegans GN=CELE_Y37E3.17 PE=1 SV=1 - [H2L0N9_CAEEL]	84.73	5.66	4	4	45.2667	4.34	3	3	174.82	9.64	6	6	1.16
Q93338	rpb-3	RNA Polymerase II (B) subunit OS=Caenorhabditis elegans GN=rpb-3 PE=1 SV=2 - [Q93338_CAEEL]	93.32	13.12	3	4	87.64	13.12	3	3	137.304	19.86	4	6	1.16
Q9U302	pab-1	Polyadenylate-binding protein OS=Caenorhabditis elegans GN=pab-1 PE=1 SV=1 - [Q9U302_CAEEL]	1525.85	40.71	21	56	761.189	29.1	16	27	2153.19	49.23	25	67	1.16
Q95XY1	vbh-1	Vasa-and Belle-like Helicase OS=Caenorhabditis elegans GN=vbh-1 PE=1 SV=1 - [Q95XY1_CAEEL]	665.682	16.61	11	28	443.565	13.66	8	18	908.842	27.95	17	38	1.16
Q20751	iff-2	Eukaryotic translation initiation factor 5A-2 OS=Caenorhabditis elegans GN=iff-2 PE=2 SV=1 - [IF5A2_CAEEL]	218.31	14.29	2	7	219.755	27.95	4	8	385.458	44.72	5	13	1.16
Q9U332	rpl-31	60S ribosomal protein L31 OS=Caenorhabditis elegans GN=rpl-31 PE=3 SV=1 - [RL31_CAEEL]	131.797	22.95	4	7	151.899	22.95	4	7	174.575	37.7	7	12	1.16
Q21230	K04G2.1	Eukaryotic translation initiation factor 2 subunit 2 OS=Caenorhabditis elegans GN=K04G2.1 PE=3 SV=4 - [IF2B_CAEEL]	158.961	25.6	4	7	130.127	28.4	4	7	360.556	24.4	7	12	1.16
Q20329	CELE_F42C5.9	Uncharacterized protein OS=Caenorhabditis elegans GN=CELE_F42C5.9 PE=1 SV=1 - [Q20329_CAEEL]	58.2	5.07	3	3	147.7	13.41	7	8	189.674	16.12	8	10	1.16
Q8MXR6	sqd-1	Homologous to Drosophila SQD (Squid) protein OS=Caenorhabditis elegans GN=sqd-1 PE=1 SV=1 - [Q8MXR6_CAEEL]	317.09	31.8	5	8	169.153	16.72	3	3	411.195	27.87	6	9	1.16
P34475	tbg-1	Tubulin gamma chain OS=Caenorhabditis elegans GN=tbg-1 PE=2 SV=1 - [TBG_CAEEL]					76.71	8.56	3	3	90.4833	9.01	2	3	1.15
Q8MXS8	CELE_Y47G6A.22	Uncharacterized protein OS=Caenorhabditis elegans GN=CELE_Y47G6A.22 PE=1 SV=1 - [Q8MXS8_CAEEL]					72.02	15.35	3	3	34.76	8.27	1	3	1.15
Q21504	CELE_M04B2.4	Uncharacterized protein OS=Caenorhabditis elegans GN=CELE_M04B2.4 PE=1 SV=1 - [Q21504_CAEEL]					70.7067	7.02	3	3	68.5067	6.83	3	3	1.15
O01422	csn-2	COP9 signalosome complex subunit 2 OS=Caenorhabditis elegans GN=csn-2 PE=1 SV=2 - [CSN2_CAEEL]	95.73	8.08	4	4	57.879	4.04	2	2	111.2	11.92	5	5	1.15
Q19905	sqv-4	UDP-glucose 6-dehydrogenase OS=Caenorhabditis elegans GN=sqv-4 PE=1 SV=1 - [UGDH_CAEEL]	170.92	9.56	3	4	97.05	4.78	2	2	226.82	14.55	5	5	1.15
Q09313	dct-6	Protein dct-6 OS=Caenorhabditis elegans GN=dct-6 PE=4 SV=2 - [DCT6_CAEEL]	91.51	6.83	4	4	96.56	3.36	2	2	112.13	7.8	5	5	1.15
Q19842	pcca-1	Propionyl-CoA carboxylase alpha chain, mitochondrial OS=Caenorhabditis elegans GN=pcca-1 PE=1 SV=1 - [PCCA_CAEEL]	30.88	6.22	4	4	40.8883	2.9	2	2	160.353	8.98	4	5	1.15
O17732	pyc-1	Pyruvate carboxylase 1 OS=Caenorhabditis elegans GN=pyc-1 PE=1 SV=1 - [PYC1_CAEEL]	1603.62	35.15	35	70	2231.87	41.87	44	89	3882.02	55.57	54	135	1.15
Q23621	gdh-1	Glutamate dehydrogenase OS=Caenorhabditis elegans GN=gdh-1 PE=1 SV=1 - [Q23621_CAEEL]	849.826	37.13	17	35	560.16	39.55	21	29	1460.84	44.4	24	53	1.15
O16368	rpt-2	Probable 26S protease regulatory subunit 4 OS=Caenorhabditis elegans GN=rpt-2 PE=3 SV=1 - [PRS4_CAEEL]	649.552	33.63	13	25	263.93	23.25	8	10	895.536	41.53	16	28	1.15
Q9BKU3	CELE_Y37E3.10	Uncharacterized protein OS=Caenorhabditis elegans GN=CELE_Y37E3.10 PE=1 SV=2 - [Q9BKU3_CAEEL]	592.96	44.15	12	20	246.042	33.33	9	12	870.017	59.94	16	26	1.15
Q20938	rpn-6.1	Probable 26S proteasome regulatory subunit rpn-6.1 OS=Caenorhabditis elegans GN=rpn-6.1 PE=2 SV=2 - [PS11A_CAEEL]	285.78	27.85	8	10	204.055	18.26	5	8	531.416	21.92	7	15	1.15
G5ECY0	dlg-1	Drosophila Discs LarGe homolog OS=Caenorhabditis elegans GN=dlg-1 PE=1 SV=1 - [G5ECY0_CAEEL]	318.17	9.2	8	10	214.415	11.79	8	8	386.613	17.68	13	15	1.15
Q22111	mmaa-1	Methylmalonic aciduria type A homolog, mitochondrial OS=Caenorhabditis elegans GN=mmaa-1 PE=3 SV=2 - [MMAA1_CAEEL]	371.55	21.8	6	10	227.11	16.04	4	6	552.162	18.55	6	13	1.14
M1ZJY1	spk-1	SR Protein Kinase OS=Caenorhabditis elegans GN=spk-1 PE=1 SV=1 - [M1ZJY1_CAEEL]	74.57	5.82	3	4	38.57	1.94	1	1	69.57	5.82	3	4	1.13
Q95YD5	vha-16	Vacuolar H ATPase OS=Caenorhabditis elegans GN=vha-16 PE=1 SV=1 - [Q95YD5_CAEEL]	123.75	10.92	3	4	64.4	5.17	1	1	143.96	13.22	3	4	1.13
P34668	ZK686.2	Putative ATP-dependent RNA helicase ZK686.2 OS=Caenorhabditis elegans GN=ZK686.2 PE=3 SV=2 - [YO12_CAEEL]	95.4433	5.4	3	3	128.45	7.42	4	4	185.97	11.64	6	6	1.13
Q21930	rpl-28	60S ribosomal protein L28 OS=Caenorhabditis elegans GN=rpl-28 PE=1 SV=3 - [RL28_CAEEL]	104.519	23.81	3	3	118.733	29.37	4	4	125.74	42.06	5	6	1.13
Q23624	CELE_ZK829.7	Uncharacterized protein OS=Caenorhabditis elegans GN=CELE_ZK829.7 PE=1 SV=2 - [Q23624_CAEEL]	333.924	15.86	5	9	343.145	15.86	5	9	456.658	22.04	6	15	1.13
G5EGK8	let-92	Serine/threonine-protein phosphatase OS=Caenorhabditis elegans GN=let-92 PE=1 SV=1 - [G5EGK8_CAEEL]	325.719	27.99	7	9	258.855	15.41	5	8	415.046	29.25	8	14	1.13
P34498	mog-1	Probable pre-mRNA-splicing factor ATP-dependent RNA helicase mog-1 OS=Caenorhabditis elegans GN=mog-1 PE=1 SV=2 - [MOG1_CAEEL]	176.67	8.22	8	10	130.92	4.51	5	5	208.945	9.11	9	12	1.13
P54412	eef-1G	Probable elongation factor 1-gamma OS=Caenorhabditis elegans GN=eef-1G PE=3 SV=1 - [EF1G_CAEEL]	282.83	27.39	8	10	196.62	13.32	4	5	389.922	24.87	8	12	1.13
Q9TZS5	cct-7	Chaperonin Containing TCP-1 OS=Caenorhabditis elegans GN=cct-7 PE=1 SV=2 - [Q9TZS5_CAEEL]	185.68	14.58	7	10	138.26	8.97	4	5	316.485	26.36	11	12	1.13
Q7YTG7	CELE_D2030.2	Uncharacterized protein OS=Caenorhabditis elegans GN=CELE_D2030.2 PE=1 SV=1 - [Q7YTG7_CAEEL]	119.967	8.72	4	7	72.0667	7.02	3	3	198.05	19.36	8	8	1.13
Q18508	mel-28	Uncharacterized protein OS=Caenorhabditis elegans GN=mel-28 PE=1 SV=2 - [Q18508_CAEEL]		0			34.44	1.4	2	2	99.5795	1.4	2	2	1.12
Q9BHL6	aakg-1	AMP-Activated protein Kinase Gamma subunit OS=Caenorhabditis elegans GN=aakg-1 PE=1 SV=2 - [Q9BHL6_CAEEL]					30.22	3.95	2	2	52.3	3.95	2	2	1.12
B7WN81	ddx-19	DEAD boX helicase homolog OS=Caenorhabditis elegans GN=ddx-19 PE=1 SV=1 - [B7WN81_CAEEL]					65.59	4.02	2	2	59.28	4.43	2	2	1.12
Q9NAN2	par-6	Partitioning defective protein 6 OS=Caenorhabditis elegans GN=par-6 PE=1 SV=2 - [PAR6_CAEEL]					29.94	11.65	2	2	61.9559	5.83	2	2	1.12
I2HA98	pah-1	PhenylAlanine Hydroxylase OS=Caenorhabditis elegans GN=pah-1 PE=1 SV=1 - [I2HA98_CAEEL]					59.91	4.64	2	2	32.88	3.97	2	2	1.12
P18833	col-8	Cuticle collagen 8 OS=Caenorhabditis elegans GN=col-8 PE=3 SV=2 - [COL8_CAEEL]					87.77	6.03	1	2	133.85	6.03	1	2	1.12
P91013	dhs-1	DeHydrogenases, Short chain OS=Caenorhabditis elegans GN=dhs-1 PE=1 SV=1 - [P91013_CAEEL]					29.09	5.26	2	2	47.54	5.88	2	2	1.12
P91194	CELE_D2092.4	Uncharacterized protein OS=Caenorhabditis elegans GN=CELE_D2092.4 PE=1 SV=2 - [P91194_CAEEL]	186.7	22.59	5	6	101.25	9.64	3	5	285.904	25.62	7	9	1.12
Q9TZL8	pfk-1	ATP-dependent 6-phosphofructokinase 1 OS=Caenorhabditis elegans GN=pfk-1 PE=3 SV=2 - [PFKA1_CAEEL]	506.758	22.48	15	20	647.837	23.71	17	26	1077.65	33.05	24	38	1.12
O44480	rpl-20	60S ribosomal protein L18a OS=Caenorhabditis elegans GN=rpl-20 PE=3 SV=2 - [RL18A_CAEEL]	735.96	57.78	15	25	679.668	52.78	13	21	1439.84	60	17	37	1.12
Q27527	enol-1	Enolase OS=Caenorhabditis elegans GN=enol-1 PE=1 SV=3 - [ENO_CAEEL]	354.493	29.72	9	12	259.906	23.04	7	9	728.136	41.47	12	17	1.12
O17953	dld-1	Dihydrolipoyl dehydrogenase, mitochondrial OS=Caenorhabditis elegans GN=dld-1 PE=3 SV=2 - [DLDH_CAEEL]	302.69	17.78	5	8	288.38	25.25	8	10	393.833	25.86	8	15	1.12
G5ED07	pdi-3	Protein disulfide-isomerase OS=Caenorhabditis elegans GN=pdi-3 PE=1 SV=1 - [G5ED07_CAEEL]	124.793	13.73	5	7	48.24	4.51	2	2	168.76	12.91	5	7	1.12
Q23356	mig-15	Serine/threonine-protein kinase mig-15 OS=Caenorhabditis elegans GN=mig-15 PE=2 SV=3 - [MIG15_CAEEL]	39.17	1.82	2	4					76.63	3.74	3	3	1.11
Q95PZ0	csn-6	COP9 signalosome complex subunit 6 OS=Caenorhabditis elegans GN=csn-6 PE=1 SV=1 - [CSN6_CAEEL]	76.45	11.5	4	4					74.6938	7.98	3	3	1.11
O17352	aagr-4	Acid Alpha Glucosidase Relate OS=Caenorhabditis elegans GN=aagr-4 PE=1 SV=3 - [O17352_CAEEL]	128.75	5.43	4	4					75.9567	3.65	3	3	1.11
Q9N4G9	snr-7	Probable small nuclear ribonucleoprotein G OS=Caenorhabditis elegans GN=snr-7 PE=3 SV=1 - [RUXG_CAEEL]	99.3733	53.25	3	4					87.57	36.36	2	3	1.11
H2L0I5	CELE_Y67D8A.2	Uncharacterized protein OS=Caenorhabditis elegans GN=CELE_Y67D8A.2 PE=1 SV=1 - [H2L0I5_CAEEL]	95.29	2.55	3	4					78.6833	2.87	3	3	1.11
G5EEG7	smu-1	SMU-1 OS=Caenorhabditis elegans GN=smu-1 PE=1 SV=1 - [G5EEG7_CAEEL]	98.33	8.24	4	4					81.81	8.43	3	3	1.11
Q93235	nkb-1	Sodium/potassium-transporting ATPase subunit beta-1 OS=Caenorhabditis elegans GN=nkb-1 PE=1 SV=1 - [AT1B1_CAEEL]	100.69	12.5	3	3	119.957	13.13	3	3	82.8989	13.44	5	5	1.11
O18178	pptr-1	Protein Phosphatase 2A (Two A) Regulatory subunit OS=Caenorhabditis elegans GN=pptr-1 PE=1 SV=4 - [O18178_CAEEL]	58.4733	7.56	3	3	69.41	6.27	3	3	116.14	8.86	4	5	1.11
H1UBL0	zoo-1	ZO-1 (Zonula Occludens tight junctional protein) Ortholog OS=Caenorhabditis elegans GN=zoo-1 PE=1 SV=1 - [H1UBL0_CAEEL]	85.4933	3.46	3	3	43.26	2.79	3	3	95.92	5.39	5	5	1.11
O17694	ril-1	RNAi-Induced Longevity OS=Caenorhabditis elegans GN=ril-1 PE=1 SV=1 - [O17694_CAEEL]	151.565	30.94	3	5	191.583	35.97	4	7	255.254	43.17	6	10	1.11
Q20655	ftt-2	14-3-3-like protein 2 OS=Caenorhabditis elegans GN=ftt-2 PE=1 SV=1 - [14332_CAEEL]	201.287	14.92	5	6	134.26	12.5	3	4	291.93	25.81	6	8	1.11
Q95Y15	npp-8	Nuclear Pore complex Protein OS=Caenorhabditis elegans GN=npp-8 PE=1 SV=4 - [Q95Y15_CAEEL]	104.497	3.83	5	6	85.82	3.42	4	4	194.931	7.08	8	8	1.11
Q9U2Z1	sec-23	Yeast SEC homolog OS=Caenorhabditis elegans GN=sec-23 PE=1 SV=2 - [Q9U2Z1_CAEEL]	180.56	6.46	4	6	58.17	8.53	4	4	186.893	11.57	7	8	1.11
Q93619	tag-173	Uncharacterized protein OS=Caenorhabditis elegans GN=tag-173 PE=1 SV=1 - [Q93619_CAEEL]	290.199	18.85	4	7	372.665	40.44	6	11	650.107	40.16	7	15	1.11
G5EDR3	sur-6	Serine/threonine-protein phosphatase 2A 55 kDa regulatory subunit B OS=Caenorhabditis elegans GN=sur-6 PE=1 SV=1 - [G5EDR3_CAEEL]	76.2289	3.84	2	2	128.78	13.13	5	5	128.837	12.53	6	6	1.1
P48150	rps-14	40S ribosomal protein S14 OS=Caenorhabditis elegans GN=rps-14 PE=3 SV=1 - [RS14_CAEEL]	1000.58	51.97	11	28	1104.47	52.63	10	34	1745.25	55.26	15	50	1.1
P11141	hsp-6	Heat shock 70 kDa protein F, mitochondrial OS=Caenorhabditis elegans GN=hsp-6 PE=1 SV=2 - [HSP7F_CAEEL]	535.873	12.94	6	12	863.594	24.05	12	23	885.009	28.46	15	29	1.1
Q18787	rpt-1	26S protease regulatory subunit 7 OS=Caenorhabditis elegans GN=rpt-1 PE=1 SV=1 - [PRS7_CAEEL]	707.251	24.83	9	19	368.238	22.3	8	13	720.635	40.46	17	25	1.1
Q86NC1	CELE_T22F3.3	Alpha-1,4 glucan phosphorylase OS=Caenorhabditis elegans GN=CELE_T22F3.3 PE=1 SV=1 - [Q86NC1_CAEEL]	411.97	19.62	13	17	263.158	10.99	8	10	592.117	20.45	15	21	1.1
P04970	gpd-1	Glyceraldehyde-3-phosphate dehydrogenase 1 OS=Caenorhabditis elegans GN=gpd-1 PE=3 SV=1 - [G3P1_CAEEL]	131.943	17.01	4	6	437.128	24.63	6	13	694.947	17.6	4	16	1.1
P91918	snr-2	Probable small nuclear ribonucleoprotein-associated protein B OS=Caenorhabditis elegans GN=snr-2 PE=3 SV=1 - [RSMB_CAEEL]	123.374	41.88	5	9	65.487	9.38	2	4	188.032	46.25	6	10	1.1
G5EC23	hcf-1	HCF1 related OS=Caenorhabditis elegans GN=hcf-1 PE=1 SV=1 - [G5EC23_CAEEL]	99.22	4.6	3	3	88.27	2.94	2	2	114.61	6.52	4	4	1.09
Q22968	gcst-1	Aminomethyltransferase OS=Caenorhabditis elegans GN=gcst-1 PE=1 SV=1 - [Q22968_CAEEL]	112.023	7.96	3	3	51.95	4.48	2	2	122.23	8.46	3	4	1.09
Q22053	fib-1	rRNA 2'-O-methyltransferase fibrillarin OS=Caenorhabditis elegans GN=fib-1 PE=3 SV=1 - [FBRL_CAEEL]	22877.6	67.61	37	715	31325.2	66.76	41	976	45655.3	67.61	40	1357	1.09
Q1XFY9	rps-24	Ribosomal Protein, Small subunit OS=Caenorhabditis elegans GN=rps-24 PE=1 SV=1 - [Q1XFY9_CAEEL]	606.794	35.88	7	18	517.065	35.88	6	14	819.713	45.8	7	25	1.09
G5ED31	ucr-2.1	Ubiquinol-Cytochrome c oxidoReductase complex OS=Caenorhabditis elegans GN=ucr-2.1 PE=1 SV=1 - [G5ED31_CAEEL]	314.896	17.56	5	7	293.852	32.2	8	9	503.35	26.1	7	13	1.09
Q9N4H7	copa-1	Coatomer subunit alpha OS=Caenorhabditis elegans GN=copa-1 PE=1 SV=2 - [Q9N4H7_CAEEL]	1206.5	25.32	28	49	809.106	23.94	24	34	1757.1	33.85	34	64	1.08
Q9XTZ2	rsp-8	SR Protein (Splicing factor) OS=Caenorhabditis elegans GN=rsp-8 PE=1 SV=1 - [Q9XTZ2_CAEEL]	442.681	43.69	15	23	532.035	37.86	14	24	1094.72	47.9	18	37	1.08
D0IMZ7	fln-1	FiLamiN (Actin binding protein) homolog OS=Caenorhabditis elegans GN=fln-1 PE=1 SV=1 - [D0IMZ7_CAEEL]	330.347	6.17	11	15	494.65	7.62	12	20	736.49	12.48	20	28	1.08
Q21210	CELE_K04C2.2	Uncharacterized protein OS=Caenorhabditis elegans GN=CELE_K04C2.2 PE=1 SV=1 - [Q21210_CAEEL]	393.449	15.15	12	15	77.75	4.65	3	4	348.103	14.55	11	14	1.08
Q18217	ula-1	NEDD8-activating enzyme E1 regulatory subunit OS=Caenorhabditis elegans GN=ula-1 PE=3 SV=2 - [ULA1_CAEEL]		0			23.89	1.85	1	1	33.1	1.85	1	1	1.08
Q8I100	rabx-5	RAB eXchange factor OS=Caenorhabditis elegans GN=rabx-5 PE=1 SV=2 - [Q8I100_CAEEL]		0			23.96	1.35	1	1	26.46	1.35	1	1	1.08
U4PC56	tftc-1	Transcription Factor ThreeC subunit (GTF3C homolog) OS=Caenorhabditis elegans GN=tftc-1 PE=1 SV=1 - [U4PC56_CAEEL]		0			29.05	0.59	1	1	45.92	1.09	1	1	1.08
Q9XZQ7	TLF	TBP-like factor (Fragment) OS=Caenorhabditis elegans GN=TLF PE=2 SV=1 - [Q9XZQ7_CAEEL]		0			62.03	5.29	1	1	30.16	1.98	1	1	1.08
V6CK55	bicd-1	BICaudal D (Drosophila) homolog OS=Caenorhabditis elegans GN=bicd-1 PE=1 SV=1 - [V6CK55_CAEEL]		0			0	1.52	1	1	31.62	1.52	1	1	1.08
B2D6M2	lin-61	Protein lin-61 OS=Caenorhabditis elegans GN=lin-61 PE=1 SV=1 - [LIN61_CAEEL]		0			52.46	2.12	1	1	30.74	1.8	1	1	1.08
Q20184	ech-2	Enoyl-CoA Hydratase OS=Caenorhabditis elegans GN=ech-2 PE=1 SV=2 - [Q20184_CAEEL]		0			58.45	8.13	1	1	42.68	8.13	1	1	1.08
O44128	lip-1	Lateral-signal-Induced Phosphatase OS=Caenorhabditis elegans GN=lip-1 PE=1 SV=2 - [O44128_CAEEL]		0			26.44	2.71	1	1	34.12	2.71	1	1	1.08
Q93459	nubp-1	Cytosolic Fe-S cluster assembly factor NUBP1 homolog OS=Caenorhabditis elegans GN=nubp-1 PE=2 SV=2 - [NUBP1_CAEEL]					41.73	2.56	1	1	27.06	5.75	1	1	1.08
Q7Z071	tnt-2	TropoNin T OS=Caenorhabditis elegans GN=tnt-2 PE=1 SV=1 - [Q7Z071_CAEEL]					34.43	3.4	1	1	41.18	4.01	1	1	1.08
Q21831	snfc-5	SNF chromatin remodeling Complex component OS=Caenorhabditis elegans GN=snfc-5 PE=1 SV=1 - [Q21831_CAEEL]					24.23	5.51	1	1	107.53	4.46	1	1	1.08
Q18969	rab-39	RAB family OS=Caenorhabditis elegans GN=rab-39 PE=1 SV=2 - [Q18969_CAEEL]					26.74	8.3	1	1	33.62	4.8	1	1	1.08
A6PVA1	C44E4.5	Uncharacterized protein OS=Caenorhabditis elegans GN=C44E4.5 PE=1 SV=1 - [A6PVA1_CAEEL]					53.71	2.23	1	1	41.26	2.97	1	1	1.08
O62337	CELE_R06C1.4	Uncharacterized protein OS=Caenorhabditis elegans GN=CELE_R06C1.4 PE=1 SV=1 - [O62337_CAEEL]					66.75	17.86	1	1	67.14	17.86	1	1	1.08
H2KZ18	ampd-1	Adenosine MonoPhosphate Deaminase homolog OS=Caenorhabditis elegans GN=ampd-1 PE=1 SV=1 - [H2KZ18_CAEEL]					39.73	0.89	1	1	24.91	1.66	1	1	1.08
Q95Y26	CELE_Y41D4A.5	Protein-tyrosine-phosphatase OS=Caenorhabditis elegans GN=CELE_Y41D4A.5 PE=1 SV=2 - [Q95Y26_CAEEL]					53.88	3.2	1	1	29.82	2.35	1	1	1.08
Q8I4I3	CELE_F49E2.5	Uncharacterized protein OS=Caenorhabditis elegans GN=CELE_F49E2.5 PE=1 SV=1 - [Q8I4I3_CAEEL]					24.01	3.22	1	1	41.1	3.22	1	1	1.08
Q9XWW2	mrg-1	MRG (Mortality factor-Related Gene) related OS=Caenorhabditis elegans GN=mrg-1 PE=1 SV=1 - [Q9XWW2_CAEEL]					26.2	3.28	1	1	43.77	3.28	1	1	1.08
P90849	cco-1	Cytochrome C Oxidase OS=Caenorhabditis elegans GN=cco-1 PE=1 SV=1 - [P90849_CAEEL]					28.01	9.85	1	1	25.34	9.85	1	1	1.08
A0A0K3AWK1	pgp-2	P-GlycoProtein related OS=Caenorhabditis elegans GN=pgp-2 PE=1 SV=1 - [A0A0K3AWK1_CAEEL]					35.14	0.95	1	1	42.2	0.95	1	1	1.08
Q95Y97	rpa-2	Replication Protein A homolog OS=Caenorhabditis elegans GN=rpa-2 PE=1 SV=1 - [Q95Y97_CAEEL]					37.33	5.9	1	1	38.87	7.29	1	1	1.08
O76387	C24G6.8	Probable peptidyl-tRNA hydrolase 2 OS=Caenorhabditis elegans GN=C24G6.8 PE=3 SV=1 - [PTH2_CAEEL]					77.14	6.33	1	1	79.14	6.33	1	1	1.08
Q20220	CELE_F40F4.7	Uncharacterized protein OS=Caenorhabditis elegans GN=CELE_F40F4.7 PE=1 SV=4 - [Q20220_CAEEL]					47.18	5.71	1	1	78.53	5.71	1	1	1.08
O45830	ndx-1	Putative nudix hydrolase 1 OS=Caenorhabditis elegans GN=ndx-1 PE=3 SV=1 - [NDX1_CAEEL]					24.15	3.56	1	1	24.58	2.47	1	1	1.08
I7FN66	rab-7	Rab-7 (Fragment) OS=Caenorhabditis elegans GN=rab-7 PE=2 SV=1 - [I7FN66_CAEEL]					52.57	7.69	1	1	54.56	4.81	1	1	1.08
Q95XN2	mppa-1	Mitochondrial Processing Peptidase Alpha OS=Caenorhabditis elegans GN=mppa-1 PE=1 SV=2 - [Q95XN2_CAEEL]					0	1.95	1	1	0	1.95	1	1	1.08
O16585	CELE_F21E9.2	Uncharacterized protein OS=Caenorhabditis elegans GN=CELE_F21E9.2 PE=4 SV=2 - [O16585_CAEEL]					32.21	4.82	1	1	37.86	4.82	1	1	1.08
Q93339	prp-4	Yeast PRP (Splicing factor) related OS=Caenorhabditis elegans GN=prp-4 PE=1 SV=1 - [Q93339_CAEEL]					46.3	1.81	1	1	26.52	2.02	1	1	1.08
Q5CCI8	srb-19	Serpentine Receptor, class B (Beta) OS=Caenorhabditis elegans GN=srb-19 PE=4 SV=1 - [Q5CCI8_CAEEL]					26.46	2.27	1	1	20.87	2.27	1	1	1.08
Q95QQ5	atic-1	5-Aminoimidazole-4-carboxamide ribonucleotide formylTransferase/IMP Cyclohydrolase homolog OS=Caenorhabditis elegans GN=atic-1 PE=1 SV=3 - [Q95QQ5_CAEEL]					54.83	3.37	1	1	46.89	3.37	1	1	1.08
G5EEY4	mrp-5	Uncharacterized protein OS=Caenorhabditis elegans GN=mrp-5 PE=1 SV=1 - [G5EEY4_CAEEL]					45.49	0.64	1	1	42.07	0.64	1	1	1.08
P49391	mrps-14	Probable 40S ribosomal protein S14, mitochondrial OS=Caenorhabditis elegans GN=mrps-14 PE=3 SV=2 - [RT14_CAEEL]					20.81	8.04	1	1	32.38	5.03	1	1	1.08
O01578	F53F10.3	Probable mitochondrial pyruvate carrier 2 OS=Caenorhabditis elegans GN=F53F10.3 PE=3 SV=2 - [MPC2_CAEEL]					41.66	7.52	1	1	33.74	6.02	1	1	1.08
Q9XUU9	K05C4.2	Protein jagunal homolog OS=Caenorhabditis elegans GN=K05C4.2 PE=3 SV=1 - [JAGN_CAEEL]					25.82	6.35	1	1	61.57	6.35	1	1	1.08
Q09444	ubh-4	Probable ubiquitin carboxyl-terminal hydrolase ubh-4 OS=Caenorhabditis elegans GN=ubh-4 PE=3 SV=2 - [UBH4_CAEEL]					25.18	4.67	1	1	38.14	2.8	1	1	1.08
P90786	prg-1	Piwi-like protein OS=Caenorhabditis elegans GN=prg-1 PE=1 SV=1 - [P90786_CAEEL]					75.92	1.46	1	1	54.7	1.46	1	1	1.08
O17895	haf-3	HAlF transporter (PGP related) OS=Caenorhabditis elegans GN=haf-3 PE=1 SV=2 - [O17895_CAEEL]					35.63	1.35	1	1	46.51	1.35	1	1	1.08
Q23237	pbs-3	Proteasome subunit beta type-3 OS=Caenorhabditis elegans GN=pbs-3 PE=1 SV=1 - [PSB3_CAEEL]					24.34	9.31	1	1	28.71	9.31	1	1	1.08
Q09385	syf-2	Pre-mRNA-splicing factor syf-2 OS=Caenorhabditis elegans GN=syf-2 PE=3 SV=3 - [SYF2_CAEEL]					20.28	5.98	1	1	23.57	5.98	1	1	1.08
Q18195	elpc-4	Putative elongator complex protein 4 OS=Caenorhabditis elegans GN=elpc-4 PE=3 SV=1 - [ELP4_CAEEL]					34.22	3.89	1	1	32.12	3.89	1	1	1.08
Q95PW6	CELE_ZK622.4	Uncharacterized protein OS=Caenorhabditis elegans GN=CELE_ZK622.4 PE=1 SV=2 - [Q95PW6_CAEEL]					27.69	8	1	1	25.09	8	1	1	1.08
Q21649	CELE_R02F2.7	Uncharacterized protein OS=Caenorhabditis elegans GN=CELE_R02F2.7 PE=1 SV=3 - [Q21649_CAEEL]					32.56	1.3	1	1	33.32	1.3	1	1	1.08
Q3V5K9	CELE_Y72A10A.1	Uncharacterized protein OS=Caenorhabditis elegans GN=CELE_Y72A10A.1 PE=1 SV=2 - [Q3V5K9_CAEEL]					44.09	3.52	1	1	31.58	3.52	1	1	1.08
G5EFB4	bpl-1	Biotin Protein Ligase OS=Caenorhabditis elegans GN=bpl-1 PE=1 SV=1 - [G5EFB4_CAEEL]					22.61	1.61	1	1	22.18	1.61	1	1	1.08
G1K110	atgp-2	Amino acid Transporter GlycoProtein subunit OS=Caenorhabditis elegans GN=atgp-2 PE=1 SV=1 - [G1K110_CAEEL]					26.2	6.81	1	1	47.28	5.24	1	1	1.08
Q69ZI6	CELE_T12D8.10	Uncharacterized protein OS=Caenorhabditis elegans GN=CELE_T12D8.10 PE=1 SV=1 - [Q69ZI6_CAEEL]					33.77	15.31	1	1	37	15.31	1	1	1.08
Q18444	grsp-3	Glycine Rich Secreted Protein OS=Caenorhabditis elegans GN=grsp-3 PE=1 SV=1 - [Q18444_CAEEL]					56.59	13.24	1	1	20.62	13.24	1	1	1.08
Q20628	cdd-2	CytiDine Deaminase OS=Caenorhabditis elegans GN=cdd-2 PE=1 SV=1 - [Q20628_CAEEL]					36.59	11.45	1	1	23.78	11.45	1	1	1.08
Q20065	phy-2	Prolyl 4-hydroxylase subunit alpha-2 OS=Caenorhabditis elegans GN=phy-2 PE=1 SV=1 - [P4HA2_CAEEL]	94.8267	4.08	2	3	24.91	1.67	1	1	57.1433	3.53	2	3	1.07
Q21217	gta-1	Probable 4-aminobutyrate aminotransferase, mitochondrial OS=Caenorhabditis elegans GN=gta-1 PE=3 SV=1 - [GABT_CAEEL]	73.92	10.97	3	3	35.8	2.07	1	1	135.66	12.01	3	3	1.07
O44400	F37C4.5	Protein F37C4.5 OS=Caenorhabditis elegans GN=F37C4.5 PE=1 SV=3 - [F37C4_CAEEL]	56.71	6.65	3	3	35.5	2.52	1	1	140.543	6.47	3	3	1.07
Q22169	trap-2	Translocon-associated protein subunit beta OS=Caenorhabditis elegans GN=trap-2 PE=1 SV=1 - [SSRB_CAEEL]	73.5667	29.26	3	3	23.03	4.26	1	1	61.0367	10.64	2	3	1.07
Q2EEM5	uso-1	USO1 (Yeast transport protein) homolog OS=Caenorhabditis elegans GN=uso-1 PE=1 SV=1 - [Q2EEM5_CAEEL]	62.09	2.4	2	3	35.44	1.03	1	1	92.0667	2.63	2	3	1.07
O44444	C02B10.4	Uncharacterized protein OS=Caenorhabditis elegans GN=C02B10.4 PE=1 SV=1 - [O44444_CAEEL]	61.58	19.43	3	3	35.83	13.27	1	1	41.4485	17.06	3	3	1.07
Q09289	C56G2.7	Proteasomal ubiquitin receptor ADRM1 homolog OS=Caenorhabditis elegans GN=C56G2.7 PE=3 SV=2 - [ADRM1_CAEEL]	68.5621	12.03	3	3	0	1.87	1	1	52.7288	12.03	3	3	1.07
P91390	ostd-1	Dolichyl-diphosphooligosaccharide--protein glycosyltransferase subunit 2 OS=Caenorhabditis elegans GN=ostd-1 PE=3 SV=1 - [RPN2_CAEEL]	53.3046	9.29	2	3	36.84	6.07	1	1	42.0967	11.79	3	3	1.07
Q23591	CELE_ZK792.5	Uncharacterized protein OS=Caenorhabditis elegans GN=CELE_ZK792.5 PE=1 SV=2 - [Q23591_CAEEL]	51.192	4.96	3	3	39.23	1.71	1	1	82.2333	4.5	3	3	1.07
A7DT40	CELE_F49D11.10	Uncharacterized protein OS=Caenorhabditis elegans GN=CELE_F49D11.10 PE=1 SV=2 - [A7DT40_CAEEL]	90.9367	4.95	3	3	27.51	1.24	1	1	90.3467	7.84	3	3	1.07
Q9U3C8	dcn-1	Defective in cullin neddylation protein 1 OS=Caenorhabditis elegans GN=dcn-1 PE=1 SV=2 - [DCN1_CAEEL]	101.027	7.12	2	3	31.31	2.37	1	1	124.483	11.86	3	3	1.07
Q95QV7	tiar-1	TIA-1/TIAL RNA binding protein homolog OS=Caenorhabditis elegans GN=tiar-1 PE=1 SV=1 - [Q95QV7_CAEEL]	127.309	7.71	2	3	77.62	4.26	1	1	185.623	15.16	3	3	1.07
Q23155	mrps-11	Mitochondrial Ribosomal Protein, Small OS=Caenorhabditis elegans GN=mrps-11 PE=1 SV=1 - [Q23155_CAEEL]	140.2	29.33	3	3	26.49	8.17	1	1	184.166	29.33	3	3	1.07
Q09603	ech-4	Enoyl-CoA Hydratase OS=Caenorhabditis elegans GN=ech-4 PE=1 SV=1 - [Q09603_CAEEL]	28.11	3.64	1	1	87.8933	17.4	5	6	188.25	20.78	6	6	1.07
Q21568	M28.5	NHP2-like protein 1 homolog OS=Caenorhabditis elegans GN=M28.5 PE=3 SV=1 - [NH2L1_CAEEL]	2325.01	58.59	10	76	1546.25	50	6	46	3023.81	84.38	14	92	1.07
P34540	unc-116	Kinesin heavy chain OS=Caenorhabditis elegans GN=unc-116 PE=2 SV=2 - [KINH_CAEEL]	165.355	9.57	8	9	240.291	11.04	7	9	327.912	15.58	12	14	1.07
Q20585	rpn-7	26S proteasome non-ATPase regulatory subunit 6 OS=Caenorhabditis elegans GN=rpn-7 PE=3 SV=1 - [PSMD6_CAEEL]	343.062	24.39	8	14	116.009	11.71	4	5	485.123	31.95	13	14	1.07
Q18674	C47E12.7	Ribosomal RNA processing protein 1 homolog OS=Caenorhabditis elegans GN=C47E12.7 PE=3 SV=2 - [RRP1_CAEEL]	280.96	24.69	10	14	156.351	15.11	5	5	469.072	16.12	8	14	1.07
G5EF05	CELE_W07E11.1	Uncharacterized protein OS=Caenorhabditis elegans GN=CELE_W07E11.1 PE=1 SV=1 - [G5EF05_CAEEL]	171.255	4.46	8	9	39.82	0.92	2	2	186.577	3.54	7	8	1.07
Q19519	vps-36	Related to yeast Vacuolar Protein Sorting factor OS=Caenorhabditis elegans GN=vps-36 PE=1 SV=2 - [Q19519_CAEEL]	54.37	5.74	2	2	124.9	12.53	3	3	208.02	16.19	4	4	1.06
Q9U296	men-1	Malic enzyme OS=Caenorhabditis elegans GN=men-1 PE=1 SV=1 - [Q9U296_CAEEL]	156.557	12.26	6	6	31.61	2.1	1	1	168.53	10	5	5	1.06
Q9U1X9	rla-2	Ribosomal protein, Large subunit, Acidic (P1) OS=Caenorhabditis elegans GN=rla-2 PE=1 SV=1 - [Q9U1X9_CAEEL]	224.107	74.55	4	6	76.82	14.55	1	1	300.01	39.09	4	5	1.06
G4SPY1	Y71G10AL.1	Uncharacterized protein OS=Caenorhabditis elegans GN=Y71G10AL.1 PE=1 SV=2 - [G4SPY1_CAEEL]	529.107	22.63	12	28	764.998	17.6	12	29	1164.39	22.93	14	44	1.06
B3CJ34	gcn-1	GCN (Yeast General Control Nondrepressible) homolog OS=Caenorhabditis elegans GN=gcn-1 PE=1 SV=2 - [B3CJ34_CAEEL]	691.879	9.92	23	35	107.21	2.34	5	5	538.102	8.83	21	28	1.06
O17695	hda-1	Histone deacetylase 1 OS=Caenorhabditis elegans GN=hda-1 PE=1 SV=1 - [HDA1_CAEEL]	111.055	19.52	7	9	350.508	25.16	9	15	313.356	26.25	9	19	1.06
Q20774	dnj-13	DNaJ domain (Prokaryotic heat shock protein) OS=Caenorhabditis elegans GN=dnj-13 PE=1 SV=1 - [Q20774_CAEEL]	350.184	17.52	5	9	219.574	18.13	4	8	500.385	24.17	7	13	1.06
O02286	pck-2	Phosphoenolypyruvate CarboxyKinase OS=Caenorhabditis elegans GN=pck-2 PE=1 SV=1 - [O02286_CAEEL]	1447.04	35.17	20	60	1369.5	38.53	21	54	2445.53	45.26	24	86	1.05
Q8MXJ1	CELE_T23E7.2	Uncharacterized protein OS=Caenorhabditis elegans GN=CELE_T23E7.2 PE=1 SV=1 - [Q8MXJ1_CAEEL]	901.121	16.3	12	29	483.639	8.81	6	18	1051.59	20.7	15	35	1.05
P53596	C05G5.4	Probable succinyl-CoA ligase [ADP/GDP-forming] subunit alpha, mitochondrial OS=Caenorhabditis elegans GN=C05G5.4 PE=3 SV=1 - [SUCA_CAEEL]	616.71	38.82	12	20	715.213	39.13	13	23	1342.74	46.58	15	33	1.05
P49180	rpl-33	60S ribosomal protein L35a OS=Caenorhabditis elegans GN=rpl-33 PE=1 SV=3 - [RL35A_CAEEL]	406.017	62.1	10	22	236.228	53.23	8	13	461.518	62.9	13	26	1.05
Q9NA71	CELE_Y57A10A.31	Uncharacterized protein OS=Caenorhabditis elegans GN=CELE_Y57A10A.31 PE=1 SV=2 - [Q9NA71_CAEEL]	488.912	16.69	18	29	81.33	3.05	4	4	486.318	15.08	17	23	1.05
Q9UAN9	nra-4	Nicotinic Receptor Associated OS=Caenorhabditis elegans GN=nra-4 PE=1 SV=2 - [Q9UAN9_CAEEL]	197.949	9.55	9	10	251.5	13.2	12	12	435.638	16.32	14	17	1.05
I2HAJ2	rpl-30	Ribosomal Protein, Large subunit OS=Caenorhabditis elegans GN=rpl-30 PE=1 SV=1 - [I2HAJ2_CAEEL]	376.52	35.11	5	13	181.25	22.34	3	5	403.522	79.79	6	13	1.05
Q09979	dhs-6	DeHydrogenases, Short chain OS=Caenorhabditis elegans GN=dhs-6 PE=1 SV=3 - [Q09979_CAEEL]	113.569	19.62	7	7	79.17	14.11	5	5	202.734	20.57	8	9	1.05
O45430	mccc-1	MethylCrotonoyl-Coenzyme A Carboxylase (Alpha) OS=Caenorhabditis elegans GN=mccc-1 PE=1 SV=2 - [O45430_CAEEL]	89.8659	5.81	4	4	103.41	5.81	4	5	190.397	7.75	6	7	1.05
Q21793	pqn-53	Prion-like-(Q/N-rich)-domain-bearing protein OS=Caenorhabditis elegans GN=pqn-53 PE=1 SV=2 - [Q21793_CAEEL]	185.75	10.53	4	4	90.33	15.24	5	5	165.441	26.87	7	7	1.05
Q9GZH2	ruvb-2	RuvB-like 2 OS=Caenorhabditis elegans GN=ruvb-2 PE=1 SV=1 - [RUVB2_CAEEL]	155	11.38	4	5	87.96	9.15	3	3	202.48	13.17	6	6	1.05
H2L048	CELE_F46H5.7	Uncharacterized protein OS=Caenorhabditis elegans GN=CELE_F46H5.7 PE=1 SV=1 - [H2L048_CAEEL]	121.757	8.92	5	5	114.373	3.85	2	3	185.031	6.99	5	6	1.05
P91502	usp-5	Ubiquitin carboxyl-terminal hydrolase OS=Caenorhabditis elegans GN=usp-5 PE=1 SV=2 - [P91502_CAEEL]	79.67	4.82	4	5	51.49	3.93	3	3	134.427	11.66	6	6	1.05
Q19706	eif-3.G	Eukaryotic translation initiation factor 3 subunit G OS=Caenorhabditis elegans GN=eif-3.G PE=3 SV=2 - [EIF3G_CAEEL]	132.71	29.01	5	5	95.7467	17.94	3	3	156.383	23.28	6	6	1.05
P54889	alh-13	Probable delta-1-pyrroline-5-carboxylate synthase OS=Caenorhabditis elegans GN=alh-13 PE=3 SV=2 - [ALH13_CAEEL]	203.63	6.61	4	6	157.839	10.1	6	7	245.023	13.72	9	10	1.04
E3W743	hpo-34	Uncharacterized protein OS=Caenorhabditis elegans GN=hpo-34 PE=1 SV=1 - [E3W743_CAEEL]	191.383	6.31	5	6	190.733	6.53	5	7	227.63	7.42	7	10	1.04
Q17334	sodh-1	Alcohol dehydrogenase 1 OS=Caenorhabditis elegans GN=sodh-1 PE=2 SV=2 - [ADH1_CAEEL]	808.113	48.14	16	30	1692.39	51.29	18	50	2131.95	73.35	25	62	1.04
Q9BL19	rpl-17	60S ribosomal protein L17 OS=Caenorhabditis elegans GN=rpl-17 PE=3 SV=1 - [RL17_CAEEL]	715.645	43.32	13	33	576.698	43.85	12	25	1021.35	60.43	15	43	1.04
Q9BKU5	CELE_Y37E3.8	Uncharacterized protein OS=Caenorhabditis elegans GN=CELE_Y37E3.8 PE=1 SV=1 - [Q9BKU5_CAEEL]	279.922	31.03	6	18	410.605	40.69	9	26	707.587	66.21	13	34	1.04
Q94261	cif-1	COP9/Signalosome and eIF3 complex-shared subunit 1 OS=Caenorhabditis elegans GN=cif-1 PE=1 SV=1 - [EIF3M_CAEEL]	546.818	30	12	19	295.438	27.18	9	11	554.31	32.05	14	22	1.04
Q20779	tag-174	Probable cytochrome c oxidase subunit 6A, mitochondrial OS=Caenorhabditis elegans GN=tag-174 PE=3 SV=1 - [COX6A_CAEEL]	265.79	45.31	4	8	269.149	58.59	7	9	336.04	58.59	7	13	1.04
P46576	gop-3	SAM50-like protein gop-3 OS=Caenorhabditis elegans GN=gop-3 PE=2 SV=2 - [SAM50_CAEEL]	54.7633	6.22	3	3					84.54	5.99	2	2	1.03
Q20025	pfn-2	Profilin-2 OS=Caenorhabditis elegans GN=pfn-2 PE=2 SV=3 - [PROF2_CAEEL]	69.9967	32.06	2	3					89.91	32.06	2	2	1.03
G5ED26	mel-46	MEL-46 OS=Caenorhabditis elegans GN=mel-46 PE=1 SV=1 - [G5ED26_CAEEL]	43.2867	2.98	3	3					29.3	1.54	2	2	1.03
O61741	B0205.6	Uncharacterized protein OS=Caenorhabditis elegans GN=B0205.6 PE=1 SV=2 - [O61741_CAEEL]	140.647	10.92	3	3					48.8	5.34	2	2	1.03
A5Z2S4	saps-1	SAPS (Phosphatase associated) domain protein OS=Caenorhabditis elegans GN=saps-1 PE=1 SV=1 - [A5Z2S4_CAEEL]	91.16	4.04	3	3					36.42	2.65	2	2	1.03
Q65ZH5	egal-1	EGALitarian (Drosophila exonuclease-like) homolog OS=Caenorhabditis elegans GN=egal-1 PE=1 SV=1 - [Q65ZH5_CAEEL]	32.5361	4.04	3	3					29.57	2.46	2	2	1.03
Q8MPX3	dnj-20	DnaJ homolog dnj-20 OS=Caenorhabditis elegans GN=dnj-20 PE=3 SV=2 - [DNJ20_CAEEL]	23.87	8.45	2	3					43.16	6.48	2	2	1.03
Q9XWG2	CELE_Y63D3A.7	Uncharacterized protein OS=Caenorhabditis elegans GN=CELE_Y63D3A.7 PE=1 SV=2 - [Q9XWG2_CAEEL]	55.52	38.04	3	3		0			68.19	25	2	2	1.03
G5EDK1	asc-1	ASC-1 OS=Caenorhabditis elegans GN=asc-1 PE=1 SV=1 - [G5EDK1_CAEEL]	70.1833	8	3	3					47.01	5.18	2	2	1.03
O61965	CELE_F26D11.2	Uncharacterized protein OS=Caenorhabditis elegans GN=CELE_F26D11.2 PE=4 SV=1 - [O61965_CAEEL]	99.86	5.99	2	3					39.43	4.95	2	2	1.03
Q09489	C32D5.8	Uncharacterized protein OS=Caenorhabditis elegans GN=C32D5.8 PE=1 SV=1 - [Q09489_CAEEL]	75.98	25	2	3					67.44	25	2	2	1.03
Q18625	lec-4	Galectin OS=Caenorhabditis elegans GN=lec-4 PE=1 SV=1 - [Q18625_CAEEL]	130.236	22.61	6	6	104.693	22.61	6	6	134.66	32.51	7	9	1.03
P52819	rpl-22	60S ribosomal protein L22 OS=Caenorhabditis elegans GN=rpl-22 PE=1 SV=3 - [RL22_CAEEL]	1025.76	66.15	11	29	838.049	71.54	14	30	1246.05	71.54	15	44	1.03
O44906	pck-1	Phosphoenolypyruvate CarboxyKinase OS=Caenorhabditis elegans GN=pck-1 PE=1 SV=2 - [O44906_CAEEL]	804.147	28.11	16	34	464.58	21.97	12	21	1010.95	33.79	20	40	1.03
Q21153	K02F3.2	Probable calcium-binding mitochondrial carrier K02F3.2 OS=Caenorhabditis elegans GN=K02F3.2 PE=3 SV=3 - [CMC1_CAEEL]	225.385	13.97	9	11	496.49	24.86	16	20	642.277	27.37	17	24	1.03
Q9TYL9	copb-1	Coatomer subunit beta OS=Caenorhabditis elegans GN=copb-1 PE=1 SV=1 - [Q9TYL9_CAEEL]	406.33	20.39	14	19	211.171	13.7	9	10	507.732	20.7	15	21	1.03
Q9XVE9	rpl-14	Ribosomal Protein, Large subunit OS=Caenorhabditis elegans GN=rpl-14 PE=1 SV=1 - [Q9XVE9_CAEEL]	440.454	57.04	10	16	311.216	30.37	5	10	578.258	51.11	11	19	1.03
G5EFK4	arf-3	ADP-Ribosylation Factor related OS=Caenorhabditis elegans GN=arf-3 PE=1 SV=1 - [G5EFK4_CAEEL]	186.547	43.33	5	7	289.274	51.11	7	10	389.427	56.67	9	13	1.03
Q95X44	vha-8	Vacuolar H ATPase OS=Caenorhabditis elegans GN=vha-8 PE=1 SV=1 - [Q95X44_CAEEL]	288.613	44.25	7	9	173.913	26.55	5	6	312.033	39.82	9	11	1.03
G5EFS2	msi-1	MuSashI (Fly neural) family OS=Caenorhabditis elegans GN=msi-1 PE=1 SV=1 - [G5EFS2_CAEEL]	468.12	18.75	4	10	91.26	15.63	3	4	353.903	24.38	5	10	1.03
Q9U1Y6	dhs-24	DeHydrogenases, Short chain OS=Caenorhabditis elegans GN=dhs-24 PE=1 SV=3 - [Q9U1Y6_CAEEL]	263.836	21.35	7	7	133.72	15.36	4	4	303.835	23.18	7	8	1.03
Q20053	asb-1	ATP Synthase B homolog OS=Caenorhabditis elegans GN=asb-1 PE=1 SV=1 - [Q20053_CAEEL]	79.43	16.61	4	4	93.644	14.95	4	4	121.172	16.94	6	6	1.03
P34343	npp-15	Nuclear pore complex protein 15 OS=Caenorhabditis elegans GN=npp-15 PE=3 SV=4 - [NU133_CAEEL]	64.3974	3.81	4	5	58.04	2.48	2	2	137.61	4.78	5	5	1.03
Q9GYR5	C23G10.8	Uncharacterized protein OS=Caenorhabditis elegans GN=C23G10.8 PE=1 SV=1 - [Q9GYR5_CAEEL]	61.6566	5.55	5	5	33.56	1.81	2	2	73.5475	5.44	4	5	1.03
Q09629	ZK673.2	Probable adenylate kinase isoenzyme ZK673.2 OS=Caenorhabditis elegans GN=ZK673.2 PE=3 SV=1 - [KADY_CAEEL]	117.94	12.61	2	2	118.96	12.61	2	2	164.843	12.61	2	3	1.02
O45679	cysl-2	Bifunctional L-3-cyanoalanine synthase/cysteine synthase OS=Caenorhabditis elegans GN=cysl-2 PE=1 SV=1 - [CYSK2_CAEEL]	52.14	8.01	2	2	82.4527	5.93	2	2	68.7567	12.76	3	3	1.02
O44664	nlp-29	Neuropeptide-like protein 29 OS=Caenorhabditis elegans GN=nlp-29 PE=2 SV=1 - [NLP29_CAEEL]	35.48	13.7	1	2	39.79	46.58	2	2	43.68	46.58	2	3	1.02
Q76NP4	lin-40	Uncharacterized protein OS=Caenorhabditis elegans GN=lin-40 PE=1 SV=1 - [Q76NP4_CAEEL]	27.03	4.37	2	2	55.84	2.99	2	2	118.227	5.17	3	3	1.02
Q8MQB0	tbc-7	TBC (Tre-2/Bub2/Cdc16) domain family OS=Caenorhabditis elegans GN=tbc-7 PE=1 SV=1 - [Q8MQB0_CAEEL]	44.2695	2.5	2	2	25.7295	2.5	2	2	42.5895	4.38	3	3	1.02
Q19901	hum-1	Heavy chain, Unconventional Myosin OS=Caenorhabditis elegans GN=hum-1 PE=1 SV=1 - [Q19901_CAEEL]	81.32	2.18	2	2	76.99	2	2	2	108.143	2.91	3	3	1.02
Q8MQE2	pkg-2	Protein Kinase, cGMP-dependent OS=Caenorhabditis elegans GN=pkg-2 PE=3 SV=2 - [Q8MQE2_CAEEL]	33.54	2.33	1	2	39.77	2.33	1	2	54.2867	5.52	3	3	1.02
Q9N4U1	CELE_Y49F6B.2	Uncharacterized protein OS=Caenorhabditis elegans GN=CELE_Y49F6B.2 PE=1 SV=1 - [Q9N4U1_CAEEL]	69.36	8.73	2	2	55.3531	7.14	2	2	38.86	9.52	3	3	1.02
Q93565	tli-1	ToLlIp homolog OS=Caenorhabditis elegans GN=tli-1 PE=1 SV=2 - [Q93565_CAEEL]	108.23	13.58	2	2	111.54	13.58	2	2	160.3	13.58	2	3	1.02
Q23368	sec-24.2	Yeast SEC homolog OS=Caenorhabditis elegans GN=sec-24.2 PE=1 SV=3 - [Q23368_CAEEL]	46.62	1.22	1	1	148.36	3.96	3	4	110.83	3.86	3	4	1.02
Q9N368	CELE_Y55F3AM.3	Uncharacterized protein OS=Caenorhabditis elegans GN=CELE_Y55F3AM.3 PE=1 SV=2 - [Q9N368_CAEEL]	3915.56	35.86	27	184	3598.94	35.34	28	162	6250.1	44.48	35	253	1.02
P46561	atp-2	ATP synthase subunit beta, mitochondrial OS=Caenorhabditis elegans GN=atp-2 PE=1 SV=2 - [ATPB_CAEEL]	3923.43	57.62	22	116	4000.51	51.12	21	116	6881.41	74.35	28	172	1.02
P29691	eef-2	Elongation factor 2 OS=Caenorhabditis elegans GN=eef-2 PE=2 SV=4 - [EF2_CAEEL]	2688.92	39.32	36	103	2448.66	42.96	35	85	4036.1	52.58	47	138	1.02
P51403	rps-2	40S ribosomal protein S2 OS=Caenorhabditis elegans GN=rps-2 PE=3 SV=1 - [RS2_CAEEL]	1249.46	45.96	16	50	1544.29	53.31	19	60	2769.88	60.66	23	82	1.02
Q18990	pyr-1	PYRimidine biosynthesis OS=Caenorhabditis elegans GN=pyr-1 PE=1 SV=2 - [Q18990_CAEEL]	455.212	6.28	12	18	433.092	5.41	10	16	671.807	8.83	17	25	1.02
Q11067	tag-320	Probable protein disulfide-isomerase A6 OS=Caenorhabditis elegans GN=tag-320 PE=3 SV=1 - [PDIA6_CAEEL]	734.533	36.36	11	16	358.095	16.36	4	8	863.975	33.64	10	17	1.02
A9UJN7	maph-1.2	Microtubule-Associated Protein Homolog OS=Caenorhabditis elegans GN=maph-1.2 PE=1 SV=1 - [A9UJN7_CAEEL]	138.019	7.32	5	6	138.15	5.61	4	5	196.285	11.21	6	8	1.01
P27639	inf-1	Eukaryotic initiation factor 4A OS=Caenorhabditis elegans GN=inf-1 PE=2 SV=1 - [IF4A_CAEEL]	2030.25	52.99	21	58	2457.75	57.71	21	64	3368.12	80.85	29	90	1.01
G5ED33	eps-8	EPS (Human endocytosis) related OS=Caenorhabditis elegans GN=eps-8 PE=1 SV=1 - [G5ED33_CAEEL]	1340.28	30.21	23	50	1033.33	27.15	22	42	2101.84	30.86	26	67	1.01
Q9XVP0	rps-15	40S ribosomal protein S15 OS=Caenorhabditis elegans GN=rps-15 PE=1 SV=3 - [RS15_CAEEL]	905.239	45.7	7	27	749.175	54.97	7	24	1374.21	66.23	10	37	1.01
P91240	srpa-72	Signal recognition particle subunit SRP72 OS=Caenorhabditis elegans GN=srpa-72 PE=3 SV=2 - [SRP72_CAEEL]	400.117	19.69	10	13	349.781	20.94	10	13	605.684	28.98	15	19	1.01
P34640	ZK512.2	Probable ATP-dependent RNA helicase DDX55 homolog OS=Caenorhabditis elegans GN=ZK512.2 PE=3 SV=2 - [DDX55_CAEEL]	317.978	13.15	9	16	187.401	9.52	5	7	297.602	9.52	7	16	1.01
Q22716	rpl-32	Ribosomal Protein, Large subunit OS=Caenorhabditis elegans GN=rpl-32 PE=1 SV=1 - [Q22716_CAEEL]	318.076	42.54	7	16	254.47	30.6	4	7	601.112	39.55	6	16	1.01
O18033	nra-2	Nicalin OS=Caenorhabditis elegans GN=nra-2 PE=1 SV=1 - [O18033_CAEEL]	309.149	23.52	9	11	199.573	9.52	4	6	334.207	21.01	8	12	1.01
O18036	CELE_T05F1.4	Uncharacterized protein OS=Caenorhabditis elegans GN=CELE_T05F1.4 PE=4 SV=1 - [O18036_CAEEL]	191.781	42.36	8	13	70.27	5.91	1	2	205.226	38.92	7	10	1.01
O45279	C30H6.7	Uncharacterized protein OS=Caenorhabditis elegans GN=C30H6.7 PE=1 SV=1 - [O45279_CAEEL]	184.02	23.44	7	7	117.357	10.39	3	3	204.968	19.88	6	7	1.01
Q93425	mrps-5	Putative 28S ribosomal protein S5, mitochondrial OS=Caenorhabditis elegans GN=mrps-5 PE=3 SV=3 - [RT05_CAEEL]	155.847	7.11	3	5	36.82	3.44	1	1	107.65	8.03	3	4	1
Q21525	CELE_M05D6.6	Uncharacterized protein OS=Caenorhabditis elegans GN=CELE_M05D6.6 PE=1 SV=1 - [Q21525_CAEEL]	255.03	19.88	3	5	45.95	9.94	1	1	232.44	24.22	4	4	1
G5EFI4	lec-5	Galectin OS=Caenorhabditis elegans GN=lec-5 PE=1 SV=1 - [G5EFI4_CAEEL]	54.62	7.01	2	2	134.321	24.2	7	7	113.3	20.7	6	7	1
Q19626	vha-12	Probable V-type proton ATPase subunit B OS=Caenorhabditis elegans GN=vha-12 PE=3 SV=1 - [VATB_CAEEL]	1053.52	35.44	14	42	947.62	31.36	14	36	1550.39	44.4	17	56	1
Q93714	idha-1	Probable isocitrate dehydrogenase [NAD] subunit alpha, mitochondrial OS=Caenorhabditis elegans GN=idha-1 PE=3 SV=3 - [IDH3A_CAEEL]	1175.35	47.49	15	35	806.988	44.41	15	29	1481.33	57.54	20	46	1
Q20168	copb-2	Probable coatomer subunit beta' OS=Caenorhabditis elegans GN=copb-2 PE=3 SV=3 - [COPB2_CAEEL]	718.047	24.2	20	28	502.042	19.5	16	21	959.958	29	23	35	1
Q7JL40	pyk-1	Pyruvate kinase OS=Caenorhabditis elegans GN=pyk-1 PE=1 SV=1 - [Q7JL40_CAEEL]	425.328	27.68	13	22	446.796	23.16	10	21	716.7	41.81	18	31	1
Q9N5R9	spt-16	FACT complex subunit spt-16 OS=Caenorhabditis elegans GN=spt-16 PE=3 SV=1 - [SPT16_CAEEL]	540.324	19.9	18	26	235.916	13.2	12	14	817.433	24.76	22	28	1
Q19869	rpl-26	60S ribosomal protein L26 OS=Caenorhabditis elegans GN=rpl-26 PE=3 SV=1 - [RL26_CAEEL]	450.25	38.73	8	19	415.936	40.14	8	17	722.656	53.52	11	26	1
Q27274	rop-1	60 kDa SS-A/Ro ribonucleoprotein homolog OS=Caenorhabditis elegans GN=rop-1 PE=2 SV=1 - [RO60_CAEEL]	430.024	26.28	14	22	230.592	17.42	8	11	539.997	27.99	17	23	1
Q22498	T14G10.5	Probable coatomer subunit gamma OS=Caenorhabditis elegans GN=T14G10.5 PE=3 SV=1 - [COPG_CAEEL]	407.192	15.75	13	19	247.64	12.07	9	11	547.558	19.77	15	21	1
Q8WQA8	rps-20	Ribosomal Protein, Small subunit OS=Caenorhabditis elegans GN=rps-20 PE=1 SV=1 - [Q8WQA8_CAEEL]	419.394	38.46	5	13	229.444	37.61	4	7	497.296	54.7	8	14	1
Q9TXI4	CELE_F23C8.5	Uncharacterized protein OS=Caenorhabditis elegans GN=CELE_F23C8.5 PE=1 SV=2 - [Q9TXI4_CAEEL]	417.834	39.61	7	9	258.057	40	7	9	389.451	41.96	8	13	1
Q19554	abcf-1	ABC transporter, class F OS=Caenorhabditis elegans GN=abcf-1 PE=1 SV=1 - [Q19554_CAEEL]	140.08	6.27	4	4	99.72	3.86	3	3	191.43	9.32	5	5	1
Q22037	hrp-1	Heterogeneous nuclear ribonucleoprotein A1 OS=Caenorhabditis elegans GN=hrp-1 PE=1 SV=1 - [ROA1_CAEEL]	148.1	8.09	3	4	104.87	9.54	3	3	171.93	14.45	4	5	1
G5EEZ0	CELE_ZK1010.2	Uncharacterized protein OS=Caenorhabditis elegans GN=CELE_ZK1010.2 PE=1 SV=1 - [G5EEZ0_CAEEL]	114.52	13.1	4	4	48.1	9.89	3	3	130.481	14.71	4	5	1
O16487	B0238.11	Uncharacterized protein OS=Caenorhabditis elegans GN=B0238.11 PE=1 SV=1 - [O16487_CAEEL]	147.538	12.3	4	6	154.52	14.51	4	4	276.183	10.41	4	7	0.99
Q9XUW5	ddx-17	DEAD boX helicase homolog OS=Caenorhabditis elegans GN=ddx-17 PE=1 SV=1 - [Q9XUW5_CAEEL]	3336.06	55.44	36	124	2601.07	55.26	35	97	4446.31	61.14	38	156	0.99
Q9N4I4	rpl-10a	60S ribosomal protein L10a OS=Caenorhabditis elegans GN=rpl-10a PE=3 SV=1 - [RL10A_CAEEL]	993.894	31.02	7	27	588.429	47.22	8	20	921.952	48.61	12	33	0.99
O61815	B0511.6	Uncharacterized protein OS=Caenorhabditis elegans GN=B0511.6 PE=1 SV=2 - [O61815_CAEEL]	868.632	27.02	13	28	577.936	24.08	10	19	1065.82	37.68	16	33	0.99
Q9XVR8	nola-3	Putative H/ACA ribonucleoprotein complex subunit 3 OS=Caenorhabditis elegans GN=nola-3 PE=3 SV=2 - [NOP10_CAEEL]	1035.33	70.31	6	28	633.137	68.75	5	18	1086.5	76.56	7	32	0.99
Q8T3D2	CELE_T08G11.1	Uncharacterized protein OS=Caenorhabditis elegans GN=CELE_T08G11.1 PE=1 SV=1 - [Q8T3D2_CAEEL]	431.565	4.74	15	21	349.026	4.11	12	16	567.161	6.66	20	26	0.99
Q19969	ima-3	Importin subunit alpha-3 OS=Caenorhabditis elegans GN=ima-3 PE=1 SV=2 - [IMA3_CAEEL]	443.927	15.18	4	12	294.985	10.7	3	8	713.16	15.18	4	14	0.99
Q9XWD1	acs-5	Fatty Acid CoA Synthetase family OS=Caenorhabditis elegans GN=acs-5 PE=1 SV=1 - [Q9XWD1_CAEEL]	94.98	7.86	4	4	227.711	10.77	6	7	184.857	12.08	7	8	0.98
Q21067	ifc-2	Intermediate filament protein ifc-2 OS=Caenorhabditis elegans GN=ifc-2 PE=2 SV=3 - [IFC2_CAEEL]	693.702	32.48	24	36	1001.38	36.01	26	46	1284.14	44.05	31	59	0.98
P40614	F01G4.6	Phosphate carrier protein, mitochondrial OS=Caenorhabditis elegans GN=F01G4.6 PE=2 SV=1 - [MPCP_CAEEL]	1542.01	43.82	14	47	1096.76	43.82	13	35	1841.84	54.12	17	57	0.98
P34517	gpdh-2	Probable glycerol-3-phosphate dehydrogenase 2 OS=Caenorhabditis elegans GN=gpdh-2 PE=3 SV=2 - [GPDH2_CAEEL]	556.166	22.19	10	18	686.193	29.85	13	26	976.886	45.15	16	32	0.98
Q20206	rps-11	Ribosomal Protein, Small subunit OS=Caenorhabditis elegans GN=rps-11 PE=1 SV=1 - [Q20206_CAEEL]	374.234	52.26	10	19	256.351	48.39	10	19	531.692	67.74	15	27	0.98
Q9TZ65	CELE_F56F11.4	Uncharacterized protein OS=Caenorhabditis elegans GN=CELE_F56F11.4 PE=1 SV=2 - [Q9TZ65_CAEEL]	389.805	20.44	7	12	184.277	16.3	4	7	468.372	24.82	7	13	0.98
O16305	cmd-1	Calmodulin OS=Caenorhabditis elegans GN=cmd-1 PE=1 SV=3 - [CALM_CAEEL]	85.54	22.15	2	2	36.09	11.41	1	1	35.36	16.11	2	2	0.97
Q93243	nas-37	Zinc metalloproteinase nas-37 OS=Caenorhabditis elegans GN=nas-37 PE=1 SV=2 - [NAS37_CAEEL]	73.97	2.75	2	2	38.9	1.44	1	1	92.24	3.01	2	2	0.97
A0A0K3ASW2	gck-1	Germinal Center Kinase family OS=Caenorhabditis elegans GN=gck-1 PE=1 SV=1 - [A0A0K3ASW2_CAEEL]	45.05	3.32	2	2	31.78	1.58	1	1	23.54	2.69	2	2	0.97
O17839	mrpl-54	Mitochondrial Ribosomal Protein, Large OS=Caenorhabditis elegans GN=mrpl-54 PE=1 SV=2 - [O17839_CAEEL]	50.7	21.8	2	2	43.49	12.03	1	1	69.53	21.8	2	2	0.97
O01756	CELE_F55A12.5	Uncharacterized protein OS=Caenorhabditis elegans GN=CELE_F55A12.5 PE=1 SV=2 - [O01756_CAEEL]	43.1	1.08	1	2	30.24	1.56	1	1	70.44	2.63	2	2	0.97
P31161	sod-2	Superoxide dismutase [Mn] 1, mitochondrial OS=Caenorhabditis elegans GN=sod-2 PE=1 SV=1 - [SODM1_CAEEL]	51.21	11.31	2	2	20.95	6.79	1	1	41.1	10.86	2	2	0.97
P90902	gfi-2	GEI-4 (Four) Interacting protein OS=Caenorhabditis elegans GN=gfi-2 PE=1 SV=1 - [P90902_CAEEL]	48.85	5.04	2	2	36.84	2.52	1	1	45.41	4.2	2	2	0.97
W6RY49	C53H9.2	Uncharacterized protein OS=Caenorhabditis elegans GN=C53H9.2 PE=1 SV=1 - [W6RY49_CAEEL]	46.4136	3.37	2	2	21.62	1.44	1	1	52.85	5.29	2	2	0.97
P49596	ppm-2	Probable protein phosphatase 2C T23F11.1 OS=Caenorhabditis elegans GN=ppm-2 PE=3 SV=2 - [PP2C2_CAEEL]	29.61	5.62	2	2	30.42	2.25	1	1	34.04	5.06	2	2	0.97
G5EFC8	dap-3	Mammalian cell Death Associated Protein related OS=Caenorhabditis elegans GN=dap-3 PE=1 SV=1 - [G5EFC8_CAEEL]	71.21	6.67	2	2	71.69	3.73	1	1	61.74	6.67	2	2	0.97
Q9U2F5	tiar-2	TIA-1/TIAL RNA binding protein homolog OS=Caenorhabditis elegans GN=tiar-2 PE=1 SV=1 - [Q9U2F5_CAEEL]	135.47	5.53	2	2	41.63	1.84	1	1	83.49	6.68	2	2	0.97
Q965K3	dpf-3	Dipeptidyl Peptidase Four (IV) family OS=Caenorhabditis elegans GN=dpf-3 PE=1 SV=1 - [Q965K3_CAEEL]	41.33	2.48	2	2	21.09	1.29	1	1	33.89	2.16	2	2	0.97
Q9GYI1	CELE_F29B9.11	Uncharacterized protein OS=Caenorhabditis elegans GN=CELE_F29B9.11 PE=1 SV=1 - [Q9GYI1_CAEEL]	40.31	26.14	1	2	27.8	26.14	1	1	81	26.14	1	2	0.97
Q965S8	eif-3.I	Eukaryotic translation initiation factor 3 subunit I OS=Caenorhabditis elegans GN=eif-3.I PE=3 SV=2 - [EIF3I_CAEEL]	128.277	14.68	4	6	65.1567	8.87	3	3	140.758	19.27	6	6	0.97
Q19537	rpa-1	Probable replication factor A 73 kDa subunit OS=Caenorhabditis elegans GN=rpa-1 PE=1 SV=1 - [RFA1_CAEEL]	156.82	10.69	5	6	105.183	5.95	3	3	202.693	10.53	4	6	0.97
Q17539	C01B10.8	Uncharacterized protein OS=Caenorhabditis elegans GN=C01B10.8 PE=1 SV=1 - [Q17539_CAEEL]	127.627	8.99	5	6	66.7933	5.34	3	3	207.613	12.35	6	6	0.97
O62107	gale-1	UDP-GALactose 4-Epimerase OS=Caenorhabditis elegans GN=gale-1 PE=1 SV=1 - [O62107_CAEEL]	265.19	15.27	3	6	139.63	15.27	3	3	337.443	21.61	4	6	0.97
O02639	rpl-19	60S ribosomal protein L19 OS=Caenorhabditis elegans GN=rpl-19 PE=3 SV=1 - [RL19_CAEEL]	486.148	30.81	11	21	544.539	26.26	11	23	704.927	35.86	14	31	0.97
Q17489	unc-44	Uncharacterized protein OS=Caenorhabditis elegans GN=unc-44 PE=1 SV=2 - [Q17489_CAEEL]	595.436	36.28	9	17	569.967	36.28	8	16	866.132	60.57	13	23	0.97
P39055	dyn-1	Dynamin OS=Caenorhabditis elegans GN=dyn-1 PE=1 SV=3 - [DYN1_CAEEL]	188.687	13.61	11	16	269.884	13.37	10	13	411.246	18.31	15	20	0.97
Q20221	tba-9	TuBulin, Alpha OS=Caenorhabditis elegans GN=tba-9 PE=1 SV=2 - [Q20221_CAEEL]	150.996	12.5	7	9	186.092	11.4	8	12	479.031	23.9	12	15	0.97
P34815	unc-18	Putative acetylcholine regulator unc-18 OS=Caenorhabditis elegans GN=unc-18 PE=2 SV=3 - [UNC18_CAEEL]	115.16	7.88	5	5	88.43	4.46	3	5	210.858	10.1	6	7	0.97
Q18318	C30B5.4	Uncharacterized protein OS=Caenorhabditis elegans GN=C30B5.4 PE=1 SV=1 - [Q18318_CAEEL]	141.34	16.56	4	5	133.23	13.91	4	5	196.706	16.89	4	7	0.97
Q20173	CELE_F38E9.5	Uncharacterized protein OS=Caenorhabditis elegans GN=CELE_F38E9.5 PE=1 SV=2 - [Q20173_CAEEL]	97.0687	14.11	4	5	102.16	16.82	4	5	249.946	15.92	4	7	0.97
O61793	CELE_R12E2.13	Uncharacterized protein OS=Caenorhabditis elegans GN=CELE_R12E2.13 PE=1 SV=1 - [O61793_CAEEL]	132.733	26.7	3	3	178.91	22.82	3	4	231.77	43.2	5	5	0.97
G5EBZ4	let-418	Protein let-418 OS=Caenorhabditis elegans GN=let-418 PE=1 SV=1 - [LE418_CAEEL]	61.1104	1.42	3	4	39.17	0.87	2	2	60.1066	2.13	4	4	0.97
G5EEH9	npp-10	Nuclear pore complex protein Nup98-Nup96 OS=Caenorhabditis elegans GN=npp-10 PE=2 SV=1 - [NUP98_CAEEL]	89.9	2.62	3	4	28.04	0.95	2	2	92.8067	3.1	4	4	0.97
Q7JMQ6	aqp-2	AQuaPorin or aquaglyceroporin related OS=Caenorhabditis elegans GN=aqp-2 PE=1 SV=1 - [Q7JMQ6_CAEEL]	177.53	5.61	1	4	106.01	5.61	1	2	147.88	5.61	1	4	0.97
Q09646	ham-3	Uncharacterized protein OS=Caenorhabditis elegans GN=ham-3 PE=1 SV=1 - [Q09646_CAEEL]	111.67	9.19	4	4	65.94	4.71	2	2	101.34	5.16	2	4	0.97
Q9TYK1	Y66H1A.4	Probable H/ACA ribonucleoprotein complex subunit 1-like protein OS=Caenorhabditis elegans GN=Y66H1A.4 PE=3 SV=2 - [GAR1_CAEEL]	3181.71	31.56	12	91	4345.91	45.08	14	130	5230.96	45.08	14	157	0.96
P53588	F47B10.1	Probable succinyl-CoA ligase [ADP-forming] subunit beta, mitochondrial OS=Caenorhabditis elegans GN=F47B10.1 PE=3 SV=1 - [SUCB1_CAEEL]	1466.28	36.09	18	49	1250.82	51.72	19	40	2001.41	54.25	23	61	0.96
Q8MXS2	uaf-1	U2AF splicing factor OS=Caenorhabditis elegans GN=uaf-1 PE=1 SV=1 - [Q8MXS2_CAEEL]	1821.16	36.52	12	46	1570.66	36.52	12	42	2485.48	46.5	15	61	0.96
O01159	rsp-7	Probable splicing factor, arginine/serine-rich 7 OS=Caenorhabditis elegans GN=rsp-7 PE=3 SV=3 - [RSP7_CAEEL]	583.588	20.13	8	26	1040.5	27.43	9	40	1354.49	30.75	11	47	0.96
Q9N4J8	cct-3	T-complex protein 1 subunit gamma OS=Caenorhabditis elegans GN=cct-3 PE=1 SV=3 - [Q9N4J8_CAEEL]	504.709	21.36	11	19	250.94	20.44	10	12	481.161	24.49	14	21	0.96
Q22235	enpl-1	Endoplasmin homolog OS=Caenorhabditis elegans GN=enpl-1 PE=3 SV=1 - [ENPL1_CAEEL]	672.394	13.42	9	19	274.348	5.53	4	7	656.641	13.29	10	17	0.96
P54073	F44G4.1	Brix domain-containing protein F44G4.1 OS=Caenorhabditis elegans GN=F44G4.1 PE=3 SV=4 - [YUY1_CAEEL]	359.805	26.3	9	13	74.68	8.07	4	4	259.83	21.88	8	11	0.96
Q9N306	CELE_Y61A9LA.10	Uncharacterized protein OS=Caenorhabditis elegans GN=CELE_Y61A9LA.10 PE=1 SV=4 - [Q9N306_CAEEL]	145.662	7.3	8	9	34.57	1.8	2	2	114.244	6.16	6	7	0.96
O44326	hmp-2	Beta-catenin-like protein hmp-2 OS=Caenorhabditis elegans GN=hmp-2 PE=1 SV=1 - [HMP2_CAEEL]	59.1881	3.39	3	7	25.36	1.18	1	1	49.6866	4.13	3	5	0.96
H2KYR1	vig-1	VIG (Drosophila Vasa Intronic Gene) ortholog OS=Caenorhabditis elegans GN=vig-1 PE=1 SV=1 - [H2KYR1_CAEEL]	1531.53	41.8	14	38	1576.53	39.42	13	45	2615.09	45.24	20	58	0.95
K8ESK7	CELE_R13H4.2	Uncharacterized protein OS=Caenorhabditis elegans GN=CELE_R13H4.2 PE=1 SV=1 - [K8ESK7_CAEEL]	300.92	46.35	7	10	246.652	34.38	5	9	379.305	41.67	7	13	0.95
P10984	act-2	Actin-2 OS=Caenorhabditis elegans GN=act-2 PE=3 SV=3 - [ACT2_CAEEL]	3914.17	53.19	25	111	2362.85	61.17	26	80	4653.94	64.63	29	127	0.94
Q23312	rps-7	40S ribosomal protein S7 OS=Caenorhabditis elegans GN=rps-7 PE=3 SV=1 - [RS7_CAEEL]	1322.65	62.89	16	49	1430.03	68.04	18	52	2010.44	71.13	20	69	0.94
P52015	cyn-7	Peptidyl-prolyl cis-trans isomerase 7 OS=Caenorhabditis elegans GN=cyn-7 PE=1 SV=2 - [CYP7_CAEEL]	338.808	29.24	4	12	237.567	29.24	4	9	331.167	33.33	5	14	0.94
Q22800	nduf-2.2	NADH Ubiquinone oxidoreductase Fe-S protein OS=Caenorhabditis elegans GN=nduf-2.2 PE=1 SV=1 - [Q22800_CAEEL]	148.377	13.5	4	9	198.143	13.5	6	10	298.798	27	9	13	0.94
Q86B36	fars-1	Phenylalanyl Amino-acyl tRNA Synthetase OS=Caenorhabditis elegans GN=fars-1 PE=1 SV=1 - [Q86B36_CAEEL]	51.1308	7.86	4	5	98.7617	16.33	8	8	91.1501	17.34	8	9	0.94
H2KYZ6	frm-4	FERM domain (Protein4.1-ezrin-radixin-moesin) family OS=Caenorhabditis elegans GN=frm-4 PE=1 SV=1 - [H2KYZ6_CAEEL]	93.05	7.72	5	5	81.39	4.09	3	4	80.88	6.14	4	6	0.94
O45244	mog-4	Probable pre-mRNA-splicing factor ATP-dependent RNA helicase mog-4 OS=Caenorhabditis elegans GN=mog-4 PE=1 SV=2 - [DHX16_CAEEL]	77.1833	2.98	3	3	87.3567	2.28	2	3	159.95	3.47	3	4	0.94
P10771	his-24	Histone H1.1 OS=Caenorhabditis elegans GN=his-24 PE=1 SV=4 - [H11_CAEEL]	75.4167	15.87	3	3	71.78	15.87	3	3	83.3632	15.87	3	4	0.94
Q6EZG4	glrx-3	GLutaRedoXin OS=Caenorhabditis elegans GN=glrx-3 PE=1 SV=1 - [Q6EZG4_CAEEL]	114.91	14.04	3	3	125.217	6.73	2	3	162.872	14.04	3	4	0.94
Q20140	F38B2.4	Adenylate kinase isoenzyme 1 OS=Caenorhabditis elegans GN=F38B2.4 PE=2 SV=1 - [KAD1_CAEEL]	118.41	15.71	2	3	125.663	15.71	2	3	115.53	23.81	3	4	0.94
Q9N425	csn-3	COP9 signalosome complex subunit 3 OS=Caenorhabditis elegans GN=csn-3 PE=1 SV=4 - [CSN3_CAEEL]	101.873	3.99	2	3	127.95	3.99	2	3	110.06	6.19	3	4	0.94
I2HA91	CELE_F28C6.8	Uncharacterized protein OS=Caenorhabditis elegans GN=CELE_F28C6.8 PE=1 SV=1 - [I2HA91_CAEEL]	94.74	15.34	2	3	75.86	8.47	1	3	140.35	8.47	1	4	0.94
Q966L5	E01A2.2	Serrate RNA effector molecule homolog OS=Caenorhabditis elegans GN=E01A2.2 PE=3 SV=1 - [SRRT_CAEEL]	53.04	1.4	1	1	64.93	3.51	2	2	86.53	3.79	2	2	0.93
O01864	nrd-1	NRD (Yeast Nuclear pre-mRNA Down-regulation) homolog OS=Caenorhabditis elegans GN=nrd-1 PE=1 SV=2 - [O01864_CAEEL]	45.26	0.91	1	1	79.49	2.23	2	2	88.58	2.94	2	2	0.93
Q9BL48	set-27	SET (Trithorax/polycomb) domain containing OS=Caenorhabditis elegans GN=set-27 PE=1 SV=2 - [Q9BL48_CAEEL]	43.98	2.19	1	1	109.422	4.38	2	2	71.15	4.38	2	2	0.93
G5EEF4	CELE_K09A9.6	Uncharacterized protein OS=Caenorhabditis elegans GN=CELE_K09A9.6 PE=1 SV=1 - [G5EEF4_CAEEL]	36.32	1.26	1	1	58.87	2.75	2	2	55.27	2.75	2	2	0.93
G5EF97	sfa-1	SF1 protein OS=Caenorhabditis elegans GN=sfa-1 PE=1 SV=1 - [G5EF97_CAEEL]	33.85	1.57	1	1	91.12	5.87	2	2	79.84	1.57	1	2	0.93
Q23098	nuo-6	NADH Ubiquinone Oxidoreductase OS=Caenorhabditis elegans GN=nuo-6 PE=1 SV=2 - [Q23098_CAEEL]	45.77	8.72	1	1	89.03	8.72	1	2	145.31	8.72	1	2	0.93
Q21544	CELE_M153.1	Uncharacterized protein OS=Caenorhabditis elegans GN=CELE_M153.1 PE=1 SV=1 - [Q21544_CAEEL]	50.11	4.3	1	1	67.58	10.04	2	2	84.09	5.73	1	2	0.93
Q8IAA6	CELE_Y47G6A.5	Tyrosine-protein kinase OS=Caenorhabditis elegans GN=CELE_Y47G6A.5 PE=1 SV=1 - [Q8IAA6_CAEEL]	51.24	1.39	1	1	38.7089	3.66	2	2	23.57	3.14	2	2	0.93
S6FCW6	pde-4	PhosphoDiEsterase OS=Caenorhabditis elegans GN=pde-4 PE=1 SV=1 - [S6FCW6_CAEEL]	73.06	2.56	1	1	149.33	2.56	1	2	115.68	2.56	1	2	0.93
Q94263	miro-1	Mitochondrial Rho GTPase 1 OS=Caenorhabditis elegans GN=miro-1 PE=3 SV=1 - [MIRO1_CAEEL]	42.17	1.76	1	1	68.31	3.2	2	2	52.73	4.48	2	2	0.93
Q7YZT6	tps-1	Alpha,alpha-trehalose-phosphate synthase [UDP-forming] 1 OS=Caenorhabditis elegans GN=tps-1 PE=2 SV=1 - [TPS1_CAEEL]	167.8	4.88	6	6	190.02	5.18	6	6	219.66	7.96	8	8	0.93
Q5CCJ3	CELE_H06I04.3	Uncharacterized protein OS=Caenorhabditis elegans GN=CELE_H06I04.3 PE=1 SV=1 - [Q5CCJ3_CAEEL]	68.87	5.03	4	6	54.5606	2.79	2	2	110.985	7.4	5	5	0.93
Q6A8K1	act-4	Actin-4 OS=Caenorhabditis elegans GN=act-4 PE=3 SV=1 - [Q6A8K1_CAEEL]	4236.94	63.54	26	122	2565.6	63.54	26	85	4992.07	67.13	29	136	0.93
Q20647	rpl-25.2	60S ribosomal protein L23a 2 OS=Caenorhabditis elegans GN=rpl-25.2 PE=3 SV=1 - [R23A2_CAEEL]	695.29	45.21	10	20	333.127	43.15	7	11	634.716	45.89	10	20	0.93
Q9XXU9	vha-11	V-type proton ATPase subunit C OS=Caenorhabditis elegans GN=vha-11 PE=2 SV=1 - [VATC_CAEEL]	362.91	38.02	15	16	243.65	29.43	10	10	447.557	35.94	13	17	0.93
Q23445	ZK180.4	GTP-binding protein SAR1 OS=Caenorhabditis elegans GN=ZK180.4 PE=3 SV=1 - [SAR1_CAEEL]	271.332	48.7	6	9	315.203	43.01	5	9	557.29	48.7	7	12	0.93
Q93615	F27D4.1	Probable electron transfer flavoprotein subunit alpha, mitochondrial OS=Caenorhabditis elegans GN=F27D4.1 PE=3 SV=2 - [ETFA_CAEEL]	337.191	36.45	8	9	489.444	33.73	7	9	497.06	47.29	10	12	0.93
G5EG51	nrde-2	Nuclear RNAi defective-2 protein OS=Caenorhabditis elegans GN=nrde-2 PE=1 SV=1 - [NRDE2_CAEEL]	156.51	4.09	4	4	26.24	1.1	1	1	138.98	2.99	3	3	0.92
Q09285	akap-1	KH domain-containing protein akap-1 OS=Caenorhabditis elegans GN=akap-1 PE=3 SV=2 - [AKAP1_CAEEL]	93.9345	4.27	3	4	34.38	1.04	1	1	167.493	3.23	2	3	0.92
Q8I4E2	lst-4	Sorting nexin lst-4 OS=Caenorhabditis elegans GN=lst-4 PE=1 SV=1 - [LST4_CAEEL]	82.27	6.36	3	4	29.84	2.12	1	1	56.5149	4.24	2	3	0.92
Q9U2Q9	gsk-3	Glycogen synthase kinase-3 OS=Caenorhabditis elegans GN=gsk-3 PE=1 SV=1 - [GSK3_CAEEL]	112.35	11.6	3	4	38.04	3.59	1	1	63.98	8.56	3	3	0.92
Q17688	C06A6.5	Thioredoxin domain-containing protein C06A6.5 OS=Caenorhabditis elegans GN=C06A6.5 PE=1 SV=2 - [TXNDL_CAEEL]	105.18	12.83	4	4	49.89	2.42	1	1	109.283	9.93	3	3	0.92
Q9N492	pinn-1	ParvulIN of Nematode OS=Caenorhabditis elegans GN=pinn-1 PE=1 SV=2 - [Q9N492_CAEEL]	71.6442	27.33	4	4	43.09	6.21	1	1	43.8561	12.42	2	3	0.92
Q95QM8	gfat-1	Glutamine-Fructose 6-phosphate AminoTransferase homolog OS=Caenorhabditis elegans GN=gfat-1 PE=1 SV=1 - [Q95QM8_CAEEL]	108.14	6.6	4	4	64.48	1.54	1	1	120.877	3.79	2	3	0.92
Q18852	C54G4.7	Uncharacterized protein OS=Caenorhabditis elegans GN=C54G4.7 PE=1 SV=1 - [Q18852_CAEEL]	39.0223	1.85	1	4	0	1.85	1	1	64.4007	4.76	2	3	0.92
Q9U2F2	cpt-1	Carnitine Palmitoyl Transferase OS=Caenorhabditis elegans GN=cpt-1 PE=1 SV=3 - [Q9U2F2_CAEEL]	81.63	5.91	4	4	42.23	1.54	1	1	132.043	6.42	3	3	0.92
P54811	cdc-48.1	Transitional endoplasmic reticulum ATPase homolog 1 OS=Caenorhabditis elegans GN=cdc-48.1 PE=1 SV=1 - [TERA1_CAEEL]	988.286	26.21	19	40	852.323	20.77	13	30	1305.11	35.97	23	46	0.92
Q21481	dhs-28	DeHydrogenases, Short chain OS=Caenorhabditis elegans GN=dhs-28 PE=1 SV=1 - [Q21481_CAEEL]	683.536	47.71	15	19	360.575	19.27	6	8	671.936	39.91	13	17	0.92
Q9N3H3	CELE_Y53G8AL.2	Uncharacterized protein OS=Caenorhabditis elegans GN=CELE_Y53G8AL.2 PE=1 SV=2 - [Q9N3H3_CAEEL]	399.813	30.16	10	16	96.77	13.23	4	5	466.925	27.84	10	13	0.92
Q10453	his-71	Histone H3.3 type 1 OS=Caenorhabditis elegans GN=his-71 PE=1 SV=2 - [H331_CAEEL]	131.214	19.85	4	10	118.795	19.85	4	7	108.56	17.65	4	11	0.92
O45499	rps-26	40S ribosomal protein S26 OS=Caenorhabditis elegans GN=rps-26 PE=3 SV=1 - [RS26_CAEEL]	186.535	39.32	5	7	204.25	20.51	2	8	271.059	47.86	5	10	0.92
I7KSC2	cfim-2	Cleavage Factor IM (CFIm) homolog OS=Caenorhabditis elegans GN=cfim-2 PE=1 SV=1 - [I7KSC2_CAEEL]	83.9626	12.29	4	4	276.57	16.04	4	9	185.126	16.04	4	9	0.92
Q9TZI1	T10B11.2	Ceramide kinase 1 OS=Caenorhabditis elegans GN=T10B11.2 PE=3 SV=1 - [CERK_CAEEL]	98.2467	9.29	5	7	81.16	7.1	4	4	122.37	14.39	7	7	0.92
Q9XTU6	snr-6	Probable small nuclear ribonucleoprotein E OS=Caenorhabditis elegans GN=snr-6 PE=3 SV=1 - [RUXE_CAEEL]	205.12	32.22	3	7	163.49	32.22	3	4	214.836	45.56	4	7	0.92
Q19734	pgp-13	P-GlycoProtein related OS=Caenorhabditis elegans GN=pgp-13 PE=3 SV=2 - [Q19734_CAEEL]	29.4233	0.45	1	4	27.8	0.98	2	5	28.58	0.45	1	6	0.92
Q9N3T5	spg-7	SPG (Spastic paraplegia) OS=Caenorhabditis elegans GN=spg-7 PE=1 SV=2 - [Q9N3T5_CAEEL]	143.33	8.44	5	5	144.863	8.44	6	7	197.785	9.72	6	8	0.91
O17921	tbb-1	TuBulin, Beta OS=Caenorhabditis elegans GN=tbb-1 PE=1 SV=1 - [O17921_CAEEL]	7611.54	53.45	25	217	7304.28	57.91	28	208	10565.7	81.07	33	281	0.91
Q20228	rps-9	40S ribosomal protein S9 OS=Caenorhabditis elegans GN=rps-9 PE=3 SV=1 - [RS9_CAEEL]	562.439	48.68	15	34	434.096	44.44	12	26	742.624	55.56	20	39	0.91
Q10013	snr-3	Probable small nuclear ribonucleoprotein Sm D1 OS=Caenorhabditis elegans GN=snr-3 PE=3 SV=1 - [SMD1_CAEEL]	767.124	52.38	6	20	1539.75	53.17	7	36	1954.46	53.17	8	38	0.91
G5EEZ4	3E324	3E324 OS=Caenorhabditis elegans GN=3E324 PE=1 SV=1 - [G5EEZ4_CAEEL]	586.1	33.94	11	15	363.87	25.85	7	10	781.726	46.48	13	16	0.91
P34455	aco-2	Probable aconitate hydratase, mitochondrial OS=Caenorhabditis elegans GN=aco-2 PE=3 SV=2 - [ACON_CAEEL]	182.916	10.04	7	9	316.105	16.47	10	12	584.977	15.57	9	14	0.91
Q19490	tba-5	TuBulin, Alpha OS=Caenorhabditis elegans GN=tba-5 PE=1 SV=1 - [Q19490_CAEEL]	107.181	12.53	5	6	153.325	14.09	7	9	298.547	20.36	8	10	0.91
Q95002	tax-6	Serine/threonine-protein phosphatase OS=Caenorhabditis elegans GN=tax-6 PE=1 SV=1 - [Q95002_CAEEL]	122.283	11.03	6	6	120.187	14.39	7	9	160.595	15.14	6	10	0.91
Q09530	mog-5	Probable pre-mRNA-splicing factor ATP-dependent RNA helicase mog-5 OS=Caenorhabditis elegans GN=mog-5 PE=1 SV=1 - [MOG5_CAEEL]	107.161	4.17	4	5	74.6967	1.75	3	3	151.512	5	5	5	0.91
Q8MXH7	C11D2.7	Uncharacterized protein OS=Caenorhabditis elegans GN=C11D2.7 PE=1 SV=1 - [Q8MXH7_CAEEL]	50.35	14.59	2	2	90.05	22.7	3	4	171.976	22.7	3	4	0.91
O44897	haf-9	HAlF transporter (PGP related) OS=Caenorhabditis elegans GN=haf-9 PE=1 SV=2 - [O44897_CAEEL]	217.361	8.83	5	6	219.759	8.83	5	5	214.91	8.83	5	7	0.9
P52275	tbb-2	Tubulin beta-2 chain OS=Caenorhabditis elegans GN=tbb-2 PE=3 SV=1 - [TBB2_CAEEL]	7855.53	53.33	25	224	7495.61	57.78	28	216	10649.3	80.89	33	285	0.9
P34369	prp-8	Pre-mRNA-splicing factor 8 homolog OS=Caenorhabditis elegans GN=prp-8 PE=1 SV=1 - [PRP8_CAEEL]	886.271	15.37	36	52	220.655	5.67	16	21	660.104	11.72	29	45	0.9
Q22620	pars-1	Prolyl Amino-acyl tRNA Synthetase OS=Caenorhabditis elegans GN=pars-1 PE=1 SV=1 - [Q22620_CAEEL]	340.414	23.24	11	16	239.101	15.66	8	11	483.516	19.79	11	17	0.9
Q9XTT9	rpt-6	Proteasome Regulatory Particle, ATPase-like OS=Caenorhabditis elegans GN=rpt-6 PE=1 SV=1 - [Q9XTT9_CAEEL]	532.55	26.68	9	16	237.097	25.48	7	11	554.064	37.26	11	17	0.9
O44145	perm-2	PERMeable eggshell OS=Caenorhabditis elegans GN=perm-2 PE=1 SV=2 - [O44145_CAEEL]	641.383	5.42	1	18	297.855	5.42	1	8	600.798	27.09	5	16	0.9
Q22651	col-164	COLlagen OS=Caenorhabditis elegans GN=col-164 PE=1 SV=1 - [Q22651_CAEEL]	1298.14	15.15	3	20	221.6	15.15	3	5	888.126	15.15	4	15	0.9
Q9XWI6	eif-3.B	Eukaryotic translation initiation factor 3 subunit B OS=Caenorhabditis elegans GN=eif-3.B PE=3 SV=2 - [EIF3B_CAEEL]	286.193	14.76	9	12	192.57	11.45	7	10	368.086	13.93	9	14	0.9
Q20641	nmy-1	Non-muscle MYosin OS=Caenorhabditis elegans GN=nmy-1 PE=1 SV=2 - [Q20641_CAEEL]	343.953	6.37	10	11	160.806	4.33	7	8	335.486	6.67	10	12	0.9
Q9XTI0	B0250.5	Probable 3-hydroxyisobutyrate dehydrogenase, mitochondrial OS=Caenorhabditis elegans GN=B0250.5 PE=3 SV=1 - [3HIDH_CAEEL]	146.242	22.74	5	8	169.699	17.06	4	9	180.367	14.38	6	11	0.9
Q21828	R07E5.13	Probable mitochondrial pyruvate carrier 1 OS=Caenorhabditis elegans GN=R07E5.13 PE=3 SV=2 - [MPC1_CAEEL]	50	10.22	1	2					32.25	10.22	1	1	0.9
P15796	hil-2	Histone H1.2 OS=Caenorhabditis elegans GN=hil-2 PE=1 SV=3 - [H12_CAEEL]	30.44	9.95	2	2					37.6	10.47	1	1	0.9
Q21691	nrde-3	Nuclear RNAi defective-3 protein OS=Caenorhabditis elegans GN=nrde-3 PE=1 SV=1 - [NRDE3_CAEEL]	59.27	1.8	2	2					31.78	0.76	1	1	0.9
Q9NAD6	sta-1	Signal transducer and activator of transcription 1 OS=Caenorhabditis elegans GN=sta-1 PE=1 SV=2 - [STAT1_CAEEL]	39.0856	1.13	1	2					0	0.85	1	1	0.9
Q23400	ZK1127.5	Probable RNA 3'-terminal phosphate cyclase-like protein OS=Caenorhabditis elegans GN=ZK1127.5 PE=3 SV=2 - [RCL1_CAEEL]	75.26	8.71	2	2					38.91	2.11	1	1	0.9
Q3Y409	lmd-3	LysM Domain (Peptidoglycan binding) protein OS=Caenorhabditis elegans GN=lmd-3 PE=1 SV=2 - [Q3Y409_CAEEL]	47.05	2.41	2	2					28.48	0.96	1	1	0.9
Q2V0X4	cogc-3	COGC-3 OS=Caenorhabditis elegans GN=cogc-3 PE=4 SV=1 - [Q2V0X4_CAEEL]	34.73	2.02	2	2					22.19	0.88	1	1	0.9
P41956	mev-1	Succinate dehydrogenase cytochrome b560 subunit, mitochondrial OS=Caenorhabditis elegans GN=mev-1 PE=2 SV=1 - [C560_CAEEL]	35.88	8.79	2	2					26.74	4.4	1	1	0.9
O45783	CELE_T12D8.5	Uncharacterized protein OS=Caenorhabditis elegans GN=CELE_T12D8.5 PE=1 SV=2 - [O45783_CAEEL]	46.99	14.81	2	2					30.93	13.33	1	1	0.9
P34611	ncl-1	B-box type zinc finger protein ncl-1 OS=Caenorhabditis elegans GN=ncl-1 PE=2 SV=1 - [NCL1_CAEEL]	38.22	2.35	2	2					40.87	1.18	1	1	0.9
Q18258	vps-22	Related to yeast Vacuolar Protein Sorting factor OS=Caenorhabditis elegans GN=vps-22 PE=1 SV=2 - [Q18258_CAEEL]	61.95	9.67	2	2					23.23	5.95	1	1	0.9
O61845	chd-7	Chromodomain and Helicase Domain protein OS=Caenorhabditis elegans GN=chd-7 PE=1 SV=3 - [O61845_CAEEL]	34.7431	0.54	2	2		0			36.59	0.24	1	1	0.9
G5EBN9	snf-3	Sodium- and chloride-dependent betaine transporter OS=Caenorhabditis elegans GN=snf-3 PE=1 SV=1 - [SNF3_CAEEL]	47.83	4.83	2	2					28.93	1.33	1	1	0.9
P42000	B0280.9	U3 small nucleolar RNA-associated protein 18 homolog OS=Caenorhabditis elegans GN=B0280.9 PE=3 SV=1 - [UTP18_CAEEL]	70.06	7.23	2	2					65	3.03	1	1	0.9
Q95XJ1	CELE_Y69A2AR.21	Uncharacterized protein OS=Caenorhabditis elegans GN=CELE_Y69A2AR.21 PE=1 SV=1 - [Q95XJ1_CAEEL]	96.18	19.53	2	2					77.43	7.69	1	1	0.9
O62325	rbm-28	RNA Binding Motif protein homolog OS=Caenorhabditis elegans GN=rbm-28 PE=1 SV=2 - [O62325_CAEEL]	47.142	1.15	1	2					48.31	1.15	1	1	0.9
Q9N5X5	C39B5.6	Uncharacterized protein OS=Caenorhabditis elegans GN=C39B5.6 PE=1 SV=3 - [Q9N5X5_CAEEL]	24.02	3.75	2	2					35.84	2.37	1	1	0.9
Q9BL64	CELE_Y54H5A.2	Uncharacterized protein OS=Caenorhabditis elegans GN=CELE_Y54H5A.2 PE=1 SV=2 - [Q9BL64_CAEEL]	36.77	5.07	2	2					39.12	2.93	1	1	0.9
Q93244	cysl-1	Cysteine synthase 1 OS=Caenorhabditis elegans GN=cysl-1 PE=1 SV=2 - [CYSK1_CAEEL]	76.94	9.38	2	2					37.37	6.16	1	1	0.9
Q23680	vha-9	Probable V-type proton ATPase subunit F OS=Caenorhabditis elegans GN=vha-9 PE=3 SV=1 - [VATF_CAEEL]	54.61	19.01	2	2					38.96	7.44	1	1	0.9
Q9XUE5	noah-2	NOmpA Homolog (Drosophila nompA: no mechanoreceptor potential A) OS=Caenorhabditis elegans GN=noah-2 PE=1 SV=1 - [Q9XUE5_CAEEL]	58.05	3.37	2	2					28.8	1.62	1	1	0.9
Q19131	npp-5	Nuclear Pore complex Protein OS=Caenorhabditis elegans GN=npp-5 PE=1 SV=1 - [Q19131_CAEEL]	0	1.72	2	2					30.25	0.86	1	1	0.9
Q93571	ubc-25	Ubiquitin-conjugating enzyme E2 25 OS=Caenorhabditis elegans GN=ubc-25 PE=2 SV=2 - [UBC25_CAEEL]	101.97	7.75	2	2					27.27	4.13	1	1	0.9
A6ZJ62	CELE_F35G2.1	Sulfhydryl oxidase OS=Caenorhabditis elegans GN=CELE_F35G2.1 PE=1 SV=1 - [A6ZJ62_CAEEL]	71.24	4.39	2	2		0			42.01	3	1	1	0.9
G5EFZ3	ash-2	ASH histone methyltransferase complex subunit (Drosophila absent, small or homeotic discs) OS=Caenorhabditis elegans GN=ash-2 PE=1 SV=1 - [G5EFZ3_CAEEL]	100	2.46	1	2					21.94	1.4	1	1	0.9
Q8I4H6	CELE_K07A1.9	Arginyl-tRNA--protein transferase 1 OS=Caenorhabditis elegans GN=CELE_K07A1.9 PE=1 SV=1 - [Q8I4H6_CAEEL]	36.68	4.6	2	2					25.69	2.63	1	1	0.9
Q9NAP9	mrps-15	28S ribosomal protein S15, mitochondrial OS=Caenorhabditis elegans GN=mrps-15 PE=3 SV=1 - [RT15_CAEEL]	87.88	6.97	2	2					34.77	2.73	1	1	0.9
O61749	F37F2.2	Probable signal recognition particle 19 kDa protein OS=Caenorhabditis elegans GN=F37F2.2 PE=3 SV=4 - [SRP19_CAEEL]	39.53	7.75	1	2					35.73	7.75	1	1	0.9
H2KYH9	C28G1.5	Uncharacterized protein OS=Caenorhabditis elegans GN=C28G1.5 PE=1 SV=1 - [H2KYH9_CAEEL]	67.46	23.76	2	2					61.5	11.88	1	1	0.9
Q18407	tag-322	Uncharacterized protein OS=Caenorhabditis elegans GN=tag-322 PE=1 SV=2 - [Q18407_CAEEL]	51.17	5.75	2	2					52.66	5.75	1	1	0.9
A9D0C6	CELE_T02H6.1	Uncharacterized protein OS=Caenorhabditis elegans GN=CELE_T02H6.1 PE=1 SV=1 - [A9D0C6_CAEEL]					70.4867	6.56	3	3	33.47	4.44	2	2	0.89
Q22262	CELE_T06E4.8	Uncharacterized protein OS=Caenorhabditis elegans GN=CELE_T06E4.8 PE=1 SV=2 - [Q22262_CAEEL]					53.3533	26.13	2	3	33.45	26.13	2	2	0.89
Q9N4N4	swsn-6	SWI/SNF nucleosome remodeling complex component OS=Caenorhabditis elegans GN=swsn-6 PE=1 SV=2 - [Q9N4N4_CAEEL]	105.22	7.34	3	5	88.5533	11.01	5	6	155.214	10.55	4	7	0.89
O62198	CELE_F32A11.1	Uncharacterized protein OS=Caenorhabditis elegans GN=CELE_F32A11.1 PE=1 SV=1 - [O62198_CAEEL]	176.661	23.2	6	6	30.11	3.13	1	1	119.933	14.42	4	4	0.89
Q9BPN6	mrpl-15	Mitochondrial Ribosomal Protein, Large OS=Caenorhabditis elegans GN=mrpl-15 PE=1 SV=1 - [Q9BPN6_CAEEL]	202.417	16.11	4	6	36.3	3.36	1	1	132.28	14.43	4	4	0.89
G5EFU2	ant-1.4	Adenine Nucleotide Translocator OS=Caenorhabditis elegans GN=ant-1.4 PE=2 SV=1 - [G5EFU2_CAEEL]	1337.47	32.27	10	43	1302.78	28.43	9	40	2248.56	37.7	11	53	0.89
P54812	cdc-48.2	Transitional endoplasmic reticulum ATPase homolog 2 OS=Caenorhabditis elegans GN=cdc-48.2 PE=1 SV=2 - [TERA2_CAEEL]	822.586	20.86	16	33	698.277	23.09	14	27	1067.43	32.72	21	38	0.89
Q9N4Y8	nuo-5	NADH Ubiquinone Oxidoreductase OS=Caenorhabditis elegans GN=nuo-5 PE=1 SV=1 - [Q9N4Y8_CAEEL]	548.31	30.45	19	25	690.371	34.43	19	25	806.248	37.72	21	32	0.89
Q17763	atp-5	ATP synthase subunit OS=Caenorhabditis elegans GN=atp-5 PE=1 SV=2 - [Q17763_CAEEL]	765.037	57.07	12	26	501.163	51.83	10	17	917.254	73.3	14	27	0.89
Q9NAH6	rsks-1	Ribosomal protein S6 kinase beta OS=Caenorhabditis elegans GN=rsks-1 PE=1 SV=2 - [KS6B_CAEEL]	273.59	12.73	5	10	203.093	16	6	9	315.803	19.09	7	12	0.89
Q18846	rskn-2	Putative ribosomal protein S6 kinase alpha-2 OS=Caenorhabditis elegans GN=rskn-2 PE=3 SV=2 - [KS6A2_CAEEL]	154.581	7.12	5	7	158.149	9.97	7	10	168.45	13.08	9	11	0.89
Q9BLB6	mog-2	Probable U2 small nuclear ribonucleoprotein A' OS=Caenorhabditis elegans GN=mog-2 PE=1 SV=1 - [RU2A_CAEEL]	355.308	36.36	8	11	100.473	21.74	4	4	302.315	41.11	9	9	0.89
F5GU60	CELE_T21F4.1	Uncharacterized protein OS=Caenorhabditis elegans GN=CELE_T21F4.1 PE=1 SV=1 - [F5GU60_CAEEL]	194.34	15.2	4	6	179.435	17.63	5	8	198.878	19.45	6	9	0.89
O44566	CELE_W03F8.4	Uncharacterized protein OS=Caenorhabditis elegans GN=CELE_W03F8.4 PE=1 SV=1 - [O44566_CAEEL]	220.21	27.87	3	6	292.745	34.97	5	8	324.907	31.69	5	9	0.89
P52009	cyn-1	Peptidyl-prolyl cis-trans isomerase 1 OS=Caenorhabditis elegans GN=cyn-1 PE=2 SV=1 - [CYP1_CAEEL]	230.762	7.29	1	8	138.148	7.29	1	5	200.158	18.23	3	8	0.89
G5EDE8	ile-1	ERGIC-53-like protein OS=Caenorhabditis elegans GN=ile-1 PE=1 SV=1 - [G5EDE8_CAEEL]	188.473	11.18	4	7	44.65	7.11	3	3	218.96	10.98	4	6	0.89
Q9XWK0	CELE_Y54E5A.2	Uncharacterized protein OS=Caenorhabditis elegans GN=CELE_Y54E5A.2 PE=4 SV=2 - [Q9XWK0_CAEEL]	42.2013	1.18	1	4	45.2884	1.18	1	4	47.6433	1.18	1	5	0.89
O18239	sec-61	Yeast SEC homolog OS=Caenorhabditis elegans GN=sec-61 PE=1 SV=1 - [O18239_CAEEL]	93.75	4.44	3	4	83.09	6.77	3	4	116.263	8.67	3	5	0.89
Q19824	cee-1	Conserved Edge Expressed protein OS=Caenorhabditis elegans GN=cee-1 PE=1 SV=1 - [Q19824_CAEEL]	123.607	11.88	4	4	97.46	15.19	4	4	135.74	15.75	5	5	0.89
Q9N359	csn-4	COP9 signalosome complex subunit 4 OS=Caenorhabditis elegans GN=csn-4 PE=1 SV=1 - [CSN4_CAEEL]	63.9433	7.28	3	3	38.11	5.1	2	2	100.106	9.47	3	3	0.89
Q9N363	dcap-1	mRNA DeCAPping enzyme OS=Caenorhabditis elegans GN=dcap-1 PE=1 SV=1 - [Q9N363_CAEEL]	58.3195	11.45	3	3	68.46	9.04	2	2	54.1628	11.45	3	3	0.89
Q95YF1	C07H6.4	Uncharacterized protein OS=Caenorhabditis elegans GN=C07H6.4 PE=1 SV=1 - [Q95YF1_CAEEL]	65.63	2.36	2	3	80.54	2.36	2	2	82.2167	3.97	3	3	0.89
Q10664	mek-2	Dual specificity mitogen-activated protein kinase kinase mek-2 OS=Caenorhabditis elegans GN=mek-2 PE=1 SV=1 - [MEK2_CAEEL]	78.14	5.94	3	3	50.41	4.65	2	2	93.4938	5.94	3	3	0.89
Q9TZL9	fard-1	Fatty Acyl-CoA ReDuctase OS=Caenorhabditis elegans GN=fard-1 PE=1 SV=1 - [Q9TZL9_CAEEL]	55.7867	5.97	3	3	27.88	3.54	2	2	44.6333	5.78	3	3	0.89
Q23402	ZK1127.4	Protein BCCIP homolog OS=Caenorhabditis elegans GN=ZK1127.4 PE=3 SV=1 - [BCCIP_CAEEL]	85.24	8.31	3	3	42.34	6.88	2	2	73.3366	8.31	2	3	0.89
Q9U3C1	npp-1	Nuclear Pore complex Protein OS=Caenorhabditis elegans GN=npp-1 PE=1 SV=1 - [Q9U3C1_CAEEL]	85.0667	5.83	3	3	58.19	4.37	2	2	61.79	5.83	3	3	0.89
Q65ZI3	dhs-30	DeHydrogenases, Short chain OS=Caenorhabditis elegans GN=dhs-30 PE=1 SV=1 - [Q65ZI3_CAEEL]	114.867	11.9	3	3	82.88	7.72	2	2	79.2267	8.04	2	3	0.89
P02566	unc-54	Myosin-4 OS=Caenorhabditis elegans GN=unc-54 PE=1 SV=2 - [MYO4_CAEEL]	10124.9	33.21	66	343	7071.15	31.53	63	240	12227.3	43.81	84	365	0.88
Q18688	daf-21	Heat shock protein 90 OS=Caenorhabditis elegans GN=daf-21 PE=1 SV=1 - [HSP90_CAEEL]	2750.1	41.45	29	87	1962.45	39.03	24	67	3398.8	45.3	34	97	0.88
P49405	rpl-5	60S ribosomal protein L5 OS=Caenorhabditis elegans GN=rpl-5 PE=3 SV=1 - [RL5_CAEEL]	1316.88	60.07	16	33	1067.54	57.34	16	30	1899.36	57.68	17	40	0.88
Q9U1Q4	vrs-2	Valine--tRNA ligase OS=Caenorhabditis elegans GN=vrs-2 PE=1 SV=1 - [SYV_CAEEL]	727.741	22.19	20	30	452.983	17.24	14	17	762.994	26.95	22	29	0.88
O01692	rps-17	40S ribosomal protein S17 OS=Caenorhabditis elegans GN=rps-17 PE=3 SV=2 - [RS17_CAEEL]	699.506	46.15	9	23	414.91	43.85	4	13	704.6	56.92	9	22	0.88
H2L0S8	CELE_Y119D3B.12	Uncharacterized protein OS=Caenorhabditis elegans GN=CELE_Y119D3B.12 PE=1 SV=1 - [H2L0S8_CAEEL]	733.083	27.73	9	21	487.784	26.55	7	13	876.943	28.61	11	21	0.88
Q19371	sec-24.1	Yeast SEC homolog OS=Caenorhabditis elegans GN=sec-24.1 PE=1 SV=1 - [Q19371_CAEEL]	275.351	10.39	11	15	185.855	6.31	7	8	266.417	11.28	10	14	0.88
P52713	alh-8	Probable methylmalonate-semialdehyde dehydrogenase [acylating], mitochondrial OS=Caenorhabditis elegans GN=alh-8 PE=3 SV=1 - [MMSA_CAEEL]	207.169	15.87	7	11	165.333	13.38	6	7	263.883	17.21	7	11	0.88
O17570	rpl-38	60S ribosomal protein L38 OS=Caenorhabditis elegans GN=rpl-38 PE=3 SV=2 - [RL38_CAEEL]	169.76	28.57	3	10	81.14	51.43	3	5	206.907	51.43	4	9	0.88
P34519	K11H3.3	Putative tricarboxylate transport protein, mitochondrial OS=Caenorhabditis elegans GN=K11H3.3 PE=3 SV=1 - [TXTP_CAEEL]	118.49	17.95	6	7	129.861	14.42	5	6	250.01	23.08	5	8	0.88
A3QMC5	rpl-34	Ribosomal Protein, Large subunit OS=Caenorhabditis elegans GN=rpl-34 PE=1 SV=1 - [A3QMC5_CAEEL]	124.05	20.91	5	7	134.95	38.18	5	6	148.912	38.18	6	8	0.88
O45380	tps-2	Alpha,alpha-trehalose-phosphate synthase [UDP-forming] 2 OS=Caenorhabditis elegans GN=tps-2 PE=2 SV=3 - [TPS2_CAEEL]	99.16	3.58	5	6	24.16	2.12	3	4	107.293	4.07	5	6	0.87
Q95ZQ4	aak-2	5'-AMP-activated protein kinase catalytic subunit alpha-2 OS=Caenorhabditis elegans GN=aak-2 PE=1 SV=2 - [AAPK2_CAEEL]	182.89	9.9	5	6	165.36	7.19	3	4	222.513	13.1	6	6	0.87
Q9Y194	spl-1	Sphingosine-1-phosphate lyase OS=Caenorhabditis elegans GN=spl-1 PE=1 SV=1 - [SGPL_CAEEL]	114.847	7.07	4	6	74.04	8.15	4	4	116.893	8.51	4	6	0.87
P53013	eft-3	Elongation factor 1-alpha OS=Caenorhabditis elegans GN=eft-3 PE=3 SV=1 - [EF1A_CAEEL]	3581.53	58.96	24	122	4347.83	58.96	23	138	5751.68	69.33	29	165	0.87
Q8MXD9	CELE_E02D9.1	Uncharacterized protein OS=Caenorhabditis elegans GN=CELE_E02D9.1 PE=1 SV=1 - [Q8MXD9_CAEEL]	1122.31	37.14	11	40	1195.58	37.14	11	37	1400.35	44.13	15	48	0.87
Q09508	sdha-1	Succinate dehydrogenase [ubiquinone] flavoprotein subunit, mitochondrial OS=Caenorhabditis elegans GN=sdha-1 PE=2 SV=3 - [SDHA_CAEEL]	1033.26	31.11	17	37	897.281	31.27	17	29	1314.4	33.28	18	41	0.87
Q9N3F7	CELE_Y53G8AR.9	Uncharacterized protein OS=Caenorhabditis elegans GN=CELE_Y53G8AR.9 PE=1 SV=1 - [Q9N3F7_CAEEL]	523.124	41.59	12	28	482.193	42.22	12	25	758.74	54.92	15	33	0.87
Q93873	gas-1	Probable NADH dehydrogenase [ubiquinone] iron-sulfur protein 2, mitochondrial OS=Caenorhabditis elegans GN=gas-1 PE=3 SV=2 - [NDUS2_CAEEL]	383.594	23.03	9	20	477.026	18.26	8	20	713.311	41.08	15	25	0.87
Q9U2D9	gsy-1	Glycogen [starch] synthase OS=Caenorhabditis elegans GN=gsy-1 PE=1 SV=1 - [GYS_CAEEL]	426.053	18.15	12	22	323.881	15.18	12	17	568.33	23.07	15	24	0.87
Q8IG31	prdx-2	PeRoxireDoXin OS=Caenorhabditis elegans GN=prdx-2 PE=1 SV=1 - [Q8IG31_CAEEL]	437.196	51.28	8	19	632.16	64.1	9	18	684.278	73.85	10	23	0.87
P41988	cct-1	T-complex protein 1 subunit alpha OS=Caenorhabditis elegans GN=cct-1 PE=3 SV=2 - [TCPA_CAEEL]	409.084	24.95	12	19	346.047	19.67	11	15	558.82	27.32	15	21	0.87
Q18115	rpn-2	26S proteasome non-ATPase regulatory subunit 1 OS=Caenorhabditis elegans GN=rpn-2 PE=3 SV=4 - [PSMD1_CAEEL]	341.797	13.68	13	18	264.529	13.68	13	16	391.803	18.24	16	21	0.87
Q19877	rps-23	40S ribosomal protein S23 OS=Caenorhabditis elegans GN=rps-23 PE=3 SV=1 - [RS23_CAEEL]	565.051	33.57	5	18	521.355	44.76	6	16	944.129	53.15	7	21	0.87
P50093	phb-2	Mitochondrial prohibitin complex protein 2 OS=Caenorhabditis elegans GN=phb-2 PE=1 SV=2 - [PHB2_CAEEL]	477.491	37.41	12	21	287.963	29.59	7	12	617.479	47.96	13	20	0.87
Q95YD8	idhg-2	Isocitrate dehydrogenase [NAD] subunit, mitochondrial OS=Caenorhabditis elegans GN=idhg-2 PE=1 SV=1 - [Q95YD8_CAEEL]	367.559	28.15	8	15	261.853	21.72	6	11	706.483	32.17	8	16	0.87
Q22508	tag-18	Uncharacterized protein OS=Caenorhabditis elegans GN=tag-18 PE=1 SV=1 - [Q22508_CAEEL]	238.993	39.8	11	14	194.195	25.87	7	9	300.104	39.8	9	14	0.87
Q9BL83	vps-4	Related to yeast Vacuolar Protein Sorting factor OS=Caenorhabditis elegans GN=vps-4 PE=1 SV=4 - [Q9BL83_CAEEL]	190.93	23.26	8	10	144.11	12.79	5	8	293.89	20.47	8	11	0.87
O16520	erfa-1	Eukaryotic peptide chain release factor subunit 1 OS=Caenorhabditis elegans GN=erfa-1 PE=3 SV=2 - [ERF1_CAEEL]	188.102	9.3	6	9	125.76	3.58	2	6	200.949	15.92	7	9	0.87
Q23381	mmcm-1	Probable methylmalonyl-CoA mutase, mitochondrial OS=Caenorhabditis elegans GN=mmcm-1 PE=3 SV=2 - [MUTA_CAEEL]	203.753	8.87	5	9	190.387	8.06	4	6	300.265	12.23	7	9	0.87
Q95XT5	trap-1	TRanslocon-Associated Protein OS=Caenorhabditis elegans GN=trap-1 PE=1 SV=1 - [Q95XT5_CAEEL]	198.87	22.57	3	3	174.17	28.79	5	5	261.86	25.68	4	5	0.87
Q9GRZ2	prp-6	Yeast PRP (Splicing factor) related OS=Caenorhabditis elegans GN=prp-6 PE=1 SV=3 - [Q9GRZ2_CAEEL]	55.7767	2.69	3	3	116.05	4.86	5	5	167.93	5.58	5	5	0.87
Q9BI73	CELE_R151.2	Uncharacterized protein OS=Caenorhabditis elegans GN=CELE_R151.2 PE=1 SV=3 - [Q9BI73_CAEEL]	84.7667	7.21	2	3	82.04	12.85	4	5	116.41	12.54	4	5	0.87
Q21624	cor-1	Coronin-like protein cor-1 OS=Caenorhabditis elegans GN=cor-1 PE=3 SV=2 - [CORO_CAEEL]	92.0327	7.25	4	5	27.46	2.97	2	2	94.2	5.44	4	4	0.87
Q9XW16	pfn-1	Profilin-1 OS=Caenorhabditis elegans GN=pfn-1 PE=2 SV=1 - [PROF1_CAEEL]	127.818	34.09	4	5	77.05	18.18	2	2	113.92	44.7	4	4	0.87
P41932	par-5	14-3-3-like protein 1 OS=Caenorhabditis elegans GN=par-5 PE=1 SV=2 - [14331_CAEEL]	152.733	18.95	5	6	142.404	27.02	7	7	245.727	29.44	7	8	0.86
Q19749	F23B12.5	Dihydrolipoyllysine-residue acetyltransferase component of pyruvate dehydrogenase complex, mitochondrial OS=Caenorhabditis elegans GN=F23B12.5 PE=1 SV=1 - [ODP2_CAEEL]	544.821	26.04	9	17	911.721	21.89	9	27	1138.89	26.23	10	28	0.86
Q18947	CELE_D1054.11	Uncharacterized protein OS=Caenorhabditis elegans GN=CELE_D1054.11 PE=1 SV=1 - [Q18947_CAEEL]	1250.61	26.81	6	38	189.04	14.2	3	6	892.577	35.33	8	25	0.86
Q9BKU4	phb-1	Mitochondrial prohibitin complex protein 1 OS=Caenorhabditis elegans GN=phb-1 PE=1 SV=1 - [PHB1_CAEEL]	511.914	32.73	8	14	682.457	51.27	11	18	789.2	61.45	12	20	0.86
P48162	rpl-25.1	60S ribosomal protein L23a 1 OS=Caenorhabditis elegans GN=rpl-25.1 PE=3 SV=1 - [R23A1_CAEEL]	582.702	48.98	8	23	320.653	48.3	7	11	501.767	52.38	11	20	0.86
Q9GZH5	rpn-1	Proteasome Regulatory Particle, Non-ATPase-like OS=Caenorhabditis elegans GN=rpn-1 PE=1 SV=1 - [Q9GZH5_CAEEL]	358.128	13.66	12	17	363.058	14.07	12	14	435.761	17.23	14	19	0.86
P34308	clp-1	Calpain clp-1 OS=Caenorhabditis elegans GN=clp-1 PE=3 SV=4 - [CAN_CAEEL]	229.413	14.49	10	12	192.845	11.15	8	11	309.403	20.26	11	14	0.86
O17607	ruvb-1	RuvB-like 1 OS=Caenorhabditis elegans GN=ruvb-1 PE=1 SV=2 - [RUVB1_CAEEL]	168.12	8.82	4	5	279.18	24.16	9	12	386.951	17.02	6	11	0.86
I7FXD3	rab-5	Rab-5 (Fragment) OS=Caenorhabditis elegans GN=rab-5 PE=2 SV=1 - [I7FXD3_CAEEL]	287.025	34.3	4	8	106.37	28.5	4	4	232.517	34.3	4	7	0.86
G5EE96	CELE_K11G12.5	Oxoglutarate/malate carrier protein OS=Caenorhabditis elegans GN=CELE_K11G12.5 PE=1 SV=1 - [G5EE96_CAEEL]	41.3133	13.79	5	5	56.18	13.45	5	5	73.3404	17.93	6	6	0.86
Q9XX15	Y39A1A.14	Ribosomal RNA small subunit methyltransferase nep-1 OS=Caenorhabditis elegans GN=Y39A1A.14 PE=3 SV=1 - [NEP1_CAEEL]	30.2	13.42	2	2	71.3167	8.23	1	3	120.3	16.02	2	3	0.86
Q18100	sax-7	Sensory AXon guidance OS=Caenorhabditis elegans GN=sax-7 PE=1 SV=3 - [Q18100_CAEEL]	47.07	1.57	2	2	75.1722	2.36	3	3	97.4233	2.36	3	3	0.86
I7F493	rab-8	Rab-8 (Fragment) OS=Caenorhabditis elegans GN=rab-8 PE=2 SV=1 - [I7F493_CAEEL]	86.68	11.9	2	2	111.123	17.14	3	3	113.077	17.14	3	3	0.86
O02161	tin-44	Probable mitochondrial import inner membrane translocase subunit tin-44 OS=Caenorhabditis elegans GN=tin-44 PE=3 SV=1 - [TIM44_CAEEL]	37.99	5.65	2	2	102.69	7.29	2	3	112.85	8.47	3	3	0.86
Q9XW68	CELE_Y75B8A.14	Uncharacterized protein OS=Caenorhabditis elegans GN=CELE_Y75B8A.14 PE=1 SV=1 - [Q9XW68_CAEEL]	114.22	9.56	2	2	108.594	11.76	3	3	131.85	13.97	3	3	0.86
G5EES9	txl-1	ThioredoXin-Like OS=Caenorhabditis elegans GN=txl-1 PE=1 SV=1 - [G5EES9_CAEEL]	100.01	14.79	2	2	101.297	23.59	3	3	89.9233	23.59	3	3	0.86
P41942	B0272.4	Uncharacterized protein B0272.4 OS=Caenorhabditis elegans GN=B0272.4 PE=3 SV=1 - [YKB4_CAEEL]	111.136	18.04	4	4					31.6	8.24	2	2	0.86
Q09509	F25B5.6	Putative folylpolyglutamate synthase OS=Caenorhabditis elegans GN=F25B5.6 PE=3 SV=1 - [FOLC_CAEEL]	72.54	10	4	4					77.84	8.43	2	2	0.86
O16997	CELE_W03F9.10	Uncharacterized protein OS=Caenorhabditis elegans GN=CELE_W03F9.10 PE=1 SV=1 - [O16997_CAEEL]	64.97	4.65	3	4					24.8	4.98	2	2	0.86
Q9N3G1	CELE_Y53G8AR.8	Uncharacterized protein OS=Caenorhabditis elegans GN=CELE_Y53G8AR.8 PE=1 SV=3 - [Q9N3G1_CAEEL]	79.1822	7.03	3	4		0			62.0158	6.15	2	2	0.86
O62178	rme-8	Receptor Mediated Endocytosis OS=Caenorhabditis elegans GN=rme-8 PE=1 SV=3 - [O62178_CAEEL]	63.12	1.45	3	4					44.51	0.92	2	2	0.86
Q22824	cgr-1	CRAL/TRIO and GOLD domain suppressor of activated Ras OS=Caenorhabditis elegans GN=cgr-1 PE=1 SV=3 - [Q22824_CAEEL]	72.98	10.18	3	4					34.62	1.83	1	2	0.86
Q8I4H8	ldb-1	LIM Domain Binding protein OS=Caenorhabditis elegans GN=ldb-1 PE=1 SV=1 - [Q8I4H8_CAEEL]	52.08	4.67	2	2	188.38	10.55	5	6	99.54	11.25	5	5	0.85
O02056	rpl-4	60S ribosomal protein L4 OS=Caenorhabditis elegans GN=rpl-4 PE=1 SV=3 - [RL4_CAEEL]	4407.28	62.9	31	119	3726.77	59.71	29	107	5425.04	64.35	34	138	0.85
Q9XW92	vha-13	V-type proton ATPase catalytic subunit A OS=Caenorhabditis elegans GN=vha-13 PE=1 SV=3 - [VATA_CAEEL]	1185.09	34.32	18	47	992.699	39.44	20	46	1411.11	47.36	28	57	0.85
P48152	rps-3	40S ribosomal protein S3 OS=Caenorhabditis elegans GN=rps-3 PE=3 SV=1 - [RS3_CAEEL]	1111.34	74.49	22	45	1229.57	74.49	22	45	1712.69	75.71	24	55	0.85
P48156	rps-8	40S ribosomal protein S8 OS=Caenorhabditis elegans GN=rps-8 PE=3 SV=1 - [RS8_CAEEL]	1842.4	67.31	18	45	1780.51	66.83	17	43	2365.46	68.27	19	54	0.85
Q9XVF7	rpl-8	60S ribosomal protein L8 OS=Caenorhabditis elegans GN=rpl-8 PE=3 SV=1 - [RL8_CAEEL]	964.26	50.38	13	37	679.545	35.38	11	28	1224.92	66.54	16	39	0.85
O02328	eif-3.C	Eukaryotic translation initiation factor 3 subunit C OS=Caenorhabditis elegans GN=eif-3.C PE=3 SV=2 - [EIF3C_CAEEL]	854.741	19.6	19	39	307.955	12.47	13	16	877.158	22.16	20	32	0.85
O02141	C46G7.2	Uncharacterized protein OS=Caenorhabditis elegans GN=C46G7.2 PE=1 SV=1 - [O02141_CAEEL]	520.934	62	13	23	302.466	60.8	11	14	516.848	64.4	13	22	0.85
Q17967	pdi-1	Protein disulfide-isomerase 1 OS=Caenorhabditis elegans GN=pdi-1 PE=3 SV=1 - [PDI1_CAEEL]	370.11	27.22	11	15	399.577	32.37	12	16	574.375	37.73	13	19	0.85
Q9N4F3	apb-1	AP complex subunit beta OS=Caenorhabditis elegans GN=apb-1 PE=1 SV=2 - [Q9N4F3_CAEEL]	420.479	17.38	15	19	324.701	11.41	10	13	529.98	12.98	13	19	0.85
P46550	cct-6	T-complex protein 1 subunit zeta OS=Caenorhabditis elegans GN=cct-6 PE=1 SV=1 - [TCPZ_CAEEL]	253.627	24.86	12	14	230.357	23.56	10	11	473.442	25.79	12	15	0.85
Q65ZK0	rars-1	Arginyl(R) Amino-acyl tRNA Synthetase OS=Caenorhabditis elegans GN=rars-1 PE=1 SV=1 - [Q65ZK0_CAEEL]	372.804	11.85	8	14	267.93	16.18	10	11	465.447	22.69	15	15	0.85
Q22038	rho-1	Ras-like GTP-binding protein rhoA OS=Caenorhabditis elegans GN=rho-1 PE=1 SV=1 - [RHO1_CAEEL]	217.574	26.04	4	6	579.053	43.23	5	13	471.337	53.65	7	12	0.85
P91913	rla-1	60S acidic ribosomal protein P1 OS=Caenorhabditis elegans GN=rla-1 PE=3 SV=2 - [RLA1_CAEEL]	404.42	62.16	3	10	240.726	53.15	3	7	396.34	53.15	4	10	0.85
Q9U1R7	arx-3	ARp2/3 compleX component OS=Caenorhabditis elegans GN=arx-3 PE=1 SV=1 - [Q9U1R7_CAEEL]	191.907	19.29	5	6	329.07	26.63	7	10	400.93	36.68	9	10	0.85
H2L023	cas-1	Adenylyl cyclase-associated protein OS=Caenorhabditis elegans GN=cas-1 PE=1 SV=1 - [H2L023_CAEEL]	203.25	8.28	2	5	269.48	15.96	5	8	239.65	24.85	7	8	0.85
Q95008	pas-5	Proteasome subunit alpha type-5 OS=Caenorhabditis elegans GN=pas-5 PE=1 SV=1 - [PSA5_CAEEL]	131.004	35.48	6	7	125.97	23.79	5	5	184.829	35.48	7	7	0.85
O17680	sams-1	Probable S-adenosylmethionine synthase 1 OS=Caenorhabditis elegans GN=sams-1 PE=1 SV=1 - [METK1_CAEEL]	195.834	15.63	6	7	142.53	14.64	5	5	260.884	19.6	6	7	0.85
Q19264	F09E5.3	Putative deoxyribose-phosphate aldolase OS=Caenorhabditis elegans GN=F09E5.3 PE=3 SV=1 - [DEOC_CAEEL]	246.447	31.35	7	7	68.91	7.59	2	2	171.07	19.14	4	5	0.85
Q22352	CELE_T08H10.1	Uncharacterized protein OS=Caenorhabditis elegans GN=CELE_T08H10.1 PE=1 SV=2 - [Q22352_CAEEL]	141.457	24.32	6	7	37.98	7.51	2	2	117.15	10.51	3	5	0.85
Q03755	cut-1	Cuticlin-1 OS=Caenorhabditis elegans GN=cut-1 PE=2 SV=2 - [CUT1_CAEEL]	139.687	19.1	3	7	35.82	2.36	1	2	158.616	8.25	2	5	0.85
O45227	B0513.4	Uncharacterized protein OS=Caenorhabditis elegans GN=B0513.4 PE=1 SV=1 - [O45227_CAEEL]	87.44	16.67	2	6					73.4167	27.5	3	3	0.84
Q9XXK1	H28O16.1	ATP synthase subunit alpha, mitochondrial OS=Caenorhabditis elegans GN=H28O16.1 PE=1 SV=1 - [ATPA_CAEEL]	3644.87	61.15	36	131	4225.58	63.38	38	147	5287.13	62.64	40	170	0.84
Q9NLD1	hrp-2	HnRNP A1 homolog OS=Caenorhabditis elegans GN=hrp-2 PE=1 SV=2 - [Q9NLD1_CAEEL]	1375.89	37.15	25	80	2212.21	45.34	30	102	2942.58	44.35	32	112	0.84
Q19286	ifb-2	Intermediate filament protein ifb-2 OS=Caenorhabditis elegans GN=ifb-2 PE=1 SV=1 - [IFB2_CAEEL]	2168.21	62.25	36	83	2082.33	60.96	35	76	2718.18	78.45	46	96	0.84
P19626	mlc-2	Myosin regulatory light chain 2 OS=Caenorhabditis elegans GN=mlc-2 PE=3 SV=1 - [MLR2_CAEEL]	1789.99	71.76	16	57	2652.37	76.47	18	70	3301.03	77.06	20	78	0.84
P47991	rpl-6	60S ribosomal protein L6 OS=Caenorhabditis elegans GN=rpl-6 PE=1 SV=1 - [RL6_CAEEL]	2247.18	54.84	17	65	1379.65	58.53	15	39	1953.92	54.84	17	61	0.84
Q22494	vha-15	Probable V-type proton ATPase subunit H 2 OS=Caenorhabditis elegans GN=vha-15 PE=3 SV=1 - [VATH2_CAEEL]	1203.85	42.55	19	38	1033.74	43.4	19	35	1310.72	56.38	22	44	0.84
Q965K2	CELE_F53H1.1	Uncharacterized protein OS=Caenorhabditis elegans GN=CELE_F53H1.1 PE=1 SV=1 - [Q965K2_CAEEL]	572.07	15.36	14	26	637.645	18.14	17	31	793.563	22.16	19	35	0.84
O18240	rps-18	Ribosomal Protein, Small subunit OS=Caenorhabditis elegans GN=rps-18 PE=1 SV=1 - [O18240_CAEEL]	690.572	45.45	8	23	395.521	45.45	8	16	1017.94	46.1	10	23	0.84
G5EGL2	CELE_T28D6.6	Uncharacterized protein OS=Caenorhabditis elegans GN=CELE_T28D6.6 PE=1 SV=1 - [G5EGL2_CAEEL]	378.084	21.04	5	9	182.23	12.02	3	5	306.557	25.68	6	8	0.84
P34580	T26G10.1	Putative ATP-dependent RNA helicase T26G10.1 OS=Caenorhabditis elegans GN=T26G10.1 PE=3 SV=1 - [DDX47_CAEEL]	29.77	2.25	1	1	34	2.45	1	1	22.82	2.25	1	1	0.84
Q03604	rnr-1	Ribonucleoside-diphosphate reductase large subunit OS=Caenorhabditis elegans GN=rnr-1 PE=3 SV=1 - [RIR1_CAEEL]	40.39	1.65	1	1	46.78	1.65	1	1	53.29	1.65	1	1	0.84
O17528	sel-9	Suppressor/enhancer of lin-12 protein 9 OS=Caenorhabditis elegans GN=sel-9 PE=1 SV=1 - [TMED2_CAEEL]	27.57	4.93	1	1	26.37	4.93	1	1	22.86	4.93	1	1	0.84
P34385	F02A9.4	Probable methylcrotonoyl-CoA carboxylase beta chain, mitochondrial OS=Caenorhabditis elegans GN=F02A9.4 PE=3 SV=1 - [MCCB_CAEEL]	29.5	1.48	1	1	28.23	2.14	1	1	30.74	1.48	1	1	0.84
P52012	cyn-4	Peptidyl-prolyl cis-trans isomerase 4 OS=Caenorhabditis elegans GN=cyn-4 PE=1 SV=3 - [PPIL2_CAEEL]	33.71	2.68	1	1	22.1	3.06	1	1	26.73	3.06	1	1	0.84
Q03615	T23G5.6	Uncharacterized protein T23G5.6 OS=Caenorhabditis elegans GN=T23G5.6 PE=4 SV=2 - [YN06_CAEEL]	36.06	3.28	1	1	39.95	3.28	1	1	48.75	3.28	1	1	0.84
O45818	dkf-2	Serine/threonine-protein kinase dkf-2 OS=Caenorhabditis elegans GN=dkf-2 PE=1 SV=4 - [DKF2_CAEEL]	48.92	1.4	1	1	77.6	1.4	1	1	58.17	1.4	1	1	0.84
P34438	F44E2.8	Uncharacterized protein F44E2.8 OS=Caenorhabditis elegans GN=F44E2.8 PE=4 SV=2 - [YL58_CAEEL]	90.3	5.79	1	1	55.11	5.79	1	1	65.56	5.79	1	1	0.84
Q21018	cri-3	Conserved regulator of innate immunity protein 3 OS=Caenorhabditis elegans GN=cri-3 PE=1 SV=2 - [CRI3_CAEEL]	49.68	5.51	1	1	39.6	5.51	1	1	41.71	5.51	1	1	0.84
Q27504	cah-3	Putative carbonic anhydrase 3 OS=Caenorhabditis elegans GN=cah-3 PE=3 SV=1 - [CAH3_CAEEL]	29.07	6.5	1	1	28.17	6.5	1	1	42.2	6.5	1	1	0.84
O02495	snb-1	Synaptobrevin-1 OS=Caenorhabditis elegans GN=snb-1 PE=1 SV=1 - [SYB1_CAEEL]	41.18	18.35	1	1	20.8	18.35	1	1	31.57	18.35	1	1	0.84
G5EDG2	M03C11.8	SWI/SNF-related matrix-associated actin-dependent regulator of chromatin subfamily A containing DEAD/H box 1 homolog OS=Caenorhabditis elegans GN=M03C11.8 PE=3 SV=1 - [SMRCD_CAEEL]	28.58	0.91	1	1	38.36	0.91	1	1	36.88	0.91	1	1	0.84
P34643	sec-16	Protein transport protein Sec16 OS=Caenorhabditis elegans GN=sec-16 PE=3 SV=1 - [SC16_CAEEL]	38.65	0.89	1	1	23.04	0.89	1	1	51.23	0.89	1	1	0.84
O17905	frm-3	FERM domain (Protein4.1-ezrin-radixin-moesin) family OS=Caenorhabditis elegans GN=frm-3 PE=1 SV=2 - [O17905_CAEEL]	31.74	1.01	1	1	22.3	0.55	1	1	42.92	1.56	1	1	0.84
O45713	CELE_R09B3.3	Uncharacterized protein OS=Caenorhabditis elegans GN=CELE_R09B3.3 PE=1 SV=1 - [O45713_CAEEL]	30.38	17.65	1	1	40.78	17.65	1	1	58.57	17.65	1	1	0.84
G5EF37	pat-10	Paralysed Arrest at Two-fold OS=Caenorhabditis elegans GN=pat-10 PE=1 SV=1 - [G5EF37_CAEEL]	30.72	4.35	1	1	32.84	4.35	1	1	22.93	4.35	1	1	0.84
Q8MNS3	CELE_F42G9.1	Uncharacterized protein OS=Caenorhabditis elegans GN=CELE_F42G9.1 PE=1 SV=1 - [Q8MNS3_CAEEL]	43.52	2.13	1	1	39.64	2.13	1	1	42.99	2.13	1	1	0.84
Q9U277	unc-61	Uncharacterized protein OS=Caenorhabditis elegans GN=unc-61 PE=1 SV=2 - [Q9U277_CAEEL]	25.66	1.74	1	1	32.55	1.74	1	1	28.27	1.74	1	1	0.84
O16517	atp-4	ATP synthase subunit OS=Caenorhabditis elegans GN=atp-4 PE=1 SV=1 - [O16517_CAEEL]	29.91	17.83	1	1	50.6	17.83	1	1	70.17	17.83	1	1	0.84
A7WK41	CELE_Y94H6A.7	Uncharacterized protein OS=Caenorhabditis elegans GN=CELE_Y94H6A.7 PE=1 SV=2 - [A7WK41_CAEEL]	21.88	5.49	1	1	23.5	5.49	1	1	22.3	5.49	1	1	0.84
P90983	rps-29	Ribosomal Protein, Small subunit OS=Caenorhabditis elegans GN=rps-29 PE=1 SV=2 - [P90983_CAEEL]	35.6	19.64	1	1	29.77	19.64	1	1	34.53	19.64	1	1	0.84
Q95QG8	fcp-1	FCP1 (Yeast TFIIF-interacting CTD phosphatase subunit) homolog OS=Caenorhabditis elegans GN=fcp-1 PE=1 SV=2 - [Q95QG8_CAEEL]	62.9	1.52	1	1	63.9	1.52	1	1	50.37	1.52	1	1	0.84
Q18921	snap-1	SNAP (Soluble NSF Attachment Protein) homolog OS=Caenorhabditis elegans GN=snap-1 PE=1 SV=3 - [Q18921_CAEEL]	53.28	3.73	1	1	50.54	3.73	1	1	47.93	3.73	1	1	0.84
G8JYE4	gcp-2.1	See cpr OS=Caenorhabditis elegans GN=gcp-2.1 PE=1 SV=1 - [G8JYE4_CAEEL]	26.82	1.46	1	1	48.53	1.46	1	1	39.2	1.46	1	1	0.84
P34657	ZK632.12	Uncharacterized protein ZK632.12 OS=Caenorhabditis elegans GN=ZK632.12 PE=1 SV=2 - [YOTB_CAEEL]	73.21	6.02	1	1	79.51	6.02	1	1	85.14	6.02	1	1	0.84
Q21878	nhr-1	Nuclear hormone receptor family member nhr-1 OS=Caenorhabditis elegans GN=nhr-1 PE=2 SV=4 - [NHR1_CAEEL]	60.78	3.82	1	1	44.72	2.47	1	1	48.95	2.47	1	1	0.84
Q21342	eak-7	Enhancer of AKt-1 null OS=Caenorhabditis elegans GN=eak-7 PE=1 SV=1 - [Q21342_CAEEL]	65.05	2.76	1	1	67.07	2.76	1	1	0	2.26	1	1	0.84
Q5VKT6	#VALUE!	Nuclear receptor NHR-35 (Fragment) OS=Caenorhabditis elegans PE=2 SV=1 - [Q5VKT6_CAEEL]	47.52	2.46	1	1	42.97	1.85	1	1	44.98	1.85	1	1	0.84
O45373	CELE_F17B5.1	Uncharacterized protein OS=Caenorhabditis elegans GN=CELE_F17B5.1 PE=1 SV=1 - [O45373_CAEEL]	45.63	1.67	1	1	50.68	1.67	1	1	67.79	1.67	1	1	0.84
Q21740	edc-3	Yeast Enhancer of DeCapping homolog OS=Caenorhabditis elegans GN=edc-3 PE=1 SV=1 - [Q21740_CAEEL]	69.85	2.65	1	1	35.92	1.41	1	1	51.46	1.41	1	1	0.84
G5EEG4	mce-1	Methylmalonyl-CoA Epimerase OS=Caenorhabditis elegans GN=mce-1 PE=1 SV=1 - [G5EEG4_CAEEL]	21.45	14.2	1	1	22.07	14.2	1	1	30.18	6.17	1	1	0.84
Q27462	FKBP-2	Peptidyl-prolyl cis-trans isomerase OS=Caenorhabditis elegans GN=FKBP-2 PE=2 SV=1 - [Q27462_CAEEL]	43.21	12.04	1	1	50.52	12.96	1	1	48.64	12.04	1	1	0.84
P10299	gst-1	Glutathione S-transferase P OS=Caenorhabditis elegans GN=gst-1 PE=1 SV=1 - [GSTP1_CAEEL]	47.95	6.73	1	1	46.18	6.73	1	1	56.55	6.73	1	1	0.84
Q18942	prp-38	Yeast PRP (Splicing factor) related OS=Caenorhabditis elegans GN=prp-38 PE=1 SV=1 - [Q18942_CAEEL]	35.59	3.13	1	1	54.77	3.13	1	1	39.35	3.13	1	1	0.84
O45903	W09H1.5	Probable trans-2-enoyl-CoA reductase 1, mitochondrial OS=Caenorhabditis elegans GN=W09H1.5 PE=3 SV=1 - [MECR1_CAEEL]	49.73	3.49	1	1	23.24	3.49	1	1	27.24	3.49	1	1	0.84
Q20627	pam-1	Uncharacterized protein OS=Caenorhabditis elegans GN=pam-1 PE=1 SV=1 - [Q20627_CAEEL]	0	0.79	1	1	33.19	1.02	1	1	27.94	0.79	1	1	0.84
G4S1A4	CELE_F10C1.9	Uncharacterized protein OS=Caenorhabditis elegans GN=CELE_F10C1.9 PE=1 SV=1 - [G4S1A4_CAEEL]	50.61	5.53	1	1	64.55	5.53	1	1	76.9	5.53	1	1	0.84
Q18231	rps-30	Ribosomal Protein, Small subunit OS=Caenorhabditis elegans GN=rps-30 PE=1 SV=1 - [Q18231_CAEEL]	55.59	8.46	1	1	48.68	8.46	1	1	33.1	8.46	1	1	0.84
Q20287	CELE_F41G3.6	Uncharacterized protein OS=Caenorhabditis elegans GN=CELE_F41G3.6 PE=1 SV=2 - [Q20287_CAEEL]	24.46	3.04	1	1	28.93	3.04	1	1	39.84	3.04	1	1	0.84
U4PS45	ric-8	Uncharacterized protein OS=Caenorhabditis elegans GN=ric-8 PE=1 SV=1 - [U4PS45_CAEEL]	35.27	5.03	1	1	38.25	5.03	1	1	44.14	5.03	1	1	0.84
P90984	trpp-11	TRansport Protein Particle OS=Caenorhabditis elegans GN=trpp-11 PE=1 SV=1 - [P90984_CAEEL]	32.69	0.9	1	1	22.71	0.81	1	1	38.26	0.63	1	1	0.84
Q18598	pmp-2	Peroxisomal Membrane Protein related OS=Caenorhabditis elegans GN=pmp-2 PE=1 SV=1 - [Q18598_CAEEL]	58.46	1.97	1	1	62.27	1.97	1	1	35.95	2.72	1	1	0.84
Q9N3D9	nduf-5	NADH Ubiquinone oxidoreductase Fe-S protein OS=Caenorhabditis elegans GN=nduf-5 PE=1 SV=1 - [Q9N3D9_CAEEL]	43.81	13.22	1	1	44.6	13.22	1	1	35.13	13.22	1	1	0.84
Q8I4G9	dab-1	DAB (Drosophila disabled) homolog OS=Caenorhabditis elegans GN=dab-1 PE=1 SV=3 - [Q8I4G9_CAEEL]	47.95	2.74	1	1	62.91	2.74	1	1	71.33	2.74	1	1	0.84
B3VKU3	dcap-2	Decapping enzyme 2 (Fragment) OS=Caenorhabditis elegans GN=dcap-2 PE=2 SV=1 - [B3VKU3_CAEEL]	84.36	6.09	1	1	85.36	6.09	1	1	47.4	6.09	1	1	0.84
P90879	CELE_F49C12.9	Uncharacterized protein OS=Caenorhabditis elegans GN=CELE_F49C12.9 PE=1 SV=1 - [P90879_CAEEL]	83.45	4.26	1	1	78.75	4.26	1	1	38.27	5.57	1	1	0.84
Q22013	CELE_R186.3	Uncharacterized protein OS=Caenorhabditis elegans GN=CELE_R186.3 PE=1 SV=1 - [Q22013_CAEEL]	29.04	4.17	1	1	32.42	4.17	1	1	29.59	4.17	1	1	0.84
Q22618	adr-2	Probable double-stranded RNA-specific adenosine deaminase OS=Caenorhabditis elegans GN=adr-2 PE=2 SV=2 - [ADR2_CAEEL]	36.72	2.63	1	1	30.64	2.63	1	1	27.55	2.63	1	1	0.84
Q9N4L6	CELE_ZK973.11	Uncharacterized protein OS=Caenorhabditis elegans GN=CELE_ZK973.11 PE=1 SV=2 - [Q9N4L6_CAEEL]	34.58	2.91	1	1	31.57	2.91	1	1	32.83	2.91	1	1	0.84
O18229	Y57G11C.3	Putative 6-phosphogluconolactonase OS=Caenorhabditis elegans GN=Y57G11C.3 PE=3 SV=2 - [6PGL_CAEEL]	40.1	4.46	1	1	43.86	4.46	1	1	34.24	4.46	1	1	0.84
O16927	F25G6.8	Signal recognition particle 14 kDa protein OS=Caenorhabditis elegans GN=F25G6.8 PE=3 SV=1 - [SRP14_CAEEL]	28.3	5.17	1	1	28.47	5.17	1	1	28.59	5.17	1	1	0.84
Q7YZW5	vem-1	VEMA (Mammalian ventral midline antigen) related OS=Caenorhabditis elegans GN=vem-1 PE=1 SV=1 - [Q7YZW5_CAEEL]	31.05	6.56	1	1	55.51	8.74	1	1	46.3	6.56	1	1	0.84
P90993	mrpl-41	39S ribosomal protein L41, mitochondrial OS=Caenorhabditis elegans GN=mrpl-41 PE=3 SV=1 - [RM41_CAEEL]	21.83	8.33	1	1	26.95	6.67	1	1	23.34	8.89	1	1	0.84
Q09527	E02H1.6	Adenylate kinase isoenzyme 6 homolog OS=Caenorhabditis elegans GN=E02H1.6 PE=1 SV=2 - [KAD6_CAEEL]	43.3	5.49	1	1	43.28	5.49	1	1	47.59	5.49	1	1	0.84
Q09556	F33H1.3	Uncharacterized protein F33H1.3 OS=Caenorhabditis elegans GN=F33H1.3 PE=4 SV=1 - [YQW3_CAEEL]	26.01	4.46	1	1	43.94	4.46	1	1	31.18	2.23	1	1	0.84
Q9N408	tim-8	Mitochondrial import inner membrane translocase subunit tim-8 OS=Caenorhabditis elegans GN=tim-8 PE=3 SV=1 - [TIM8_CAEEL]	50.02	13.25	1	1	34.97	13.25	1	1	38.67	13.25	1	1	0.84
Q18739	C50F4.1	Uncharacterized protein OS=Caenorhabditis elegans GN=C50F4.1 PE=1 SV=2 - [Q18739_CAEEL]	32.62	2.49	1	1	26.48	2.49	1	1	30.13	2.76	1	1	0.84
Q20709	tra-4	TRAnsformer: XX animals transformed into males OS=Caenorhabditis elegans GN=tra-4 PE=1 SV=2 - [Q20709_CAEEL]	46.97	1.66	1	1	46.94	1.66	1	1	45.93	1.66	1	1	0.84
O62214	CELE_F33A8.4	Uncharacterized protein OS=Caenorhabditis elegans GN=CELE_F33A8.4 PE=1 SV=1 - [O62214_CAEEL]	26.58	3.21	1	1	27.85	2.14	1	1	46.96	2.78	1	1	0.84
O44413	ears-2	Glutamyl(E) Amino-acyl tRNA Synthetase OS=Caenorhabditis elegans GN=ears-2 PE=1 SV=2 - [O44413_CAEEL]	29.76	2.08	1	1	32.35	2.08	1	1	46.25	2.08	1	1	0.84
O44983	CELE_K02F2.5	Uncharacterized protein OS=Caenorhabditis elegans GN=CELE_K02F2.5 PE=1 SV=2 - [O44983_CAEEL]	80.87	5.45	1	1	74.16	5.45	1	1	75.05	5.45	1	1	0.84
Q22170	ile-2	Intracellular LEctin OS=Caenorhabditis elegans GN=ile-2 PE=1 SV=2 - [Q22170_CAEEL]	33	3.17	1	1	30.67	4.32	1	1	36.64	3.17	1	1	0.84
A3RMS7	C37H5.13	Uncharacterized protein OS=Caenorhabditis elegans GN=C37H5.13 PE=1 SV=1 - [A3RMS7_CAEEL]	61.28	12.12	1	1	56.24	12.12	1	1	61.92	12.12	1	1	0.84
Q9XU81	trpp-6	TRansport Protein Particle OS=Caenorhabditis elegans GN=trpp-6 PE=1 SV=1 - [Q9XU81_CAEEL]	22.81	7.03	1	1	27.09	4.86	1	1	26.78	4.86	1	1	0.84
O16254	CELE_F44E7.9	Uncharacterized protein OS=Caenorhabditis elegans GN=CELE_F44E7.9 PE=1 SV=1 - [O16254_CAEEL]	48.65	12.4	1	1	56.2	12.4	1	1	69.18	12.4	1	1	0.84
F0IWS9	CELE_R13D11.4	Uncharacterized protein OS=Caenorhabditis elegans GN=CELE_R13D11.4 PE=1 SV=1 - [F0IWS9_CAEEL]	38.86	5.73	1	1	29.19	5.73	1	1	48.03	7.05	1	1	0.84
O45812	CELE_T23G11.7	Uncharacterized protein OS=Caenorhabditis elegans GN=CELE_T23G11.7 PE=1 SV=4 - [O45812_CAEEL]	44.58	8.01	1	1	46.92	4.49	1	1	33.73	4.49	1	1	0.84
Q9U2C3	rab-35	RAB family OS=Caenorhabditis elegans GN=rab-35 PE=1 SV=1 - [Q9U2C3_CAEEL]	42.95	5.26	1	1	133.98	20.57	4	4	120.62	19.62	3	3	0.83
Q19328	tsn-1	Tudor Staphylococcal Nuclease homolog OS=Caenorhabditis elegans GN=tsn-1 PE=1 SV=1 - [Q19328_CAEEL]	3381.59	46.72	42	113	3124.33	48.69	41	96	4232.17	58.86	49	124	0.83
Q9N3X2	rps-4	40S ribosomal protein S4 OS=Caenorhabditis elegans GN=rps-4 PE=1 SV=1 - [RS4_CAEEL]	1794.38	66.8	23	80	1603.88	59.46	21	72	2301.93	75.68	27	91	0.83
O45815	act-5	ACTin OS=Caenorhabditis elegans GN=act-5 PE=1 SV=1 - [O45815_CAEEL]	2743.08	63.47	25	83	1677.77	58.93	24	55	2731.54	70.67	25	81	0.83
P19625	mlc-1	Myosin regulatory light chain 1 OS=Caenorhabditis elegans GN=mlc-1 PE=3 SV=1 - [MLR1_CAEEL]	1708.68	71.76	16	54	2442.29	76.47	18	69	3175.01	77.06	20	75	0.83
O17218	rps-22	Ribosomal Protein, Small subunit OS=Caenorhabditis elegans GN=rps-22 PE=1 SV=1 - [O17218_CAEEL]	2024.98	76.15	14	51	1972.26	73.85	13	49	2710.08	76.15	14	60	0.83
P46769	rps-0	40S ribosomal protein SA OS=Caenorhabditis elegans GN=rps-0 PE=1 SV=3 - [RSSA_CAEEL]	1017.03	64.13	13	38	701.535	54.35	11	24	1263.74	61.96	13	36	0.83
Q95Y90	rpl-9	60S ribosomal protein L9 OS=Caenorhabditis elegans GN=rpl-9 PE=3 SV=1 - [RL9_CAEEL]	866.272	45.5	9	28	835.14	61.38	12	27	1504.55	61.38	11	33	0.83
Q18074	C18B2.3	Uncharacterized protein OS=Caenorhabditis elegans GN=C18B2.3 PE=1 SV=2 - [Q18074_CAEEL]	592.194	56.36	9	17	499.907	57.2	9	15	677.883	57.63	10	19	0.83
Q21443	lmn-1	Lamin-1 OS=Caenorhabditis elegans GN=lmn-1 PE=1 SV=2 - [LMN1_CAEEL]	414.358	26.86	13	18	330.498	13.96	8	10	453.396	25.44	11	16	0.83
O16785	pat-6	Paralyzed arrest at two-fold protein 6 OS=Caenorhabditis elegans GN=pat-6 PE=1 SV=1 - [PARV_CAEEL]	370.145	28.8	9	11	155.97	13.87	4	5	259.698	21.87	8	9	0.83
G5EEV5	pud-3	5C820 OS=Caenorhabditis elegans GN=pud-3 PE=1 SV=1 - [G5EEV5_CAEEL]	390.925	48.84	5	8					166.76	31.4	3	4	0.83
P91136	C37H5.5	Nucleolar complex protein 3 homolog OS=Caenorhabditis elegans GN=C37H5.5 PE=3 SV=3 - [NOC3L_CAEEL]	70.44	3.21	3	3	44.04	1.41	1	1	55.5	2.57	2	2	0.83
P49029	mag-1	Protein mago nashi homolog OS=Caenorhabditis elegans GN=mag-1 PE=1 SV=2 - [MGN_CAEEL]	170.27	9.87	3	3	64.84	9.87	1	1	80.98	9.87	2	2	0.83
Q95005	pas-4	Proteasome subunit alpha type-7 OS=Caenorhabditis elegans GN=pas-4 PE=1 SV=1 - [PSA7_CAEEL]	210.03	20.16	3	3	86.35	4.74	1	1	74.2	4.74	1	2	0.83
P52013	cyn-5	Peptidyl-prolyl cis-trans isomerase 5 OS=Caenorhabditis elegans GN=cyn-5 PE=1 SV=2 - [CYP5_CAEEL]	70.5159	15.69	3	3	37.01	3.92	1	1	39.45	8.33	2	2	0.83
Q8ITV7	CELE_Y44E3A.6	Uncharacterized protein OS=Caenorhabditis elegans GN=CELE_Y44E3A.6 PE=1 SV=1 - [Q8ITV7_CAEEL]	74.5533	4.04	3	3	22.86	2.14	1	1	53.52	2.85	2	2	0.83
O76561	CELE_F13C5.2	Uncharacterized protein OS=Caenorhabditis elegans GN=CELE_F13C5.2 PE=1 SV=1 - [O76561_CAEEL]	108.727	9.36	2	3	35.3	4.81	1	1	29.77	7.49	2	2	0.83
P34669	ZK686.3	Probable dolichyl-diphosphooligosaccharide--protein glycosyltransferase subunit 3 OS=Caenorhabditis elegans GN=ZK686.3 PE=3 SV=2 - [OST3_CAEEL]	121.837	6.18	2	3	32.74	3.24	1	1	84.12	6.18	2	2	0.83
G5ECK7	dli-1	Dynein Light Intermediate chain OS=Caenorhabditis elegans GN=dli-1 PE=1 SV=1 - [G5ECK7_CAEEL]	188.753	10.88	3	3	83.26	3.4	1	1	129.36	7.26	2	2	0.83
Q9N489	Y110A2AR.3	Uncharacterized protein OS=Caenorhabditis elegans GN=Y110A2AR.3 PE=1 SV=1 - [Q9N489_CAEEL]	69.3433	19.49	3	3	42.19	5.08	1	1	82.8	13.56	2	2	0.83
D0PV95	laf-1	Putative DEAD-box RNA helicase OS=Caenorhabditis elegans GN=laf-1 PE=1 SV=1 - [D0PV95_CAEEL]	3041.71	33.05	25	107	2327.04	39.97	30	86	3360.11	44.63	33	113	0.82
O18688	tba-1	TuBulin, Alpha OS=Caenorhabditis elegans GN=tba-1 PE=1 SV=1 - [O18688_CAEEL]	2541.43	57.46	23	86	2317.6	48.33	23	87	3185.87	54.57	28	103	0.82
Q18265	fust-1	FUS/TLS RNA binding protein homolog OS=Caenorhabditis elegans GN=fust-1 PE=1 SV=2 - [Q18265_CAEEL]	1590.51	21.65	11	44	2492.32	24.33	13	71	3049.02	38.84	16	70	0.82
Q9U2U0	uaf-2	U2AF splicing factor OS=Caenorhabditis elegans GN=uaf-2 PE=1 SV=1 - [Q9U2U0_CAEEL]	1049.16	48.42	14	26	1154.16	58.25	16	31	1234.13	69.47	18	34	0.82
O45168	ifc-1	Intermediate filament protein ifc-1 OS=Caenorhabditis elegans GN=ifc-1 PE=3 SV=2 - [IFC1_CAEEL]	636.15	30.4	15	27	611.356	32.8	16	24	671.896	32	16	30	0.82
G5EGR6	alg-1	Protein argonaute OS=Caenorhabditis elegans GN=alg-1 PE=1 SV=1 - [G5EGR6_CAEEL]	572.232	16.07	14	29	313.04	16.07	14	18	778.741	18.36	15	27	0.82
Q09450	C05C10.3	Probable succinyl-CoA:3-ketoacid coenzyme A transferase, mitochondrial OS=Caenorhabditis elegans GN=C05C10.3 PE=3 SV=1 - [SCOT_CAEEL]	622.681	30.71	11	19	606.912	30.71	11	20	588.642	31.67	13	23	0.82
O02640	mdh-2	Probable malate dehydrogenase, mitochondrial OS=Caenorhabditis elegans GN=mdh-2 PE=3 SV=1 - [MDHM_CAEEL]	427.908	42.82	12	15	514.108	61.88	15	23	747.662	62.17	14	23	0.82
O62431	ers-1	Probable glutamine--tRNA ligase OS=Caenorhabditis elegans GN=ers-1 PE=3 SV=1 - [SYQ_CAEEL]	149.467	9.67	8	10	77.56	10.31	9	9	169.984	12.09	9	11	0.82
P46548	nmt-1	Probable glycylpeptide N-tetradecanoyltransferase OS=Caenorhabditis elegans GN=nmt-1 PE=3 SV=1 - [NMT_CAEEL]	238.067	21.56	7	10	162.697	17.11	6	9	403.178	22.67	8	11	0.82
Q8WTM6	arx-4	Probable actin-related protein 2/3 complex subunit 2 OS=Caenorhabditis elegans GN=arx-4 PE=3 SV=1 - [ARPC2_CAEEL]	161.75	25.58	7	7	261.66	29.57	7	10	294.261	32.56	8	10	0.82
P30625	kin-2	cAMP-dependent protein kinase regulatory subunit OS=Caenorhabditis elegans GN=kin-2 PE=1 SV=3 - [KAPR_CAEEL]	260.732	31.69	10	10	169.394	18.03	5	6	295.52	24.59	8	9	0.82
Q9XTU9	glrx-5	Glutaredoxin OS=Caenorhabditis elegans GN=glrx-5 PE=1 SV=1 - [Q9XTU9_CAEEL]	90.68	19.01	2	3	111.14	25.35	3	4	130.868	25.35	3	4	0.82
Q9BKQ9	cisd-3.2	CDGSH Iron Sulfur Domain protein homolog OS=Caenorhabditis elegans GN=cisd-3.2 PE=1 SV=1 - [Q9BKQ9_CAEEL]	102.757	19.87	2	3	110.825	20.51	2	4	193.33	34.62	3	4	0.82
Q23495	toe-1	HEAT repeat-containing protein 1 homolog OS=Caenorhabditis elegans GN=toe-1 PE=3 SV=1 - [HEAT1_CAEEL]	87.44	3.39	5	5	25.93	0.67	1	1	81.68	1.15	2	3	0.82
Q05036	C30C11.4	Uncharacterized protein C30C11.4 OS=Caenorhabditis elegans GN=C30C11.4 PE=3 SV=1 - [YLA4_CAEEL]	159.04	6.96	4	5	48.05	1.68	1	1	114.103	3.61	2	3	0.82
Q9N3E2	mab-31	Uncharacterized protein OS=Caenorhabditis elegans GN=mab-31 PE=1 SV=1 - [Q9N3E2_CAEEL]	119.346	11.71	4	5	65.67	1.87	1	1	75.6548	7.96	3	3	0.82
O17909	chd-1	Chromodomain and Helicase Domain protein OS=Caenorhabditis elegans GN=chd-1 PE=1 SV=2 - [O17909_CAEEL]	126.53	2.53	4	5	27.9	0.96	1	1	120.84	1.64	2	3	0.82
P91128	rpl-13	60S ribosomal protein L13 OS=Caenorhabditis elegans GN=rpl-13 PE=3 SV=1 - [RL13_CAEEL]	1157.69	58.45	16	40	698.814	50.24	13	28	1128.33	51.21	16	39	0.81
P42168	kin-19	Casein kinase I isoform alpha OS=Caenorhabditis elegans GN=kin-19 PE=3 SV=1 - [KC1A_CAEEL]	994.574	41.35	13	35	812.028	41.64	14	31	1068.23	48.97	17	38	0.81
Q19162	rpl-11.2	Ribosomal Protein, Large subunit OS=Caenorhabditis elegans GN=rpl-11.2 PE=1 SV=1 - [Q19162_CAEEL]	718.99	37.76	8	33	688.011	31.12	6	28	1022.62	61.22	11	35	0.81
Q9TZC4	pat-4	Integrin-linked protein kinase homolog pat-4 OS=Caenorhabditis elegans GN=pat-4 PE=1 SV=1 - [ILKH_CAEEL]	471.765	31.33	13	23	349.002	30.26	13	25	784.063	38.2	15	28	0.81
P34255	B0303.3	Uncharacterized protein B0303.3 OS=Caenorhabditis elegans GN=B0303.3 PE=3 SV=1 - [YKA3_CAEEL]	428.611	30.8	13	19	602.381	31.03	15	25	806.823	31.7	13	26	0.81
Q19579	pab-2	Polyadenylate-binding protein OS=Caenorhabditis elegans GN=pab-2 PE=1 SV=1 - [Q19579_CAEEL]	928.871	16.47	10	29	397.067	12.72	8	14	776.387	15.17	10	24	0.81
Q86S66	icd-2	Nascent polypeptide-associated complex subunit alpha OS=Caenorhabditis elegans GN=icd-2 PE=1 SV=1 - [NACA_CAEEL]	523.182	53.81	9	19	603.255	41.62	6	16	668.69	60.41	9	20	0.81
P91871	fasn-1	Fatty Acid SyNthase OS=Caenorhabditis elegans GN=fasn-1 PE=1 SV=2 - [P91871_CAEEL]	624.989	9.57	23	31	143.37	1.99	5	5	349.114	6.28	15	19	0.81
P90992	misc-1	MItochondrial Solute Carrier OS=Caenorhabditis elegans GN=misc-1 PE=1 SV=2 - [P90992_CAEEL]	420.007	26.8	7	13	509.475	30.39	9	16	661.535	30.39	9	17	0.81
O01974	eif-3.H	Eukaryotic translation initiation factor 3 subunit H OS=Caenorhabditis elegans GN=eif-3.H PE=3 SV=2 - [EIF3H_CAEEL]	323.243	21.64	6	11	204.73	15.34	4	7	339.006	23.29	7	10	0.81
Q9N477	CELE_Y23H5B.5	Uncharacterized protein OS=Caenorhabditis elegans GN=CELE_Y23H5B.5 PE=1 SV=2 - [Q9N477_CAEEL]	181.642	12.12	5	7	143.82	8.56	4	4	141.017	9.98	5	6	0.81
Q9N4I3	CELE_Y71F9AL.9	Uncharacterized protein OS=Caenorhabditis elegans GN=CELE_Y71F9AL.9 PE=1 SV=1 - [Q9N4I3_CAEEL]	256.824	29.94	5	7	33.64	4.78	1	1	185.64	21.97	4	4	0.81
Q9NEN6	rps-6	40S ribosomal protein S6 OS=Caenorhabditis elegans GN=rps-6 PE=1 SV=1 - [RS6_CAEEL]	2797.81	52.85	22	79	2284.24	47.97	21	62	3114.36	58.13	23	80	0.8
P50880	rpl-3	60S ribosomal protein L3 OS=Caenorhabditis elegans GN=rpl-3 PE=2 SV=1 - [RL3_CAEEL]	1517.93	47.13	20	68	1122.41	35.41	12	42	1784.45	52.12	21	62	0.8
P98080	ucr-1	Cytochrome b-c1 complex subunit 1, mitochondrial OS=Caenorhabditis elegans GN=ucr-1 PE=3 SV=2 - [UCR1_CAEEL]	1273.22	55.41	21	39	1915.6	64.76	25	51	2008.64	59.87	25	53	0.8
P51404	rps-13	40S ribosomal protein S13 OS=Caenorhabditis elegans GN=rps-13 PE=3 SV=2 - [RS13_CAEEL]	893.406	34.44	9	39	798.131	38.41	9	34	1101.47	38.41	9	42	0.8
Q9XU45	B0379.1	Uncharacterized protein OS=Caenorhabditis elegans GN=B0379.1 PE=1 SV=1 - [Q9XU45_CAEEL]	439.943	57.08	12	19	256.08	33.96	6	10	412.992	55.19	10	16	0.8
Q19713	frs-2	Phenylalanine--tRNA ligase beta subunit OS=Caenorhabditis elegans GN=frs-2 PE=3 SV=2 - [SYFB_CAEEL]	126.781	15.91	9	9	269.086	23.18	12	15	316.499	18.78	9	14	0.8
G5EF72	#VALUE!	G protein a(S) subunit OS=Caenorhabditis elegans PE=2 SV=1 - [G5EF72_CAEEL]	203.753	11.73	4	6	233.155	16.27	6	8	209.812	16.27	6	8	0.8
Q9NA98	arp-1	Actin-Related Proteins OS=Caenorhabditis elegans GN=arp-1 PE=1 SV=2 - [Q9NA98_CAEEL]	189.873	17.65	5	8	151.72	17.65	4	5	215.498	20.32	6	7	0.8
O45502	dnj-12	DNaJ domain (Prokaryotic heat shock protein) OS=Caenorhabditis elegans GN=dnj-12 PE=1 SV=1 - [O45502_CAEEL]	42.47	5.22	2	2	75.45	7.21	3	5	82.11	10.95	3	4	0.8
O16582	mtq-2	MethylTransferase modifying glutamine (Q) OS=Caenorhabditis elegans GN=mtq-2 PE=1 SV=3 - [O16582_CAEEL]		0			53.94	14.93	2	2	39.63	5.88	1	1	0.8
Q18964	wdfy-2	WD repeat and FYVE domain-containing protein 2 OS=Caenorhabditis elegans GN=wdfy-2 PE=1 SV=1 - [WDFY2_CAEEL]					95.71	6.75	2	2	30.74	1.93	1	1	0.8
P90994	djr-1.1	Glutathione-independent glyoxalase DJR-1.1 OS=Caenorhabditis elegans GN=djr-1.1 PE=1 SV=1 - [DJ11_CAEEL]					65.88	12.83	2	2	55.63	5.88	1	1	0.8
G5EFS1	ikb-1	I Kappa B homolog OS=Caenorhabditis elegans GN=ikb-1 PE=1 SV=1 - [G5EFS1_CAEEL]					69.13	2.35	1	2	65.15	2.35	1	1	0.8
O44498	set-9	SET (Trithorax/polycomb) domain containing OS=Caenorhabditis elegans GN=set-9 PE=1 SV=2 - [O44498_CAEEL]					47.22	1.97	2	2	21.39	0.8	1	1	0.8
O45418	fkb-6	FK506-Binding protein family OS=Caenorhabditis elegans GN=fkb-6 PE=1 SV=1 - [O45418_CAEEL]					45.1173	4.87	2	2	20.04	2.78	1	1	0.8
G5EDR8	unc-26	Synaptojanin UNC-26C OS=Caenorhabditis elegans GN=unc-26 PE=1 SV=1 - [G5EDR8_CAEEL]					24.09	3.39	2	2	31.17	2.39	1	1	0.8
G5EGA6	dhrs-4	Dehydrogenase/reductase SDR family member 4 OS=Caenorhabditis elegans GN=dhrs-4 PE=1 SV=1 - [DHRS4_CAEEL]					41.24	13.08	2	2	67.15	5	1	1	0.8
O18235	coq-3	COenzyme Q (Ubiquinone) biosynthesis OS=Caenorhabditis elegans GN=coq-3 PE=1 SV=1 - [O18235_CAEEL]					103.03	10.82	2	2	88.08	6.34	1	1	0.8
Q23281	toc-1	Similar to Transporter Of divalent Cations OS=Caenorhabditis elegans GN=toc-1 PE=1 SV=2 - [Q23281_CAEEL]					54.16	5.14	2	2	27.92	3.27	1	1	0.8
Q9U2D2	cku-70	Caenorhabditis KU OS=Caenorhabditis elegans GN=cku-70 PE=1 SV=3 - [Q9U2D2_CAEEL]					77.399	3.68	2	2	33.55	1.18	1	1	0.8
O61791	mrps-6	Mitochondrial Ribosomal Protein, Small OS=Caenorhabditis elegans GN=mrps-6 PE=1 SV=2 - [O61791_CAEEL]					43.08	15.43	2	2	22.88	9.26	1	1	0.8
Q8WQG5	lmtr-3	Late endosomal/lysosomal adaptor, Mapk (MAPK) and mToR (MTOR) activator homolog OS=Caenorhabditis elegans GN=lmtr-3 PE=1 SV=1 - [Q8WQG5_CAEEL]					57.18	12.41	2	2	23.23	12.41	1	1	0.8
O17287	tomm-22	Translocase of Outer Mitochondrial Membrane OS=Caenorhabditis elegans GN=tomm-22 PE=1 SV=1 - [O17287_CAEEL]	261.289	38.53	3	6	86.33	11.93	1	2	128.11	24.77	2	4	0.79
P91914	rpl-27	60S ribosomal protein L27 OS=Caenorhabditis elegans GN=rpl-27 PE=2 SV=1 - [RL27_CAEEL]	796.092	49.26	8	29	652.444	52.21	9	23	828.726	52.21	11	29	0.79
Q86NC2	nuo-2	NADH Ubiquinone Oxidoreductase OS=Caenorhabditis elegans GN=nuo-2 PE=1 SV=1 - [Q86NC2_CAEEL]	538.751	48.51	11	17	559.14	47.76	11	15	595.308	49.25	12	18	0.79
Q9TYV5	nol-1	NucleOLar protein OS=Caenorhabditis elegans GN=nol-1 PE=1 SV=2 - [Q9TYV5_CAEEL]	368.545	9.79	6	13	304.649	9.94	6	9	397.74	14.61	8	12	0.79
Q93168	C01G10.8	Uncharacterized protein OS=Caenorhabditis elegans GN=C01G10.8 PE=1 SV=1 - [Q93168_CAEEL]	463.039	39.47	10	14	156.85	22.22	5	5	202.04	35.67	9	10	0.79
Q18967	eif-3.F	Eukaryotic translation initiation factor 3 subunit F OS=Caenorhabditis elegans GN=eif-3.F PE=3 SV=1 - [EIF3F_CAEEL]	200.61	14.63	3	7	234.464	14.63	3	9	278.682	15.99	3	9	0.79
P46975	stt-3	Dolichyl-diphosphooligosaccharide--protein glycosyltransferase subunit stt-3 OS=Caenorhabditis elegans GN=stt-3 PE=1 SV=1 - [STT3_CAEEL]	90.41	2.51	2	4	46.62	2.51	2	2	86.8167	2.51	2	3	0.79
D5MCN2	larp-1	La-related protein 1 OS=Caenorhabditis elegans GN=larp-1 PE=3 SV=2 - [LARP1_CAEEL]	113.53	3.04	3	4	0	1.3	2	2	85.4497	2.26	3	3	0.79
O18199	mrpl-37	Mitochondrial Ribosomal Protein, Large OS=Caenorhabditis elegans GN=mrpl-37 PE=1 SV=3 - [O18199_CAEEL]	115.32	14.35	4	4	50.4943	4.17	2	2	85.5667	8.56	3	3	0.79
Q17606	rpl-24.2	Probable ribosome biogenesis protein RLP24 OS=Caenorhabditis elegans GN=rpl-24.2 PE=3 SV=1 - [RLP24_CAEEL]	190.827	9.26	2	4	116.13	9.26	1	2	96.9633	9.26	1	3	0.79
Q22516	chd-3	Chromodomain-helicase-DNA-binding protein 3 homolog OS=Caenorhabditis elegans GN=chd-3 PE=2 SV=2 - [CHD3_CAEEL]	38.92	1.01	2	2	51.1699	1.01	2	2	50.9799	1.01	2	2	0.79
P39745	mpk-1	Mitogen-activated protein kinase mpk-1 OS=Caenorhabditis elegans GN=mpk-1 PE=1 SV=2 - [MPK1_CAEEL]	68.8162	5.86	2	2	58.8882	6.98	2	2	89.4662	5.86	2	2	0.79
Q23500	aco-1	Probable cytoplasmic aconitate hydratase OS=Caenorhabditis elegans GN=aco-1 PE=1 SV=1 - [ACOC_CAEEL]	32.16	2.37	2	2	48.52	3.04	2	2	50.99	2.82	2	2	0.79
P34442	F54C8.4	Probable tyrosine-protein phosphatase F54C8.4 OS=Caenorhabditis elegans GN=F54C8.4 PE=3 SV=1 - [PTP5_CAEEL]	57.57	6.69	2	2	74.54	6.69	2	2	82.58	6.69	2	2	0.79
Q20636	gpb-2	Guanine nucleotide-binding protein subunit beta-2 OS=Caenorhabditis elegans GN=gpb-2 PE=1 SV=2 - [GBB2_CAEEL]	70.0282	7.3	2	2	32.7471	2.81	1	2	44.6199	5.62	2	2	0.79
G5EGP8	cpz-1	CathePsin Z OS=Caenorhabditis elegans GN=cpz-1 PE=1 SV=1 - [G5EGP8_CAEEL]	42.24	3.92	1	2	67.29	3.92	1	2	59.99	5.56	2	2	0.79
Q17624	arrd-25	ARRestin Domain protein OS=Caenorhabditis elegans GN=arrd-25 PE=1 SV=1 - [Q17624_CAEEL]	0	1.03	1	2	31.98	1.03	1	2	36.0914	3.94	2	2	0.79
Q7JPI2	suf-1	Suppressor of forked homolog OS=Caenorhabditis elegans GN=suf-1 PE=2 SV=1 - [Q7JPI2_CAEEL]	44.6365	2.47	2	2	40.63	2.47	2	2	48.8984	2.47	2	2	0.79
H2L0N0	unc-132	Uncharacterized protein OS=Caenorhabditis elegans GN=unc-132 PE=1 SV=1 - [H2L0N0_CAEEL]	80.67	4.57	2	2	90.69	4.57	2	2	91.41	5.25	2	2	0.79
Q5DX36	C33F10.14	Uncharacterized protein OS=Caenorhabditis elegans GN=C33F10.14 PE=1 SV=1 - [Q5DX36_CAEEL]	72.65	12.39	2	2	42.05	10.55	2	2	95.97	12.84	2	2	0.79
Q19714	CELE_F22B5.10	Uncharacterized protein OS=Caenorhabditis elegans GN=CELE_F22B5.10 PE=1 SV=1 - [Q19714_CAEEL]	23.98	12.37	2	2	27.41	12.37	2	2	62.66	12.37	2	2	0.79
Q23280	daf-41	Co-chaperone protein daf-41 OS=Caenorhabditis elegans GN=daf-41 PE=2 SV=1 - [DAF41_CAEEL]	46.05	15.43	2	2	80.14	16.57	2	2	32.7999	16.57	2	2	0.79
Q02332	pdhk-2	Probable [pyruvate dehydrogenase (acetyl-transferring)] kinase, mitochondrial OS=Caenorhabditis elegans GN=pdhk-2 PE=3 SV=1 - [PDHK2_CAEEL]	116.25	8.98	2	2	103.8	7.23	2	2	95.23	8.98	2	2	0.79
Q22843	grsp-2	Glycine Rich Secreted Protein OS=Caenorhabditis elegans GN=grsp-2 PE=1 SV=2 - [Q22843_CAEEL]	43.54	8.19	2	2	54.4	8.19	2	2	62.68	8.19	2	2	0.79
O61880	CELE_F59B1.2	Uncharacterized protein OS=Caenorhabditis elegans GN=CELE_F59B1.2 PE=1 SV=1 - [O61880_CAEEL]	41.92	29.19	2	2	49.22	30.43	2	2	48.53	29.19	2	2	0.79
I7FW40	rab-14	Rab-14 (Fragment) OS=Caenorhabditis elegans GN=rab-14 PE=2 SV=1 - [I7FW40_CAEEL]	81.77	12.44	2	2	76.98	11.96	2	2	50.21	11.96	2	2	0.79
Q8ITV4	CELE_H14E04.2	Uncharacterized protein OS=Caenorhabditis elegans GN=CELE_H14E04.2 PE=1 SV=1 - [Q8ITV4_CAEEL]	138.664	11.92	5	5	177.307	13.91	6	6	111.167	11.48	5	6	0.78
Q19335	repo-1	REversed POlarity in early embryos OS=Caenorhabditis elegans GN=repo-1 PE=1 SV=2 - [Q19335_CAEEL]	156.163	19.82	2	3	216.567	27.48	3	6	193.22	27.48	3	5	0.78
Q8MXS1	rab-18	Ras-related protein Rab-18 OS=Caenorhabditis elegans GN=rab-18 PE=3 SV=1 - [RAB18_CAEEL]	35.35	9.36	1	1	179.304	22.66	3	6	134.97	24.14	3	4	0.78
G5EDD4	tba-4	TuBulin, Alpha OS=Caenorhabditis elegans GN=tba-4 PE=1 SV=1 - [G5EDD4_CAEEL]	2065.17	43.08	18	66	1909.3	34.82	17	66	2672.59	47.99	21	74	0.78
O18154	tba-7	TuBulin, Alpha OS=Caenorhabditis elegans GN=tba-7 PE=1 SV=1 - [O18154_CAEEL]	1529.08	30.63	13	49	1607.58	24.1	12	52	1962.47	36.71	17	57	0.78
Q09533	rpl-10	60S ribosomal protein L10 OS=Caenorhabditis elegans GN=rpl-10 PE=3 SV=1 - [RL10_CAEEL]	847.151	45.33	13	41	757.793	44.86	13	36	927.197	59.81	15	43	0.78
P0CG71	ubq-1	Polyubiquitin-A OS=Caenorhabditis elegans GN=ubq-1 PE=3 SV=1 - [UBIQ1_CAEEL]	368.026	51.19	6	20	714.022	69.57	6	26	702.912	69.57	6	26	0.78
P20163	hsp-4	Heat shock 70 kDa protein D OS=Caenorhabditis elegans GN=hsp-4 PE=1 SV=2 - [HSP7D_CAEEL]	1006.69	10.81	7	22	951.959	11.57	8	21	1129.23	10.81	7	24	0.78
O01869	rps-10	Ribosomal Protein, Small subunit OS=Caenorhabditis elegans GN=rps-10 PE=1 SV=1 - [O01869_CAEEL]	754.971	54.36	8	23	495.301	47.65	7	14	671.124	49.66	8	20	0.78
Q95XM9	ddx-27	DEAD boX helicase homolog OS=Caenorhabditis elegans GN=ddx-27 PE=1 SV=2 - [Q95XM9_CAEEL]	582.321	17.46	11	22	248.766	7.44	5	10	446.485	15.97	10	17	0.78
C9IY22	CELE_ZK1058.9	Uncharacterized protein OS=Caenorhabditis elegans GN=CELE_ZK1058.9 PE=1 SV=1 - [C9IY22_CAEEL]	398.531	50	10	18	275.862	41.07	7	10	310.812	43.3	10	15	0.78
G5EC91	dpy-11	DumPY: shorter than wild-type OS=Caenorhabditis elegans GN=dpy-11 PE=1 SV=1 - [G5EC91_CAEEL]	346.33	22.36	4	9	218.233	22.36	4	6	288.496	26.42	5	8	0.78
O62106	eif-6	Eukaryotic translation initiation factor 6 OS=Caenorhabditis elegans GN=eif-6 PE=3 SV=1 - [IF6_CAEEL]	299.761	17.89	4	7	237.72	17.89	3	6	349.06	17.89	3	7	0.78
Q9U2S6	cyn-13	Peptidyl-prolyl cis-trans isomerase E OS=Caenorhabditis elegans GN=cyn-13 PE=1 SV=1 - [Q9U2S6_CAEEL]	199.943	16.62	5	7	169.503	23.56	6	6	179.773	26.28	5	7	0.78
P45971	ostb-1	Dolichyl-diphosphooligosaccharide--protein glycosyltransferase 48 kDa subunit OS=Caenorhabditis elegans GN=ostb-1 PE=3 SV=1 - [OST48_CAEEL]	191.423	13.03	4	6	267.356	15.51	5	7	348.013	25.39	7	7	0.77
O45865	ant-1.1	Adenine Nucleotide Translocator OS=Caenorhabditis elegans GN=ant-1.1 PE=1 SV=1 - [O45865_CAEEL]	3912.75	63.67	30	139	3026.81	60.67	27	118	4429.38	70.33	31	142	0.77
Q94300	rpl-11.1	60S ribosomal protein L11 OS=Caenorhabditis elegans GN=rpl-11.1 PE=3 SV=1 - [RL11_CAEEL]	671.719	31.63	8	32	551.547	27.04	5	25	730.703	60.2	11	31	0.77
O18650	rps-19	40S ribosomal protein S19 OS=Caenorhabditis elegans GN=rps-19 PE=2 SV=1 - [RS19_CAEEL]	725.164	64.38	12	28	412.954	43.84	8	17	695.237	63.7	10	24	0.77
Q22099	krs-1	Lysine--tRNA ligase OS=Caenorhabditis elegans GN=krs-1 PE=3 SV=1 - [SYK_CAEEL]	386.052	19.41	11	20	393.561	18.71	10	17	419.076	20.1	11	20	0.77
Q21966	asp-4	ASpartyl Protease OS=Caenorhabditis elegans GN=asp-4 PE=1 SV=1 - [Q21966_CAEEL]	623.304	21.85	9	18	434.213	20.27	7	12	635.075	28.38	9	16	0.77
Q17348	snr-1	Small nuclear ribonucleoprotein Sm D3 OS=Caenorhabditis elegans GN=snr-1 PE=2 SV=2 - [SMD3_CAEEL]	351.862	29.41	3	14	319.213	29.41	3	12	387.536	29.41	3	14	0.77
G5EFY6	sec-31	Yeast SEC homolog OS=Caenorhabditis elegans GN=sec-31 PE=1 SV=1 - [G5EFY6_CAEEL]	170.537	7.39	7	7	54.2367	3.42	3	3	169.03	7.02	5	5	0.77
Q21154	moma-1	Uncharacterized protein OS=Caenorhabditis elegans GN=moma-1 PE=1 SV=1 - [Q21154_CAEEL]	105.84	15.92	2	5	83.1367	12.94	2	3	122.84	23.38	3	4	0.77
Q93540	CELE_F20D1.9	Uncharacterized protein OS=Caenorhabditis elegans GN=CELE_F20D1.9 PE=1 SV=2 - [Q93540_CAEEL]	119.53	13.74	4	5	76.16	7.67	2	3	133.01	12.14	2	4	0.77
Q09537	grk-1	G protein-coupled receptor kinase 1 OS=Caenorhabditis elegans GN=grk-1 PE=3 SV=1 - [GRK1_CAEEL]	71.94	6.07	3	3	45.0033	4.36	2	3	91.6867	4.36	2	3	0.77
P34460	eef-1B.1	Probable elongation factor 1-beta/1-delta 1 OS=Caenorhabditis elegans GN=eef-1B.1 PE=1 SV=1 - [EF1B1_CAEEL]	132.373	22.07	3	3	102.317	22.07	3	3	69.4533	25.82	3	3	0.77
P34693	snt-1	Synaptotagmin-1 OS=Caenorhabditis elegans GN=snt-1 PE=2 SV=1 - [SYT1_CAEEL]	89.32	7.48	3	3	109.477	7.48	3	3	65.62	7.48	3	3	0.77
Q11117	lmp-1	LAMP family protein lmp-1 OS=Caenorhabditis elegans GN=lmp-1 PE=2 SV=1 - [LMP1_CAEEL]	148.043	16.03	3	3	79.0067	8.86	2	3	135.72	16.03	3	3	0.77
Q9NAQ2	CELE_JC8.2	Uncharacterized protein OS=Caenorhabditis elegans GN=CELE_JC8.2 PE=1 SV=2 - [Q9NAQ2_CAEEL]	77.67	5.35	2	3	97.1033	5.35	2	3	86.19	5.35	2	3	0.77
Q93641	sac-1	SAC1 PIP phosphatase (Yeast Suppressor of ACtin) homolog OS=Caenorhabditis elegans GN=sac-1 PE=1 SV=1 - [Q93641_CAEEL]	93.1933	5.58	3	3	73.87	6.6	3	3	79.7767	6.6	3	3	0.77
Q7YTL5	CELE_K11D2.5	Uncharacterized protein OS=Caenorhabditis elegans GN=CELE_K11D2.5 PE=4 SV=2 - [Q7YTL5_CAEEL]	99.66	7.47	2	3	110.48	7.47	2	3	85.7733	6.32	2	3	0.77
G5ECV9	alh-3	10-formyltetrahydrofolate dehydrogenase OS=Caenorhabditis elegans GN=alh-3 PE=1 SV=1 - [G5ECV9_CAEEL]	67.69	7.16	5	6	83.83	7.38	4	4	148.24	8.59	5	5	0.76
G5EBR1	gdi-1	GDI (RabGDP Dissociation Inhibitor) family OS=Caenorhabditis elegans GN=gdi-1 PE=1 SV=1 - [G5EBR1_CAEEL]	136	12.39	4	6	124.75	4.28	1	4	199.05	10.59	3	5	0.76
Q18817	ben-1	Uncharacterized protein OS=Caenorhabditis elegans GN=ben-1 PE=1 SV=3 - [Q18817_CAEEL]	5999.03	45.5	21	184	5844.35	53.38	25	179	6798.2	52.03	23	199	0.76
P34690	tba-2	Tubulin alpha-2 chain OS=Caenorhabditis elegans GN=tba-2 PE=2 SV=1 - [TBA2_CAEEL]	2938.98	57.37	23	98	2895.59	53.13	25	109	3705.33	64.51	30	114	0.76
O44991	lpd-6	LiPid Depleted OS=Caenorhabditis elegans GN=lpd-6 PE=1 SV=2 - [O44991_CAEEL]	3252.92	42.76	31	107	2766.68	39.27	28	91	3603.21	43.46	30	108	0.76
Q03577	drs-1	Aspartate--tRNA ligase, cytoplasmic OS=Caenorhabditis elegans GN=drs-1 PE=3 SV=1 - [SYDC_CAEEL]	1424.54	43.31	22	58	1692.86	50.28	27	69	2035.32	53.86	27	70	0.76
P27420	hsp-3	Heat shock 70 kDa protein C OS=Caenorhabditis elegans GN=hsp-3 PE=3 SV=2 - [HSP7C_CAEEL]	1109.69	15.28	9	27	1025.71	13.77	9	23	1250.74	17.55	10	27	0.76
Q9U2A9	Y48B6A.1	Ribosome biogenesis protein BOP1 homolog OS=Caenorhabditis elegans GN=Y48B6A.1 PE=3 SV=1 - [BOP1_CAEEL]	775.233	26.41	14	27	580.833	28.64	14	23	720.388	23.59	14	27	0.76
Q19020	dhc-1	Dynein heavy chain, cytoplasmic OS=Caenorhabditis elegans GN=dhc-1 PE=1 SV=1 - [DYHC_CAEEL]	591.186	6.17	27	33	188.718	2.52	12	15	394.747	3.66	18	25	0.76
Q22961	CELE_F25B4.5	Uncharacterized protein OS=Caenorhabditis elegans GN=CELE_F25B4.5 PE=1 SV=2 - [Q22961_CAEEL]	373.559	11.69	7	14	273.06	10.56	6	9	281.83	15.21	8	12	0.76
O45622	erfa-3	Eukaryotic Release FActor homolog OS=Caenorhabditis elegans GN=erfa-3 PE=1 SV=2 - [O45622_CAEEL]	124.263	9.96	4	6	289.762	14.66	7	12	288.248	20.86	8	10	0.76
Q8WQF1	pccb-1	Propionyl Coenzyme A Carboxylase Beta subunit OS=Caenorhabditis elegans GN=pccb-1 PE=1 SV=1 - [Q8WQF1_CAEEL]	203.673	12.26	5	7	126.495	17.82	7	8	272.998	17.62	7	8	0.76
O01513	C48B6.2	Putative 40S ribosomal protein S4-like OS=Caenorhabditis elegans GN=C48B6.2 PE=3 SV=1 - [YS4L_CAEEL]	160.333	42.08	7	8	91.74	18.58	3	4	122.82	30.6	5	6	0.76
Q09584	rnp-7	RNP (RRM RNA binding domain) containing OS=Caenorhabditis elegans GN=rnp-7 PE=1 SV=2 - [Q09584_CAEEL]	185.361	29.22	7	8	96.82	18.37	4	4	147.96	23.19	5	6	0.76
Q9U329	CELE_W09C5.8	Uncharacterized protein OS=Caenorhabditis elegans GN=CELE_W09C5.8 PE=1 SV=1 - [Q9U329_CAEEL]	197.375	21.14	5	8	106.6	20.57	4	4	144.907	20.57	5	6	0.76
Q8ITY9	CELE_R148.5	Uncharacterized protein OS=Caenorhabditis elegans GN=CELE_R148.5 PE=1 SV=1 - [Q8ITY9_CAEEL]	42.09	1.98	1	1	39.62	4.55	2	3	42.1178	4.55	2	2	0.76
Q9TYZ4	CELE_H35B03.1	Uncharacterized protein OS=Caenorhabditis elegans GN=CELE_H35B03.1 PE=1 SV=2 - [Q9TYZ4_CAEEL]	64.45	2.94	1	1	101.903	7.24	3	3	55.04	6.11	2	2	0.76
Q10901	glt-1	Excitatory amino acid transporter OS=Caenorhabditis elegans GN=glt-1 PE=1 SV=2 - [EAA1_CAEEL]	79.25	2.58	1	1	168.593	2.58	1	3	154.7	2.58	1	2	0.76
Q18930	aka-1	A Kinase Anchor protein OS=Caenorhabditis elegans GN=aka-1 PE=1 SV=1 - [Q18930_CAEEL]	38.8	1.09	1	1	49.1567	2.66	3	3	41.32	2.27	2	2	0.76
Q8MXT1	prdx-6	PeRoxireDoXin OS=Caenorhabditis elegans GN=prdx-6 PE=1 SV=1 - [Q8MXT1_CAEEL]	35.66	3.9	1	1	53.3733	17.75	3	3	34.15	6.93	2	2	0.76
Q9XU13	sca-1	Calcium-transporting ATPase OS=Caenorhabditis elegans GN=sca-1 PE=1 SV=1 - [Q9XU13_CAEEL]	2064.4	26.29	24	67	2041.63	27.89	25	63	2445.14	33.17	31	70	0.75
Q966C6	rpl-7A	60S ribosomal protein L7a OS=Caenorhabditis elegans GN=rpl-7A PE=1 SV=3 - [RL7A_CAEEL]	1533.75	46.42	22	64	1054.41	46.04	17	41	1445.81	46.79	22	55	0.75
P34334	rpl-21	60S ribosomal protein L21 OS=Caenorhabditis elegans GN=rpl-21 PE=1 SV=3 - [RL21_CAEEL]	843.166	54.04	13	31	620.103	49.69	11	24	793.075	54.04	13	29	0.75
G5EG85	unc-70	Beta-G spectrin OS=Caenorhabditis elegans GN=unc-70 PE=1 SV=1 - [G5EG85_CAEEL]	695.833	13.42	23	31	685.15	8.29	15	22	715.944	11.56	22	28	0.75
Q22054	rps-16	40S ribosomal protein S16 OS=Caenorhabditis elegans GN=rps-16 PE=1 SV=3 - [RS16_CAEEL]	508.198	63.19	14	25	407.438	61.81	12	17	403.981	54.86	12	22	0.75
P46563	aldo-2	Fructose-bisphosphate aldolase 2 OS=Caenorhabditis elegans GN=aldo-2 PE=2 SV=1 - [ALF2_CAEEL]	524.516	47.27	15	20	560.021	38.8	12	16	604.997	49.18	13	19	0.75
P34662	rpl-35	60S ribosomal protein L35 OS=Caenorhabditis elegans GN=rpl-35 PE=3 SV=1 - [RL35_CAEEL]	337.689	36.59	8	16	441.258	36.59	9	19	487.89	36.59	9	19	0.75
V6CKR1	icd-2	Inhibitor of Cell Death OS=Caenorhabditis elegans GN=icd-2 PE=1 SV=1 - [V6CKR1_CAEEL]	705.464	55.56	7	19	650.49	54.44	6	15	718.494	55.56	8	18	0.75
O01755	apm-1	AdaPtin, Mu/medium chain (Clathrin associated complex) OS=Caenorhabditis elegans GN=apm-1 PE=1 SV=2 - [O01755_CAEEL]	297.51	20.42	6	9	194.76	9.86	3	5	193.482	17.37	5	7	0.75
O62518	ZK795.3	Brix domain-containing protein ZK795.3 OS=Caenorhabditis elegans GN=ZK795.3 PE=3 SV=1 - [YHPK_CAEEL]	470.67	26.37	6	9	242.48	18.15	4	5	330.94	28.42	6	7	0.75
U4PBX2	rnp-3	RNP (RRM RNA binding domain) containing OS=Caenorhabditis elegans GN=rnp-3 PE=1 SV=1 - [U4PBX2_CAEEL]	258.394	31.38	5	7	194.719	25	4	5	139.693	31.91	5	6	0.75
Q19584	ufd-1	Ubiquitin fusion degradation protein 1 homolog OS=Caenorhabditis elegans GN=ufd-1 PE=3 SV=1 - [UFD1_CAEEL]	104.106	15.2	4	4	69.4702	14.04	4	4	195.031	19.3	4	4	0.75
Q94050	sna-2	Small Nuclear RNA (SnRNA) Associated protein OS=Caenorhabditis elegans GN=sna-2 PE=1 SV=1 - [Q94050_CAEEL]	101.42	2.56	2	4	111.88	1.36	1	4	109.51	2.56	2	4	0.75
Q93535	CELE_F20D1.3	Uncharacterized protein OS=Caenorhabditis elegans GN=CELE_F20D1.3 PE=1 SV=2 - [Q93535_CAEEL]	184.85	10.15	3	4	139.65	10.37	3	4	127.98	15.33	4	4	0.75
P34574	chc-1	Probable clathrin heavy chain 1 OS=Caenorhabditis elegans GN=chc-1 PE=3 SV=1 - [CLH_CAEEL]	3033.05	30.22	44	121	1992.7	30.22	43	81	2700.01	33.79	46	106	0.74
P09446	hsp-1	Heat shock 70 kDa protein A OS=Caenorhabditis elegans GN=hsp-1 PE=1 SV=2 - [HSP7A_CAEEL]	2748.66	43.59	25	85	3079.08	38.28	24	90	3542.55	42.97	25	94	0.74
P48154	rps-1	40S ribosomal protein S3a OS=Caenorhabditis elegans GN=rps-1 PE=3 SV=2 - [RS3A_CAEEL]	1604.02	50.97	21	58	1609.92	59.92	25	55	1632.84	68.87	27	60	0.74
Q17343	unc-44	AO13 ankyrin OS=Caenorhabditis elegans GN=unc-44 PE=4 SV=2 - [Q17343_CAEEL]	1414.73	4.49	26	48	1760.47	5.6	30	60	1761.41	6.09	33	58	0.74
Q95XP6	mca-3	Calcium-transporting ATPase OS=Caenorhabditis elegans GN=mca-3 PE=1 SV=1 - [Q95XP6_CAEEL]	477.48	17.84	18	23	576.354	19.66	20	24	596.605	20.43	20	25	0.74
Q27389	rpl-16	60S ribosomal protein L13a OS=Caenorhabditis elegans GN=rpl-16 PE=2 SV=1 - [RL13A_CAEEL]	611.755	46.04	13	26	540.23	44.06	10	20	636.748	44.55	11	24	0.74
G5EFG4	abcf-2	ABC transporter, class F OS=Caenorhabditis elegans GN=abcf-2 PE=1 SV=1 - [G5EFG4_CAEEL]	580.208	22.35	16	26	406.288	20.74	16	20	547.703	21.06	16	24	0.74
Q18066	dim-1	Disorganized muscle protein 1 OS=Caenorhabditis elegans GN=dim-1 PE=1 SV=3 - [DIM_CAEEL]	624.273	23.28	12	17	726.2	21.88	13	22	722.925	27.97	13	21	0.74
Q8T8N7	CELE_T08B2.5	Uncharacterized protein OS=Caenorhabditis elegans GN=CELE_T08B2.5 PE=1 SV=1 - [Q8T8N7_CAEEL]	268.685	7.74	5	12	566.263	12.7	8	21	605.308	12.7	8	18	0.74
P49181	rpl-36	60S ribosomal protein L36 OS=Caenorhabditis elegans GN=rpl-36 PE=1 SV=3 - [RL36_CAEEL]	372.843	45.19	10	18	197.167	39.42	6	8	296.218	40.38	9	13	0.74
Q86B39	alg-2	Protein argonaute OS=Caenorhabditis elegans GN=alg-2 PE=1 SV=1 - [Q86B39_CAEEL]	349.559	12.35	8	17	212.41	10.77	7	9	410.414	9.32	6	13	0.74
K7ZUH9	his-40	Histone H3 OS=Caenorhabditis elegans GN=his-40 PE=1 SV=1 - [K7ZUH9_CAEEL]	135.566	20.59	5	11	118.795	19.85	4	7	174.267	37.5	4	9	0.74
Q22036	tra-3	Calpain-5 OS=Caenorhabditis elegans GN=tra-3 PE=1 SV=1 - [CAN5_CAEEL]	156.03	12.65	7	10	68.5139	8.95	5	6	105.23	9.1	6	8	0.74
P51875	goa-1	Guanine nucleotide-binding protein G(o) subunit alpha OS=Caenorhabditis elegans GN=goa-1 PE=1 SV=3 - [GNAO_CAEEL]	168.605	18.08	6	8	189.42	19.21	5	6	169.311	18.64	6	7	0.74
Q95PZ1	CELE_Y67H2A.5	Uncharacterized protein OS=Caenorhabditis elegans GN=CELE_Y67H2A.5 PE=1 SV=1 - [Q95PZ1_CAEEL]	284.735	31.03	3	8	183.139	31.72	4	6	223.617	31.72	4	7	0.74
O44782	vpr-1	Major sperm protein OS=Caenorhabditis elegans GN=vpr-1 PE=1 SV=1 - [O44782_CAEEL]	172.33	23.27	4	5	191.3	23.27	4	5	159.7	16.33	3	5	0.74
P91430	uba-5	Ubiquitin-like modifier-activating enzyme 5 OS=Caenorhabditis elegans GN=uba-5 PE=1 SV=1 - [UBA5_CAEEL]	39.02	2.86	1	2	120.09	8.11	3	4	65.9167	5.01	2	3	0.74
Q8I7G8	CELE_F26B1.2	Uncharacterized protein OS=Caenorhabditis elegans GN=CELE_F26B1.2 PE=1 SV=1 - [Q8I7G8_CAEEL]	68.5	3.42	1	2	85.88	9.21	3	4	49.7733	9.74	3	3	0.74
P91303	vha-10	Probable V-type proton ATPase subunit G OS=Caenorhabditis elegans GN=vha-10 PE=3 SV=1 - [VATG_CAEEL]	140.58	21.43	3	4	169.203	20.63	3	6	213.4	29.37	3	5	0.73
P90783	pafo-1	RNA polymerase II-associated factor 1 homolog OS=Caenorhabditis elegans GN=pafo-1 PE=2 SV=2 - [PAF1_CAEEL]	106.72	12	5	6	41.86	2.59	1	1	80.9167	7.29	3	3	0.73
Q7JQD2	#VALUE!	Elongation factor Tu homologue (Fragment) OS=Caenorhabditis elegans PE=2 SV=1 - [Q7JQD2_CAEEL]	2299.11	48.69	30	91	2050.24	46.87	30	83	2666.35	64.85	33	91	0.73
H2L2J6	pqn-27	Prion-like-(Q/N-rich)-domain-bearing protein OS=Caenorhabditis elegans GN=pqn-27 PE=1 SV=1 - [H2L2J6_CAEEL]	303.425	17.96	5	8	509.054	24.13	9	18	384.859	28.42	10	14	0.73
G5EGB3	ragc-1	RAs-related GTP binding protein C homolog OS=Caenorhabditis elegans GN=ragc-1 PE=1 SV=1 - [G5EGB3_CAEEL]	362.967	25.15	8	14	307.625	18.05	6	10	326.87	22.49	7	12	0.73
Q19324	rpn-5	Proteasome Regulatory Particle, Non-ATPase-like OS=Caenorhabditis elegans GN=rpn-5 PE=1 SV=1 - [Q19324_CAEEL]	217.127	17.96	9	11	144.59	14.9	8	9	239.648	19.8	9	10	0.73
O62246	cope-1	Coatomer subunit epsilon OS=Caenorhabditis elegans GN=cope-1 PE=3 SV=1 - [COPE_CAEEL]	316.456	43.15	8	9	262.403	33.9	5	7	301.905	35.27	6	8	0.73
G5EET8	pud-1.2	Protein Up-regulated in Daf-2(Gf) OS=Caenorhabditis elegans GN=pud-1.2 PE=1 SV=1 - [G5EET8_CAEEL]	364.743	58.28	5	12	125.917	25.17	2	3	236.353	42.38	4	7	0.73
O45106	ech-5	Enoyl-CoA Hydratase OS=Caenorhabditis elegans GN=ech-5 PE=1 SV=3 - [O45106_CAEEL]	150.09	24.39	5	7	118.144	22.3	4	7	135.101	25.09	6	7	0.73
P91350	npp-6	Nuclear Pore complex Protein OS=Caenorhabditis elegans GN=npp-6 PE=1 SV=1 - [P91350_CAEEL]	48.7	1.28	2	3	110.49	2.56	4	5	115.323	1.66	3	4	0.73
Q9BL34	CELE_Y71H2AM.5	Uncharacterized protein OS=Caenorhabditis elegans GN=CELE_Y71H2AM.5 PE=1 SV=1 - [Q9BL34_CAEEL]	72.5633	19.83	2	3	99.1682	28.1	3	5	84.6166	19.83	2	4	0.73
O45218	ads-1	Alkyldihydroxyacetonephosphate synthase OS=Caenorhabditis elegans GN=ads-1 PE=2 SV=1 - [ADAS_CAEEL]	82.0833	5.36	3	3	114.91	9.05	5	5	99.46	7.71	4	4	0.73
X5M8Y9	npp-13	Nuclear Pore complex Protein OS=Caenorhabditis elegans GN=npp-13 PE=1 SV=1 - [X5M8Y9_CAEEL]	50.6022	4.58	3	3	143.36	6.11	3	5	100.48	7.33	4	4	0.73
Q7Z1P8	CELE_R11G1.6	Uncharacterized protein OS=Caenorhabditis elegans GN=CELE_R11G1.6 PE=1 SV=1 - [Q7Z1P8_CAEEL]	67.3433	4.33	3	3					43.79	1.24	1	1	0.73
G5EEK9	vha-5	V-type proton ATPase subunit a OS=Caenorhabditis elegans GN=vha-5 PE=1 SV=1 - [G5EEK9_CAEEL]	77.07	3.78	3	3					33.67	1.15	1	1	0.73
Q09347	T05H10.3	Uncharacterized protein T05H10.3 OS=Caenorhabditis elegans GN=T05H10.3 PE=1 SV=1 - [YRS3_CAEEL]	80.3433	15.19	2	3					42.9	8.86	1	1	0.73
A0A9S2	CELE_Y38F2AR.12	Uncharacterized protein OS=Caenorhabditis elegans GN=CELE_Y38F2AR.12 PE=1 SV=2 - [A0A9S2_CAEEL]	39.273	1.83	3	3					28.61	0.56	1	1	0.73
Q23614	CELE_ZK822.2	Uncharacterized protein OS=Caenorhabditis elegans GN=CELE_ZK822.2 PE=1 SV=2 - [Q23614_CAEEL]	83.06	13.1	2	3					41.85	4.76	1	1	0.73
B7FAS5	tbc-17	TBC (Tre-2/Bub2/Cdc16) domain family OS=Caenorhabditis elegans GN=tbc-17 PE=1 SV=1 - [B7FAS5_CAEEL]	20.23	2.45	2	2	81.0022	5.92	5	6	59.1	4.12	4	4	0.72
Q9N3Y1	CELE_Y42H9AR.1	Uncharacterized protein OS=Caenorhabditis elegans GN=CELE_Y42H9AR.1 PE=1 SV=1 - [Q9N3Y1_CAEEL]	78.79	4.94	2	2	184.053	10.87	5	6	122.04	7.91	3	4	0.72
P41937	tbb-4	Tubulin beta-4 chain OS=Caenorhabditis elegans GN=tbb-4 PE=3 SV=1 - [TBB4_CAEEL]	4899.44	36.94	17	142	4680.26	38.06	20	148	5361.12	32.88	17	152	0.72
Q22135	CELE_T04A8.6	Uncharacterized protein OS=Caenorhabditis elegans GN=CELE_T04A8.6 PE=1 SV=1 - [Q22135_CAEEL]	1519.38	50.16	15	46	589.866	45.28	12	23	1217.29	45.6	13	34	0.72
O45552	acaa-2	ACetyl-CoA Acyltransferase 2 homolog OS=Caenorhabditis elegans GN=acaa-2 PE=1 SV=2 - [O45552_CAEEL]	1260.2	58.12	17	36	785.29	47.72	12	20	1275.67	71.57	17	28	0.72
Q19126	asb-2	ATP Synthase B homolog OS=Caenorhabditis elegans GN=asb-2 PE=1 SV=1 - [Q19126_CAEEL]	836.01	39.67	15	30	502.595	40.66	13	18	667.447	54.1	16	24	0.72
Q27511	htz-1	Histone H2A.V OS=Caenorhabditis elegans GN=htz-1 PE=2 SV=3 - [H2AV_CAEEL]	488.755	40.71	6	18	303.336	28.57	4	12	387.199	40.71	6	15	0.72
Q20049	idhg-1	Isocitrate dehydrogenase [NAD] subunit, mitochondrial OS=Caenorhabditis elegans GN=idhg-1 PE=1 SV=2 - [Q20049_CAEEL]	241.197	30.05	9	16	243.567	25	7	12	371.753	32.07	8	14	0.72
O16266	CELE_F40A3.6	Uncharacterized protein OS=Caenorhabditis elegans GN=CELE_F40A3.6 PE=1 SV=1 - [O16266_CAEEL]	343.806	56.98	11	14	77.88	25.58	4	5	198.379	40.31	7	9	0.72
Q9U1V9	dnj-29	DNaJ domain (Prokaryotic heat shock protein) OS=Caenorhabditis elegans GN=dnj-29 PE=1 SV=1 - [Q9U1V9_CAEEL]	191.156	8.91	6	8	138.727	5.59	3	3	117.7	7.45	5	5	0.72
P34556	cdk-1	Cyclin-dependent kinase 1 OS=Caenorhabditis elegans GN=cdk-1 PE=1 SV=1 - [CDK1_CAEEL]	100.41	12.95	3	4	0	2.41	1	1	41.68	6.93	2	2	0.72
Q9N4I0	arx-1	Actin-related protein 3 OS=Caenorhabditis elegans GN=arx-1 PE=3 SV=1 - [ARP3_CAEEL]	111.5	18.35	4	4	24.46	3.76	1	1	61.67	8.71	2	2	0.72
G5ECH7	cdk-5	Cyclin-dependent-like kinase 5 OS=Caenorhabditis elegans GN=cdk-5 PE=1 SV=1 - [CDK5_CAEEL]	39.28	9.25	3	4	0	2.74	1	1	25.6	5.48	2	2	0.72
O44509	CELE_F42G8.10	Uncharacterized protein OS=Caenorhabditis elegans GN=CELE_F42G8.10 PE=1 SV=1 - [O44509_CAEEL]	118.04	18.23	3	4	37.78	7.18	1	1	43.11	15.47	2	2	0.72
Q4ZG90	lsy-2	Uncharacterized protein OS=Caenorhabditis elegans GN=lsy-2 PE=1 SV=1 - [Q4ZG90_CAEEL]	60.0167	6.78	2	4	46.31	2.65	1	1	0	2.65	1	2	0.72
Q27GQ5	CELE_F49C12.7	Uncharacterized protein OS=Caenorhabditis elegans GN=CELE_F49C12.7 PE=1 SV=1 - [Q27GQ5_CAEEL]	175.05	17.87	4	6	92.8833	4.11	1	3	123.46	7.73	2	4	0.71
Q21752	vdac-1	Probable voltage-dependent anion-selective channel OS=Caenorhabditis elegans GN=vdac-1 PE=3 SV=2 - [VDAC_CAEEL]	1422.95	74.91	22	44	1431.14	80.57	23	41	1556.26	80.57	23	43	0.71
Q9XUS4	CELE_K08E3.5	Uncharacterized protein OS=Caenorhabditis elegans GN=CELE_K08E3.5 PE=1 SV=1 - [Q9XUS4_CAEEL]	1113.27	37.77	18	41	920.812	39.73	21	43	1214.06	38.55	19	43	0.71
O76360	egl-4	cGMP-dependent protein kinase egl-4 OS=Caenorhabditis elegans GN=egl-4 PE=1 SV=2 - [EGL4_CAEEL]	616.293	26.67	19	31	632.637	25.64	19	23	740.545	28.72	22	27	0.71
O44411	nog-1	Nucleolar GTP-binding protein 1 OS=Caenorhabditis elegans GN=nog-1 PE=1 SV=1 - [NOG1_CAEEL]	582.059	24.38	17	31	290.094	15.42	11	18	527.764	23.05	14	24	0.71
Q9U1Q7	emb-4	Uncharacterized protein OS=Caenorhabditis elegans GN=emb-4 PE=1 SV=4 - [Q9U1Q7_CAEEL]	709.382	11.93	17	32	171.641	6.41	9	10	367.05	7.29	11	20	0.71
G5EFV4	hmg-1.1	HMG OS=Caenorhabditis elegans GN=hmg-1.1 PE=1 SV=1 - [G5EFV4_CAEEL]	402.222	52.63	8	18	361.33	52.63	8	18	380.269	52.63	8	18	0.71
Q10578	rpb-2	DNA-directed RNA polymerase II subunit RPB2 OS=Caenorhabditis elegans GN=rpb-2 PE=2 SV=2 - [RPB2_CAEEL]	274.822	12.49	11	15	345.564	10.98	11	15	391.069	10.81	10	15	0.71
G5EEW6	sig-7	Uncharacterized protein OS=Caenorhabditis elegans GN=sig-7 PE=1 SV=1 - [G5EEW6_CAEEL]	345.62	22.48	7	12	373.463	26.23	8	12	416.99	32.32	10	12	0.71
Q09545	sdhb-1	Succinate dehydrogenase [ubiquinone] iron-sulfur subunit, mitochondrial OS=Caenorhabditis elegans GN=sdhb-1 PE=2 SV=1 - [SDHB_CAEEL]	131.929	16.78	5	8	153.901	25.17	7	10	116.013	30.87	9	9	0.71
Q03206	ced-10	Ras-related protein ced-10 OS=Caenorhabditis elegans GN=ced-10 PE=1 SV=2 - [RAC1_CAEEL]	75.99	17.8	4	5	70.4	7.85	1	2	101.09	19.9	3	3	0.71
Q17740	ain-1	ALG-1 INteracting protein OS=Caenorhabditis elegans GN=ain-1 PE=1 SV=4 - [Q17740_CAEEL]	128.79	7.96	4	5	64.41	4.37	2	2	98.55	3.59	2	3	0.71
S6EZK7	CELE_F11C1.5	Uncharacterized protein OS=Caenorhabditis elegans GN=CELE_F11C1.5 PE=1 SV=1 - [S6EZK7_CAEEL]	99.81	5.75	5	5	71.9155	2.46	2	2	102.801	3.49	3	3	0.71
Q71JP9	Y74C10AM.1	ABC7 protein OS=Caenorhabditis elegans GN=Y74C10AM.1 PE=2 SV=1 - [Q71JP9_CAEEL]	84.1633	5.69	4	5	34.48	2.56	2	2	50.09	4.27	3	3	0.71
O02089	msra-1	Methionine Sulfoxide Reductase A OS=Caenorhabditis elegans GN=msra-1 PE=1 SV=1 - [O02089_CAEEL]	42.34	7.73	1	1	163.717	33.82	5	7	197.04	17.87	2	4	0.7
Q18212	hel-1	Spliceosome RNA helicase DDX39B homolog OS=Caenorhabditis elegans GN=hel-1 PE=2 SV=1 - [DX39B_CAEEL]	450.817	26.35	10	16	614.149	28	12	25	579.6	37.88	14	21	0.7
O45757	CELE_T06E6.1	Uncharacterized protein OS=Caenorhabditis elegans GN=CELE_T06E6.1 PE=1 SV=1 - [O45757_CAEEL]	817.96	34.11	11	27	332.385	19.49	7	11	535.704	21.58	7	18	0.7
Q20748	atad-3	ATPase family AAA domain-containing protein 3 OS=Caenorhabditis elegans GN=atad-3 PE=3 SV=2 - [ATAD3_CAEEL]	372.585	15.46	7	15	257.251	9.75	5	10	373.26	14.79	8	12	0.7
P91374	rpl-15	60S ribosomal protein L15 OS=Caenorhabditis elegans GN=rpl-15 PE=3 SV=1 - [RL15_CAEEL]	379.873	37.25	10	20	128.307	20.59	5	6	279.719	20.59	6	12	0.7
Q09511	rsp-4	Probable splicing factor, arginine/serine-rich 4 OS=Caenorhabditis elegans GN=rsp-4 PE=3 SV=1 - [RSP4_CAEEL]	284.745	19.39	5	8	163.92	19.39	3	5	159.837	19.39	3	6	0.7
Q8WQB3	apg-1	AdaPtin, Gamma chain (Clathrin associated complex) OS=Caenorhabditis elegans GN=apg-1 PE=1 SV=1 - [Q8WQB3_CAEEL]	88.4868	8.44	7	7	84.3391	5.07	4	4	108.848	6.63	5	5	0.7
P17343	gpb-1	Guanine nucleotide-binding protein subunit beta-1 OS=Caenorhabditis elegans GN=gpb-1 PE=1 SV=2 - [GBB1_CAEEL]	270.457	11.18	4	6	210.97	14.41	5	5	233.26	11.18	4	5	0.69
H2KZS4	CELE_T23E7.2	Uncharacterized protein OS=Caenorhabditis elegans GN=CELE_T23E7.2 PE=1 SV=2 - [H2KZS4_CAEEL]	129.823	28.03	4	6	113.944	28.03	5	5	106.25	23.48	4	5	0.69
P12845	myo-2	Myosin-2 OS=Caenorhabditis elegans GN=myo-2 PE=1 SV=2 - [MYO2_CAEEL]	4212.57	19.36	38	147	3244.14	19.88	40	112	4398.73	21.42	38	128	0.69
Q95XJ0	CELE_Y69A2AR.18	Uncharacterized protein OS=Caenorhabditis elegans GN=CELE_Y69A2AR.18 PE=1 SV=1 - [Q95XJ0_CAEEL]	1501.79	37.12	15	40	1970.06	56.52	20	53	2042.38	51.84	17	47	0.69
O45734	cpl-1	CathePsin L family OS=Caenorhabditis elegans GN=cpl-1 PE=1 SV=1 - [O45734_CAEEL]	860.438	24.93	9	20	790.855	23.74	8	17	753.965	36.5	12	18	0.69
Q9N5T0	CELE_F45D11.1	Uncharacterized protein OS=Caenorhabditis elegans GN=CELE_F45D11.1 PE=4 SV=3 - [Q9N5T0_CAEEL]	395.726	24.21	5	17	252.547	24.21	5	14	310.196	24.21	5	15	0.69
Q9U238	trap-4	TRanslocon-Associated Protein OS=Caenorhabditis elegans GN=trap-4 PE=1 SV=1 - [Q9U238_CAEEL]	546.775	57.23	6	13	487.213	50.31	5	12	494.63	57.23	6	12	0.69
O76833	mca-2	Calcium-transporting ATPase OS=Caenorhabditis elegans GN=mca-2 PE=2 SV=1 - [O76833_CAEEL]	262.54	8.38	8	9	223.661	5.18	6	8	199.447	6.3	6	8	0.69
Q19007	nap-1	Nucleosome Assembly Protein OS=Caenorhabditis elegans GN=nap-1 PE=1 SV=1 - [Q19007_CAEEL]	346.835	33.23	8	14	86.36	14.24	3	4	234.8	33.86	5	8	0.69
A0A061AD41	B0513.5	Uncharacterized protein OS=Caenorhabditis elegans GN=B0513.5 PE=1 SV=1 - [A0A061AD41_CAEEL]	130.57	12.62	5	5	138.36	10.49	4	4	98.41	10.68	4	4	0.69
P90921	asg-1	Probable ATP synthase subunit g 1, mitochondrial OS=Caenorhabditis elegans GN=asg-1 PE=3 SV=1 - [ATPL1_CAEEL]	101.57	26.72	3	4	96.8867	16.03	2	3	82.37	16.03	2	3	0.69
Q9N4B1	clp-7	CaLPain family OS=Caenorhabditis elegans GN=clp-7 PE=1 SV=2 - [Q9N4B1_CAEEL]	126.81	6.56	4	4	65.4533	4.76	3	3	112.14	4.37	3	3	0.69
Q9TYV3	CELE_W07E6.2	Uncharacterized protein OS=Caenorhabditis elegans GN=CELE_W07E6.2 PE=1 SV=1 - [Q9TYV3_CAEEL]	76.88	10.57	4	4	69.1133	8.03	3	3	102.193	8.03	3	3	0.69
Q9N531	frm-5.2	FERM domain (Protein4.1-ezrin-radixin-moesin) family OS=Caenorhabditis elegans GN=frm-5.2 PE=4 SV=3 - [Q9N531_CAEEL]	64.8833	1.63	2	3	51.08	1.63	2	2	49.69	1.48	2	2	0.69
G5EBJ7	fbp-1	Fructose-1,6-BiPhosphatase OS=Caenorhabditis elegans GN=fbp-1 PE=1 SV=1 - [G5EBJ7_CAEEL]	87.56	12.9	3	3	107.58	9.38	2	2	83.79	8.21	2	2	0.69
Q9NAG4	mac-1	Member of AAA family binding CED-4 OS=Caenorhabditis elegans GN=mac-1 PE=1 SV=2 - [Q9NAG4_CAEEL]	97.83	4.43	3	3	41.02	2.95	2	2	80.04	2.95	2	2	0.69
Q17512	B0491.5	Uncharacterized protein OS=Caenorhabditis elegans GN=B0491.5 PE=1 SV=1 - [Q17512_CAEEL]	102.407	12.84	3	3	47.54	8.26	2	2	39.71	8.26	2	2	0.69
G5ED21	rpoa-1	DNA-directed RNA polymerase OS=Caenorhabditis elegans GN=rpoa-1 PE=1 SV=1 - [G5ED21_CAEEL]	42.46	0.98	2	3	48.59	0.52	1	2	32.28	0.52	1	2	0.69
Q9N595	elpc-1	Elongator complex protein 1 OS=Caenorhabditis elegans GN=elpc-1 PE=1 SV=2 - [Q9N595_CAEEL]	150.818	2.72	3	3	80.1003	1.6	2	2	74.3547	1.6	2	2	0.69
Q9NAI5	CELE_Y39G8B.1	Uncharacterized protein OS=Caenorhabditis elegans GN=CELE_Y39G8B.1 PE=1 SV=1 - [Q9NAI5_CAEEL]	97.69	7.28	2	3	57.47	7.28	2	2	47.91	9.81	2	2	0.69
Q93879	CELE_K09E9.3	Uncharacterized protein OS=Caenorhabditis elegans GN=CELE_K09E9.3 PE=1 SV=1 - [Q93879_CAEEL]	97.1293	5.49	2	3	29.33	5.7	2	2	49.2295	5.7	2	2	0.69
P30632	asna-1	ATPase asna-1 OS=Caenorhabditis elegans GN=asna-1 PE=1 SV=1 - [ASNA_CAEEL]	36.91	7.6	2	2	27.64	2.92	1	1	21.75	2.05	1	1	0.69
Q9TVL3	cdk-9	Probable cyclin-dependent kinase 9 OS=Caenorhabditis elegans GN=cdk-9 PE=3 SV=2 - [CDK9_CAEEL]	36.0433	4.18	2	2	24.9	1.88	1	1	21.79	1.88	1	1	0.69
O45933	npp-18	Nucleoporin SEH1 OS=Caenorhabditis elegans GN=npp-18 PE=3 SV=1 - [SEH1_CAEEL]	37.18	6.61	2	2	37.66	3.31	1	1	37.94	3.31	1	1	0.69
Q09441	C08B11.3	SWI/SNF nucleosome remodeling complex component OS=Caenorhabditis elegans GN=C08B11.3 PE=3 SV=1 - [SWSN7_CAEEL]	56.28	1.61	2	2	38.3	0.88	1	1	41.01	0.72	1	1	0.69
P34305	rha-2	Putative ATP-dependent RNA helicase rha-2 OS=Caenorhabditis elegans GN=rha-2 PE=3 SV=2 - [RHA2_CAEEL]	54.38	2.44	2	2	51.44	1.05	1	1	57.06	1.05	1	1	0.69
Q22101	CELE_T02G5.7	Uncharacterized protein OS=Caenorhabditis elegans GN=CELE_T02G5.7 PE=1 SV=1 - [Q22101_CAEEL]	37.59	6.15	2	2	29.06	1.79	1	1	23.17	2.56	1	1	0.69
H2L0I9	CELE_T04C4.1	Uncharacterized protein OS=Caenorhabditis elegans GN=CELE_T04C4.1 PE=1 SV=1 - [H2L0I9_CAEEL]	64.16	2.58	2	2	26.24	1.01	1	1	28.14	1.01	1	1	0.69
Q27492	rpc-2	DNA-directed RNA polymerase OS=Caenorhabditis elegans GN=rpc-2 PE=1 SV=2 - [Q27492_CAEEL]	48.75	1.65	2	2	41.94	0.78	1	1	32.6	0.87	1	1	0.69
Q95YC7	C45B2.2	Uncharacterized protein OS=Caenorhabditis elegans GN=C45B2.2 PE=1 SV=1 - [Q95YC7_CAEEL]	32.96	11.11	2	2	34.63	11.11	1	1	45.59	11.11	1	1	0.69
Q9N3Z0	sqst-2	SeQueSTosome related OS=Caenorhabditis elegans GN=sqst-2 PE=1 SV=2 - [Q9N3Z0_CAEEL]	43.63	13.22	2	2	61.69	8.68	1	1	66.69	8.68	1	1	0.69
Q21021	npp-9	Nuclear Pore complex Protein OS=Caenorhabditis elegans GN=npp-9 PE=1 SV=2 - [Q21021_CAEEL]	38.76	3.02	2	2	55.53	1.28	1	1	50.11	1.28	1	1	0.69
O44955	C34B2.8	Uncharacterized protein OS=Caenorhabditis elegans GN=C34B2.8 PE=1 SV=1 - [O44955_CAEEL]	37.34	12.87	2	2	31.8	8.19	1	1	35.31	8.19	1	1	0.69
H2KYH5	C07A12.7	Uncharacterized protein OS=Caenorhabditis elegans GN=C07A12.7 PE=1 SV=1 - [H2KYH5_CAEEL]	40.14	4.96	1	2	21.65	4.96	1	1	87.28	4.96	1	1	0.69
Q21083	mrpl-10	Mitochondrial Ribosomal Protein, Large OS=Caenorhabditis elegans GN=mrpl-10 PE=1 SV=1 - [Q21083_CAEEL]	40.1774	9.21	2	2	26.62	6.69	1	1	79.98	6.69	1	1	0.69
P34476	rpac-19	Probable DNA-directed RNA polymerases I and III subunit RPAC2 OS=Caenorhabditis elegans GN=rpac-19 PE=3 SV=1 - [RPAC2_CAEEL]	67.74	16.67	2	2	43.8	9.03	1	1	40.14	9.03	1	1	0.69
Q9XUJ7	dkf-1	Serine/threonine-protein kinase dkf-1 OS=Caenorhabditis elegans GN=dkf-1 PE=1 SV=1 - [DKF1_CAEEL]	32.63	2.77	2	2	26.8	1.66	1	1	29.35	1.11	1	1	0.69
Q8WTL6	hpo-29	Uncharacterized protein OS=Caenorhabditis elegans GN=hpo-29 PE=1 SV=2 - [Q8WTL6_CAEEL]	48.56	2.23	2	2	27.52	1.41	1	1	30.36	0.82	1	1	0.69
Q17345	ccf-1	CCR4-NOT transcription complex subunit 7 OS=Caenorhabditis elegans GN=ccf-1 PE=2 SV=1 - [CNOT7_CAEEL]	51.57	8.39	2	2	27.96	3.23	1	1	37.09	3.23	1	1	0.69
A8WHU4	CELE_T08G11.4	Uncharacterized protein OS=Caenorhabditis elegans GN=CELE_T08G11.4 PE=1 SV=1 - [A8WHU4_CAEEL]	83.93	5.45	2	2	28.5	2.02	1	1	25.92	2.02	1	1	0.69
Q22453	ssup-72	SSU (Yeast Suppressor of SUa7) Protein homolog OS=Caenorhabditis elegans GN=ssup-72 PE=1 SV=4 - [Q22453_CAEEL]	46.74	12.69	2	2	41.75	5.58	1	1	43.38	5.58	1	1	0.69
Q19416	dylt-1	DYnein Light chain (Tctex type) OS=Caenorhabditis elegans GN=dylt-1 PE=1 SV=2 - [Q19416_CAEEL]	54.27	22.64	2	2	27.54	15.09	1	1	50.9	15.09	1	1	0.69
Q23424	fzo-1	Transmembrane GTPase fzo-1 OS=Caenorhabditis elegans GN=fzo-1 PE=3 SV=1 - [FZO1_CAEEL]	94.71	6.85	5	5	133.188	9.04	6	6	90.09	9.17	5	5	0.68
O62415	lys-1	LYSozyme OS=Caenorhabditis elegans GN=lys-1 PE=1 SV=1 - [O62415_CAEEL]	373.62	18.46	4	8					209.56	11.41	2	3	0.68
P12456	mec-7	Tubulin beta-1 chain OS=Caenorhabditis elegans GN=mec-7 PE=2 SV=1 - [TBB1_CAEEL]	4044.01	41.04	20	132	4402.75	51.25	24	144	4134.27	56.69	22	135	0.67
P91910	mec-12	Tubulin alpha-3 chain OS=Caenorhabditis elegans GN=mec-12 PE=1 SV=1 - [TBA3_CAEEL]	662.083	36.67	15	36	1014.85	32.89	15	46	1108.83	51.78	21	40	0.67
Q95QN2	ddx-23	DEAD boX helicase homolog OS=Caenorhabditis elegans GN=ddx-23 PE=1 SV=1 - [Q95QN2_CAEEL]	665.793	22.19	14	23	716.569	26.44	17	27	741.982	26.99	16	24	0.67
Q23120	rsp-2	Probable splicing factor, arginine/serine-rich 2 OS=Caenorhabditis elegans GN=rsp-2 PE=3 SV=1 - [RSP2_CAEEL]	454.272	30.25	11	23	379.448	28.47	10	23	434.884	25.98	9	22	0.67
P91283	atp-3	ATP synthase subunit OS=Caenorhabditis elegans GN=atp-3 PE=1 SV=1 - [P91283_CAEEL]	705.41	48.79	11	22	698.43	57.49	13	22	616.306	57.49	12	21	0.67
Q09475	C28H8.3	Uncharacterized helicase C28H8.3 OS=Caenorhabditis elegans GN=C28H8.3 PE=3 SV=2 - [YP93_CAEEL]	405.951	7.23	11	23	238.277	7	11	14	332.256	8.75	13	17	0.67
P35603	dpy-23	AP-2 complex subunit mu OS=Caenorhabditis elegans GN=dpy-23 PE=2 SV=2 - [AP2M_CAEEL]	418.916	46.03	18	23	274.625	24.49	10	14	384.689	37.19	14	17	0.67
Q9N3F8	ral-1	RAL (Ras-related GTPase) homolog OS=Caenorhabditis elegans GN=ral-1 PE=1 SV=1 - [Q9N3F8_CAEEL]	123.74	21.13	5	5	355.85	19.72	6	8	295.143	22.07	5	6	0.67
Q18905	cgp-1	GTP-binding protein cgp-1 OS=Caenorhabditis elegans GN=cgp-1 PE=2 SV=2 - [CGP1_CAEEL]	213.83	13.7	7	9	91.4709	6.04	3	3	143.588	8.97	5	5	0.67
Q19555	scc-3	Cohesin subunit scc-3 OS=Caenorhabditis elegans GN=scc-3 PE=1 SV=1 - [SCC3_CAEEL]	39.05	2.65	3	3	113.027	3.74	4	4	52.2	2.65	3	3	0.67
I7EVK5	rab-11.1	Rab-11.1 (Fragment) OS=Caenorhabditis elegans GN=rab-11.1 PE=2 SV=1 - [I7EVK5_CAEEL]	73.8167	16.19	3	3	69.96	21.43	4	4	73.7333	14.29	3	3	0.67
N1NVB7	gcy-6	Receptor-type guanylate cyclase gcy-6 OS=Caenorhabditis elegans GN=gcy-6 PE=2 SV=1 - [GCY6_CAEEL]	22.57	0.92	1	2	19.81	0.92	1	3	21.91	0.92	1	2	0.67
Q10580	swp-1	Protein SWAP OS=Caenorhabditis elegans GN=swp-1 PE=2 SV=1 - [SWAP_CAEEL]	43.8179	3.47	2	2	60.4511	3.74	3	3	57.8	3.47	2	2	0.67
Q965W8	CELE_Y39H10A.6	Uncharacterized protein OS=Caenorhabditis elegans GN=CELE_Y39H10A.6 PE=1 SV=4 - [Q965W8_CAEEL]	40.38	3.13	2	2	77.77	4.76	3	3	80.78	3.27	2	2	0.67
D3YT37	pyk-2	Pyruvate kinase OS=Caenorhabditis elegans GN=pyk-2 PE=1 SV=1 - [D3YT37_CAEEL]	58.83	2.39	1	2	68.5333	4.34	2	3	59.34	2.39	1	2	0.67
P24894	cox-2	Cytochrome c oxidase subunit 2 OS=Caenorhabditis elegans GN=cox-2 PE=3 SV=2 - [COX2_CAEEL]	81.93	4.76	1	2	88.9569	7.79	2	3	79.25	4.76	1	2	0.67
Q17410	lin-24	Uncharacterized protein OS=Caenorhabditis elegans GN=lin-24 PE=1 SV=2 - [Q17410_CAEEL]	32.29	2.95	1	2	68.2843	8.86	2	3	59.7253	8.86	2	2	0.67
Q7JNM1	#VALUE!	Rab10-like (Fragment) OS=Caenorhabditis elegans PE=2 SV=1 - [Q7JNM1_CAEEL]	49.13	18.55	2	2	75.7533	27.42	3	3	69.07	17.74	2	2	0.67
O16454	tag-196	Uncharacterized protein OS=Caenorhabditis elegans GN=tag-196 PE=1 SV=2 - [O16454_CAEEL]	93.62	6.29	2	2	180.73	9.43	3	3	125.45	3.35	1	2	0.67
G5EBK3	erm-1	ERM-1B OS=Caenorhabditis elegans GN=erm-1 PE=1 SV=1 - [G5EBK3_CAEEL]	993.152	28.01	16	42	641.605	23.94	13	26	828.799	35.82	16	31	0.66
Q18359	C33A12.1	Probable NADH dehydrogenase [ubiquinone] 1 alpha subcomplex subunit 5 OS=Caenorhabditis elegans GN=C33A12.1 PE=3 SV=1 - [NDUA5_CAEEL]	335.547	52.67	9	14	302.468	52.67	9	14	482.734	40	7	13	0.66
Q94402	ZK265.6	Nucleolar protein 16 OS=Caenorhabditis elegans GN=ZK265.6 PE=3 SV=1 - [NOP16_CAEEL]	424.324	46.56	8	16	181.283	31.22	5	7	292.51	41.27	7	10	0.66
Q9N4Z7	mvk-1	MeValonate Kinase OS=Caenorhabditis elegans GN=mvk-1 PE=1 SV=2 - [Q9N4Z7_CAEEL]	225.01	20.1	9	10	188.04	15.16	7	8	209.89	10.38	5	8	0.66
P34547	usp-46	Ubiquitin carboxyl-terminal hydrolase 46 OS=Caenorhabditis elegans GN=usp-46 PE=1 SV=3 - [UBP46_CAEEL]	27.92	1.88	1	1	39	1.88	1	2	39.27	1.88	1	1	0.66
Q9XV52	gfm-1	Elongation factor G, mitochondrial OS=Caenorhabditis elegans GN=gfm-1 PE=3 SV=1 - [EFGM_CAEEL]	40.88	1.07	1	1	38.29	3.2	2	2	54.81	1.73	1	1	0.66
Q23126	W02B12.10	tRNA (guanine-N(7)-)-methyltransferase OS=Caenorhabditis elegans GN=W02B12.10 PE=3 SV=1 - [TRMB_CAEEL]	57.21	5.86	1	1	72.06	5.86	1	2	23.97	5.86	1	1	0.66
O01759	ppk-1	PIP Kinase OS=Caenorhabditis elegans GN=ppk-1 PE=1 SV=2 - [O01759_CAEEL]	25.49	1.31	1	1	39.11	3.6	2	2	22.3	1.31	1	1	0.66
Q9NAH7	aakb-2	AMP-Activated Kinase Beta subunit OS=Caenorhabditis elegans GN=aakb-2 PE=1 SV=1 - [Q9NAH7_CAEEL]	22.84	5.11	1	1	58.7	8.76	2	2	28.59	5.11	1	1	0.66
H8ESE9	CELE_Y11D7A.10	Uncharacterized protein OS=Caenorhabditis elegans GN=CELE_Y11D7A.10 PE=1 SV=1 - [H8ESE9_CAEEL]	52.74	13.73	1	1	47.75	45.1	2	2	52.74	13.73	1	1	0.66
Q9U1Z4	CELE_Y60A3A.9	Uncharacterized protein OS=Caenorhabditis elegans GN=CELE_Y60A3A.9 PE=1 SV=1 - [Q9U1Z4_CAEEL]	22.36	4.27	1	1	42.2654	7.58	2	2	34.34	4.27	1	1	0.66
Q93716	cfim-1	Cleavage Factor IM (CFIm) homolog OS=Caenorhabditis elegans GN=cfim-1 PE=1 SV=1 - [Q93716_CAEEL]	44.29	3.96	1	1	75.4475	10.57	2	2	26.25	6.61	1	1	0.66
O62347	CELE_R11.1	Uncharacterized protein OS=Caenorhabditis elegans GN=CELE_R11.1 PE=1 SV=3 - [O62347_CAEEL]	37.06	3.46	1	1	41.2	7.61	2	2	24.8	4.5	1	1	0.66
O16369	aps-1	AdaPtin, Small chain (Clathrin associated complex) OS=Caenorhabditis elegans GN=aps-1 PE=1 SV=1 - [O16369_CAEEL]	38.39	15.29	1	1	66.44	21.02	2	2	29.04	5.73	1	1	0.66
Q22540	CELE_T18D3.1	Uncharacterized protein OS=Caenorhabditis elegans GN=CELE_T18D3.1 PE=1 SV=1 - [Q22540_CAEEL]	74.16	4.02	2	2	173.682	8.8	5	7	138.398	8.41	3	4	0.65
O16202	lys-7	LYSozyme OS=Caenorhabditis elegans GN=lys-7 PE=1 SV=1 - [O16202_CAEEL]	202.48	16.96	3	6					76.15	10.95	2	2	0.65
P04255	his-11	Histone H2B 1 OS=Caenorhabditis elegans GN=his-11 PE=1 SV=4 - [H2B1_CAEEL]	1565.3	39.34	5	37	1369.39	39.34	5	36	1433.26	45.9	6	34	0.65
Q95Y89	lpd-7	Pescadillo homolog OS=Caenorhabditis elegans GN=lpd-7 PE=3 SV=1 - [PESC_CAEEL]	693.7	41.05	20	40	295.346	33.71	14	17	566.788	34.84	16	25	0.65
O17915	ran-1	GTP-binding nuclear protein ran-1 OS=Caenorhabditis elegans GN=ran-1 PE=1 SV=1 - [RAN_CAEEL]	373.963	47.91	7	15	765.743	55.81	10	29	603.02	53.95	10	21	0.65
Q23571	ZK669.4	Lipoamide acyltransferase component of branched-chain alpha-keto acid dehydrogenase complex, mitochondrial OS=Caenorhabditis elegans GN=ZK669.4 PE=3 SV=1 - [ODB2_CAEEL]	643.811	29.46	10	25	485.812	26.79	10	21	556.352	31.92	9	21	0.65
P52821	rps-25	40S ribosomal protein S25 OS=Caenorhabditis elegans GN=rps-25 PE=3 SV=1 - [RS25_CAEEL]	622.269	48.72	8	15	410.729	48.72	7	12	489.525	48.72	8	12	0.65
P61866	rpl-12	60S ribosomal protein L12 OS=Caenorhabditis elegans GN=rpl-12 PE=3 SV=1 - [RL12_CAEEL]	386.467	33.33	6	15	207.098	20.61	3	8	278.349	31.52	5	10	0.65
O61967	let-413	Protein lap1 OS=Caenorhabditis elegans GN=let-413 PE=1 SV=3 - [LAP1_CAEEL]	203.053	11.44	6	9	265.41	8.44	5	9	237.405	8.44	4	8	0.65
Q93537	plp-2	Pur alpha Like Protein OS=Caenorhabditis elegans GN=plp-2 PE=4 SV=1 - [Q93537_CAEEL]	214.584	25	4	7	185.21	19.27	3	5	167.7	19.27	3	5	0.65
Q18803	asg-2	Probable ATP synthase subunit g 2, mitochondrial OS=Caenorhabditis elegans GN=asg-2 PE=3 SV=1 - [ATPL2_CAEEL]	169.806	32.82	4	7	89.0167	16.03	2	3	82.1	22.14	3	4	0.65
Q9XWV4	CELE_Y37D8A.21	Uncharacterized protein OS=Caenorhabditis elegans GN=CELE_Y37D8A.21 PE=1 SV=2 - [Q9XWV4_CAEEL]	74.34	4.53	1	2	187.06	18.11	3	5	110.623	8.64	2	3	0.65
Q95Y04	rps-28	40S ribosomal protein S28 OS=Caenorhabditis elegans GN=rps-28 PE=3 SV=1 - [RS28_CAEEL]	217.891	49.23	5	6	137.15	40	3	4	134.868	44.62	4	4	0.64
G5EC67	2O16	2O16 OS=Caenorhabditis elegans GN=2O16 PE=1 SV=1 - [G5EC67_CAEEL]	188.073	21.72	4	6	68.77	10.25	2	2	109.113	16.39	3	3	0.64
P12844	myo-3	Myosin-3 OS=Caenorhabditis elegans GN=myo-3 PE=2 SV=1 - [MYO3_CAEEL]	1909.91	22.09	40	92	1591.27	17.67	32	72	1720.62	20.62	36	75	0.64
Q09622	puf-12	Pumilio domain-containing protein 12 OS=Caenorhabditis elegans GN=puf-12 PE=3 SV=1 - [PUF12_CAEEL]	678.339	25.46	24	39	339.347	17.89	15	20	512.16	22.98	20	26	0.64
O16376	CELE_M03F8.3	Uncharacterized protein OS=Caenorhabditis elegans GN=CELE_M03F8.3 PE=1 SV=2 - [O16376_CAEEL]	652.381	19.76	15	29	412.547	15.32	10	15	462.049	18.15	13	19	0.64
Q9N3F0	Y54E10A.10	Ribosome production factor 2 homolog OS=Caenorhabditis elegans GN=Y54E10A.10 PE=3 SV=1 - [RPF2_CAEEL]	699.407	37.37	11	25	484.19	32.66	9	14	621.045	34.68	9	17	0.64
O44503	CELE_R02D3.1	Uncharacterized protein OS=Caenorhabditis elegans GN=CELE_R02D3.1 PE=1 SV=1 - [O44503_CAEEL]	337.307	13.49	10	12	668.66	18.09	16	24	382.02	20.77	16	17	0.64
Q18786	snr-4	Probable small nuclear ribonucleoprotein Sm D2 OS=Caenorhabditis elegans GN=snr-4 PE=1 SV=1 - [SMD2_CAEEL]	779.434	44.92	5	19	504.034	44.92	4	11	583.59	47.46	4	13	0.64
P90860	CELE_F36A2.7	Uncharacterized protein OS=Caenorhabditis elegans GN=CELE_F36A2.7 PE=1 SV=1 - [P90860_CAEEL]	413.882	32.93	4	13	470.113	37.13	5	12	529.057	37.13	5	11	0.64
G5EBF4	CELE_T28H10.3	Uncharacterized protein OS=Caenorhabditis elegans GN=CELE_T28H10.3 PE=1 SV=1 - [G5EBF4_CAEEL]	134.78	16.67	5	7	251.754	16.67	5	11	213.108	11.9	5	8	0.64
P90789	D2030.4	NADH dehydrogenase [ubiquinone] 1 beta subcomplex subunit 7 OS=Caenorhabditis elegans GN=D2030.4 PE=3 SV=1 - [NDUB7_CAEEL]	71.35	13.01	1	1	126.69	26.83	2	4	68.8	26.83	2	2	0.64
G5EC24	ptp-2	Tyrosine-protein phosphatase non-receptor type OS=Caenorhabditis elegans GN=ptp-2 PE=1 SV=1 - [G5EC24_CAEEL]	73.89	2.1	1	1	140.4	8.53	4	4	67.38	2.1	1	2	0.64
O45946	rpl-18	60S ribosomal protein L18 OS=Caenorhabditis elegans GN=rpl-18 PE=3 SV=1 - [RL18_CAEEL]	1561.79	66.49	18	52	1383.59	66.49	18	42	1424.04	66.49	18	42	0.63
Q9NA74	CELE_Y57A10A.26	Uncharacterized protein OS=Caenorhabditis elegans GN=CELE_Y57A10A.26 PE=1 SV=1 - [Q9NA74_CAEEL]	510.285	49.07	12	18	549.014	48.7	11	20	592.288	51.67	12	17	0.63
O44512	isp-1	Cytochrome b-c1 complex subunit Rieske, mitochondrial OS=Caenorhabditis elegans GN=isp-1 PE=1 SV=1 - [O44512_CAEEL]	420.033	22.1	6	13	627.568	32.97	8	18	543.819	21.74	5	14	0.63
G5EDV3	cey-4	C. Elegans Y-box OS=Caenorhabditis elegans GN=cey-4 PE=1 SV=1 - [G5EDV3_CAEEL]	1176.9	42.18	10	25	263.15	29.25	6	7	709.937	32.65	9	13	0.63
O44985	teg-4	Tumorous Enhancer of Glp-1(Gf) OS=Caenorhabditis elegans GN=teg-4 PE=1 SV=1 - [O44985_CAEEL]	302.108	10.08	10	12	307.583	11.64	12	13	379.532	10.33	10	11	0.63
O45087	dyci-1	DYnein Chain, light Intermediate OS=Caenorhabditis elegans GN=dyci-1 PE=1 SV=1 - [O45087_CAEEL]	170.047	8.09	4	6	172.17	11.98	6	8	177.177	10.11	5	6	0.63
Q9BL73	ppk-2	PIP Kinase OS=Caenorhabditis elegans GN=ppk-2 PE=1 SV=1 - [Q9BL73_CAEEL]	143.4	15.96	5	6	128.655	17.71	6	8	180.573	20.45	6	6	0.63
Q94360	nduf-7	Probable NADH dehydrogenase [ubiquinone] iron-sulfur protein 7, mitochondrial OS=Caenorhabditis elegans GN=nduf-7 PE=3 SV=1 - [NDUS7_CAEEL]	200.13	23.12	4	5	205.37	23.12	4	5	248.4	19.6	3	4	0.63
Q21554	ddb-1	DNA damage-binding protein 1 OS=Caenorhabditis elegans GN=ddb-1 PE=1 SV=2 - [DDB1_CAEEL]	107.556	4.41	5	5	114.97	2.38	3	3	85.4796	2.03	3	3	0.63
Q95Y35	Y108G3AL.2	Uncharacterized protein OS=Caenorhabditis elegans GN=Y108G3AL.2 PE=4 SV=1 - [Q95Y35_CAEEL]	104.98	7.65	3	5	70.8233	5.5	2	3	58.5433	7.65	3	3	0.63
Q7JLJ3	ppm-1	Protein Phosphatase, Mg2+/Mn2+ dependent OS=Caenorhabditis elegans GN=ppm-1 PE=1 SV=1 - [Q7JLJ3_CAEEL]	175.35	15.8	4	5	114.386	8.72	2	3	155.87	11.17	3	3	0.63
Q22140	mrpl-16	Mitochondrial Ribosomal Protein, Large OS=Caenorhabditis elegans GN=mrpl-16 PE=1 SV=2 - [Q22140_CAEEL]	131.713	9.17	3	5	78.597	21.67	3	3	89.4523	9.17	2	3	0.63
Q9GYS9	mrpl-23	Probable 39S ribosomal protein L23, mitochondrial OS=Caenorhabditis elegans GN=mrpl-23 PE=3 SV=1 - [RM23_CAEEL]	95.59	32.08	4	5	31.29	4.4	1	1	122.35	19.5	2	2	0.63
Q9N2V9	pde-6	Probable 3',5'-cyclic phosphodiesterase pde-6 OS=Caenorhabditis elegans GN=pde-6 PE=3 SV=1 - [PDE6_CAEEL]	148.99	8.68	5	5	39.29	1.32	1	1	59.92	3.68	2	2	0.63
Q18036	C16A3.5	Uncharacterized protein OS=Caenorhabditis elegans GN=C16A3.5 PE=1 SV=1 - [Q18036_CAEEL]	151.86	31.9	4	5	26.99	8.59	1	1	125.01	16.56	2	2	0.63
Q22641	lpd-9	LiPid Depleted OS=Caenorhabditis elegans GN=lpd-9 PE=1 SV=1 - [Q22641_CAEEL]	82.22	36.64	4	5	58.72	11.45	1	1	130.27	11.45	1	2	0.63
G5EE12	cash-1	CKA And Striatin Homolog OS=Caenorhabditis elegans GN=cash-1 PE=1 SV=1 - [G5EE12_CAEEL]					60.1433	4.13	2	3	57.61	1.62	1	1	0.63
O61196	CELE_F37C4.6	Uncharacterized protein OS=Caenorhabditis elegans GN=CELE_F37C4.6 PE=1 SV=1 - [O61196_CAEEL]					49.3367	7.17	3	3	30.35	1.65	1	1	0.63
Q20089	ttr-20	TransThyretin-Related family domain OS=Caenorhabditis elegans GN=ttr-20 PE=4 SV=1 - [Q20089_CAEEL]					82.8533	20.83	2	3	31.26	12.5	1	1	0.63
V6CLT3	ketn-1	KETtiN (Drosophila actin-binding) homolog OS=Caenorhabditis elegans GN=ketn-1 PE=1 SV=1 - [V6CLT3_CAEEL]	3527.87	14.71	60	156	5213.35	20.57	89	241	4526.78	17.29	71	182	0.62
P16356	ama-1	DNA-directed RNA polymerase II subunit RPB1 OS=Caenorhabditis elegans GN=ama-1 PE=1 SV=3 - [RPB1_CAEEL]	460.991	5.66	10	23	327.212	6.68	12	17	329.65	5.82	10	17	0.62
Q09958	C18A3.3	Probable rRNA-processing protein EBP2 homolog OS=Caenorhabditis elegans GN=C18A3.3 PE=1 SV=2 - [EBP2_CAEEL]	335.716	16.76	5	14	268.388	12.94	4	8	251.654	16.47	5	9	0.62
Q22866	lev-11	Tropomyosin isoforms a/b/d/f OS=Caenorhabditis elegans GN=lev-11 PE=1 SV=1 - [TPM1_CAEEL]	278.363	36.97	8	14	140.72	29.23	6	8	203.098	36.97	9	9	0.62
Q966E7	Y104H12D.3	Uncharacterized protein OS=Caenorhabditis elegans GN=Y104H12D.3 PE=1 SV=2 - [Q966E7_CAEEL]	229.224	20.46	12	14	185.385	8.42	5	8	212.99	11.22	7	9	0.62
Q86NC8	CELE_F55F8.2	Uncharacterized protein OS=Caenorhabditis elegans GN=CELE_F55F8.2 PE=1 SV=1 - [Q86NC8_CAEEL]	399.331	20.55	12	15	175.171	12.95	6	7	180.771	10.36	6	9	0.62
Q9NEU2	pro-3	Protein SDA1 homolog OS=Caenorhabditis elegans GN=pro-3 PE=1 SV=4 - [SDA1_CAEEL]	271.98	10.74	9	14	110.743	5.24	4	6	184.655	8.74	6	8	0.62
P47209	cct-5	T-complex protein 1 subunit epsilon OS=Caenorhabditis elegans GN=cct-5 PE=2 SV=1 - [TCPE_CAEEL]	131.315	18.63	10	10	242.82	17.16	9	9	191.557	13.65	7	8	0.62
Q19302	CELE_F10E7.5	Uncharacterized protein OS=Caenorhabditis elegans GN=CELE_F10E7.5 PE=1 SV=1 - [Q19302_CAEEL]	401.142	36.82	7	10	376.548	34.55	6	9	259.97	37.73	6	8	0.62
O45379	arl-3	ADP-ribosylation factor-like protein 3 OS=Caenorhabditis elegans GN=arl-3 PE=1 SV=1 - [ARL3_CAEEL]	70.493	22.28	3	4	141.001	23.37	4	6	85.233	22.83	4	4	0.61
O01868	rpl-24.1	60S ribosomal protein L24 OS=Caenorhabditis elegans GN=rpl-24.1 PE=3 SV=1 - [RL24_CAEEL]	482.801	33.33	8	20	680.68	27.04	6	22	660.248	29.56	9	18	0.61
Q18409	rsp-6	Probable splicing factor, arginine/serine-rich 6 OS=Caenorhabditis elegans GN=rsp-6 PE=3 SV=1 - [RSP6_CAEEL]	667.11	30.73	5	16	525.37	30.73	6	15	390.938	30.73	5	13	0.61
P30651	ZK643.5	Uncharacterized protein ZK643.5 OS=Caenorhabditis elegans GN=ZK643.5 PE=4 SV=2 - [YOW5_CAEEL]	347.71	19.51	9	12	429.06	17.04	9	14	345.783	20.74	8	11	0.61
Q93761	F53C11.3	Uncharacterized oxidoreductase F53C11.3 OS=Caenorhabditis elegans GN=F53C11.3 PE=3 SV=1 - [YXEK_CAEEL]	331.889	42.49	9	13	297.683	35.46	7	11	334.699	30.99	7	10	0.61
G5EFH0	CELE_W09C5.1	Uncharacterized protein OS=Caenorhabditis elegans GN=CELE_W09C5.1 PE=1 SV=1 - [G5EFH0_CAEEL]	204.433	29.73	6	8	224.927	37.45	6	7	271.374	31.27	5	6	0.61
Q20448	ztf-7	Zinc finger putative Transcription Factor family OS=Caenorhabditis elegans GN=ztf-7 PE=1 SV=1 - [Q20448_CAEEL]	153.967	11.24	7	8	98.3	9.12	5	5	147.12	7	4	5	0.61
O44572	tni-4	Troponin I 4 OS=Caenorhabditis elegans GN=tni-4 PE=2 SV=2 - [TNNI4_CAEEL]	335.14	33.51	5	8	192.377	20.1	3	3	190.864	32.99	4	4	0.61
Q20720	CELE_F53F4.11	Uncharacterized protein OS=Caenorhabditis elegans GN=CELE_F53F4.11 PE=1 SV=2 - [Q20720_CAEEL]	326.72	11.79	5	8	195.893	3.87	2	3	201.36	7.73	3	4	0.61
G5ECZ0	hum-5	Heavy chain, Unconventional Myosin OS=Caenorhabditis elegans GN=hum-5 PE=1 SV=1 - [G5ECZ0_CAEEL]	130.387	7.28	7	8	42.8533	3.05	3	3	113.03	4.03	4	4	0.61
F1LIN5	num-1	NUMb related OS=Caenorhabditis elegans GN=num-1 PE=1 SV=1 - [F1LIN5_CAEEL]	112.57	3.93	2	4	113.6	6.17	3	4	76.0005	3.93	2	3	0.61
Q9N5E4	CELE_T02H6.11	Uncharacterized protein OS=Caenorhabditis elegans GN=CELE_T02H6.11 PE=1 SV=1 - [Q9N5E4_CAEEL]	99.2233	34.62	4	4	87.03	44.62	4	4	92.5477	27.69	3	3	0.61
Q18994	CELE_D2085.3	Uncharacterized protein OS=Caenorhabditis elegans GN=CELE_D2085.3 PE=1 SV=1 - [Q18994_CAEEL]	93.77	4.8	3	4	100.96	6.91	4	4	98.6933	5.11	3	3	0.61
H9G2V4	kin-20	Protein KINase OS=Caenorhabditis elegans GN=kin-20 PE=1 SV=1 - [H9G2V4_CAEEL]	115.95	15.82	4	4	97.9669	13.13	3	4	105.527	11.78	3	3	0.61
P34885	pkc-1	Protein kinase C-like 1B OS=Caenorhabditis elegans GN=pkc-1 PE=2 SV=2 - [KPC1B_CAEEL]	72.95	5.23	4	4	34.12	2.12	2	2	34.26	2.12	2	2	0.61
P21137	kin-1	cAMP-dependent protein kinase catalytic subunit OS=Caenorhabditis elegans GN=kin-1 PE=1 SV=3 - [KAPC1_CAEEL]	88.8309	10.64	4	4	68.93	4.7	2	2	91.43	6.19	2	2	0.61
Q23223	mtr-4	mRNA transport homolog 4 OS=Caenorhabditis elegans GN=mtr-4 PE=3 SV=1 - [MTR4_CAEEL]	132.257	4.48	4	4	29.03	1.95	2	2	72.5	2.14	2	2	0.61
O62327	gpx-2	Glutathione peroxidase 2 OS=Caenorhabditis elegans GN=gpx-2 PE=3 SV=1 - [GPX2_CAEEL]	92.9696	20.25	3	4	42.32	11.04	2	2	42.97	11.66	2	2	0.61
O45551	ife-1	Eukaryotic translation initiation factor 4E-1 OS=Caenorhabditis elegans GN=ife-1 PE=1 SV=2 - [IF4E1_CAEEL]	74.36	19.81	4	4	50.37	8.49	2	2	63.08	9.43	2	2	0.61
Q19583	CELE_F19B6.1	Uridine kinase OS=Caenorhabditis elegans GN=CELE_F19B6.1 PE=1 SV=1 - [Q19583_CAEEL]	104.66	6.8	3	4	69.65	5.44	2	2	117.54	5.44	2	2	0.61
Q9TZ90	mrpl-40	Mitochondrial Ribosomal Protein, Large OS=Caenorhabditis elegans GN=mrpl-40 PE=1 SV=1 - [Q9TZ90_CAEEL]	222.21	28.04	4	4	99.41	14.29	2	2	132.45	13.23	2	2	0.61
O61206	fbxc-52	F-box C protein OS=Caenorhabditis elegans GN=fbxc-52 PE=1 SV=2 - [O61206_CAEEL]	73.9605	10.41	4	4	52.78	4.31	2	2	42.92	6.35	2	2	0.61
Q19102	ard-1	Alcohol/Ribitol Dehydrogenase family OS=Caenorhabditis elegans GN=ard-1 PE=1 SV=1 - [Q19102_CAEEL]	108.51	22.48	4	4					43.39	4.65	1	1	0.61
Q9TZC8	CELE_Y71H10B.1	Uncharacterized protein OS=Caenorhabditis elegans GN=CELE_Y71H10B.1 PE=1 SV=2 - [Q9TZC8_CAEEL]	70.96	8.09	4	4					36.05	1.98	1	1	0.61
Q95XR0	Y39G10AR.8	Uncharacterized protein OS=Caenorhabditis elegans GN=Y39G10AR.8 PE=1 SV=1 - [Q95XR0_CAEEL]	814.81	35.39	13	25	1238.5	35.18	14	41	1071.53	44.14	17	29	0.6
Q9BIB7	hrpf-1	HnRNP F homolog OS=Caenorhabditis elegans GN=hrpf-1 PE=1 SV=1 - [Q9BIB7_CAEEL]	686.136	44.08	20	30	630.18	35.15	16	25	446.307	35.7	18	23	0.6
Q22370	ucr-2.2	Ubiquinol-Cytochrome c oxidoReductase complex OS=Caenorhabditis elegans GN=ucr-2.2 PE=1 SV=2 - [Q22370_CAEEL]	490.451	28.44	9	15	707.501	43.36	12	18	527.404	29.62	9	14	0.6
Q22021	R53.4	Putative ATP synthase subunit f, mitochondrial OS=Caenorhabditis elegans GN=R53.4 PE=3 SV=1 - [ATPK_CAEEL]	252.79	39.22	7	12	179.77	20.26	3	8	208.19	33.99	6	8	0.6
O01598	let-355	Uncharacterized protein OS=Caenorhabditis elegans GN=let-355 PE=1 SV=3 - [O01598_CAEEL]	309.912	12.97	9	11	180.494	10.98	7	7	173.921	9.46	6	7	0.6
Q9U210	CELE_Y57A10A.27	Uncharacterized protein OS=Caenorhabditis elegans GN=CELE_Y57A10A.27 PE=1 SV=1 - [Q9U210_CAEEL]	254.105	16.49	6	8	73.72	3.09	1	1	87.72	9.54	3	3	0.6
O76743	glh-4	ATP-dependent RNA helicase glh-4 OS=Caenorhabditis elegans GN=glh-4 PE=1 SV=2 - [GLH4_CAEEL]	99.0467	0.78	1	3	119.02	2.25	3	5	97.4533	0.78	1	3	0.6
P22981	let-60	Ras protein let-60 OS=Caenorhabditis elegans GN=let-60 PE=1 SV=1 - [LET60_CAEEL]	98.07	11.41	2	3	179.97	34.78	4	5	133.767	14.67	2	3	0.6
Q23655	nlt-1	Non-specific lipid-transfer protein-like 1 OS=Caenorhabditis elegans GN=nlt-1 PE=4 SV=1 - [NLTP1_CAEEL]	83.42	18.64	2	3	119.54	33.9	4	5	81.1967	16.95	2	3	0.6
G5EE80	CELE_F21D5.7	Uncharacterized protein OS=Caenorhabditis elegans GN=CELE_F21D5.7 PE=1 SV=1 - [G5EE80_CAEEL]	187.29	14.72	6	6	196.83	9.48	4	7	148.16	12.9	5	5	0.59
P91318	F53E10.6	RRP15-like protein OS=Caenorhabditis elegans GN=F53E10.6 PE=3 SV=1 - [RRP15_CAEEL]	974.801	45.03	15	38	843.51	29.84	13	30	755.668	27.75	12	28	0.59
Q22347	acdh-10	Probable medium-chain specific acyl-CoA dehydrogenase 10, mitochondrial OS=Caenorhabditis elegans GN=acdh-10 PE=2 SV=1 - [ACADM_CAEEL]	609.629	26.86	8	17	509.92	27.58	9	17	554.615	23.5	8	14	0.59
Q9U365	ngp-1	Nuclear/nucleolar GTP-binding Protein family OS=Caenorhabditis elegans GN=ngp-1 PE=1 SV=2 - [Q9U365_CAEEL]	416.608	25.34	14	22	196.658	15.71	9	11	225.037	18.92	11	13	0.59
Q9XU15	hxk-2	Hexokinase OS=Caenorhabditis elegans GN=hxk-2 PE=1 SV=1 - [Q9XU15_CAEEL]	88.0588	5.98	3	6	135.165	13.41	7	9	92.8978	12.68	6	6	0.59
O01590	CELE_K09H11.1	Uncharacterized protein OS=Caenorhabditis elegans GN=CELE_K09H11.1 PE=1 SV=2 - [O01590_CAEEL]	179.167	8.53	7	7	46.53	1.83	2	2	71.4833	2.94	3	3	0.59
P55956	asp-3	Aspartic protease 3 OS=Caenorhabditis elegans GN=asp-3 PE=1 SV=3 - [ASP3_CAEEL]	97.64	6.53	2	3	112.383	6.53	2	3	52.54	2.51	1	2	0.59
Q22799	dlc-1	Dynein light chain 1, cytoplasmic OS=Caenorhabditis elegans GN=dlc-1 PE=1 SV=1 - [DYL1_CAEEL]	219.537	14.61	3	6	121.32	14.61	2	3	123.79	14.61	3	3	0.58
Q22601	apa-2	AdaPtin, Alpha chain (Clathrin associated complex) OS=Caenorhabditis elegans GN=apa-2 PE=1 SV=2 - [Q22601_CAEEL]	97.0533	8.11	6	6	65.1867	4	3	3	81.9467	4	3	3	0.58
V6CLW5	nkb-3	Na+/K+ ATPase, Beta subunit OS=Caenorhabditis elegans GN=nkb-3 PE=1 SV=1 - [V6CLW5_CAEEL]	108.89	24.75	6	6	77.7267	14.19	3	3	66.02	7.26	3	3	0.58
Q09EE7	nsf-1	Uncharacterized protein OS=Caenorhabditis elegans GN=nsf-1 PE=1 SV=1 - [Q09EE7_CAEEL]	750.227	23.22	14	23	789.446	25.46	16	28	502.38	21.11	13	21	0.58
Q9N384	lec-6	Galectin OS=Caenorhabditis elegans GN=lec-6 PE=1 SV=1 - [Q9N384_CAEEL]	496.391	50.68	6	13	208.99	45.21	4	6	264.735	47.95	5	7	0.58
O62183	aly-2	Ref/ALY RNA export adaptor family OS=Caenorhabditis elegans GN=aly-2 PE=1 SV=1 - [O62183_CAEEL]	295.884	16.74	3	9	247.663	25.55	4	7	195.913	28.19	4	6	0.58
P41848	hmg-4	FACT complex subunit SSRP1-A OS=Caenorhabditis elegans GN=hmg-4 PE=3 SV=1 - [SSP1A_CAEEL]	188.32	12.05	8	10	101.66	6.31	4	4	79.57	5.74	4	5	0.58
Q23635	CELE_ZK84.1	Uncharacterized protein OS=Caenorhabditis elegans GN=CELE_ZK84.1 PE=1 SV=1 - [Q23635_CAEEL]	51.5591	2.62	2	7					36.88	4.49	2	2	0.58
O17586	pas-1	Proteasome subunit alpha type-6 OS=Caenorhabditis elegans GN=pas-1 PE=1 SV=1 - [PSA6_CAEEL]	65.19	8.54	2	2	133.26	18.29	4	4	86.34	9.76	2	2	0.58
P58798	arx-6	Probable actin-related protein 2/3 complex subunit 4 OS=Caenorhabditis elegans GN=arx-6 PE=3 SV=1 - [ARPC4_CAEEL]	93.65	17.75	3	3	51.14	6.51	1	1	46.52	6.51	1	1	0.58
Q09442	sap-49	Splicing factor 3B subunit 4 OS=Caenorhabditis elegans GN=sap-49 PE=1 SV=2 - [SF3B4_CAEEL]	50.28	9.02	3	3	23.44	2.58	1	1	25.68	2.58	1	1	0.58
Q09278	C45G9.5	Uncharacterized protein C45G9.5 OS=Caenorhabditis elegans GN=C45G9.5 PE=4 SV=1 - [YQI5_CAEEL]	106.743	14.56	3	3	40.84	3.16	1	1	33.76	3.8	1	1	0.58
G3MTX3	tlk-1	Tousled-Like Kinase OS=Caenorhabditis elegans GN=tlk-1 PE=1 SV=1 - [G3MTX3_CAEEL]	72.0767	4.3	3	3	55.74	1.24	1	1	61.99	1.24	1	1	0.58
Q967F1	eif-1	Eukaryotic Initiation Factor OS=Caenorhabditis elegans GN=eif-1 PE=1 SV=1 - [Q967F1_CAEEL]	67.6234	22.94	3	3	47.68	13.76	1	1	0	6.42	1	1	0.58
Q21843	wapl-1	WAPL (Drosophila Wings APart-Like cohesin interactor) OS=Caenorhabditis elegans GN=wapl-1 PE=1 SV=1 - [Q21843_CAEEL]	68.1267	3.49	3	3	30.12	1.34	1	1	31.19	1.21	1	1	0.58
H2KYN0	vps-45	Related to yeast Vacuolar Protein Sorting factor OS=Caenorhabditis elegans GN=vps-45 PE=1 SV=1 - [H2KYN0_CAEEL]	88.85	6.22	3	3	34.3	1.83	1	1	45.01	1.83	1	1	0.58
Q95QL3	CELE_F11A10.7	Uncharacterized protein OS=Caenorhabditis elegans GN=CELE_F11A10.7 PE=1 SV=1 - [Q95QL3_CAEEL]	97.5433	8.38	3	3	46.05	3.05	1	1	56.47	3.05	1	1	0.58
P91343	wdr-12	Ribosome biogenesis protein WDR12 homolog OS=Caenorhabditis elegans GN=wdr-12 PE=3 SV=1 - [WDR12_CAEEL]	946.005	41.69	15	37	528.689	30.3	12	20	663.533	35.76	13	22	0.57
Q18813	C53D6.7	Galectin OS=Caenorhabditis elegans GN=C53D6.7 PE=1 SV=3 - [Q18813_CAEEL]	213.43	21.22	7	9	567.928	32.8	11	20	337.363	29.26	9	12	0.57
Q688Z3	CELE_Y94H6A.5	Uncharacterized protein OS=Caenorhabditis elegans GN=CELE_Y94H6A.5 PE=1 SV=1 - [Q688Z3_CAEEL]	253.964	10.79	9	13	307.888	11.27	9	15	201.873	12.36	10	11	0.57
Q10943	arf-1.2	ADP-ribosylation factor 1-like 2 OS=Caenorhabditis elegans GN=arf-1.2 PE=2 SV=2 - [ARF12_CAEEL]	188.748	48.62	6	7	246.356	56.35	8	11	170.127	33.15	4	7	0.57
P62784	his-1	Histone H4 OS=Caenorhabditis elegans GN=his-1 PE=1 SV=2 - [H4_CAEEL]	1232.53	48.54	10	40	848.14	48.54	9	29	845.578	57.28	10	27	0.56
Q18076	C18B2.5	Uncharacterized protein OS=Caenorhabditis elegans GN=C18B2.5 PE=1 SV=1 - [Q18076_CAEEL]	796.111	27.49	14	30	682.494	29.87	15	28	594.967	25.85	12	23	0.56
Q94230	plp-1	Pur alpha Like Protein OS=Caenorhabditis elegans GN=plp-1 PE=1 SV=1 - [Q94230_CAEEL]	740.643	70.8	19	31	418.534	68.14	15	19	430.015	66.81	14	19	0.56
P34559	ech-6	Probable enoyl-CoA hydratase, mitochondrial OS=Caenorhabditis elegans GN=ech-6 PE=3 SV=1 - [ECHM_CAEEL]	271.318	19.44	4	9	76.0133	13.89	3	3	123.16	19.44	4	4	0.56
Q9BPN5	oig-6	One IG domain OS=Caenorhabditis elegans GN=oig-6 PE=1 SV=2 - [Q9BPN5_CAEEL]	26.17	5.92	1	1	79.6	16.45	3	5	90.56	13.16	2	2	0.56
Q22743	raga-1	RAs-related GTP-binding protein A OS=Caenorhabditis elegans GN=raga-1 PE=1 SV=1 - [Q22743_CAEEL]	26.22	3.21	1	1	86.44	16.03	5	5	59.41	7.37	2	2	0.56
Q9XXA7	tag-131	Neuferricin homolog OS=Caenorhabditis elegans GN=tag-131 PE=3 SV=1 - [NEUFC_CAEEL]	61.58	7.67	2	2	64.62	7.67	2	2	36.61	3.68	1	1	0.56
Q95XX0	ubc-13	Ubiquitin-conjugating enzyme E2 13 OS=Caenorhabditis elegans GN=ubc-13 PE=1 SV=2 - [UBC13_CAEEL]	89.8	12.58	1	2	111.24	12.58	1	2	32.91	12.58	1	1	0.56
A3QMC8	tag-335	Mannose-1-phosphate guanyltransferase beta OS=Caenorhabditis elegans GN=tag-335 PE=3 SV=1 - [GMPPB_CAEEL]	83.44	5.48	1	2	69.33	10.14	2	2	55.54	5.48	1	1	0.56
Q9BL33	CELE_Y71H2AM.4	Uncharacterized protein OS=Caenorhabditis elegans GN=CELE_Y71H2AM.4 PE=1 SV=1 - [Q9BL33_CAEEL]	74.84	8.63	1	2	59.98	21.58	2	2	40.9	8.63	1	1	0.56
G5EBY3	nmy-2	Non-muscle MYosin OS=Caenorhabditis elegans GN=nmy-2 PE=1 SV=1 - [G5EBY3_CAEEL]	57.36	0.85	2	2	26.23	0.3	1	2	47.98	0.65	1	1	0.56
I7FW36	rab-6.2	Rab-6.2 (Fragment) OS=Caenorhabditis elegans GN=rab-6.2 PE=2 SV=1 - [I7FW36_CAEEL]	57.53	18.14	2	2	43.7	11.27	2	2	34.61	5.39	1	1	0.56
O01789	him-1	Structural maintenance of chromosomes protein 1 OS=Caenorhabditis elegans GN=him-1 PE=1 SV=4 - [SMC1_CAEEL]	27.13	2.85	2	2	65.54	2.46	2	2	28	0.95	1	1	0.56
H2L0E1	CELE_Y77E11A.7	Uncharacterized protein OS=Caenorhabditis elegans GN=CELE_Y77E11A.7 PE=1 SV=1 - [H2L0E1_CAEEL]	33.1	3.99	2	2	65.64	3.99	2	2	52.99	2.6	1	1	0.56
O61743	B0205.8	Uncharacterized protein OS=Caenorhabditis elegans GN=B0205.8 PE=1 SV=1 - [O61743_CAEEL]	96.99	15	1	2	82.07	15	1	2	63.51	15	1	1	0.56
Q20058	CELE_F35G12.12	Uncharacterized protein OS=Caenorhabditis elegans GN=CELE_F35G12.12 PE=1 SV=3 - [Q20058_CAEEL]	39.84	3.46	2	2	23.48	3.46	2	2	26.36	1.63	1	1	0.56
Q21939	mrpl-49	Probable 39S ribosomal protein L49, mitochondrial OS=Caenorhabditis elegans GN=mrpl-49 PE=3 SV=2 - [RM49_CAEEL]	46.02	14.44	2	2	64.98	12.3	2	2	22.38	11.23	1	1	0.56
O02219	aha-1	Aryl hydrocarbon receptor nuclear translocator homolog OS=Caenorhabditis elegans GN=aha-1 PE=1 SV=1 - [AHA1_CAEEL]	56.75	3.31	1	2	61.81	3.31	1	2	36.13	3.31	1	1	0.56
Q9GUE9	CELE_Y73B6BL.27	Uncharacterized protein OS=Caenorhabditis elegans GN=CELE_Y73B6BL.27 PE=1 SV=3 - [Q9GUE9_CAEEL]	43.92	12.98	2	2	38.67	12.98	2	2	45.51	8.4	1	1	0.56
H2FLH3	unc-22	Uncharacterized protein OS=Caenorhabditis elegans GN=unc-22 PE=1 SV=1 - [H2FLH3_CAEEL]	1991.8	8.59	51	109	1810.65	6.26	43	95	1727.52	6.88	43	80	0.55
P02567	myo-1	Myosin-1 OS=Caenorhabditis elegans GN=myo-1 PE=1 SV=3 - [MYO1_CAEEL]	1504.67	16.46	28	80	1531.4	15.48	27	71	1084.89	15.33	23	59	0.55
G5EFS5	CELE_F45D11.15	Uncharacterized protein OS=Caenorhabditis elegans GN=CELE_F45D11.15 PE=4 SV=1 - [G5EFS5_CAEEL]	1850.24	47.11	26	91	927.449	43.31	25	51	1077.89	50.1	24	54	0.55
G5EDZ5	unc-43	Uncharacterized protein OS=Caenorhabditis elegans GN=unc-43 PE=1 SV=1 - [G5EDZ5_CAEEL]	673.01	16.59	9	21	424.367	15.42	8	16	496.045	16.89	8	14	0.55
Q9XWV2	Y37D8A.2	Putative phospholipase B-like 1 OS=Caenorhabditis elegans GN=Y37D8A.2 PE=1 SV=1 - [PLBL1_CAEEL]	213.787	22.07	9	11	407.855	26.8	11	13	400.072	14.71	6	9	0.55
[truncated: 626 more rows]

## Sheet: N2
Accession	gene name	Description	# AAs	MW [kDa]	calc. pI	# Proteins	# Unique Peptides	Score	Coverage	# Peptides	# PSMs
Q22053	fib-1	rRNA 2'-O-methyltransferase fibrillarin OS=Caenorhabditis elegans GN=fib-1 PE=3 SV=1 - [FBRL_CAEEL]	352	36.3607	10.2573	1	37	22877.6	67.61	37	715
Q21276	K07C5.4	Uncharacterized NOP5 family protein K07C5.4 OS=Caenorhabditis elegans GN=K07C5.4 PE=3 SV=1 - [YZVL_CAEEL]	486	54.4774	8.55811	1	51	20965	78.4	51	588
O45012	nol-5	NucleOLar protein OS=Caenorhabditis elegans GN=nol-5 PE=1 SV=1 - [O45012_CAEEL]	487	54.5965	7.13721	1	54	16811	86.45	54	436
P02566	unc-54	Myosin-4 OS=Caenorhabditis elegans GN=unc-54 PE=1 SV=2 - [MYO4_CAEEL]	1963	224.617	5.74463	2	52	10124.9	33.21	66	343
P52275	tbb-2	Tubulin beta-2 chain OS=Caenorhabditis elegans GN=tbb-2 PE=3 SV=1 - [TBB2_CAEEL]	450	50.3122	4.89404	1	2	7855.53	53.33	25	224
O17921	tbb-1	TuBulin, Beta OS=Caenorhabditis elegans GN=tbb-1 PE=1 SV=1 - [O17921_CAEEL]	449	50.2062	4.89404	1	4	7611.54	53.45	25	217
Q18817	ben-1	Uncharacterized protein OS=Caenorhabditis elegans GN=ben-1 PE=1 SV=3 - [Q18817_CAEEL]	444	49.4148	4.94482	1	1	5999.03	45.5	21	184
P41937	tbb-4	Tubulin beta-4 chain OS=Caenorhabditis elegans GN=tbb-4 PE=3 SV=1 - [TBB4_CAEEL]	444	49.7678	4.91943	1	2	4899.44	36.94	17	142
O02056	rpl-4	60S ribosomal protein L4 OS=Caenorhabditis elegans GN=rpl-4 PE=1 SV=3 - [RL4_CAEEL]	345	38.6352	11.2241	1	31	4407.28	62.9	31	119
G8JY38	vit-2	VITellogenin structural genes (Yolk protein genes) OS=Caenorhabditis elegans GN=vit-2 PE=1 SV=1 - [G8JY38_CAEEL]	1558	180.809	7.50342	4	21	4357.13	46.28	70	204
Q6A8K1	act-4	Actin-4 OS=Caenorhabditis elegans GN=act-4 PE=3 SV=1 - [Q6A8K1_CAEEL]	362	40.4002	5.8335	5	12	4236.94	63.54	26	122
P12845	myo-2	Myosin-2 OS=Caenorhabditis elegans GN=myo-2 PE=1 SV=2 - [MYO2_CAEEL]	1947	222.911	6.34131	2	26	4212.57	19.36	38	147
P12456	mec-7	Tubulin beta-1 chain OS=Caenorhabditis elegans GN=mec-7 PE=2 SV=1 - [TBB1_CAEEL]	441	49.2288	5.0083	1	7	4044.01	41.04	20	132
P18948	vit-6	Vitellogenin-6 OS=Caenorhabditis elegans GN=vit-6 PE=1 SV=5 - [VIT6_CAEEL]	1651	193.197	7.2251	1	74	4019.99	45.25	74	177
P46561	atp-2	ATP synthase subunit beta, mitochondrial OS=Caenorhabditis elegans GN=atp-2 PE=1 SV=2 - [ATPB_CAEEL]	538	57.4909	5.77002	1	22	3923.43	57.62	22	116
Q9N368	CELE_Y55F3AM.3	Uncharacterized protein OS=Caenorhabditis elegans GN=CELE_Y55F3AM.3 PE=1 SV=2 - [Q9N368_CAEEL]	580	64.9312	10.8579	2	27	3915.56	35.86	27	184
O45865	ant-1.1	Adenine Nucleotide Translocator OS=Caenorhabditis elegans GN=ant-1.1 PE=1 SV=1 - [O45865_CAEEL]	300	33.0234	9.71533	5	22	3912.75	63.67	30	139
O17919	K01G5.5	Putative H/ACA ribonucleoprotein complex subunit 4 OS=Caenorhabditis elegans GN=K01G5.5 PE=3 SV=1 - [DKC1_CAEEL]	445	50.1788	8.6167	1	37	3671.63	75.73	37	146
Q9XXK1	H28O16.1	ATP synthase subunit alpha, mitochondrial OS=Caenorhabditis elegans GN=H28O16.1 PE=1 SV=1 - [ATPA_CAEEL]	538	57.7516	8.93896	2	36	3644.87	61.15	36	131
P53013	eft-3	Elongation factor 1-alpha OS=Caenorhabditis elegans GN=eft-3 PE=3 SV=1 - [EF1A_CAEEL]	463	50.6363	8.93896	4	24	3581.53	58.96	24	122
V6CLT3	ketn-1	KETtiN (Drosophila actin-binding) homolog OS=Caenorhabditis elegans GN=ketn-1 PE=1 SV=1 - [V6CLT3_CAEEL]	4848	541.294	5.68115	12	60	3527.87	14.71	60	156
Q19328	tsn-1	Tudor Staphylococcal Nuclease homolog OS=Caenorhabditis elegans GN=tsn-1 PE=1 SV=1 - [Q19328_CAEEL]	914	100.714	7.75244	1	42	3381.59	46.72	42	113
Q9XUW5	ddx-17	DEAD boX helicase homolog OS=Caenorhabditis elegans GN=ddx-17 PE=1 SV=1 - [Q9XUW5_CAEEL]	561	60.3933	9.18799	1	36	3336.06	55.44	36	124
O44991	lpd-6	LiPid Depleted OS=Caenorhabditis elegans GN=lpd-6 PE=1 SV=2 - [O44991_CAEEL]	573	63.7449	10.1108	2	31	3252.92	42.76	31	107
Q9TYK1	Y66H1A.4	Probable H/ACA ribonucleoprotein complex subunit 1-like protein OS=Caenorhabditis elegans GN=Y66H1A.4 PE=3 SV=2 - [GAR1_CAEEL]	244	24.611	10.9312	1	12	3181.71	31.56	12	91
P55155	vit-1	Vitellogenin-1 OS=Caenorhabditis elegans GN=vit-1 PE=1 SV=2 - [VIT1_CAEEL]	1616	187.946	6.93213	3	1	3153.13	30.26	51	151
Q4W5R4	laf-1	Uncharacterized protein OS=Caenorhabditis elegans GN=laf-1 PE=1 SV=1 - [Q4W5R4_CAEEL]	643	69.8534	6.87354	3	23	3041.71	36.39	25	107
P34574	chc-1	Probable clathrin heavy chain 1 OS=Caenorhabditis elegans GN=chc-1 PE=3 SV=1 - [CLH_CAEEL]	1681	191.421	5.99854	1	44	3033.05	30.22	44	121
P34690	tba-2	Tubulin alpha-2 chain OS=Caenorhabditis elegans GN=tba-2 PE=2 SV=1 - [TBA2_CAEEL]	448	49.8814	5.04639	2	3	2938.98	57.37	23	98
Q9NEN6	rps-6	40S ribosomal protein S6 OS=Caenorhabditis elegans GN=rps-6 PE=1 SV=1 - [RS6_CAEEL]	246	28.1183	10.2573	3	22	2797.81	52.85	22	79
P06125	vit-5	Vitellogenin-5 OS=Caenorhabditis elegans GN=vit-5 PE=2 SV=2 - [VIT5_CAEEL]	1603	186.322	7.00537	1	16	2784.49	29.2	50	143
Q18688	daf-21	Heat shock protein 90 OS=Caenorhabditis elegans GN=daf-21 PE=1 SV=1 - [HSP90_CAEEL]	702	80.2326	5.04639	2	27	2750.1	41.45	29	87
P09446	hsp-1	Heat shock 70 kDa protein A OS=Caenorhabditis elegans GN=hsp-1 PE=1 SV=2 - [HSP7A_CAEEL]	640	69.6796	5.64307	3	22	2748.66	43.59	25	85
O45815	act-5	ACTin OS=Caenorhabditis elegans GN=act-5 PE=1 SV=1 - [O45815_CAEEL]	375	41.8459	5.68115	1	11	2743.08	63.47	25	83
P29691	eef-2	Elongation factor 2 OS=Caenorhabditis elegans GN=eef-2 PE=2 SV=4 - [EF2_CAEEL]	852	94.7354	6.52197	1	36	2688.92	39.32	36	103
O18688	tba-1	TuBulin, Alpha OS=Caenorhabditis elegans GN=tba-1 PE=1 SV=1 - [O18688_CAEEL]	449	49.9774	5.04639	4	3	2541.43	57.46	23	86
Q21568	M28.5	NHP2-like protein 1 homolog OS=Caenorhabditis elegans GN=M28.5 PE=3 SV=1 - [NH2L1_CAEEL]	128	13.9925	7.95752	1	9	2325.01	58.59	10	76
Q7JQD2	#VALUE!	Elongation factor Tu homologue (Fragment) OS=Caenorhabditis elegans PE=2 SV=1 - [Q7JQD2_CAEEL]	495	54.4694	7.82568	2	30	2299.11	48.69	30	91
Q9UB29	let-805	Myotactin form A OS=Caenorhabditis elegans GN=let-805 PE=1 SV=1 - [Q9UB29_CAEEL]	4280	479.259	6.50732	4	56	2288.18	16.38	56	89
P47991	rpl-6	60S ribosomal protein L6 OS=Caenorhabditis elegans GN=rpl-6 PE=1 SV=1 - [RL6_CAEEL]	217	24.2977	10.9897	1	17	2247.18	54.84	17	65
P90735	eat-6	Sodium/potassium-transporting ATPase subunit alpha OS=Caenorhabditis elegans GN=eat-6 PE=1 SV=1 - [P90735_CAEEL]	996	110.932	5.52881	3	32	2204.39	36.35	32	69
Q19286	ifb-2	Intermediate filament protein ifb-2 OS=Caenorhabditis elegans GN=ifb-2 PE=1 SV=1 - [IFB2_CAEEL]	543	61.5735	5.64307	3	35	2168.21	62.25	36	83
G5EDD4	tba-4	TuBulin, Alpha OS=Caenorhabditis elegans GN=tba-4 PE=1 SV=1 - [G5EDD4_CAEEL]	448	49.9284	5.0083	2	3	2065.17	43.08	18	66
Q9XU13	sca-1	Calcium-transporting ATPase OS=Caenorhabditis elegans GN=sca-1 PE=1 SV=1 - [Q9XU13_CAEEL]	1004	109.647	5.12256	3	24	2064.4	26.29	24	67
P18334	kin-3	Casein kinase II subunit alpha OS=Caenorhabditis elegans GN=kin-3 PE=1 SV=1 - [CSK2A_CAEEL]	360	42.2304	6.93213	2	23	2044.42	71.11	23	66
P27639	inf-1	Eukaryotic initiation factor 4A OS=Caenorhabditis elegans GN=inf-1 PE=2 SV=1 - [IF4A_CAEEL]	402	45.379	5.14795	2	20	2030.25	52.99	21	58
O17218	rps-22	Ribosomal Protein, Small subunit OS=Caenorhabditis elegans GN=rps-22 PE=1 SV=1 - [O17218_CAEEL]	130	14.724	10.4185	2	14	2024.98	76.15	14	51
H2FLH3	unc-22	Uncharacterized protein OS=Caenorhabditis elegans GN=unc-22 PE=1 SV=1 - [H2FLH3_CAEEL]	6848	754.05	5.88428	5	51	1991.8	8.59	51	109
Q9N4J2	vit-3	Vitellogenin-3 OS=Caenorhabditis elegans GN=vit-3 PE=1 SV=1 - [VIT3_CAEEL]	1603	186.413	6.90283	1	3	1917.98	22.46	37	106
P12844	myo-3	Myosin-3 OS=Caenorhabditis elegans GN=myo-3 PE=2 SV=1 - [MYO3_CAEEL]	1969	225.371	5.65576	2	32	1909.91	22.09	40	92
Q9N3S3	rnp-6	RNP (RRM RNA binding domain) containing OS=Caenorhabditis elegans GN=rnp-6 PE=1 SV=1 - [Q9N3S3_CAEEL]	339	37.2258	8.68994	3	16	1854.03	59	16	68
G5EFS5	CELE_F45D11.15	Uncharacterized protein OS=Caenorhabditis elegans GN=CELE_F45D11.15 PE=4 SV=1 - [G5EFS5_CAEEL]	501	58.5174	5.65576	3	26	1850.24	47.11	26	91
P48156	rps-8	40S ribosomal protein S8 OS=Caenorhabditis elegans GN=rps-8 PE=3 SV=1 - [RS8_CAEEL]	208	23.7358	10.5503	2	18	1842.4	67.31	18	45
Q8MXS2	uaf-1	U2AF splicing factor OS=Caenorhabditis elegans GN=uaf-1 PE=1 SV=1 - [Q8MXS2_CAEEL]	471	52.4627	5.5542	3	12	1821.16	36.52	12	46
O45181	CELE_K07H8.10	Uncharacterized protein OS=Caenorhabditis elegans GN=CELE_K07H8.10 PE=1 SV=1 - [O45181_CAEEL]	798	86.768	4.76709	1	21	1817.89	17.29	21	59
O01802	rpl-7	60S ribosomal protein L7 OS=Caenorhabditis elegans GN=rpl-7 PE=3 SV=1 - [RL7_CAEEL]	244	28.1143	10.1548	1	26	1807.02	71.72	26	64
Q93572	rpa-0	60S acidic ribosomal protein P0 OS=Caenorhabditis elegans GN=rpa-0 PE=1 SV=3 - [RLA0_CAEEL]	312	33.7525	6.7124	1	17	1801.26	60.9	18	50
Q9N3X2	rps-4	40S ribosomal protein S4 OS=Caenorhabditis elegans GN=rps-4 PE=1 SV=1 - [RS4_CAEEL]	259	29.0258	10.4624	1	23	1794.38	66.8	23	80
P19626	mlc-2	Myosin regulatory light chain 2 OS=Caenorhabditis elegans GN=mlc-2 PE=3 SV=1 - [MLR2_CAEEL]	170	18.5914	5.21143	1	2	1789.99	71.76	16	57
Q20616	skpo-1	Peroxidase skpo-1 OS=Caenorhabditis elegans GN=skpo-1 PE=2 SV=1 - [SKPO1_CAEEL]	655	73.4495	8.39697	1	16	1772.29	25.19	16	51
P19625	mlc-1	Myosin regulatory light chain 1 OS=Caenorhabditis elegans GN=mlc-1 PE=3 SV=1 - [MLR1_CAEEL]	170	18.6054	5.21143	1	2	1708.68	71.76	16	54
Q18599	acer-1	ACEtyl-CoA Regulator OS=Caenorhabditis elegans GN=acer-1 PE=1 SV=3 - [Q18599_CAEEL]	471	50.7225	8.54346	1	20	1653.15	72.4	20	46
P48154	rps-1	40S ribosomal protein S3a OS=Caenorhabditis elegans GN=rps-1 PE=3 SV=2 - [RS3A_CAEEL]	257	28.9424	9.59814	1	21	1604.02	50.97	21	58
O17732	pyc-1	Pyruvate carboxylase 1 OS=Caenorhabditis elegans GN=pyc-1 PE=1 SV=1 - [PYC1_CAEEL]	1175	129.204	6.99072	2	35	1603.62	35.15	35	70
Q18265	fust-1	FUS/TLS RNA binding protein homolog OS=Caenorhabditis elegans GN=fust-1 PE=1 SV=2 - [Q18265_CAEEL]	448	45.1666	9.21729	1	11	1590.51	21.65	11	44
P04255	his-11	Histone H2B 1 OS=Caenorhabditis elegans GN=his-11 PE=1 SV=4 - [H2B1_CAEEL]	122	13.4923	10.4038	5	5	1565.3	39.34	5	37
O45946	rpl-18	60S ribosomal protein L18 OS=Caenorhabditis elegans GN=rpl-18 PE=3 SV=1 - [RL18_CAEEL]	188	20.9836	11.3999	1	18	1561.79	66.49	18	52
P40614	F01G4.6	Phosphate carrier protein, mitochondrial OS=Caenorhabditis elegans GN=F01G4.6 PE=2 SV=1 - [MPCP_CAEEL]	340	36.65	8.95361	2	14	1542.01	43.82	14	47
O01658	jmjc-1	Bifunctional lysine-specific demethylase and histidyl-hydroxylase NO66 OS=Caenorhabditis elegans GN=jmjc-1 PE=3 SV=2 - [NO66_CAEEL]	748	85.9726	4.98291	1	23	1536.9	31.55	23	52
Q966C6	rpl-7A	60S ribosomal protein L7a OS=Caenorhabditis elegans GN=rpl-7A PE=1 SV=3 - [RL7A_CAEEL]	265	30.1559	10.8286	3	22	1533.75	46.42	22	64
H2KYR1	vig-1	VIG (Drosophila Vasa Intronic Gene) ortholog OS=Caenorhabditis elegans GN=vig-1 PE=1 SV=1 - [H2KYR1_CAEEL]	378	40.3824	9.72998	1	14	1531.53	41.8	14	38
Q17350	#VALUE!	Polyadenylate-binding protein OS=Caenorhabditis elegans PE=2 SV=1 - [Q17350_CAEEL]	646	71.5605	9.02686	4	16	1525.85	40.71	21	56
G5ECP9	vab-10	Uncharacterized protein OS=Caenorhabditis elegans GN=vab-10 PE=1 SV=1 - [G5ECP9_CAEEL]	3424	388.016	5.79541	13	34	1522.93	10.92	34	64
Q22135	CELE_T04A8.6	Uncharacterized protein OS=Caenorhabditis elegans GN=CELE_T04A8.6 PE=1 SV=1 - [Q22135_CAEEL]	307	33.8978	10.7554	1	15	1519.38	50.16	15	46
P50880	rpl-3	60S ribosomal protein L3 OS=Caenorhabditis elegans GN=rpl-3 PE=2 SV=1 - [RL3_CAEEL]	401	45.6306	10.4038	3	20	1517.93	47.13	20	68
P02567	myo-1	Myosin-1 OS=Caenorhabditis elegans GN=myo-1 PE=1 SV=3 - [MYO1_CAEEL]	1938	223.185	6.07471	2	22	1504.67	16.46	28	80
Q95XJ0	CELE_Y69A2AR.18	Uncharacterized protein OS=Caenorhabditis elegans GN=CELE_Y69A2AR.18 PE=1 SV=1 - [Q95XJ0_CAEEL]	299	32.362	9.0415	3	15	1501.79	37.12	15	40
P53588	F47B10.1	Probable succinyl-CoA ligase [ADP-forming] subunit beta, mitochondrial OS=Caenorhabditis elegans GN=F47B10.1 PE=3 SV=1 - [SUCB1_CAEEL]	435	47.3886	6.354	1	18	1466.28	36.09	18	49
O02286	pck-2	Phosphoenolypyruvate CarboxyKinase OS=Caenorhabditis elegans GN=pck-2 PE=1 SV=1 - [O02286_CAEEL]	654	73.3847	6.16357	4	15	1447.04	35.17	20	60
Q03577	drs-1	Aspartate--tRNA ligase, cytoplasmic OS=Caenorhabditis elegans GN=drs-1 PE=3 SV=1 - [SYDC_CAEEL]	531	59.9015	6.44287	1	22	1424.54	43.31	22	58
O62213	cey-1	C. Elegans Y-box OS=Caenorhabditis elegans GN=cey-1 PE=1 SV=1 - [O62213_CAEEL]	208	21.3365	10.4038	1	6	1423.45	38.94	6	21
Q21752	vdac-1	Probable voltage-dependent anion-selective channel OS=Caenorhabditis elegans GN=vdac-1 PE=3 SV=2 - [VDAC_CAEEL]	283	29.9424	9.21729	1	22	1422.95	74.91	22	44
Q8MQG0	unc-44	Uncharacterized protein OS=Caenorhabditis elegans GN=unc-44 PE=1 SV=1 - [Q8MQG0_CAEEL]	1841	201.112	6.1001	13	24	1414.73	17.06	26	48
Q9NLD1	hrp-2	HnRNP A1 homolog OS=Caenorhabditis elegans GN=hrp-2 PE=1 SV=2 - [Q9NLD1_CAEEL]	611	65.8787	6.31592	3	24	1375.89	37.15	25	80
Q10663	icl-1	Bifunctional glyoxylate cycle protein OS=Caenorhabditis elegans GN=icl-1 PE=1 SV=2 - [GCP_CAEEL]	968	108.561	6.88818	1	31	1364.97	33.99	31	60
O44144	perm-4	PERMeable eggshell OS=Caenorhabditis elegans GN=perm-4 PE=1 SV=2 - [O44144_CAEEL]	331	34.9447	6.22705	1	11	1362.7	19.34	11	40
G5ED33	eps-8	EPS (Human endocytosis) related OS=Caenorhabditis elegans GN=eps-8 PE=1 SV=1 - [G5ED33_CAEEL]	917	104.301	7.79639	10	23	1340.28	30.21	23	50
G5EFU2	ant-1.4	Adenine Nucleotide Translocator OS=Caenorhabditis elegans GN=ant-1.4 PE=2 SV=1 - [G5EFU2_CAEEL]	313	34.3342	9.77393	2	1	1337.47	32.27	10	43
Q23312	rps-7	40S ribosomal protein S7 OS=Caenorhabditis elegans GN=rps-7 PE=3 SV=1 - [RS7_CAEEL]	194	22.0443	9.90576	1	16	1322.65	62.89	16	49
P49405	rpl-5	60S ribosomal protein L5 OS=Caenorhabditis elegans GN=rpl-5 PE=3 SV=1 - [RL5_CAEEL]	293	33.3657	9.75928	1	16	1316.88	60.07	16	33
Q22651	col-164	COLlagen OS=Caenorhabditis elegans GN=col-164 PE=1 SV=1 - [Q22651_CAEEL]	396	38.6031	4.77979	1	3	1298.14	15.15	3	20
Q9NEW6	rsp-3	Probable splicing factor, arginine/serine-rich 3 OS=Caenorhabditis elegans GN=rsp-3 PE=1 SV=2 - [RSP3_CAEEL]	258	28.6633	10.2866	1	20	1292.22	59.69	20	60
P98080	ucr-1	Cytochrome b-c1 complex subunit 1, mitochondrial OS=Caenorhabditis elegans GN=ucr-1 PE=3 SV=2 - [UCR1_CAEEL]	471	51.7042	6.53662	1	21	1273.22	55.41	21	39
O45552	acaa-2	ACetyl-CoA Acyltransferase 2 homolog OS=Caenorhabditis elegans GN=acaa-2 PE=1 SV=2 - [O45552_CAEEL]	394	41.2648	8.98291	1	17	1260.2	58.12	17	36
Q18947	CELE_D1054.11	Uncharacterized protein OS=Caenorhabditis elegans GN=CELE_D1054.11 PE=1 SV=1 - [Q18947_CAEEL]	317	33.7419	5.10986	1	6	1250.61	26.81	6	38
P51403	rps-2	40S ribosomal protein S2 OS=Caenorhabditis elegans GN=rps-2 PE=3 SV=1 - [RS2_CAEEL]	272	28.9424	10.1108	1	16	1249.46	45.96	16	50
P62784	his-1	Histone H4 OS=Caenorhabditis elegans GN=his-1 PE=1 SV=2 - [H4_CAEEL]	103	11.3623	11.1948	1	10	1232.53	48.54	10	40
Q9N4H7	copa-1	Coatomer subunit alpha OS=Caenorhabditis elegans GN=copa-1 PE=1 SV=2 - [Q9N4H7_CAEEL]	1232	137.62	6.65381	1	28	1206.5	25.32	28	49
Q22494	vha-15	Probable V-type proton ATPase subunit H 2 OS=Caenorhabditis elegans GN=vha-15 PE=3 SV=1 - [VATH2_CAEEL]	470	54.1784	6.31592	1	19	1203.85	42.55	19	38
Q9XW92	vha-13	V-type proton ATPase catalytic subunit A OS=Caenorhabditis elegans GN=vha-13 PE=1 SV=3 - [VATA_CAEEL]	606	66.4177	5.18604	1	18	1185.09	34.32	18	47
G5EDV3	cey-4	C. Elegans Y-box OS=Caenorhabditis elegans GN=cey-4 PE=1 SV=1 - [G5EDV3_CAEEL]	294	32.3994	9.49561	1	10	1176.9	42.18	10	25
Q93714	idha-1	Probable isocitrate dehydrogenase [NAD] subunit alpha, mitochondrial OS=Caenorhabditis elegans GN=idha-1 PE=3 SV=3 - [IDH3A_CAEEL]	358	38.4418	7.38623	1	15	1175.35	47.49	15	35
Q9TXQ1	tank-1	Tankyrase-like protein OS=Caenorhabditis elegans GN=tank-1 PE=2 SV=1 - [TNKS1_CAEEL]	2276	254.416	8.6167	1	28	1165.57	14.41	28	48
P91128	rpl-13	60S ribosomal protein L13 OS=Caenorhabditis elegans GN=rpl-13 PE=3 SV=1 - [RL13_CAEEL]	207	23.7381	11.0923	1	16	1157.69	58.45	16	40
Q8MXD9	CELE_E02D9.1	Uncharacterized protein OS=Caenorhabditis elegans GN=CELE_E02D9.1 PE=1 SV=1 - [Q8MXD9_CAEEL]	315	33.1384	8.47021	2	11	1122.31	37.14	11	40
Q69Z13	CELE_K08E3.5	Uncharacterized protein OS=Caenorhabditis elegans GN=CELE_K08E3.5 PE=1 SV=1 - [Q69Z13_CAEEL]	493	54.9277	7.09326	6	18	1113.27	39.15	18	41
P48152	rps-3	40S ribosomal protein S3 OS=Caenorhabditis elegans GN=rps-3 PE=3 SV=1 - [RS3_CAEEL]	247	27.2965	9.59814	1	22	1111.34	74.49	22	45
P27420	hsp-3	Heat shock 70 kDa protein C OS=Caenorhabditis elegans GN=hsp-3 PE=3 SV=2 - [HSP7C_CAEEL]	661	72.9785	5.05908	1	3	1109.69	15.28	9	27
Q19626	vha-12	Probable V-type proton ATPase subunit B OS=Caenorhabditis elegans GN=vha-12 PE=3 SV=1 - [VATB_CAEEL]	491	54.716	5.47803	1	11	1053.52	35.44	14	42
Q9U2U0	uaf-2	U2AF splicing factor OS=Caenorhabditis elegans GN=uaf-2 PE=1 SV=1 - [Q9U2U0_CAEEL]	285	30.8365	8.55811	2	14	1049.16	48.42	14	26
Q9XVR8	nola-3	Putative H/ACA ribonucleoprotein complex subunit 3 OS=Caenorhabditis elegans GN=nola-3 PE=3 SV=2 - [NOP10_CAEEL]	64	7.52703	10.1694	1	6	1035.33	70.31	6	28
Q09508	sdha-1	Succinate dehydrogenase [ubiquinone] flavoprotein subunit, mitochondrial OS=Caenorhabditis elegans GN=sdha-1 PE=2 SV=3 - [SDHA_CAEEL]	646	70.3543	6.85889	2	17	1033.26	31.11	17	37
P52819	rpl-22	60S ribosomal protein L22 OS=Caenorhabditis elegans GN=rpl-22 PE=1 SV=3 - [RL22_CAEEL]	130	14.9371	9.80322	1	11	1025.76	66.15	11	29
P46769	rps-0	40S ribosomal protein SA OS=Caenorhabditis elegans GN=rps-0 PE=1 SV=3 - [RSSA_CAEEL]	276	30.6836	5.69385	1	13	1017.03	64.13	13	38
P20163	hsp-4	Heat shock 70 kDa protein D OS=Caenorhabditis elegans GN=hsp-4 PE=1 SV=2 - [HSP7D_CAEEL]	657	72.244	5.13525	1	1	1006.69	10.81	7	22
P48150	rps-14	40S ribosomal protein S14 OS=Caenorhabditis elegans GN=rps-14 PE=3 SV=1 - [RS14_CAEEL]	152	16.2387	10.4038	1	11	1000.58	51.97	11	28
P42168	kin-19	Casein kinase I isoform alpha OS=Caenorhabditis elegans GN=kin-19 PE=3 SV=1 - [KC1A_CAEEL]	341	39.012	9.5542	1	12	994.574	41.35	13	35
Q9N4I4	rpl-10a	60S ribosomal protein L10a OS=Caenorhabditis elegans GN=rpl-10a PE=3 SV=1 - [RL10A_CAEEL]	216	24.1221	9.92041	3	7	993.894	31.02	7	27
G5EES2	erm-1	ERM-1A OS=Caenorhabditis elegans GN=erm-1 PE=1 SV=1 - [G5EES2_CAEEL]	563	65.9595	6.97607	3	16	993.152	28.06	16	42
P54811	cdc-48.1	Transitional endoplasmic reticulum ATPase homolog 1 OS=Caenorhabditis elegans GN=cdc-48.1 PE=1 SV=1 - [TERA1_CAEEL]	809	89.7291	5.32568	1	6	988.286	26.21	19	40
P91318	F53E10.6	RRP15-like protein OS=Caenorhabditis elegans GN=F53E10.6 PE=3 SV=1 - [RRP15_CAEEL]	191	21.5066	5.14795	1	15	974.801	45.03	15	38
Q9XVF7	rpl-8	60S ribosomal protein L8 OS=Caenorhabditis elegans GN=rpl-8 PE=3 SV=1 - [RL8_CAEEL]	260	28.1863	11.063	1	13	964.26	50.38	13	37
Q23670	K12D12.1	Probable DNA topoisomerase 2 OS=Caenorhabditis elegans GN=K12D12.1 PE=3 SV=2 - [TOP2_CAEEL]	1520	172.226	8.51416	2	22	952.923	16.12	22	45
Q18943	CELE_D1054.10	Uncharacterized protein OS=Caenorhabditis elegans GN=CELE_D1054.10 PE=1 SV=1 - [Q18943_CAEEL]	188	20.5674	8.83643	1	10	947.915	34.57	10	37
P91343	wdr-12	Ribosome biogenesis protein WDR12 homolog OS=Caenorhabditis elegans GN=wdr-12 PE=3 SV=1 - [WDR12_CAEEL]	439	48.9716	5.17334	1	15	946.005	41.69	15	37
Q19579	pab-2	Polyadenylate-binding protein OS=Caenorhabditis elegans GN=pab-2 PE=1 SV=1 - [Q19579_CAEEL]	692	75.9339	9.0708	2	5	928.871	16.47	10	29
Q9XVP0	rps-15	40S ribosomal protein S15 OS=Caenorhabditis elegans GN=rps-15 PE=1 SV=3 - [RS15_CAEEL]	151	17.2325	10.3159	1	7	905.239	45.7	7	27
Q9BIC3	ech-1.2	Enoyl-CoA Hydratase OS=Caenorhabditis elegans GN=ech-1.2 PE=1 SV=1 - [Q9BIC3_CAEEL]	755	81.4354	9.29053	3	11	903.757	24.64	16	31
Q8MXJ1	CELE_T23E7.2	Uncharacterized protein OS=Caenorhabditis elegans GN=CELE_T23E7.2 PE=1 SV=1 - [Q8MXJ1_CAEEL]	908	98.2247	4.33545	2	3	901.121	16.3	12	29
P51404	rps-13	40S ribosomal protein S13 OS=Caenorhabditis elegans GN=rps-13 PE=3 SV=2 - [RS13_CAEEL]	151	17.3055	10.7114	1	9	893.406	34.44	9	39
O76830	#VALUE!	Aspartic protease OS=Caenorhabditis elegans PE=2 SV=1 - [O76830_CAEEL]	395	42.6855	6.22705	2	8	890.03	23.54	8	23
P34369	prp-8	Pre-mRNA-splicing factor 8 homolog OS=Caenorhabditis elegans GN=prp-8 PE=1 SV=1 - [PRP8_CAEEL]	2329	271.855	8.82178	1	36	886.271	15.37	36	52
O61815	B0511.6	Uncharacterized protein OS=Caenorhabditis elegans GN=B0511.6 PE=1 SV=2 - [O61815_CAEEL]	544	61.2372	8.99756	1	13	868.632	27.02	13	28
Q95Y90	rpl-9	60S ribosomal protein L9 OS=Caenorhabditis elegans GN=rpl-9 PE=3 SV=1 - [RL9_CAEEL]	189	21.4946	10.0815	1	9	866.272	45.5	9	28
O45904	lec-1	Galectin OS=Caenorhabditis elegans GN=lec-1 PE=1 SV=1 - [O45904_CAEEL]	285	32.6636	6.85889	1	1	862.437	55.09	18	29
O45734	cpl-1	CathePsin L family OS=Caenorhabditis elegans GN=cpl-1 PE=1 SV=1 - [O45734_CAEEL]	337	38.0935	6.01123	2	9	860.438	24.93	9	20
P36573	lec-1	32 kDa beta-galactoside-binding lectin OS=Caenorhabditis elegans GN=lec-1 PE=1 SV=1 - [LEC1_CAEEL]	279	31.7902	6.59521	1	1	856.031	54.84	18	29
O02328	eif-3.C	Eukaryotic translation initiation factor 3 subunit C OS=Caenorhabditis elegans GN=eif-3.C PE=3 SV=2 - [EIF3C_CAEEL]	898	103.778	6.1001	1	19	854.741	19.6	19	39
Q21215	rack-1	Guanine nucleotide-binding protein subunit beta-2-like 1 OS=Caenorhabditis elegans GN=rack-1 PE=1 SV=3 - [GBLP_CAEEL]	325	35.8079	6.93213	1	12	850.581	46.77	12	29
Q23621	gdh-1	Glutamate dehydrogenase OS=Caenorhabditis elegans GN=gdh-1 PE=1 SV=1 - [Q23621_CAEEL]	536	58.7578	7.31299	1	17	849.826	37.13	17	35
Q09533	rpl-10	60S ribosomal protein L10 OS=Caenorhabditis elegans GN=rpl-10 PE=3 SV=1 - [RL10_CAEEL]	214	24.7328	10.3452	1	13	847.151	45.33	13	41
P34334	rpl-21	60S ribosomal protein L21 OS=Caenorhabditis elegans GN=rpl-21 PE=1 SV=3 - [RL21_CAEEL]	161	18.2989	11.1509	1	13	843.166	54.04	13	31
Q19126	asb-2	ATP Synthase B homolog OS=Caenorhabditis elegans GN=asb-2 PE=1 SV=1 - [Q19126_CAEEL]	305	34.915	8.73389	1	15	836.01	39.67	15	30
B3WFT8	C14F11.4	Uncharacterized protein OS=Caenorhabditis elegans GN=C14F11.4 PE=1 SV=1 - [B3WFT8_CAEEL]	384	43.1416	9.45166	7	12	836.002	37.5	13	35
H2FLJ1	stl-1	STomatin-Like OS=Caenorhabditis elegans GN=stl-1 PE=1 SV=1 - [H2FLJ1_CAEEL]	324	35.6218	6.63916	1	14	825.37	58.95	14	25
P54812	cdc-48.2	Transitional endoplasmic reticulum ATPase homolog 2 OS=Caenorhabditis elegans GN=cdc-48.2 PE=1 SV=2 - [TERA2_CAEEL]	810	89.584	5.38916	1	3	822.586	20.86	16	33
O45757	CELE_T06E6.1	Uncharacterized protein OS=Caenorhabditis elegans GN=CELE_T06E6.1 PE=1 SV=1 - [O45757_CAEEL]	431	48.5	5.77002	1	11	817.96	34.11	11	27
Q95XR0	Y39G10AR.8	Uncharacterized protein OS=Caenorhabditis elegans GN=Y39G10AR.8 PE=1 SV=1 - [Q95XR0_CAEEL]	469	51.2019	8.74854	1	13	814.81	35.39	13	25
Q17334	sodh-1	Alcohol dehydrogenase 1 OS=Caenorhabditis elegans GN=sodh-1 PE=2 SV=2 - [ADH1_CAEEL]	349	37.6723	6.52197	2	16	808.113	48.14	16	30
O44906	pck-1	Phosphoenolypyruvate CarboxyKinase OS=Caenorhabditis elegans GN=pck-1 PE=1 SV=2 - [O44906_CAEEL]	651	73.1525	6.46826	4	11	804.147	28.11	16	34
Q18076	C18B2.5	Uncharacterized protein OS=Caenorhabditis elegans GN=C18B2.5 PE=1 SV=1 - [Q18076_CAEEL]	673	74.7642	6.68311	2	14	796.111	27.49	14	30
P91914	rpl-27	60S ribosomal protein L27 OS=Caenorhabditis elegans GN=rpl-27 PE=2 SV=1 - [RL27_CAEEL]	136	15.7179	10.3452	1	8	796.092	49.26	8	29
H2KYP1	lntl-1	LIN-24 (Twenty-four) Like OS=Caenorhabditis elegans GN=lntl-1 PE=1 SV=1 - [H2KYP1_CAEEL]	302	34.0163	6.32861	3	13	787.816	39.07	13	32
P10567	unc-15	Paramyosin OS=Caenorhabditis elegans GN=unc-15 PE=1 SV=1 - [MYSP_CAEEL]	882	101.888	5.37646	2	13	782.122	19.05	13	27
Q18786	snr-4	Probable small nuclear ribonucleoprotein Sm D2 OS=Caenorhabditis elegans GN=snr-4 PE=1 SV=1 - [SMD2_CAEEL]	118	13.259	9.67139	1	5	779.434	44.92	5	19
Q9U2A9	Y48B6A.1	Ribosome biogenesis protein BOP1 homolog OS=Caenorhabditis elegans GN=Y48B6A.1 PE=3 SV=1 - [BOP1_CAEEL]	674	77.3323	8.27979	1	14	775.233	26.41	14	27
Q10013	snr-3	Probable small nuclear ribonucleoprotein Sm D1 OS=Caenorhabditis elegans GN=snr-3 PE=3 SV=1 - [SMD1_CAEEL]	126	13.6164	11.7222	2	6	767.124	52.38	6	20
Q17763	atp-5	ATP synthase subunit OS=Caenorhabditis elegans GN=atp-5 PE=1 SV=2 - [Q17763_CAEEL]	191	21.7843	7.1958	1	12	765.037	57.07	12	26
Q20476	CELE_F46G10.1	Uncharacterized protein OS=Caenorhabditis elegans GN=CELE_F46G10.1 PE=1 SV=3 - [Q20476_CAEEL]	178	20.3554	8.85107	1	13	763.082	65.17	13	23
O01869	rps-10	Ribosomal Protein, Small subunit OS=Caenorhabditis elegans GN=rps-10 PE=1 SV=1 - [O01869_CAEEL]	149	16.8599	9.37842	1	8	754.971	54.36	8	23
H2KZS3	CELE_T23E7.2	Uncharacterized protein OS=Caenorhabditis elegans GN=CELE_T23E7.2 PE=1 SV=2 - [H2KZS3_CAEEL]	900	97.8313	4.55127	1	1	751.329	15.78	12	26
Q09EE7	nsf-1	Uncharacterized protein OS=Caenorhabditis elegans GN=nsf-1 PE=1 SV=1 - [Q09EE7_CAEEL]	758	83.773	7.07861	2	13	750.227	23.22	14	23
Q94230	plp-1	Pur alpha Like Protein OS=Caenorhabditis elegans GN=plp-1 PE=1 SV=1 - [Q94230_CAEEL]	226	25.4993	9.26123	1	16	740.643	70.8	19	31
Q04908	rpn-3	26S proteasome non-ATPase regulatory subunit 3 OS=Caenorhabditis elegans GN=rpn-3 PE=1 SV=1 - [PSMD3_CAEEL]	504	57.4708	7.48877	1	16	740.06	33.53	16	24
O44480	rpl-20	60S ribosomal protein L18a OS=Caenorhabditis elegans GN=rpl-20 PE=3 SV=2 - [RL18A_CAEEL]	180	20.9461	10.3745	1	15	735.96	57.78	15	25
Q11067	tag-320	Probable protein disulfide-isomerase A6 OS=Caenorhabditis elegans GN=tag-320 PE=3 SV=1 - [PDIA6_CAEEL]	440	47.6979	6.16357	1	11	734.533	36.36	11	16
H2L0S8	CELE_Y119D3B.12	Uncharacterized protein OS=Caenorhabditis elegans GN=CELE_Y119D3B.12 PE=1 SV=1 - [H2L0S8_CAEEL]	339	40.4469	8.41162	2	9	733.083	27.73	9	21
Q9U1Q4	vrs-2	Valine--tRNA ligase OS=Caenorhabditis elegans GN=vrs-2 PE=1 SV=1 - [SYV_CAEEL]	1050	118.846	6.69775	1	20	727.741	22.19	20	30
O18650	rps-19	40S ribosomal protein S19 OS=Caenorhabditis elegans GN=rps-19 PE=2 SV=1 - [RS19_CAEEL]	146	16.3118	10.2866	1	12	725.164	64.38	12	28
Q19162	rpl-11.2	Ribosomal Protein, Large subunit OS=Caenorhabditis elegans GN=rpl-11.2 PE=1 SV=1 - [Q19162_CAEEL]	196	22.7622	10.0229	1	2	718.99	37.76	8	33
Q20168	copb-2	Probable coatomer subunit beta' OS=Caenorhabditis elegans GN=copb-2 PE=3 SV=3 - [COPB2_CAEEL]	1000	111.038	5.09717	1	20	718.047	24.2	20	28
Q9BL19	rpl-17	60S ribosomal protein L17 OS=Caenorhabditis elegans GN=rpl-17 PE=3 SV=1 - [RL17_CAEEL]	187	21.4993	10.3013	1	13	715.645	43.32	13	33
Q9U1Q7	emb-4	Uncharacterized protein OS=Caenorhabditis elegans GN=emb-4 PE=1 SV=4 - [Q9U1Q7_CAEEL]	1467	170.061	6.56592	4	17	709.382	11.93	17	32
Q18787	rpt-1	26S protease regulatory subunit 7 OS=Caenorhabditis elegans GN=rpt-1 PE=1 SV=1 - [PRS7_CAEEL]	435	48.58	6.48096	1	8	707.251	24.83	9	19
H9G351	unc-52	Uncharacterized protein OS=Caenorhabditis elegans GN=unc-52 PE=1 SV=1 - [H9G351_CAEEL]	2296	250.238	5.32568	9	2	706.667	11.15	19	31
V6CKR1	icd-2	Inhibitor of Cell Death OS=Caenorhabditis elegans GN=icd-2 PE=1 SV=1 - [V6CKR1_CAEEL]	180	20.0212	5.16064	2	2	705.464	55.56	7	19
P91283	atp-3	ATP synthase subunit OS=Caenorhabditis elegans GN=atp-3 PE=1 SV=1 - [P91283_CAEEL]	207	22.3761	9.81787	2	11	705.41	48.79	11	22
O01692	rps-17	40S ribosomal protein S17 OS=Caenorhabditis elegans GN=rps-17 PE=3 SV=2 - [RS17_CAEEL]	130	14.9288	9.84717	1	9	699.506	46.15	9	23
Q9N3F0	Y54E10A.10	Ribosome production factor 2 homolog OS=Caenorhabditis elegans GN=Y54E10A.10 PE=3 SV=1 - [RPF2_CAEEL]	297	33.4387	9.75928	1	11	699.407	37.37	11	25
G5EG85	unc-70	Beta-G spectrin OS=Caenorhabditis elegans GN=unc-70 PE=1 SV=1 - [G5EG85_CAEEL]	2257	262.066	5.46533	4	23	695.833	13.42	23	31
Q20647	rpl-25.2	60S ribosomal protein L23a 2 OS=Caenorhabditis elegans GN=rpl-25.2 PE=3 SV=1 - [R23A2_CAEEL]	146	16.2731	10.5649	1	8	695.29	45.21	10	20
Q21067	ifc-2	Intermediate filament protein ifc-2 OS=Caenorhabditis elegans GN=ifc-2 PE=2 SV=3 - [IFC2_CAEEL]	622	70.0588	6.75635	1	21	693.702	32.48	24	36
Q95Y89	lpd-7	Pescadillo homolog OS=Caenorhabditis elegans GN=lpd-7 PE=3 SV=1 - [PESC_CAEEL]	531	61.5863	9.42236	1	20	693.7	41.05	20	40
B3CJ34	gcn-1	GCN (Yeast General Control Nondrepressible) homolog OS=Caenorhabditis elegans GN=gcn-1 PE=1 SV=2 - [B3CJ34_CAEEL]	2651	291.415	6.17627	1	23	691.879	9.92	23	35
O18240	rps-18	Ribosomal Protein, Small subunit OS=Caenorhabditis elegans GN=rps-18 PE=1 SV=1 - [O18240_CAEEL]	154	17.7596	10.4624	1	8	690.572	45.45	8	23
Q9BIB7	hrpf-1	HnRNP F homolog OS=Caenorhabditis elegans GN=hrpf-1 PE=1 SV=1 - [Q9BIB7_CAEEL]	549	61.7357	6.771	2	20	686.136	44.08	20	30
Q21481	dhs-28	DeHydrogenases, Short chain OS=Caenorhabditis elegans GN=dhs-28 PE=1 SV=1 - [Q21481_CAEEL]	436	46.2338	8.93896	1	15	683.536	47.71	15	19
P91917	ola-1	Obg-like ATPase 1 OS=Caenorhabditis elegans GN=ola-1 PE=3 SV=1 - [OLA1_CAEEL]	395	44.3232	6.88818	2	15	678.451	42.28	15	24
Q09622	puf-12	Pumilio domain-containing protein 12 OS=Caenorhabditis elegans GN=puf-12 PE=3 SV=1 - [PUF12_CAEEL]	766	86.9007	9.31982	1	24	678.339	25.46	24	39
G5EDZ5	unc-43	Uncharacterized protein OS=Caenorhabditis elegans GN=unc-43 PE=1 SV=1 - [G5EDZ5_CAEEL]	681	75.654	7.69385	4	9	673.01	16.59	9	21
Q22235	enpl-1	Endoplasmin homolog OS=Caenorhabditis elegans GN=enpl-1 PE=3 SV=1 - [ENPL1_CAEEL]	760	87.0584	5.05908	1	7	672.394	13.42	9	19
Q94300	rpl-11.1	60S ribosomal protein L11 OS=Caenorhabditis elegans GN=rpl-11.1 PE=3 SV=1 - [RL11_CAEEL]	196	22.7002	9.99365	1	2	671.719	31.63	8	32
Q18409	rsp-6	Probable splicing factor, arginine/serine-rich 6 OS=Caenorhabditis elegans GN=rsp-6 PE=3 SV=1 - [RSP6_CAEEL]	179	20.4694	11.7368	1	5	667.11	30.73	5	16
Q95QN2	ddx-23	DEAD boX helicase homolog OS=Caenorhabditis elegans GN=ddx-23 PE=1 SV=1 - [Q95QN2_CAEEL]	730	84.7247	9.27588	1	14	665.793	22.19	14	23
Q9N3F4	vbh-1	Vasa-and Belle-like Helicase OS=Caenorhabditis elegans GN=vbh-1 PE=1 SV=1 - [Q9N3F4_CAEEL]	641	69.1761	8.73389	4	9	665.682	16.69	11	28
H9G352	unc-52	Uncharacterized protein OS=Caenorhabditis elegans GN=unc-52 PE=1 SV=1 - [H9G352_CAEEL]	2193	239.377	5.50342	2	1	664.34	10.9	18	30
P91910	mec-12	Tubulin alpha-3 chain OS=Caenorhabditis elegans GN=mec-12 PE=1 SV=1 - [TBA3_CAEEL]	450	50.0806	5.14795	1	8	662.083	36.67	15	36
Q95QR5	C44B7.2	Uncharacterized protein OS=Caenorhabditis elegans GN=C44B7.2 PE=1 SV=2 - [Q95QR5_CAEEL]	597	66.5185	7.07861	2	14	661.951	23.12	14	24
Q23258	CELE_ZC373.2	Uncharacterized protein OS=Caenorhabditis elegans GN=CELE_ZC373.2 PE=1 SV=2 - [Q23258_CAEEL]	104	11.0511	8.14795	1	3	656.892	43.27	3	15
Q6LD30	unc-87	Unc-87 protein OS=Caenorhabditis elegans GN=unc-87 PE=4 SV=1 - [Q6LD30_CAEEL]	357	39.7134	8.89502	2	12	656.433	37.54	12	17
O16376	CELE_M03F8.3	Uncharacterized protein OS=Caenorhabditis elegans GN=CELE_M03F8.3 PE=1 SV=2 - [O16376_CAEEL]	744	87.93	5.26221	2	15	652.381	19.76	15	29
P34524	K12H4.3	Ribosome biogenesis protein BRX1 homolog OS=Caenorhabditis elegans GN=K12H4.3 PE=3 SV=1 - [BRX1_CAEEL]	352	40.2086	9.0708	1	11	652.18	43.18	11	23
O16368	rpt-2	Probable 26S protease regulatory subunit 4 OS=Caenorhabditis elegans GN=rpt-2 PE=3 SV=1 - [PRS4_CAEEL]	443	49.6917	6.16357	1	13	649.552	33.63	13	25
Q19070	eft-1	Eft-1 protein OS=Caenorhabditis elegans GN=eft-1 PE=4 SV=1 - [Q19070_CAEEL]	849	96.1718	6.12549	2	17	646.743	21.91	17	27
Q23121	rsp-1	Probable splicing factor, arginine/serine-rich 1 OS=Caenorhabditis elegans GN=rsp-1 PE=3 SV=1 - [RSP1_CAEEL]	312	35.0208	11.2827	1	13	644.041	33.33	13	31
Q23571	ZK669.4	Lipoamide acyltransferase component of branched-chain alpha-keto acid dehydrogenase complex, mitochondrial OS=Caenorhabditis elegans GN=ZK669.4 PE=3 SV=1 - [ODB2_CAEEL]	448	49.6599	8.54346	1	10	643.811	29.46	10	25
P90897	rde-12	DEAD-box ATP-dependent RNA helicase rde-12 OS=Caenorhabditis elegans GN=rde-12 PE=1 SV=4 - [RDE12_CAEEL]	959	103.77	7.2251	1	16	642.846	20.23	16	30
O44145	perm-2	PERMeable eggshell OS=Caenorhabditis elegans GN=perm-2 PE=1 SV=2 - [O44145_CAEEL]	203	22.4397	8.45557	1	1	641.383	5.42	1	18
Q8WQB4	CELE_Y105E8A.8	Uncharacterized protein OS=Caenorhabditis elegans GN=CELE_Y105E8A.8 PE=1 SV=1 - [Q8WQB4_CAEEL]	449	50.2658	5.65576	1	11	641.255	33.18	11	21
Q21086	nst-1	Guanine nucleotide-binding protein-like 3 homolog OS=Caenorhabditis elegans GN=nst-1 PE=3 SV=1 - [GNL3_CAEEL]	556	62.3001	9.36377	1	15	638.24	25.36	15	32
O45168	ifc-1	Intermediate filament protein ifc-1 OS=Caenorhabditis elegans GN=ifc-1 PE=3 SV=2 - [IFC1_CAEEL]	500	55.8343	7.02002	1	12	636.15	30.4	15	27
P34339	egl-45	Eukaryotic translation initiation factor 3 subunit A OS=Caenorhabditis elegans GN=egl-45 PE=3 SV=1 - [EIF3A_CAEEL]	1076	124.332	9.0415	1	16	634.243	16.82	16	26
Q10454	F46H5.3	Probable arginine kinase F46H5.3 OS=Caenorhabditis elegans GN=F46H5.3 PE=3 SV=2 - [KARG1_CAEEL]	396	44.1396	7.25439	1	11	628.907	33.33	11	19
P91871	fasn-1	Fatty Acid SyNthase OS=Caenorhabditis elegans GN=fasn-1 PE=1 SV=2 - [P91871_CAEEL]	2613	289.041	6.0874	1	23	624.989	9.57	23	31
Q18066	dim-1	Disorganized muscle protein 1 OS=Caenorhabditis elegans GN=dim-1 PE=1 SV=3 - [DIM_CAEEL]	640	71.8049	7.95752	1	12	624.273	23.28	12	17
Q21966	asp-4	ASpartyl Protease OS=Caenorhabditis elegans GN=asp-4 PE=1 SV=1 - [Q21966_CAEEL]	444	49.2458	6.55127	1	9	623.304	21.85	9	18
Q09450	C05C10.3	Probable succinyl-CoA:3-ketoacid coenzyme A transferase, mitochondrial OS=Caenorhabditis elegans GN=C05C10.3 PE=3 SV=1 - [SCOT_CAEEL]	521	56.0781	8.22119	1	11	622.681	30.71	11	19
P52821	rps-25	40S ribosomal protein S25 OS=Caenorhabditis elegans GN=rps-25 PE=3 SV=1 - [RS25_CAEEL]	117	12.9042	10.0669	1	8	622.269	48.72	8	15
Q17832	vgln-1	ViGiLN homolog OS=Caenorhabditis elegans GN=vgln-1 PE=1 SV=2 - [Q17832_CAEEL]	1220	134.262	6.80029	3	22	617.316	17.95	22	31
P53596	C05G5.4	Probable succinyl-CoA ligase [ADP/GDP-forming] subunit alpha, mitochondrial OS=Caenorhabditis elegans GN=C05G5.4 PE=3 SV=1 - [SUCA_CAEEL]	322	33.7765	8.99756	1	12	616.71	38.82	12	20
O76360	egl-4	cGMP-dependent protein kinase egl-4 OS=Caenorhabditis elegans GN=egl-4 PE=1 SV=2 - [EGL4_CAEEL]	780	86.6875	7.81104	8	19	616.293	26.67	19	31
Q27389	rpl-16	60S ribosomal protein L13a OS=Caenorhabditis elegans GN=rpl-16 PE=2 SV=1 - [RL13A_CAEEL]	202	22.9797	10.7554	1	13	611.755	46.04	13	26
Q22347	acdh-10	Probable medium-chain specific acyl-CoA dehydrogenase 10, mitochondrial OS=Caenorhabditis elegans GN=acdh-10 PE=2 SV=1 - [ACADM_CAEEL]	417	44.7898	8.17725	2	8	609.629	26.86	8	17
Q23050	clik-1	CaLponIn-liKe proteins OS=Caenorhabditis elegans GN=clik-1 PE=1 SV=1 - [Q23050_CAEEL]	406	44.3405	5.38916	2	13	609.16	49.01	13	25
Q1XFY9	rps-24	Ribosomal Protein, Small subunit OS=Caenorhabditis elegans GN=rps-24 PE=1 SV=1 - [Q1XFY9_CAEEL]	131	14.8625	10.7114	1	7	606.794	35.88	7	18
Q9XVS2	C25A1.4	Uncharacterized protein OS=Caenorhabditis elegans GN=C25A1.4 PE=1 SV=1 - [Q9XVS2_CAEEL]	454	49.314	9.30518	1	13	605.758	28.41	13	21
Q17489	unc-44	Uncharacterized protein OS=Caenorhabditis elegans GN=unc-44 PE=1 SV=2 - [Q17489_CAEEL]	317	34.1697	4.64014	1	7	595.436	36.28	9	17
O45599	cbd-1	Chitin-Binding Domain protein OS=Caenorhabditis elegans GN=cbd-1 PE=1 SV=2 - [O45599_CAEEL]	1319	144.103	4.66553	1	8	593.848	7.81	8	17
Q9BKU3	CELE_Y37E3.10	Uncharacterized protein OS=Caenorhabditis elegans GN=CELE_Y37E3.10 PE=1 SV=2 - [Q9BKU3_CAEEL]	342	38.8744	4.76709	1	12	592.96	44.15	12	20
Q18074	C18B2.3	Uncharacterized protein OS=Caenorhabditis elegans GN=C18B2.3 PE=1 SV=2 - [Q18074_CAEEL]	236	26.6183	10.1401	1	9	592.194	56.36	9	17
Q19057	acdh-12	Acyl CoA DeHydrogenase OS=Caenorhabditis elegans GN=acdh-12 PE=1 SV=1 - [Q19057_CAEEL]	613	66.13	8.44092	2	13	592.106	26.92	13	22
Q19020	dhc-1	Dynein heavy chain, cytoplasmic OS=Caenorhabditis elegans GN=dhc-1 PE=1 SV=1 - [DYHC_CAEEL]	4568	521.249	6.26514	1	27	591.186	6.17	27	33
Q9U2G0	Y46G5A.4	Putative U5 small nuclear ribonucleoprotein 200 kDa helicase OS=Caenorhabditis elegans GN=Y46G5A.4 PE=3 SV=1 - [U520_CAEEL]	2145	243.676	6.21436	1	19	591.166	8.72	19	30
G5EEZ4	3E324	3E324 OS=Caenorhabditis elegans GN=3E324 PE=1 SV=1 - [G5EEZ4_CAEEL]	383	43.192	4.77979	1	11	586.1	33.94	11	15
O01159	rsp-7	Probable splicing factor, arginine/serine-rich 7 OS=Caenorhabditis elegans GN=rsp-7 PE=3 SV=3 - [RSP7_CAEEL]	452	52.647	9.92041	1	8	583.588	20.13	8	26
P48162	rpl-25.1	60S ribosomal protein L23a 1 OS=Caenorhabditis elegans GN=rpl-25.1 PE=3 SV=1 - [R23A1_CAEEL]	147	16.6863	10.6382	1	6	582.702	48.98	8	23
Q95XM9	ddx-27	DEAD boX helicase homolog OS=Caenorhabditis elegans GN=ddx-27 PE=1 SV=2 - [Q95XM9_CAEEL]	739	82.4261	9.1001	1	11	582.321	17.46	11	22
O44411	nog-1	Nucleolar GTP-binding protein 1 OS=Caenorhabditis elegans GN=nog-1 PE=1 SV=1 - [NOG1_CAEEL]	681	78.4372	9.02686	3	17	582.059	24.38	17	31
G5EFG4	abcf-2	ABC transporter, class F OS=Caenorhabditis elegans GN=abcf-2 PE=1 SV=1 - [G5EFG4_CAEEL]	622	70.3348	6.771	2	16	580.208	22.35	16	26
G5EGR6	alg-1	Protein argonaute OS=Caenorhabditis elegans GN=alg-1 PE=1 SV=1 - [G5EGR6_CAEEL]	1002	110.864	9.1001	3	9	572.232	16.07	14	29
Q965K2	CELE_F53H1.1	Uncharacterized protein OS=Caenorhabditis elegans GN=CELE_F53H1.1 PE=1 SV=1 - [Q965K2_CAEEL]	970	109.837	7.40088	5	14	572.07	15.36	14	26
Q09422	pgam-5	Serine/threonine-protein phosphatase Pgam5, mitochondrial OS=Caenorhabditis elegans GN=pgam-5 PE=3 SV=2 - [PGAM5_CAEEL]	284	32.4698	8.89502	1	9	571.627	33.45	9	24
H2L2C9	atn-1	AcTiniN OS=Caenorhabditis elegans GN=atn-1 PE=1 SV=1 - [H2L2C9_CAEEL]	849	98.6242	6.31592	4	24	569.778	27.56	24	31
Q19877	rps-23	40S ribosomal protein S23 OS=Caenorhabditis elegans GN=rps-23 PE=3 SV=1 - [RS23_CAEEL]	143	15.8647	10.4771	1	5	565.051	33.57	5	18
Q20228	rps-9	40S ribosomal protein S9 OS=Caenorhabditis elegans GN=rps-9 PE=3 SV=1 - [RS9_CAEEL]	189	21.9433	10.521	1	15	562.439	48.68	15	34
A7LPE6	gpdh-2	Glycerol-3-phosphate dehydrogenase [NAD(+)] OS=Caenorhabditis elegans GN=gpdh-2 PE=1 SV=1 - [A7LPE6_CAEEL]	360	39.2561	6.45557	4	10	556.166	24.17	10	18
Q9GYP5	CELE_F46C8.3	Uncharacterized protein OS=Caenorhabditis elegans GN=CELE_F46C8.3 PE=1 SV=2 - [Q9GYP5_CAEEL]	201	22.9382	8.646	1	7	555.488	38.31	7	20
Q9N4Y8	nuo-5	NADH Ubiquinone Oxidoreductase OS=Caenorhabditis elegans GN=nuo-5 PE=1 SV=1 - [Q9N4Y8_CAEEL]	729	79.3067	6.68311	3	19	548.31	30.45	19	25
O01530	asp-6	Aspartic protease 6 OS=Caenorhabditis elegans GN=asp-6 PE=3 SV=1 - [ASP6_CAEEL]	389	41.4938	5.99854	1	4	547.966	17.22	4	9
Q94261	cif-1	COP9/Signalosome and eIF3 complex-shared subunit 1 OS=Caenorhabditis elegans GN=cif-1 PE=1 SV=1 - [EIF3M_CAEEL]	390	44.056	5.75732	1	12	546.818	30	12	19
Q9U238	trap-4	TRanslocon-Associated Protein OS=Caenorhabditis elegans GN=trap-4 PE=1 SV=1 - [Q9U238_CAEEL]	159	17.4049	7.35693	1	6	546.775	57.23	6	13
Q19749	F23B12.5	Dihydrolipoyllysine-residue acetyltransferase component of pyruvate dehydrogenase complex, mitochondrial OS=Caenorhabditis elegans GN=F23B12.5 PE=1 SV=1 - [ODP2_CAEEL]	507	53.4336	8.25049	1	9	544.821	26.04	9	17
P30642	eif-3.D	Eukaryotic translation initiation factor 3 subunit D OS=Caenorhabditis elegans GN=eif-3.D PE=1 SV=1 - [EIF3D_CAEEL]	570	64.249	8.20654	1	12	542.32	28.95	12	19
Q93353	idhb-1	Probable isocitrate dehydrogenase [NAD] subunit beta, mitochondrial OS=Caenorhabditis elegans GN=idhb-1 PE=3 SV=1 - [IDH3B_CAEEL]	379	41.5266	7.86963	1	12	542.202	40.63	12	18
Q9N5R9	spt-16	FACT complex subunit spt-16 OS=Caenorhabditis elegans GN=spt-16 PE=3 SV=1 - [SPT16_CAEEL]	1030	116.793	5.77002	2	18	540.324	19.9	18	26
Q86NC2	nuo-2	NADH Ubiquinone Oxidoreductase OS=Caenorhabditis elegans GN=nuo-2 PE=1 SV=1 - [Q86NC2_CAEEL]	268	30.7838	8.47021	2	11	538.751	48.51	11	17
O01761	unc-89	Muscle M-line assembly protein unc-89 OS=Caenorhabditis elegans GN=unc-89 PE=1 SV=3 - [UNC89_CAEEL]	8081	893.7	5.56689	1	22	538.259	3.13	22	30
P11141	hsp-6	Heat shock 70 kDa protein F, mitochondrial OS=Caenorhabditis elegans GN=hsp-6 PE=1 SV=2 - [HSP7F_CAEEL]	657	70.8007	6.20166	1	6	535.873	12.94	6	12
Q9GZH4	ribo-1	Dolichyl-diphosphooligosaccharide--protein glycosyltransferase subunit 1 OS=Caenorhabditis elegans GN=ribo-1 PE=3 SV=2 - [RPN1_CAEEL]	586	65.6965	6.93213	1	22	535.554	41.81	22	34
Q9XTT9	rpt-6	Proteasome Regulatory Particle, ATPase-like OS=Caenorhabditis elegans GN=rpt-6 PE=1 SV=1 - [Q9XTT9_CAEEL]	416	46.2203	8.82178	2	4	532.55	26.68	9	16
G4SPY1	Y71G10AL.1	Uncharacterized protein OS=Caenorhabditis elegans GN=Y71G10AL.1 PE=1 SV=2 - [G4SPY1_CAEEL]	676	75.572	5.78271	2	12	529.107	22.63	12	28
I7FW32	rab-1	Rab-1 (Fragment) OS=Caenorhabditis elegans GN=rab-1 PE=2 SV=1 - [I7FW32_CAEEL]	204	22.4003	5.70654	15	5	528.493	51.96	6	15
P46563	aldo-2	Fructose-bisphosphate aldolase 2 OS=Caenorhabditis elegans GN=aldo-2 PE=2 SV=1 - [ALF2_CAEEL]	366	38.8223	7.88428	2	15	524.516	47.27	15	20
Q86S66	icd-2	Nascent polypeptide-associated complex subunit alpha OS=Caenorhabditis elegans GN=icd-2 PE=1 SV=1 - [NACA_CAEEL]	197	22.0643	5.05908	2	4	523.182	53.81	9	19
Q9N3F7	CELE_Y53G8AR.9	Uncharacterized protein OS=Caenorhabditis elegans GN=CELE_Y53G8AR.9 PE=1 SV=1 - [Q9N3F7_CAEEL]	315	35.0545	7.7085	1	12	523.124	41.59	12	28
O17071	rpt-4	Probable 26S protease regulatory subunit 10B OS=Caenorhabditis elegans GN=rpt-4 PE=1 SV=2 - [PRS10_CAEEL]	406	45.83	7.6792	1	11	521.035	33.25	11	17
O02141	C46G7.2	Uncharacterized protein OS=Caenorhabditis elegans GN=C46G7.2 PE=1 SV=1 - [O02141_CAEEL]	250	29.996	9.67139	1	13	520.934	62	13	23
Q9BKU4	phb-1	Mitochondrial prohibitin complex protein 1 OS=Caenorhabditis elegans GN=phb-1 PE=1 SV=1 - [PHB1_CAEEL]	275	29.97	7.56201	1	8	511.914	32.73	8	14
Q9NA74	CELE_Y57A10A.26	Uncharacterized protein OS=Caenorhabditis elegans GN=CELE_Y57A10A.26 PE=1 SV=1 - [Q9NA74_CAEEL]	269	30.7127	7.97217	1	12	510.285	49.07	12	18
Q22054	rps-16	40S ribosomal protein S16 OS=Caenorhabditis elegans GN=rps-16 PE=1 SV=3 - [RS16_CAEEL]	144	16.306	10.3013	1	14	508.198	63.19	14	25
Q9TZL8	pfk-1	ATP-dependent 6-phosphofructokinase 1 OS=Caenorhabditis elegans GN=pfk-1 PE=3 SV=2 - [PFKA1_CAEEL]	814	89.6766	6.68311	1	15	506.758	22.48	15	20
D5MCQ1	sup-26	SUPpressor OS=Caenorhabditis elegans GN=sup-26 PE=1 SV=1 - [D5MCQ1_CAEEL]	354	38.8453	8.47021	14	6	506.212	30.51	6	13
Q19753	F23B12.7	Uncharacterized protein F23B12.7 OS=Caenorhabditis elegans GN=F23B12.7 PE=3 SV=1 - [YU0O_CAEEL]	953	108.356	5.59229	1	15	505.635	18.78	15	25
Q9N4J8	cct-3	T-complex protein 1 subunit gamma OS=Caenorhabditis elegans GN=cct-3 PE=1 SV=3 - [Q9N4J8_CAEEL]	543	60.4187	7.85498	1	11	504.709	21.36	11	19
P27604	ahcy-1	Adenosylhomocysteinase OS=Caenorhabditis elegans GN=ahcy-1 PE=3 SV=1 - [SAHH_CAEEL]	437	47.5054	6.25244	1	13	501.249	35.7	13	18
Q9GUF2	acp-6	ACid Phosphatase family OS=Caenorhabditis elegans GN=acp-6 PE=1 SV=2 - [Q9GUF2_CAEEL]	381	43.002	8.38232	1	14	501.146	45.14	14	20
Q10051	prp-19	Pre-mRNA-processing factor 19 OS=Caenorhabditis elegans GN=prp-19 PE=3 SV=2 - [PRP19_CAEEL]	492	53.1752	6.06201	1	11	500.854	30.08	11	20
Q20684	lec-2	GaLECtin OS=Caenorhabditis elegans GN=lec-2 PE=1 SV=2 - [Q20684_CAEEL]	1245	131.857	4.37354	2	13	498.196	11.73	14	22
Q9N384	lec-6	Galectin OS=Caenorhabditis elegans GN=lec-6 PE=1 SV=1 - [Q9N384_CAEEL]	146	15.973	6.68311	3	6	496.391	50.68	6	13
Q2XMY4	CELE_W08G11.3	Uncharacterized protein OS=Caenorhabditis elegans GN=CELE_W08G11.3 PE=4 SV=1 - [Q2XMY4_CAEEL]	510	58.1466	6.22705	2	9	492.878	22.35	9	17
Q22370	ucr-2.2	Ubiquinol-Cytochrome c oxidoReductase complex OS=Caenorhabditis elegans GN=ucr-2.2 PE=1 SV=2 - [Q22370_CAEEL]	422	44.1857	9.05615	1	9	490.451	28.44	9	15
Q9XXD4	Y48A6B.3	Putative H/ACA ribonucleoprotein complex subunit 2-like protein OS=Caenorhabditis elegans GN=Y48A6B.3 PE=3 SV=1 - [NHP2_CAEEL]	163	18.0795	6.78564	1	6	489.934	36.81	6	20
Q9NA71	CELE_Y57A10A.31	Uncharacterized protein OS=Caenorhabditis elegans GN=CELE_Y57A10A.31 PE=1 SV=2 - [Q9NA71_CAEEL]	1180	136.373	6.44287	1	18	488.912	16.69	18	29
Q27511	htz-1	Histone H2A.V OS=Caenorhabditis elegans GN=htz-1 PE=2 SV=3 - [H2AV_CAEEL]	140	14.6601	10.6089	1	5	488.755	40.71	6	18
O02639	rpl-19	60S ribosomal protein L19 OS=Caenorhabditis elegans GN=rpl-19 PE=3 SV=1 - [RL19_CAEEL]	198	23.6372	11.3706	1	11	486.148	30.81	11	21
O01868	rpl-24.1	60S ribosomal protein L24 OS=Caenorhabditis elegans GN=rpl-24.1 PE=3 SV=1 - [RL24_CAEEL]	159	17.769	11.2681	1	8	482.801	33.33	8	20
O17157	C24H12.4	Uncharacterized protein OS=Caenorhabditis elegans GN=C24H12.4 PE=1 SV=2 - [O17157_CAEEL]	634	71.9318	9.27588	4	13	479.322	22.87	13	22
P50093	phb-2	Mitochondrial prohibitin complex protein 2 OS=Caenorhabditis elegans GN=phb-2 PE=1 SV=2 - [PHB2_CAEEL]	294	32.6473	9.74463	1	12	477.491	37.41	12	21
Q8MXS0	mca-3	Calcium-transporting ATPase OS=Caenorhabditis elegans GN=mca-3 PE=1 SV=1 - [Q8MXS0_CAEEL]	1137	124.518	5.84619	10	15	477.48	18.21	18	23
P47208	cct-4	T-complex protein 1 subunit delta OS=Caenorhabditis elegans GN=cct-4 PE=2 SV=1 - [TCPD_CAEEL]	540	58.3544	6.55127	1	9	473.914	20.93	9	19
P46502	rpt-3	Probable 26S protease regulatory subunit 6B OS=Caenorhabditis elegans GN=rpt-3 PE=3 SV=1 - [PRS6B_CAEEL]	414	46.3289	5.22412	1	10	473.422	30.92	10	17
Q9TZC4	pat-4	Integrin-linked protein kinase homolog pat-4 OS=Caenorhabditis elegans GN=pat-4 PE=1 SV=1 - [ILKH_CAEEL]	466	52.2262	6.7124	1	13	471.765	31.33	13	23
O62518	ZK795.3	Brix domain-containing protein ZK795.3 OS=Caenorhabditis elegans GN=ZK795.3 PE=3 SV=1 - [YHPK_CAEEL]	292	33.9313	8.5874	1	6	470.67	26.37	6	9
O45148	dlst-1	DihydroLipoamide S-SuccinylTransferase OS=Caenorhabditis elegans GN=dlst-1 PE=1 SV=2 - [O45148_CAEEL]	463	49.782	9.08545	1	5	468.209	13.17	5	11
G5EFS2	msi-1	MuSashI (Fly neural) family OS=Caenorhabditis elegans GN=msi-1 PE=1 SV=1 - [G5EFS2_CAEEL]	320	35.4793	7.57666	1	4	468.12	18.75	4	10
Q93168	C01G10.8	Uncharacterized protein OS=Caenorhabditis elegans GN=C01G10.8 PE=1 SV=1 - [Q93168_CAEEL]	342	38.5435	5.78271	1	10	463.039	39.47	10	14
Q20363	sip-1	Stress-induced protein 1 OS=Caenorhabditis elegans GN=sip-1 PE=1 SV=1 - [SIP1_CAEEL]	159	17.8279	8.08936	1	8	461.787	63.52	8	15
P16356	ama-1	DNA-directed RNA polymerase II subunit RPB1 OS=Caenorhabditis elegans GN=ama-1 PE=1 SV=3 - [RPB1_CAEEL]	1856	204.395	6.7417	1	9	460.991	5.66	10	23
O44781	CELE_F33D11.10	Uncharacterized protein OS=Caenorhabditis elegans GN=CELE_F33D11.10 PE=3 SV=1 - [O44781_CAEEL]	399	45.4526	6.03662	3	13	455.396	36.84	14	19
Q18990	pyr-1	PYRimidine biosynthesis OS=Caenorhabditis elegans GN=pyr-1 PE=1 SV=2 - [Q18990_CAEEL]	2198	242.428	6.41748	1	12	455.212	6.28	12	18
Q23120	rsp-2	Probable splicing factor, arginine/serine-rich 2 OS=Caenorhabditis elegans GN=rsp-2 PE=3 SV=1 - [RSP2_CAEEL]	281	32.4015	11.2241	1	11	454.272	30.25	11	23
Q18212	hel-1	Spliceosome RNA helicase DDX39B homolog OS=Caenorhabditis elegans GN=hel-1 PE=2 SV=1 - [DX39B_CAEEL]	425	48.4616	5.79541	1	10	450.817	26.35	10	16
Q19869	rpl-26	60S ribosomal protein L26 OS=Caenorhabditis elegans GN=rpl-26 PE=3 SV=1 - [RL26_CAEEL]	142	16.0649	11.2827	1	8	450.25	38.73	8	19
Q19969	ima-3	Importin subunit alpha-3 OS=Caenorhabditis elegans GN=ima-3 PE=1 SV=2 - [IMA3_CAEEL]	514	56.1275	4.83057	2	4	443.927	15.18	4	12
Q9XTZ2	rsp-8	SR Protein (Splicing factor) OS=Caenorhabditis elegans GN=rsp-8 PE=1 SV=1 - [Q9XTZ2_CAEEL]	309	32.6625	10.7847	2	15	442.681	43.69	15	23
Q9XVE9	rpl-14	Ribosomal Protein, Large subunit OS=Caenorhabditis elegans GN=rpl-14 PE=1 SV=1 - [Q9XVE9_CAEEL]	135	15.3427	11.2681	3	10	440.454	57.04	10	16
Q9XU45	B0379.1	Uncharacterized protein OS=Caenorhabditis elegans GN=B0379.1 PE=1 SV=1 - [Q9XU45_CAEEL]	212	24.7634	9.49561	1	12	439.943	57.08	12	19
Q8IG31	prdx-2	PeRoxireDoXin OS=Caenorhabditis elegans GN=prdx-2 PE=1 SV=1 - [Q8IG31_CAEEL]	195	21.7711	5.8335	3	8	437.196	51.28	8	19
Q09236	C13B9.3	Probable coatomer subunit delta OS=Caenorhabditis elegans GN=C13B9.3 PE=3 SV=1 - [COPD_CAEEL]	515	56.611	5.92236	1	10	435.354	20	10	14
O01806	C44E4.4	Uncharacterized protein OS=Caenorhabditis elegans GN=C44E4.4 PE=1 SV=1 - [O01806_CAEEL]	396	43.6049	7.09326	1	8	435.15	26.26	8	10
G5EGT7	iffb-1	Eukaryotic translation initiation factor eIF5B OS=Caenorhabditis elegans GN=iffb-1 PE=1 SV=1 - [G5EGT7_CAEEL]	1074	120.344	5.69385	1	9	434.547	11.08	9	21
P50140	hsp-60	Chaperonin homolog Hsp-60, mitochondrial OS=Caenorhabditis elegans GN=hsp-60 PE=2 SV=2 - [CH60_CAEEL]	568	60.0638	5.40186	4	12	433.684	25	12	17
Q8T3D2	CELE_T08G11.1	Uncharacterized protein OS=Caenorhabditis elegans GN=CELE_T08G11.1 PE=1 SV=1 - [Q8T3D2_CAEEL]	3185	356.337	6.34131	2	15	431.565	4.74	15	21
H9G336	mlt-11	Uncharacterized protein OS=Caenorhabditis elegans GN=mlt-11 PE=1 SV=1 - [H9G336_CAEEL]	2527	275.382	5.59229	4	7	431.404	4.27	7	13
Q27274	rop-1	60 kDa SS-A/Ro ribonucleoprotein homolog OS=Caenorhabditis elegans GN=rop-1 PE=2 SV=1 - [RO60_CAEEL]	643	72.7959	6.80029	1	13	430.024	26.28	14	22
P34255	B0303.3	Uncharacterized protein B0303.3 OS=Caenorhabditis elegans GN=B0303.3 PE=3 SV=1 - [YKA3_CAEEL]	448	47.8441	9.0708	1	13	428.611	30.8	13	19
O02640	mdh-2	Probable malate dehydrogenase, mitochondrial OS=Caenorhabditis elegans GN=mdh-2 PE=3 SV=1 - [MDHM_CAEEL]	341	35.0981	9.37842	1	12	427.908	42.82	12	15
A0A0K3AYH6	fln-2	FiLamiN (Actin binding protein) homolog OS=Caenorhabditis elegans GN=fln-2 PE=1 SV=1 - [A0A0K3AYH6_CAEEL]	2654	290.694	6.7417	18	12	426.238	5.39	12	19
Q9U2D9	gsy-1	Glycogen [starch] synthase OS=Caenorhabditis elegans GN=gsy-1 PE=1 SV=1 - [GYS_CAEEL]	672	76.4101	6.25244	1	12	426.053	18.15	12	22
Q7JL40	pyk-1	Pyruvate kinase OS=Caenorhabditis elegans GN=pyk-1 PE=1 SV=1 - [Q7JL40_CAEEL]	531	57.3646	6.62451	8	13	425.328	27.68	13	22
Q94402	ZK265.6	Nucleolar protein 16 OS=Caenorhabditis elegans GN=ZK265.6 PE=3 SV=1 - [NOP16_CAEEL]	189	22.2447	9.81787	1	8	424.324	46.56	8	16
Q21059	hch-1	Zinc metalloproteinase nas-34 OS=Caenorhabditis elegans GN=hch-1 PE=1 SV=1 - [NAS34_CAEEL]	605	66.2165	7.7085	1	10	423.947	13.39	10	18
P34466	clu-1	Clustered mitochondria protein homolog OS=Caenorhabditis elegans GN=clu-1 PE=3 SV=1 - [CLU_CAEEL]	1247	139.834	6.17627	2	17	423.442	16.36	17	19
G5EEP9	frm-1	FERM domain (Protein4.1-ezrin-radixin-moesin) family OS=Caenorhabditis elegans GN=frm-1 PE=1 SV=1 - [G5EEP9_CAEEL]	4530	512.171	6.43018	4	12	421.085	3.55	12	17
Q9N4F3	apb-1	AP complex subunit beta OS=Caenorhabditis elegans GN=apb-1 PE=1 SV=2 - [Q9N4F3_CAEEL]	955	105.186	5.33838	3	15	420.479	17.38	15	19
O44512	isp-1	Cytochrome b-c1 complex subunit Rieske, mitochondrial OS=Caenorhabditis elegans GN=isp-1 PE=1 SV=1 - [O44512_CAEEL]	276	29.691	8.63135	1	6	420.033	22.1	6	13
P90992	misc-1	MItochondrial Solute Carrier OS=Caenorhabditis elegans GN=misc-1 PE=1 SV=2 - [P90992_CAEEL]	306	33.2864	9.75928	1	7	420.007	26.8	7	13
Q8WQA8	rps-20	Ribosomal Protein, Small subunit OS=Caenorhabditis elegans GN=rps-20 PE=1 SV=1 - [Q8WQA8_CAEEL]	117	13.2262	9.83252	1	5	419.394	38.46	5	13
P17329	gpd-2	Glyceraldehyde-3-phosphate dehydrogenase 2 OS=Caenorhabditis elegans GN=gpd-2 PE=3 SV=2 - [G3P2_CAEEL]	341	36.4328	7.26904	2	7	419.134	39.59	10	14
P35603	dpy-23	AP-2 complex subunit mu OS=Caenorhabditis elegans GN=dpy-23 PE=2 SV=2 - [AP2M_CAEEL]	441	50.2682	9.49561	1	18	418.916	46.03	18	23
Q9TXI4	CELE_F23C8.5	Uncharacterized protein OS=Caenorhabditis elegans GN=CELE_F23C8.5 PE=1 SV=2 - [Q9TXI4_CAEEL]	255	27.623	8.5874	2	7	417.834	39.61	7	9
Q9U365	ngp-1	Nuclear/nucleolar GTP-binding Protein family OS=Caenorhabditis elegans GN=ngp-1 PE=1 SV=2 - [Q9U365_CAEEL]	592	66.4978	9.02686	3	14	416.608	25.34	14	22
P49041	rps-5	40S ribosomal protein S5 OS=Caenorhabditis elegans GN=rps-5 PE=3 SV=1 - [RS5_CAEEL]	210	23.1403	9.80322	1	7	416.071	33.81	7	17
Q21443	lmn-1	Lamin-1 OS=Caenorhabditis elegans GN=lmn-1 PE=1 SV=2 - [LMN1_CAEEL]	566	64.0456	5.59229	1	13	414.358	26.86	13	18
Q9XWT3	CELE_Y62H9A.6	Uncharacterized protein OS=Caenorhabditis elegans GN=CELE_Y62H9A.6 PE=1 SV=1 - [Q9XWT3_CAEEL]	181	19.5216	5.71924	1	10	414.161	35.91	10	21
P90860	CELE_F36A2.7	Uncharacterized protein OS=Caenorhabditis elegans GN=CELE_F36A2.7 PE=1 SV=1 - [P90860_CAEEL]	167	19.5272	9.62744	1	4	413.882	32.93	4	13
Q86NC1	CELE_T22F3.3	Alpha-1,4 glucan phosphorylase OS=Caenorhabditis elegans GN=CELE_T22F3.3 PE=1 SV=1 - [Q86NC1_CAEEL]	846	97.6194	5.77002	2	13	411.97	19.62	13	17
P41988	cct-1	T-complex protein 1 subunit alpha OS=Caenorhabditis elegans GN=cct-1 PE=3 SV=2 - [TCPA_CAEEL]	549	58.7663	6.49365	1	12	409.084	24.95	12	19
Q22498	T14G10.5	Probable coatomer subunit gamma OS=Caenorhabditis elegans GN=T14G10.5 PE=3 SV=1 - [COPG_CAEEL]	870	96.2414	5.5542	4	13	407.192	15.75	13	19
Q9TYL9	copb-1	Coatomer subunit beta OS=Caenorhabditis elegans GN=copb-1 PE=1 SV=1 - [Q9TYL9_CAEEL]	971	107.462	5.69385	1	14	406.33	20.39	14	19
P49180	rpl-33	60S ribosomal protein L35a OS=Caenorhabditis elegans GN=rpl-33 PE=1 SV=3 - [RL35A_CAEEL]	124	13.7596	11.2534	1	10	406.017	62.1	10	22
Q09475	C28H8.3	Uncharacterized helicase C28H8.3 OS=Caenorhabditis elegans GN=C28H8.3 PE=3 SV=2 - [YP93_CAEEL]	1714	193.974	6.78564	1	11	405.951	7.23	11	23
O76371	rpt-5	Proteasome Regulatory Particle, ATPase-like OS=Caenorhabditis elegans GN=rpt-5 PE=1 SV=1 - [O76371_CAEEL]	430	48.0958	5.2876	1	9	405.703	29.07	9	15
Q21000	myo-5	MYOsin heavy chain structural genes OS=Caenorhabditis elegans GN=myo-5 PE=1 SV=1 - [Q21000_CAEEL]	1974	226.859	6.21436	2	8	404.904	8.26	13	16
P91913	rla-1	60S acidic ribosomal protein P1 OS=Caenorhabditis elegans GN=rla-1 PE=3 SV=2 - [RLA1_CAEEL]	111	11.2766	4.32275	1	2	404.42	62.16	3	10
Q9N5K1	sacy-1	Suppressor of ACY-4 sterility OS=Caenorhabditis elegans GN=sacy-1 PE=1 SV=1 - [Q9N5K1_CAEEL]	630	70.4265	6.45557	2	11	403.826	24.44	12	16
P91495	npp-12	Nuclear Pore complex Protein OS=Caenorhabditis elegans GN=npp-12 PE=1 SV=1 - [P91495_CAEEL]	1847	199.516	6.82959	1	16	403.473	10.29	16	21
G5EFV4	hmg-1.1	HMG OS=Caenorhabditis elegans GN=hmg-1.1 PE=1 SV=1 - [G5EFV4_CAEEL]	95	10.6067	10.228	1	8	402.222	52.63	8	18
Q22781	acdh-7	Acyl CoA DeHydrogenase OS=Caenorhabditis elegans GN=acdh-7 PE=1 SV=2 - [Q22781_CAEEL]	412	44.5883	7.57666	1	7	401.164	29.85	7	9
Q19302	CELE_F10E7.5	Uncharacterized protein OS=Caenorhabditis elegans GN=CELE_F10E7.5 PE=1 SV=1 - [Q19302_CAEEL]	220	25.2422	9.5835	1	7	401.142	36.82	7	10
P91240	srpa-72	Signal recognition particle subunit SRP72 OS=Caenorhabditis elegans GN=srpa-72 PE=3 SV=2 - [SRP72_CAEEL]	635	71.3703	8.52881	1	10	400.117	19.69	10	13
Q9N3H3	CELE_Y53G8AL.2	Uncharacterized protein OS=Caenorhabditis elegans GN=CELE_Y53G8AL.2 PE=1 SV=2 - [Q9N3H3_CAEEL]	431	48.2236	9.18799	1	10	399.813	30.16	10	16
Q86NC8	CELE_F55F8.2	Uncharacterized protein OS=Caenorhabditis elegans GN=CELE_F55F8.2 PE=1 SV=1 - [Q86NC8_CAEEL]	579	65.6429	9.30518	2	12	399.331	20.55	12	15
C9IY22	CELE_ZK1058.9	Uncharacterized protein OS=Caenorhabditis elegans GN=CELE_ZK1058.9 PE=1 SV=1 - [C9IY22_CAEEL]	224	26.6519	9.74463	2	10	398.531	50	10	18
P48158	rpl-23	60S ribosomal protein L23 OS=Caenorhabditis elegans GN=rpl-23 PE=3 SV=1 - [RL23_CAEEL]	140	14.945	10.5356	1	8	396.893	50.71	8	15
Q3S1J5	uba-1	UBA (Human ubiquitin) related OS=Caenorhabditis elegans GN=uba-1 PE=1 SV=1 - [Q3S1J5_CAEEL]	1028	114.883	5.24951	3	11	395.633	12.06	11	16
Q21210	CELE_K04C2.2	Uncharacterized protein OS=Caenorhabditis elegans GN=CELE_K04C2.2 PE=1 SV=1 - [Q21210_CAEEL]	990	109.787	5.50342	1	12	393.449	15.15	12	15
Q09497	rsu-1	Ras SUppressor homolog OS=Caenorhabditis elegans GN=rsu-1 PE=1 SV=1 - [Q09497_CAEEL]	268	30.5012	6.81494	1	8	391.426	44.4	8	15
G5EEV5	pud-3	5C820 OS=Caenorhabditis elegans GN=pud-3 PE=1 SV=1 - [G5EEV5_CAEEL]	172	19.4248	8.1333	1	5	390.925	48.84	5	8
P52274	tba-8	Tubulin alpha-8 chain OS=Caenorhabditis elegans GN=tba-8 PE=3 SV=2 - [TBA8_CAEEL]	452	50.4588	5.26221	1	4	390.533	19.47	6	12
Q9TZ65	CELE_F56F11.4	Uncharacterized protein OS=Caenorhabditis elegans GN=CELE_F56F11.4 PE=1 SV=2 - [Q9TZ65_CAEEL]	411	45.661	8.6167	2	1	389.805	20.44	7	12
V6CM19	col-45	COLlagen OS=Caenorhabditis elegans GN=col-45 PE=4 SV=1 - [V6CM19_CAEEL]	258	25.1808	6.3667	2	3	389.511	13.18	3	9
P34462	vha-14	V-type proton ATPase subunit D OS=Caenorhabditis elegans GN=vha-14 PE=3 SV=1 - [VATD_CAEEL]	257	28.7682	9.21729	1	7	387.223	43.19	7	14
P61866	rpl-12	60S ribosomal protein L12 OS=Caenorhabditis elegans GN=rpl-12 PE=3 SV=1 - [RL12_CAEEL]	165	17.8198	9.42236	1	6	386.467	33.33	6	15
Q2XN16	kars-1	Lysine--tRNA ligase OS=Caenorhabditis elegans GN=kars-1 PE=1 SV=1 - [Q2XN16_CAEEL]	514	58.5488	6.03662	3	11	386.052	21.6	11	20
Q93873	gas-1	Probable NADH dehydrogenase [ubiquinone] iron-sulfur protein 2, mitochondrial OS=Caenorhabditis elegans GN=gas-1 PE=3 SV=2 - [NDUS2_CAEEL]	482	54.5276	6.49365	2	9	383.594	23.03	9	20
P91374	rpl-15	60S ribosomal protein L15 OS=Caenorhabditis elegans GN=rpl-15 PE=3 SV=1 - [RL15_CAEEL]	204	24.1102	11.6343	1	10	379.873	37.25	10	20
G5EEH6	ivd-1	IsoValeryl-CoA Dehydrogenase OS=Caenorhabditis elegans GN=ivd-1 PE=1 SV=1 - [G5EEH6_CAEEL]	419	45.613	8.01611	1	8	379.34	21.96	8	12
Q22253	rpn-9	Proteasome Regulatory Particle, Non-ATPase-like OS=Caenorhabditis elegans GN=rpn-9 PE=1 SV=1 - [Q22253_CAEEL]	387	44.1321	6.75635	1	9	379.22	32.3	9	12
G5EGL2	CELE_T28D6.6	Uncharacterized protein OS=Caenorhabditis elegans GN=CELE_T28D6.6 PE=1 SV=1 - [G5EGL2_CAEEL]	366	40.783	8.90967	2	5	378.084	21.04	5	9
I2HAJ2	rpl-30	Ribosomal Protein, Large subunit OS=Caenorhabditis elegans GN=rpl-30 PE=1 SV=1 - [I2HAJ2_CAEEL]	94	10.1813	8.83643	2	5	376.52	35.11	5	13
Q20206	rps-11	Ribosomal Protein, Small subunit OS=Caenorhabditis elegans GN=rps-11 PE=1 SV=1 - [Q20206_CAEEL]	155	17.7336	10.4624	1	10	374.234	52.26	10	19
O17915	ran-1	GTP-binding nuclear protein ran-1 OS=Caenorhabditis elegans GN=ran-1 PE=1 SV=1 - [RAN_CAEEL]	215	24.2384	7.44482	2	7	373.963	47.91	7	15
O62415	lys-1	LYSozyme OS=Caenorhabditis elegans GN=lys-1 PE=1 SV=1 - [O62415_CAEEL]	298	32.3593	5.68115	1	4	373.62	18.46	4	8
Q22961	CELE_F25B4.5	Uncharacterized protein OS=Caenorhabditis elegans GN=CELE_F25B4.5 PE=1 SV=2 - [Q22961_CAEEL]	710	82.7384	7.86963	1	7	373.559	11.69	7	14
P49181	rpl-36	60S ribosomal protein L36 OS=Caenorhabditis elegans GN=rpl-36 PE=1 SV=3 - [RL36_CAEEL]	104	11.8768	11.6489	1	10	372.843	45.19	10	18
Q65ZK0	rars-1	Arginyl(R) Amino-acyl tRNA Synthetase OS=Caenorhabditis elegans GN=rars-1 PE=1 SV=1 - [Q65ZK0_CAEEL]	692	78.2563	7.44482	2	8	372.804	11.85	8	14
Q20748	atad-3	ATPase family AAA domain-containing protein 3 OS=Caenorhabditis elegans GN=atad-3 PE=3 SV=2 - [ATAD3_CAEEL]	595	67.1058	9.34912	1	7	372.585	15.46	7	15
Q22111	mmaa-1	Methylmalonic aciduria type A homolog, mitochondrial OS=Caenorhabditis elegans GN=mmaa-1 PE=3 SV=2 - [MMAA1_CAEEL]	399	44.1876	8.76318	1	6	371.55	21.8	6	10
O16785	pat-6	Paralyzed arrest at two-fold protein 6 OS=Caenorhabditis elegans GN=pat-6 PE=1 SV=1 - [PARV_CAEEL]	375	42.9748	6.43018	1	9	370.145	28.8	9	11
Q17967	pdi-1	Protein disulfide-isomerase 1 OS=Caenorhabditis elegans GN=pdi-1 PE=3 SV=1 - [PDI1_CAEEL]	485	53.4031	4.75439	1	11	370.11	27.22	11	15
Q9TYV5	nol-1	NucleOLar protein OS=Caenorhabditis elegans GN=nol-1 PE=1 SV=2 - [Q9TYV5_CAEEL]	664	73.8592	9.12939	2	6	368.545	9.79	6	13
P0CG71	ubq-1	Polyubiquitin-A OS=Caenorhabditis elegans GN=ubq-1 PE=3 SV=1 - [UBIQ1_CAEEL]	838	93.9297	7.38623	3	6	368.026	51.19	6	20
Q95YD8	idhg-2	Isocitrate dehydrogenase [NAD] subunit, mitochondrial OS=Caenorhabditis elegans GN=idhg-2 PE=1 SV=1 - [Q95YD8_CAEEL]	373	40.824	7.38623	1	6	367.559	28.15	8	15
Q09973	C17G10.1	Uncharacterized protein OS=Caenorhabditis elegans GN=C17G10.1 PE=1 SV=1 - [Q09973_CAEEL]	480	54.9606	5.8208	1	7	367.47	18.75	7	11
G5EET8	pud-1.2	Protein Up-regulated in Daf-2(Gf) OS=Caenorhabditis elegans GN=pud-1.2 PE=1 SV=1 - [G5EET8_CAEEL]	151	17.1735	6.80029	1	5	364.743	58.28	5	12
Q9XWC3	Y73F4A.2	DOMON domain-containing protein Y73F4A.2 OS=Caenorhabditis elegans GN=Y73F4A.2 PE=1 SV=1 - [DMON1_CAEEL]	168	18.8621	8.93896	1	3	363.88	35.71	3	8
Q21559	aly-3	Ref/ALY RNA export adaptor family OS=Caenorhabditis elegans GN=aly-3 PE=1 SV=1 - [Q21559_CAEEL]	240	25.6802	10.3159	1	10	363.359	42.08	10	12
G5EGB3	ragc-1	RAs-related GTP binding protein C homolog OS=Caenorhabditis elegans GN=ragc-1 PE=1 SV=1 - [G5EGB3_CAEEL]	338	38.8483	4.91943	2	8	362.967	25.15	8	14
Q9XXU9	vha-11	V-type proton ATPase subunit C OS=Caenorhabditis elegans GN=vha-11 PE=2 SV=1 - [VATC_CAEEL]	384	43.432	8.03076	1	15	362.91	38.02	15	16
Q18038	let-716	Uncharacterized protein OS=Caenorhabditis elegans GN=let-716 PE=1 SV=3 - [Q18038_CAEEL]	1743	192.141	7.6499	1	18	361.907	9.75	18	24
Q9N5A0	spe-5	Uncharacterized protein OS=Caenorhabditis elegans GN=spe-5 PE=1 SV=1 - [Q9N5A0_CAEEL]	501	55.9989	6.56592	1	1	361.866	13.77	4	11
P54073	F44G4.1	Brix domain-containing protein F44G4.1 OS=Caenorhabditis elegans GN=F44G4.1 PE=3 SV=4 - [YUY1_CAEEL]	384	45.1632	7.84033	1	9	359.805	26.3	9	13
Q9GZH5	rpn-1	Proteasome Regulatory Particle, Non-ATPase-like OS=Caenorhabditis elegans GN=rpn-1 PE=1 SV=1 - [Q9GZH5_CAEEL]	981	107.313	6.29053	1	12	358.128	13.66	12	17
Q9BLB6	mog-2	Probable U2 small nuclear ribonucleoprotein A' OS=Caenorhabditis elegans GN=mog-2 PE=1 SV=1 - [RU2A_CAEEL]	253	28.8468	7.92822	1	8	355.308	36.36	8	11
Q27527	enol-1	Enolase OS=Caenorhabditis elegans GN=enol-1 PE=1 SV=3 - [ENO_CAEEL]	434	46.5878	5.85889	1	9	354.493	29.72	9	12
Q9N358	cct-8	T-complex protein 1 subunit theta OS=Caenorhabditis elegans GN=cct-8 PE=1 SV=3 - [TCPQ_CAEEL]	548	59.6957	6.17627	2	9	353.667	19.16	9	14
Q17348	snr-1	Small nuclear ribonucleoprotein Sm D3 OS=Caenorhabditis elegans GN=snr-1 PE=2 SV=2 - [SMD3_CAEEL]	136	14.8026	10.814	1	3	351.862	29.41	3	14
Q04833	lrp-1	Low-density lipoprotein receptor-related protein OS=Caenorhabditis elegans GN=lrp-1 PE=1 SV=1 - [LRP_CAEEL]	4753	526.082	5.12256	1	10	351.41	2.46	10	12
Q20774	dnj-13	DNaJ domain (Prokaryotic heat shock protein) OS=Caenorhabditis elegans GN=dnj-13 PE=1 SV=1 - [Q20774_CAEEL]	331	36.2425	9.20264	1	5	350.184	17.52	5	9
Q86B39	alg-2	Protein argonaute OS=Caenorhabditis elegans GN=alg-2 PE=1 SV=1 - [Q86B39_CAEEL]	891	99.4627	8.98291	2	3	349.559	12.35	8	17
Q21190	unc-1	Protein unc-1 OS=Caenorhabditis elegans GN=unc-1 PE=3 SV=2 - [UNC1_CAEEL]	285	31.6365	5.75732	8	4	347.975	22.11	6	8
P30651	ZK643.5	Uncharacterized protein ZK643.5 OS=Caenorhabditis elegans GN=ZK643.5 PE=4 SV=2 - [YOW5_CAEEL]	487	55.2085	6.3667	1	9	347.71	19.51	9	12
Q19007	nap-1	Nucleosome Assembly Protein OS=Caenorhabditis elegans GN=nap-1 PE=1 SV=1 - [Q19007_CAEEL]	316	35.6427	4.64014	1	8	346.835	33.23	8	14
G5EC91	dpy-11	DumPY: shorter than wild-type OS=Caenorhabditis elegans GN=dpy-11 PE=1 SV=1 - [G5EC91_CAEEL]	246	27.3642	9.12939	1	4	346.33	22.36	4	9
G5EEW6	sig-7	Uncharacterized protein OS=Caenorhabditis elegans GN=sig-7 PE=1 SV=1 - [G5EEW6_CAEEL]	427	50.3751	7.23975	2	7	345.62	22.48	7	12
Q20641	nmy-1	Non-muscle MYosin OS=Caenorhabditis elegans GN=nmy-1 PE=1 SV=2 - [Q20641_CAEEL]	1963	229.229	5.71924	2	9	343.953	6.37	10	11
O16266	CELE_F40A3.6	Uncharacterized protein OS=Caenorhabditis elegans GN=CELE_F40A3.6 PE=1 SV=1 - [O16266_CAEEL]	258	30.2249	8.1333	1	11	343.806	56.98	11	14
Q9XX35	CELE_Y32B12B.2	Uncharacterized protein OS=Caenorhabditis elegans GN=CELE_Y32B12B.2 PE=1 SV=3 - [Q9XX35_CAEEL]	812	94.553	4.97021	2	12	343.25	12.93	12	19
Q20585	rpn-7	26S proteasome non-ATPase regulatory subunit 6 OS=Caenorhabditis elegans GN=rpn-7 PE=3 SV=1 - [PSMD6_CAEEL]	410	47.5533	6.81494	1	8	343.062	24.39	8	14
Q18115	rpn-2	26S proteasome non-ATPase regulatory subunit 1 OS=Caenorhabditis elegans GN=rpn-2 PE=3 SV=4 - [PSMD1_CAEEL]	965	105.941	7.63525	1	13	341.797	13.68	13	18
Q21736	CELE_R05D11.4	Uncharacterized protein OS=Caenorhabditis elegans GN=CELE_R05D11.4 PE=1 SV=1 - [Q21736_CAEEL]	581	65.9098	9.48096	1	10	340.481	19.28	10	13
Q22620	pars-1	Prolyl Amino-acyl tRNA Synthetase OS=Caenorhabditis elegans GN=pars-1 PE=1 SV=1 - [Q22620_CAEEL]	581	65.7774	7.62061	2	11	340.414	23.24	11	16
P52015	cyn-7	Peptidyl-prolyl cis-trans isomerase 7 OS=Caenorhabditis elegans GN=cyn-7 PE=1 SV=2 - [CYP7_CAEEL]	171	18.3893	8.44092	3	4	338.808	29.24	4	12
P34662	rpl-35	60S ribosomal protein L35 OS=Caenorhabditis elegans GN=rpl-35 PE=3 SV=1 - [RL35_CAEEL]	123	14.1862	11.2681	1	8	337.689	36.59	8	16
O44503	CELE_R02D3.1	Uncharacterized protein OS=Caenorhabditis elegans GN=CELE_R02D3.1 PE=1 SV=1 - [O44503_CAEEL]	934	103.686	7.06396	2	10	337.307	13.49	10	12
Q93615	F27D4.1	Probable electron transfer flavoprotein subunit alpha, mitochondrial OS=Caenorhabditis elegans GN=F27D4.1 PE=3 SV=2 - [ETFA_CAEEL]	332	34.4335	9.18799	1	8	337.191	36.45	8	9
Q21106	dcaf-1	DDB1- and CUL4-associated factor homolog 1 OS=Caenorhabditis elegans GN=dcaf-1 PE=3 SV=5 - [DCAF1_CAEEL]	1701	192.776	5.13525	1	9	337.07	5.29	9	14
Q09958	C18A3.3	Probable rRNA-processing protein EBP2 homolog OS=Caenorhabditis elegans GN=C18A3.3 PE=1 SV=2 - [EBP2_CAEEL]	340	38.0597	9.70068	1	5	335.716	16.76	5	14
Q18359	C33A12.1	Probable NADH dehydrogenase [ubiquinone] 1 alpha subcomplex subunit 5 OS=Caenorhabditis elegans GN=C33A12.1 PE=3 SV=1 - [NDUA5_CAEEL]	150	17.3241	9.33447	1	9	335.547	52.67	9	14
O44572	tni-4	Troponin I 4 OS=Caenorhabditis elegans GN=tni-4 PE=2 SV=2 - [TNNI4_CAEEL]	194	23.0453	8.96826	2	5	335.14	33.51	5	8
Q23624	CELE_ZK829.7	Uncharacterized protein OS=Caenorhabditis elegans GN=CELE_ZK829.7 PE=1 SV=2 - [Q23624_CAEEL]	372	40.2028	5.60498	1	5	333.924	15.86	5	9
Q93761	F53C11.3	Uncharacterized oxidoreductase F53C11.3 OS=Caenorhabditis elegans GN=F53C11.3 PE=3 SV=1 - [YXEK_CAEEL]	313	33.3682	8.26514	2	9	331.889	42.49	9	13
D0IMZ6	fln-1	FiLamiN (Actin binding protein) homolog OS=Caenorhabditis elegans GN=fln-1 PE=1 SV=1 - [D0IMZ6_CAEEL]	836	89.252	8.07471	17	11	330.347	16.27	11	15
Q20720	CELE_F53F4.11	Uncharacterized protein OS=Caenorhabditis elegans GN=CELE_F53F4.11 PE=1 SV=2 - [Q20720_CAEEL]	543	59.8508	9.43701	1	5	326.72	11.79	5	8
Q86S80	rme-1	Receptor Mediated Endocytosis OS=Caenorhabditis elegans GN=rme-1 PE=1 SV=1 - [Q86S80_CAEEL]	555	62.6152	6.26514	6	6	325.773	14.05	6	11
G5EGK8	let-92	Serine/threonine-protein phosphatase OS=Caenorhabditis elegans GN=let-92 PE=1 SV=1 - [G5EGK8_CAEEL]	318	36.2786	5.26221	1	7	325.719	27.99	7	9
O01974	eif-3.H	Eukaryotic translation initiation factor 3 subunit H OS=Caenorhabditis elegans GN=eif-3.H PE=3 SV=2 - [EIF3H_CAEEL]	365	40.9387	5.88428	1	6	323.243	21.64	6	11
Q8MQ13	CELE_F59F3.6	Uncharacterized protein OS=Caenorhabditis elegans GN=CELE_F59F3.6 PE=1 SV=1 - [Q8MQ13_CAEEL]	173	20.2244	7.37158	1	10	321.29	61.27	10	15
Q19289	ifb-1	Intermediate filament protein ifb-1 OS=Caenorhabditis elegans GN=ifb-1 PE=1 SV=1 - [IFB1_CAEEL]	589	67.108	6.22705	1	9	320.989	18.85	10	12
G5ECY0	dlg-1	Drosophila Discs LarGe homolog OS=Caenorhabditis elegans GN=dlg-1 PE=1 SV=1 - [G5ECY0_CAEEL]	967	106.927	6.93213	3	8	318.17	9.2	8	10
Q22716	rpl-32	Ribosomal Protein, Large subunit OS=Caenorhabditis elegans GN=rpl-32 PE=1 SV=1 - [Q22716_CAEEL]	134	15.5065	11.2974	2	7	318.076	42.54	7	16
P34640	ZK512.2	Probable ATP-dependent RNA helicase DDX55 homolog OS=Caenorhabditis elegans GN=ZK512.2 PE=3 SV=2 - [DDX55_CAEEL]	578	65.7869	9.5249	2	9	317.978	13.15	9	16
Q8MXR6	sqd-1	Homologous to Drosophila SQD (Squid) protein OS=Caenorhabditis elegans GN=sqd-1 PE=1 SV=1 - [Q8MXR6_CAEEL]	305	33.447	8.77783	2	5	317.09	31.8	5	8
O62246	cope-1	Coatomer subunit epsilon OS=Caenorhabditis elegans GN=cope-1 PE=3 SV=1 - [COPE_CAEEL]	292	32.7828	5.31299	1	8	316.456	43.15	8	9
Q20822	srpa-68	Probable signal recognition particle subunit SRP68 OS=Caenorhabditis elegans GN=srpa-68 PE=3 SV=2 - [SRP68_CAEEL]	622	70.5301	8.92432	1	6	315.64	11.41	6	12
G5ED31	ucr-2.1	Ubiquinol-Cytochrome c oxidoReductase complex OS=Caenorhabditis elegans GN=ucr-2.1 PE=1 SV=1 - [G5ED31_CAEEL]	410	42.7423	8.07471	2	5	314.896	17.56	5	7
Q17802	cpg-1	Chondroitin proteoglycan 1 OS=Caenorhabditis elegans GN=cpg-1 PE=1 SV=1 - [CPG1_CAEEL]	584	61.7664	3.75146	1	3	314.426	5.65	3	12
O01598	let-355	Uncharacterized protein OS=Caenorhabditis elegans GN=let-355 PE=1 SV=3 - [O01598_CAEEL]	856	96.4546	9.5835	1	9	309.912	12.97	9	11
O18033	nra-2	Nicalin OS=Caenorhabditis elegans GN=nra-2 PE=1 SV=1 - [O18033_CAEEL]	557	61.1316	6.3667	2	9	309.149	23.52	9	11
C1P641	epi-1	Uncharacterized protein OS=Caenorhabditis elegans GN=epi-1 PE=1 SV=1 - [C1P641_CAEEL]	3663	403.069	5.35107	7	7	307.935	2.21	7	11
P34601	ZK1098.2	Uncharacterized protein ZK1098.2 OS=Caenorhabditis elegans GN=ZK1098.2 PE=4 SV=3 - [YO62_CAEEL]	650	74.1801	7.48877	1	7	305.641	11.54	7	13
O44772	CELE_K04F10.7	Uncharacterized protein OS=Caenorhabditis elegans GN=CELE_K04F10.7 PE=1 SV=1 - [O44772_CAEEL]	293	33.6336	9.11475	1	6	305.506	29.01	6	13
H2L2J6	pqn-27	Prion-like-(Q/N-rich)-domain-bearing protein OS=Caenorhabditis elegans GN=pqn-27 PE=1 SV=1 - [H2L2J6_CAEEL]	373	41.9785	4.67822	3	5	303.425	17.96	5	8
O17953	dld-1	Dihydrolipoyl dehydrogenase, mitochondrial OS=Caenorhabditis elegans GN=dld-1 PE=3 SV=2 - [DLDH_CAEEL]	495	52.6001	7.6792	1	5	302.69	17.78	5	8
Q09936	C53C9.2	Uncharacterized protein C53C9.2 OS=Caenorhabditis elegans GN=C53C9.2 PE=3 SV=2 - [YSE2_CAEEL]	397	44.7887	4.65283	1	12	302.6	33.25	12	14
O44985	teg-4	Tumorous Enhancer of Glp-1(Gf) OS=Caenorhabditis elegans GN=teg-4 PE=1 SV=1 - [O44985_CAEEL]	1220	135.014	5.56689	1	10	302.108	10.08	10	12
K8ESK7	CELE_R13H4.2	Uncharacterized protein OS=Caenorhabditis elegans GN=CELE_R13H4.2 PE=1 SV=1 - [K8ESK7_CAEEL]	192	23.8393	9.48096	3	7	300.92	46.35	7	10
O62106	eif-6	Eukaryotic translation initiation factor 6 OS=Caenorhabditis elegans GN=eif-6 PE=3 SV=1 - [IF6_CAEEL]	246	26.2914	4.79248	1	4	299.761	17.89	4	7
H2KZG6	acdh-1	Acyl CoA DeHydrogenase OS=Caenorhabditis elegans GN=acdh-1 PE=1 SV=1 - [H2KZG6_CAEEL]	427	47.1177	6.85889	2	7	298.79	21.55	7	10
Q18336	hil-1	Histone H1.X OS=Caenorhabditis elegans GN=hil-1 PE=2 SV=1 - [H1X_CAEEL]	232	25.3463	10.1401	1	7	298.209	33.62	7	12
Q17561	aly-1	Ref/ALY RNA export adaptor family OS=Caenorhabditis elegans GN=aly-1 PE=1 SV=1 - [Q17561_CAEEL]	223	24.3033	11.3267	1	6	297.628	27.35	6	9
O01755	apm-1	AdaPtin, Mu/medium chain (Clathrin associated complex) OS=Caenorhabditis elegans GN=apm-1 PE=1 SV=2 - [O01755_CAEEL]	426	48.5871	8.14795	1	6	297.51	20.42	6	9
O62183	aly-2	Ref/ALY RNA export adaptor family OS=Caenorhabditis elegans GN=aly-2 PE=1 SV=1 - [O62183_CAEEL]	227	24.461	10.9604	1	3	295.884	16.74	3	9
P53014	mlc-3	Myosin, essential light chain OS=Caenorhabditis elegans GN=mlc-3 PE=3 SV=1 - [MLE_CAEEL]	153	17.1337	4.70361	2	10	295.303	67.32	10	14
Q03560	ctr-9	RNA polymerase-associated protein CTR9 OS=Caenorhabditis elegans GN=ctr-9 PE=3 SV=3 - [CTR9_CAEEL]	1150	132.262	6.53662	1	15	294.689	12.43	15	16
P34703	emb-5	Suppressor of Ty 6 homolog OS=Caenorhabditis elegans GN=emb-5 PE=1 SV=1 - [SPT6H_CAEEL]	1521	175.706	4.99561	1	10	293.582	6.97	10	13
O01504	rpa-2	60S acidic ribosomal protein P2 OS=Caenorhabditis elegans GN=rpa-2 PE=3 SV=2 - [RLA2_CAEEL]	107	10.8064	4.67822	1	3	293.28	49.53	4	8
P47207	cct-2	T-complex protein 1 subunit beta OS=Caenorhabditis elegans GN=cct-2 PE=1 SV=2 - [TCPB_CAEEL]	529	56.9389	5.92236	1	10	292.902	22.87	10	16
Q21742	CELE_R05F9.6	Uncharacterized protein OS=Caenorhabditis elegans GN=CELE_R05F9.6 PE=1 SV=1 - [Q21742_CAEEL]	568	61.7158	6.49365	1	6	292.618	15.67	6	9
Q09543	paa-1	Probable serine/threonine-protein phosphatase PP2A regulatory subunit OS=Caenorhabditis elegans GN=paa-1 PE=3 SV=2 - [2AAA_CAEEL]	590	66.1068	5.21143	1	10	291.053	17.12	10	13
Q21832	rnp-4	RNA-binding protein 8A OS=Caenorhabditis elegans GN=rnp-4 PE=1 SV=1 - [Q21832_CAEEL]	142	16.1039	5.05908	1	4	290.44	36.62	4	5
Q93619	tag-173	Uncharacterized protein OS=Caenorhabditis elegans GN=tag-173 PE=1 SV=1 - [Q93619_CAEEL]	366	40.0274	6.68311	1	4	290.199	18.85	4	7
Q95QW0	eif-3.L	Eukaryotic translation initiation factor 3 subunit L OS=Caenorhabditis elegans GN=eif-3.L PE=3 SV=1 - [EIF3L_CAEEL]	537	62.4365	5.40186	2	10	289.585	20.48	10	13
Q95X44	vha-8	Vacuolar H ATPase OS=Caenorhabditis elegans GN=vha-8 PE=1 SV=1 - [Q95X44_CAEEL]	226	25.5705	7.25439	1	7	288.613	44.25	7	9
I7FXD3	rab-5	Rab-5 (Fragment) OS=Caenorhabditis elegans GN=rab-5 PE=2 SV=1 - [I7FXD3_CAEEL]	207	22.6903	7.76709	2	4	287.025	34.3	4	8
Q20780	alh-1	ALdehyde deHydrogenase OS=Caenorhabditis elegans GN=alh-1 PE=1 SV=3 - [Q20780_CAEEL]	510	55.0242	7.53271	2	7	286.59	20.2	7	10
Q9XWI6	eif-3.B	Eukaryotic translation initiation factor 3 subunit B OS=Caenorhabditis elegans GN=eif-3.B PE=3 SV=2 - [EIF3B_CAEEL]	725	83.0127	5.94775	1	9	286.193	14.76	9	12
Q20938	rpn-6.1	Probable 26S proteasome regulatory subunit rpn-6.1 OS=Caenorhabditis elegans GN=rpn-6.1 PE=2 SV=2 - [PS11A_CAEEL]	438	49.0602	5.43994	1	8	285.78	27.85	8	10
Q09511	rsp-4	Probable splicing factor, arginine/serine-rich 4 OS=Caenorhabditis elegans GN=rsp-4 PE=3 SV=1 - [RSP4_CAEEL]	196	22.5746	11.7515	1	5	284.745	19.39	5	8
Q95PZ1	CELE_Y67H2A.5	Uncharacterized protein OS=Caenorhabditis elegans GN=CELE_Y67H2A.5 PE=1 SV=1 - [Q95PZ1_CAEEL]	145	15.5043	9.51025	1	3	284.735	31.03	3	8
P54412	eef-1G	Probable elongation factor 1-gamma OS=Caenorhabditis elegans GN=eef-1G PE=3 SV=1 - [EF1G_CAEEL]	398	44.3597	6.65381	1	8	282.83	27.39	8	10
Q9TXP0	rps-27	40S ribosomal protein S27 OS=Caenorhabditis elegans GN=rps-27 PE=1 SV=3 - [RS27_CAEEL]	83	9.34078	9.20264	1	4	282.623	44.58	4	7
Q18674	C47E12.7	Ribosomal RNA processing protein 1 homolog OS=Caenorhabditis elegans GN=C47E12.7 PE=3 SV=2 - [RRP1_CAEEL]	397	45.8412	9.27588	1	10	280.96	24.69	10	14
Q9BKU5	CELE_Y37E3.8	Uncharacterized protein OS=Caenorhabditis elegans GN=CELE_Y37E3.8 PE=1 SV=1 - [Q9BKU5_CAEEL]	145	16.1937	10.5503	2	6	279.922	31.03	6	18
A0A0K3AQS9	lev-11	Uncharacterized protein OS=Caenorhabditis elegans GN=lev-11 PE=1 SV=1 - [A0A0K3AQS9_CAEEL]	193	22.5864	4.58936	14	8	278.363	54.4	8	14
O02485	ZK1073.1	Uncharacterized protein ZK1073.1 OS=Caenorhabditis elegans GN=ZK1073.1 PE=3 SV=1 - [YDJ1_CAEEL]	325	35.5681	7.31299	1	6	276.973	21.54	6	7
Q27GU1	csr-1	Chromosome-Segregation and RNAi deficient OS=Caenorhabditis elegans GN=csr-1 PE=1 SV=1 - [Q27GU1_CAEEL]	867	98.6412	7.6792	3	12	276.045	11.19	12	15
Q19371	sec-24.1	Yeast SEC homolog OS=Caenorhabditis elegans GN=sec-24.1 PE=1 SV=1 - [Q19371_CAEEL]	1126	121.046	6.82959	1	11	275.351	10.39	11	15
Q10578	rpb-2	DNA-directed RNA polymerase II subunit RPB2 OS=Caenorhabditis elegans GN=rpb-2 PE=2 SV=2 - [RPB2_CAEEL]	1193	134.818	6.84424	1	11	274.822	12.49	11	15
O02155	CELE_T09B4.5	Uncharacterized protein OS=Caenorhabditis elegans GN=CELE_T09B4.5 PE=1 SV=1 - [O02155_CAEEL]	327	36.4031	11.4878	2	4	273.72	14.07	4	6
Q9NAH6	rsks-1	Ribosomal protein S6 kinase beta OS=Caenorhabditis elegans GN=rsks-1 PE=1 SV=2 - [KS6B_CAEEL]	550	60.3857	5.93506	1	5	273.59	12.73	5	10
Q9NEU2	pro-3	Protein SDA1 homolog OS=Caenorhabditis elegans GN=pro-3 PE=1 SV=4 - [SDA1_CAEEL]	801	92.0728	6.80029	1	9	271.98	10.74	9	14
O01780	CELE_W03F11.1	Uncharacterized protein OS=Caenorhabditis elegans GN=CELE_W03F11.1 PE=1 SV=1 - [O01780_CAEEL]	235	27.0717	8.35303	2	5	271.826	31.91	5	9
Q23445	ZK180.4	GTP-binding protein SAR1 OS=Caenorhabditis elegans GN=ZK180.4 PE=3 SV=1 - [SAR1_CAEEL]	193	21.695	6.1001	1	6	271.332	48.7	6	9
P34559	ech-6	Probable enoyl-CoA hydratase, mitochondrial OS=Caenorhabditis elegans GN=ech-6 PE=3 SV=1 - [ECHM_CAEEL]	288	31.152	8.38232	1	4	271.318	19.44	4	9
P17343	gpb-1	Guanine nucleotide-binding protein subunit beta-1 OS=Caenorhabditis elegans GN=gpb-1 PE=1 SV=2 - [GBB1_CAEEL]	340	37.3819	5.99854	1	4	270.457	11.18	4	6
Q21155	rnp-5	RNP (RRM RNA binding domain) containing OS=Caenorhabditis elegans GN=rnp-5 PE=1 SV=3 - [Q21155_CAEEL]	289	32.2176	12.1616	1	5	269.955	24.22	5	8
Q21874	R09E10.5	Uncharacterized protein R09E10.5 OS=Caenorhabditis elegans GN=R09E10.5 PE=1 SV=2 - [YF1M_CAEEL]	1437	163.293	6.34131	1	7	269.277	6.75	8	11
Q86NK0	CELE_T08B2.5	Uncharacterized protein OS=Caenorhabditis elegans GN=CELE_T08B2.5 PE=1 SV=1 - [Q86NK0_CAEEL]	838	94.208	9.46631	5	5	268.685	8	5	12
Q9XW17	car-1	Cytokinesis, Apoptosis, RNA-associated OS=Caenorhabditis elegans GN=car-1 PE=1 SV=1 - [Q9XW17_CAEEL]	340	37.5875	9.17334	1	4	267.963	18.24	4	6
Q23382	ccdc-47	CCDC (Human Coiled Coil Domain Containing) homolog OS=Caenorhabditis elegans GN=ccdc-47 PE=1 SV=1 - [Q23382_CAEEL]	442	50.7587	5.17334	1	4	265.885	10.18	4	8
Q20779	tag-174	Probable cytochrome c oxidase subunit 6A, mitochondrial OS=Caenorhabditis elegans GN=tag-174 PE=3 SV=1 - [COX6A_CAEEL]	128	14.7334	9.53955	1	4	265.79	45.31	4	8
O62107	gale-1	UDP-GALactose 4-Epimerase OS=Caenorhabditis elegans GN=gale-1 PE=1 SV=1 - [O62107_CAEEL]	347	37.6593	6.23975	2	3	265.19	15.27	3	6
Q9U1Y6	dhs-24	DeHydrogenases, Short chain OS=Caenorhabditis elegans GN=dhs-24 PE=1 SV=3 - [Q9U1Y6_CAEEL]	384	43.141	8.54346	1	7	263.836	21.35	7	7
O76833	mca-2	Calcium-transporting ATPase OS=Caenorhabditis elegans GN=mca-2 PE=2 SV=1 - [O76833_CAEEL]	1158	126.84	6.66846	2	5	262.54	8.38	8	9
P34575	cts-1	Probable citrate synthase, mitochondrial OS=Caenorhabditis elegans GN=cts-1 PE=3 SV=1 - [CISY_CAEEL]	468	51.5075	7.84033	1	6	262.113	15.38	6	10
O17287	tomm-22	Translocase of Outer Mitochondrial Membrane OS=Caenorhabditis elegans GN=tomm-22 PE=1 SV=1 - [O17287_CAEEL]	109	12.1683	4.88135	1	3	261.289	38.53	3	6
P30625	kin-2	cAMP-dependent protein kinase regulatory subunit OS=Caenorhabditis elegans GN=kin-2 PE=1 SV=3 - [KAPR_CAEEL]	366	41.442	5.17334	1	10	260.732	31.69	10	10
U4PBX2	rnp-3	RNP (RRM RNA binding domain) containing OS=Caenorhabditis elegans GN=rnp-3 PE=1 SV=1 - [U4PBX2_CAEEL]	188	21.415	9.24658	2	5	258.394	31.38	5	7
P52017	cyn-10	Peptidyl-prolyl cis-trans isomerase 10 OS=Caenorhabditis elegans GN=cyn-10 PE=2 SV=2 - [CYP10_CAEEL]	161	17.9487	5.51611	1	6	258.14	50.93	6	9
Q9N4I3	CELE_Y71F9AL.9	Uncharacterized protein OS=Caenorhabditis elegans GN=CELE_Y71F9AL.9 PE=1 SV=1 - [Q9N4I3_CAEEL]	314	32.1669	9.80322	1	5	256.824	29.94	5	7
Q9N4A7	npp-20	Protein SEC13 homolog OS=Caenorhabditis elegans GN=npp-20 PE=3 SV=1 - [SEC13_CAEEL]	313	34.6701	7.02002	1	7	256.445	27.48	7	8
O61199	ogdh-1	2-oxoglutarate dehydrogenase, mitochondrial OS=Caenorhabditis elegans GN=ogdh-1 PE=1 SV=2 - [ODO1_CAEEL]	1029	115.588	6.80029	5	8	255.155	10.3	8	9
Q21525	CELE_M05D6.6	Uncharacterized protein OS=Caenorhabditis elegans GN=CELE_M05D6.6 PE=1 SV=1 - [Q21525_CAEEL]	161	18.2763	9.74463	1	3	255.03	19.88	3	5
Q9U210	CELE_Y57A10A.27	Uncharacterized protein OS=Caenorhabditis elegans GN=CELE_Y57A10A.27 PE=1 SV=1 - [Q9U210_CAEEL]	388	42.9084	6.12549	1	6	254.105	16.49	6	8
Q688Z3	CELE_Y94H6A.5	Uncharacterized protein OS=Caenorhabditis elegans GN=CELE_Y94H6A.5 PE=1 SV=1 - [Q688Z3_CAEEL]	825	93.0249	9.43701	1	9	253.964	10.79	9	13
P46550	cct-6	T-complex protein 1 subunit zeta OS=Caenorhabditis elegans GN=cct-6 PE=1 SV=1 - [TCPZ_CAEEL]	539	58.868	6.27783	2	12	253.627	24.86	12	14
Q22021	R53.4	Putative ATP synthase subunit f, mitochondrial OS=Caenorhabditis elegans GN=R53.4 PE=3 SV=1 - [ATPK_CAEEL]	153	18.7376	10.0376	1	7	252.79	39.22	7	12
G5EDY8	drp-1	Dynamin-Related Protein OS=Caenorhabditis elegans GN=drp-1 PE=1 SV=1 - [G5EDY8_CAEEL]	705	79.2157	6.63916	7	9	251.468	14.04	9	12
P54216	aldo-1	Fructose-bisphosphate aldolase 1 OS=Caenorhabditis elegans GN=aldo-1 PE=1 SV=1 - [ALF1_CAEEL]	366	39.2159	6.72705	1	6	250.75	29.78	6	8
O45569	nep-17	NEPrilysin metallopeptidase family OS=Caenorhabditis elegans GN=nep-17 PE=1 SV=1 - [O45569_CAEEL]	1589	177.936	5.32568	2	7	247.83	5.54	7	8
P34355	acox-5	Probable peroxisomal acyl-coenzyme A oxidase 5 OS=Caenorhabditis elegans GN=acox-5 PE=3 SV=1 - [ACOX5_CAEEL]	659	74.6663	6.82959	1	5	246.879	12.44	5	7
Q19264	F09E5.3	Putative deoxyribose-phosphate aldolase OS=Caenorhabditis elegans GN=F09E5.3 PE=3 SV=1 - [DEOC_CAEEL]	303	33.0662	7.40088	1	7	246.447	31.35	7	7
Q22018	dtmk-1	Thymidylate kinase OS=Caenorhabditis elegans GN=dtmk-1 PE=3 SV=1 - [KTHY_CAEEL]	218	24.3274	5.40186	1	5	245.4	31.19	5	6
G4SL51	pqn-52	Prion-like-(Q/N-rich)-domain-bearing protein OS=Caenorhabditis elegans GN=pqn-52 PE=1 SV=1 - [G4SL51_CAEEL]	544	62.5535	6.03662	4	8	245.284	18.75	8	11
Q17336	let-858	Pre-mRNA-splicing factor CWC22 homolog OS=Caenorhabditis elegans GN=let-858 PE=2 SV=1 - [CWC22_CAEEL]	897	104.205	6.771	1	10	244.593	13.94	10	14
P34528	K12H4.7	Putative serine protease K12H4.7 OS=Caenorhabditis elegans GN=K12H4.7 PE=3 SV=2 - [YM67_CAEEL]	510	56.5314	6.27783	1	4	244.261	9.22	4	7
Q95YF3	cgh-1	ATP-dependent RNA helicase cgh-1 OS=Caenorhabditis elegans GN=cgh-1 PE=1 SV=1 - [CGH1_CAEEL]	430	48.6823	8.06006	1	9	242.797	24.65	9	18
H2L0I3	lfi-1	Lin-5 (Five) Interacting protein OS=Caenorhabditis elegans GN=lfi-1 PE=1 SV=1 - [H2L0I3_CAEEL]	2350	269.363	5.93506	3	12	241.953	5.32	12	15
G5EBX3	cyl-1	CYclin L OS=Caenorhabditis elegans GN=cyl-1 PE=1 SV=1 - [G5EBX3_CAEEL]	480	55.9581	9.87646	1	8	241.343	18.75	9	13
Q18853	cyc-1	CYtochrome C OS=Caenorhabditis elegans GN=cyc-1 PE=1 SV=1 - [Q18853_CAEEL]	285	30.9477	8.57275	1	5	241.297	34.74	5	9
Q20049	idhg-1	Isocitrate dehydrogenase [NAD] subunit, mitochondrial OS=Caenorhabditis elegans GN=idhg-1 PE=1 SV=2 - [Q20049_CAEEL]	396	43.5545	7.6792	1	7	241.197	30.05	9	16
P53585	D1005.1	Probable ATP-citrate synthase OS=Caenorhabditis elegans GN=D1005.1 PE=3 SV=1 - [ACLY_CAEEL]	1106	121.54	7.04932	23	12	240.414	14.1	12	14
Q22537	CELE_T17H7.1	Uncharacterized protein OS=Caenorhabditis elegans GN=CELE_T17H7.1 PE=1 SV=1 - [Q22537_CAEEL]	682	72.1061	9.70068	1	5	238.995	18.91	5	8
[truncated: 1,501 more rows]

## Sheet: OH441 - GFP
Accession	gene name	Description	# AAs	MW [kDa]	calc. pI	# Proteins	# Unique Peptides	Score	Coverage	# Peptides	# PSMs
[truncated: 1,991 more rows]

[truncated: 1 more sheets: STR485 unc-119-GFP]
