# Supplementary material for: Cortical anchoring of the microtubule cytoskeleton is essential for neuron polarity
Source: eLife. 2020 Apr 15;9:e55111. doi: 10.7554/eLife.55111 (PMC7159925; doi:10.7554/eLife.55111)
Supplement: Supplementary file 2. [file elife-55111-supp2.xlsx]

## Sheet: Plasmids
	Construct		Ligation	Insert(s)	Backbone	Notes
	pLH11	Pwrt-2::unc33LΔC::gfp::unc-54UTR	NEBuilder	PCR with o551 + o64 on pMH520	PMH690 digested with Nhel +SAP	gfp is iserted in unc-33 at the start of the S isoform
	pLH17	bio- mcherry-unc-44[M-II]	NEBuilder	PCR1 with o1248 + o1249 on genomic DNA;PCR2 with o1250 + o1251 on genomic DNA	bio-mCherry-C1 vector (Wu et al., 2016) digested with NotI + SmaI + SAP	Did not express well
	pLH20	bio- mcherry-unc-44[M-I]	NEBuilder	step1:PCR with o1258 + PLHo36 on genomic DNA; step2: PCR1 with PLHo37+PLHo34 on genomic DNA, PCR2 withPLHo35+o1260 on genomic DNA	Step 1: bio-mCherry-C1 vector (Wu et al., 2016) digested with Kpnl+Apal; Step 2: vector step 1 digested with ApaI	Did not express well
	pLH26	gfp-unc-33S	NEBuilder	PCR with o574 + o668 on pMH339	pEGFP-C1 digested with BgIII+SalI
	PLH30	bio-mCherry-unc-44[M1]	NEBuilder	oligo: PLHo66	pLH20 digested with Ascl+Xbal
	PLH31	bio-mCherry-unc-44[M2]	NEBuilder	oligo: PLHo65	PLH20 digested with Xbal+Notl
	PLH32	bio-mCherry-unc-44[M3]	NEBuilder	oligo: PLHo67	pLH17 digested with Xbal+Nhel
	PLH33	bio-mCherry-unc-44[M4]	NEBuilder	oligo: PLHo68	PLH17 digested with Xbal+Ascl
	pMH107	Pmec-4 in pDONR4-1	Gateway BP reaction	PCR with o334 + o335 on genomic DNA	pDONR4-1
	pMH157	bfp in pDONR221	Gateway BP reaction	PCR with o447 + o448 on pJJR81[bfp-SEC vector]	pDONR221	pJJR81 is a gift from the Boxem lab - Addgene #75029
	pMH165	Prab-3 in pDONR4-1	Gateway BP reaction	PCR with o415 + o416 on genomic DNA	pDONR4-1
	pMH166	Pdes-2::bfp::tbb-2UTR	Gateway LR reaction	Pdes-2 in pDONR4-1 (Harterink et al., 2017); bfp in pDONR221 (pMH157); tbb-2UTR in pDONR2-3 (Addgene: pCM1.36)	pDEST
	pMH207	Pdes-2::mKate2::tbb-2UTR	Gateway LR reaction	Pdes-2 in pDONR4-1 (Harterink et al., 2017); mKate2 in pDONR221 (Harterink et al., 2016); tbb-2UTR in pDONR2-3 (Addgene: pCM1.36)	pCFJ210
	pMH225	tba-1 in pDONR221	Gateway BP reaction	PCR with o513 + o514 on cDNA	pDONR221
	pMH306	unc-33L::gfp in pDONR221	Gateway BP reaction	PCR with o582 + o686 on Pdes-2::ebp-2::gfp (gift from Bargman lab)	pDONR221	gfp is iserted in unc-33 at the start of the S isoform
	pMH311	unc-33M::GFP in pDONR221	Gateway BP reaction	PCR with o583 + o686 on pMH306	pDONR221	gfp is iserted in unc-33 at the start of the S isoform
	pMH312	Pdes-2::unc-33L::gfp(stop)gfp::unc-54UTR	Gateway LR reaction	Pdes-2 in pDONR4-1 (Harterink et al., 2017); unc-33L::GFP in pDONR221 (pMH306); GFP::tbb-2UTR in pDONR2-3 (Addgene: pJA256)	pCFJ210	errorously added an extra gfp after the unc-33L-stop codon. This was repaired in construct: pMH457
	pMH313	Pdes-2::unc-33M::gfp::tbb-2UTR	Gateway LR reaction	Pdes-2 in pDONR4-1 (Harterink et al., 2017); unc-33M::GFP in pDONR221 (pMH311); tbb-2UTR in pDONR2-3 (Addgene: pCM1.36)	pCFJ210	gfp is iserted in unc-33 at the start of the S isoform
	pMH339	unc-33L-gfp	NEBuilder	PCR1 with o751+o752 on pEGFP-C1	PCR with o753+o754 on pMH330[Pcmv>unc-33L]	gfp is iserted in unc-33 at the start of the S isoform
	pMH344	gfp knock-in construct for unc-44	step 1 regular ligation, step 2 NEBuilder	step 1: PCR with o758 + o759 on genomic DNA and cut with BamHI+XhoI; step 2: PCR1 with o760 + o761 on codon optimized GFP (gift from van den Heuvel lab)	step 1: pME-MCS digested with BamHI+XhoI; step 2: PCR with o762 + o763 on vector step 1
	pMH448	Pdes-2::ebp-2::mKate2::unc-54UTR	Gateway LR reaction	Pdes-2 in pDONR4-1 (Harterink et al., 2017); ebp-2 in pDONR221 (Harterink et al., 2018); mKate-2 in pDONR2-3 (gift from H. Bringmann)	pCFJ150
	pMH457	Pdes-2::unc-33L::gfp::unc-54UTR	regular ligation	pMH293 cut with SpeI + ApaI	pMH312 digested with SpeI + ApaI	gfp is iserted in unc-33 at the start of the S isoform
	pMH459	Punc-86	Gateway BP reaction	PCR with 0680 + o932 on pH44[Punc-86::gfp::moesinABD] (gift from K. Shen)	pDONR4-1
	pMH485	Punc-86::ebp-2::gfp::tbb-2UTR	Gateway LR reaction	Punc-86 in pDONR4-1; ebp-2::gfp in pDONR221 (Harterink et al., 2018); tbb-2UTR in pDONR2-3 [Addgene #17249]	pCFJ210
	pMH501	Pdes-2::unc-119::gfp::unc-54UTR (no cb-unc-119)	NEBuilder	PCR with o1001+o1002 on cDNA	Pdes-2::ebp-2::gfp (Gift from C. Bargman) digested with NheI + KpnI
	pMH519	Pmec-4::mKate2::maph-1.1::unc-54UTR	Gateway LR reaction	Pmec-4 in pDONR4-1; mKate2 in pDONR221 (Harterink et al. 2018); maph-1.1 in pDONR2-3 (Harterink et al., 2018)	pKN146 (pCFJ201 vector supplemented with the unc-54 3′ UTR; gift from H. Karswagen)
	pMH520	Pwrt-2::unc-33L::gfp::tbb-2UTR	Gateway LR reaction	Pwrt-2 in pDONR4-1 (Harterink et al., 2016); unc-33L::gfp in pDONR221 (pMH306); tbb-2UTR in pDONR2-3 (Addgene: pCM1.36)	pCFJ210	gfp is iserted in unc-33 at the start of the S isoform
	pMH576	unc-33N-gfp	NEBuilder	PCR with o589 + o1130 on pMH339	pEGFP-N1 digested with AgeI + SalI
	pMH606	gfp-unc-119	NEBuilder	PCR with o1199 + o1200 on pMH501	pEGFP-C1 digested with SalI + XmaI
	pMH608	Pdes-2::ebp-2::mKate2::unc-54UTR	Gateway LR reaction	Pdes-2 in pDONR4-1 [Harterink et al., 2017]; ebp-2 in pDONR221 (Harterink et al., 2018); mKate-2 in pDONR2-3 (gift from H. Bringmann)	pDEST4-3
	pMH613	bio-mCherry-unc-44[C-term]	NEBuilder	PCR with o1190 + o1191 on cDNA	bio-mCherry-C1 vector (Wu et al., 2016) digested with KpnI + NotI
	pMH614	bio-mCherry-unc-44[N-term]	NEBuilder	PCR1 with o1182+o1209 on cDNA; PCR2 with o1183+o1208 on cDNA	bio-mCherry-C1 vector (Wu et al., 2016) digested with KpnI + NotI
	PMH643	gfp knock-in construct for unc-119 (sec vector)	NEBuilder	PCR1 with o1317 + o1318 on genomic DNA; PCR2 with o1319 + o1320 on genomic DNA	pJJR82 digested with Spel +AvrII	pJJR82 is a gift from the Boxem Lab - Addgene #75027
	pMH654	Pdes-2::NLS::bfp::p2A::NB-Degron::tbb-2UTR	NEBuilder	PCR with o1311 + 1312 on pMH80[Pdes in pDONR4-1] (Harterink et al., 2016)	pMH548[Pgcy-36::bfp::NLS::p2A::NB-Degron] (Harterink et al., 2018) digested with NheI + NotI
	pMH668	Pdes-2::gfp::unc-33S::unc54UTR	NEBuilder	PCR with o1069 + o1392 on pMH457	pMH457 digested with BamHI + NheI
	pMH669	Pwrt-2::gfp::unc-33S::unc-54UTR	NEBuilder	PCR with o1069 + o1392 on pMH457	pMH457 digested with BamHI + NheI
	pMH671	Pdes-2::MCS::tbb-2UTR	NEBuilder	PCR1 with o1407 + o1408 on pMH520; PCR2 with o1414 + o1416 on pMH80[Pdes in pDONR4-1] (Harterink et al., 2016)	pCFJ352 digested with BglII + AflII
	pMH672	Pdes-2::PA-gfp::tba-1::tbb-2UTR	NEBuilder	PCR1 with o1409+o1410 on PA-GFP-tubulin (Kuijpers et al., 2016) construct; PCR2 with o1411+o1412 on pMH225; PCR3 o1413+o1408 on pMH520; PCR4 with o1414+o1416 on pMH80[Pdes in pDONR4-1] (Harterink et al., 2016)	pCFJ352 digested with BglII + AflII
	pMH674	Pdes-2::unc-33MΔC::gfp::unc-54UTR	NEBuilder	PCR1 with o1425 + o1426 on pMH457; PCR2 with o1261 + o1427 on pMH457	pMH313 digested with SpeI + ApaI	gfp is iserted in unc-33 at the start of the S isoform
	pMH675	Pdes-2::unc-33LΔC::gfp::unc-54UTR	NEBuilder	PCR1 with o1425 + o1426 on pMH457; PCR2 with o1261 + o1427 on pMH457	pMH457 digested with SpeI + ApaI	gfp is iserted in unc-33 at the start of the S isoform
	pMH681	Prab-3::unc-33L::GFP::unc-54UTR	NEBuilder	PCR with o1458 + 1459 on pMH165	pMH667 digested with AvrII + BamHI	gfp is internal
	pMH690	Pwrt-2::unc-33SΔC::gfp::unc-54UTR	NEBuilder	PCR with o1486 + o1487 on pMH675	pMH669 digested with NruI + SpeI
	pMH695	Pdes-2::gfp::unc-33SΔC::unc-54UTR	regular ligation	Digest pMH668 (ApaI + AvrII)	pMH675 digested with ApaI + AvrII
	pMH696	Pdes-2::gfp::NLS::p2::vhhGFP::unc-33S::tbb-2UTR	NEBuilder	PCR1 with o1508+o1509 on pMH654; PCR2 with o1506 + o1510 on pMH668	pMH671 (Pdes-2 in pCFJ352) digested with AvrII + NcoI
	pMH706	bio-mCherry-unc-119	NEBuilder	PCR with o1538 + o1539 on pMH501	bio-mCherry-C1 vector (Wu et al., 2016) digested with BglII + SalI
	pMH733	Pdes-2::gfp::NLS::p2A::vhhGFP::unc-33S::tbb-2UTR (no unc119)	NEBuilder	oligo: o1622	pMH696 degested with SalI + AflII
	pMH740	Prab-3::gfp::NLS::p2A::vhhGFP::unc-33S::tbb-2UTR (no unc119)	NEBuilder	PCR with o1632 + o1633 on pMH681	pMH733 digested with BglII + NcoI
	pMH741	Pwrt-2::unc33LΔC::gfp::unc-54UTR (no unc-119)	NEBuilder	oligo: o1654	pLH11 digested with PstI + AvrII	gfp is iserted in unc-33 at the start of the S isoform

## Sheet: Oligos
Oligo	sequence
o61	GGGGACAAGTTTGTACAAAAAAGCAGGCTTGATGAGTAAAGGAGAAGAAC
o63	GGGGACCACTTTGTACAAGAAAGCTGGGTATTTGTATAGTTCATCCATGC
o64	GCATCACCTTCACCCTCTCC
o334	GGGGACAACTTTGTATAGAAAAGTTGGTACAAGCTTCAATACAAGC
o335	GGGGACTGCTTTTTTGTACAAACTTGTCTATAACTTGATAGCGATA
o415	GGGGACAACTTTGTATAGAAAAGTTGGATGGGAGCAGTGGACTGTC
o416	GGGGACTGCTTTTTTGTACAAACTTGCTGAAAATAGGGCTACTGTAG
o447	GGGGACAAGTTTGTACAAAAAAGCAGGCTTA ATGTCCGAACTCATCAAGG
o448	GGGGACCACTTTGTACAAGAAAGCTGGGTA GTTGAGCTTGTGTCCGAGC
o513	GGGGACAAGTTTGTACAAAAAAGCAGGCTTAATGCGTGAGGTCATCTCCATC
o514	GGGG-AC-CAC-TTT-GTA-CAA-GAA-AGC-TGG-GTT-ATACTCTTCTCCTTCCTCCTC
o551	ACGGCCATTGTCCCTTCCAC
o574	AAGACCCCAACGAGAAGCGC
o582	GGGGACAAGTTTGTACAAAAAAGCAGGCTTAAAAATGTTCCCGTTTTTAGCACC
o583	GGGGACAAGTTTGTACAAAAAAGCAGGCTTAAAAATGGATATGACGGATATTGAA
o585	GGGGACAGCTTTCTTGTACAAAGTGGTGATGTTCCCGTTTTTAGCACC
o586	GGGGACAACTTTGTATAATAAAGTTGCTACCAAAACCCTGTAGTCC
o589	TTTGTCGACCACCATGTTCCCGTTTTTAGCACC
o668	TAAAACCTCTACAAATGTGG
o680	GGGGACTGCTTTTTTGTACAAACTTGTCCGTGGAAAAGAGGGGGAC
o686	GGGGACCACTTTGTACAAGAAAGCTGGGTCTACCAAAACCCTGTAGTCC
o751	ATAGTGGAGACGACGGCAACCTAGCGCTACCGGTCGCCAC
o752	GACATTTCACCGCCGCCTCCGGACTTGTACAGCTCGTCCA
o753	GTTGCCGTCGTCTCCACTAT
o754	GGAGGCGGCGGTGAAATGTC
o758	TTCTCATGTTGTTGGATCCC
o759	CGTGGAATGACCTCATACTC
o760	AGGACGACACGTATGAATCCGGAAGTGGAAGCGGAAGTATGTCCAAGGGAGAGGAGCTC
o761	TGAGAAGTCCAGCCTTGGGCACTTCCGCTTCCACTTCCCTTGTAGAGCTCGTCCATTC
o762	GGATTCATACGTGTCGTCCTG
o763	GCCCAAGGCTGGACTTCTCAAG
o932	GGGGACAACTTTGTATAGAAAAGTTGCTAGTGAATAAATCCCCAAC
o1001	AACATAGAACATTTTCAGGAGGACCCTTGGCTAGCAAAAATGAAGGCAGAGCAACAAC
o1002	GTTCTTCTCCTTTACTCATTTTTTCTACCGGTACCACTGCATCATACGAGTAGTCGG
o1069	AACCCCACTTTTTGGTCCAC
o1130	AAAACCGGTAGCGCTAGCTGTTCGAACCCTTCAAACCA
o1182	TGTACAAGTCCGGACTCAGATCTCGCGGCCGCATGTCGAACGAAGGCGATCC
o1183	ATCTAGATCCGGTGGATCCCGGGCCCGCGGTACCTTCCGATTGCAACGTATGAGC
o1190	GCTGTACAAGTCCGGACTCAGATCTCGCGGCCGCGAACATCAGCCAACCTCAAC
o1191	CTAGATCCGGTGGATCCCGGGCCCGCGGTACCTTAAAAGTGTGGTTGCTGTTGGTC
o1199	AGATCTCGAGCTCAAGCTTCGAATTCTGCAATGAAGGCAGAGCAACAACA
o1200	TTATGATCAGTTATCTAGATCCGGTGGATCTCATGCATCATACGAGTAGTCGGC
o1208	AATCATCCGATCAACGCTGG
o1209	CCAACATGGCAACTCCTCCA
o1248	CAAGTCCGGACTCAGATCTCGCGGCCGCTTAGGGCGCGCCCAAGACAGATCGGATTCTCC
o1249	GTTCATGAGTTACATGGTCG
o1250	AGTTCCATCGGAAGAAGACG
o1251	ATGATCAGTTATCTAGATCCGGTGGATCCCCATCGTCATCATCCCTATGC
o1258	CGAGCTCAAGCTTCGAATTCTGCAGTCGACGGTACCAGAATATCAGGAAGAGTCAGG
o1260	GATCAGTTATCTAGATCCGGTGGATCCCGGGCCCCCCGGCGCGCCCTTCTTTCTCGCTTG
o1261	AGAAATCGCCGACTTGCGAG
o1311	CCAAGCTACGTAATACGACTCACTAGTGCTAGCAGATCTCAAAGTACATACATTC
o1312	TGGCCTTACGACGACGGGACATTTTTGCGGCCGCCAAGGGTCCTCCTGAAAATG
o1315	TCTTGATGCATAATTTCCCGCCGA
o1316	TCGGCGGGAAATTATGCATCGTTT
o1317	GACGTTGTAAAACGACGGCCAGTCGCCGGCGGATTCTGTATGCCAAATTC
o1318	CATCGATGCTCCTGAGGCTCCCGATGCTCCTGCATCATACGAGTAGTCGGTCTTATTGTG
o1319	CGTGATTACAAGGATGACGATGACAAGAGATAATTTCCCGCCGATGAAATAAAAC
o1320	AGGAAACAGCTATGACCATGTTATCGATTTGGTCGGAATTGGAATGTTCG
o1392	TCCAGTGAAAAGTTCTTCTCCTTTACTCATTTTTGCTAGCCAAGGGTCCTCCTGAAAATG
o1407	GCCATGGTGACGTCACCGGTTCTAGATACCTAGGATAAATGCAAAATCCTTTCAAG
o1408	AAACGACGGCCAGTCCGTAATACGACTCACTTAAGTGAGACTTTTTTCTTGGCGG
o1409	AACATAGAACATTTTCAGGAGGACCCTTGCCATGGAAAAATGGTGAGCAAGGGCGAGGA
o1410	GTCCGACGTGGATGGAGATGACCTCACGACTTCCGCTAGCCTTGTACAGCTCGTCCATGC
o1411	GTCGTGAGGTCATCTCCATC
o1412	AGGGAATGCTTGAAAGGATTTTGCATTTATCCTAGGCTAATACTCTTCTCCTTCCTCC
o1413	GATAAATGCAAAATCCTTTC
o1414	CAAGCTACGTAATACGACTCACTAGTGGGCAGATCTCAAAGTACATACATTCTTAA
o1416	CCTAGGTATCTAGAACCGGTGACGTCACCATGGCAAGGGTCCTCCTGAAAATG
o1425	AGAAAAAGATGCTGAAGCTC
o1426	ATAATAAAGTTGCTACGAATTCTTGTGGTGACCGT
o1427	CACCACAAGAATTCGTAGCAACTTTATTATACATAG
o1458	GGCCTTGACTAGAGGGTACCAGAGCTCACCTAGGGATGGGAGCAGTGGACTGTC
o1459	TACCTTTGGGTCCTTTGGCCAATCCCGGGGATCCCTGAAAATAGGGCTACTGTA
o1486	CGTGTAGTCCCGGAGAACAAGTCGATCGTCGCGATGCTGGAGAAAAAGATGCTG
o1487	TGATCTTACTTGCACTTATAATACGACTCACTAGTAGAAACAGTTATGTTTGGT
o1506	AGGGAATGCTTGAAAGGATTTTGCATTTATCCTAGGCTACCAAAACCCTGTAGTCC
o1508	AACATAGAACATTTTCAGGAGGACCCTTGCCATGGAAAAATGTCCCGTCGTCGTAAG
o1509	TCCACTTCCGCTTCCACTTCCGCCGGCGGAGGAGACGGTGACTTGGG
o1510	TCCGCCGGCGGAAGTGGAAGCGGAAGTGGAGGAGGCGGCGGTGAAATGTC
o1538	GGCATGGACGAGCTGTACAAGTCCGGACTCAGATCTATGAAGGCAGAGCAACAAC
o1539	ATCCGGTGGATCCCGGGCCCGCGGTACCGTCGACCTATGCATCATACGAGTAGTC
o1622	TTGTGCCGCCAAGAAAAAAGTCTCACTCGACATCTCGCGGGTTAAATC
o1632	AGCTACGTAATACGACTCACTAGTGGGCAGATCTGATGGGAGCAGTGGACTGTC
o1633	GGTTGGCCTTACGACGACGGGACATTTTTCCATGGCTGAAAATAGGGCTACTGTAG
o1654	GAGCTACAGTACACTCTGATAACAAAATCTGGCAGGTCGACTCCACGTAATTTCACAACA
PLH36	CAACTACCTGTGGGCTCTC
PLH37	TGAGCCAAAGCAAGAGAGCC
PLH34	CAGTTATCTAGATCCGGTGGATCCCGGGCCCCTGGTTCATCATAGTACTCAC
PLH35	CAAGCTTCGAATTCTGCAGTCGACGGTACCCTTGTCACCGAGACAACAAC
PLHo66	GAGCTGTACAAGTCCGGACTCAGATCTCGCTCTAGAAAATCACCATCTTCCCACTCTCAAG
PLHo65	GAAGAGTTGGAATACAAACAGGAAGACAATTAAGGCGCGCCGGGGGGCCCGGGATCCACCGGATC
PLHo67	GATACTGAAGAAGACTATATTCCATCTGAATAAGCTAGCCATGTTGAACTTGAGCATAGGGATG
PLHo68	GTCCGGACTCAGATCTCGCGGCCGCTTAGGGTCTAGAACATCTCATGATGACGGAATCACTG
